# Supplementary material for: Measuring Under-Five Mortality: Validation of New Low-Cost Methods
Source: PubMed Central journal article supplement (PMC2854123; doi:10.1371/journal.pmed.1000253), 2010-04-13

Armenia, 2001

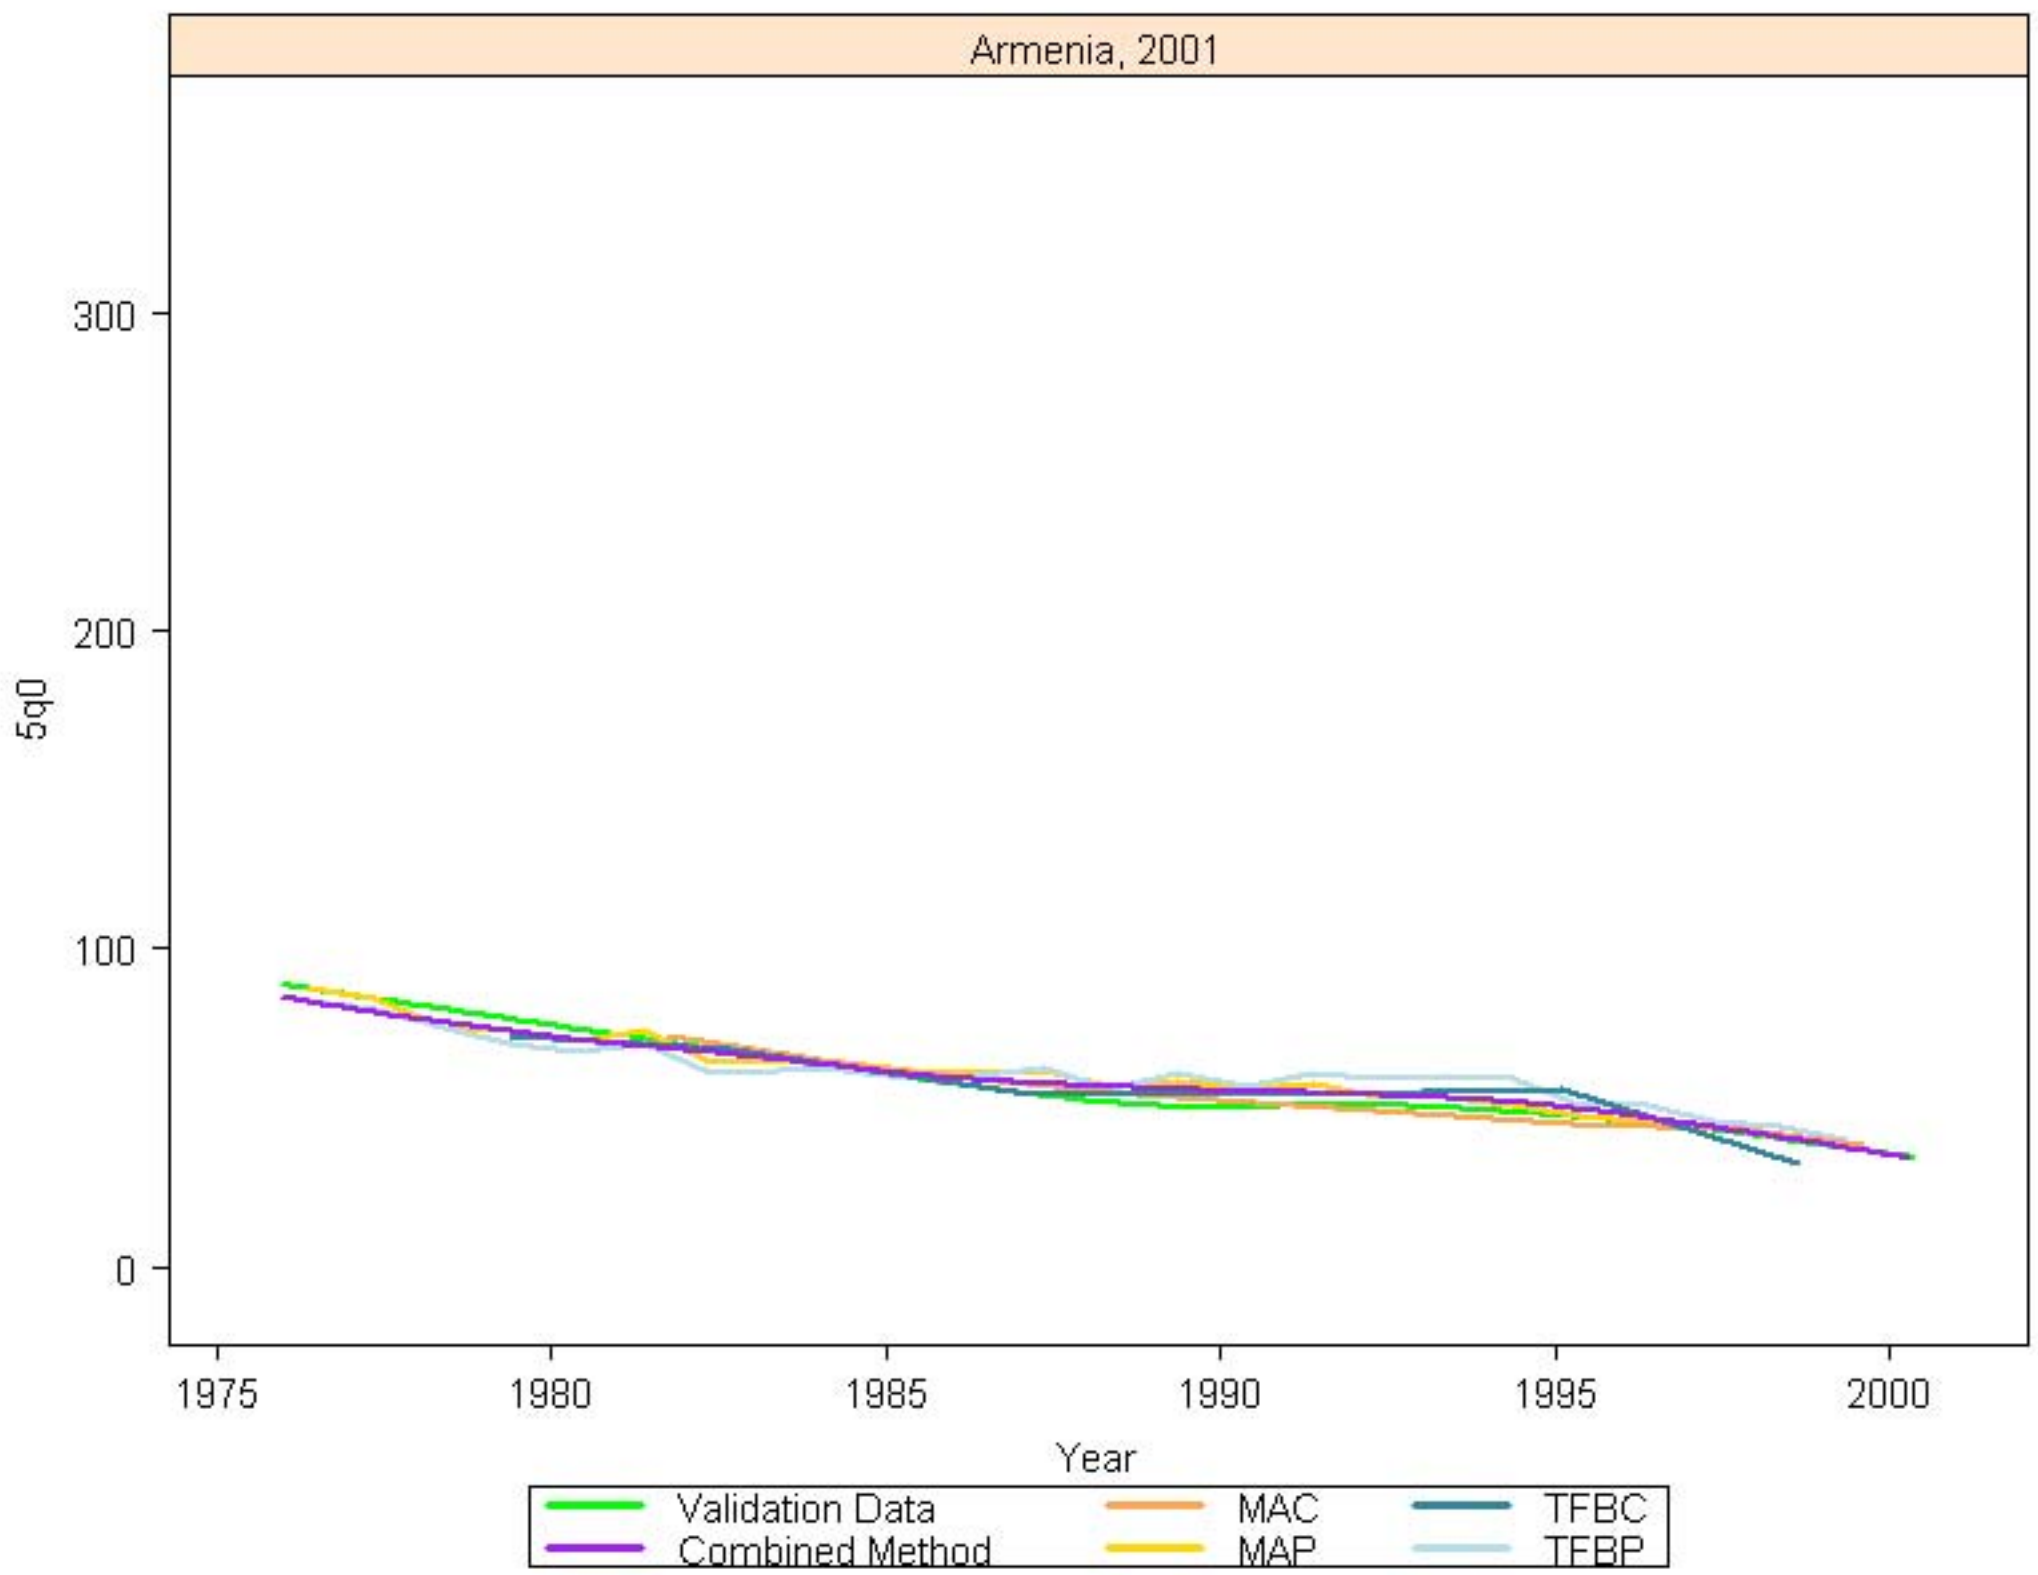

Armenia, 2006

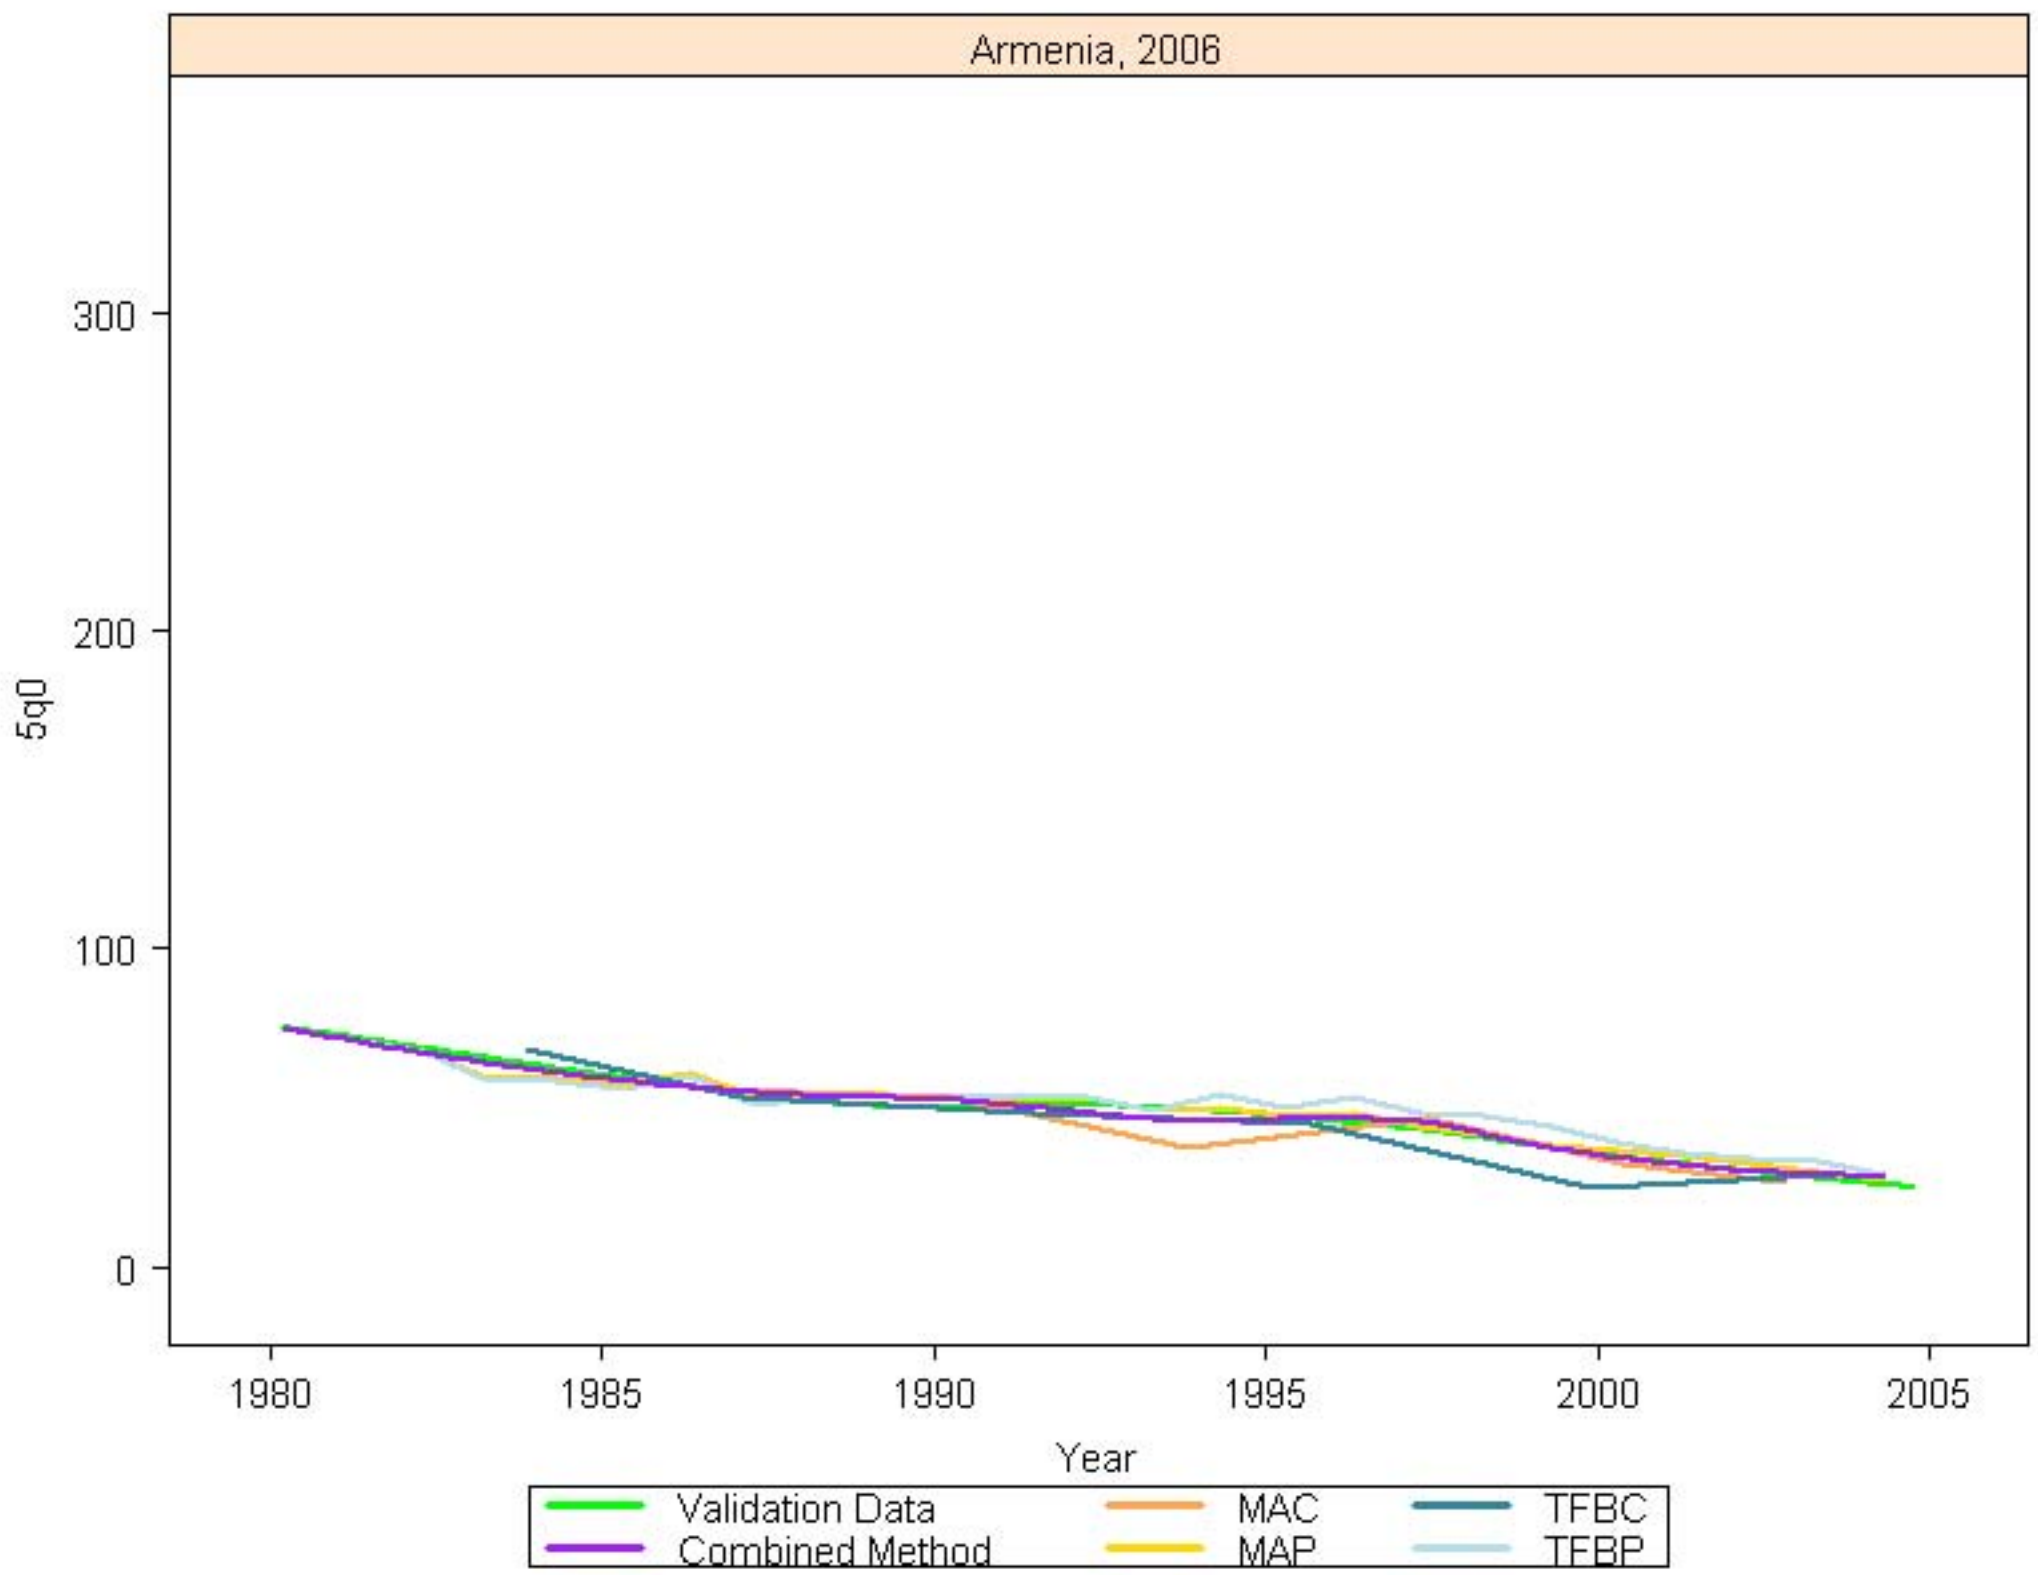

Azerbaijan, 2007

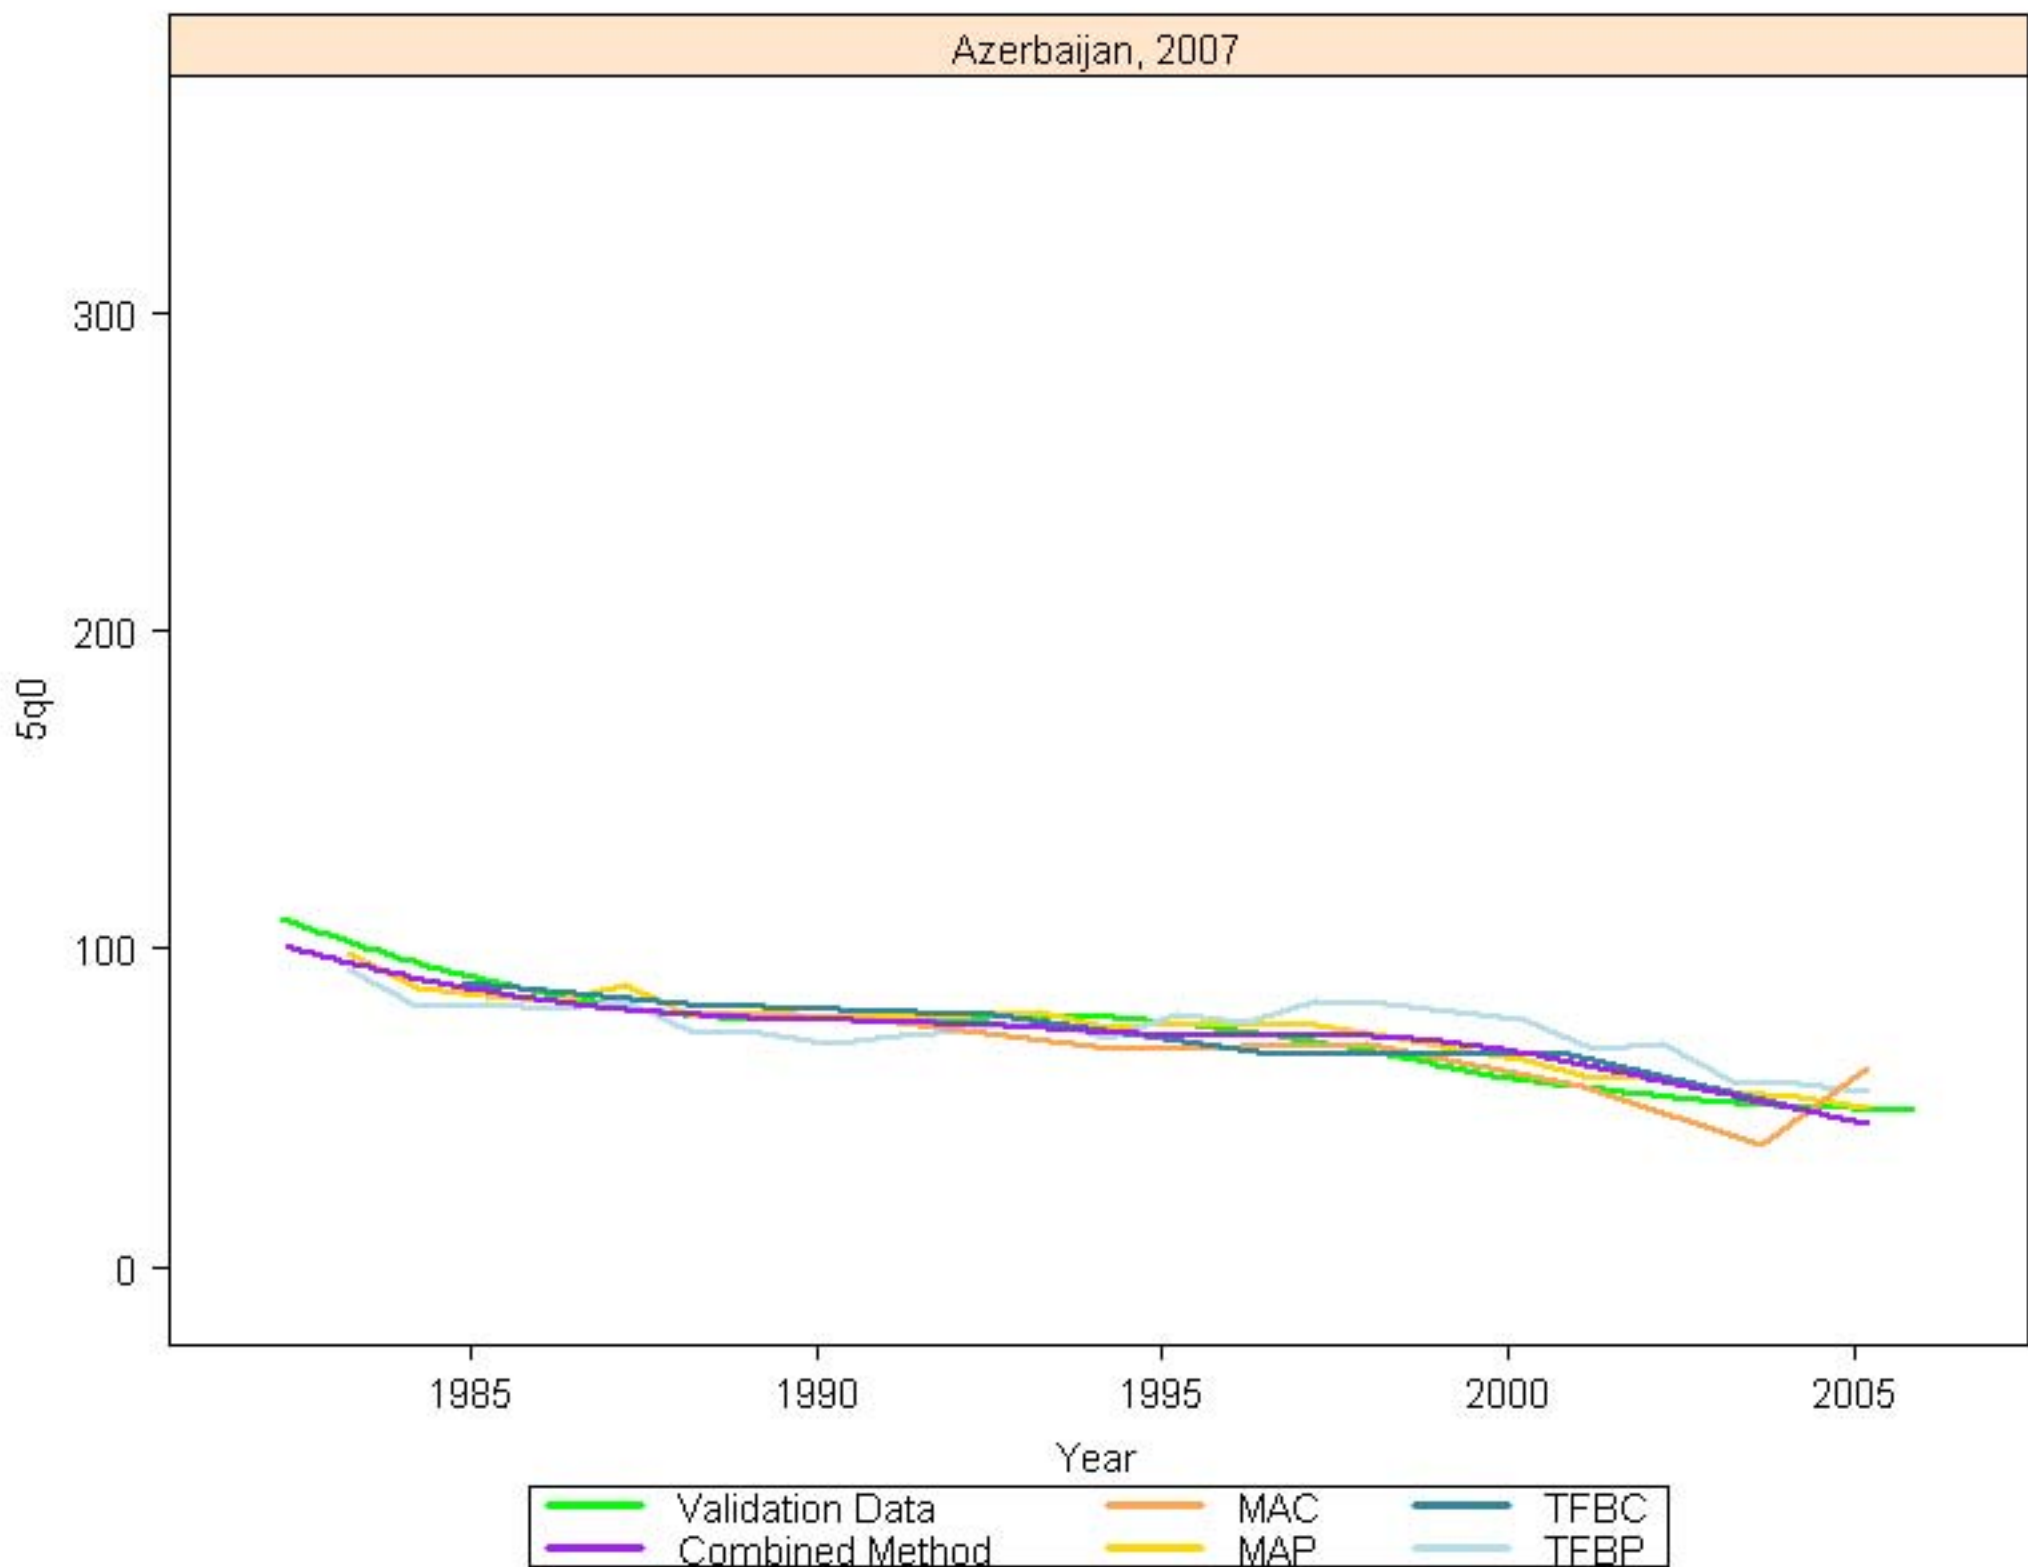

Bangladesh, 1994

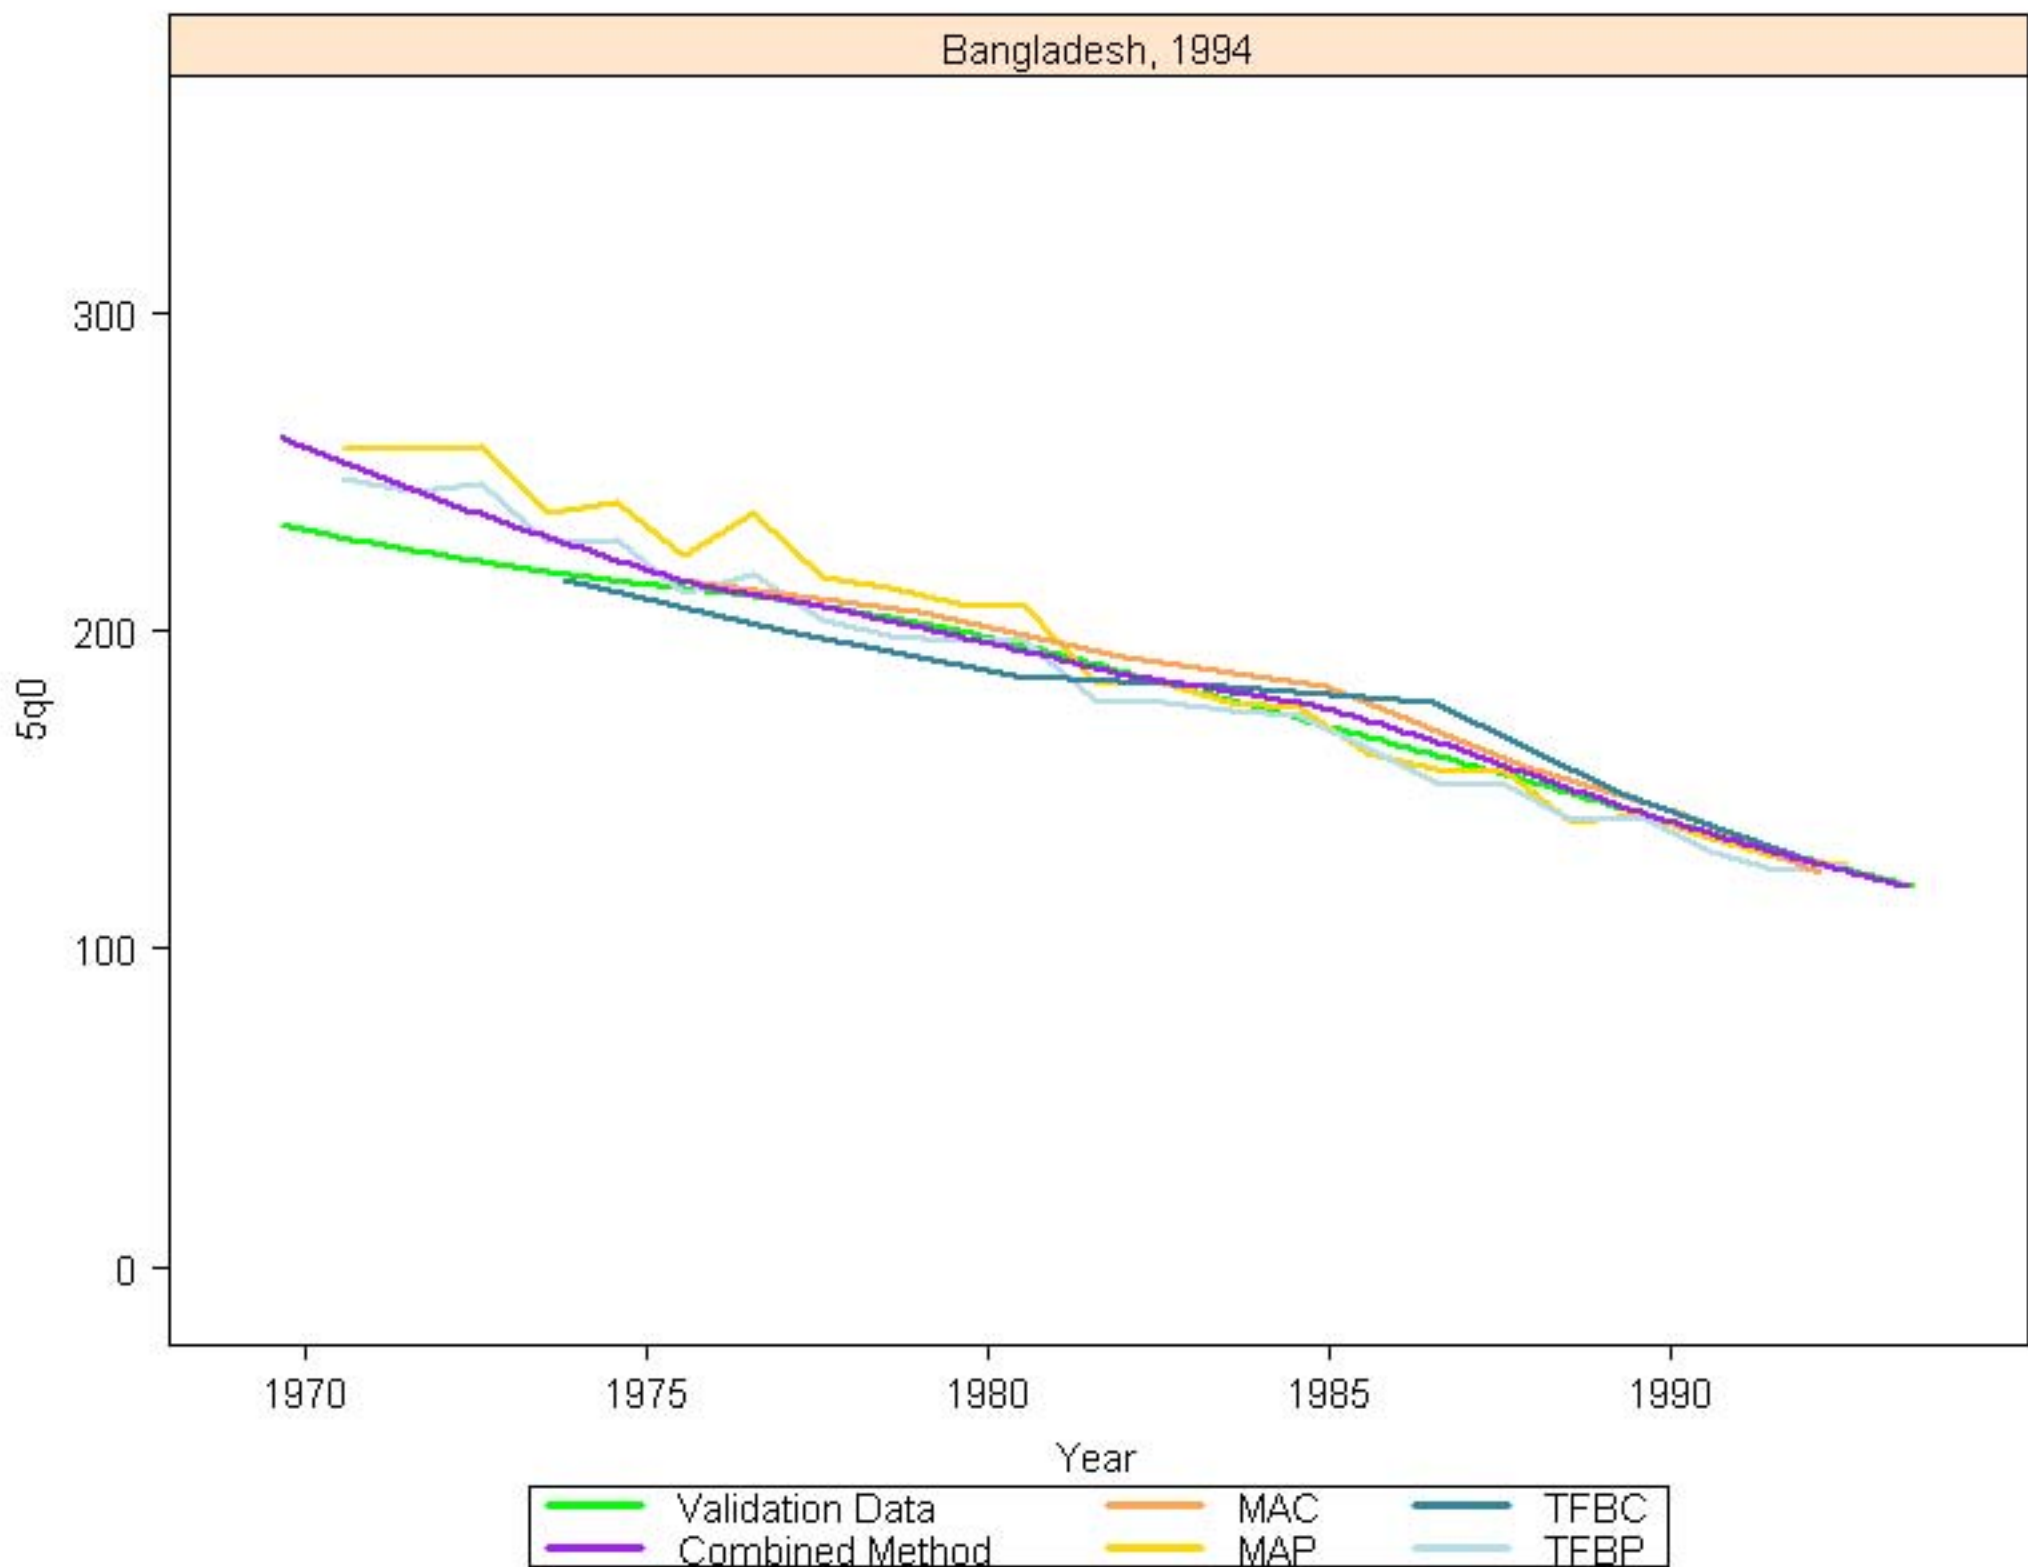

Bangladesh, 1997

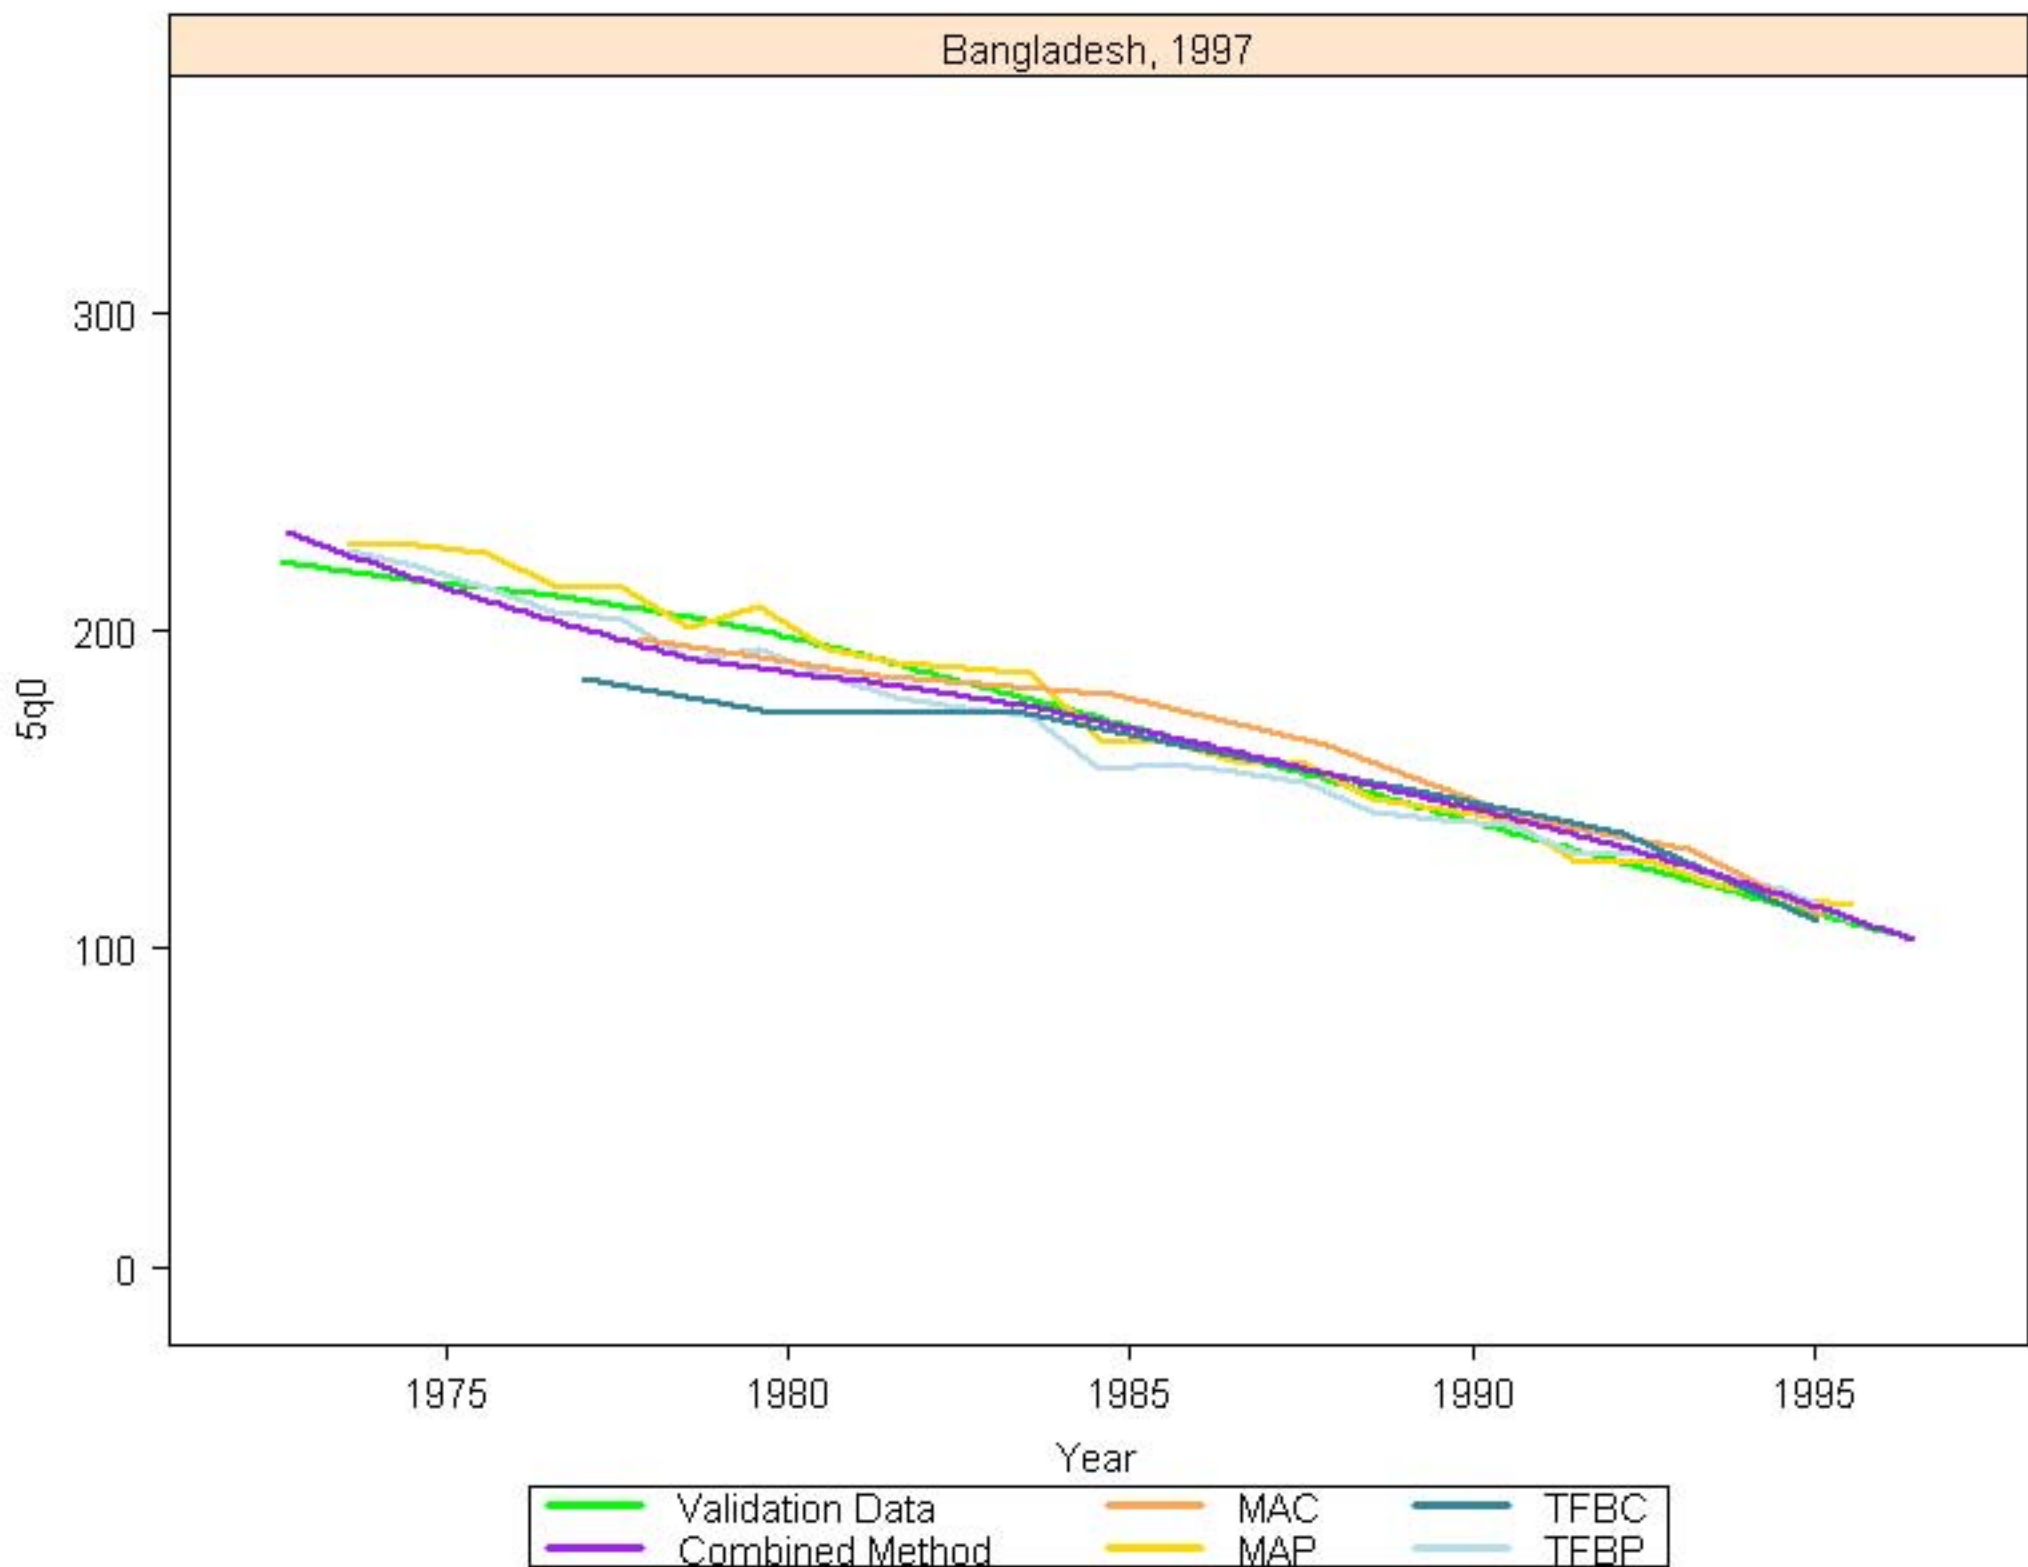

Bangladesh, 2000

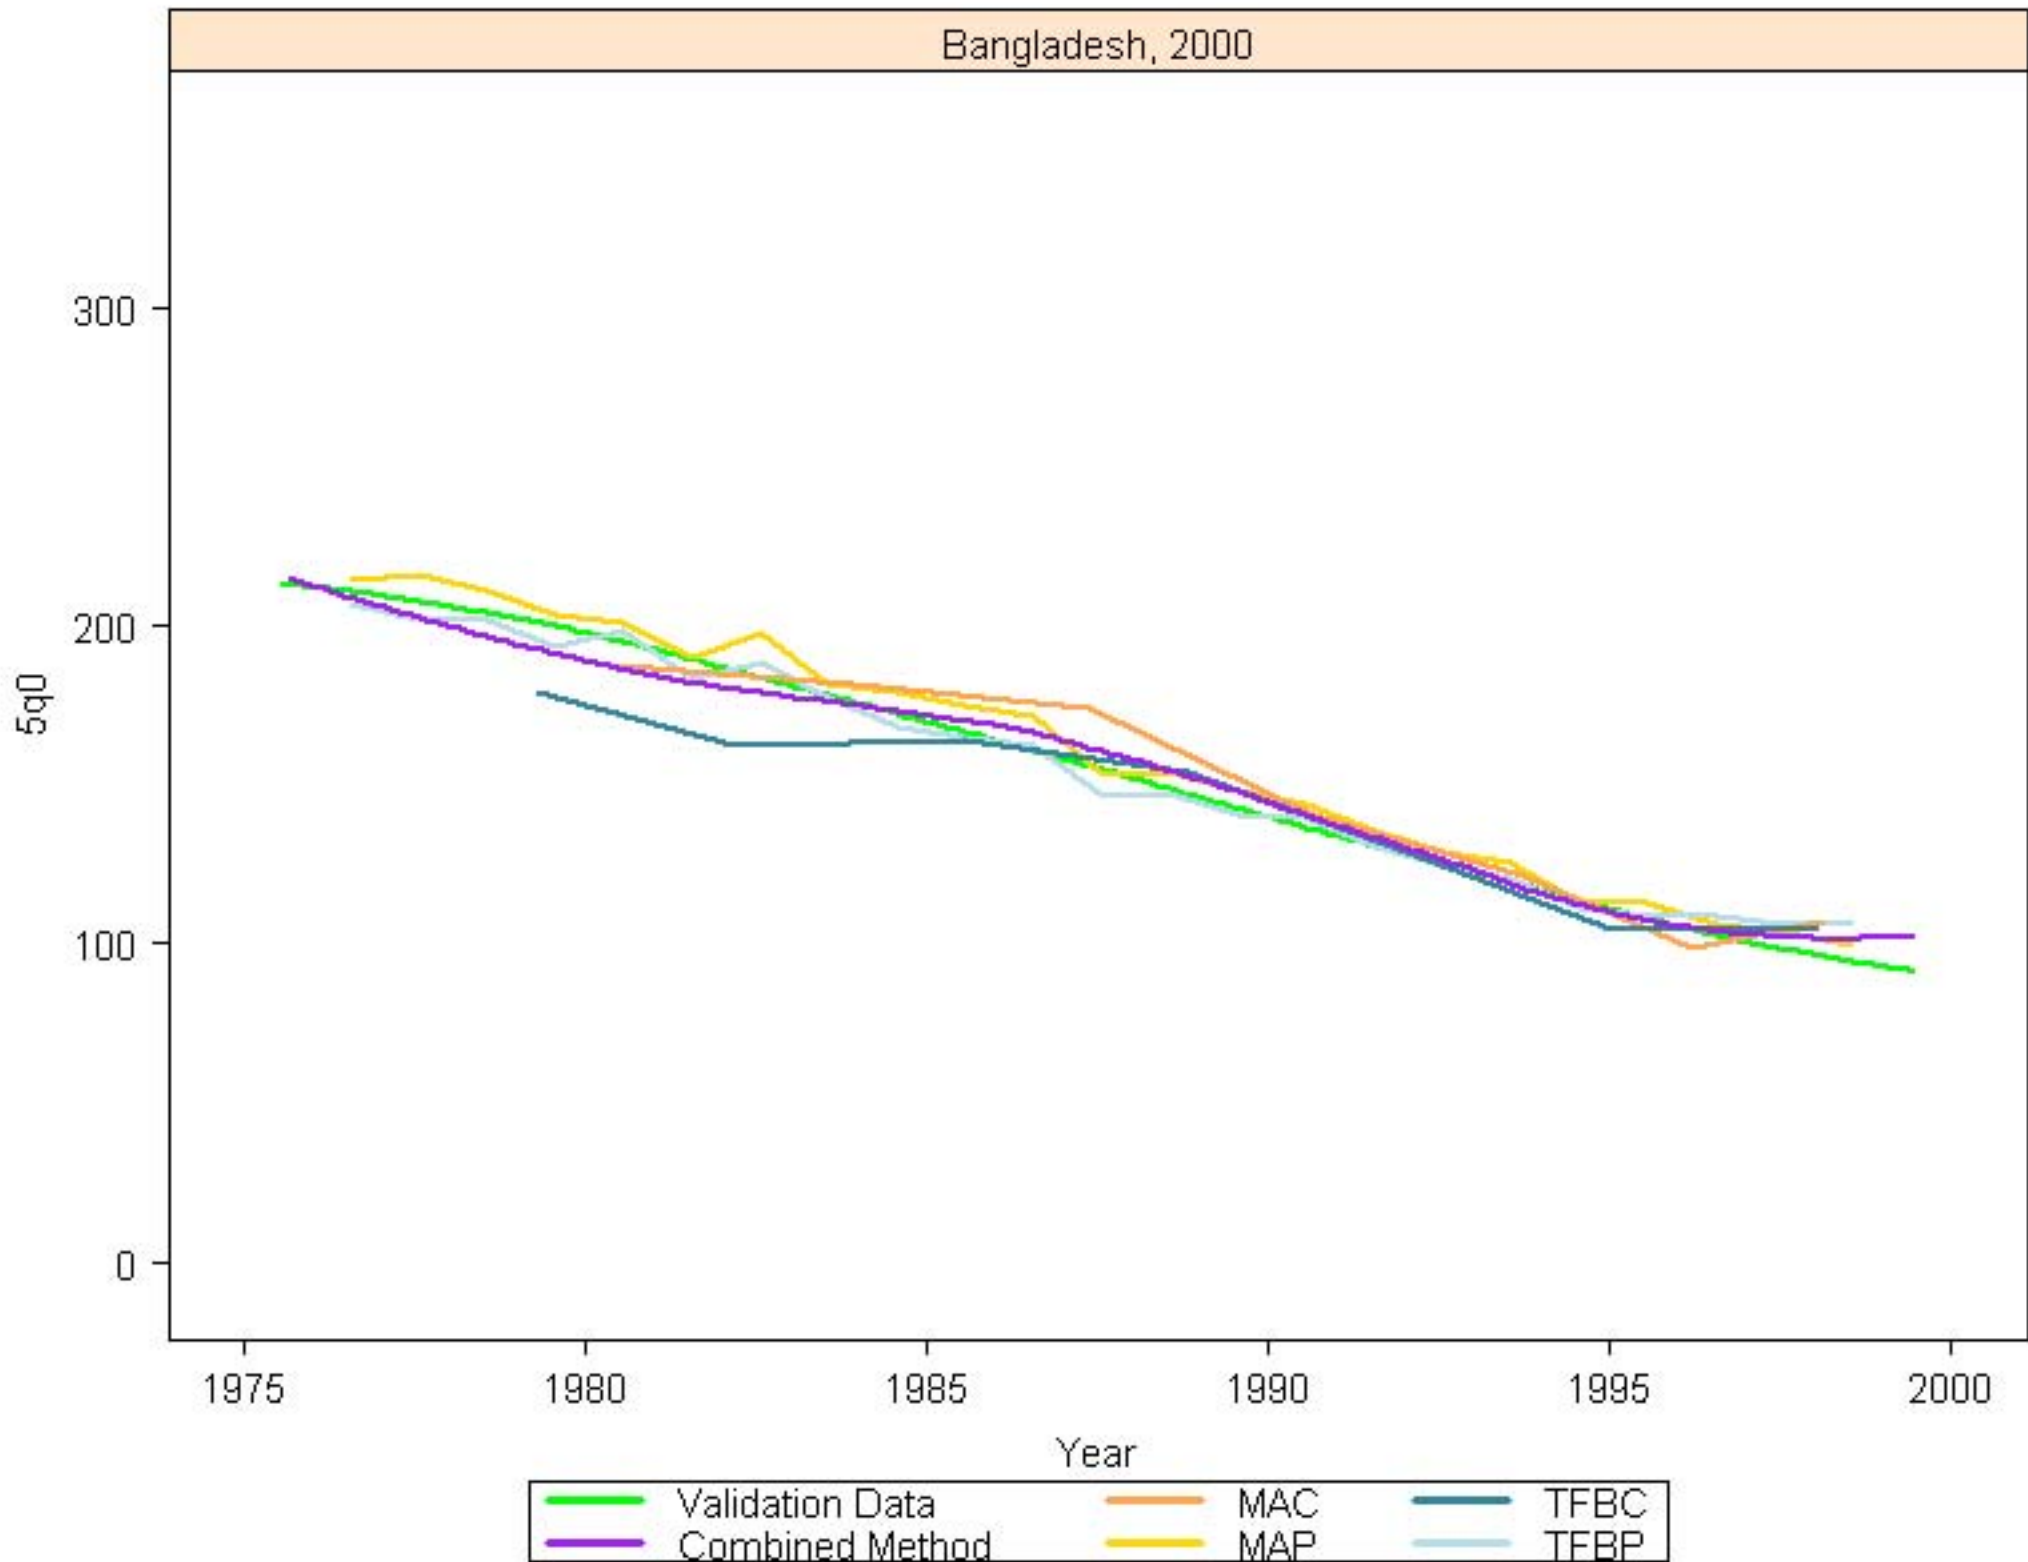

Bangladesh, 2004

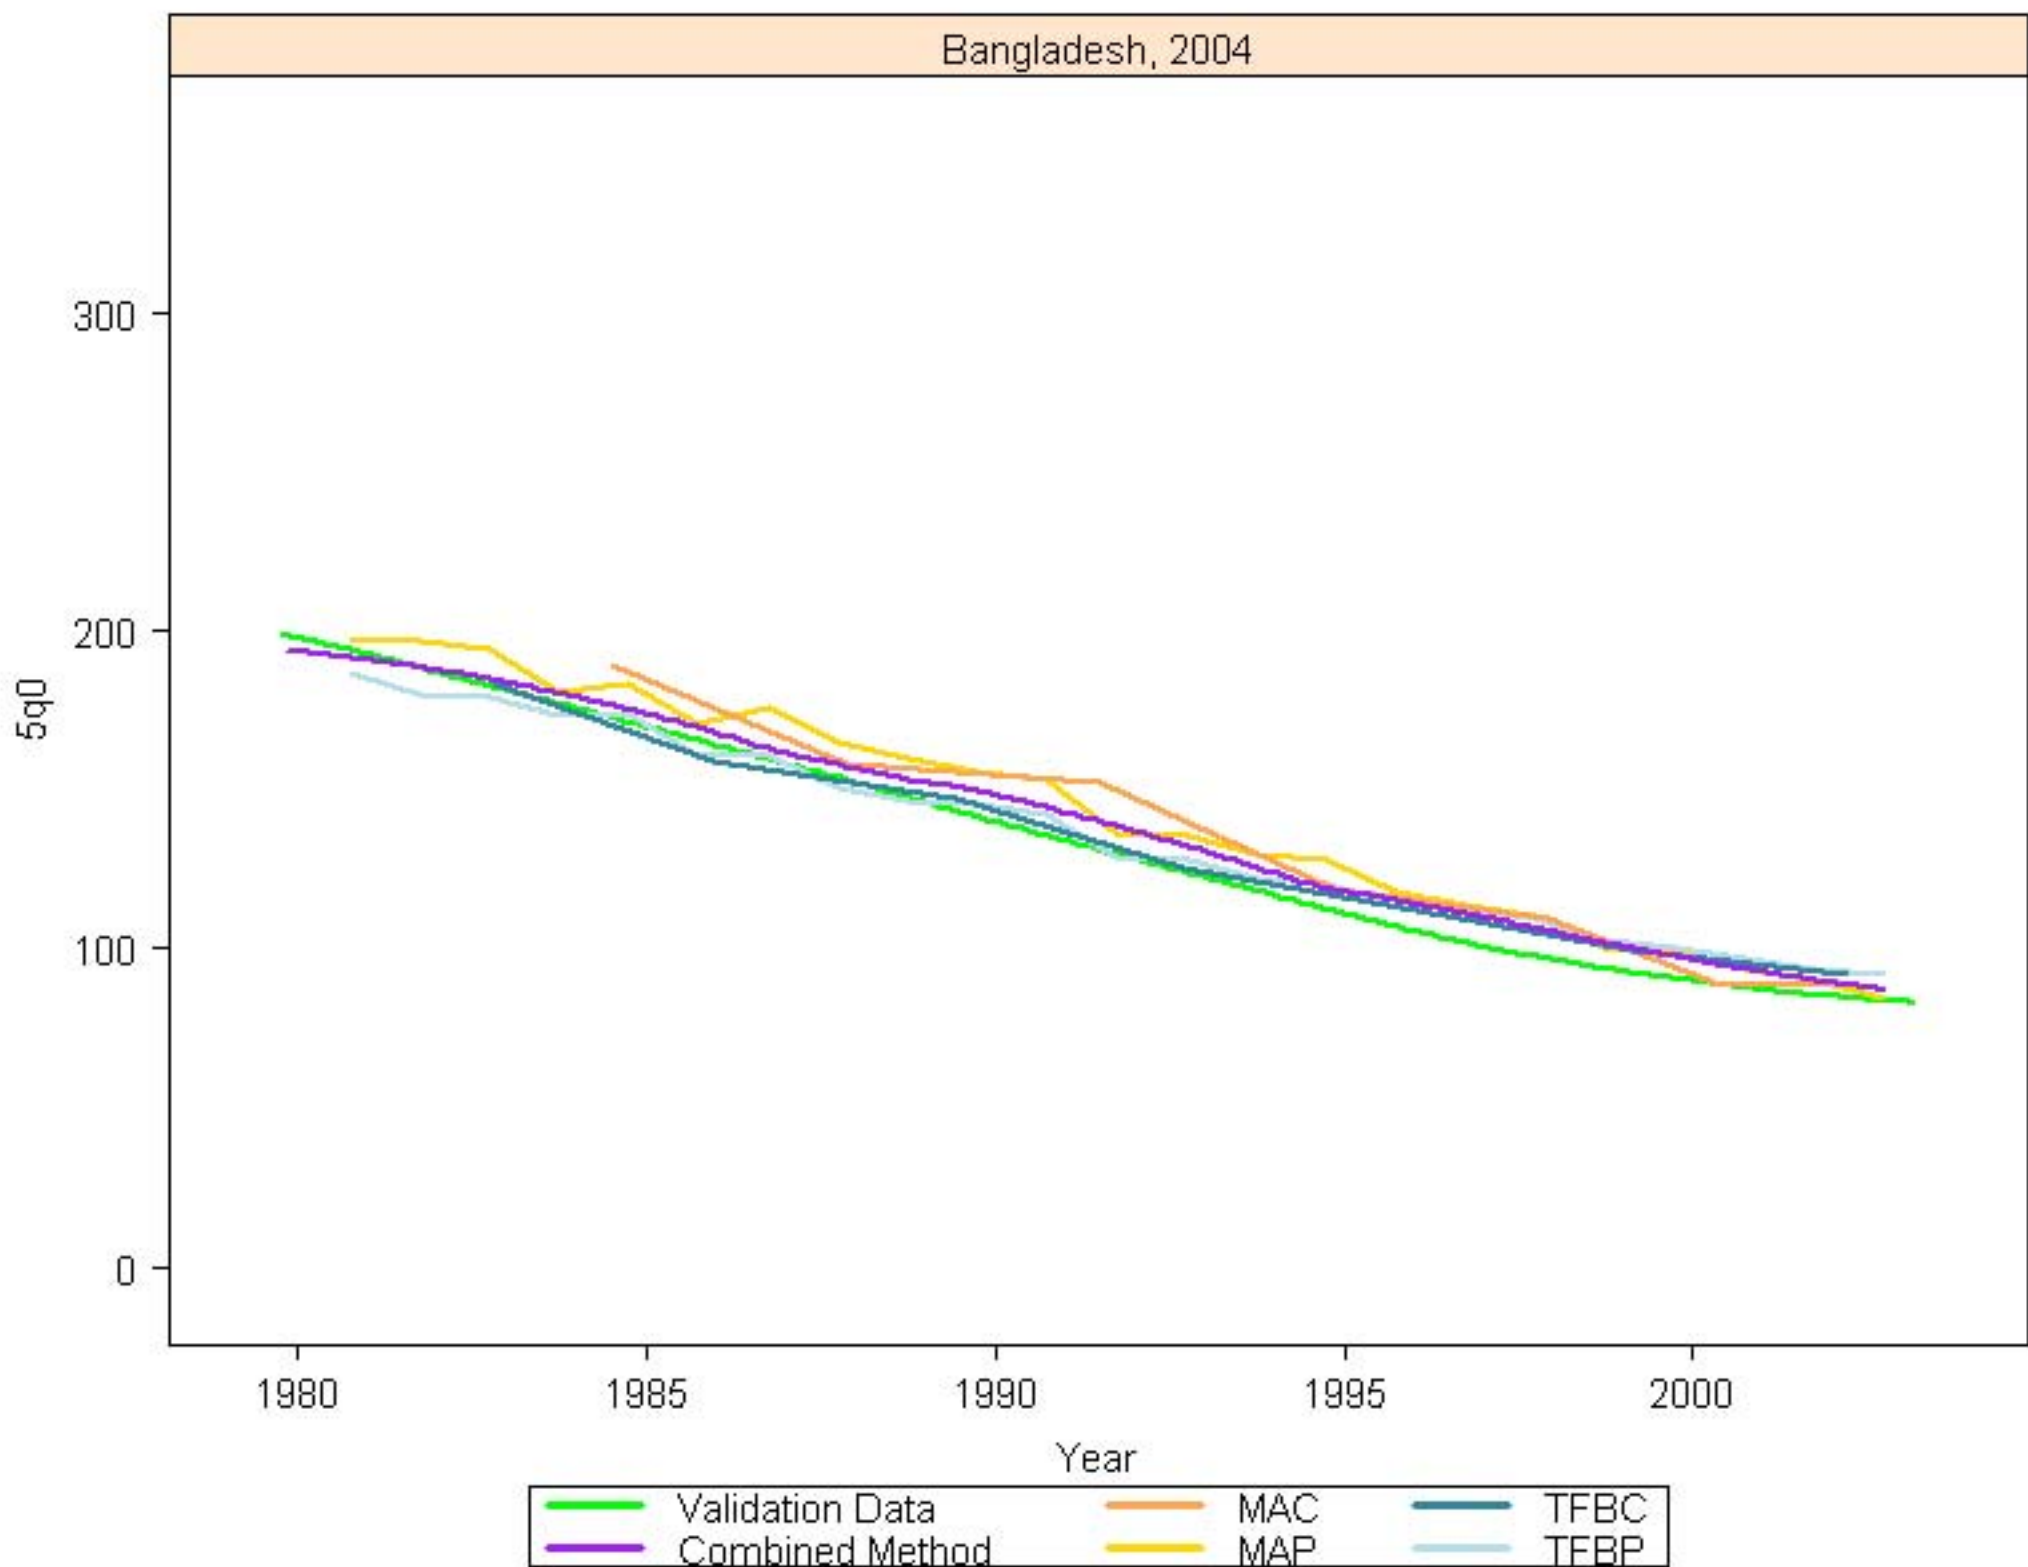

Benin, 1997

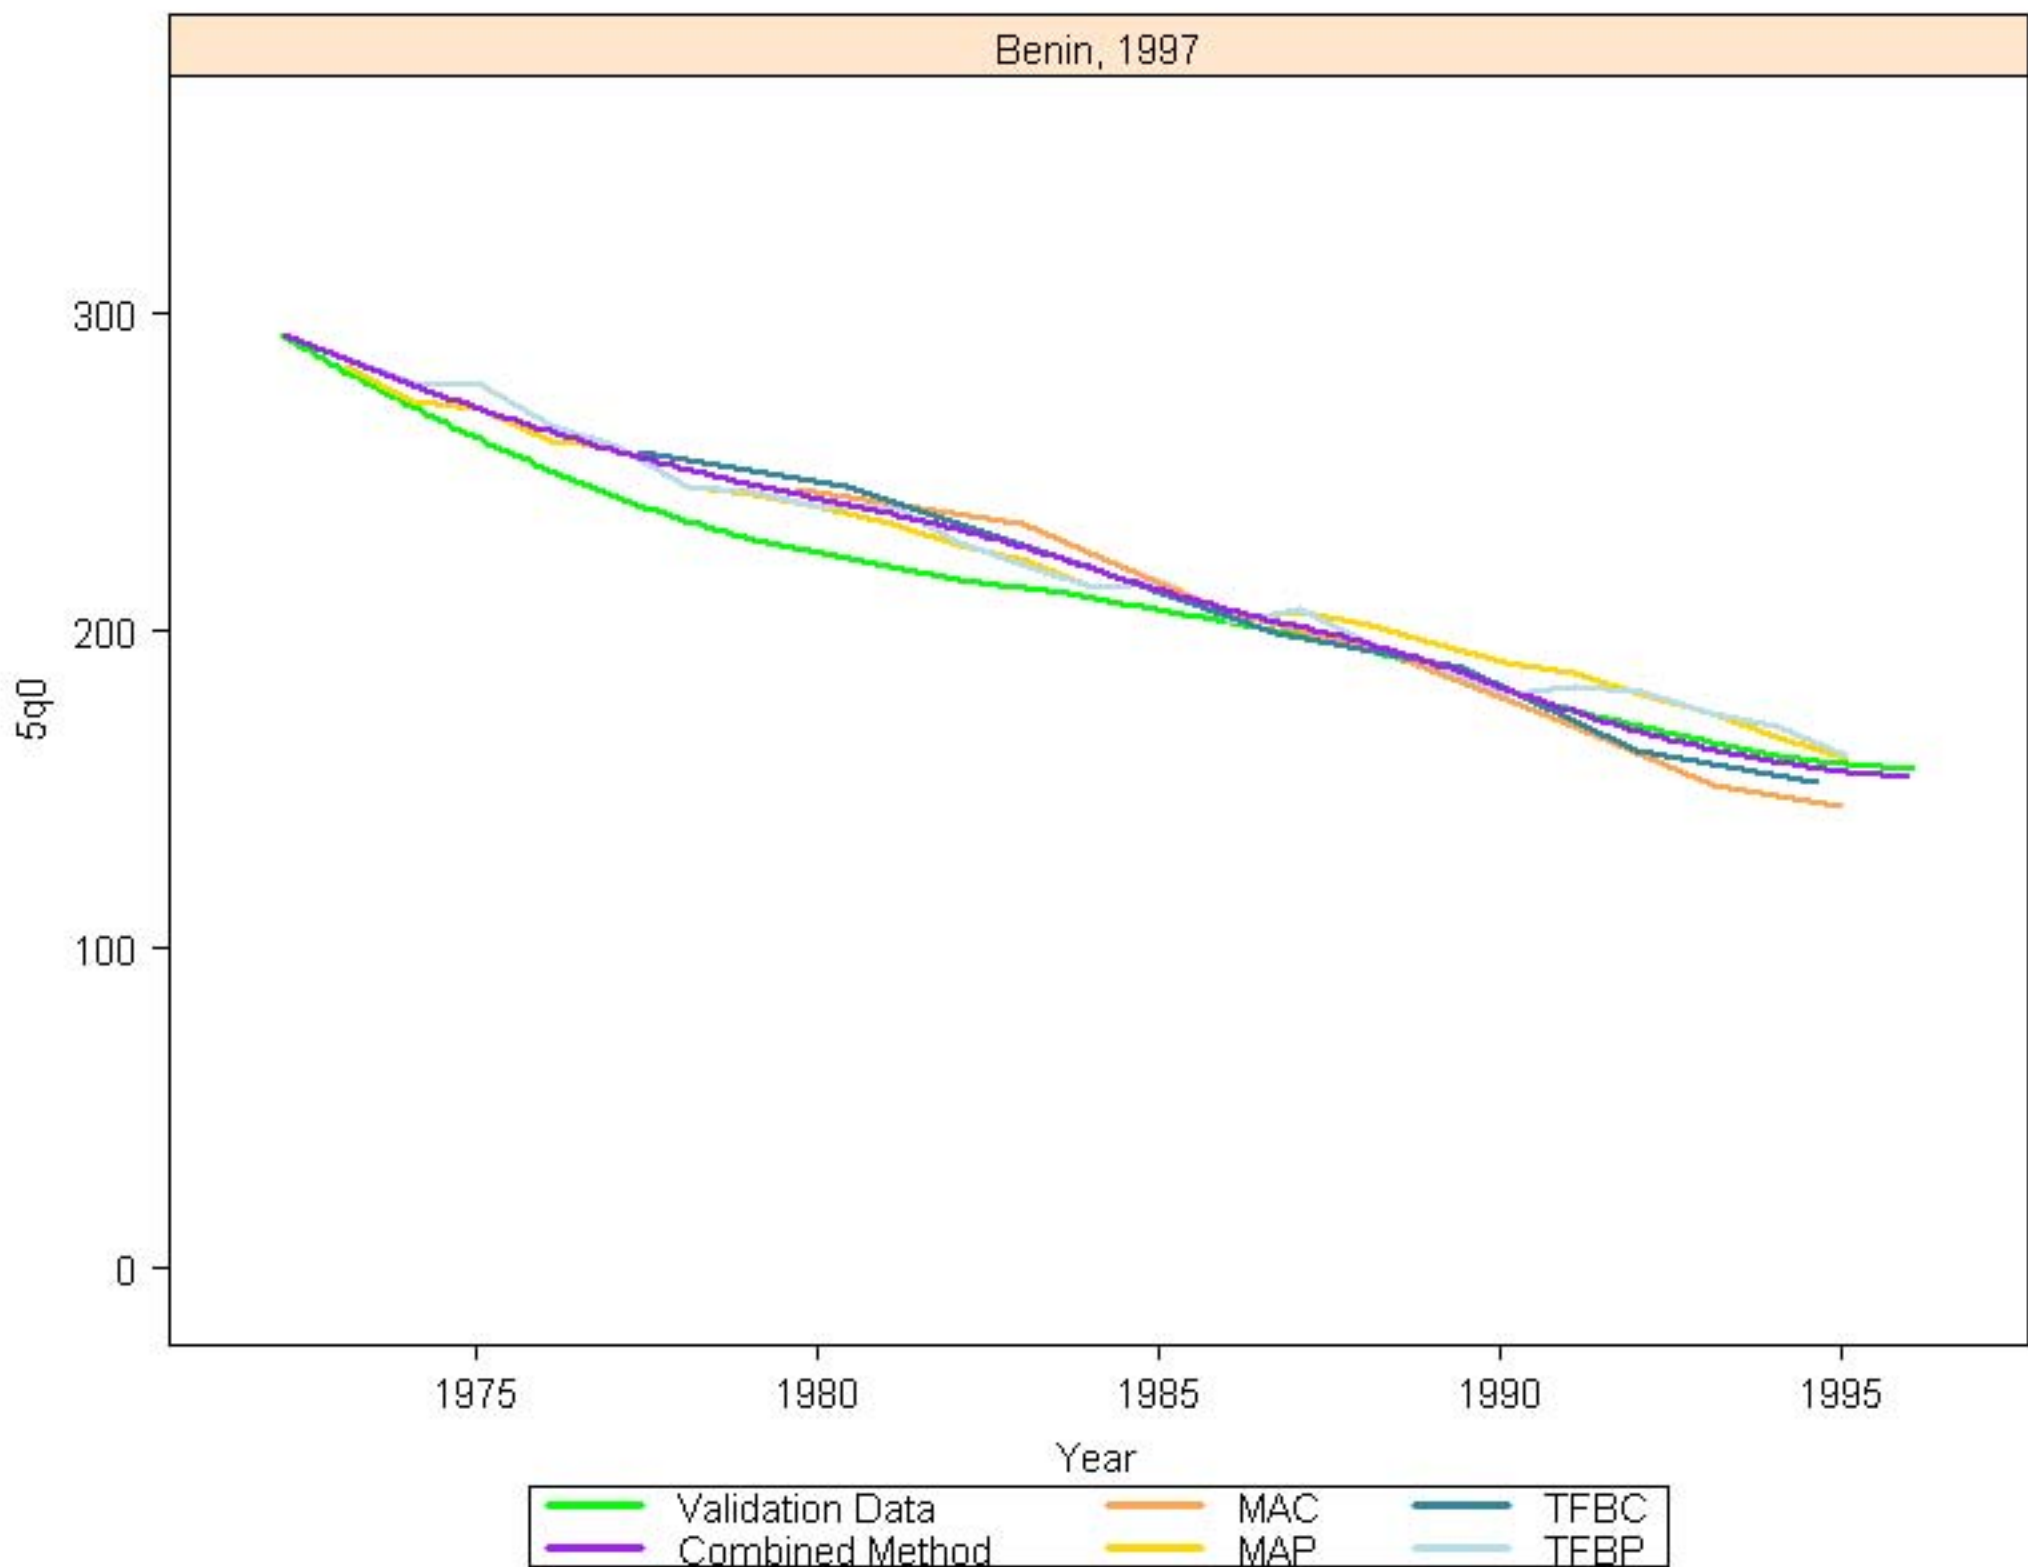



Benin, 2002

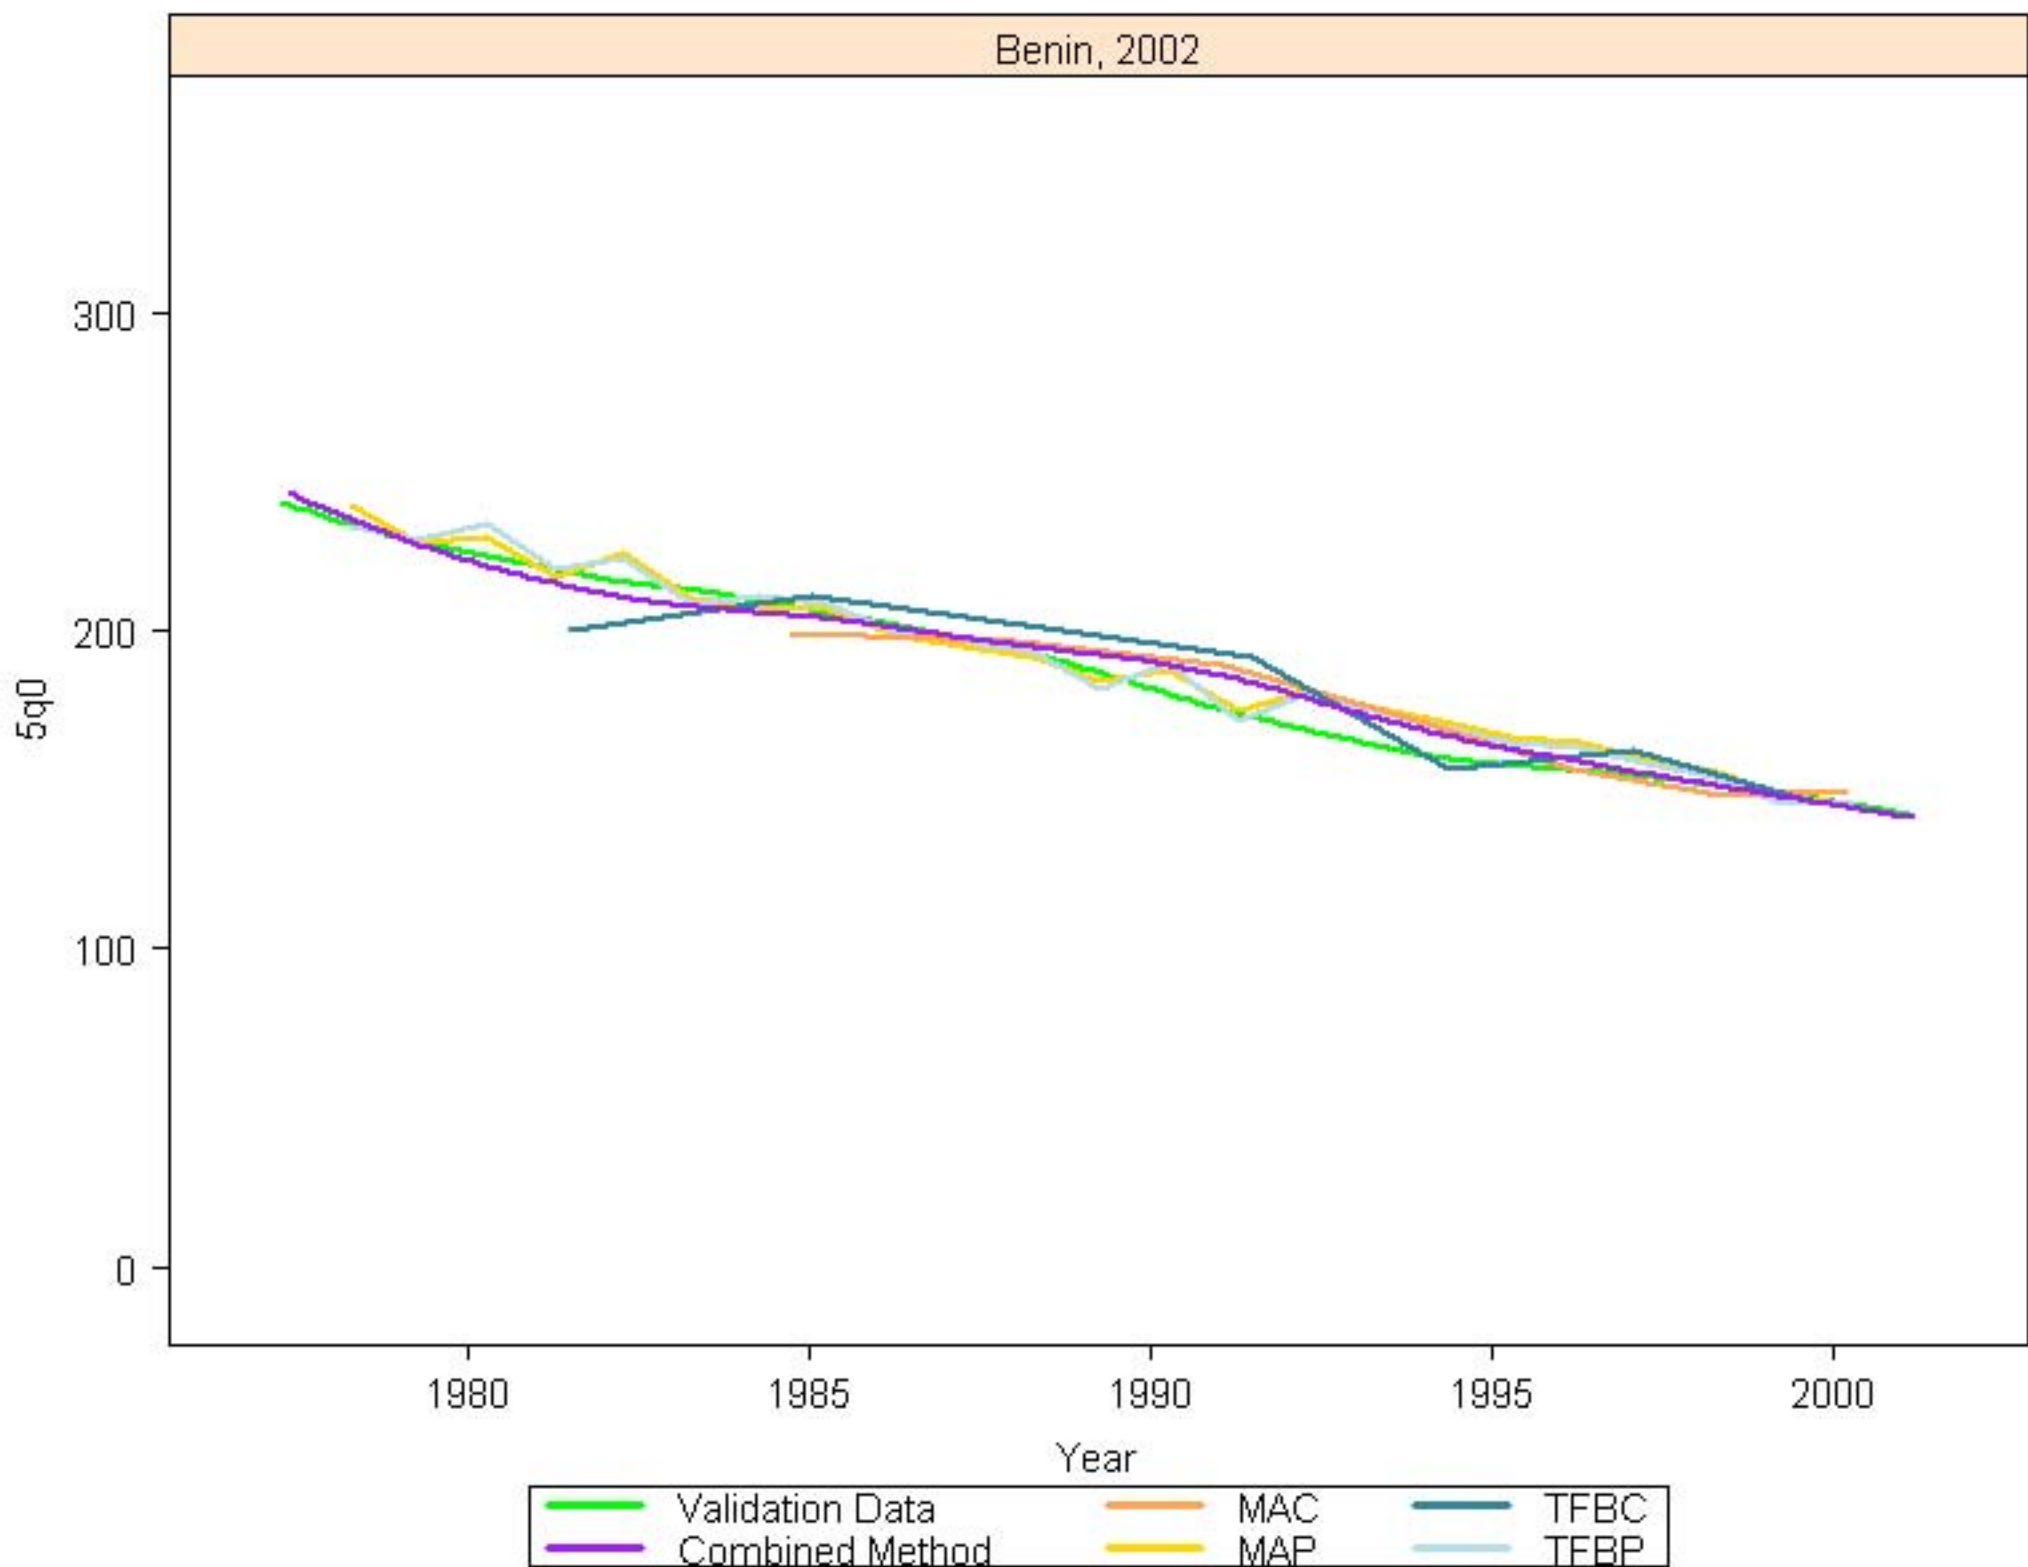

Benin, 2007

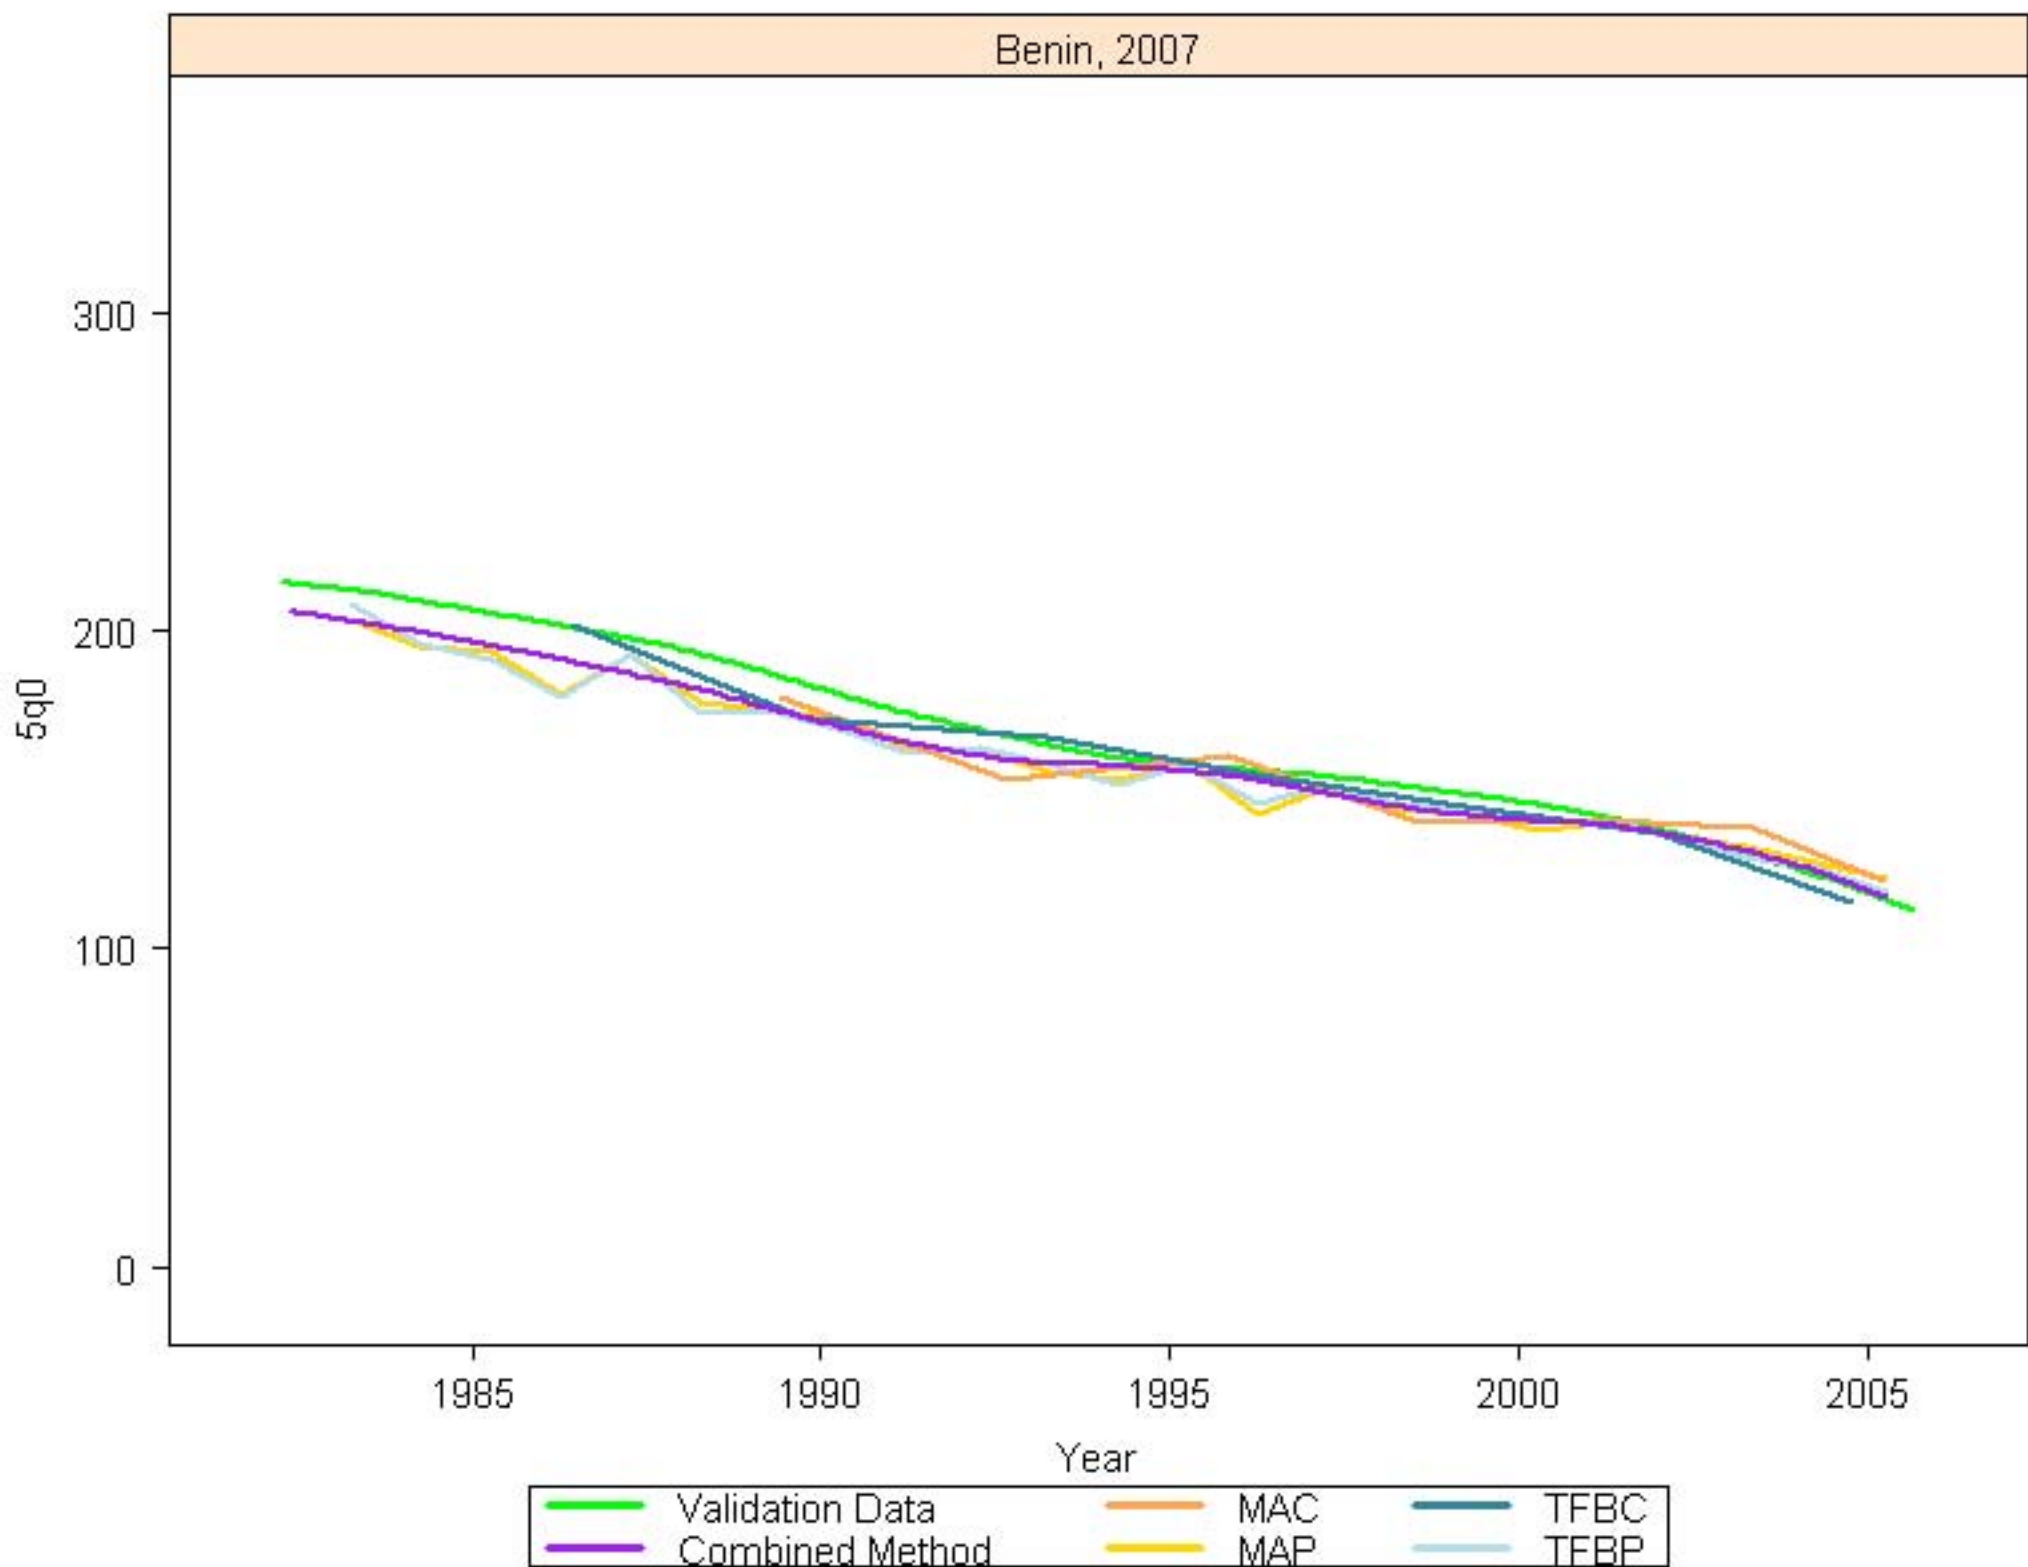

Bolivia, 1989

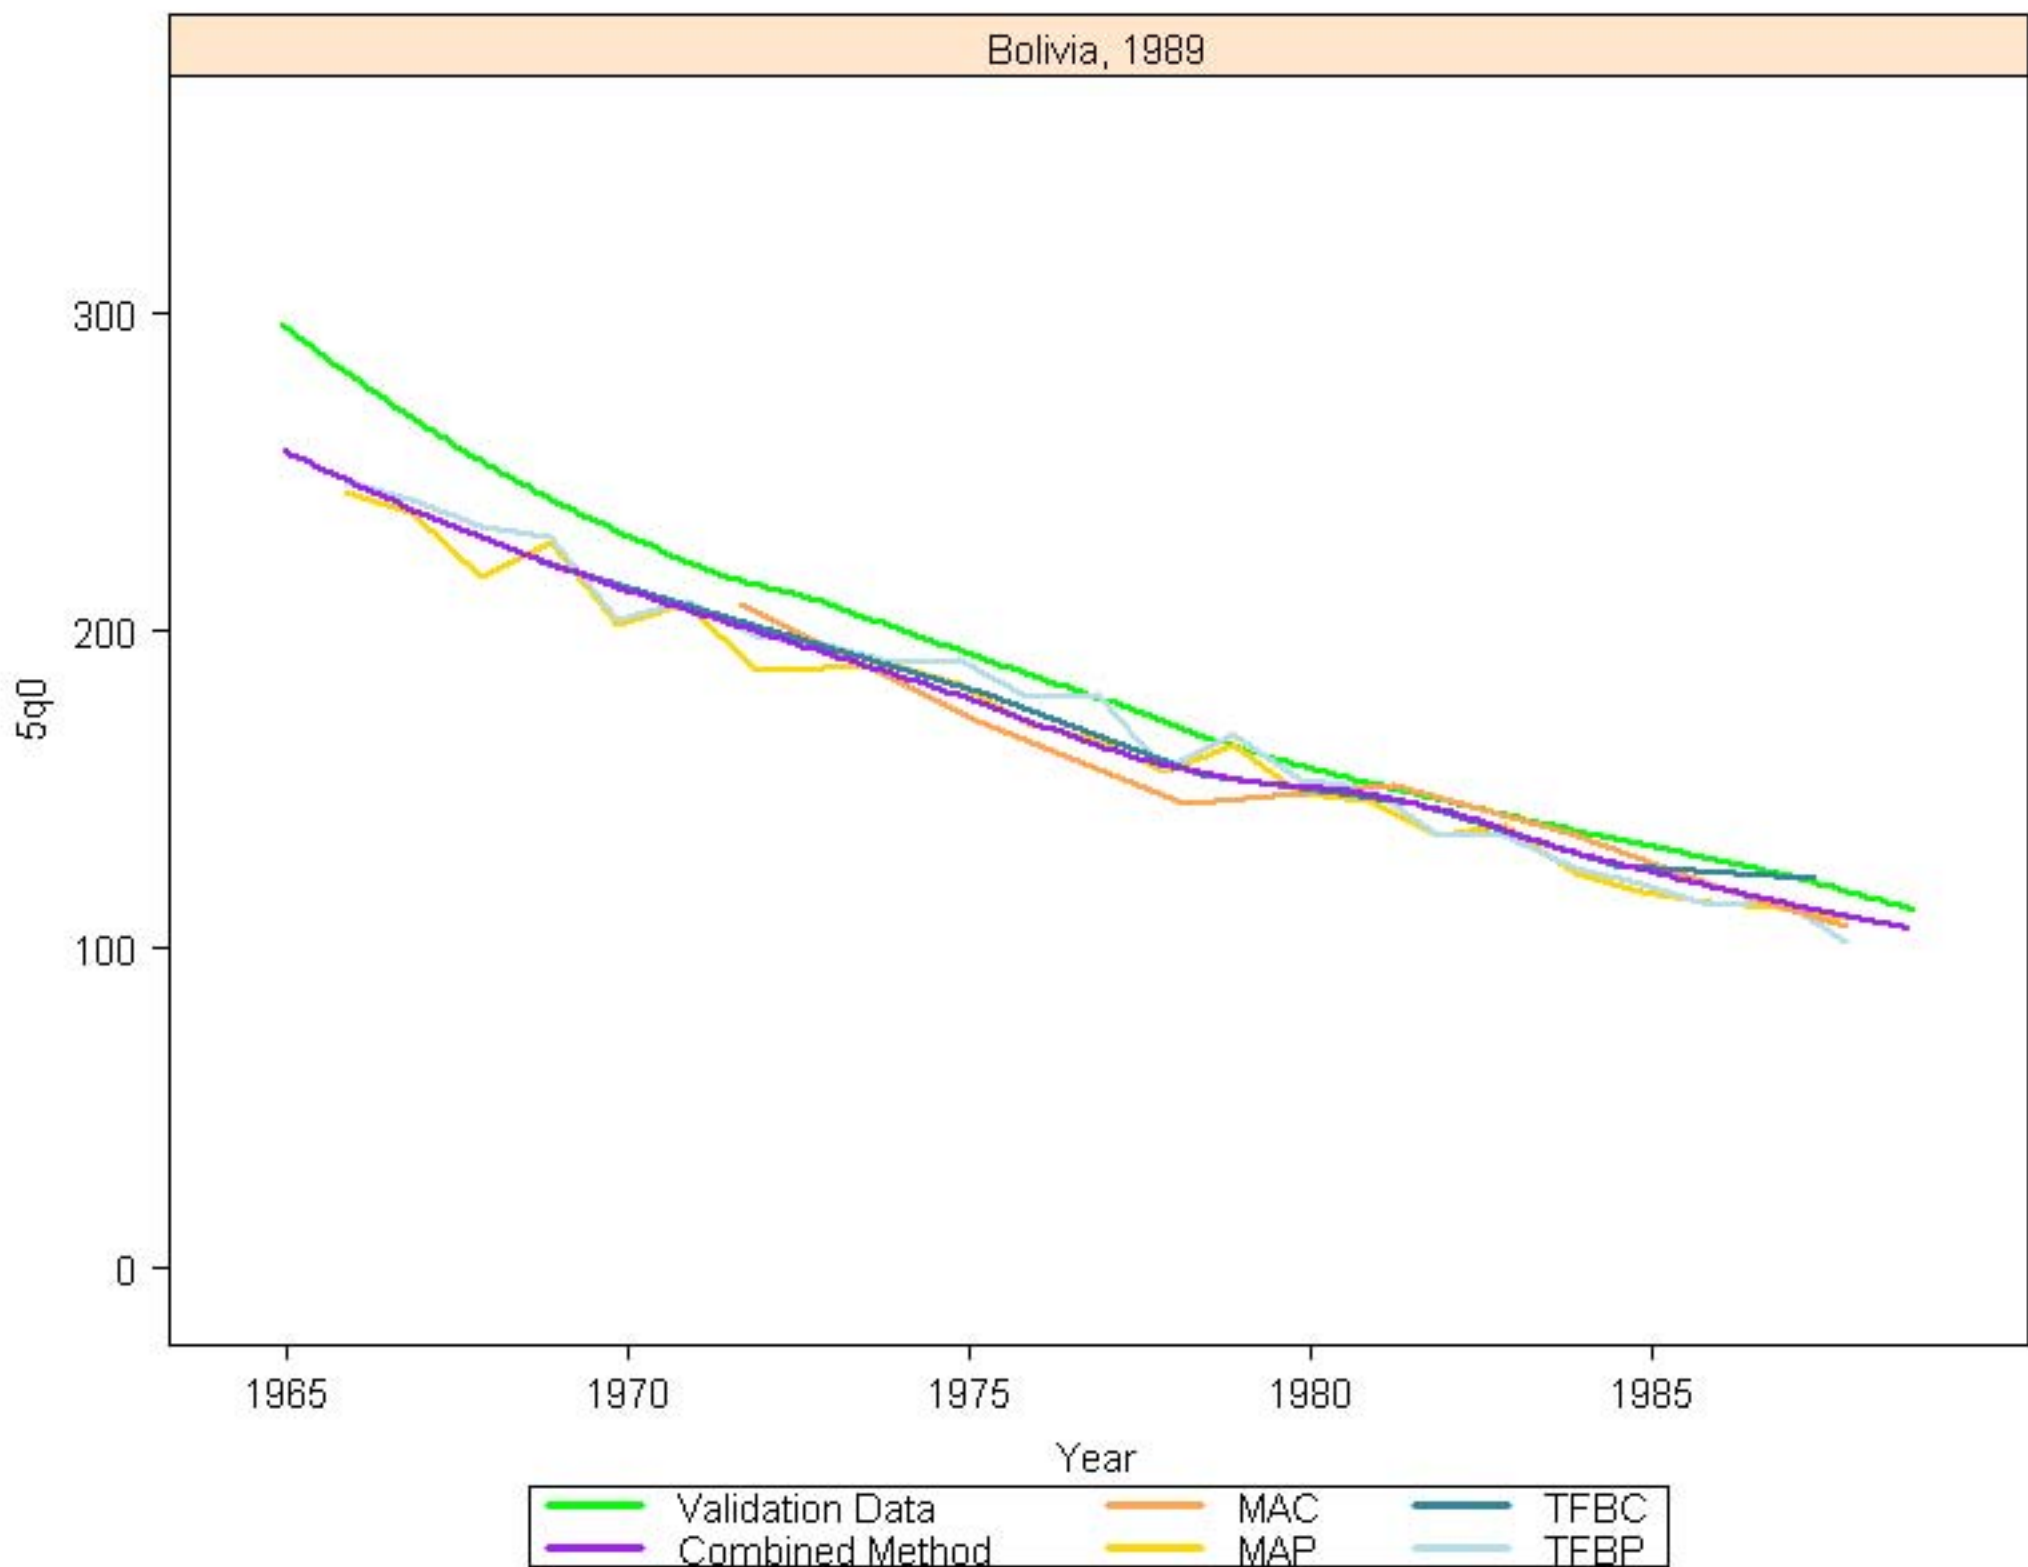

Bolivia, 1994

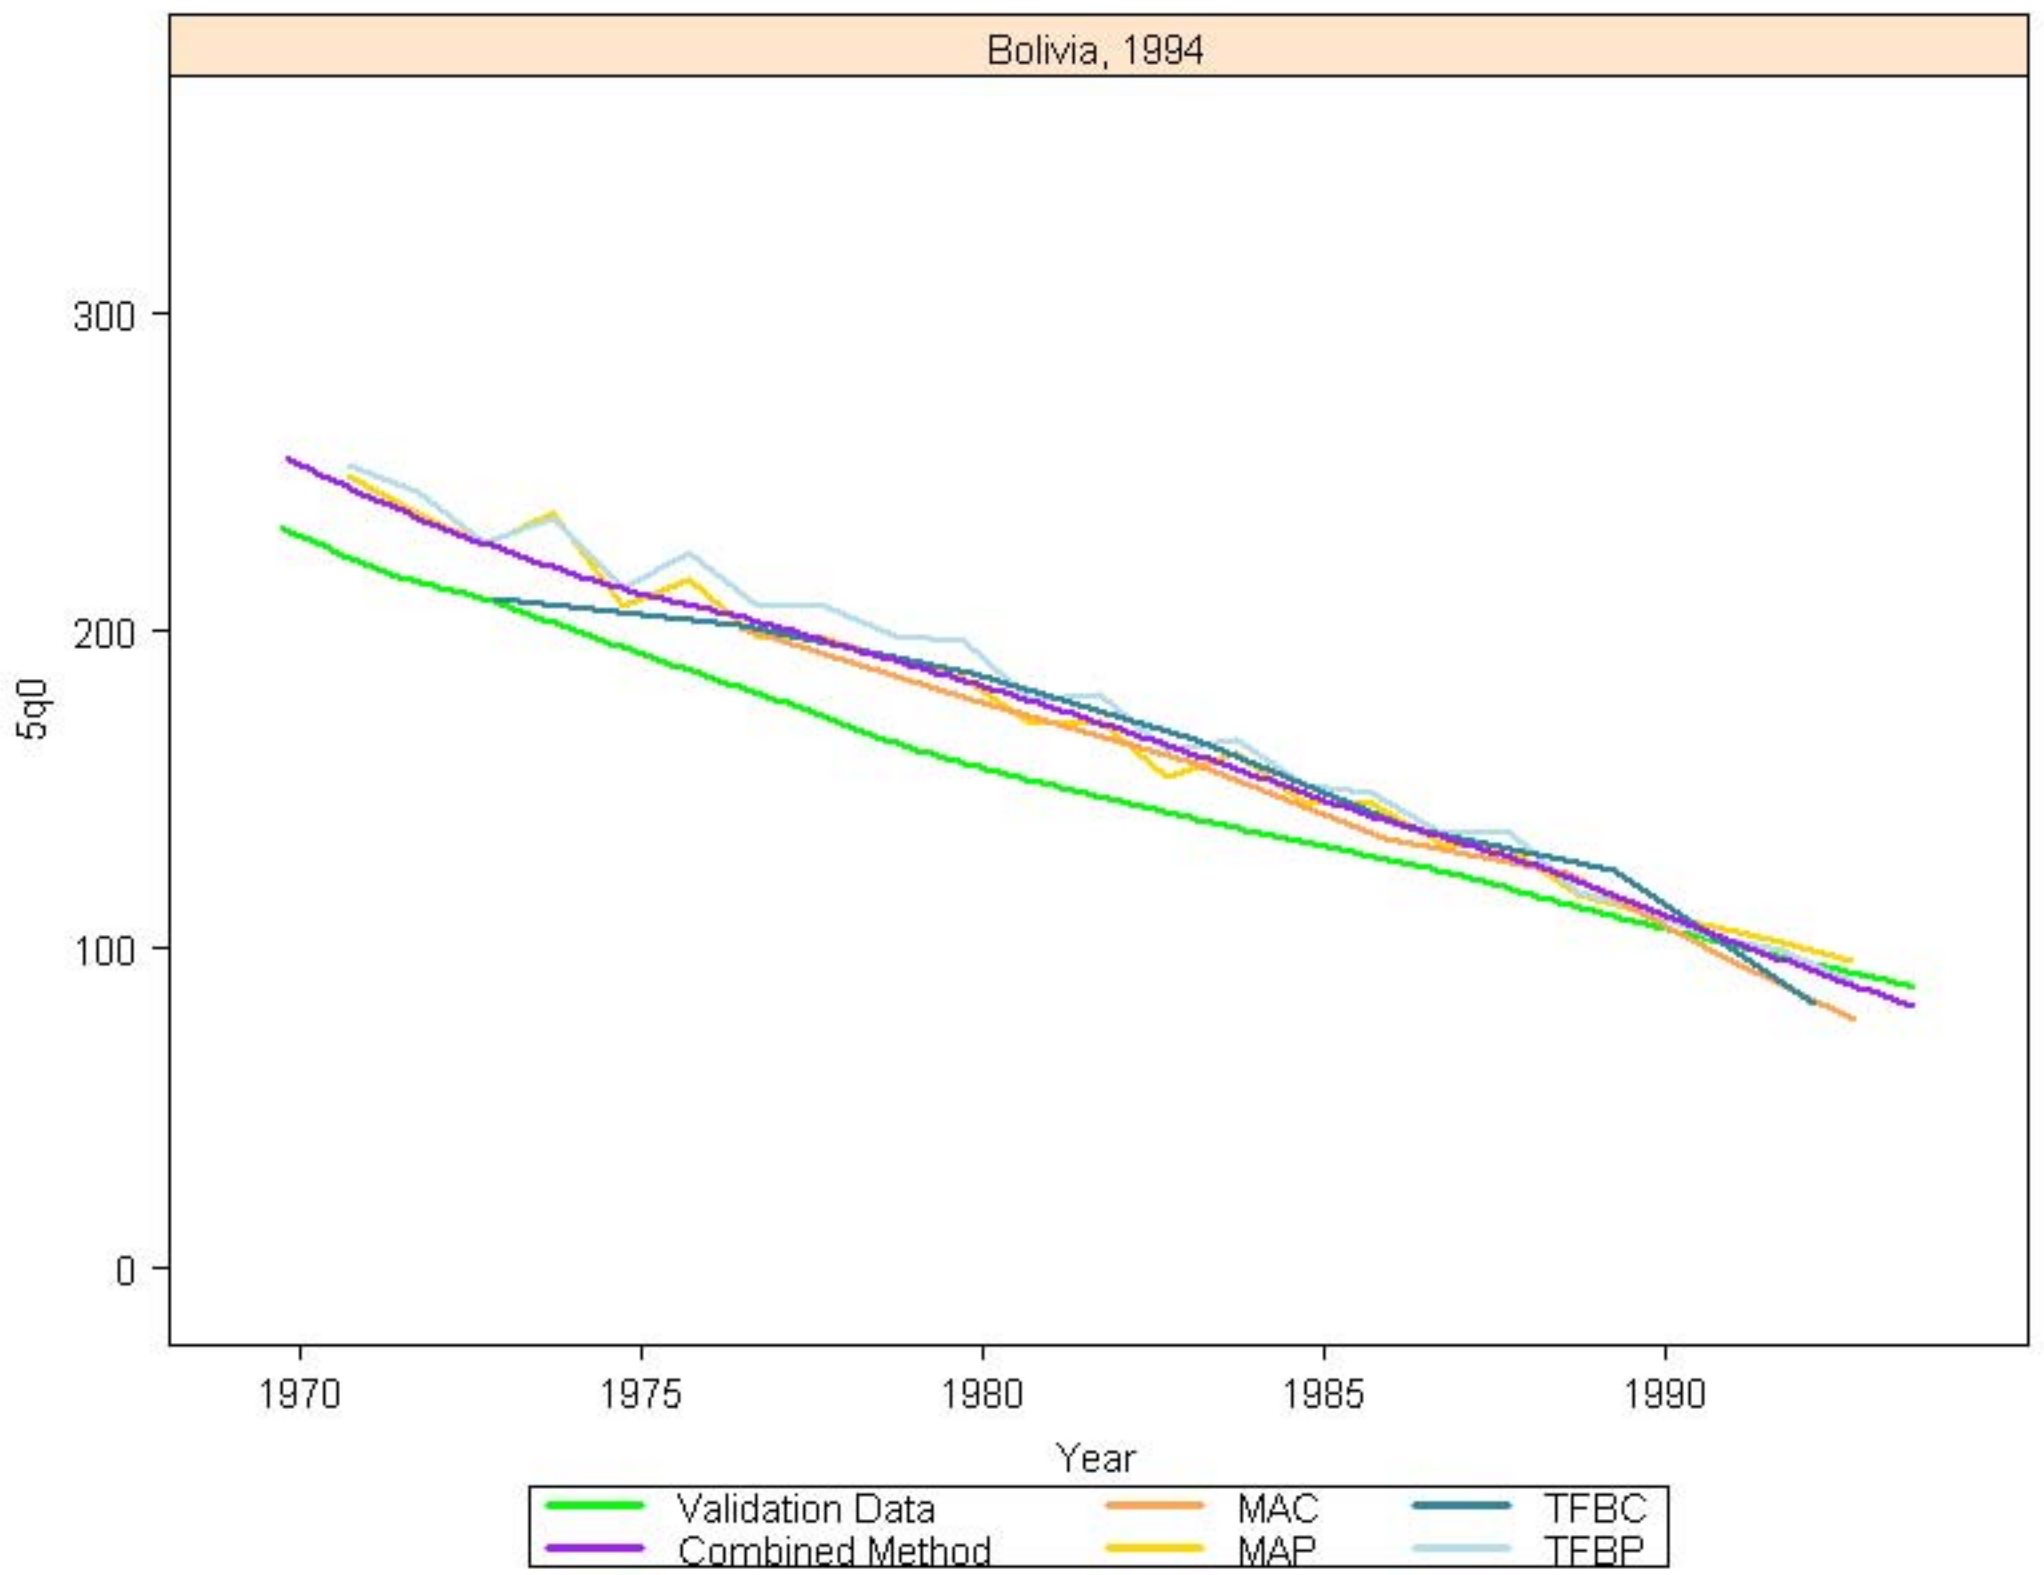

Bolivia, 1998

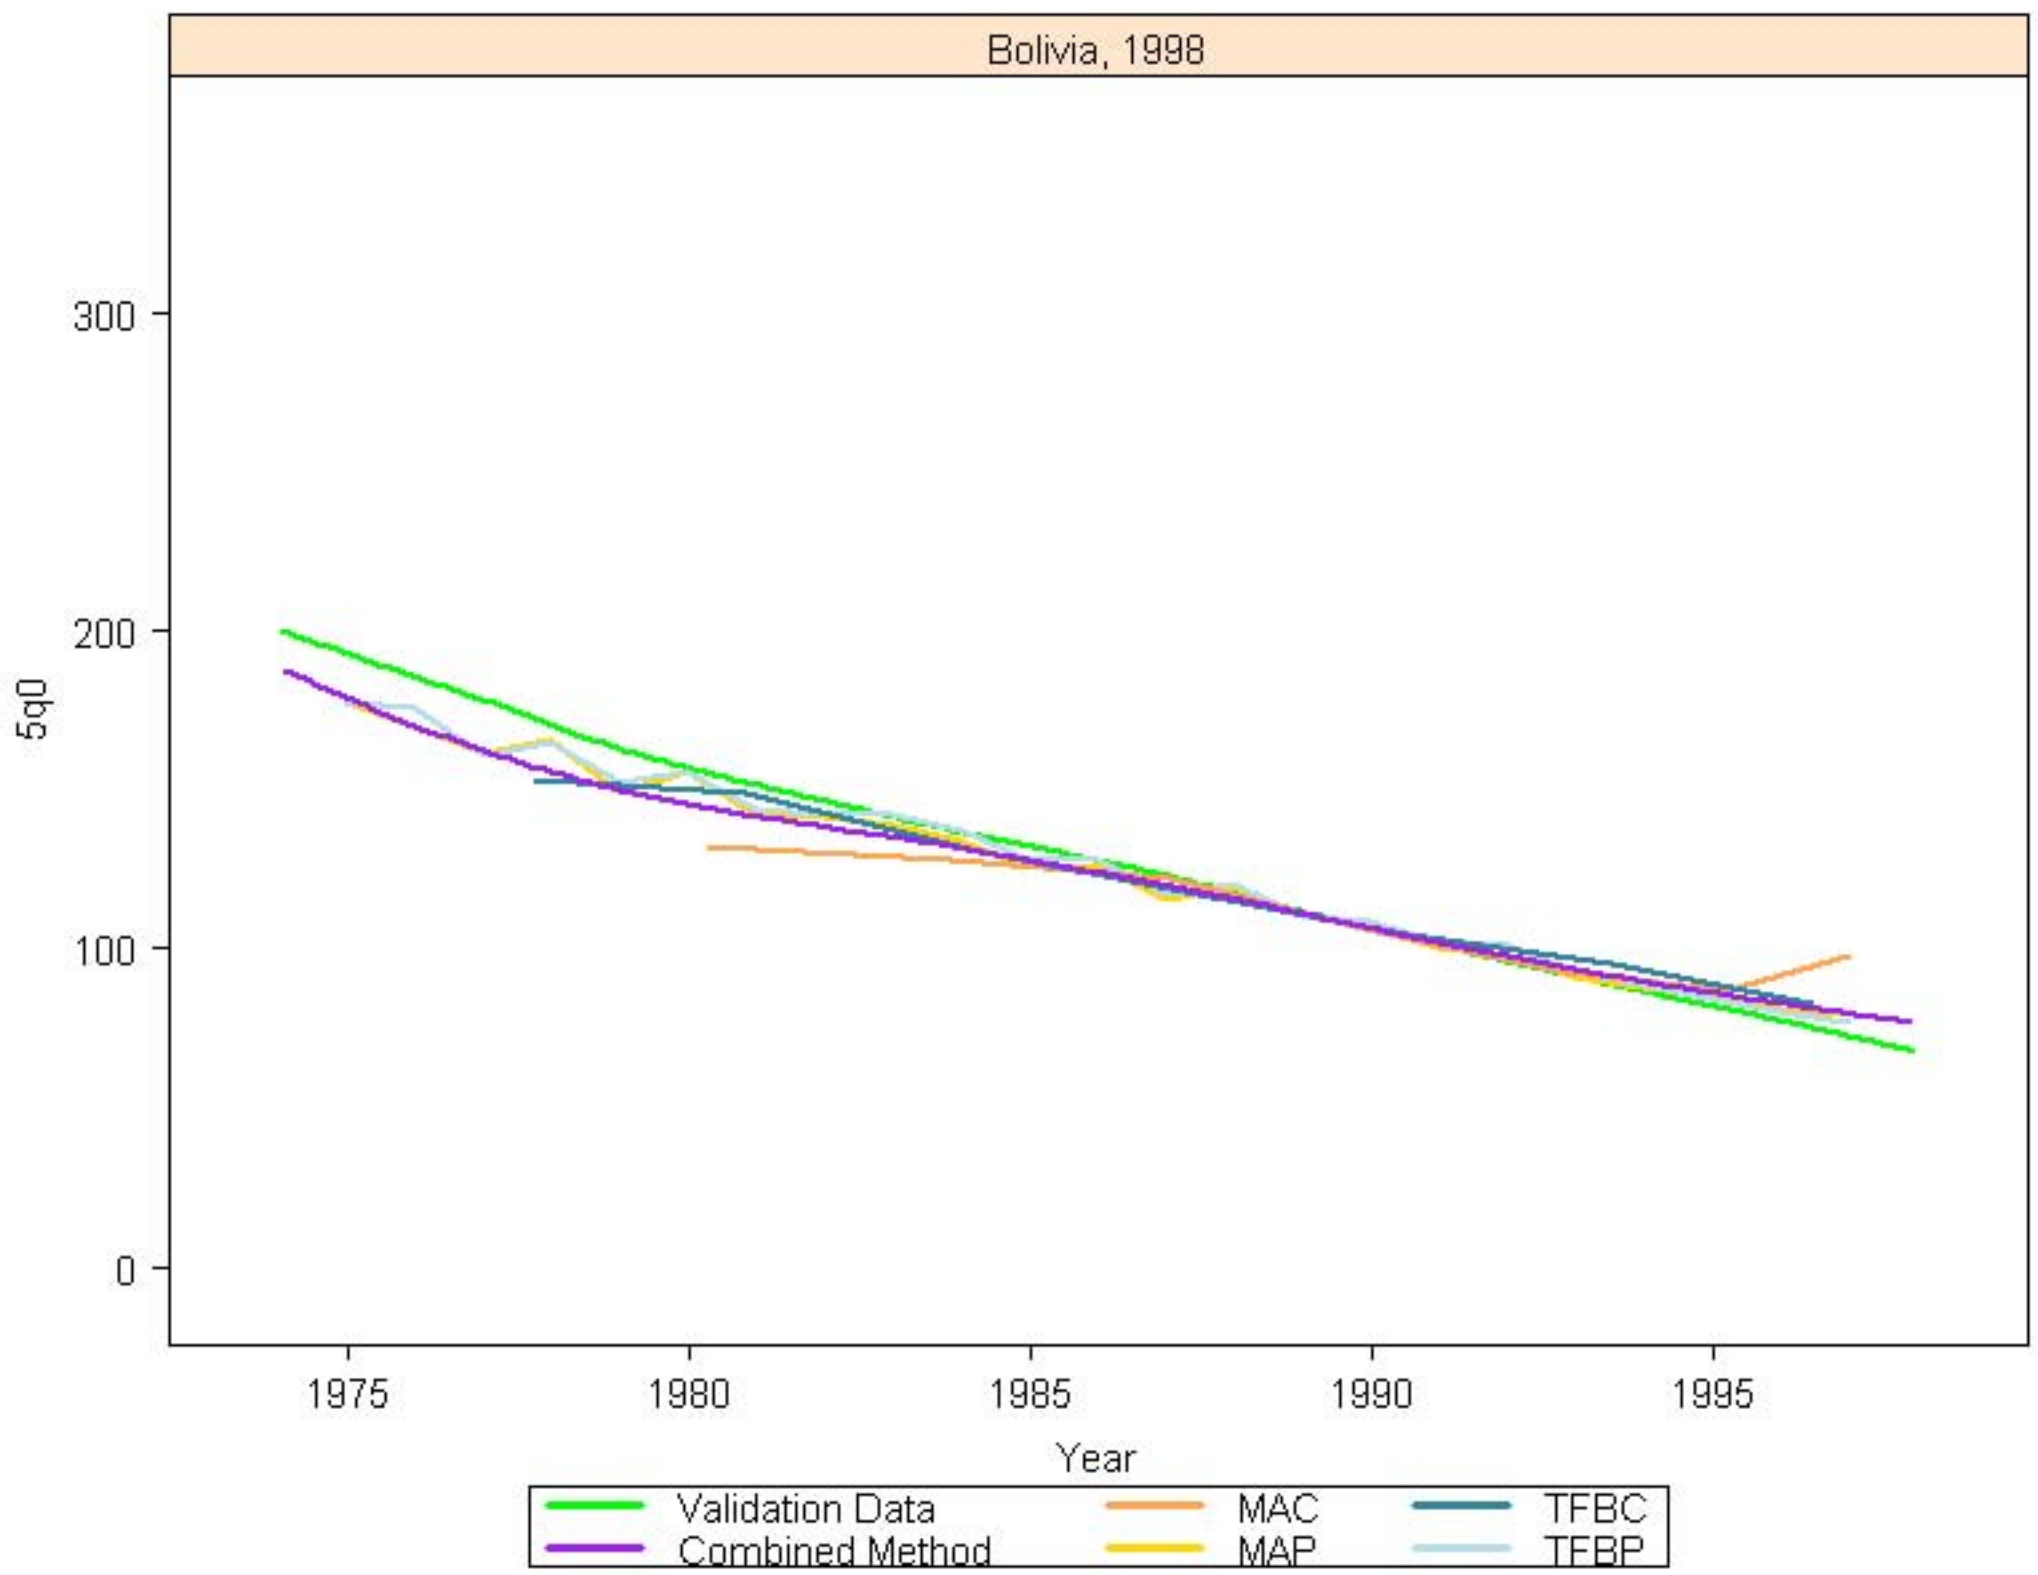

Bolivia, 2004

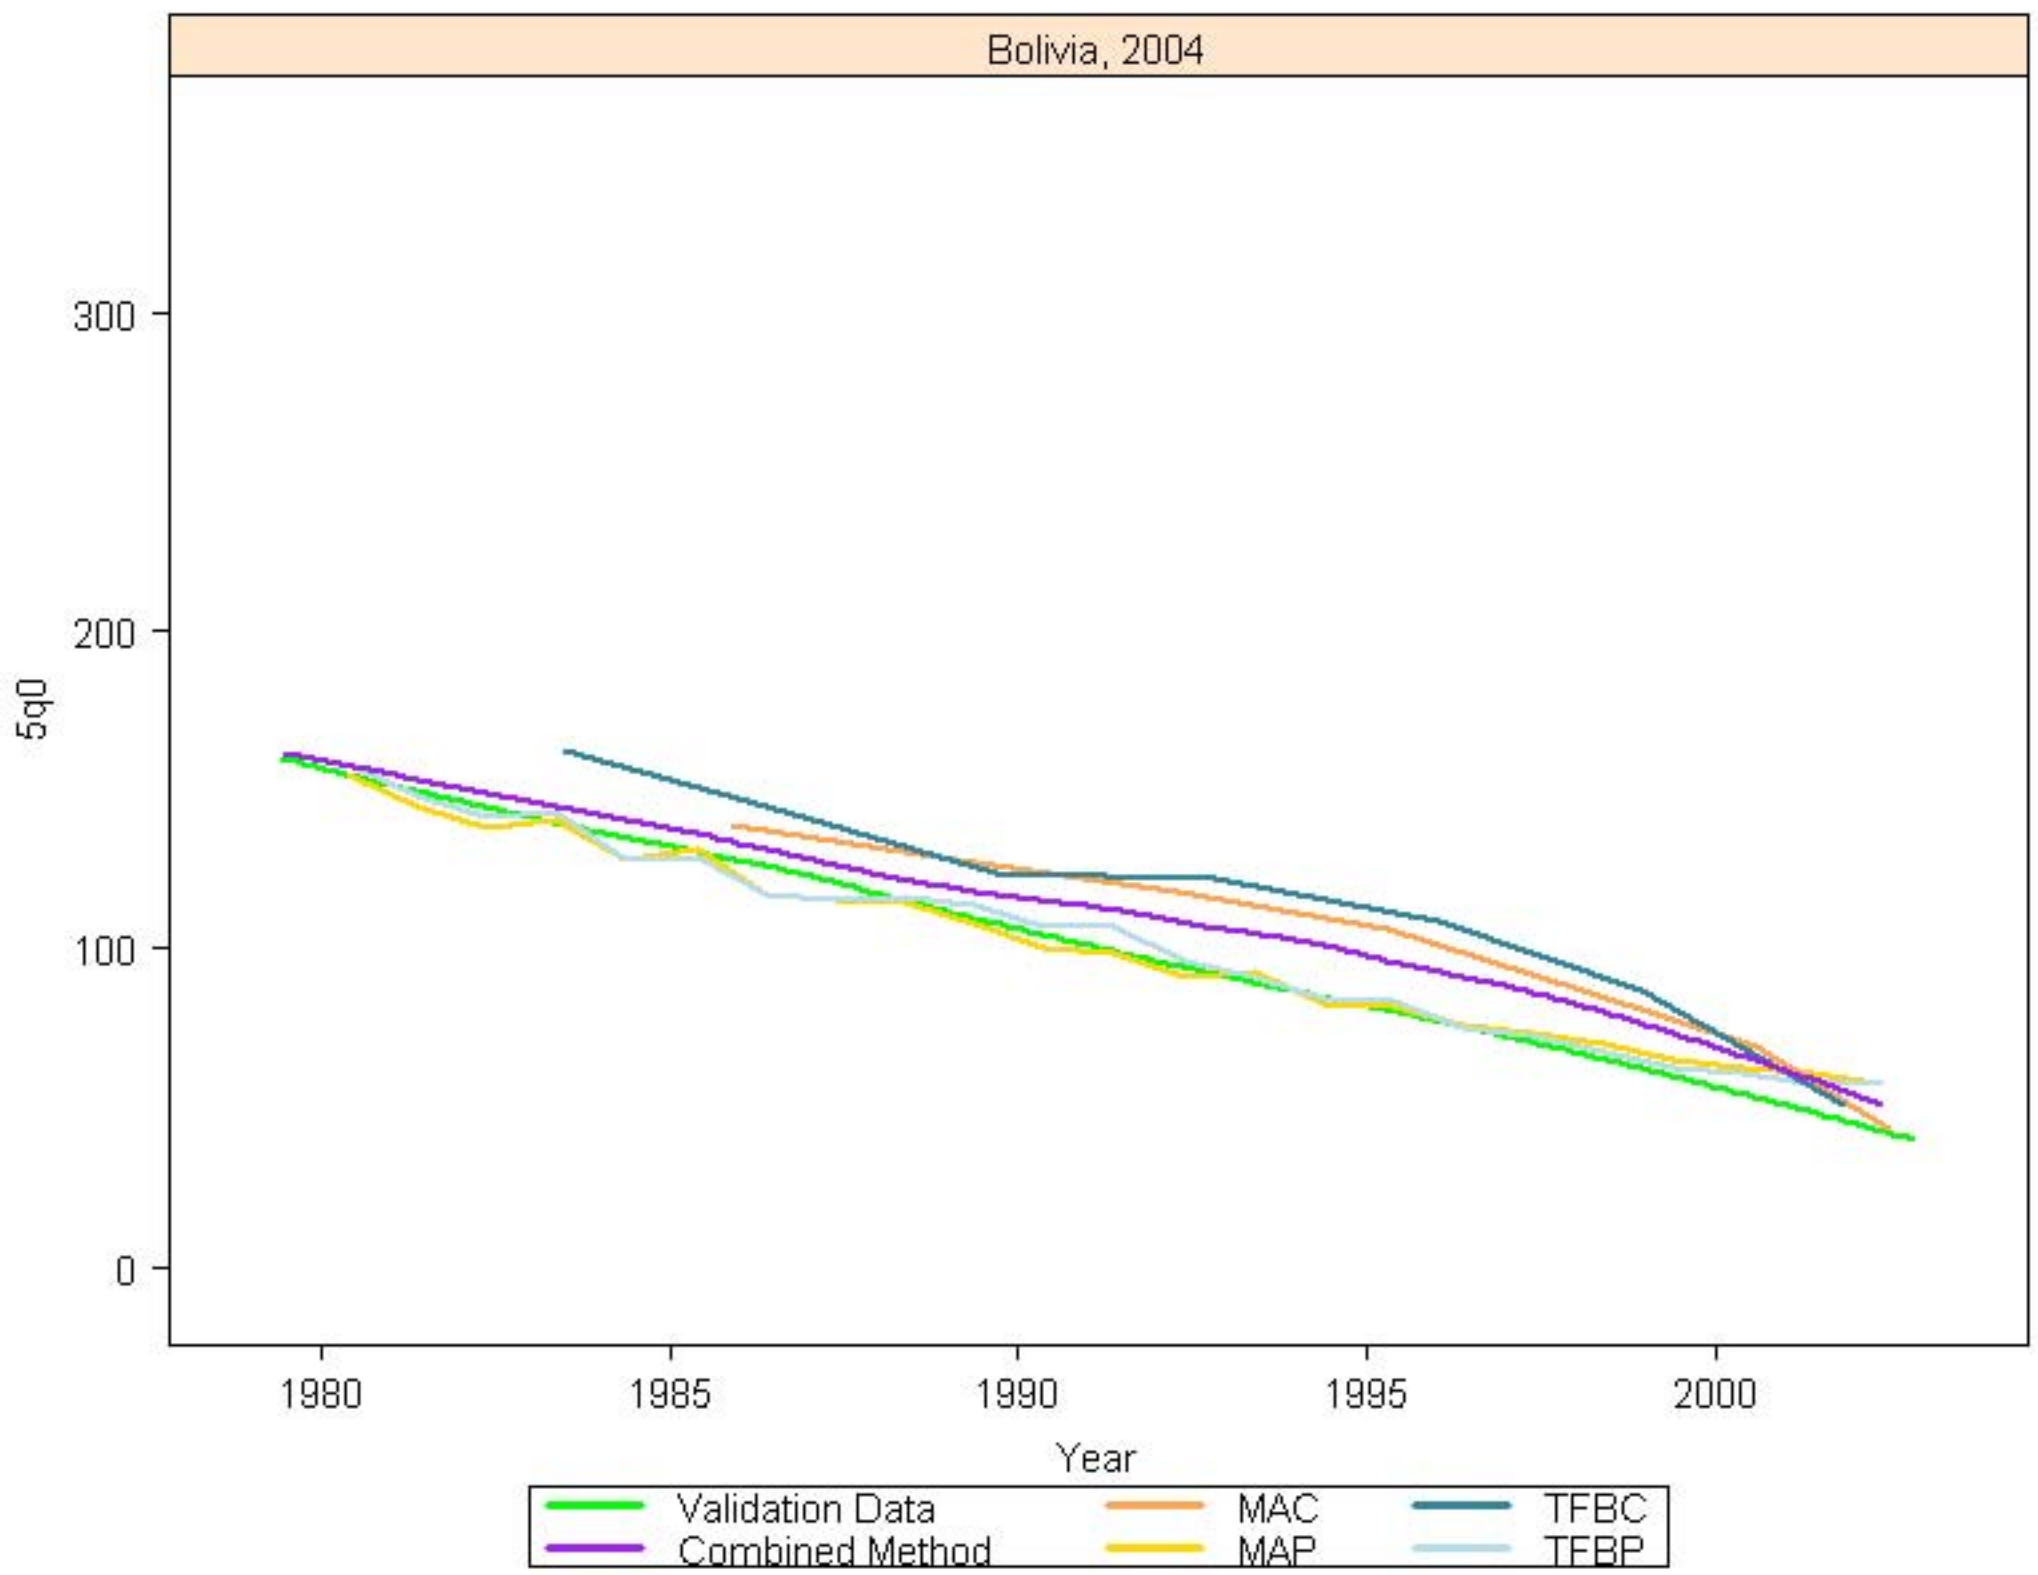

Botswana, 1989

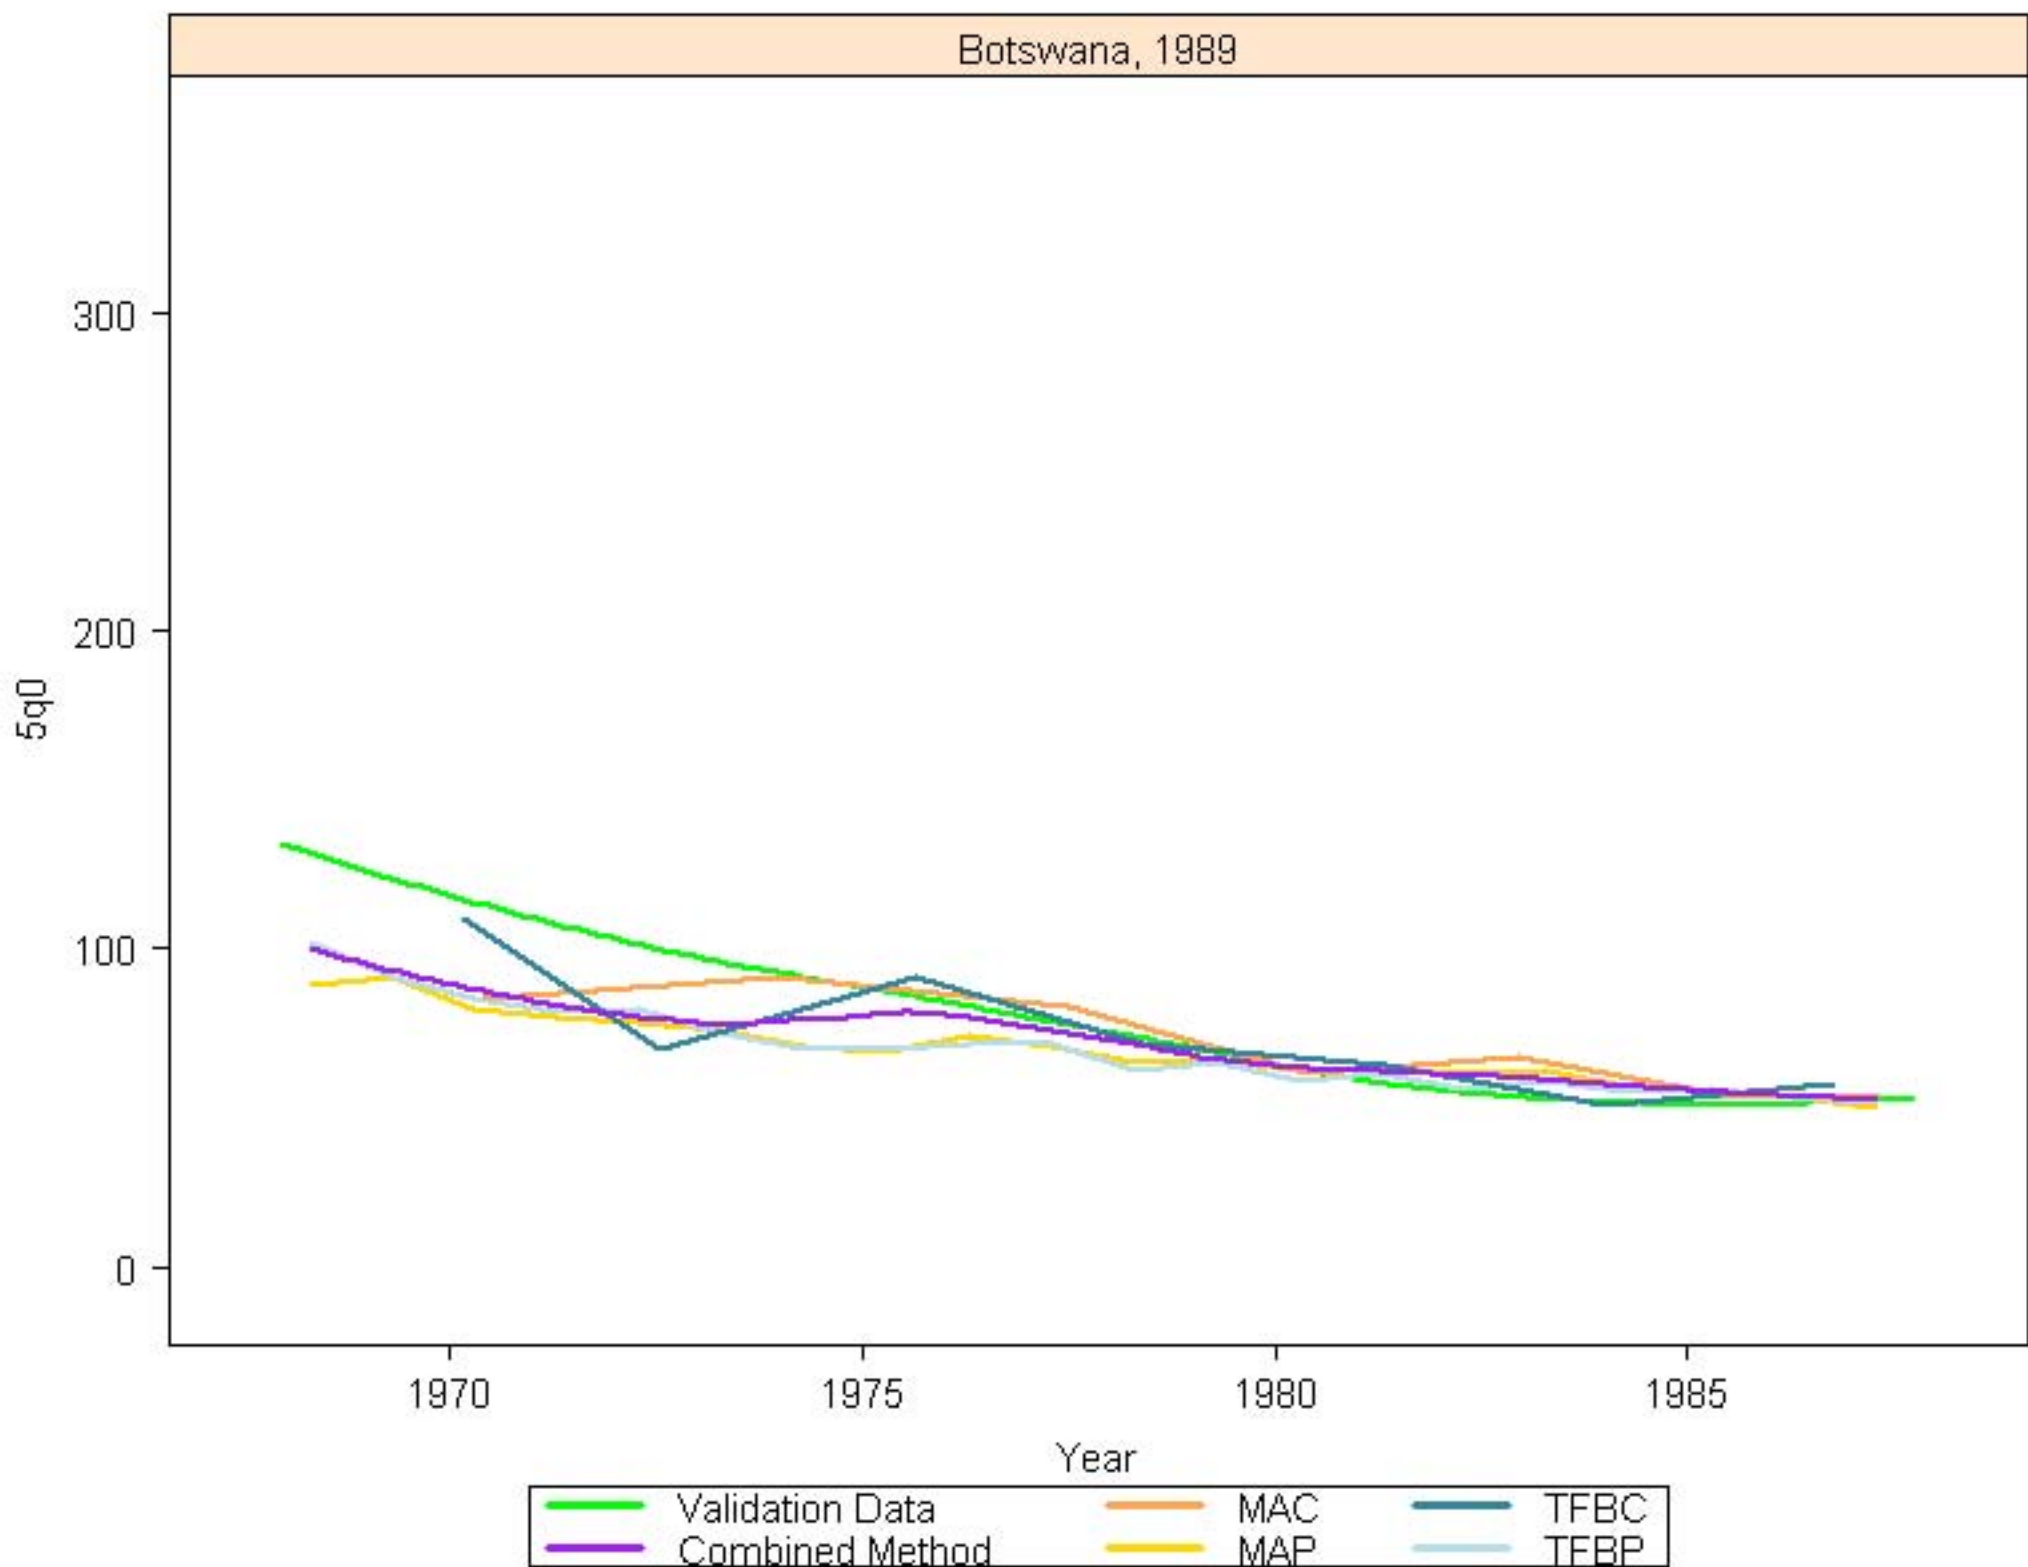

Brazil, 1987

5q0

300  
200  
100  
0

1965 1970 1975 1980 1985

Year

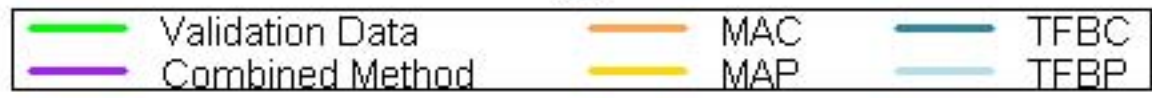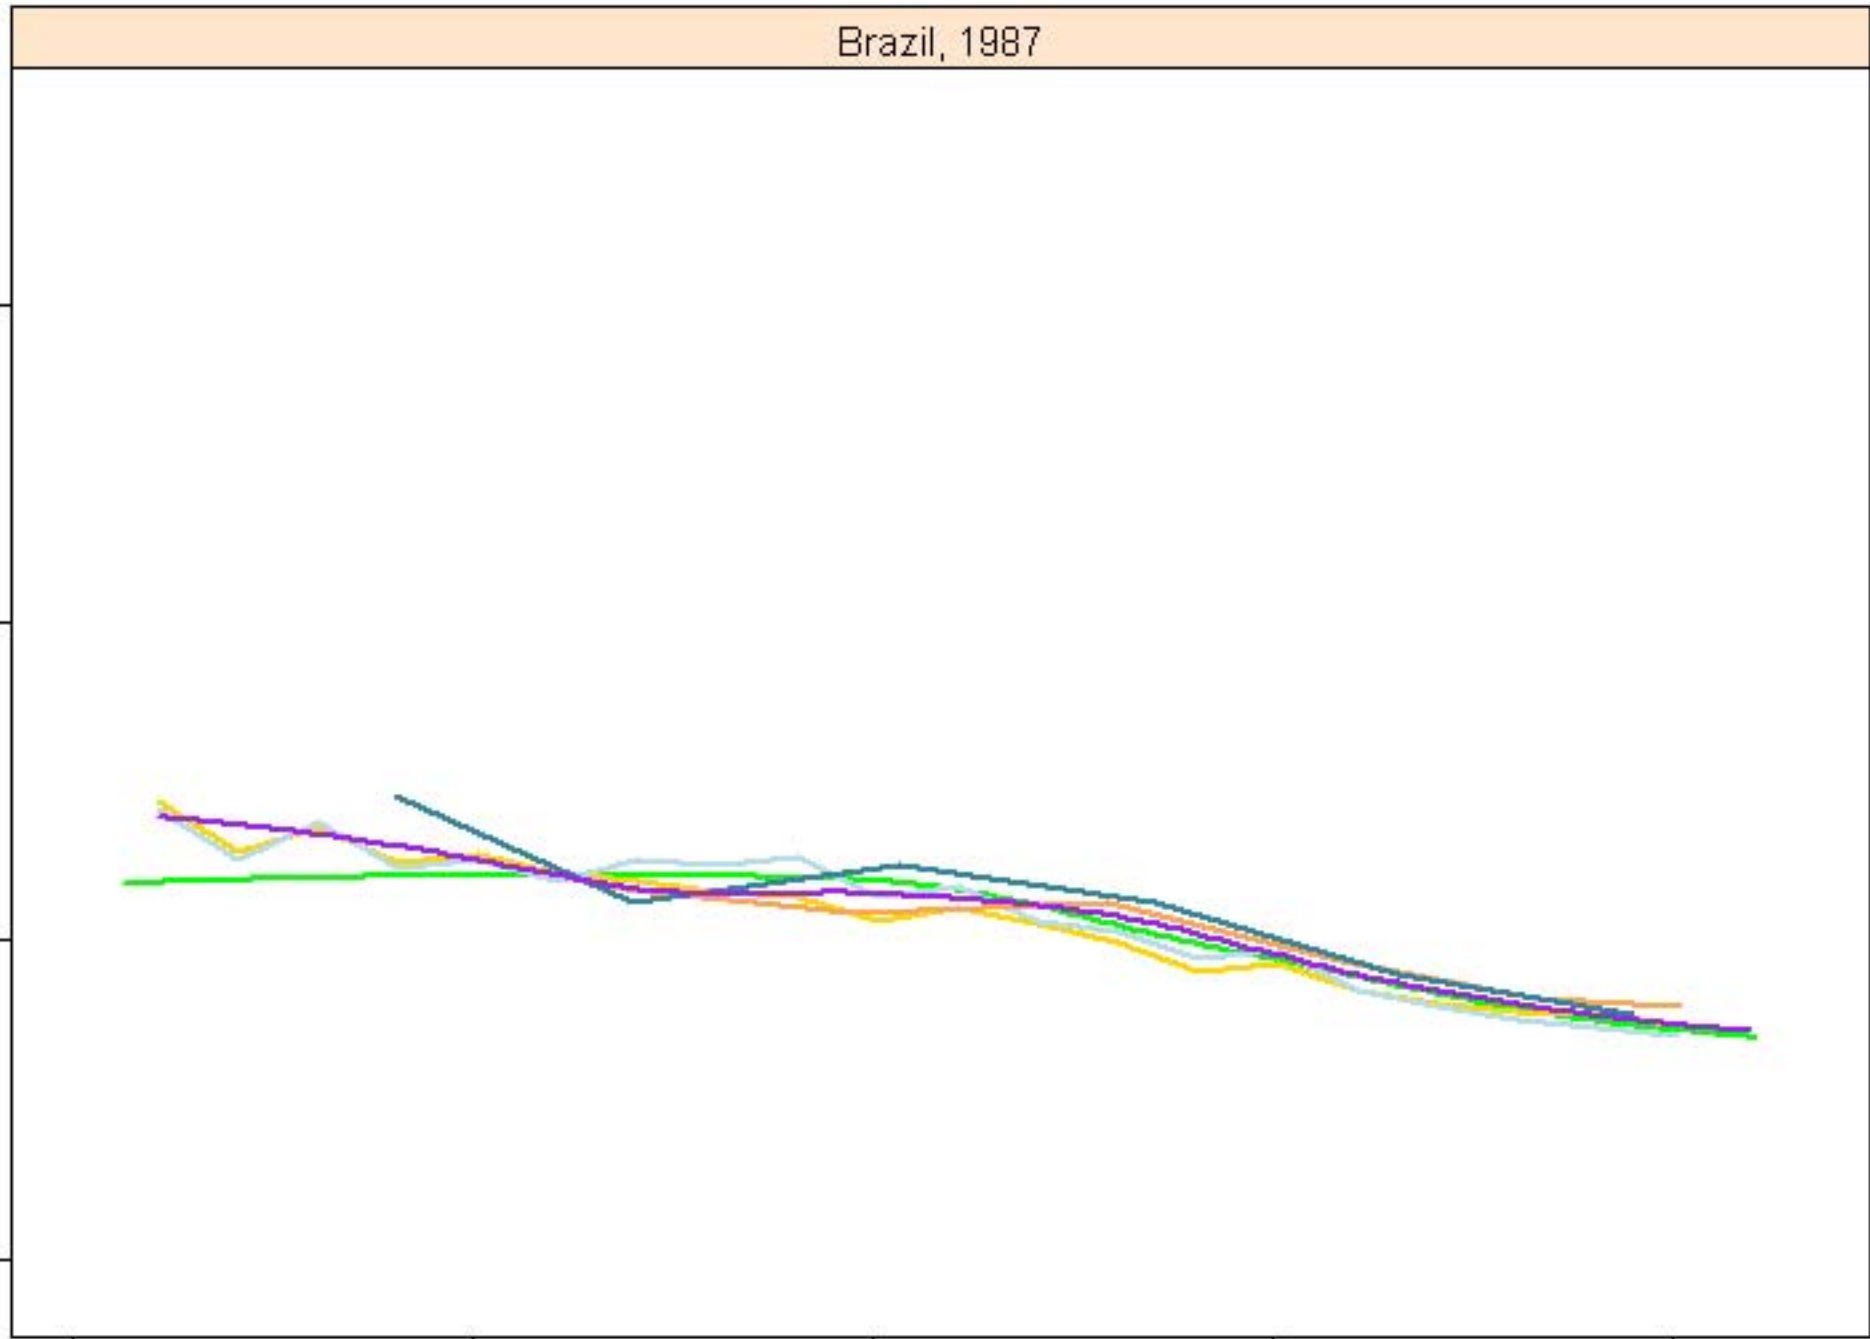



Brazil, 1996

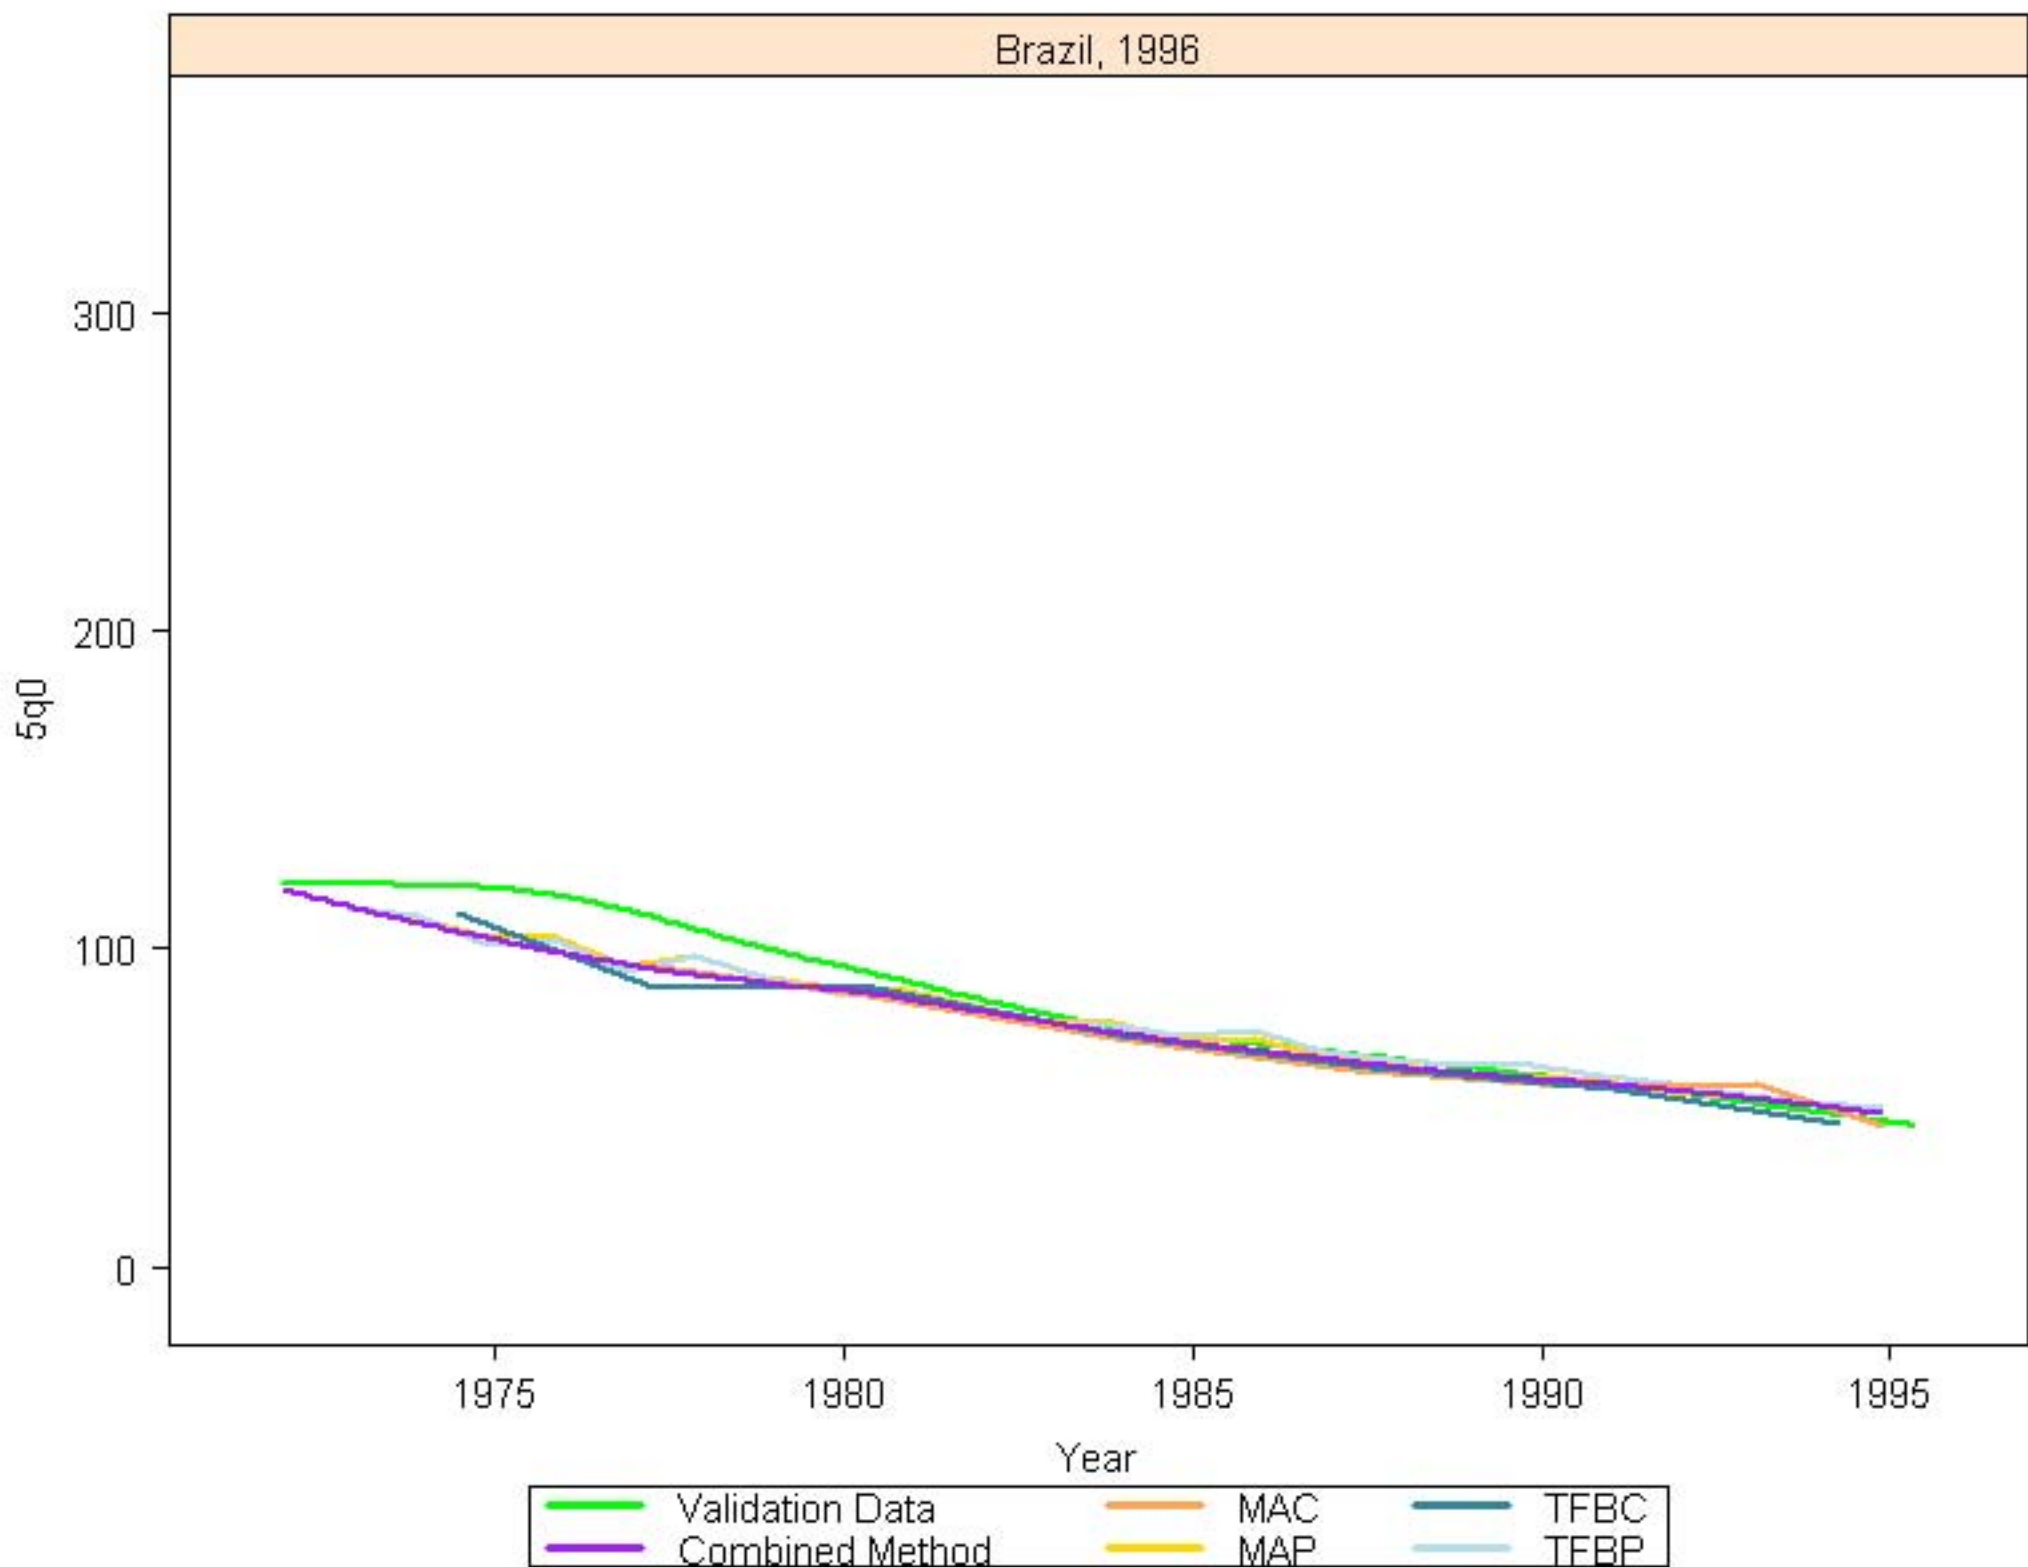

Burkina Faso, 1993

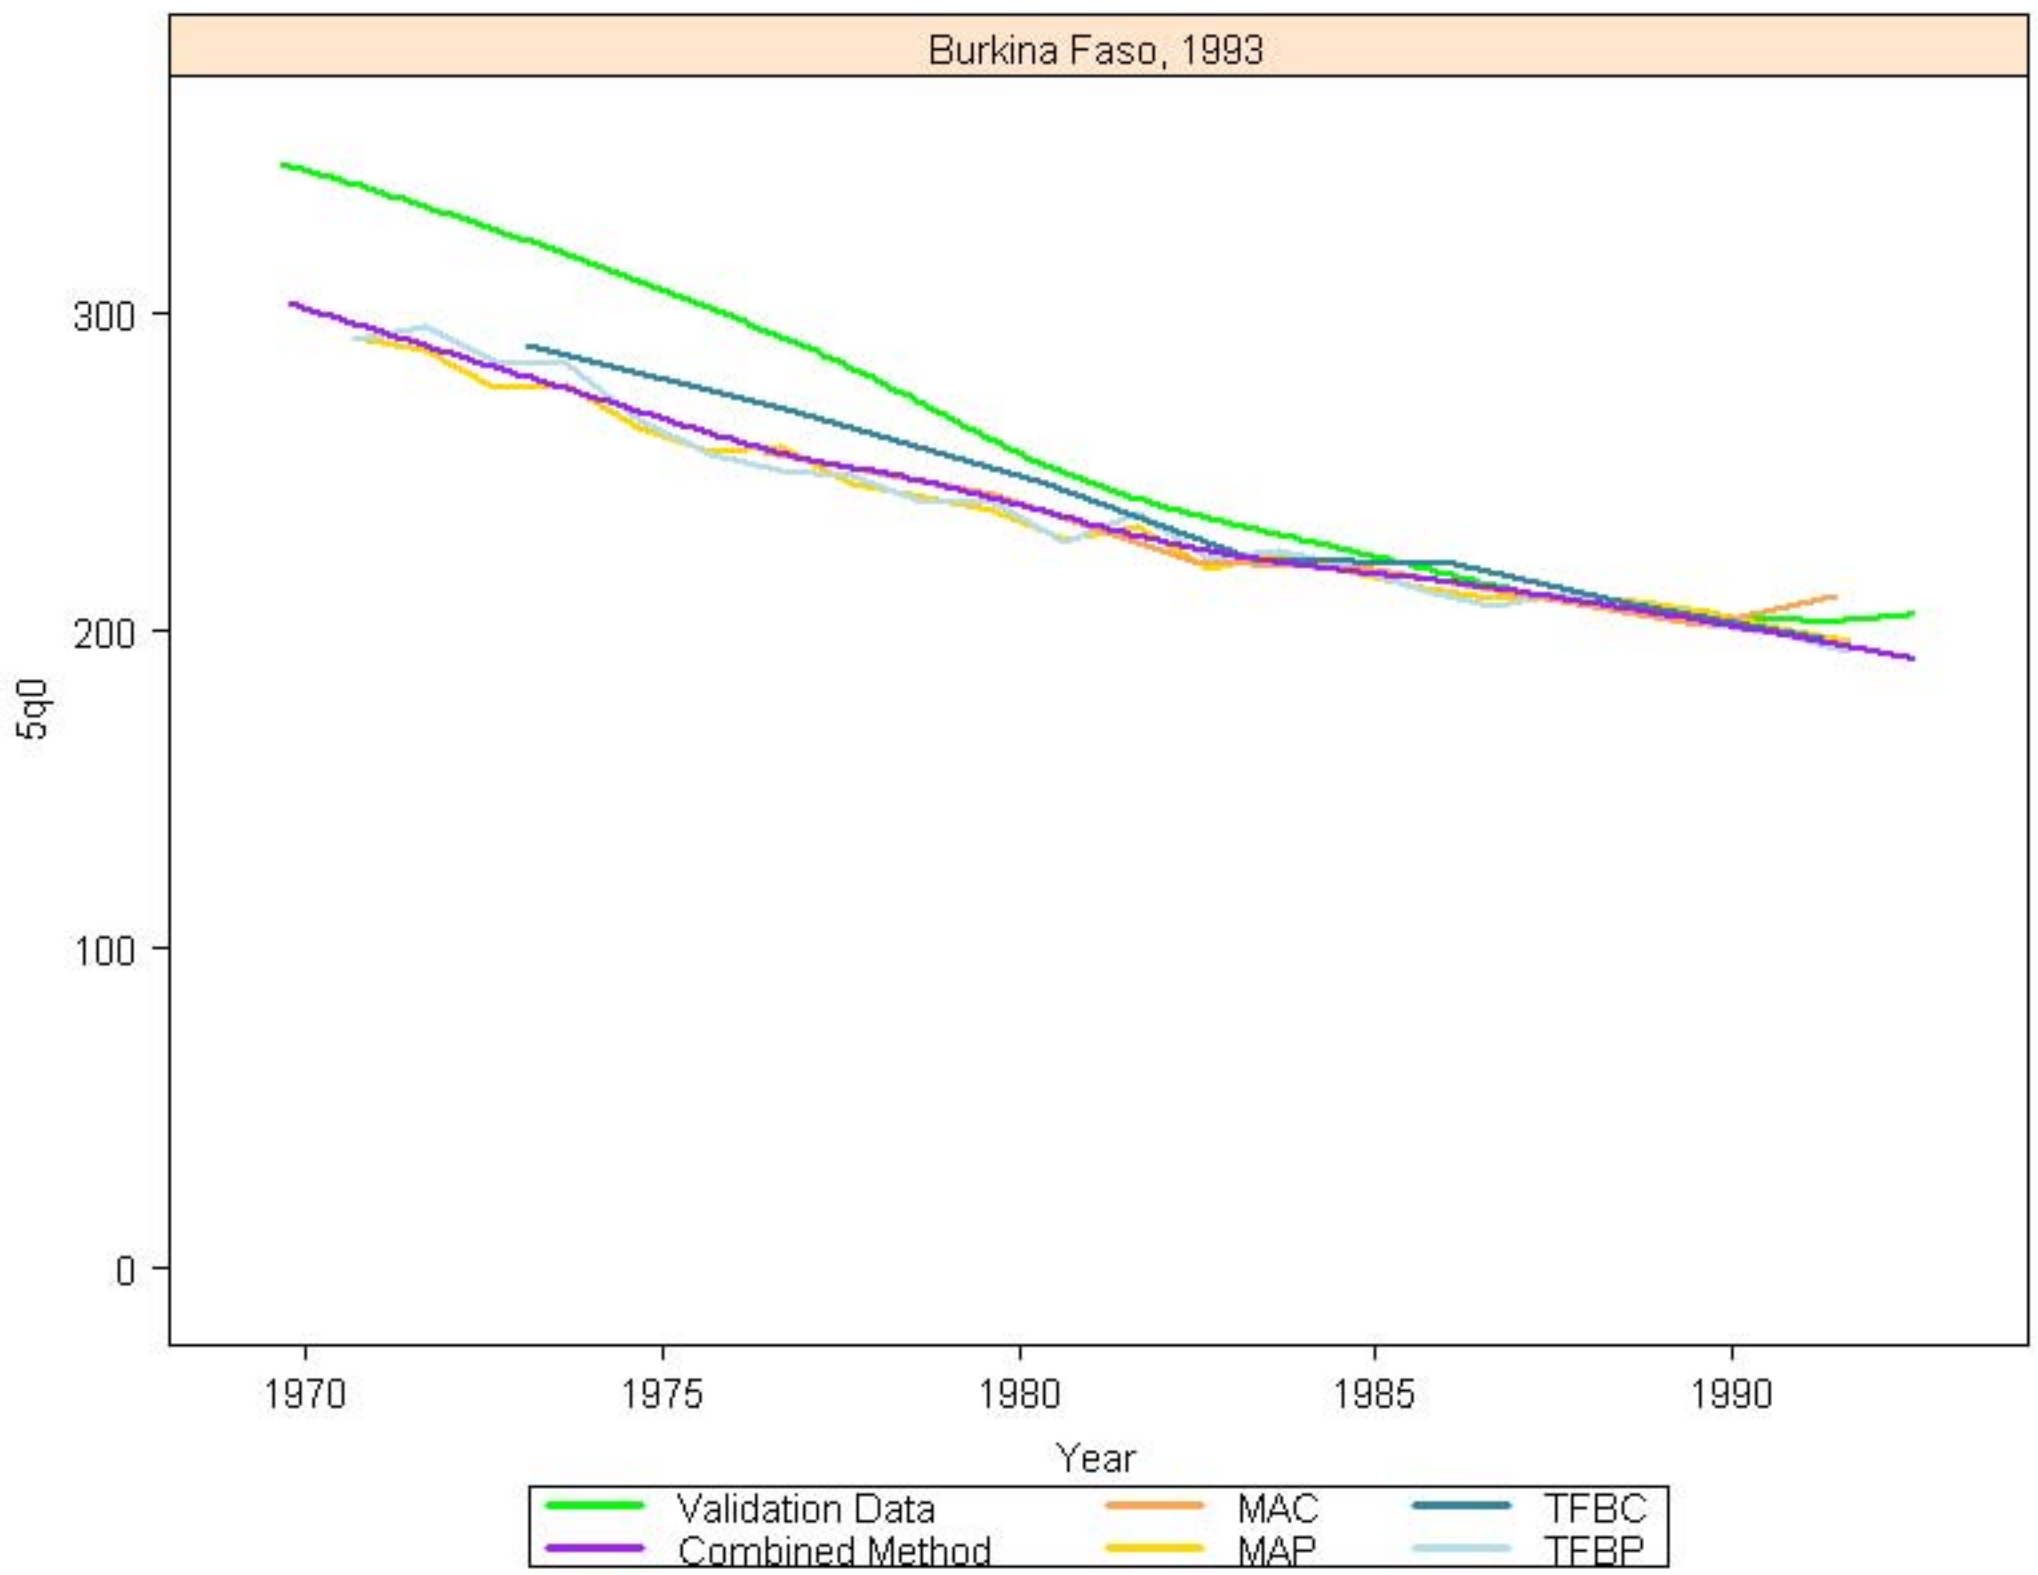

Burkina Faso, 1999

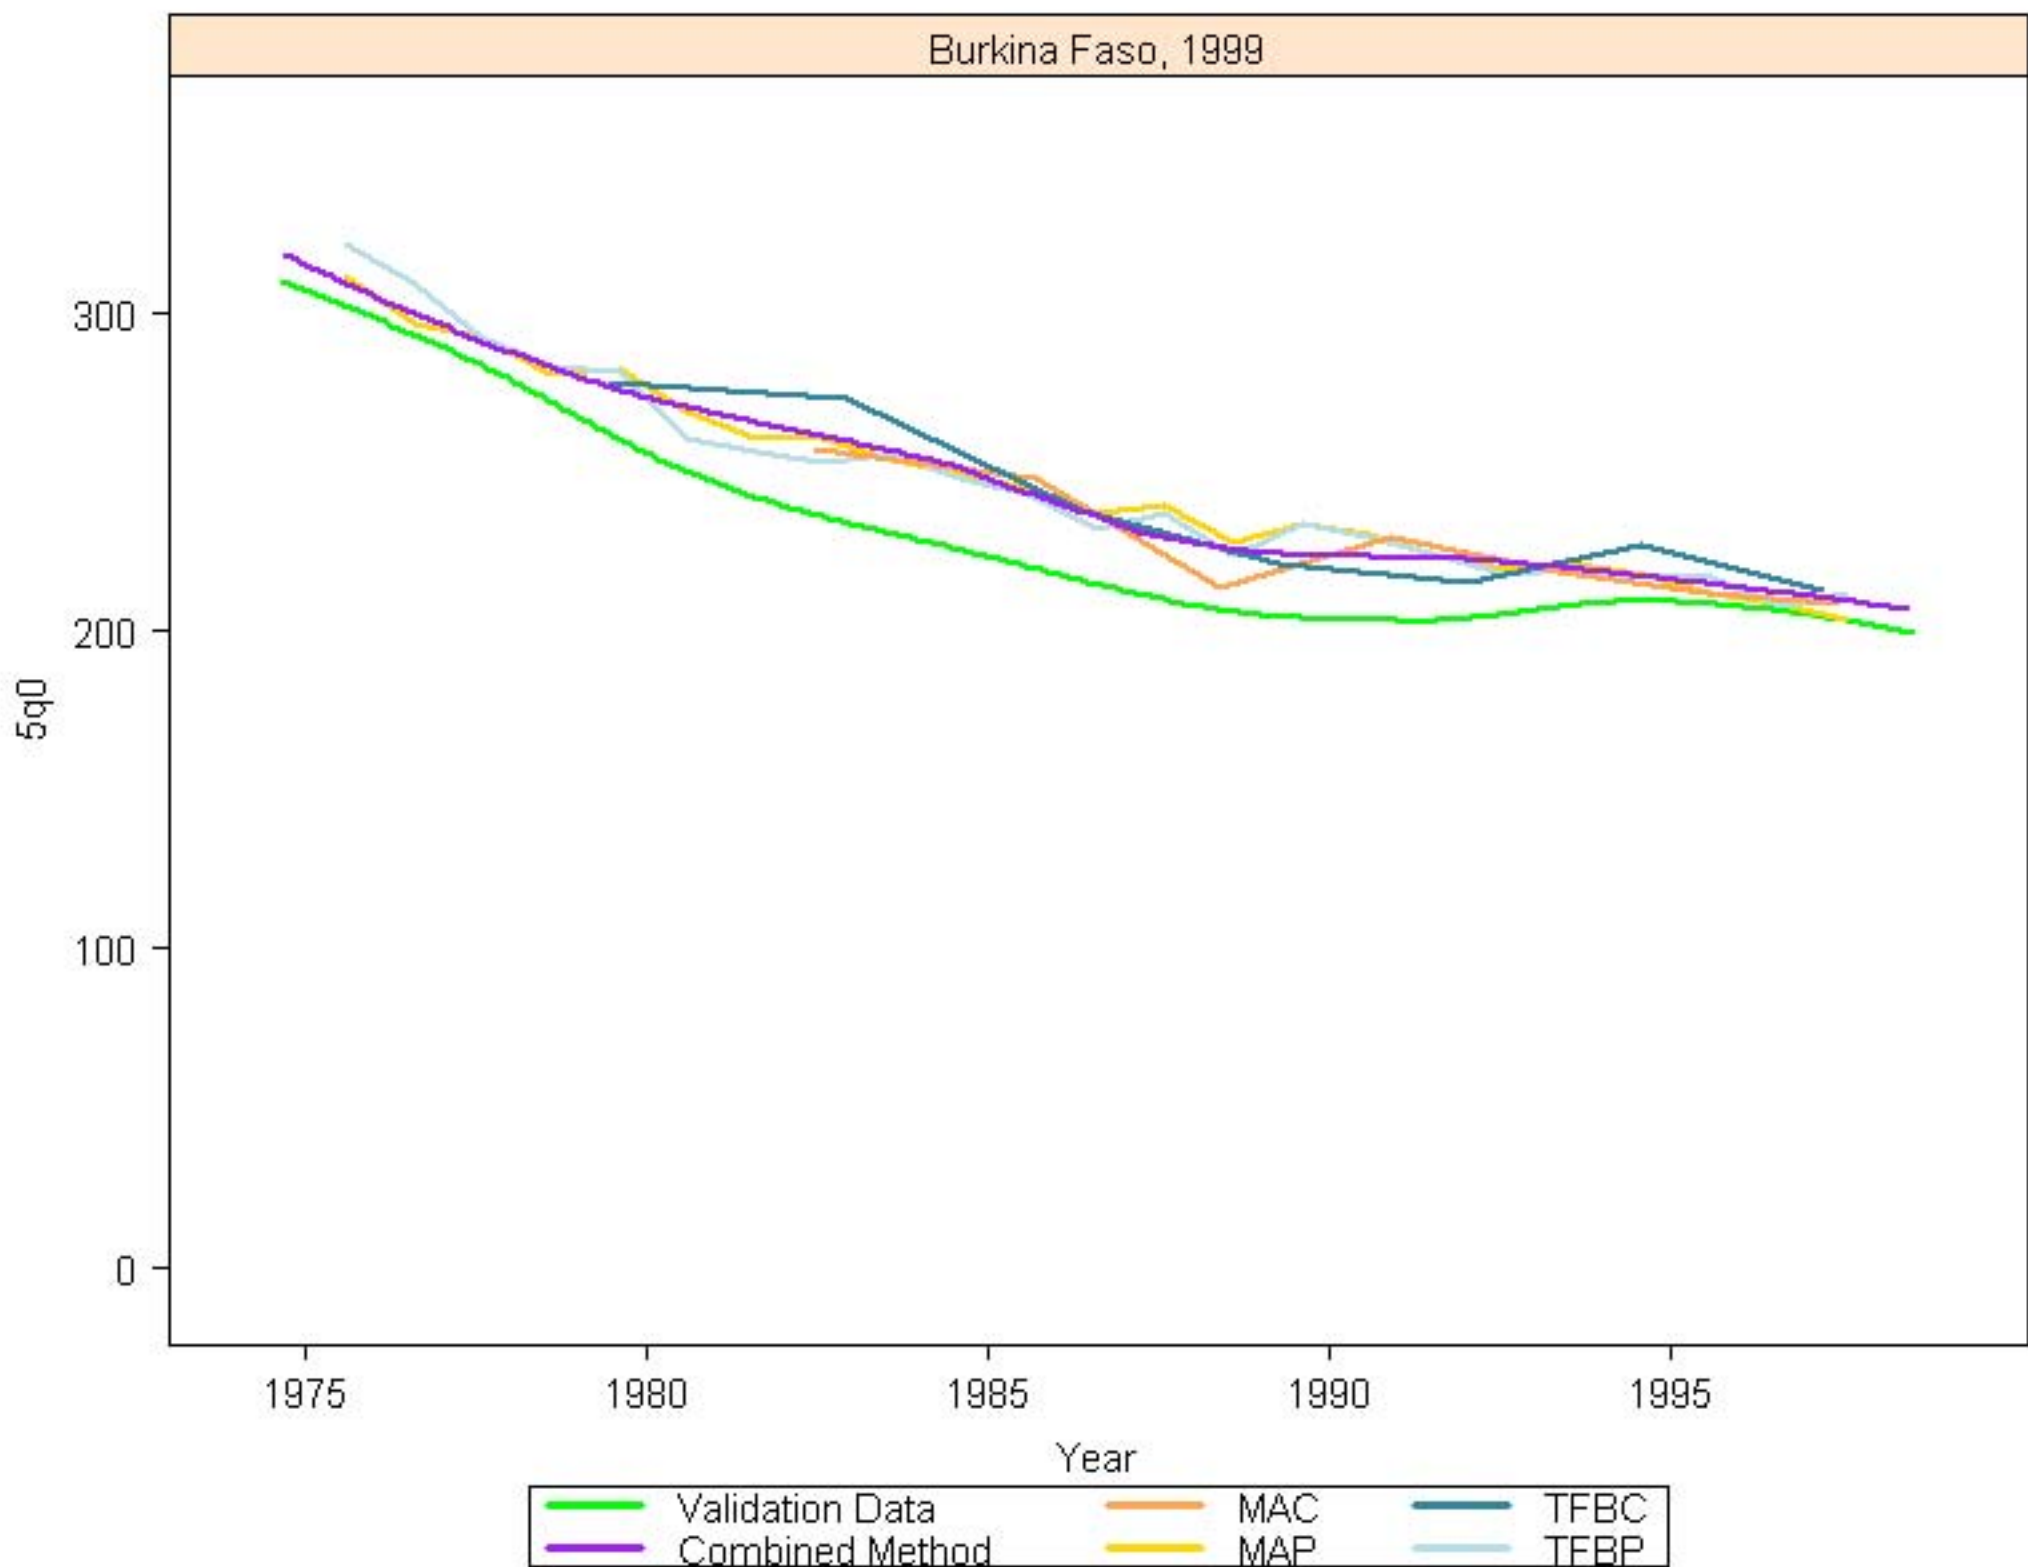

Burkina Faso, 2004

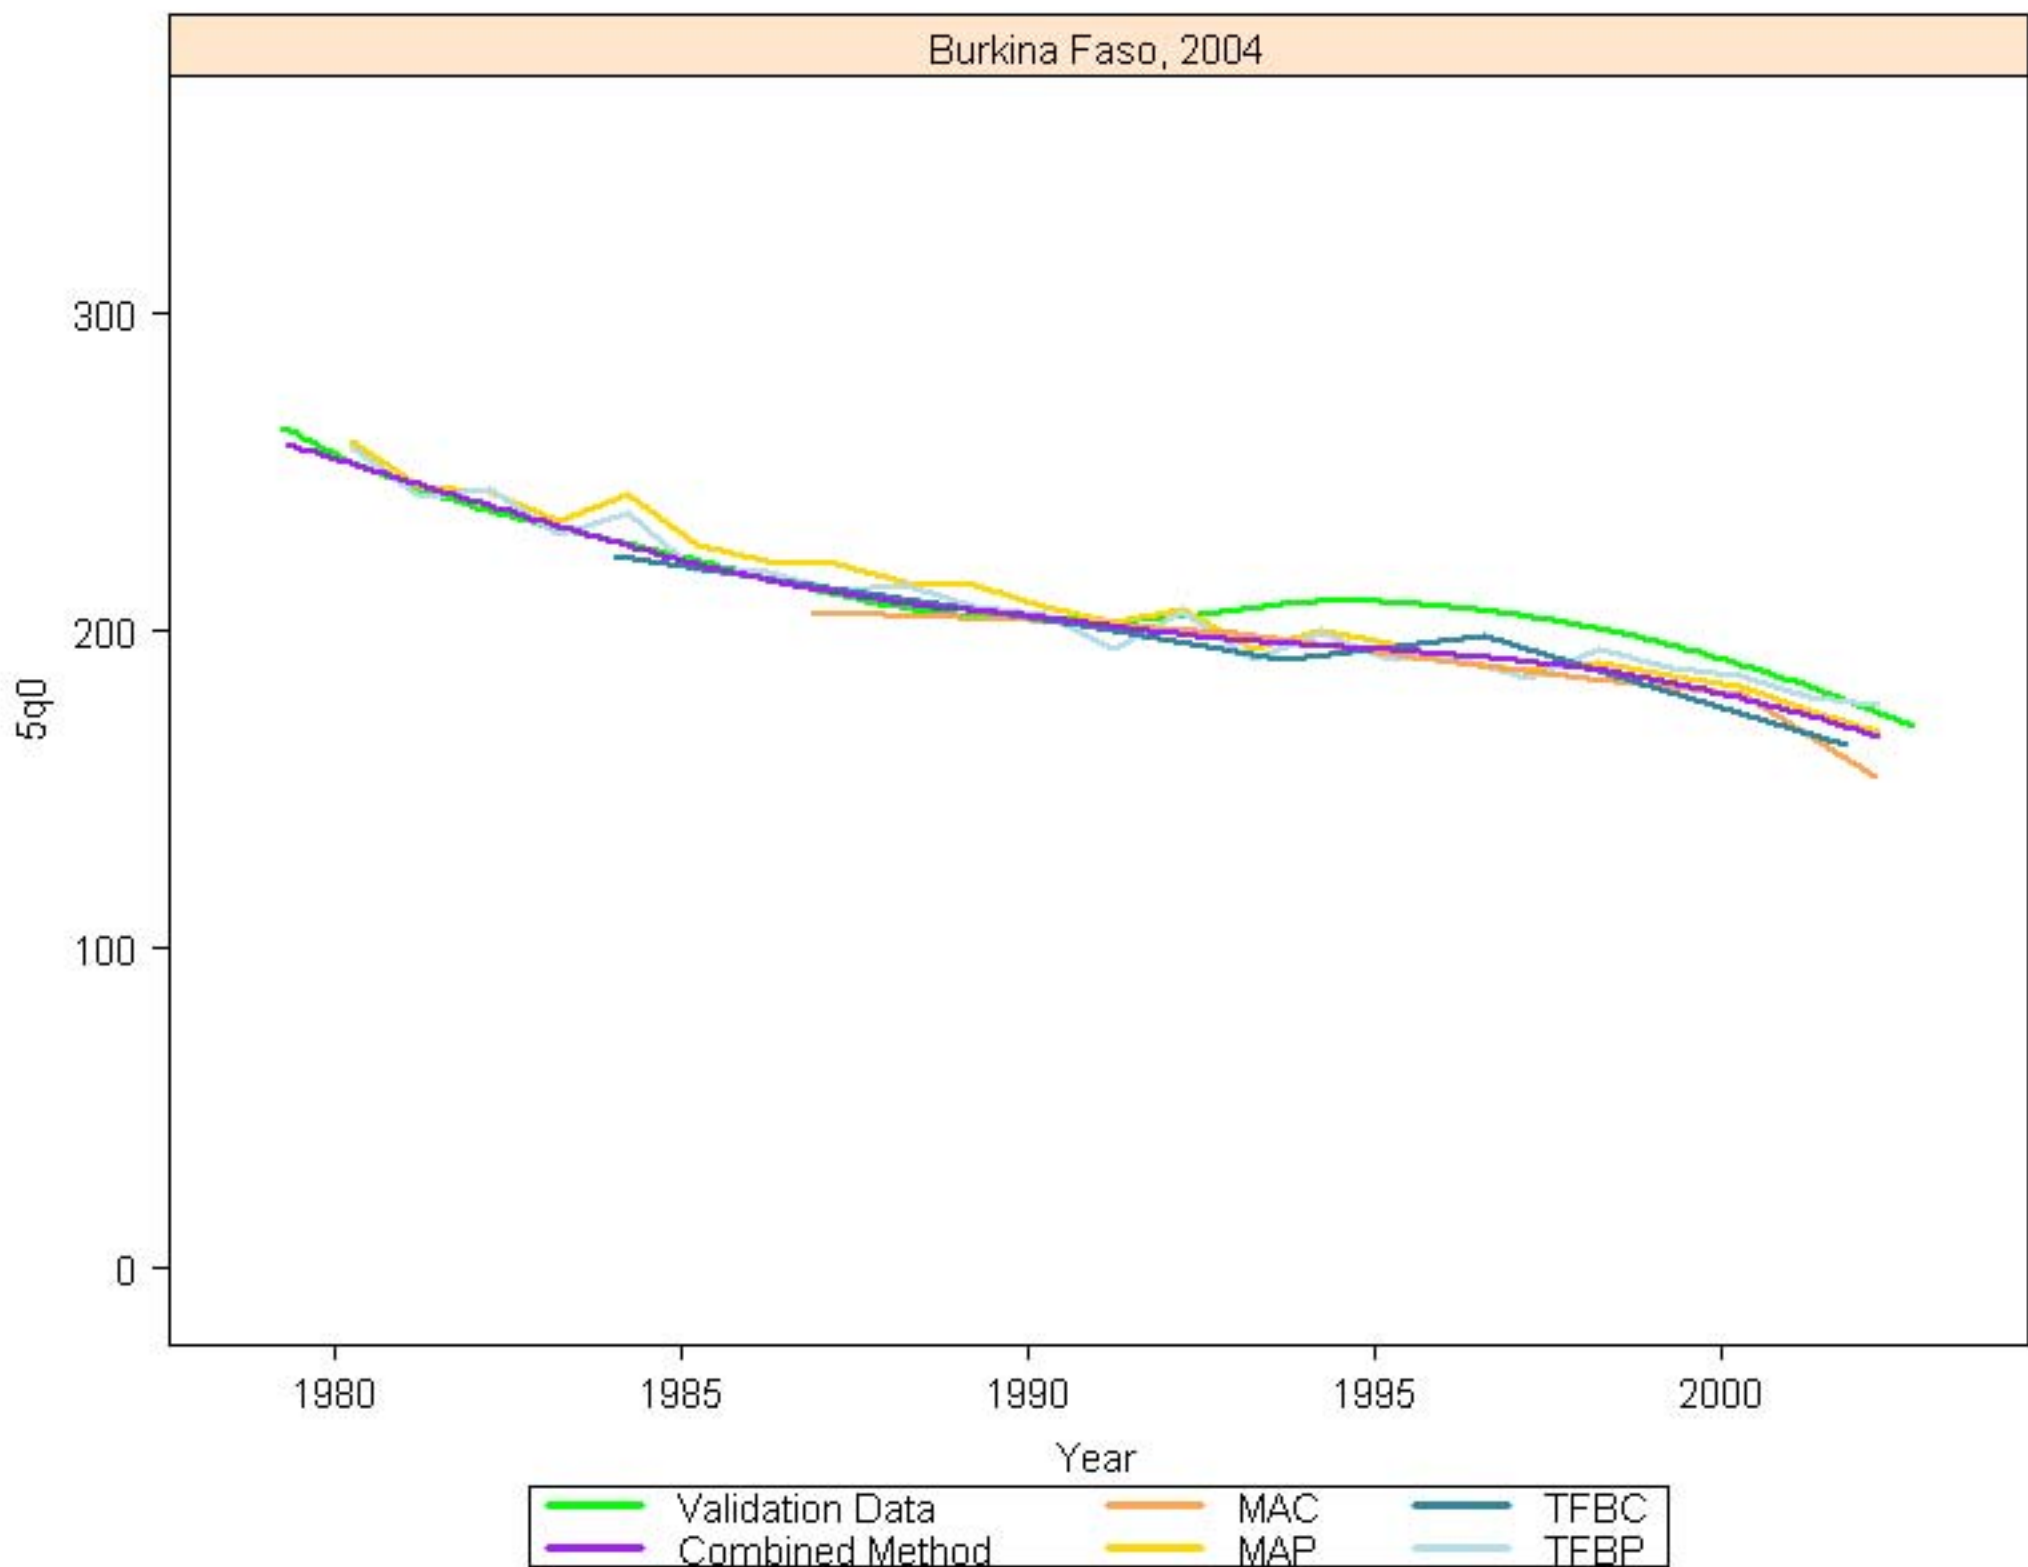

Burundi, 1987

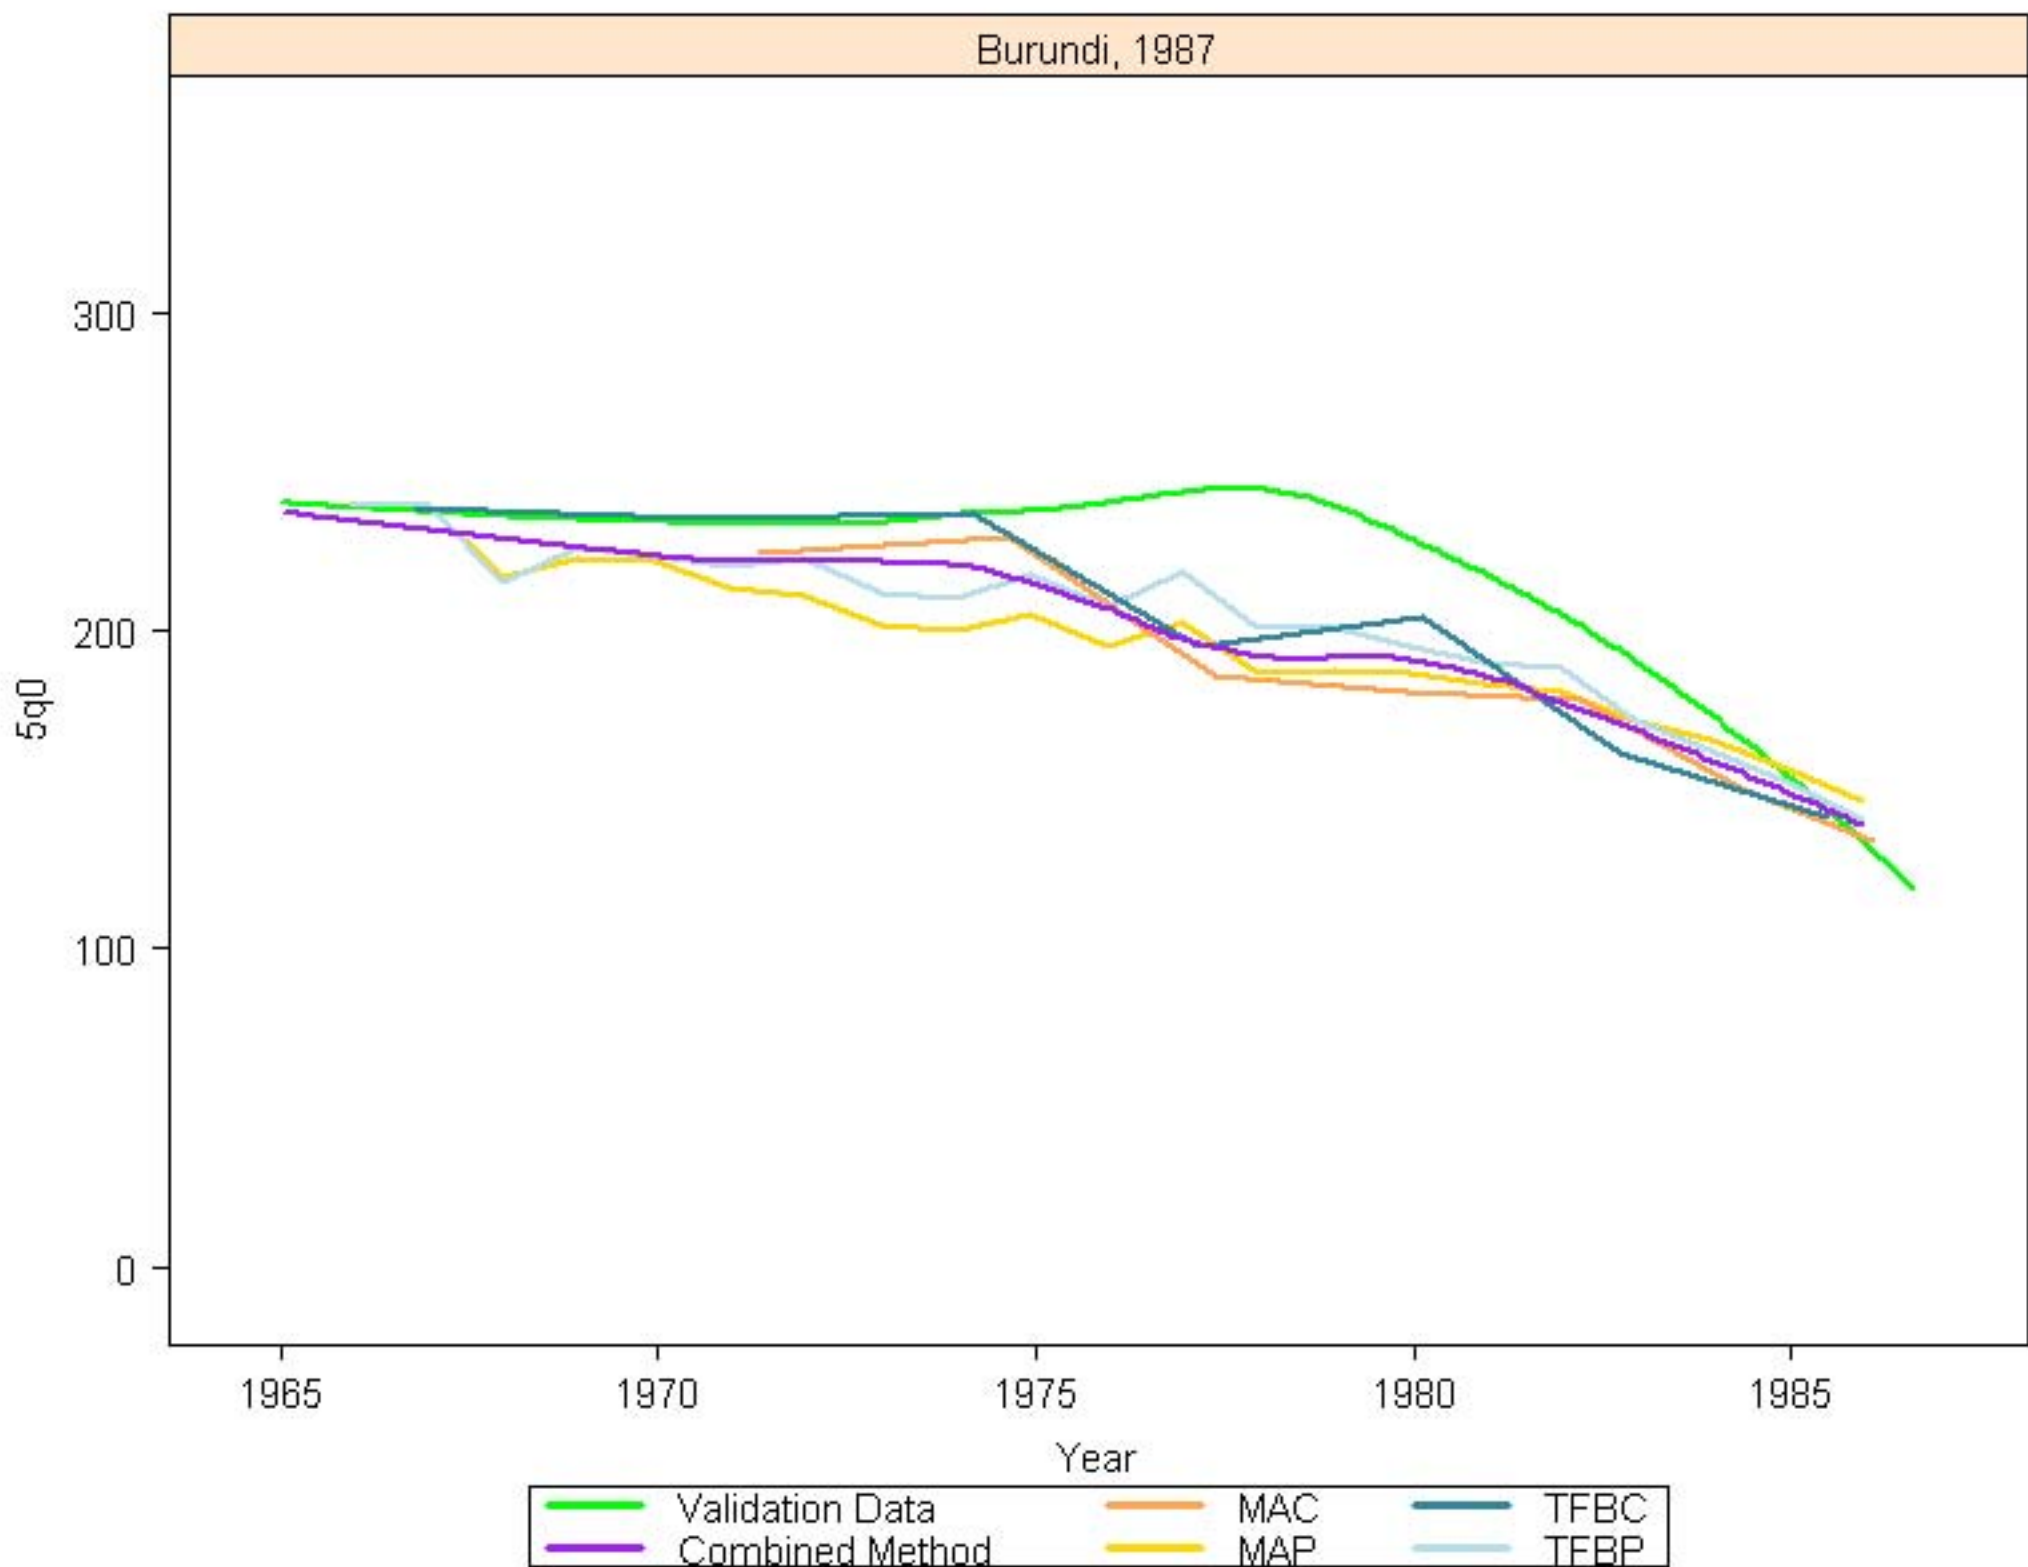

Cambodia, 2000

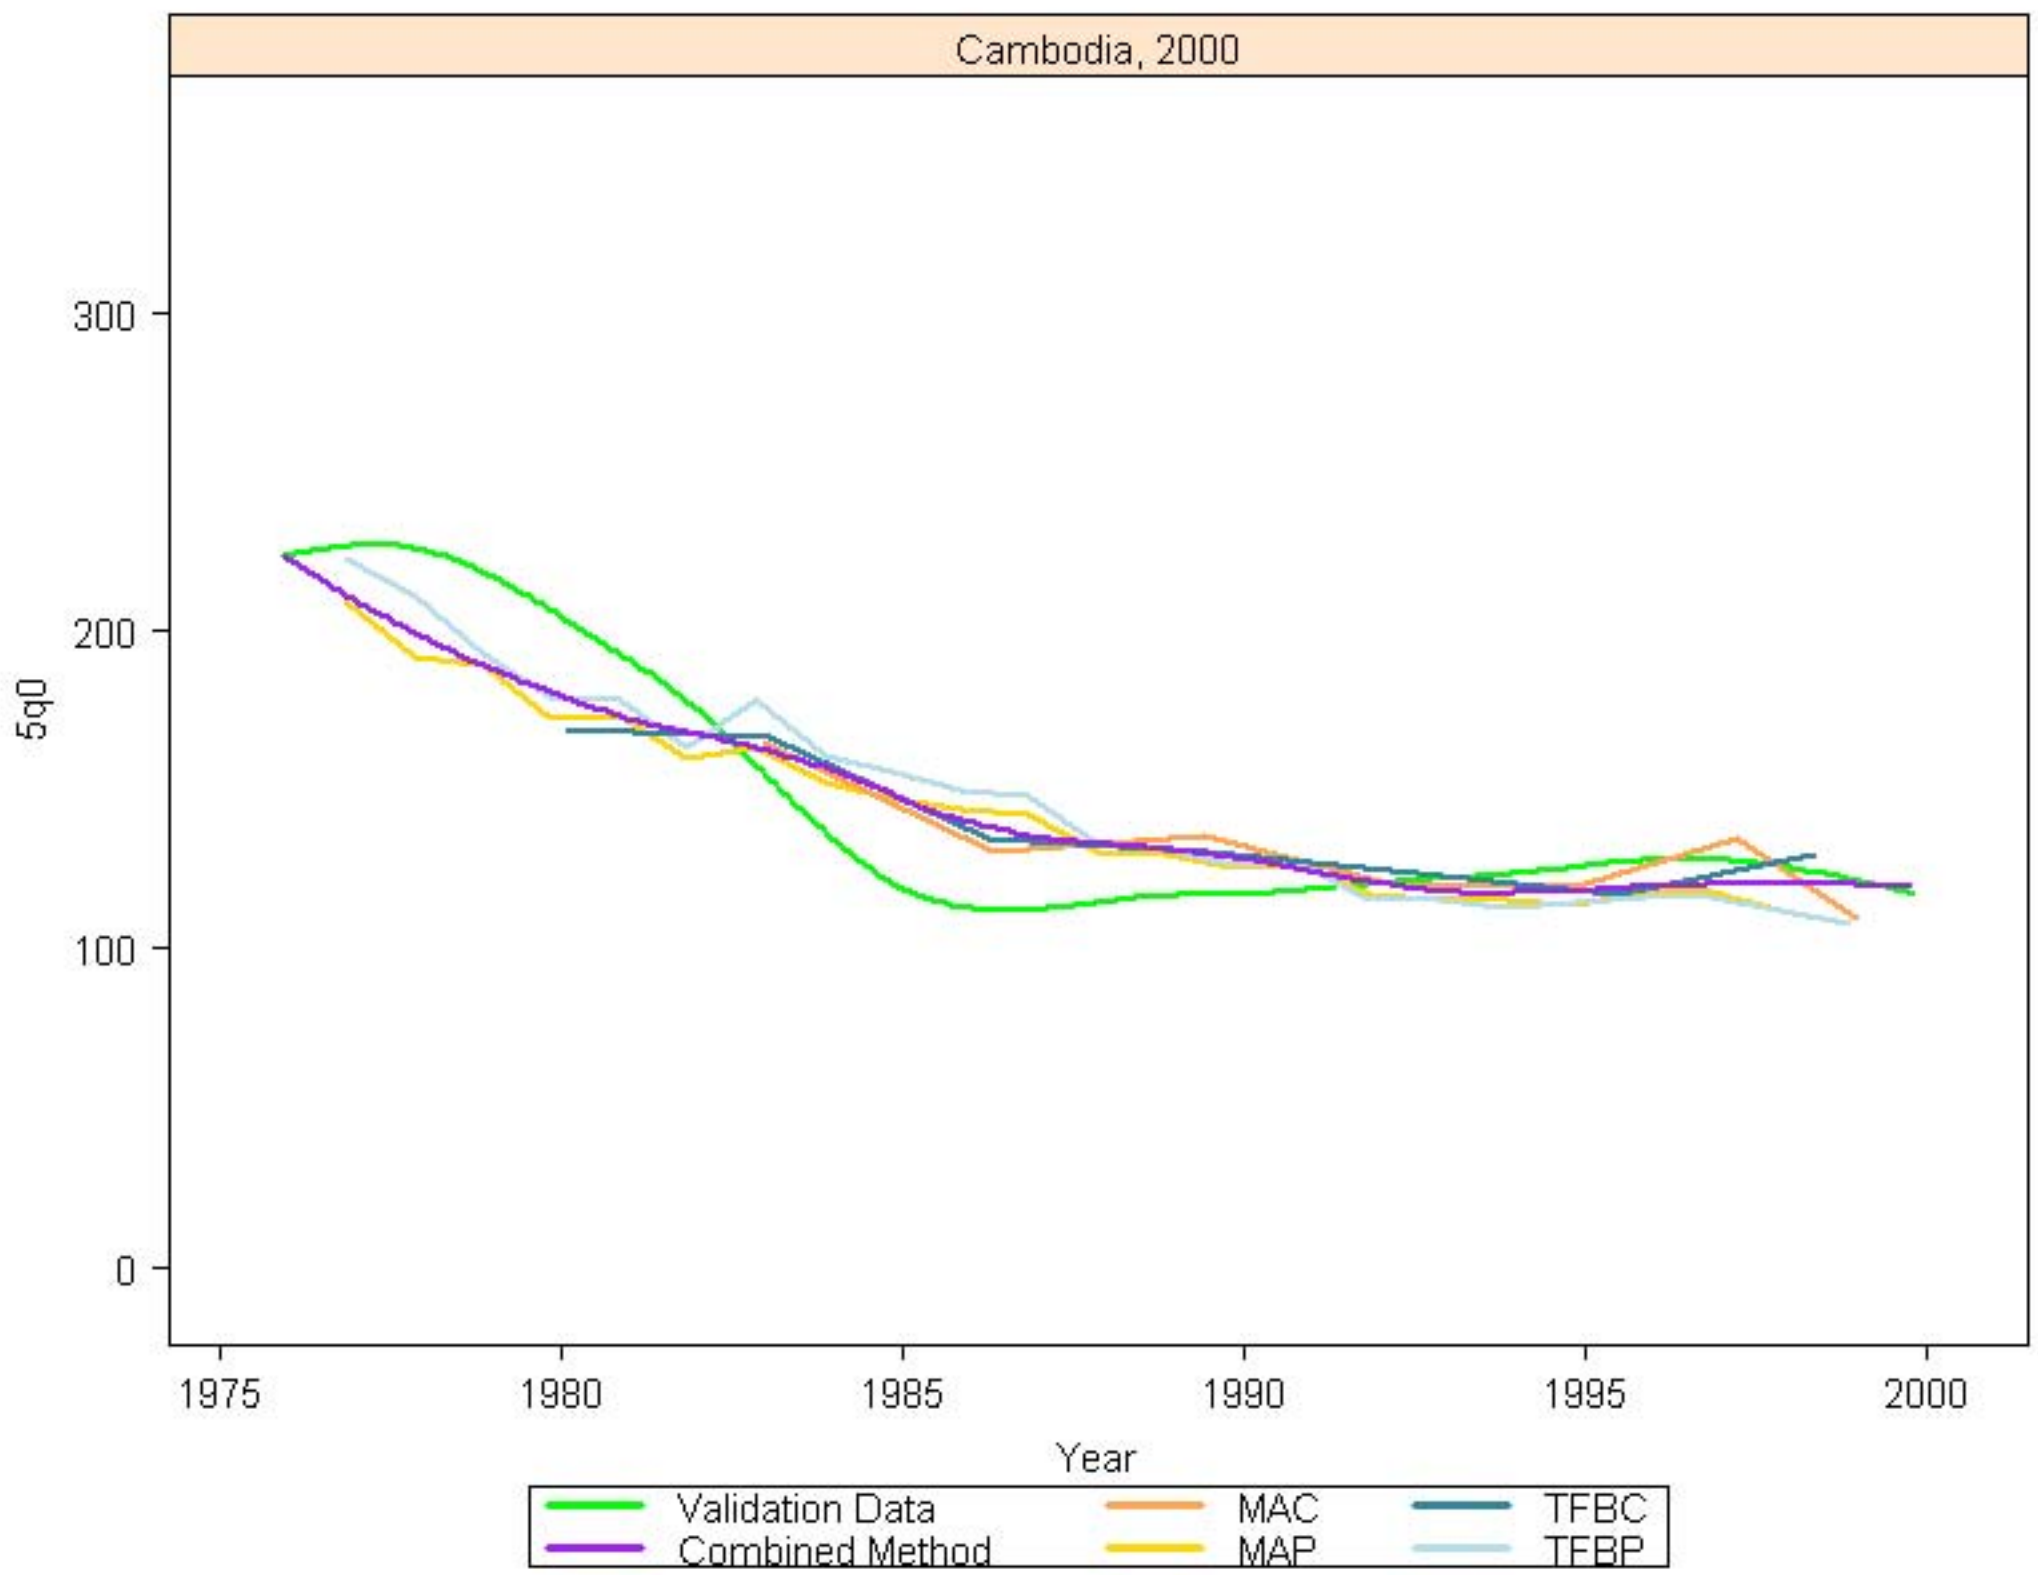

Cambodia, 2006

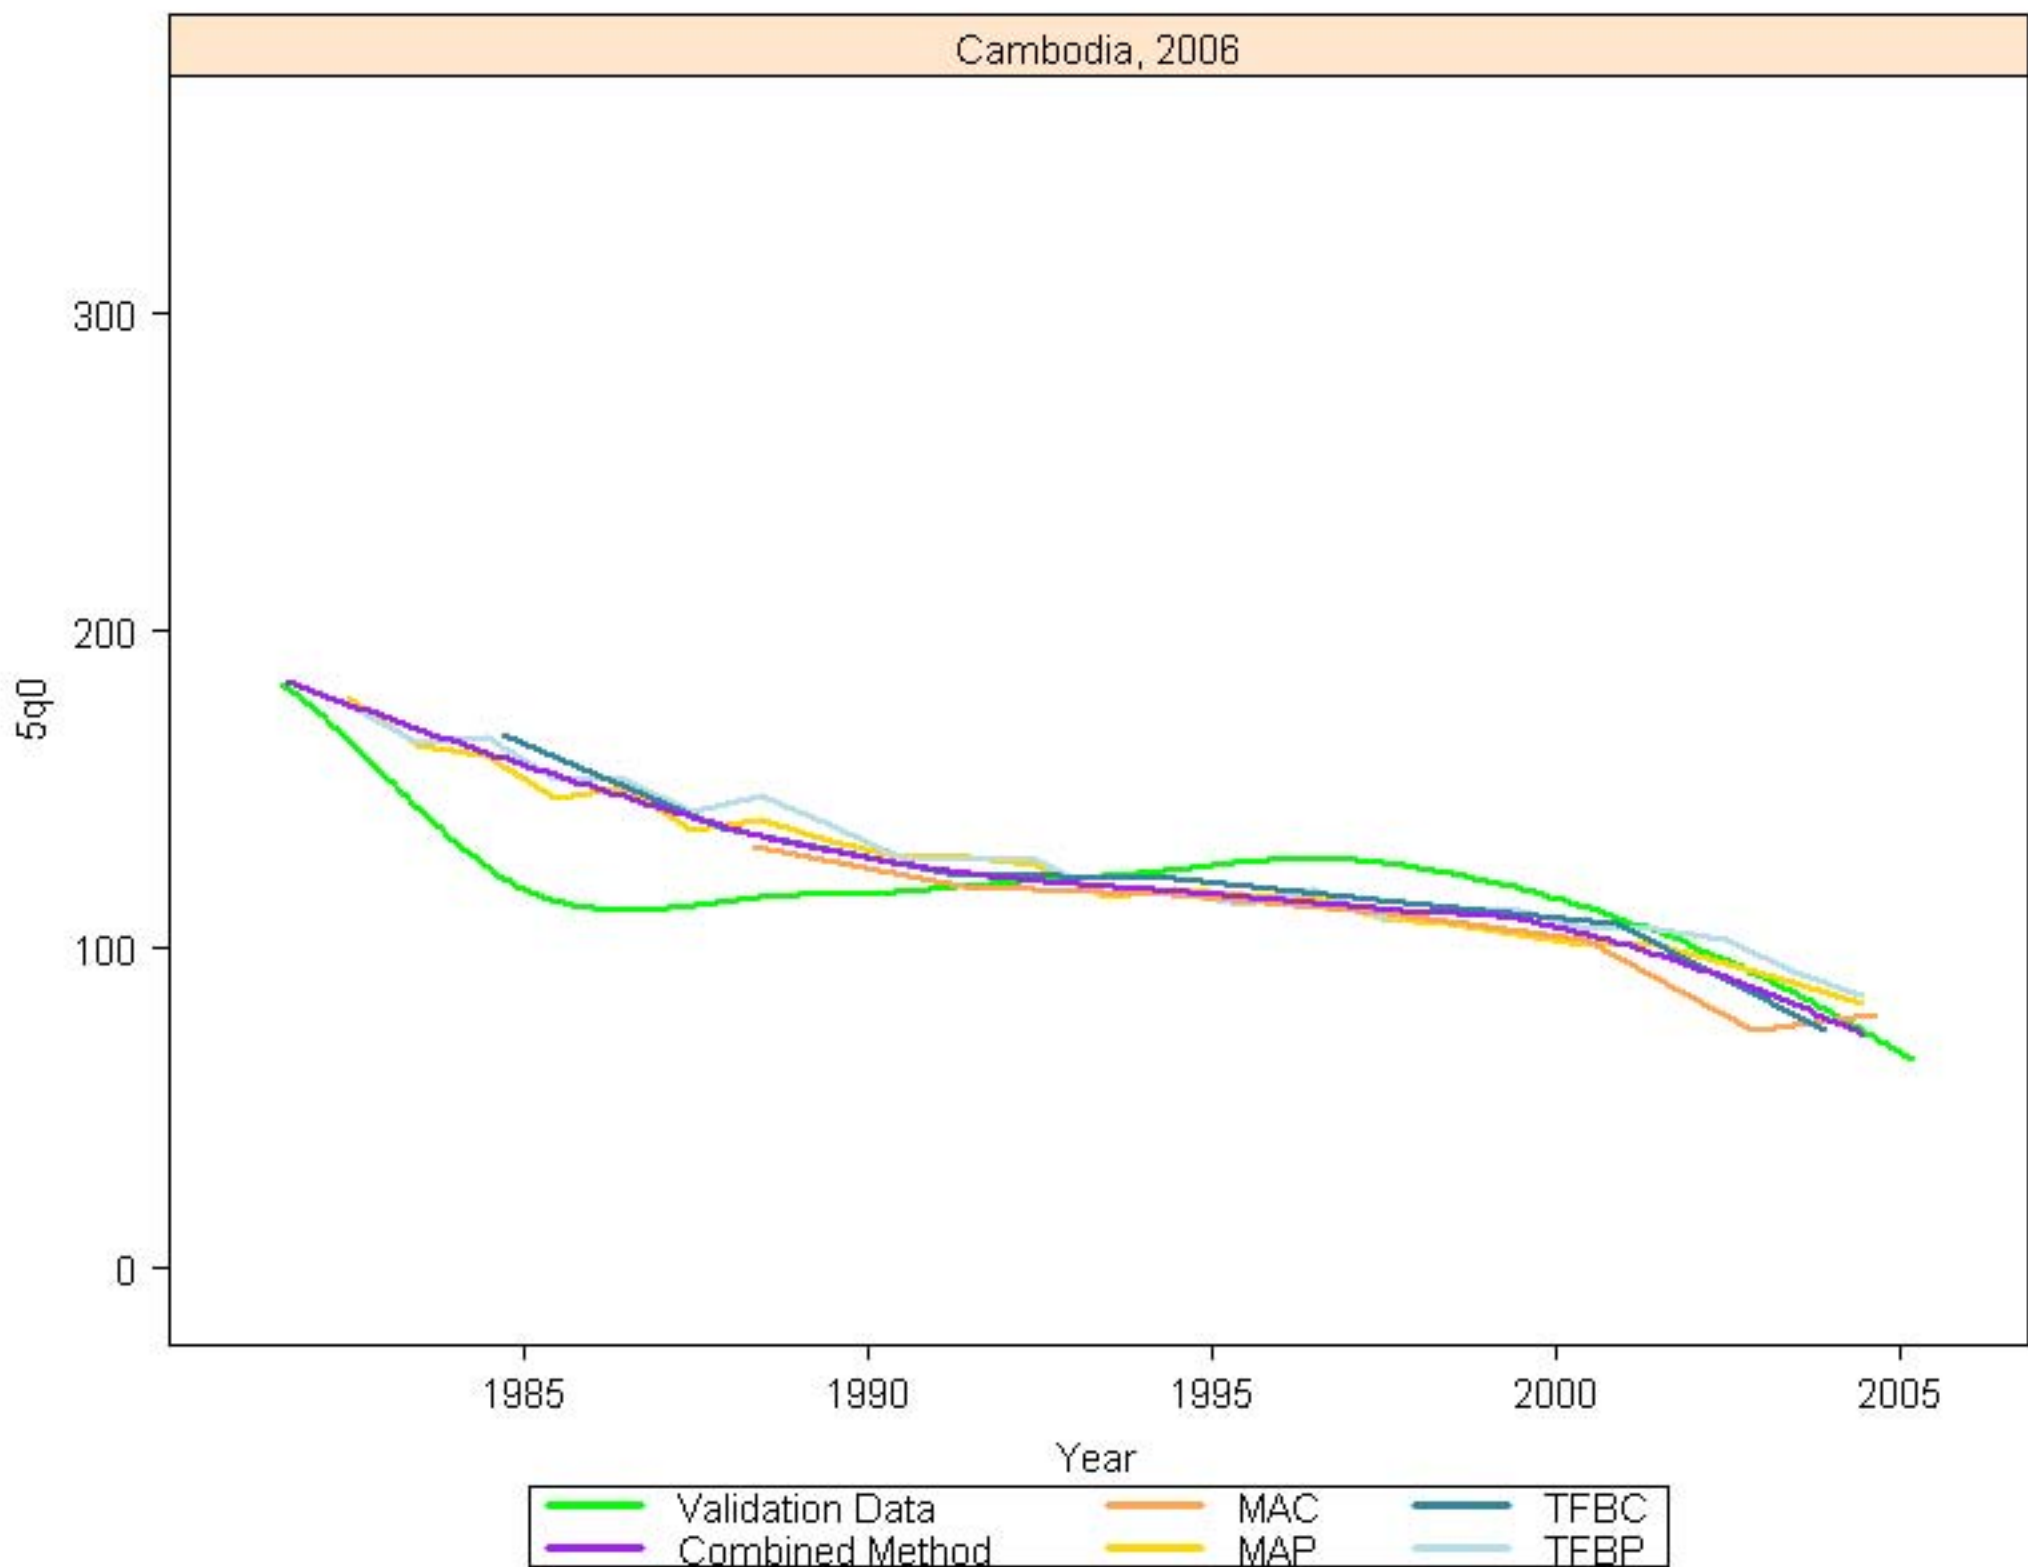

Cameroon, 1992

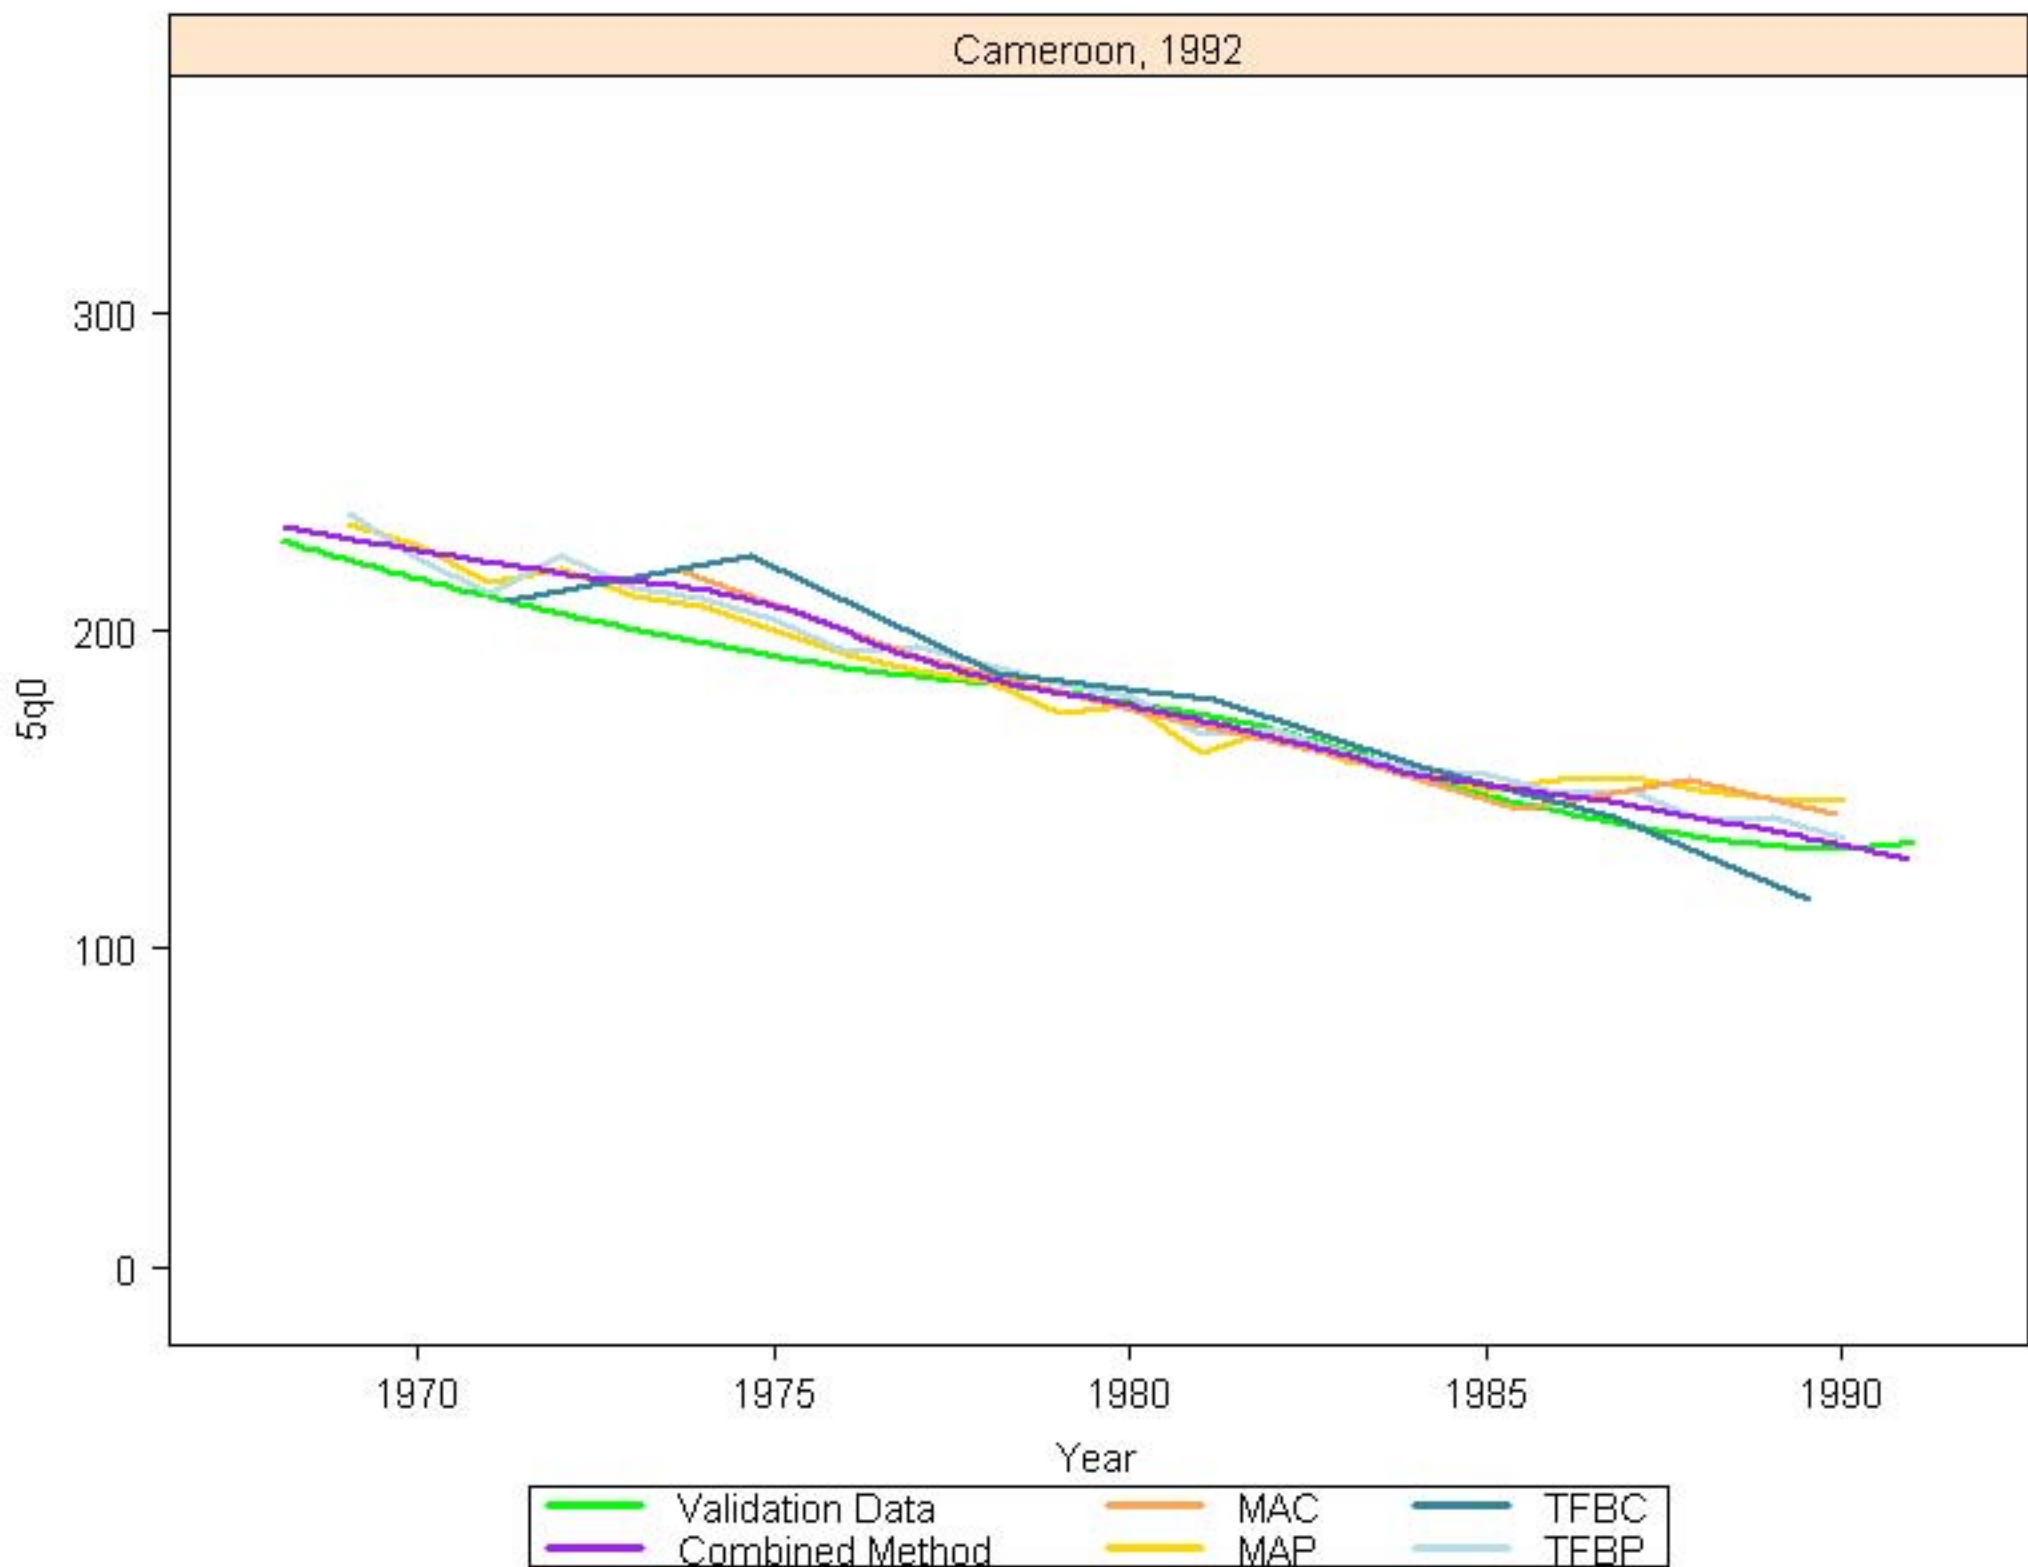



Cameroon, 1998

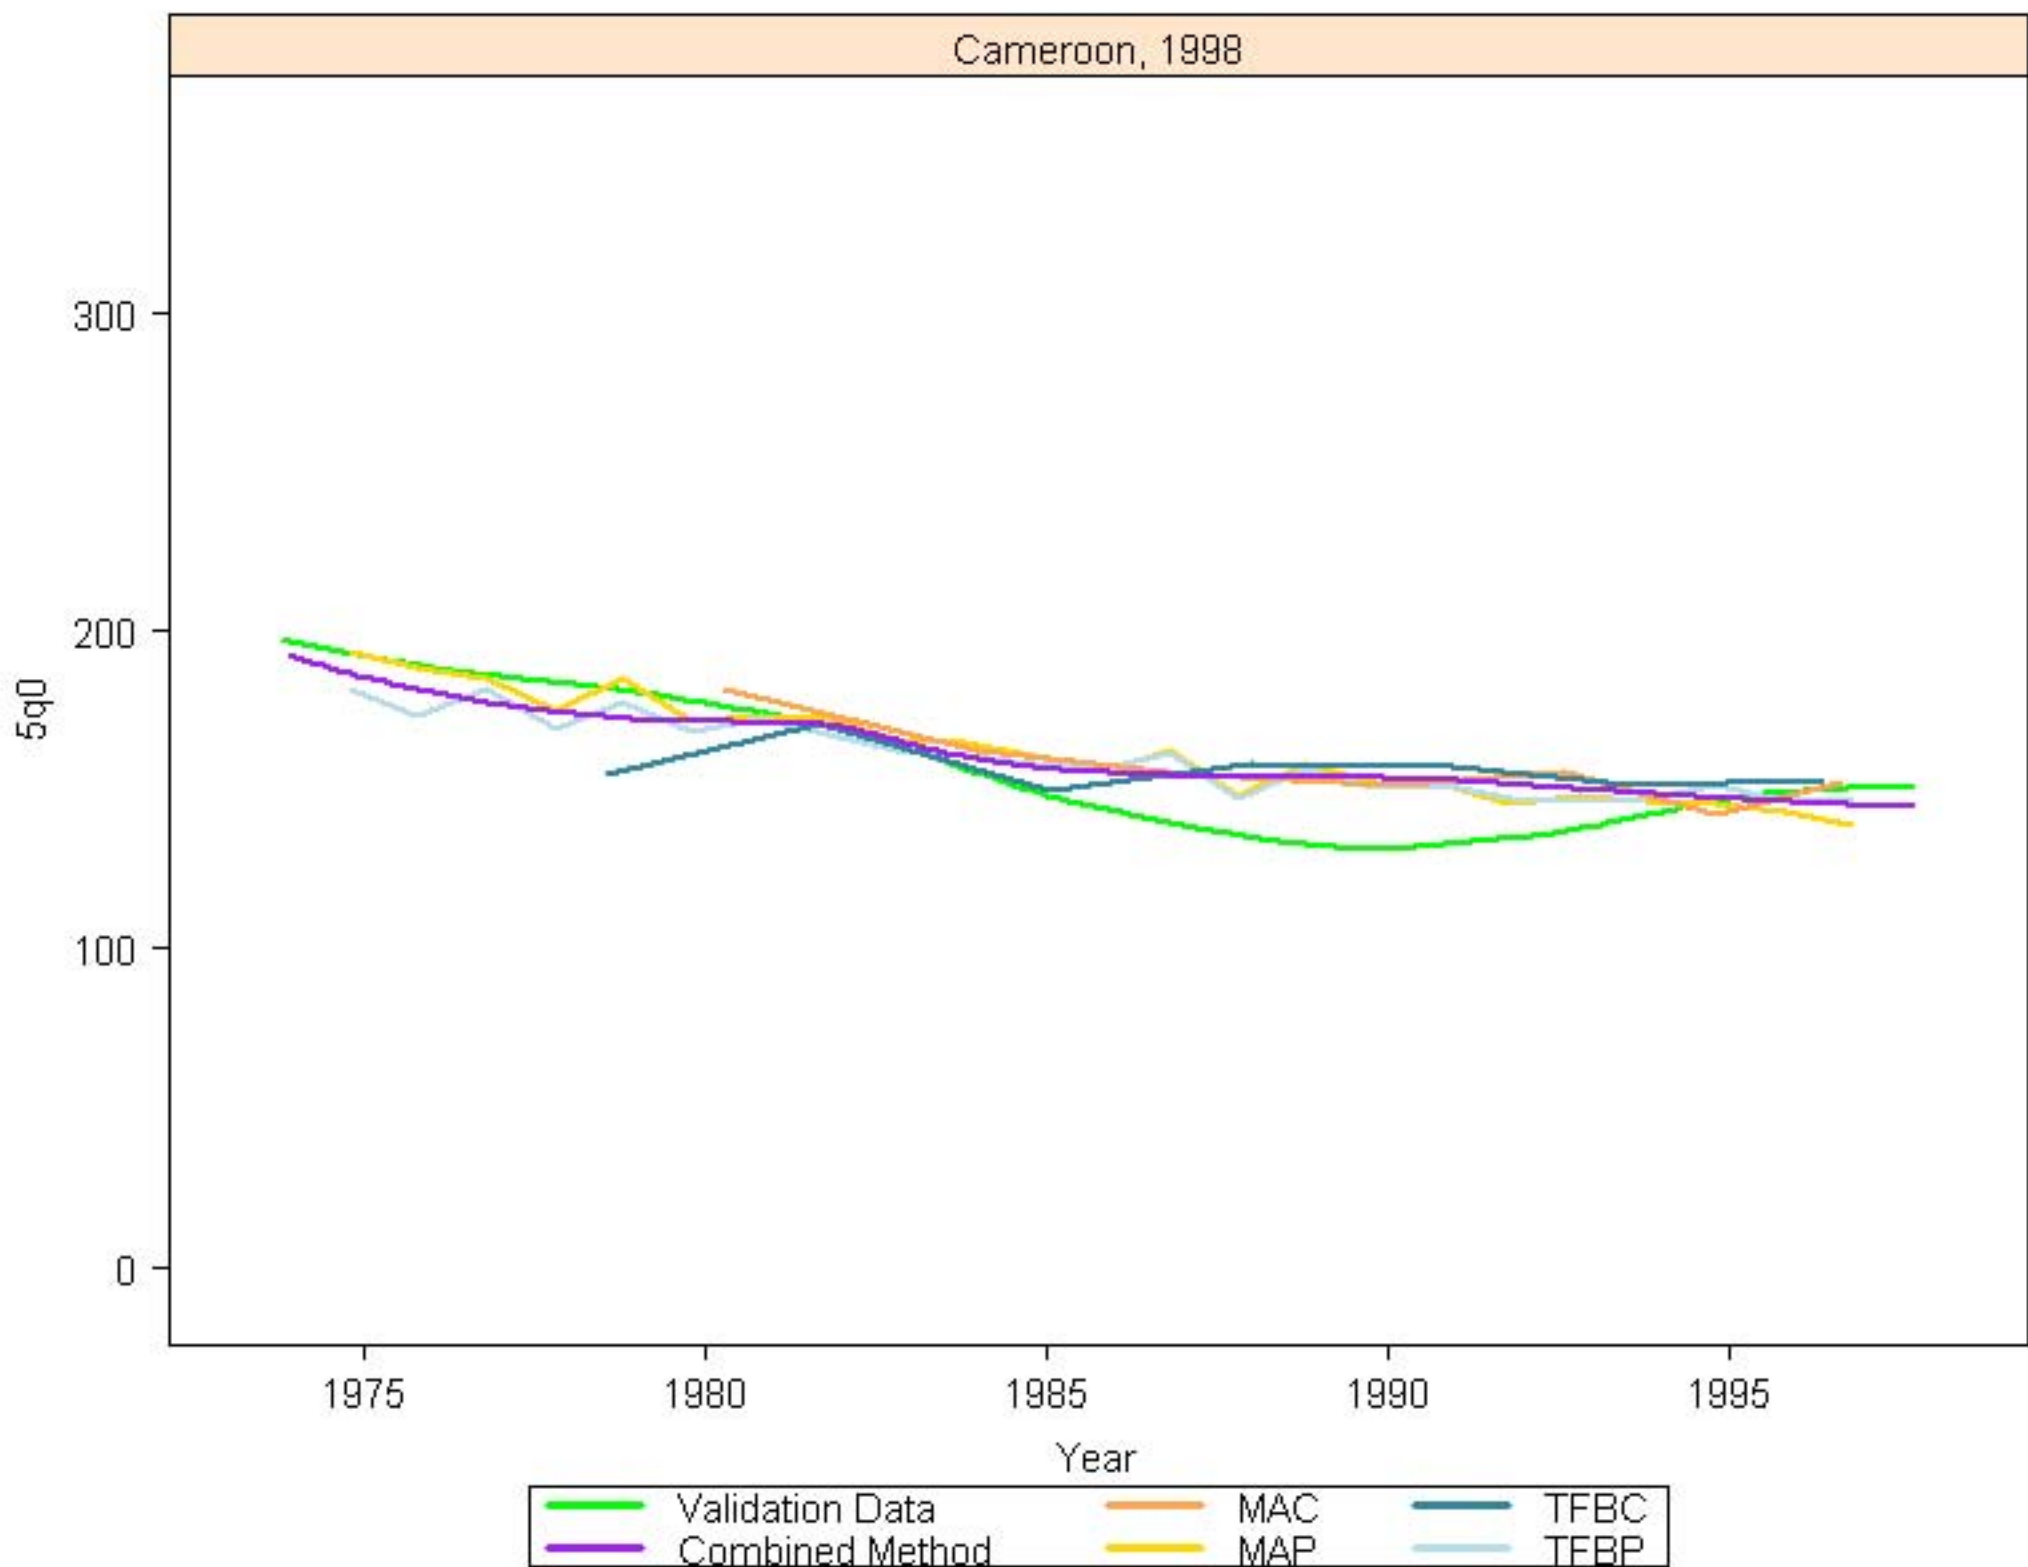

Cameroon, 2004

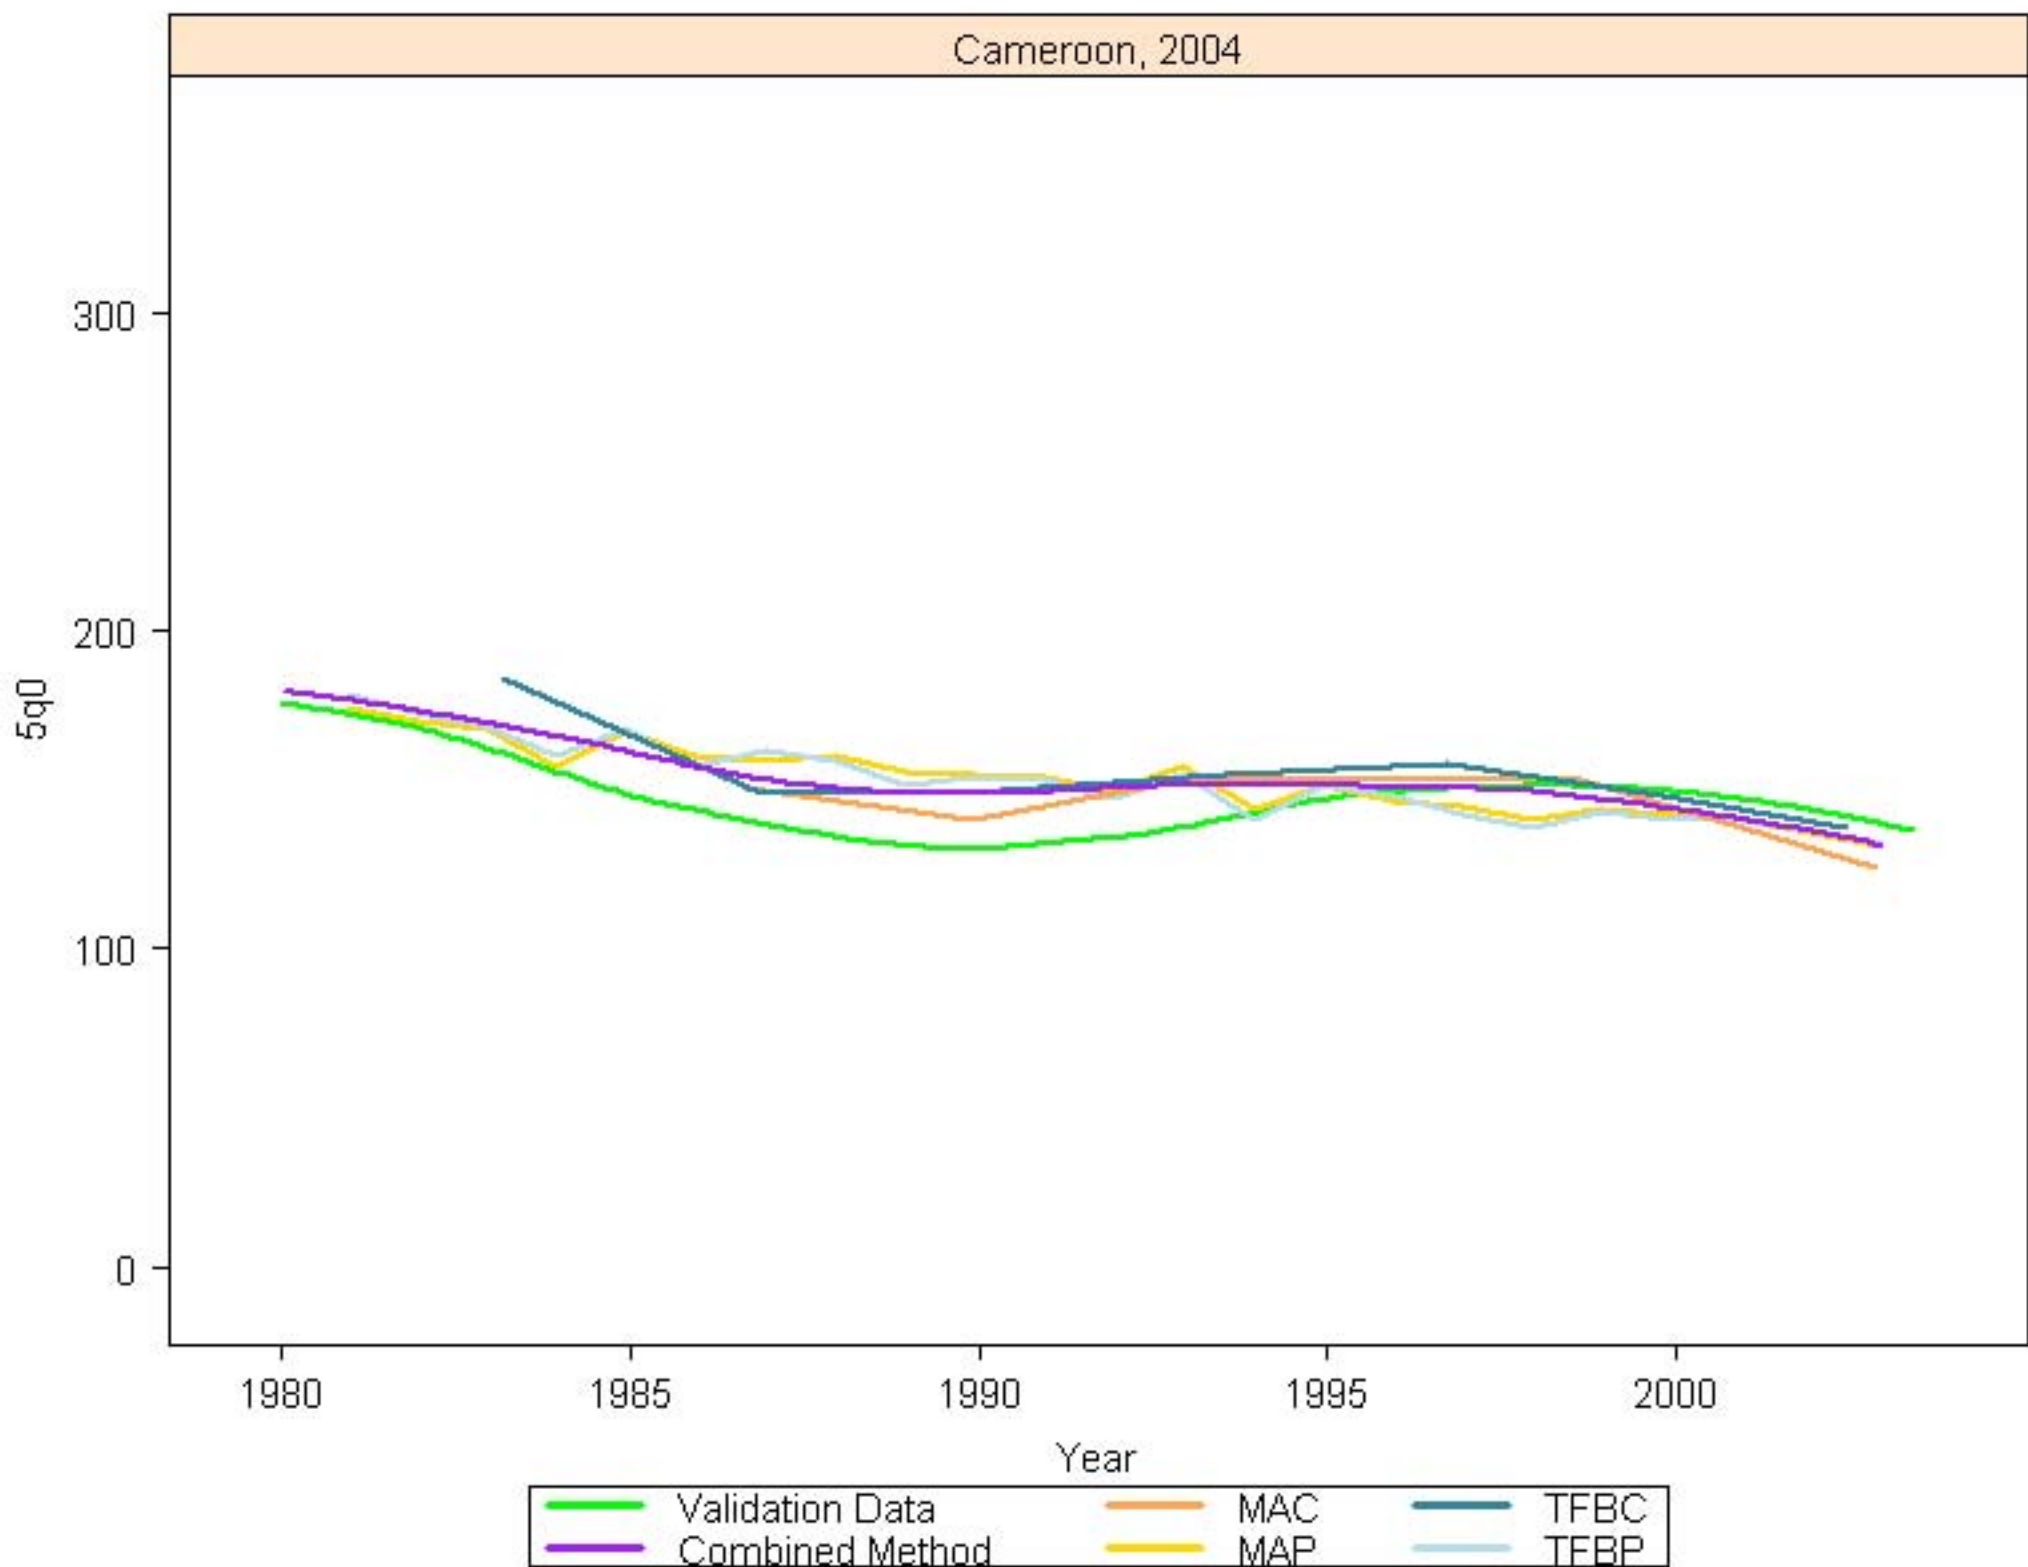

Validation Data      MAC      TFBC  
Combined Method      MAP      TFBP

Central African Republic, 1995

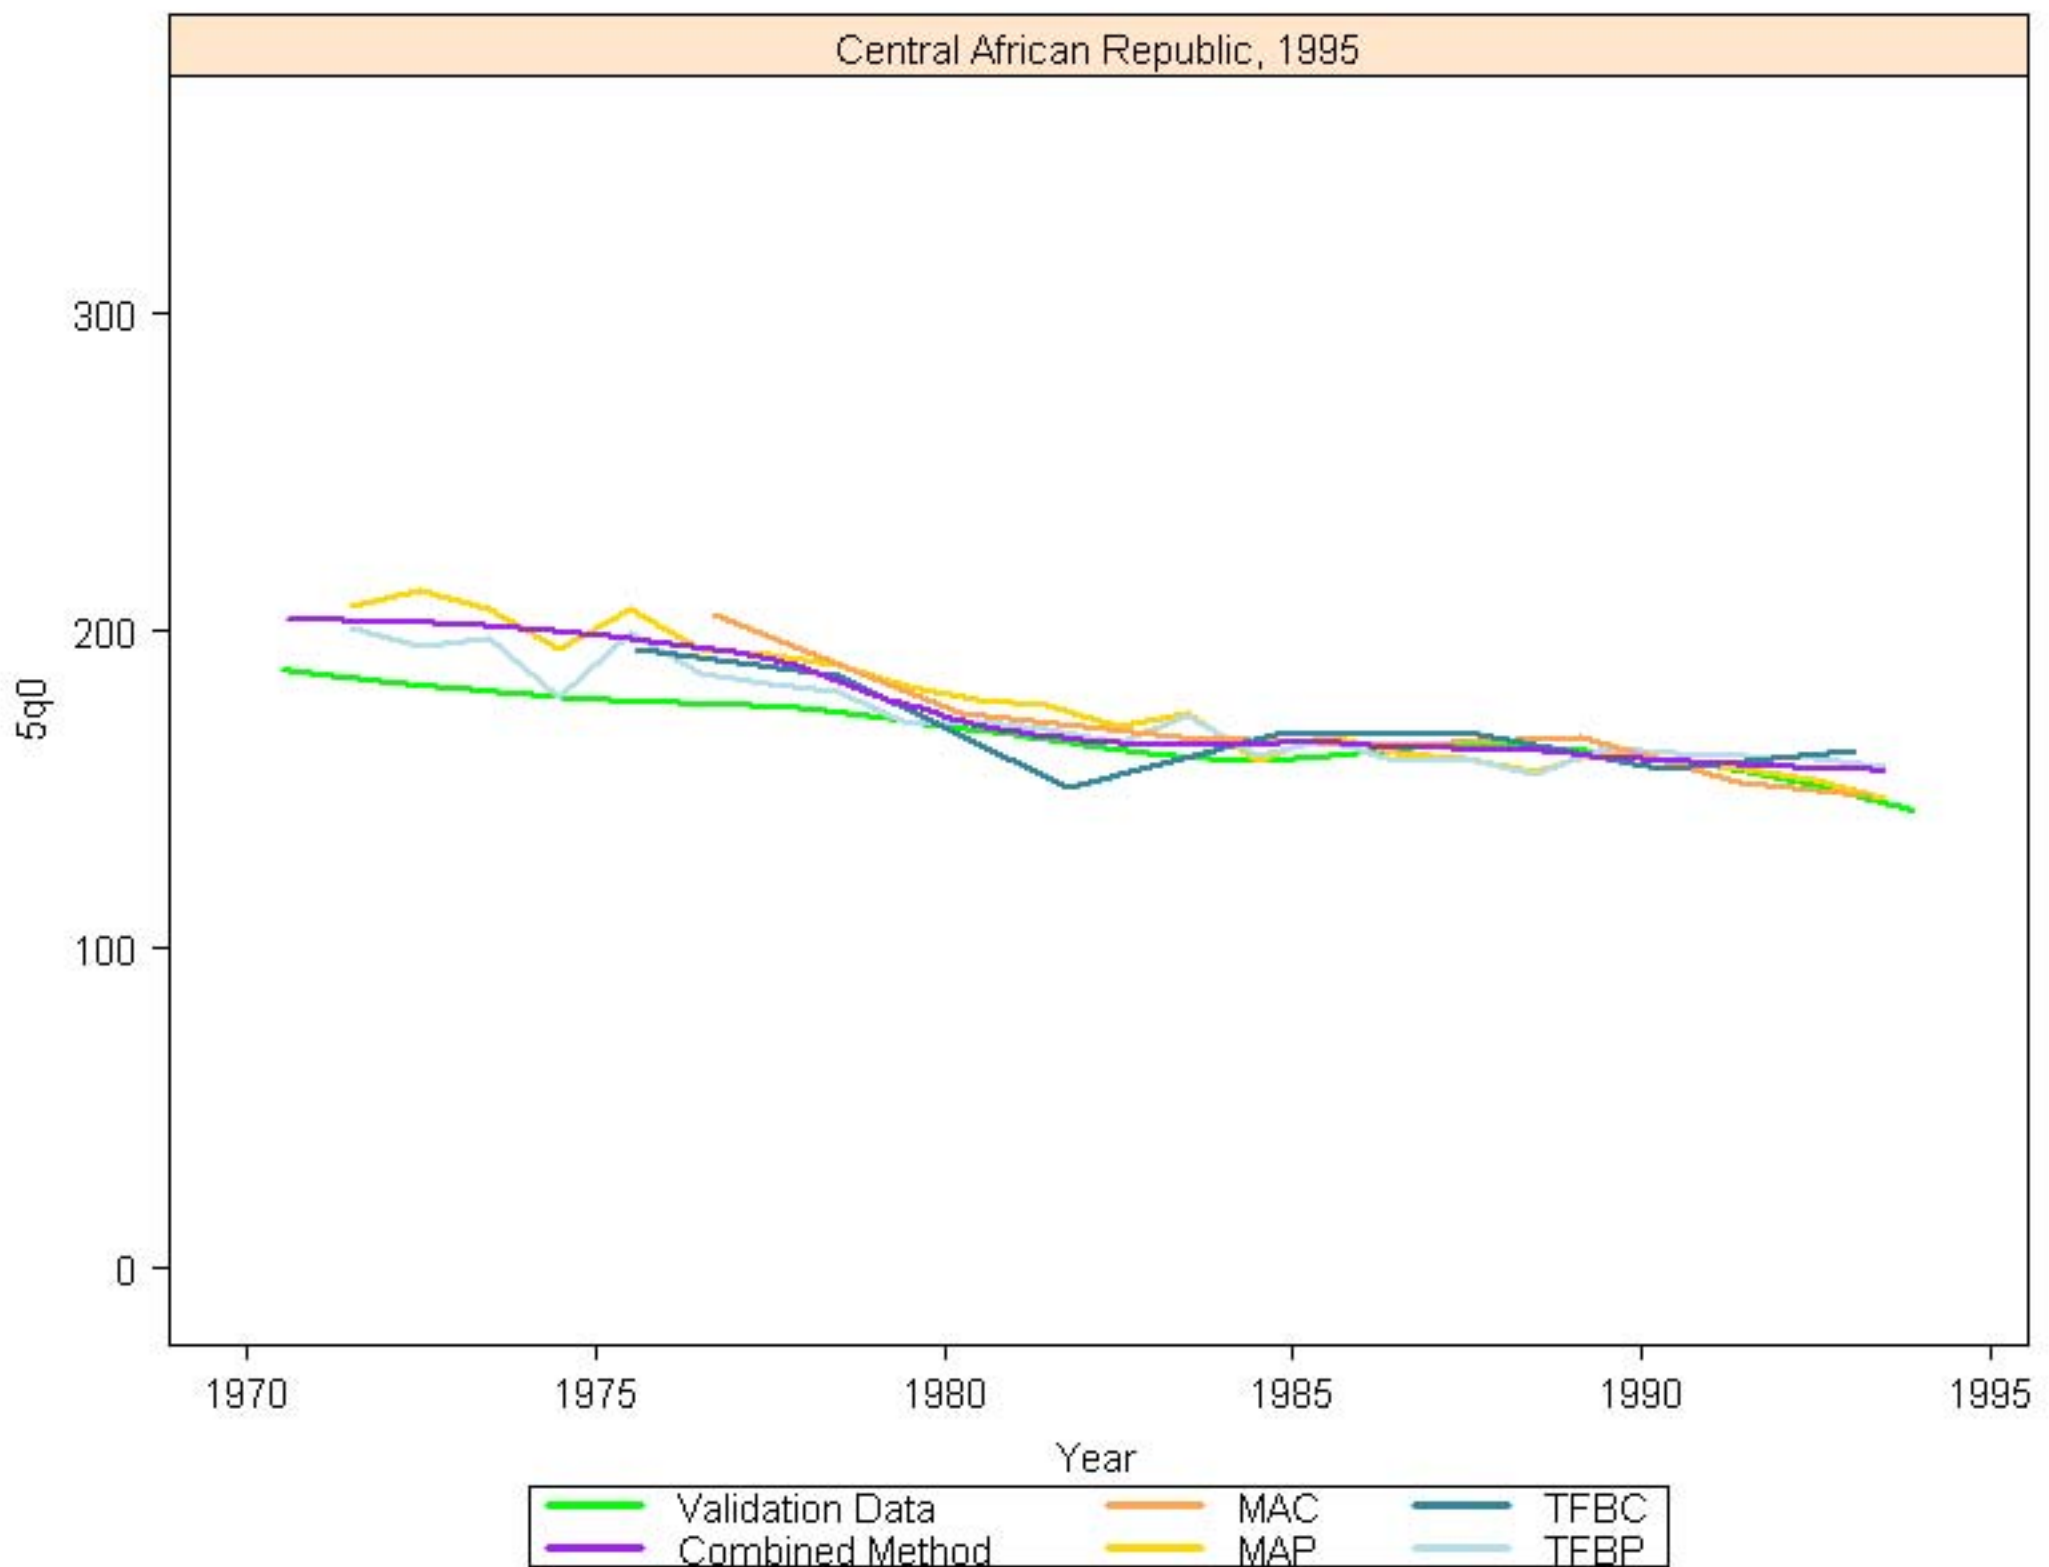

Chad, 1997

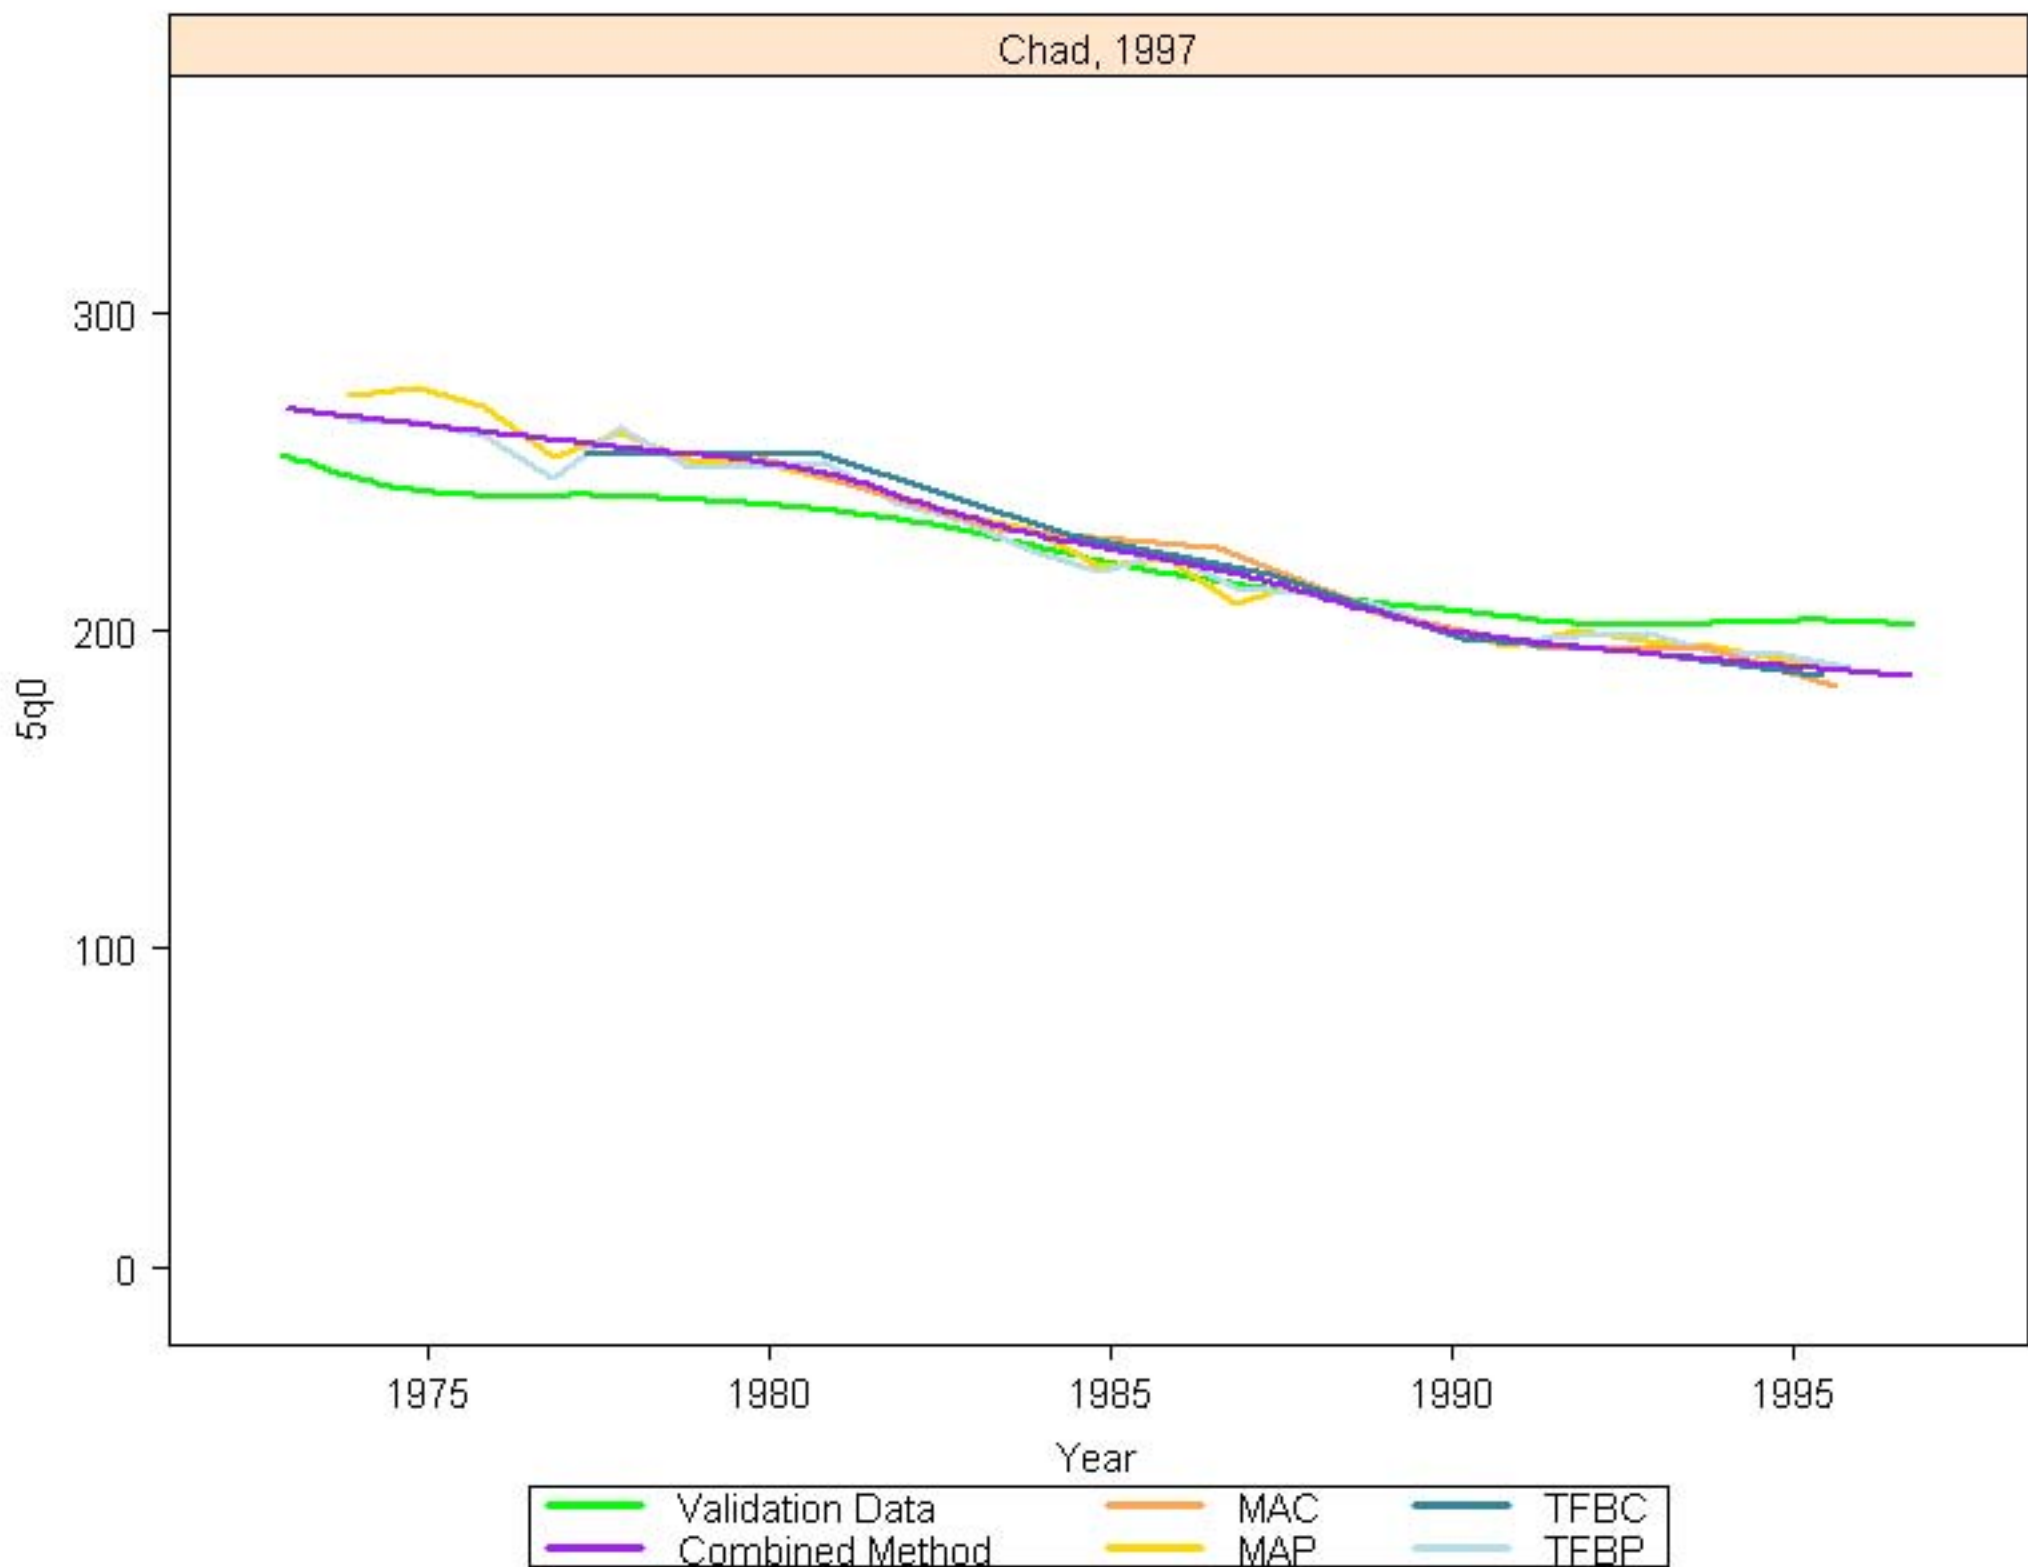

Chad, 2005

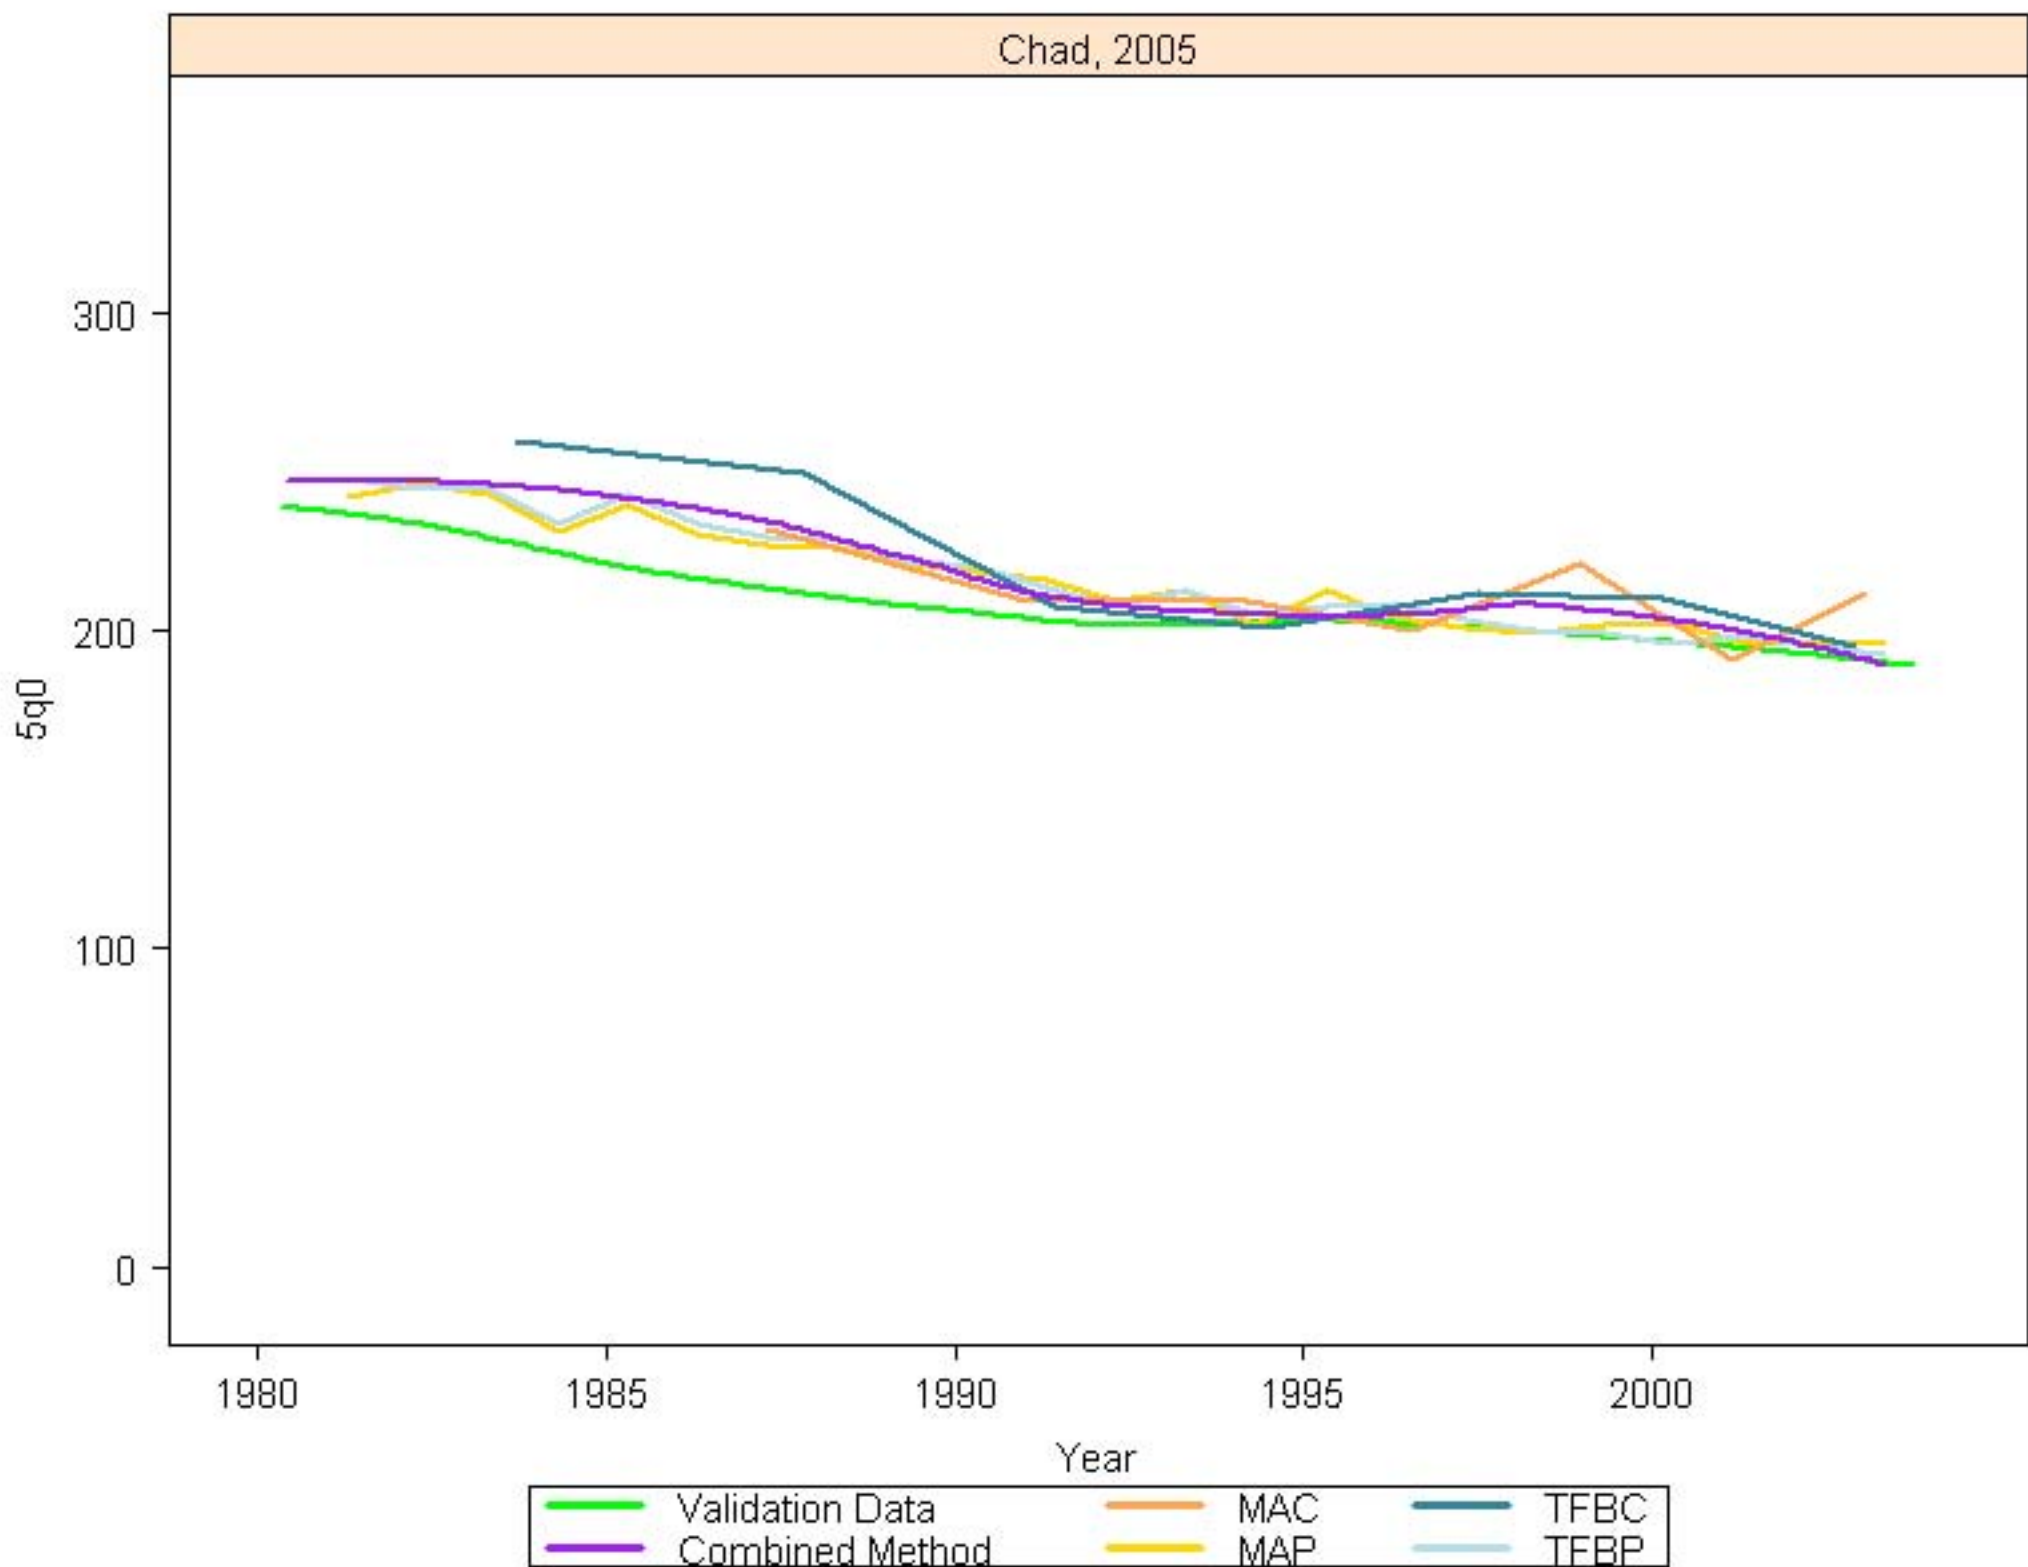

Colombia, 1987

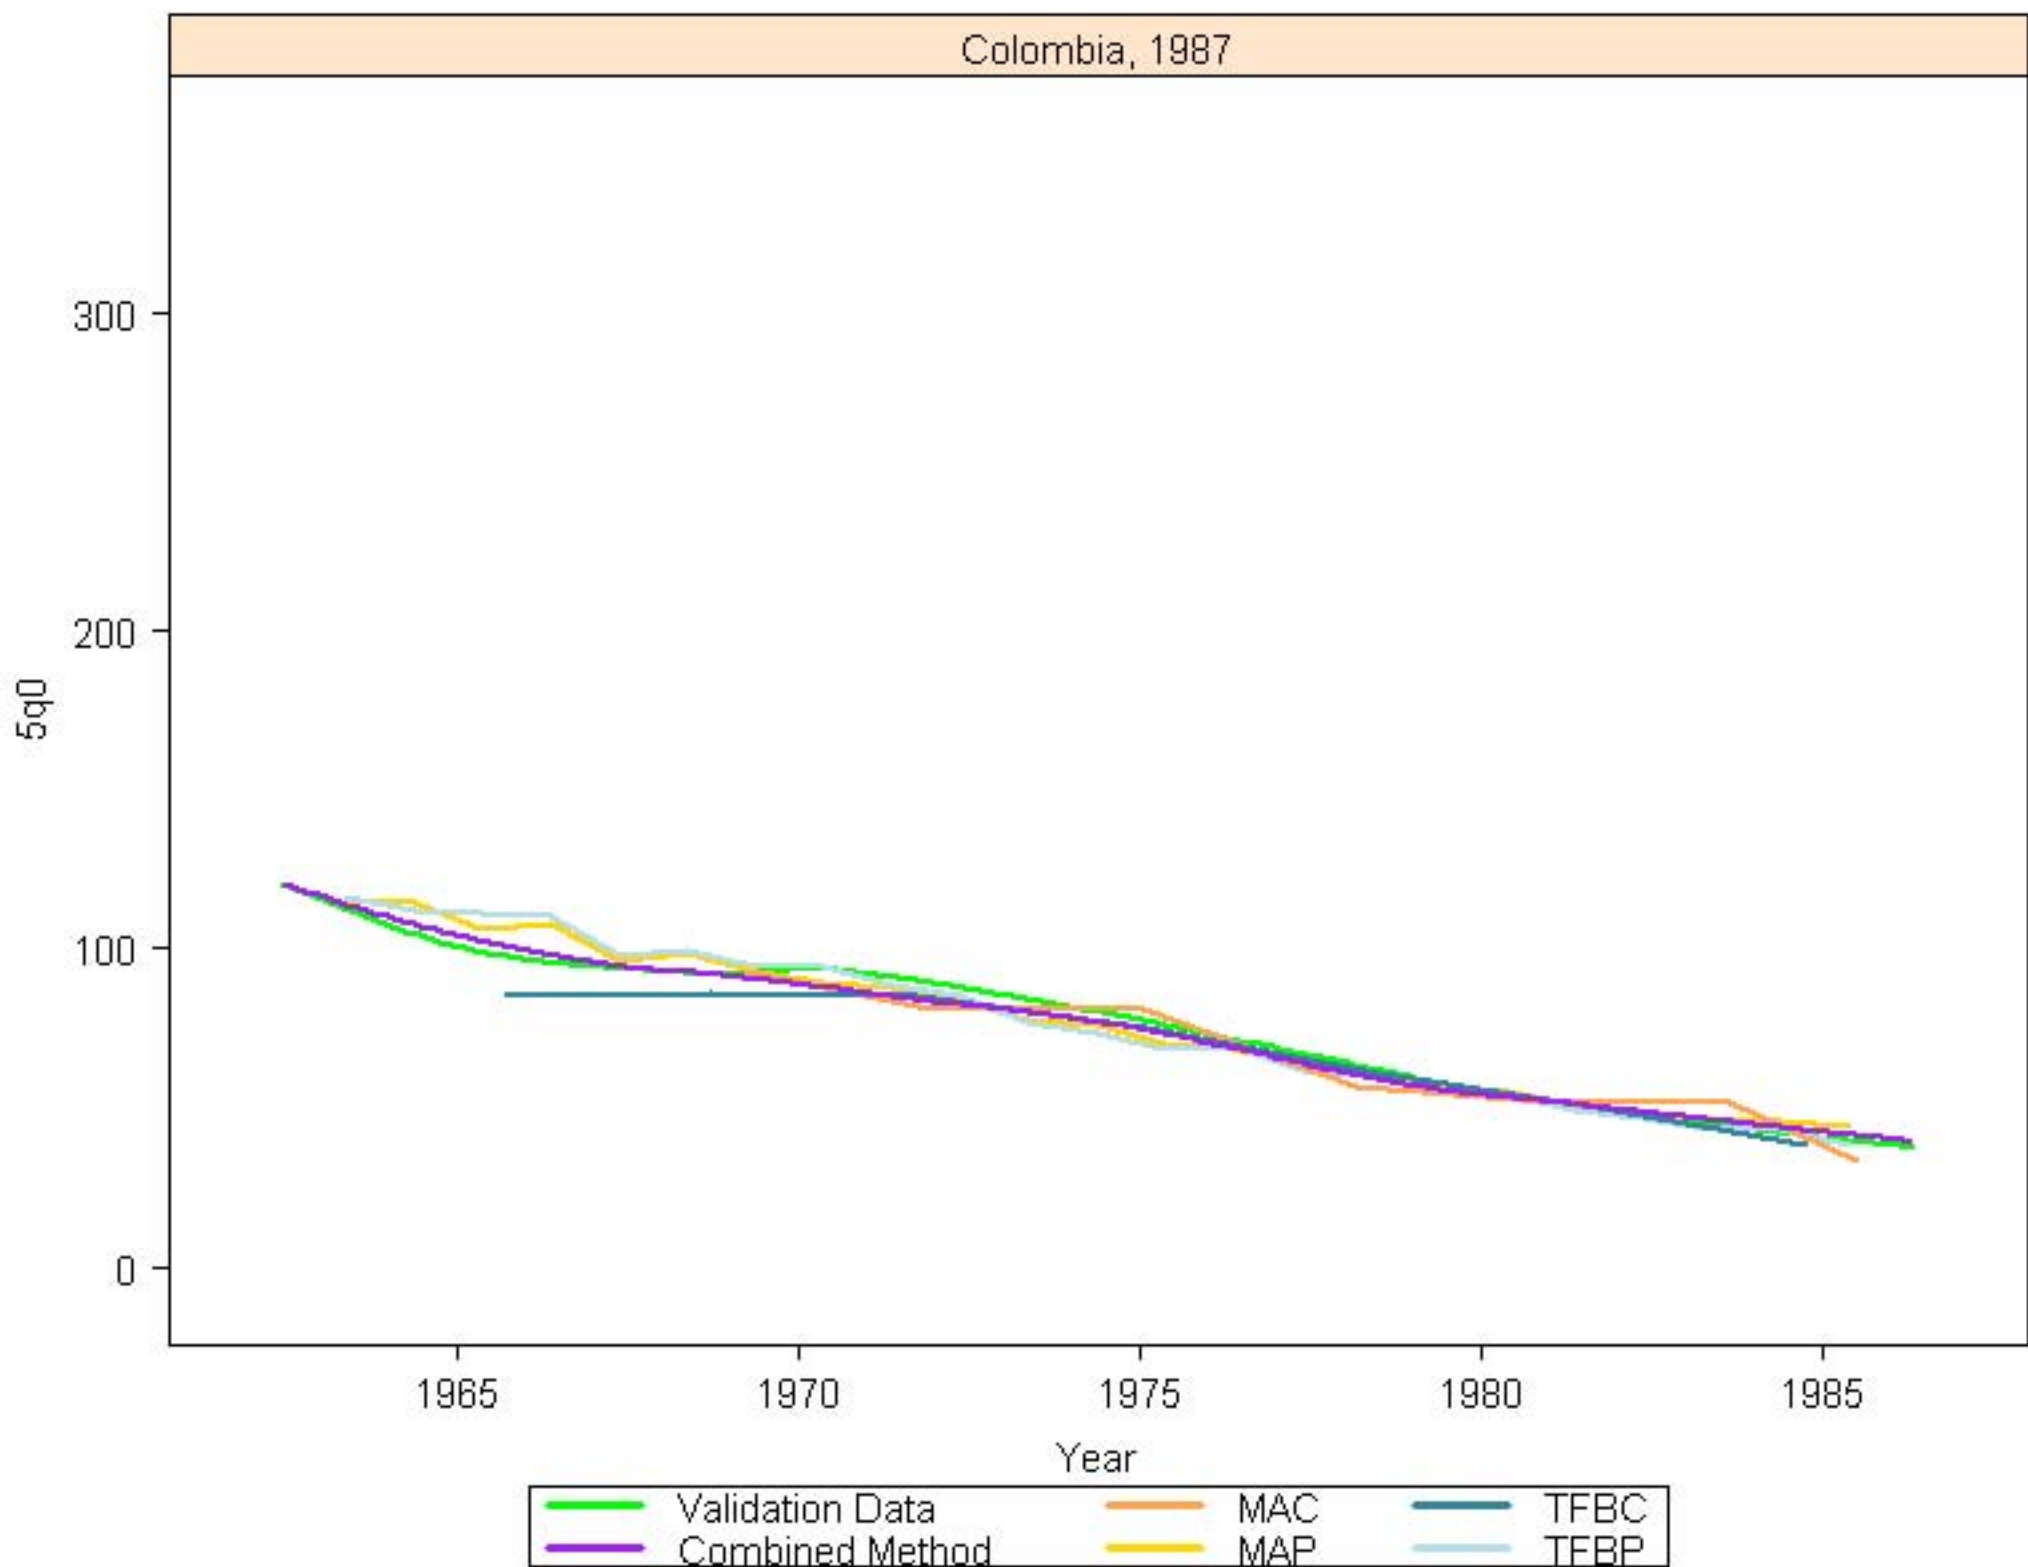

Colombia, 1991

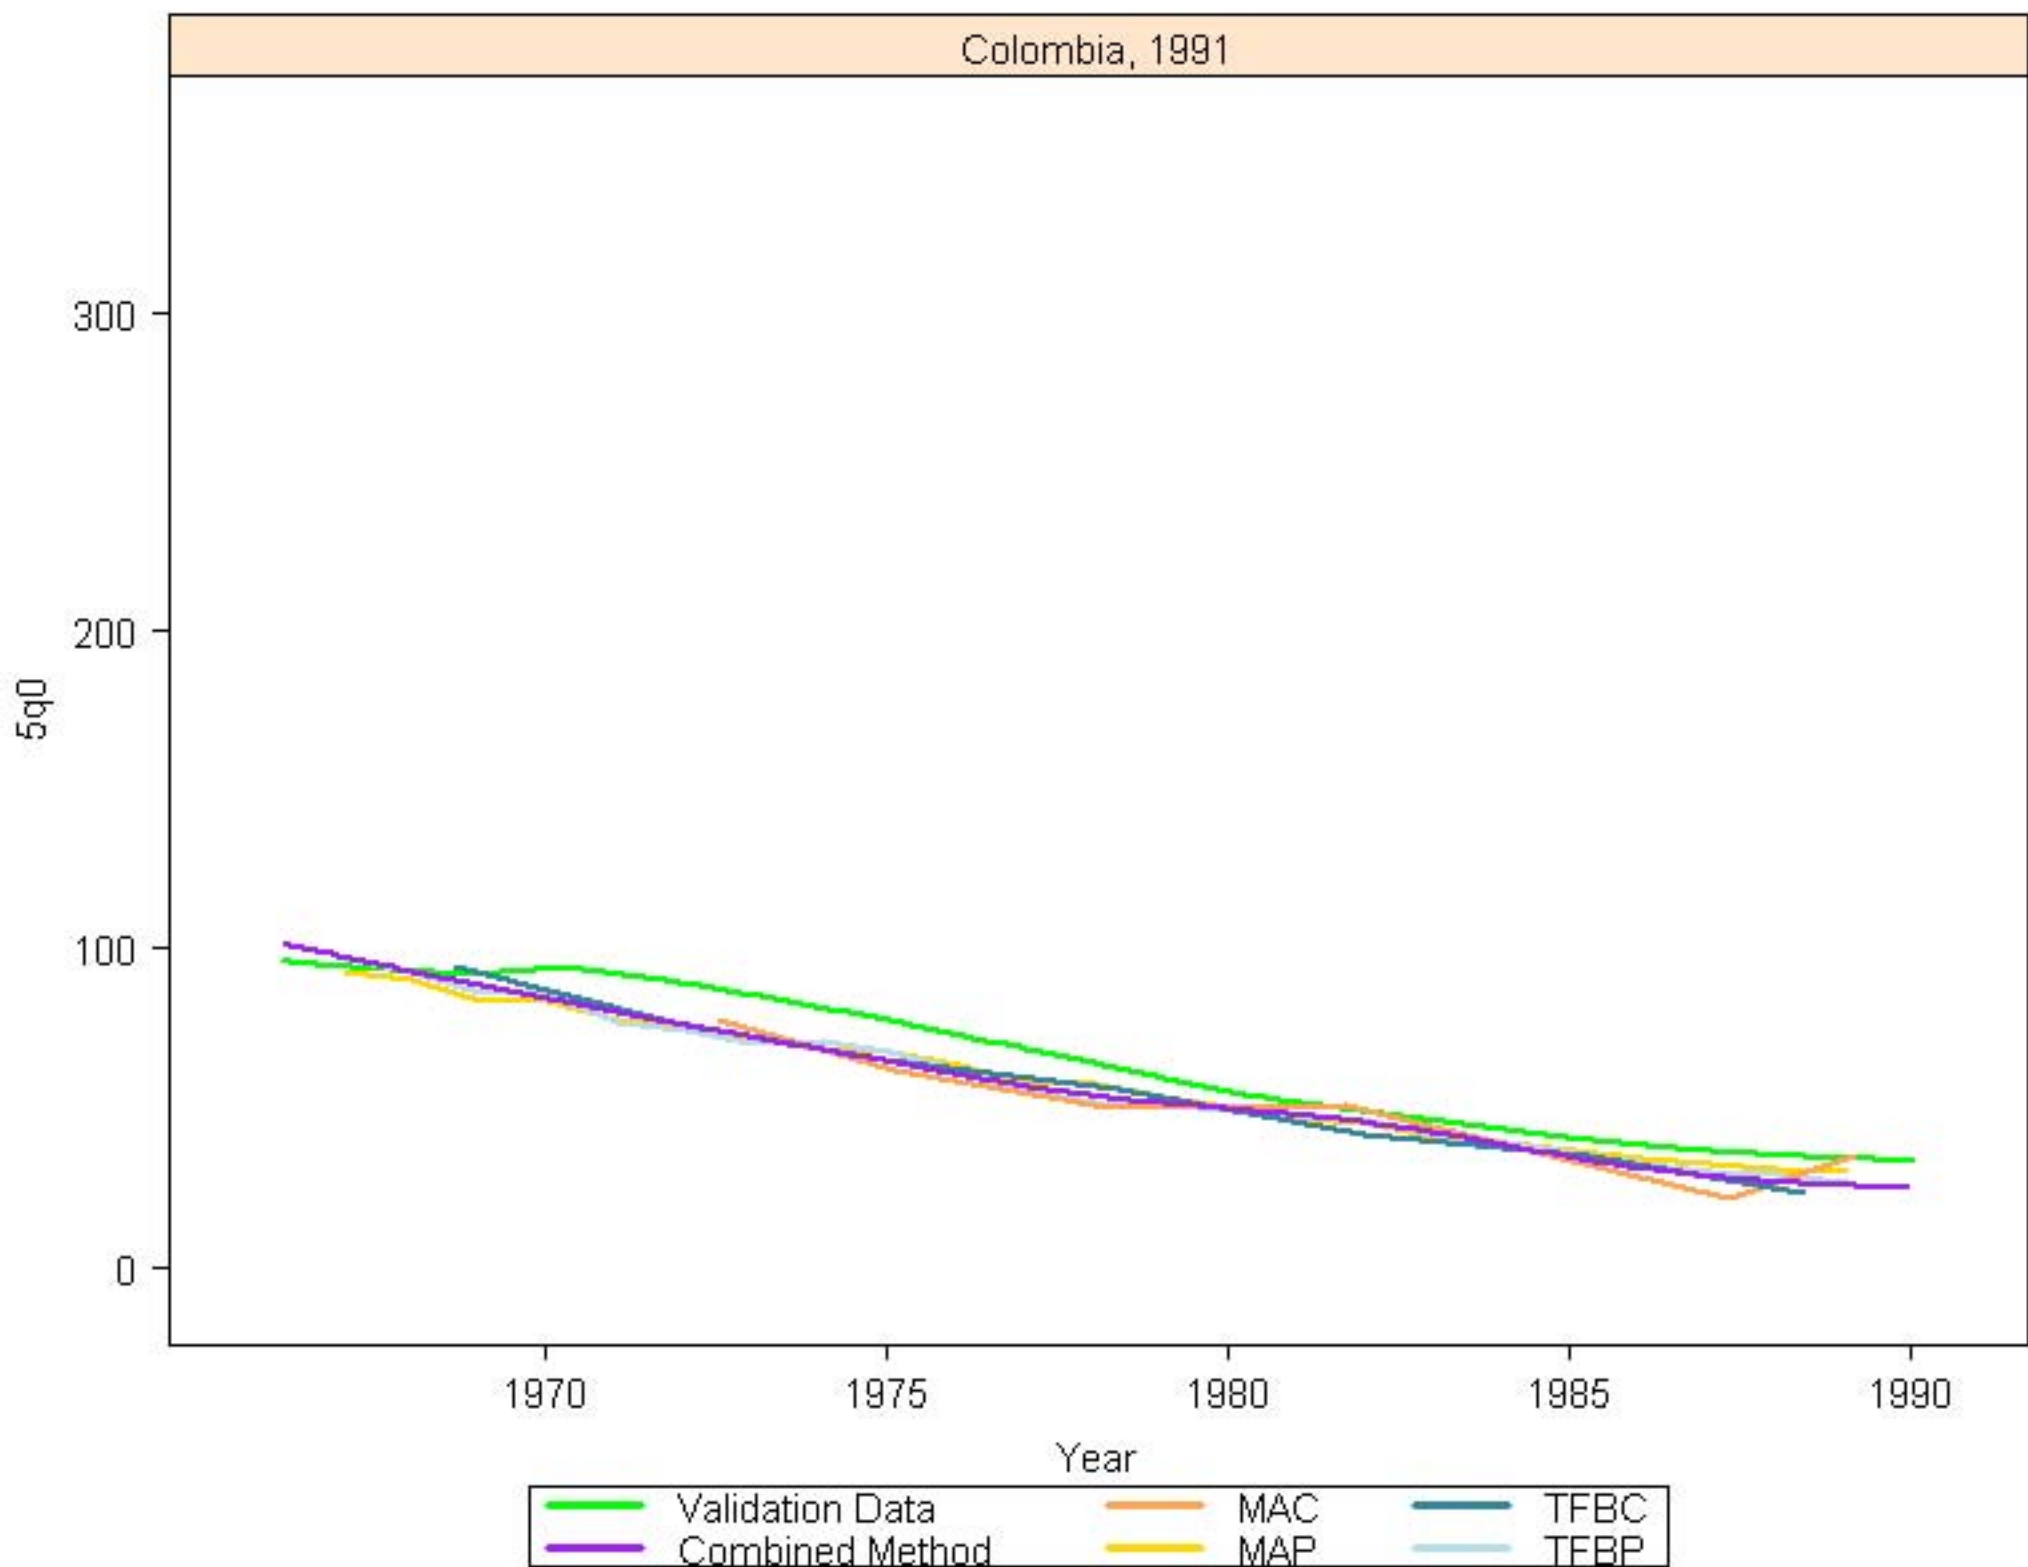

Colombia, 1995

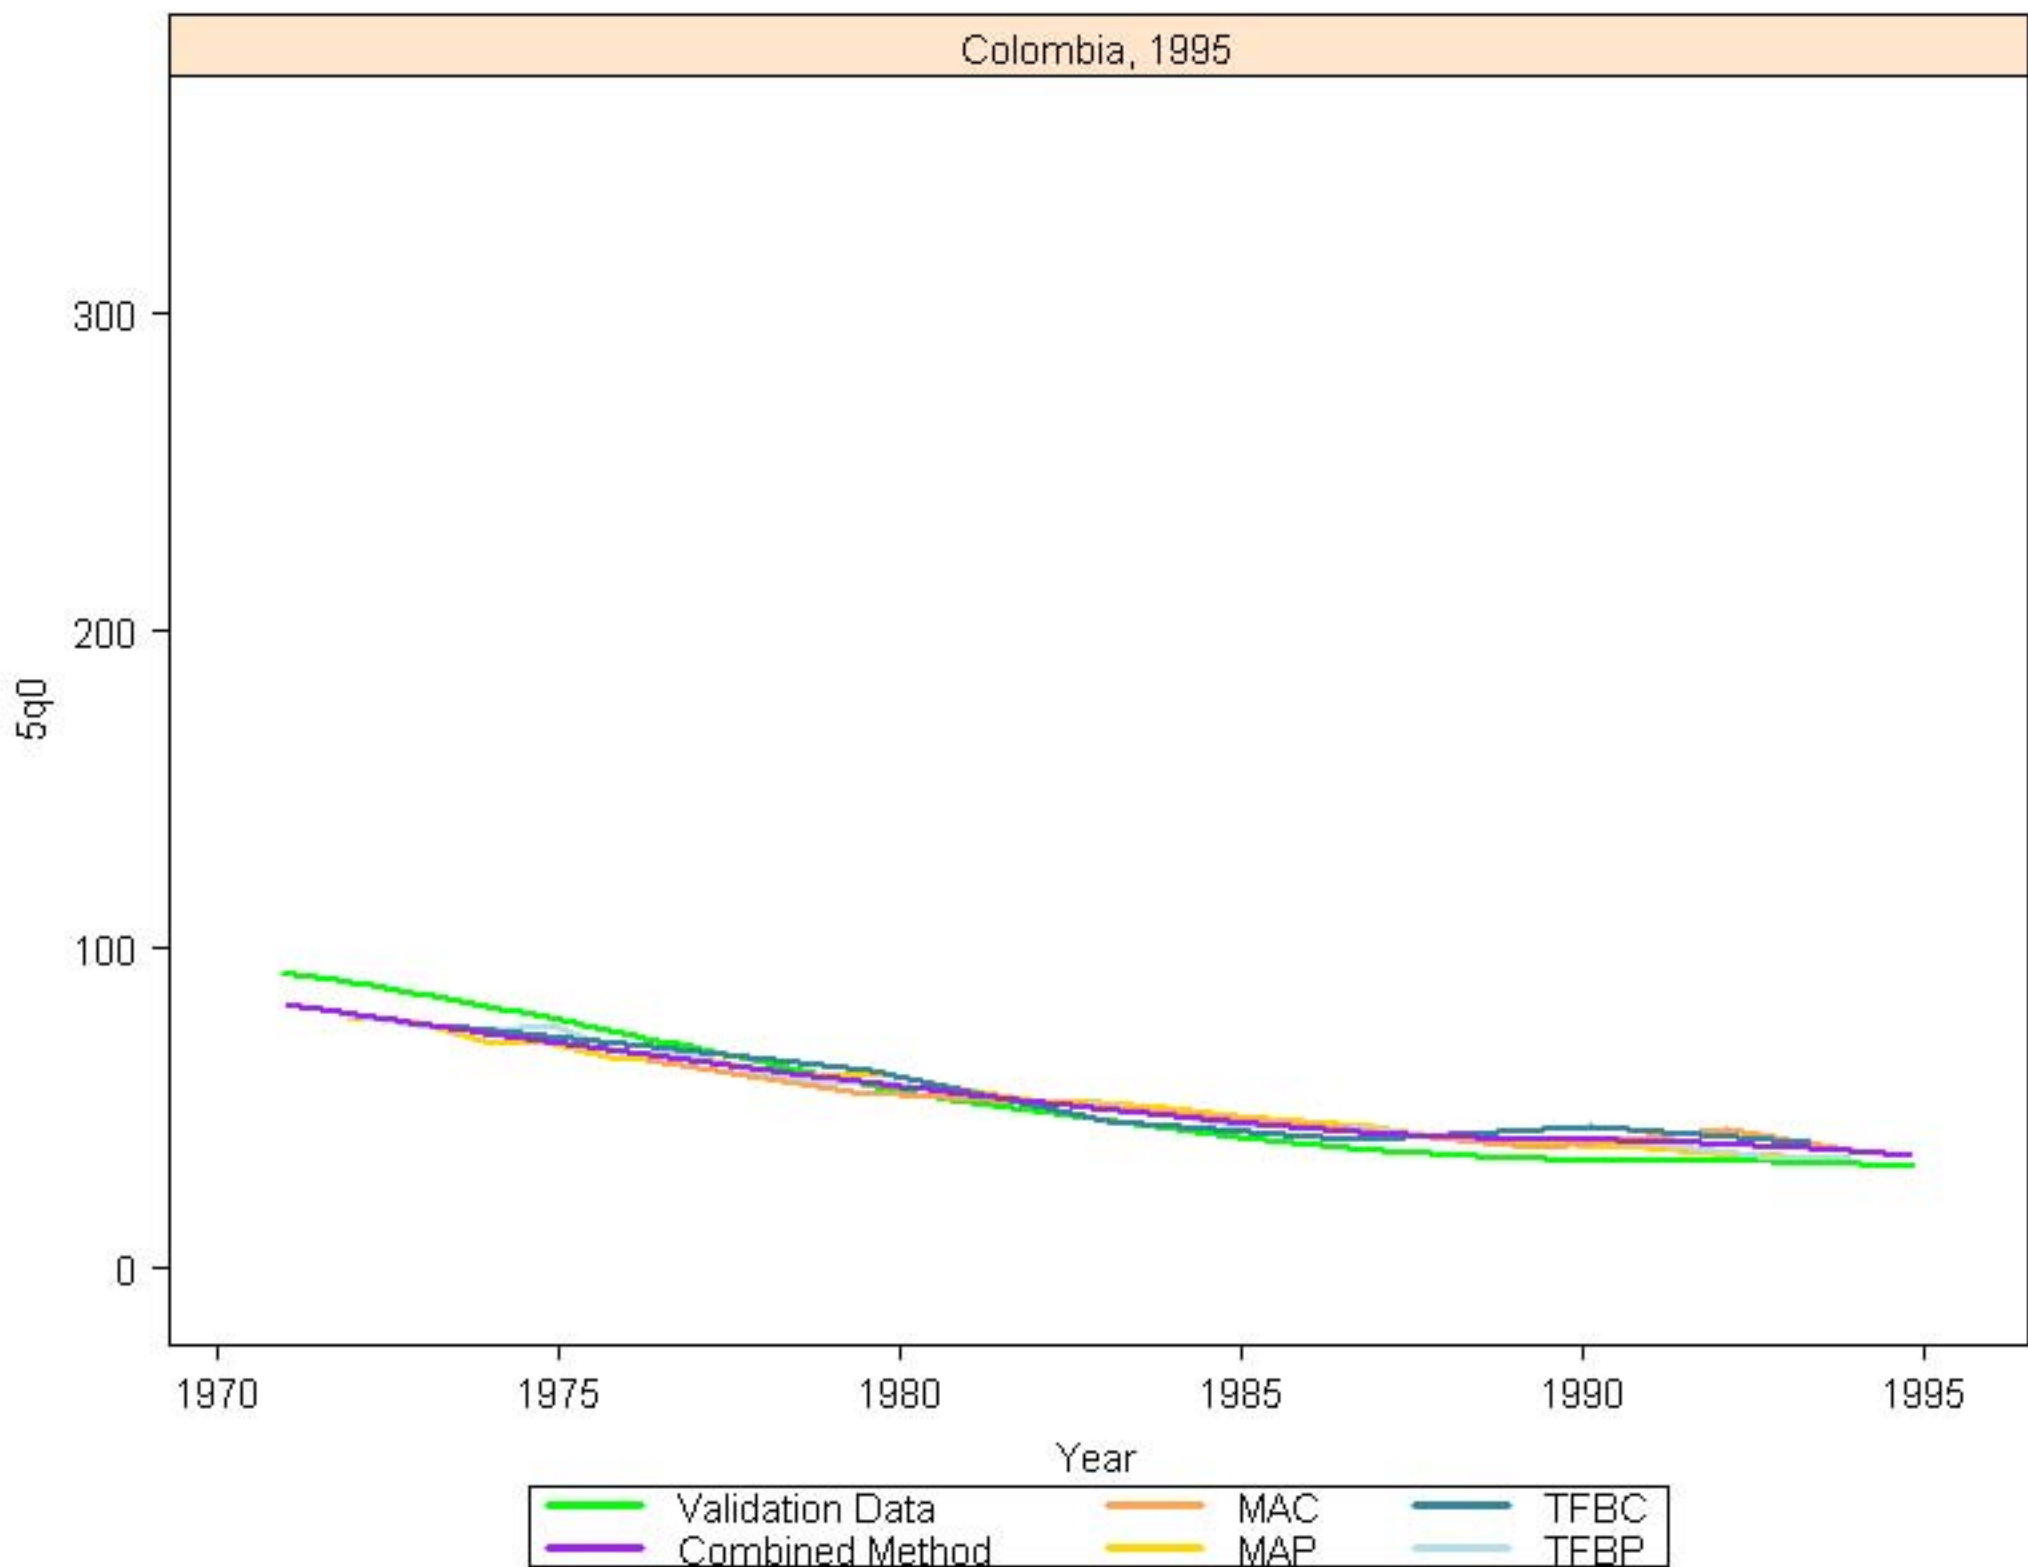



Colombia, 2000

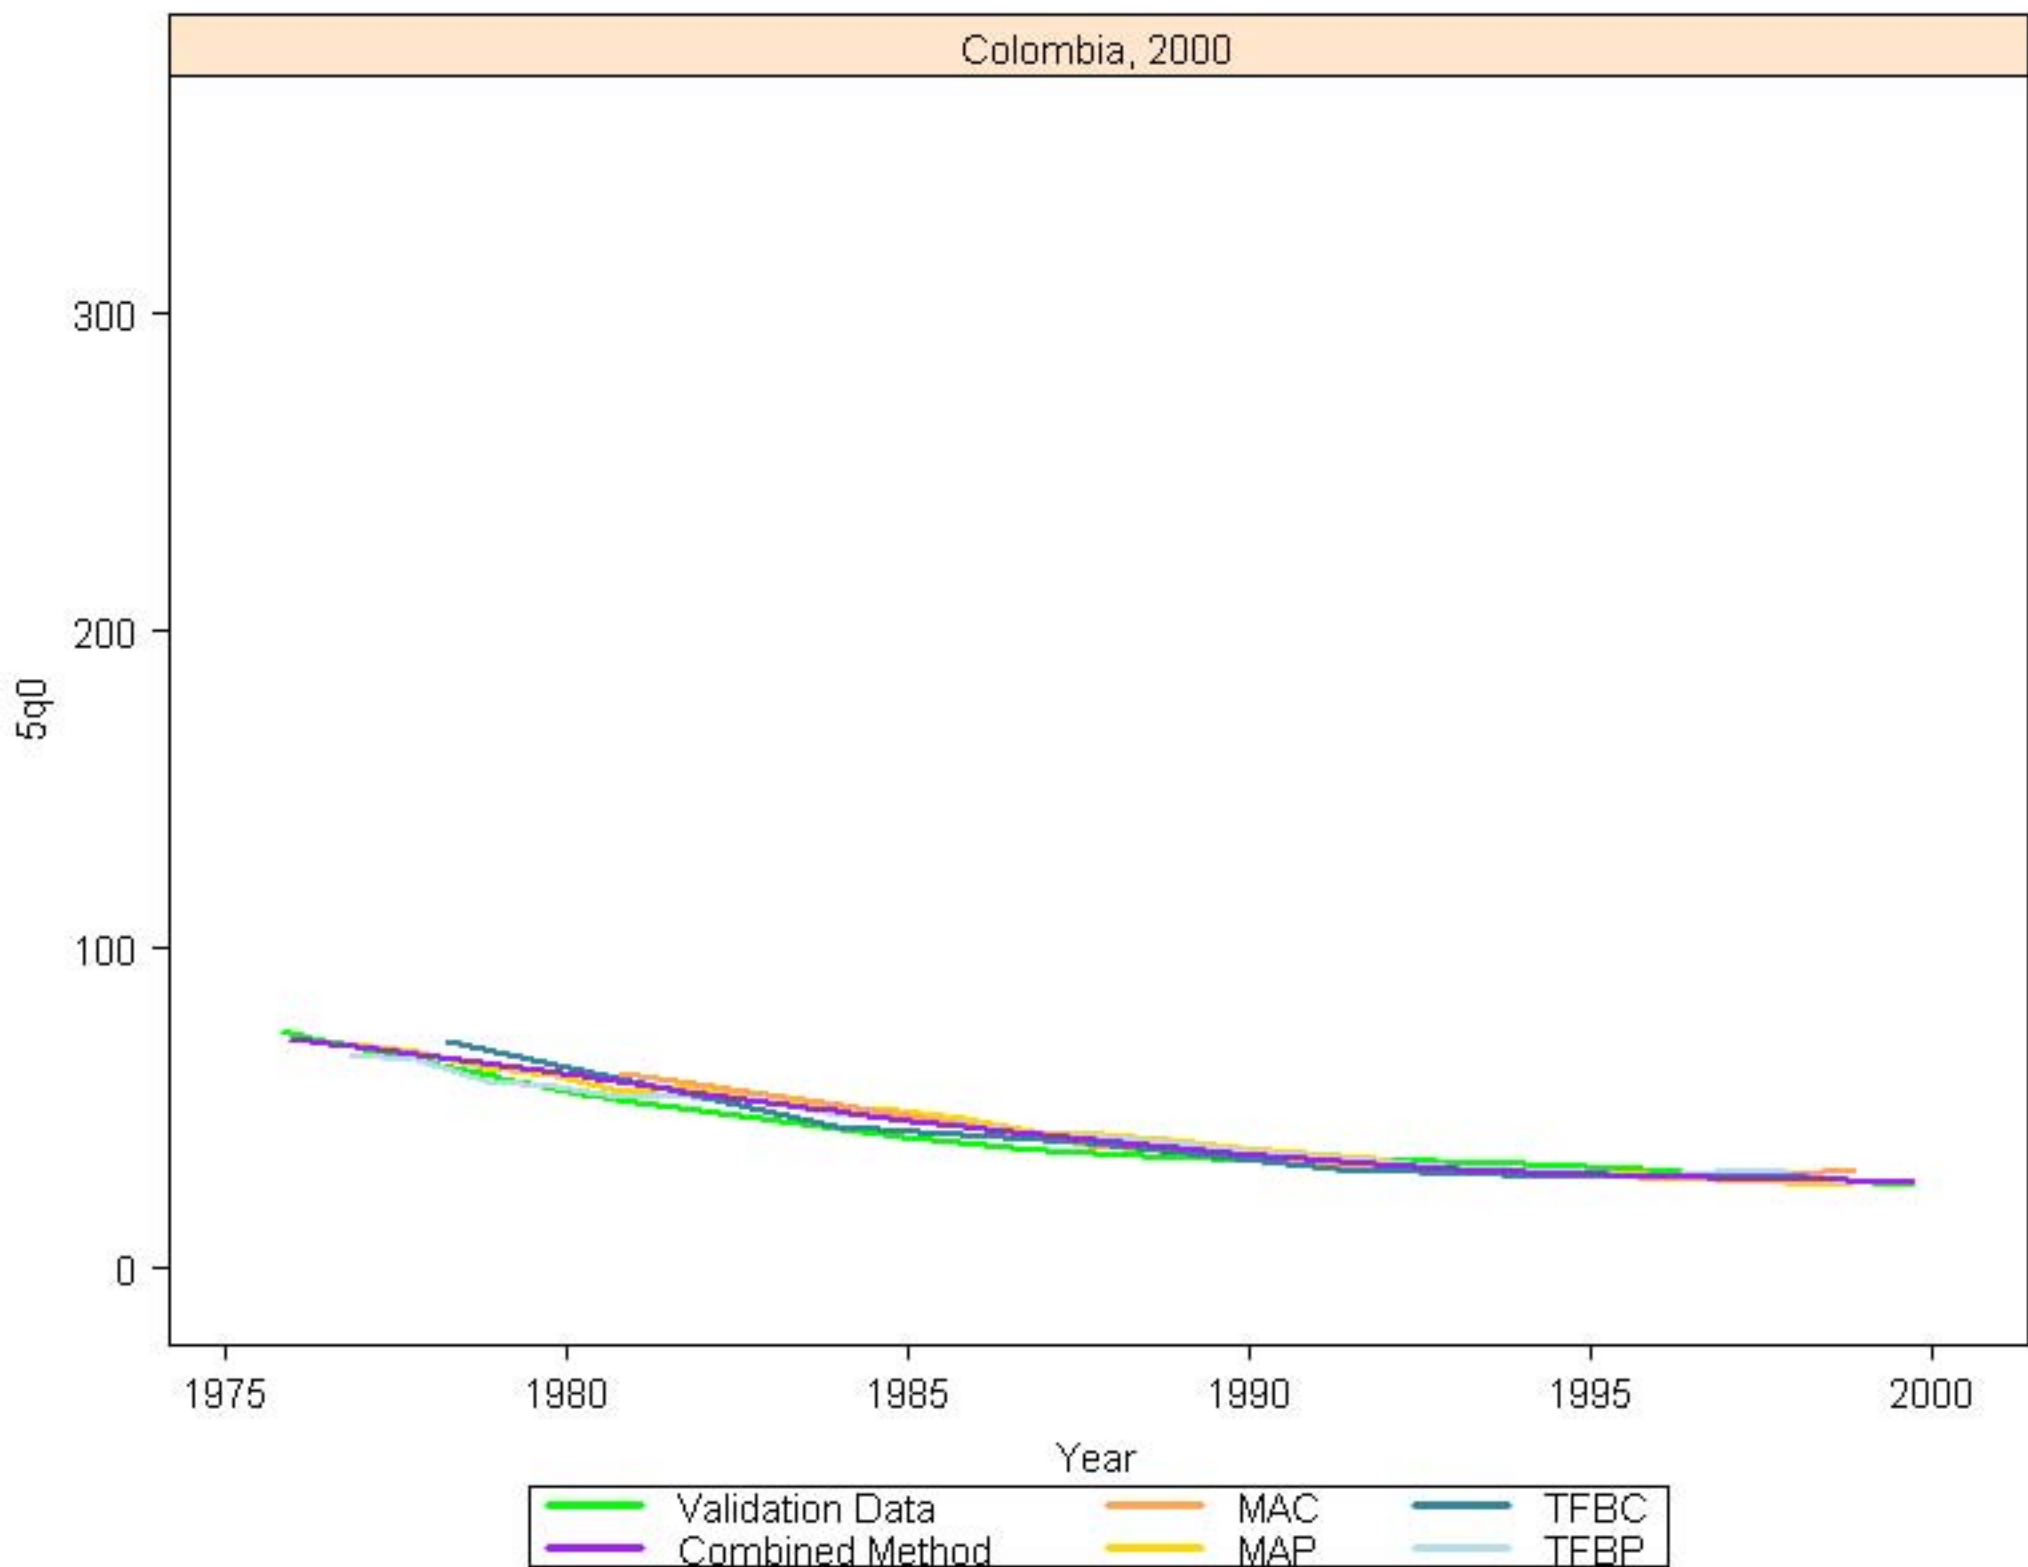

Colombia, 2005

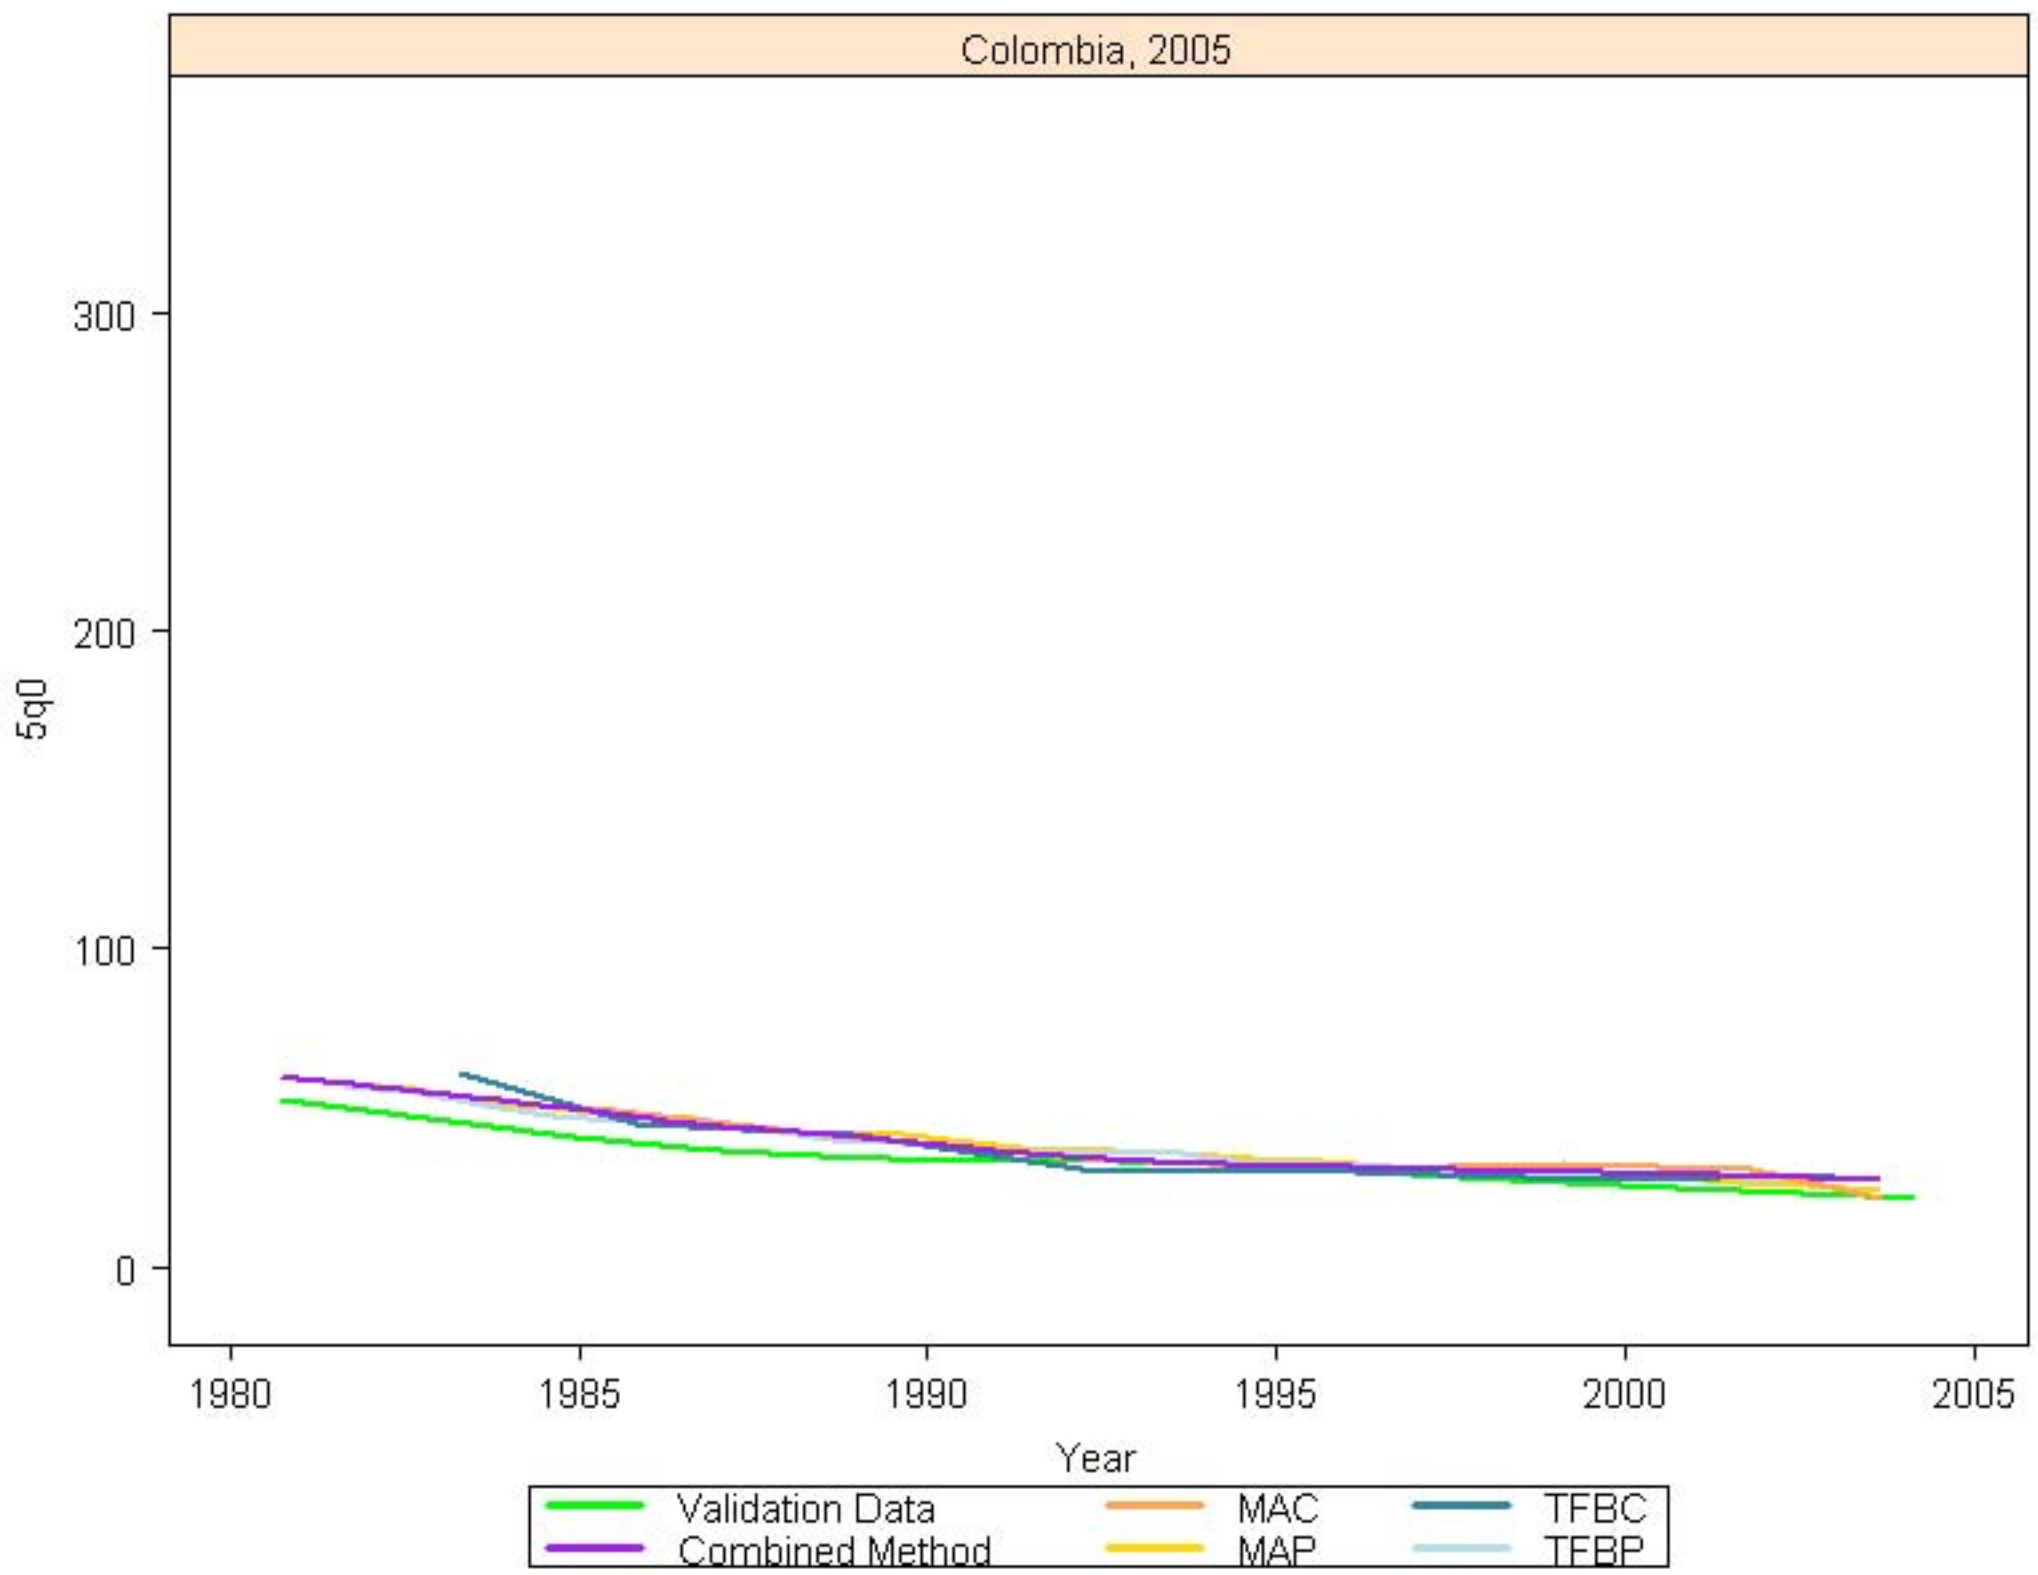

Comoros, 1996

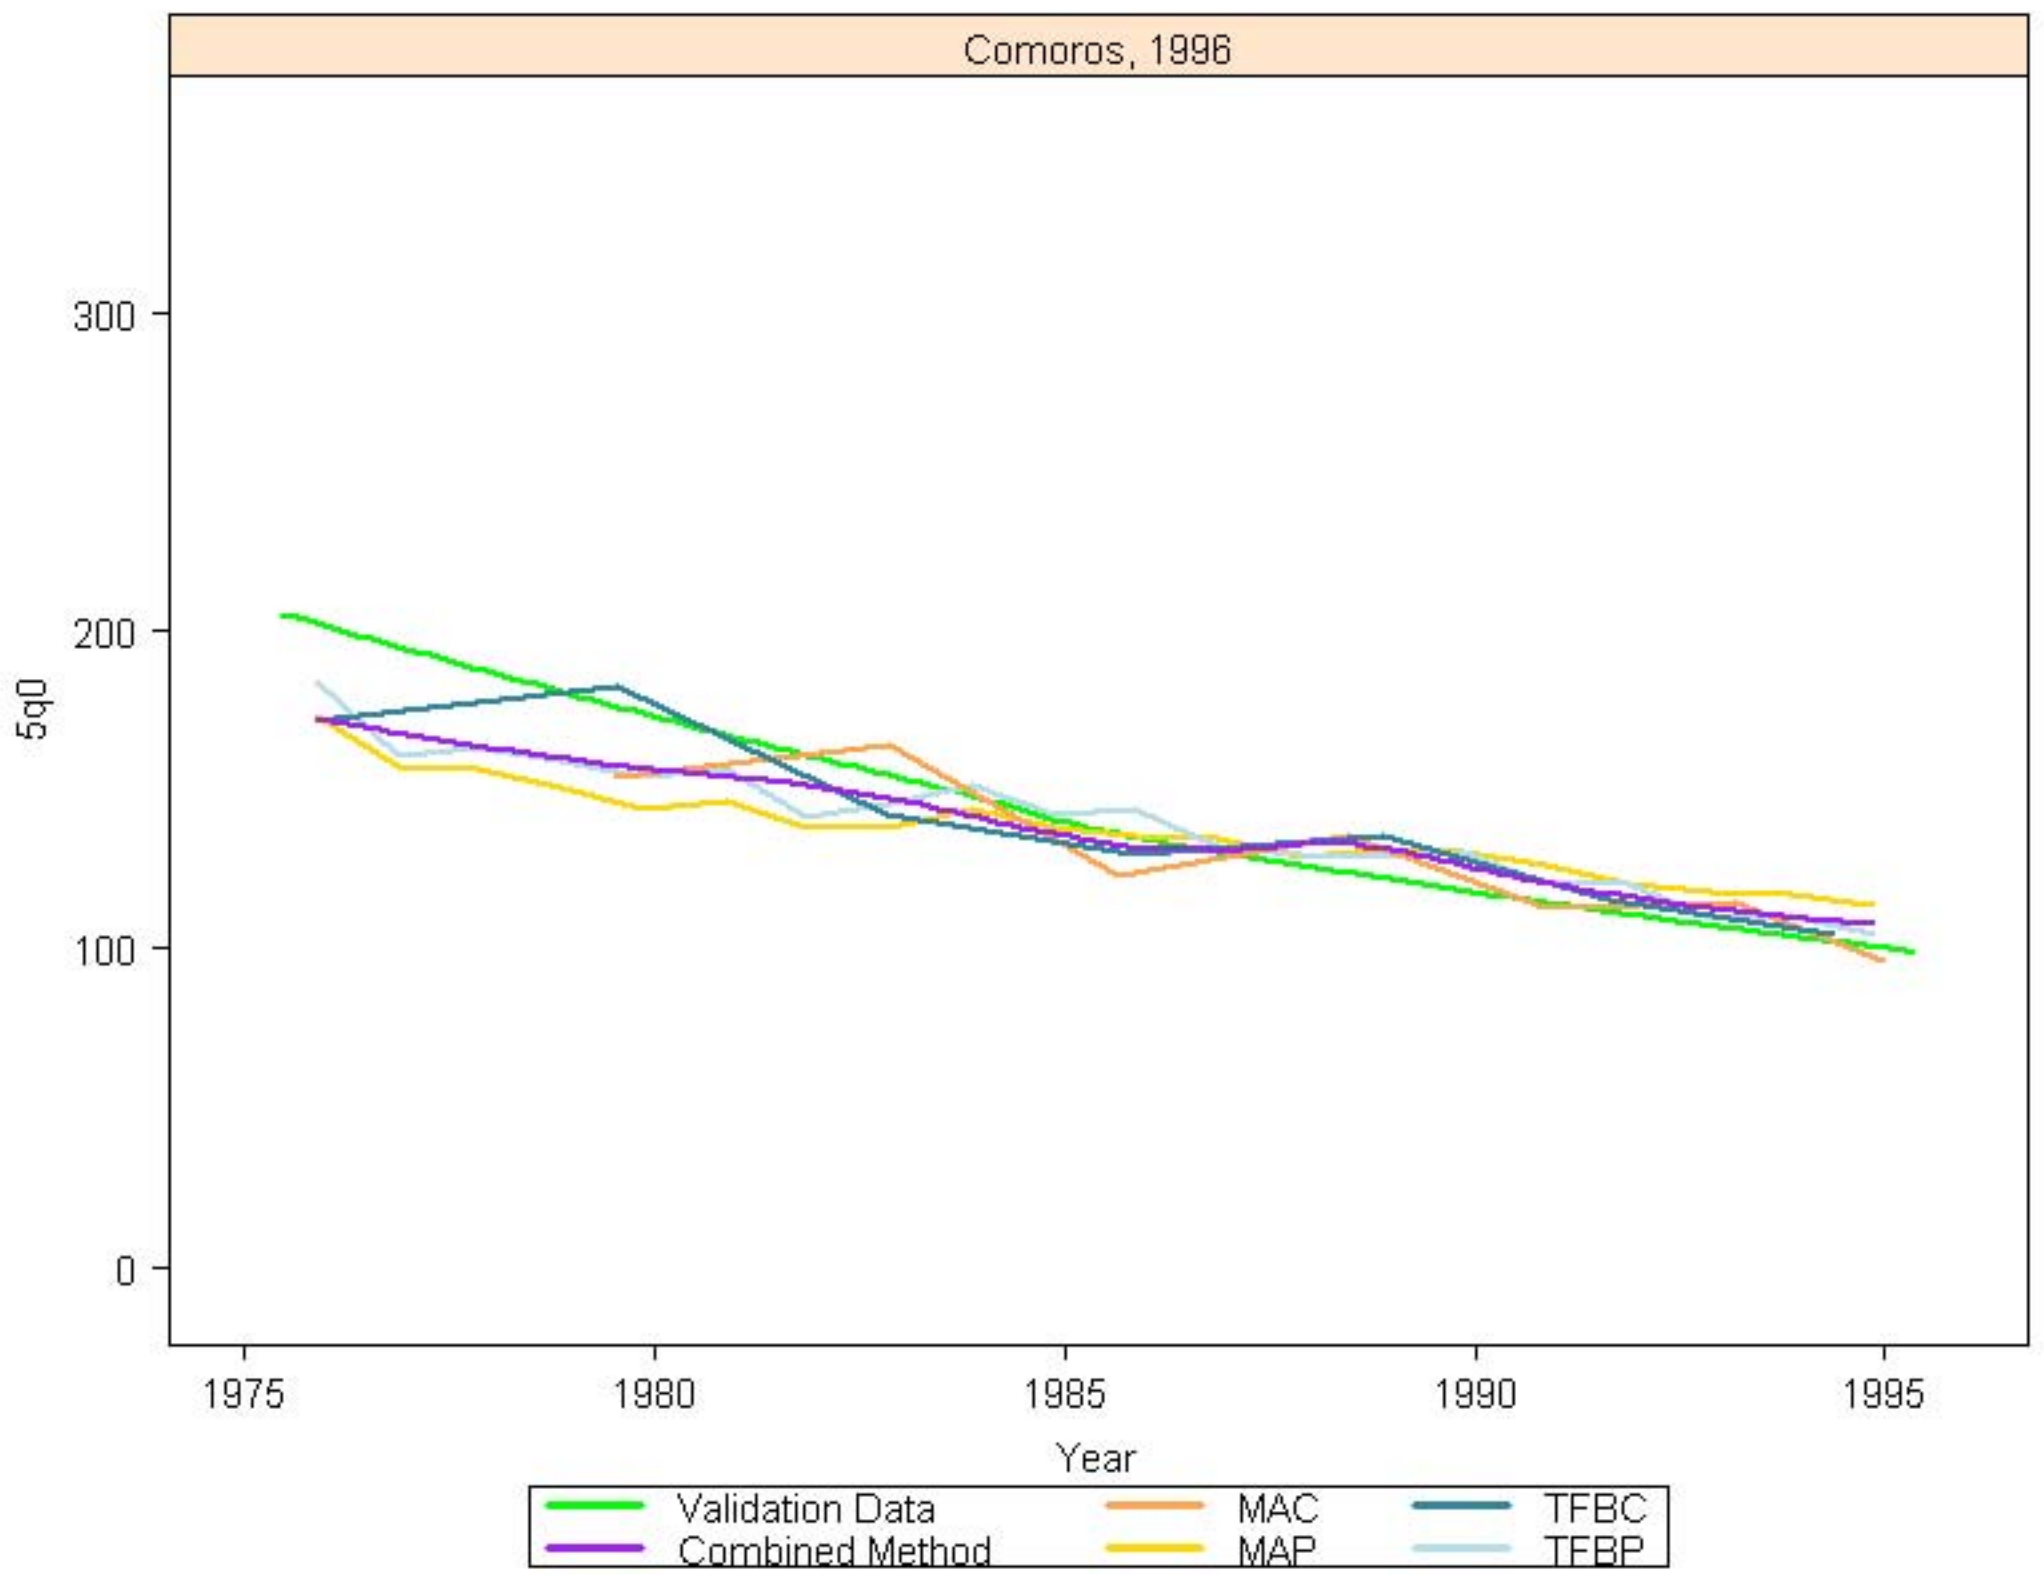

Congo (Brazzaville), 2006

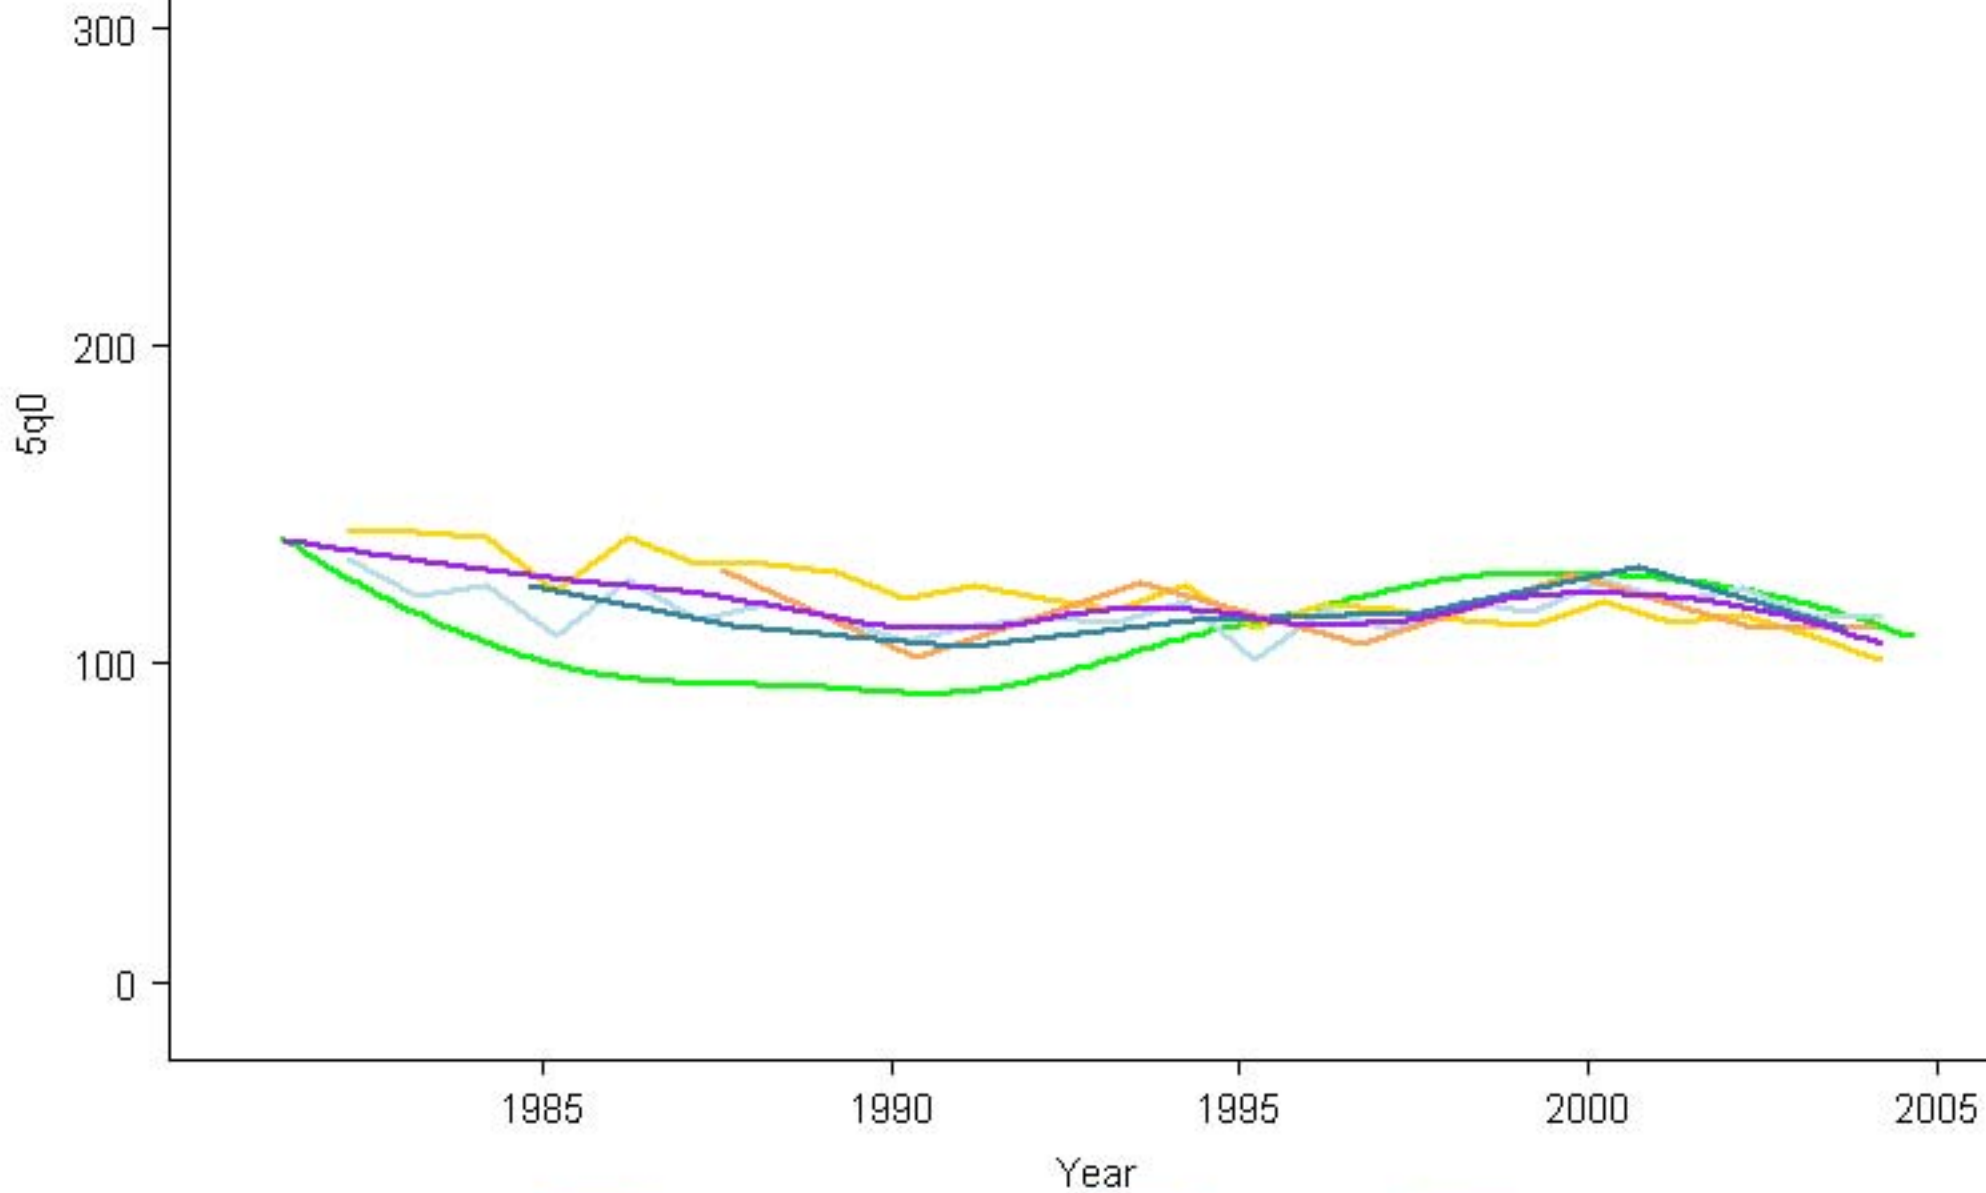

Cote d'Ivoire, 1995

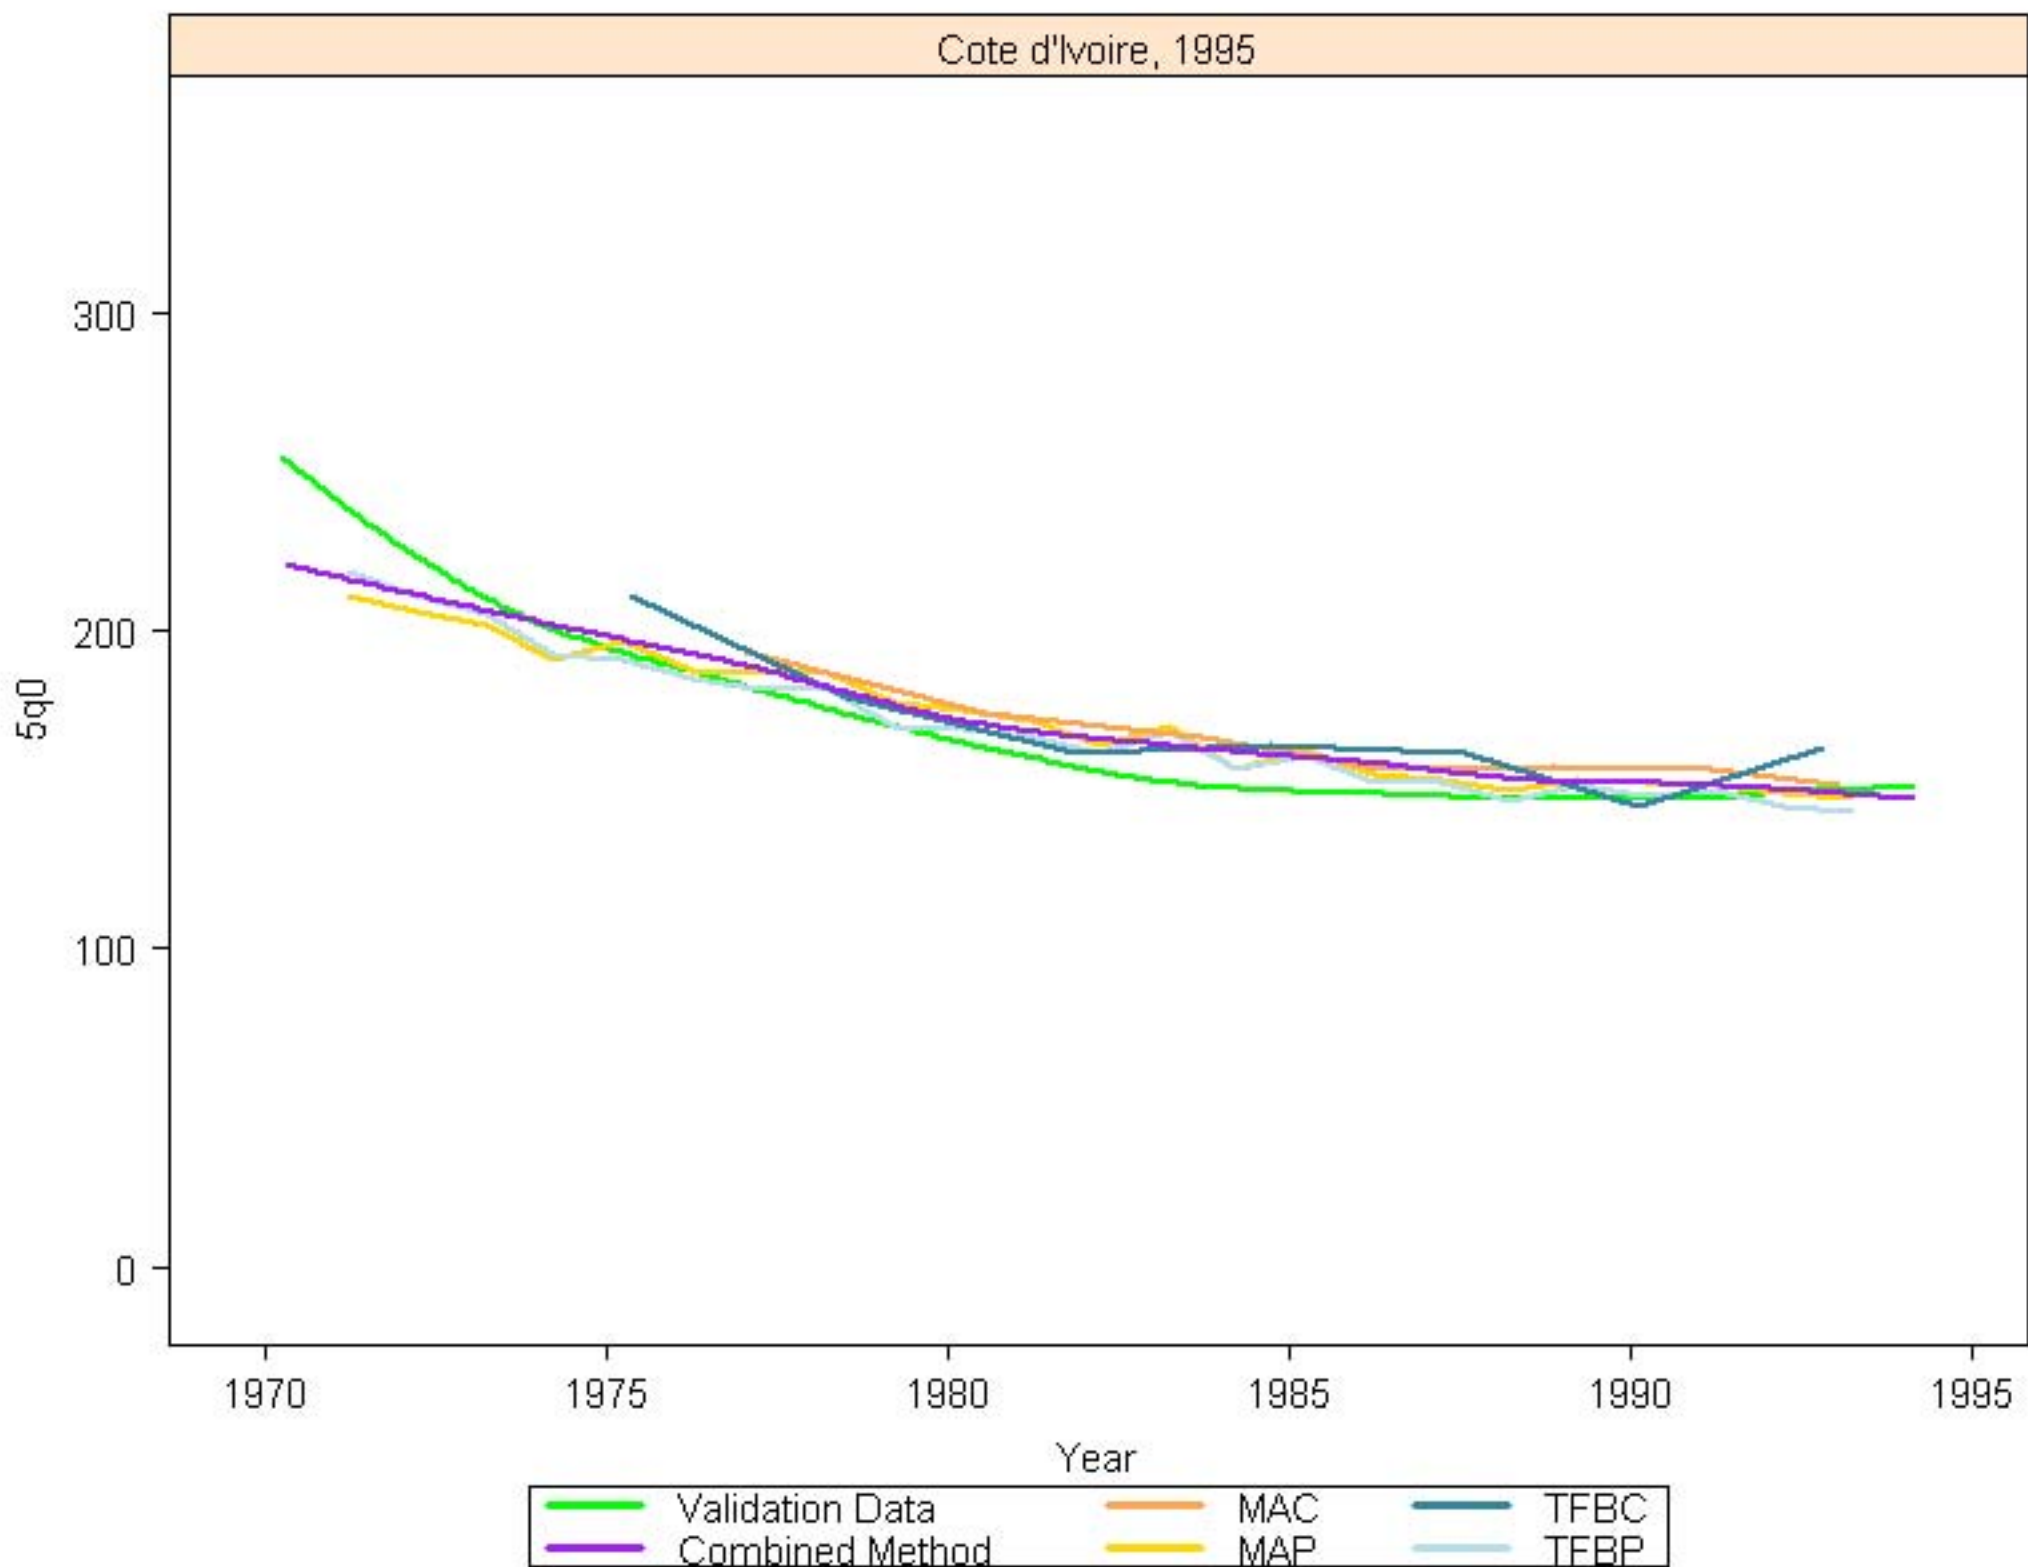

Cote d'Ivoire, 1999

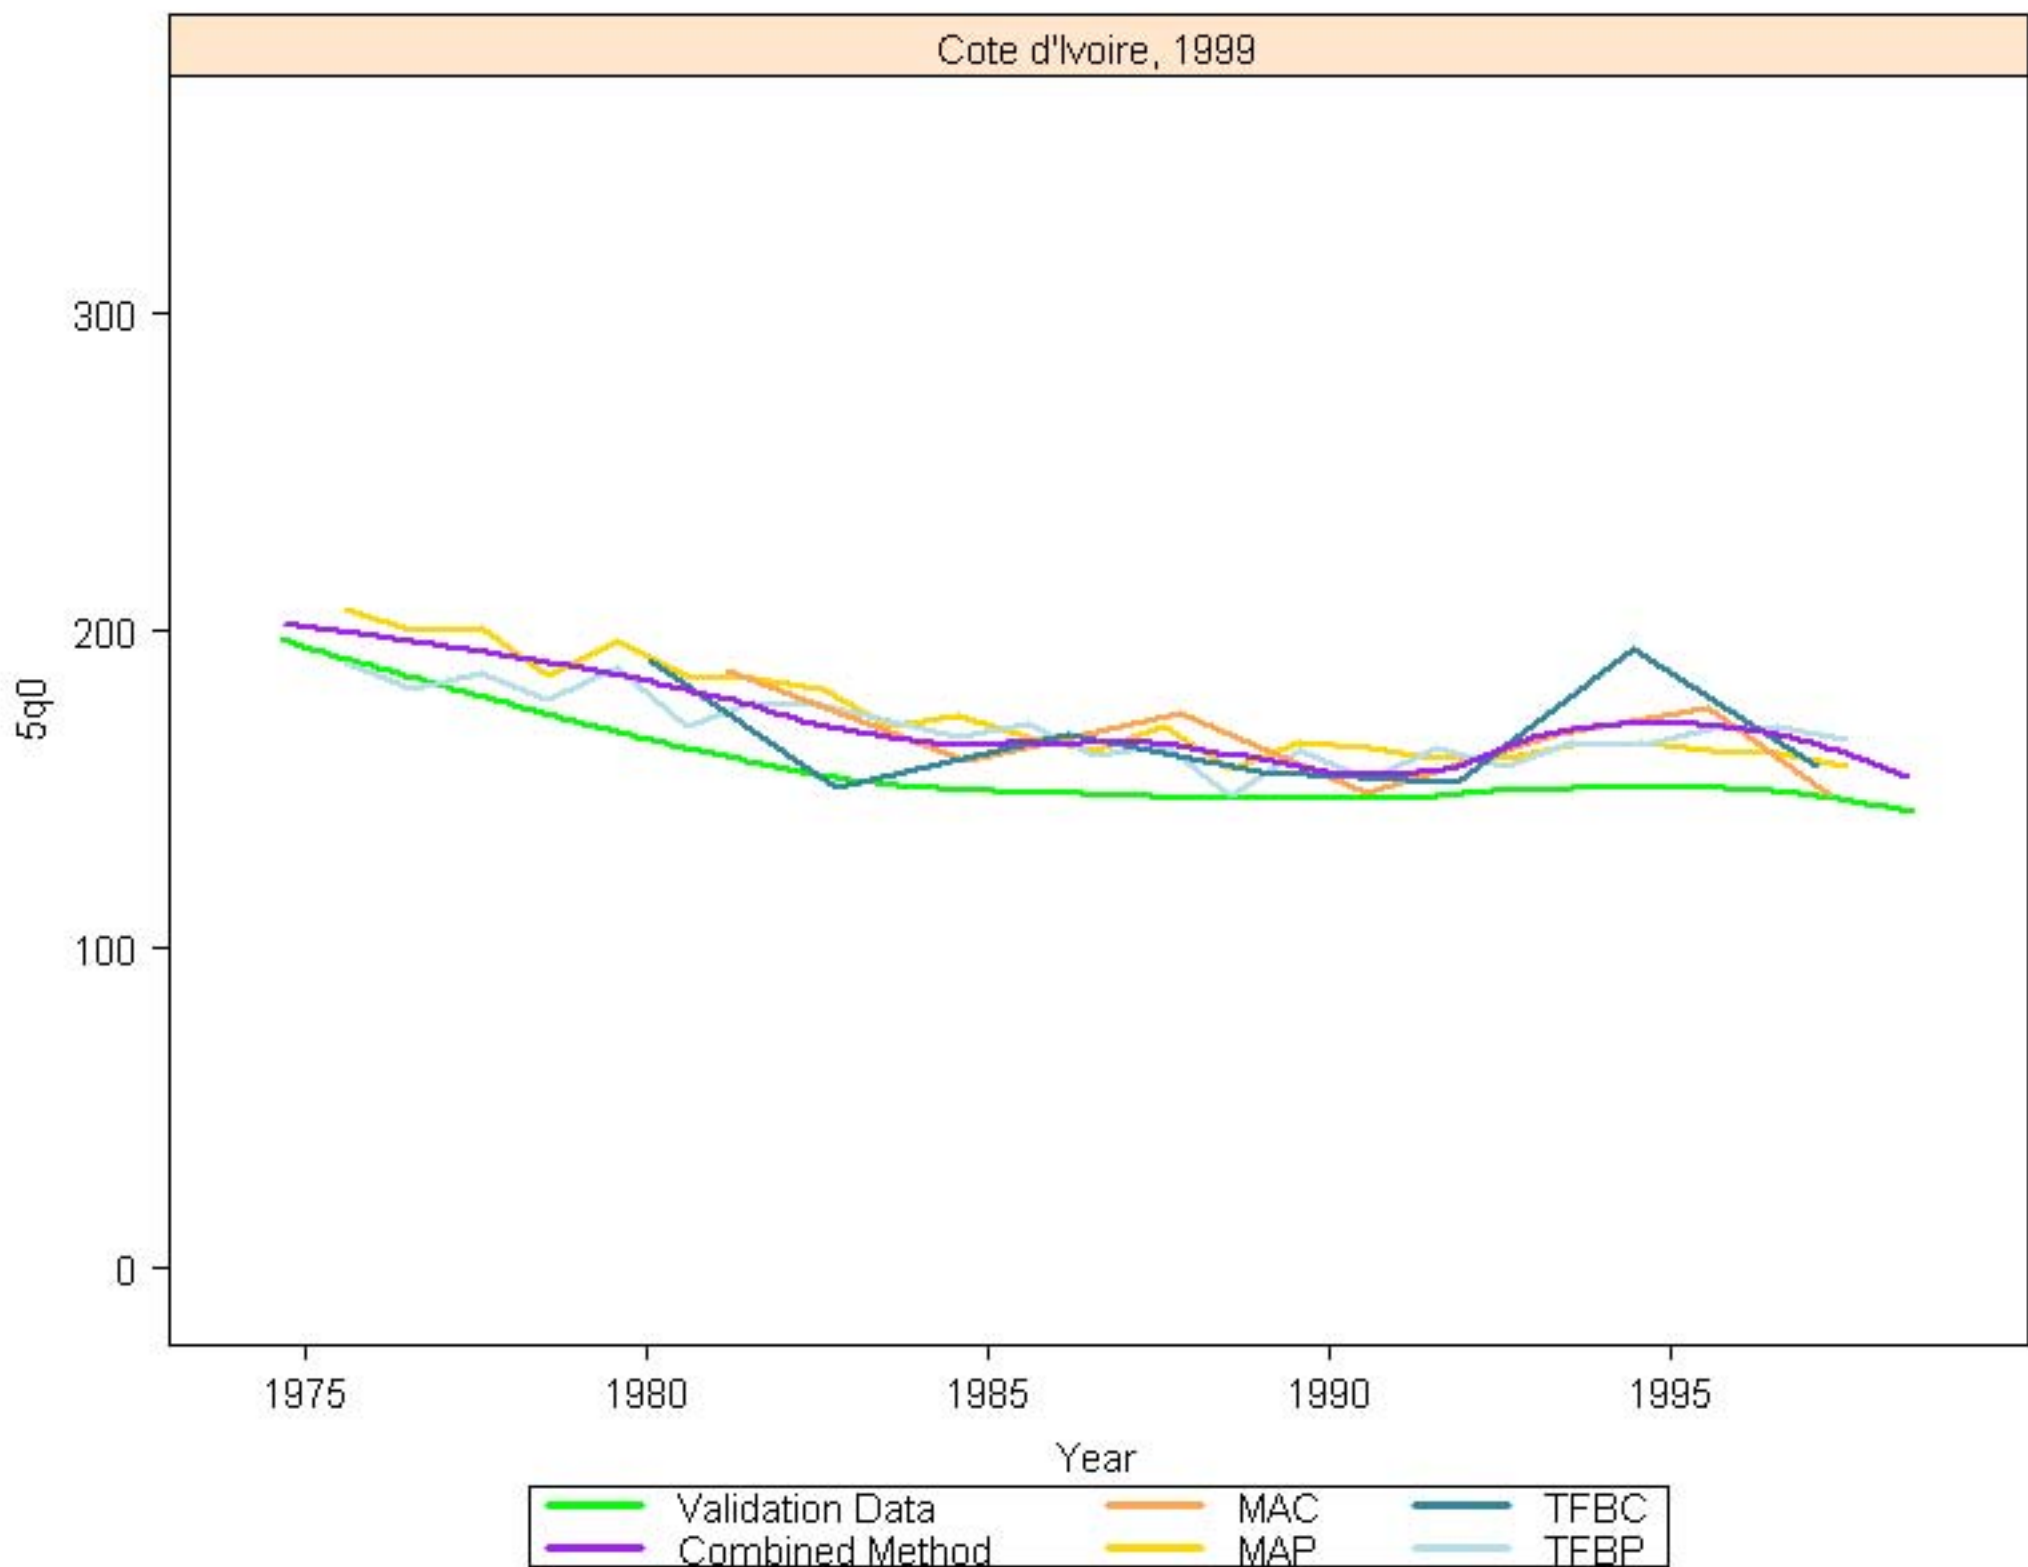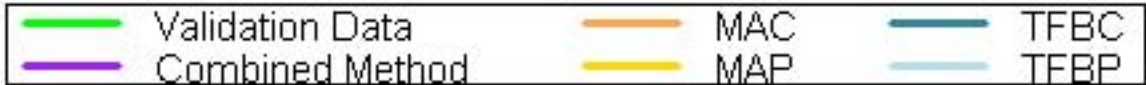

Cote d'Ivoire, 2006

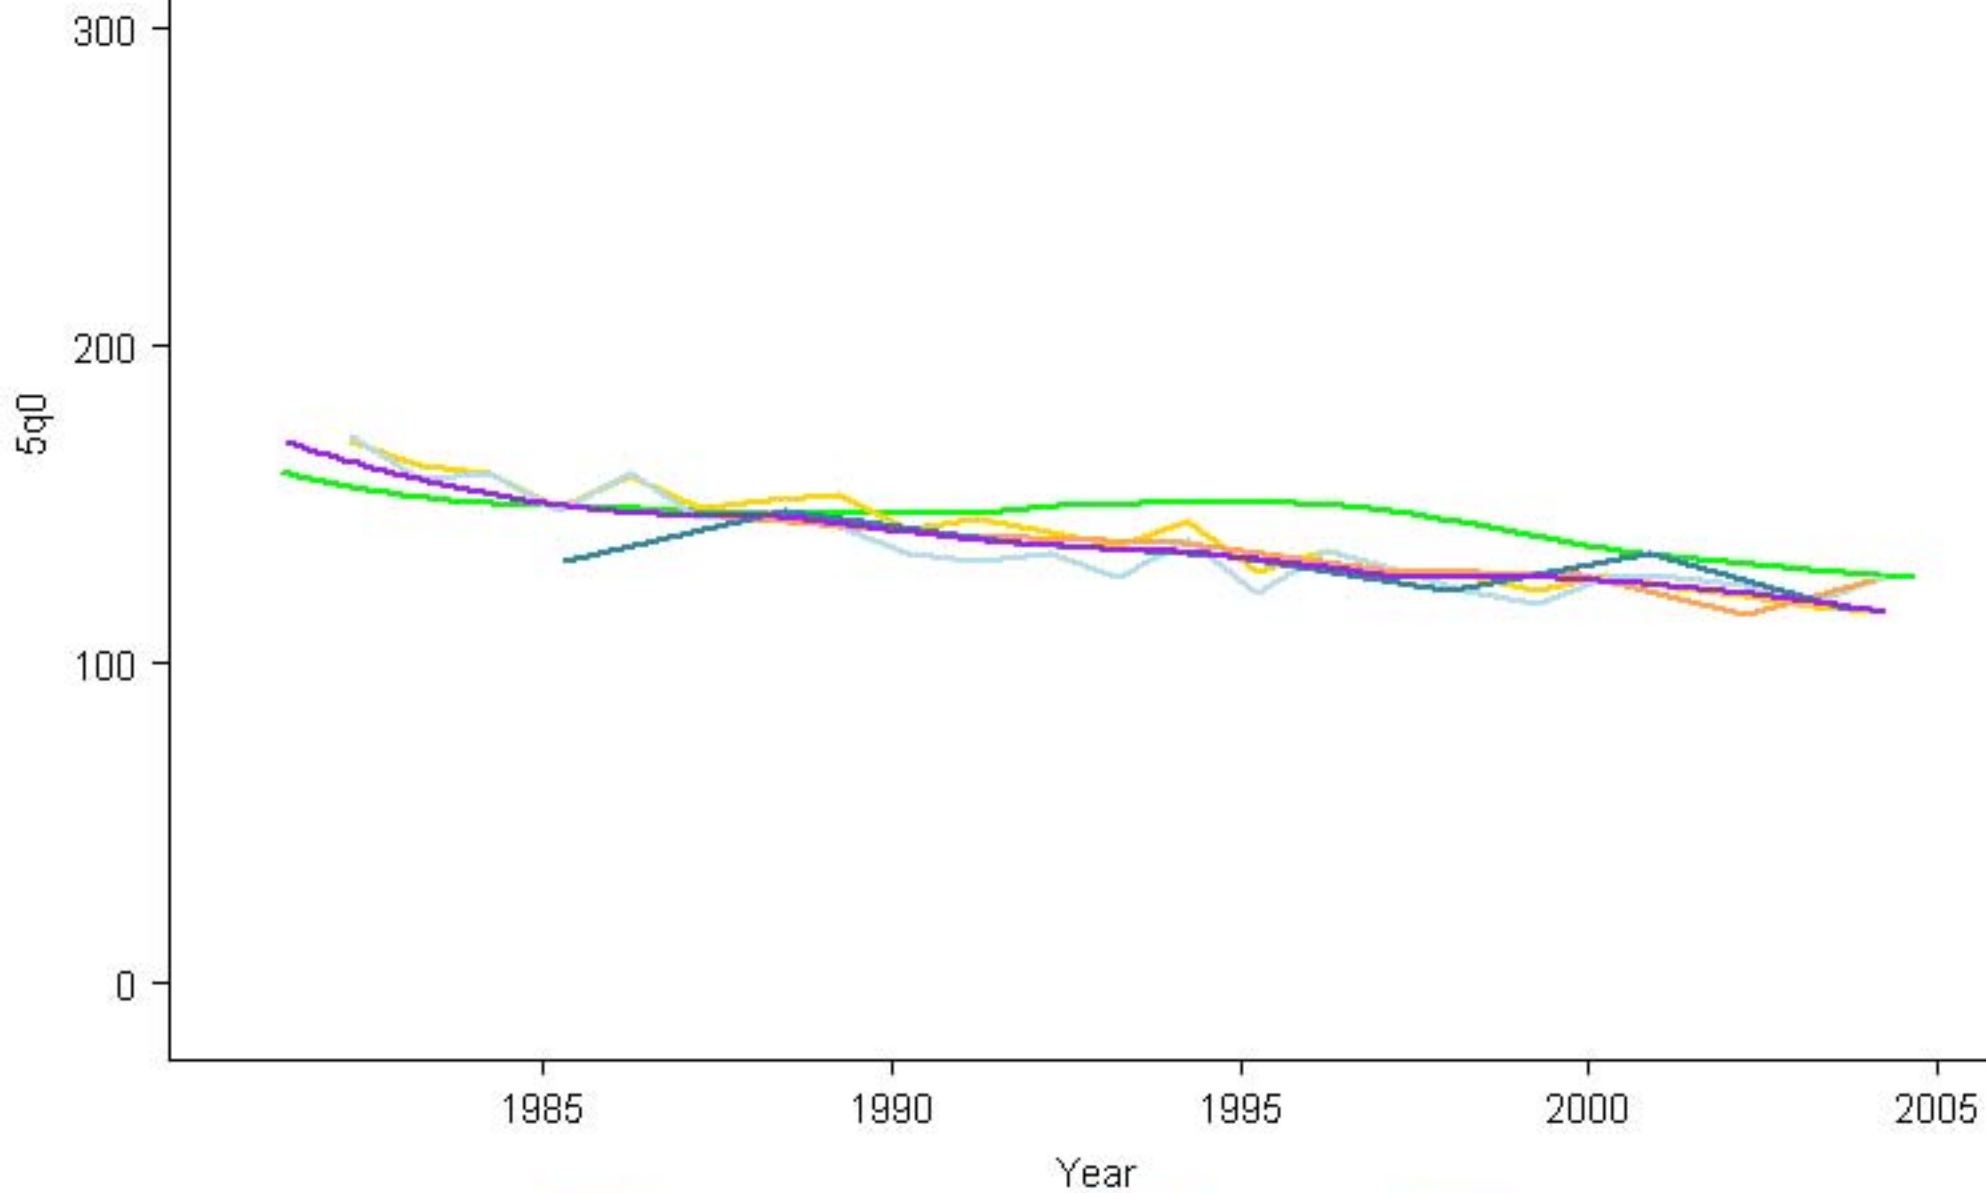

Dominican Republic, 1987

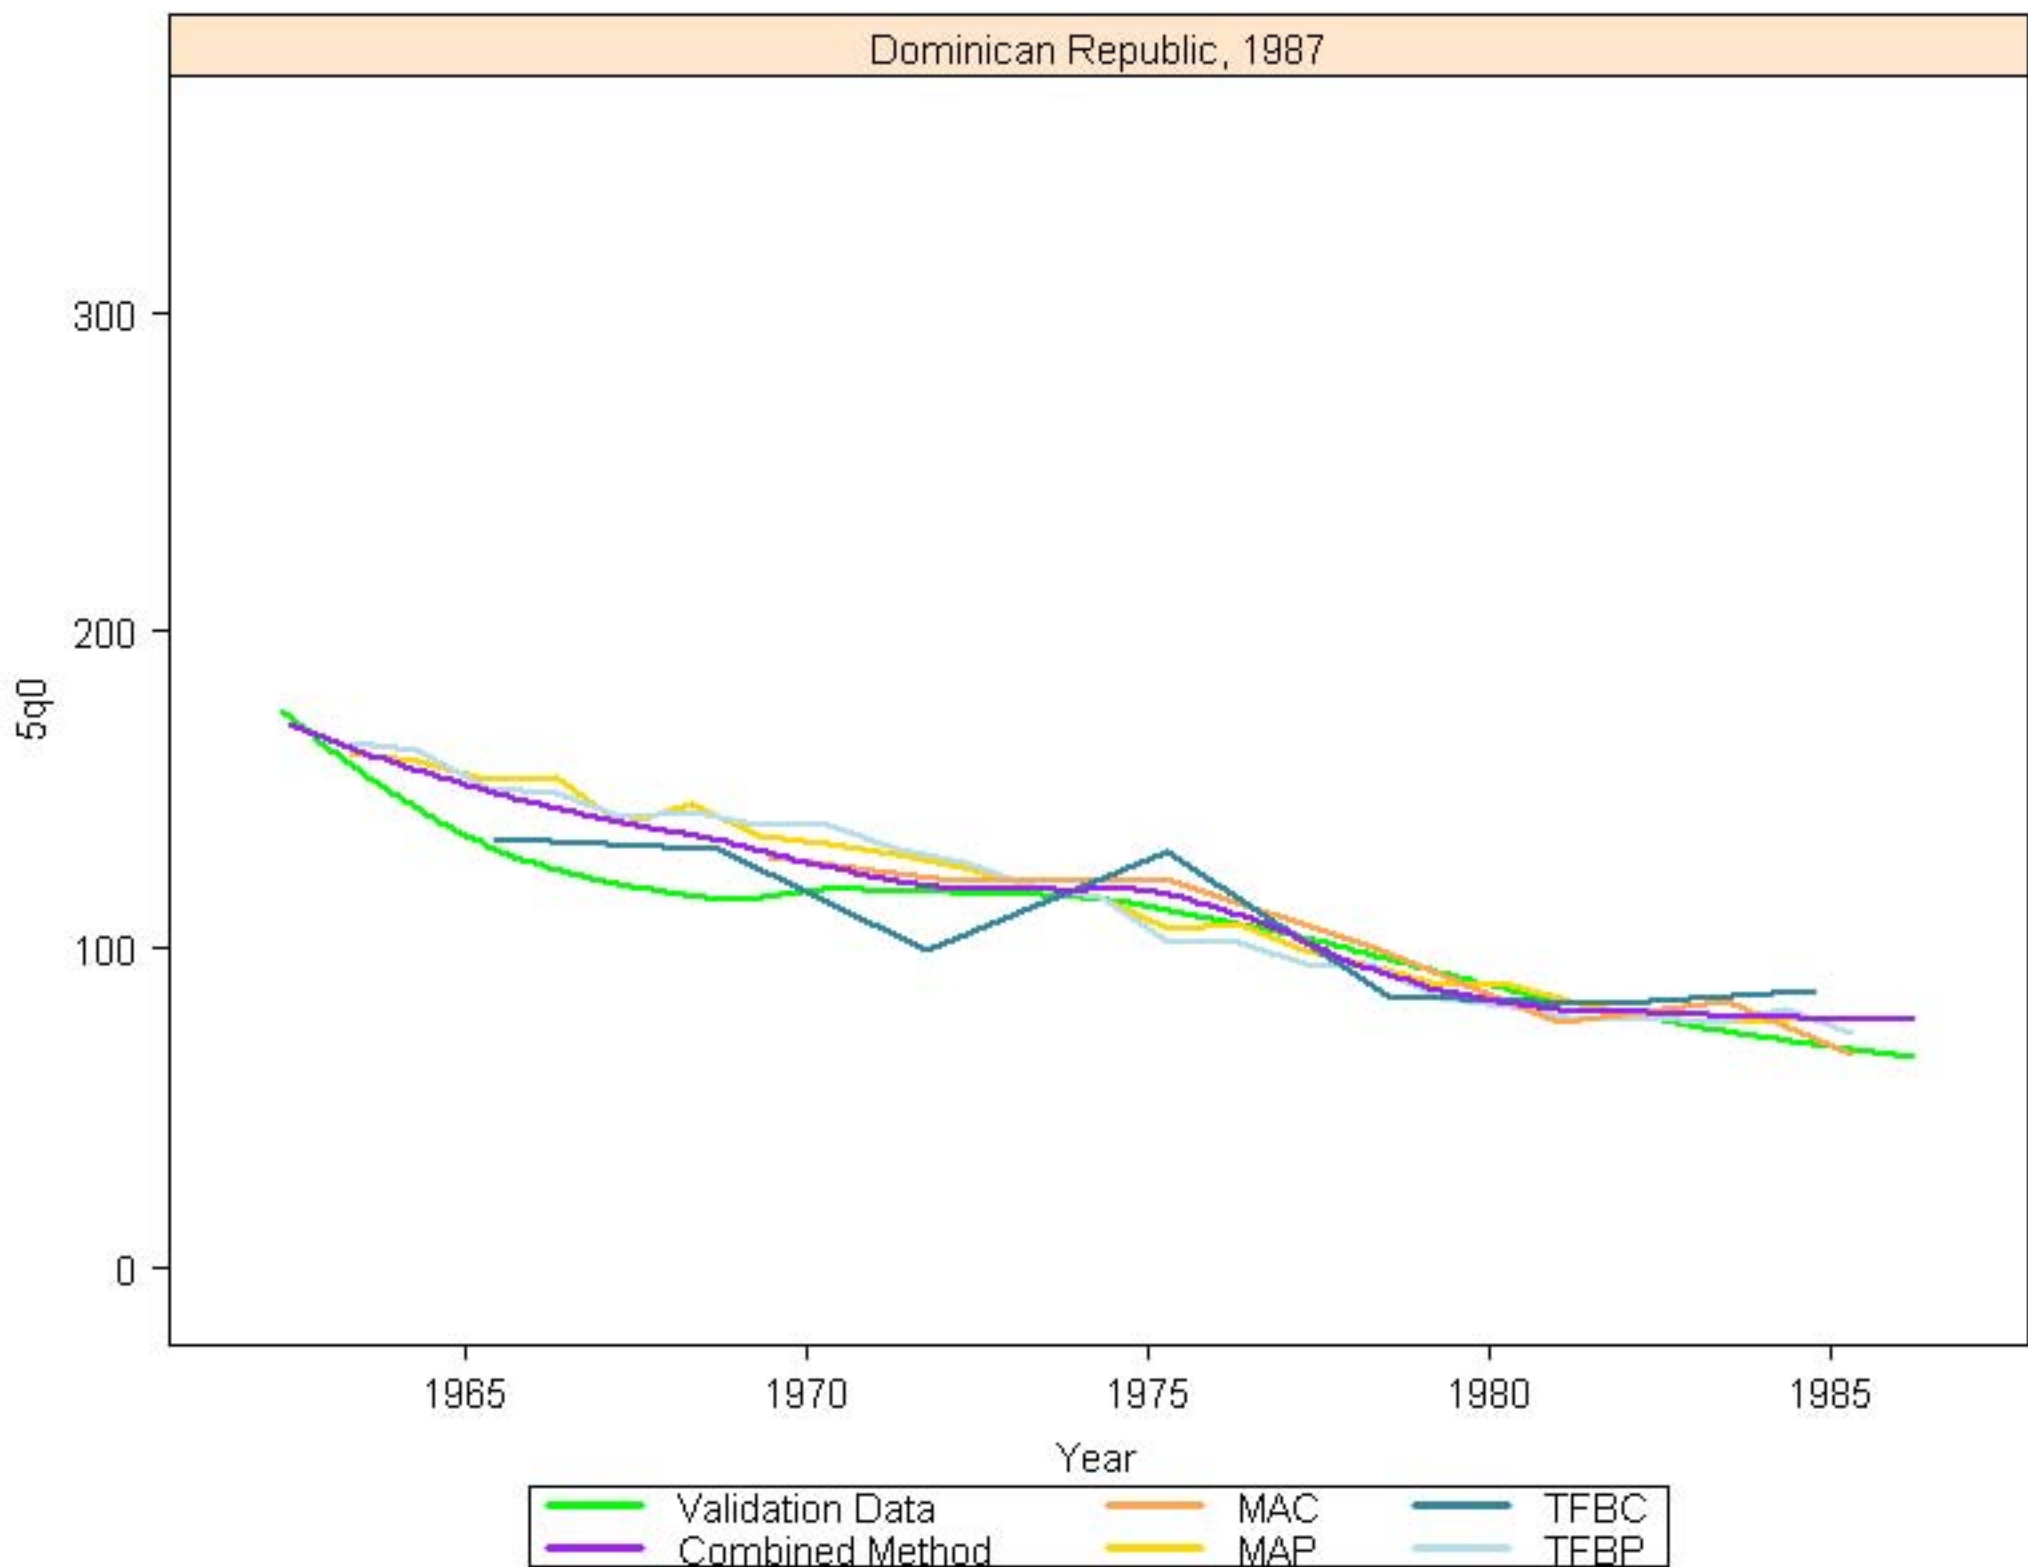



Dominican Republic, 1992

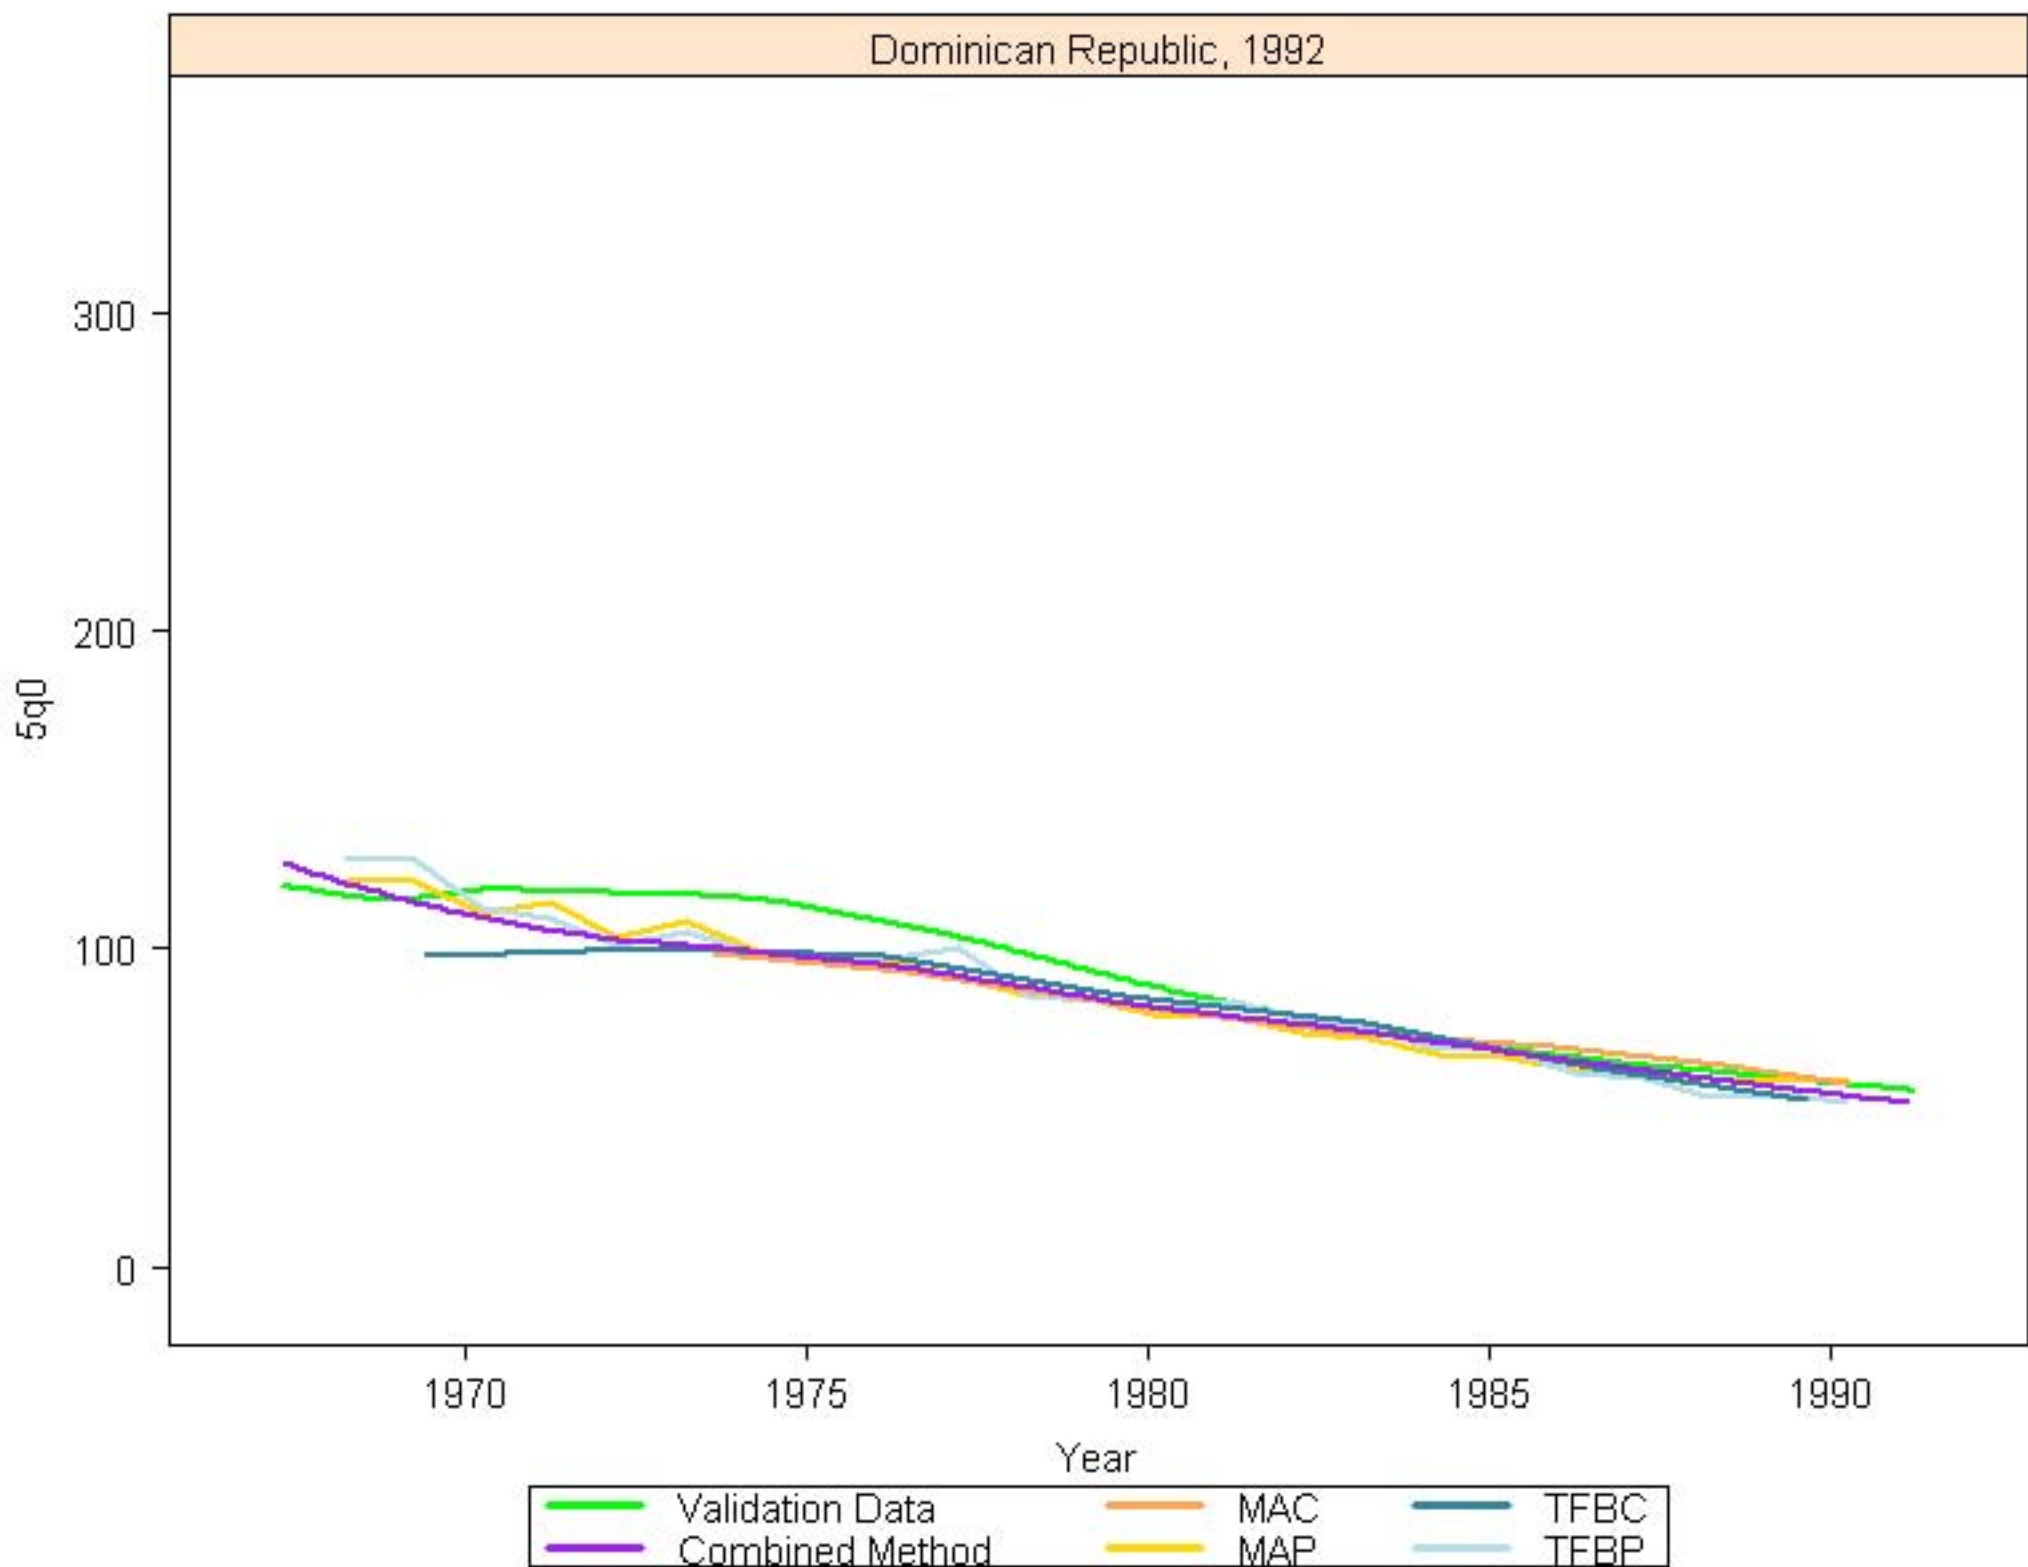

Dominican Republic, 1997

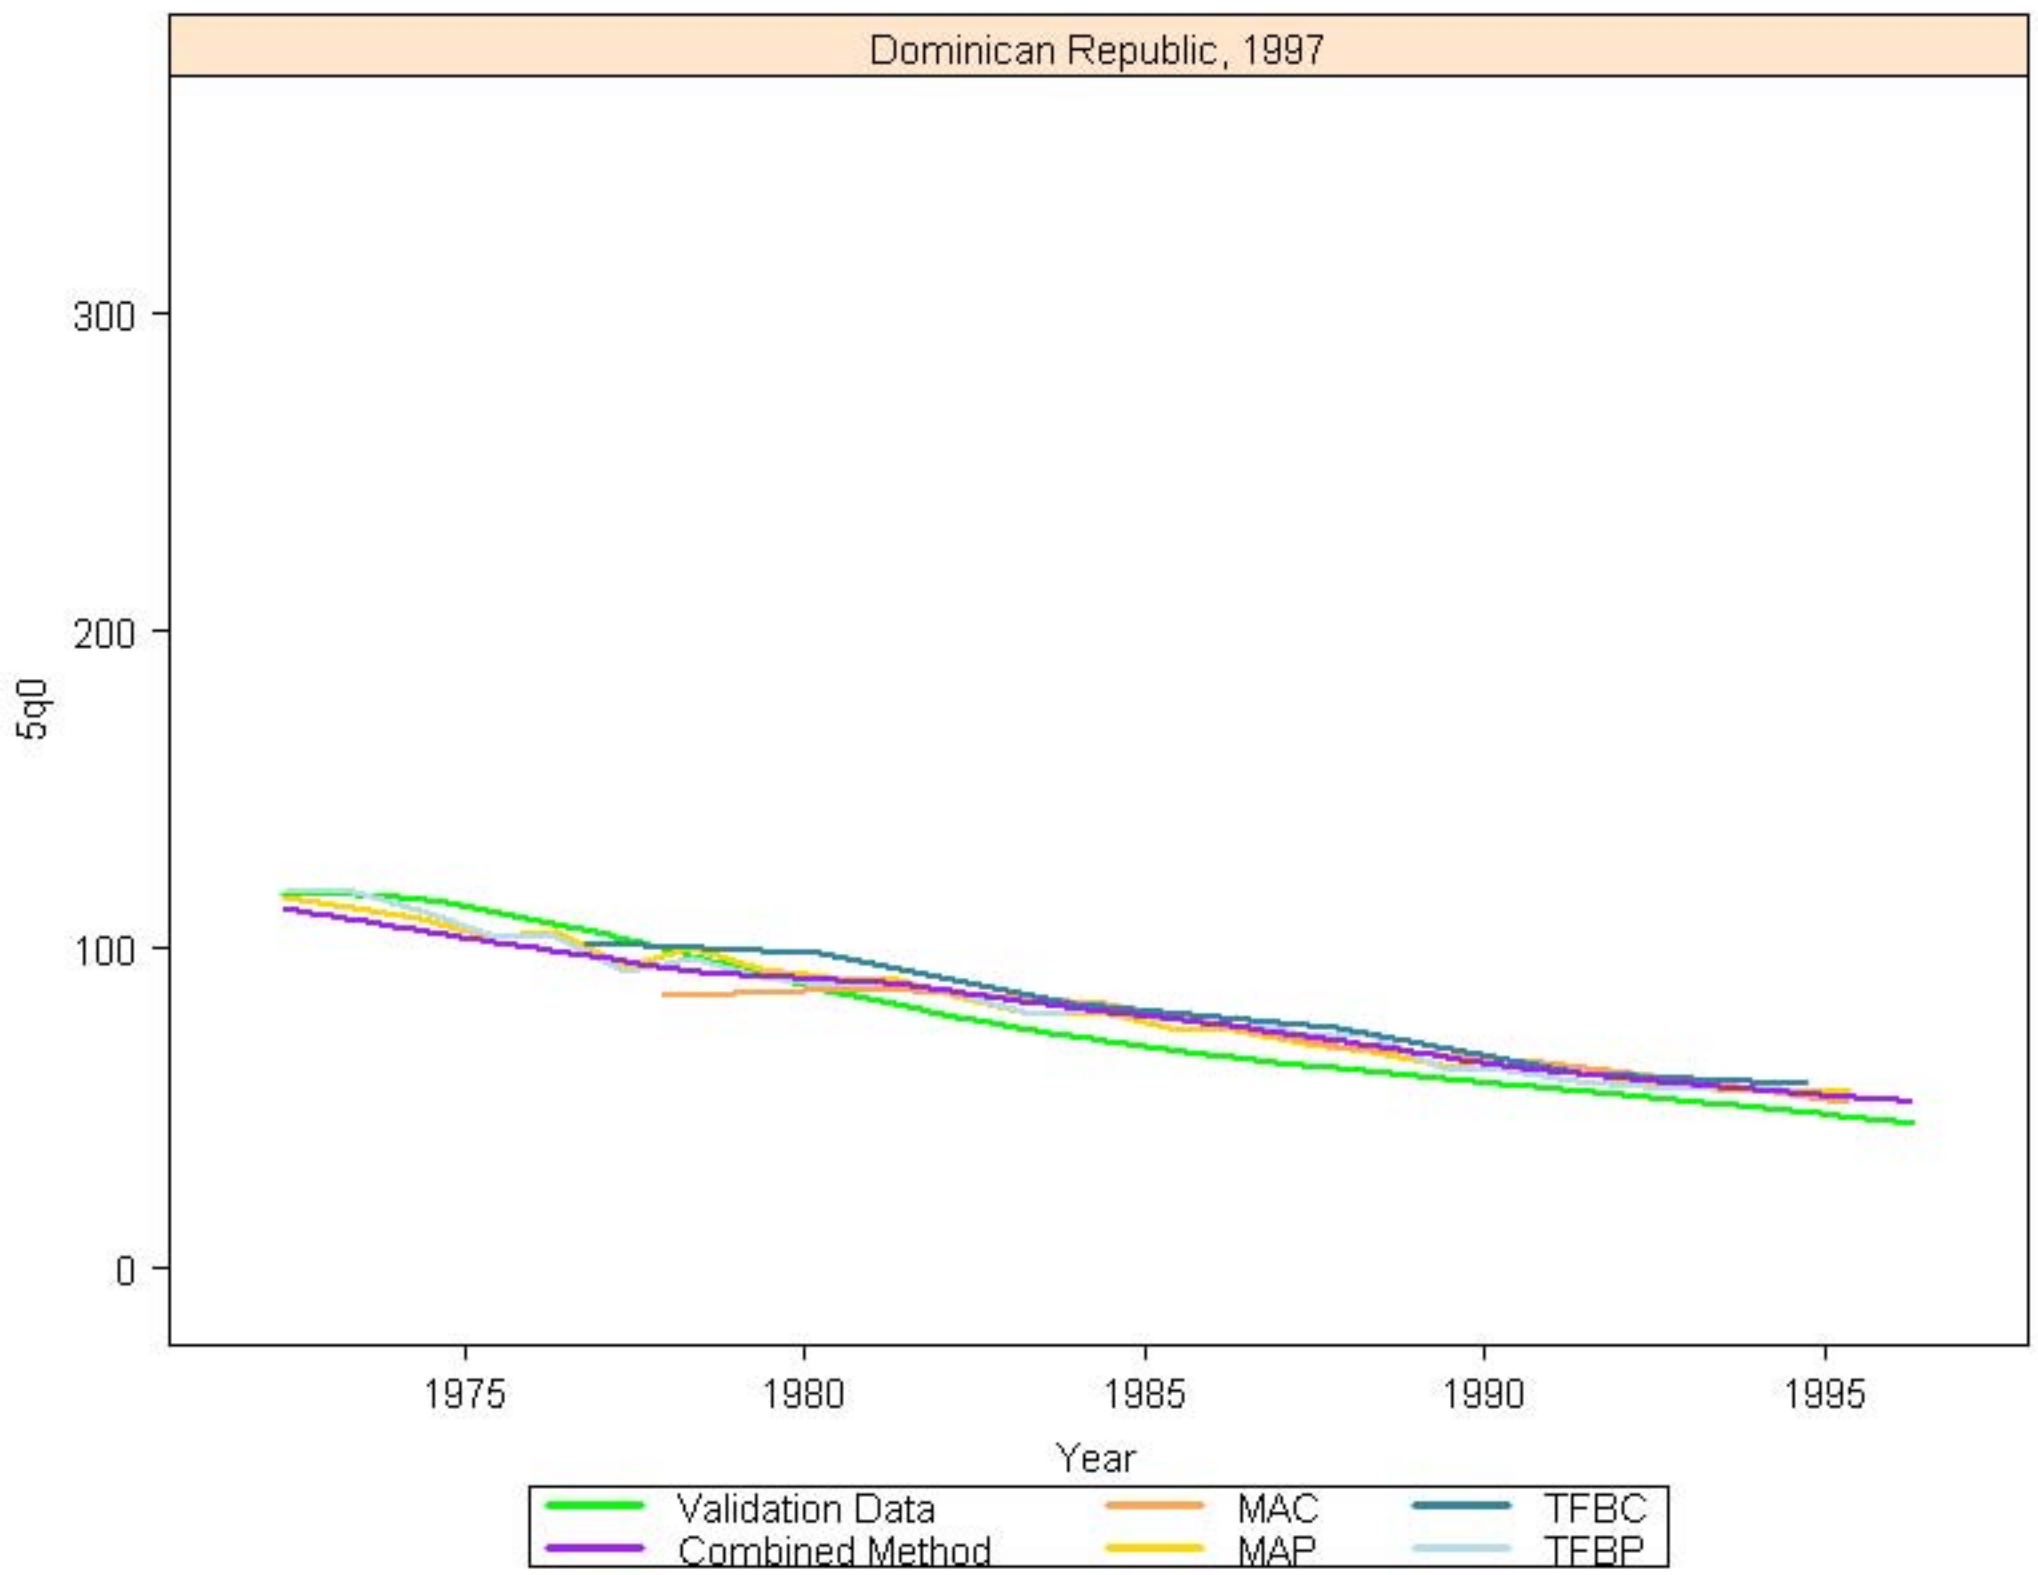

Dominican Republic, 2003

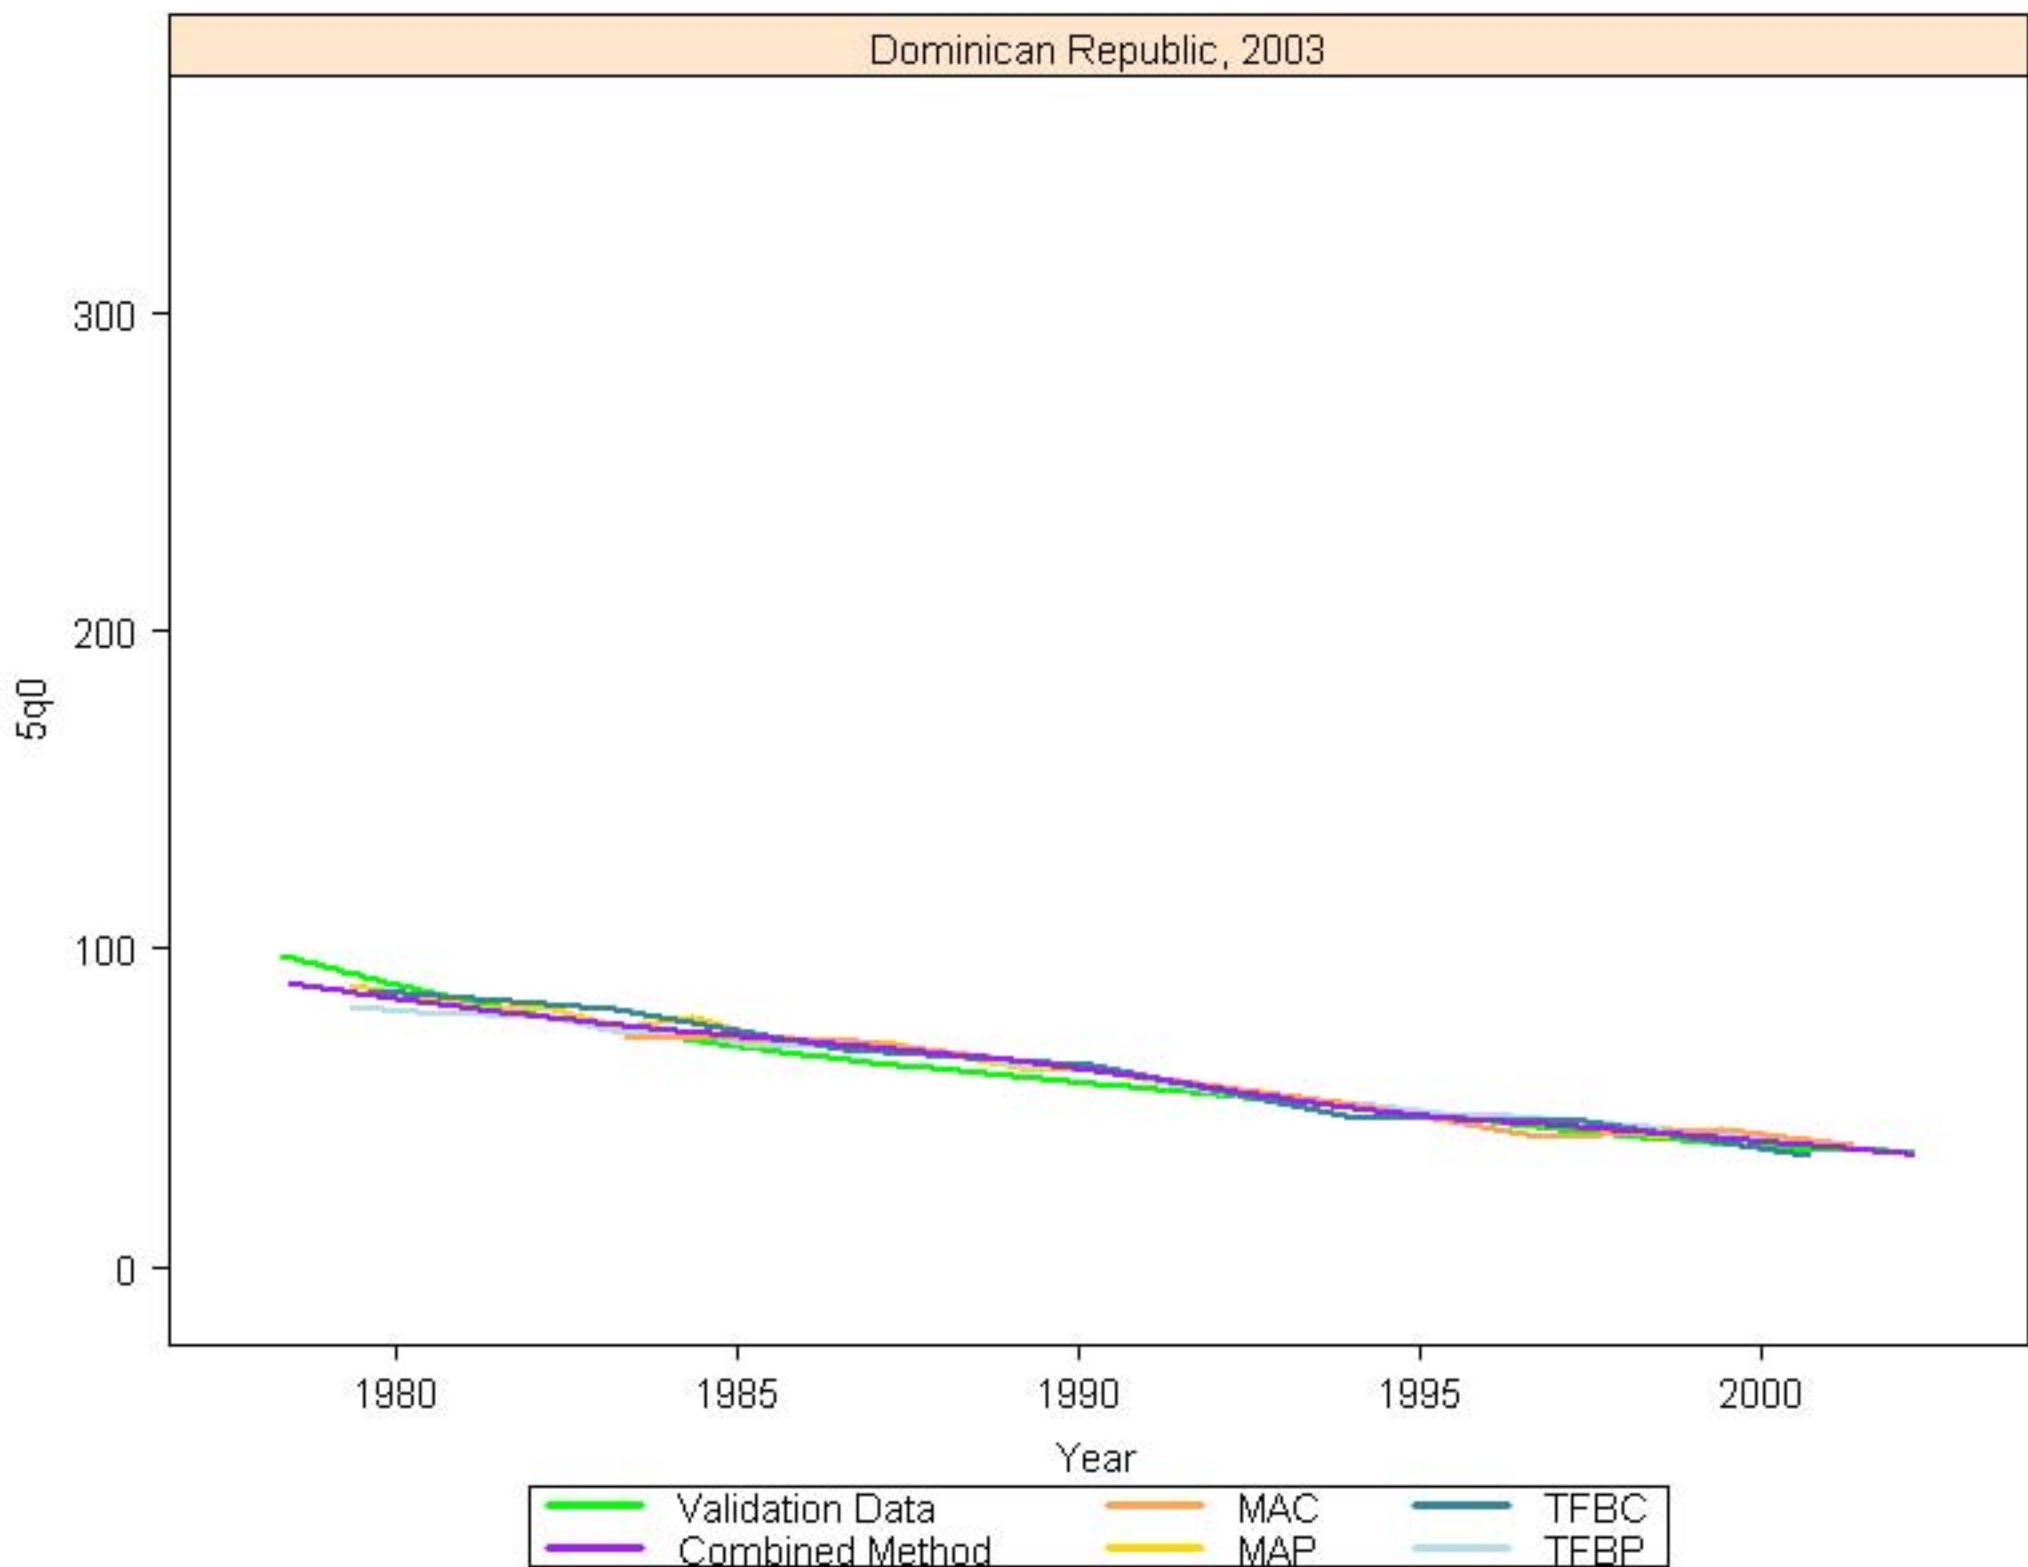

Dominican Republic, 2007

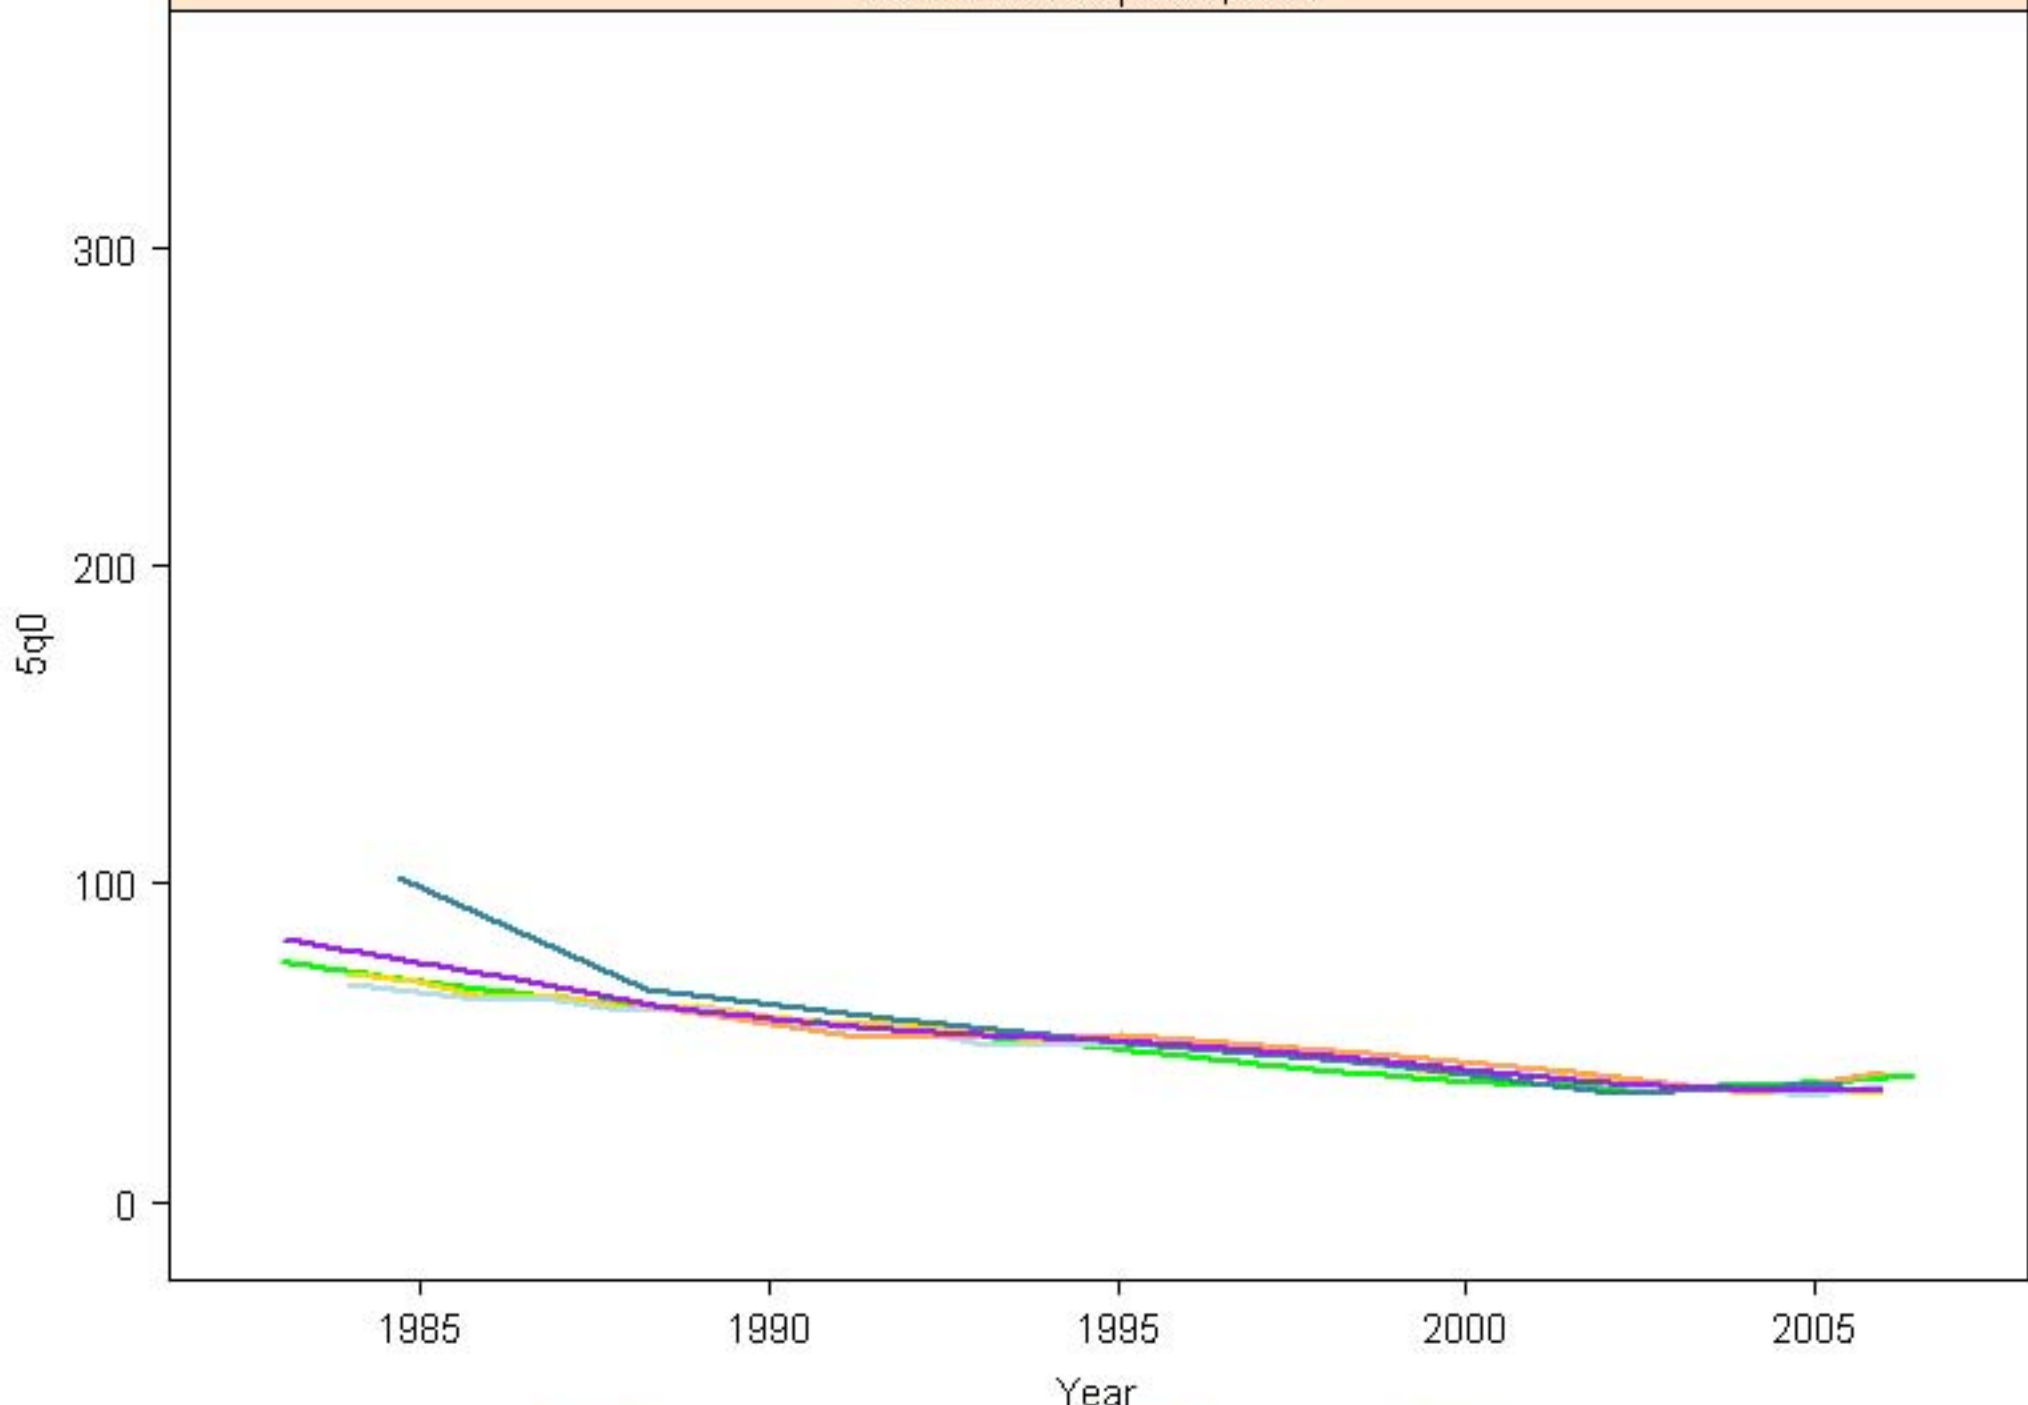

Ecuador, 1987

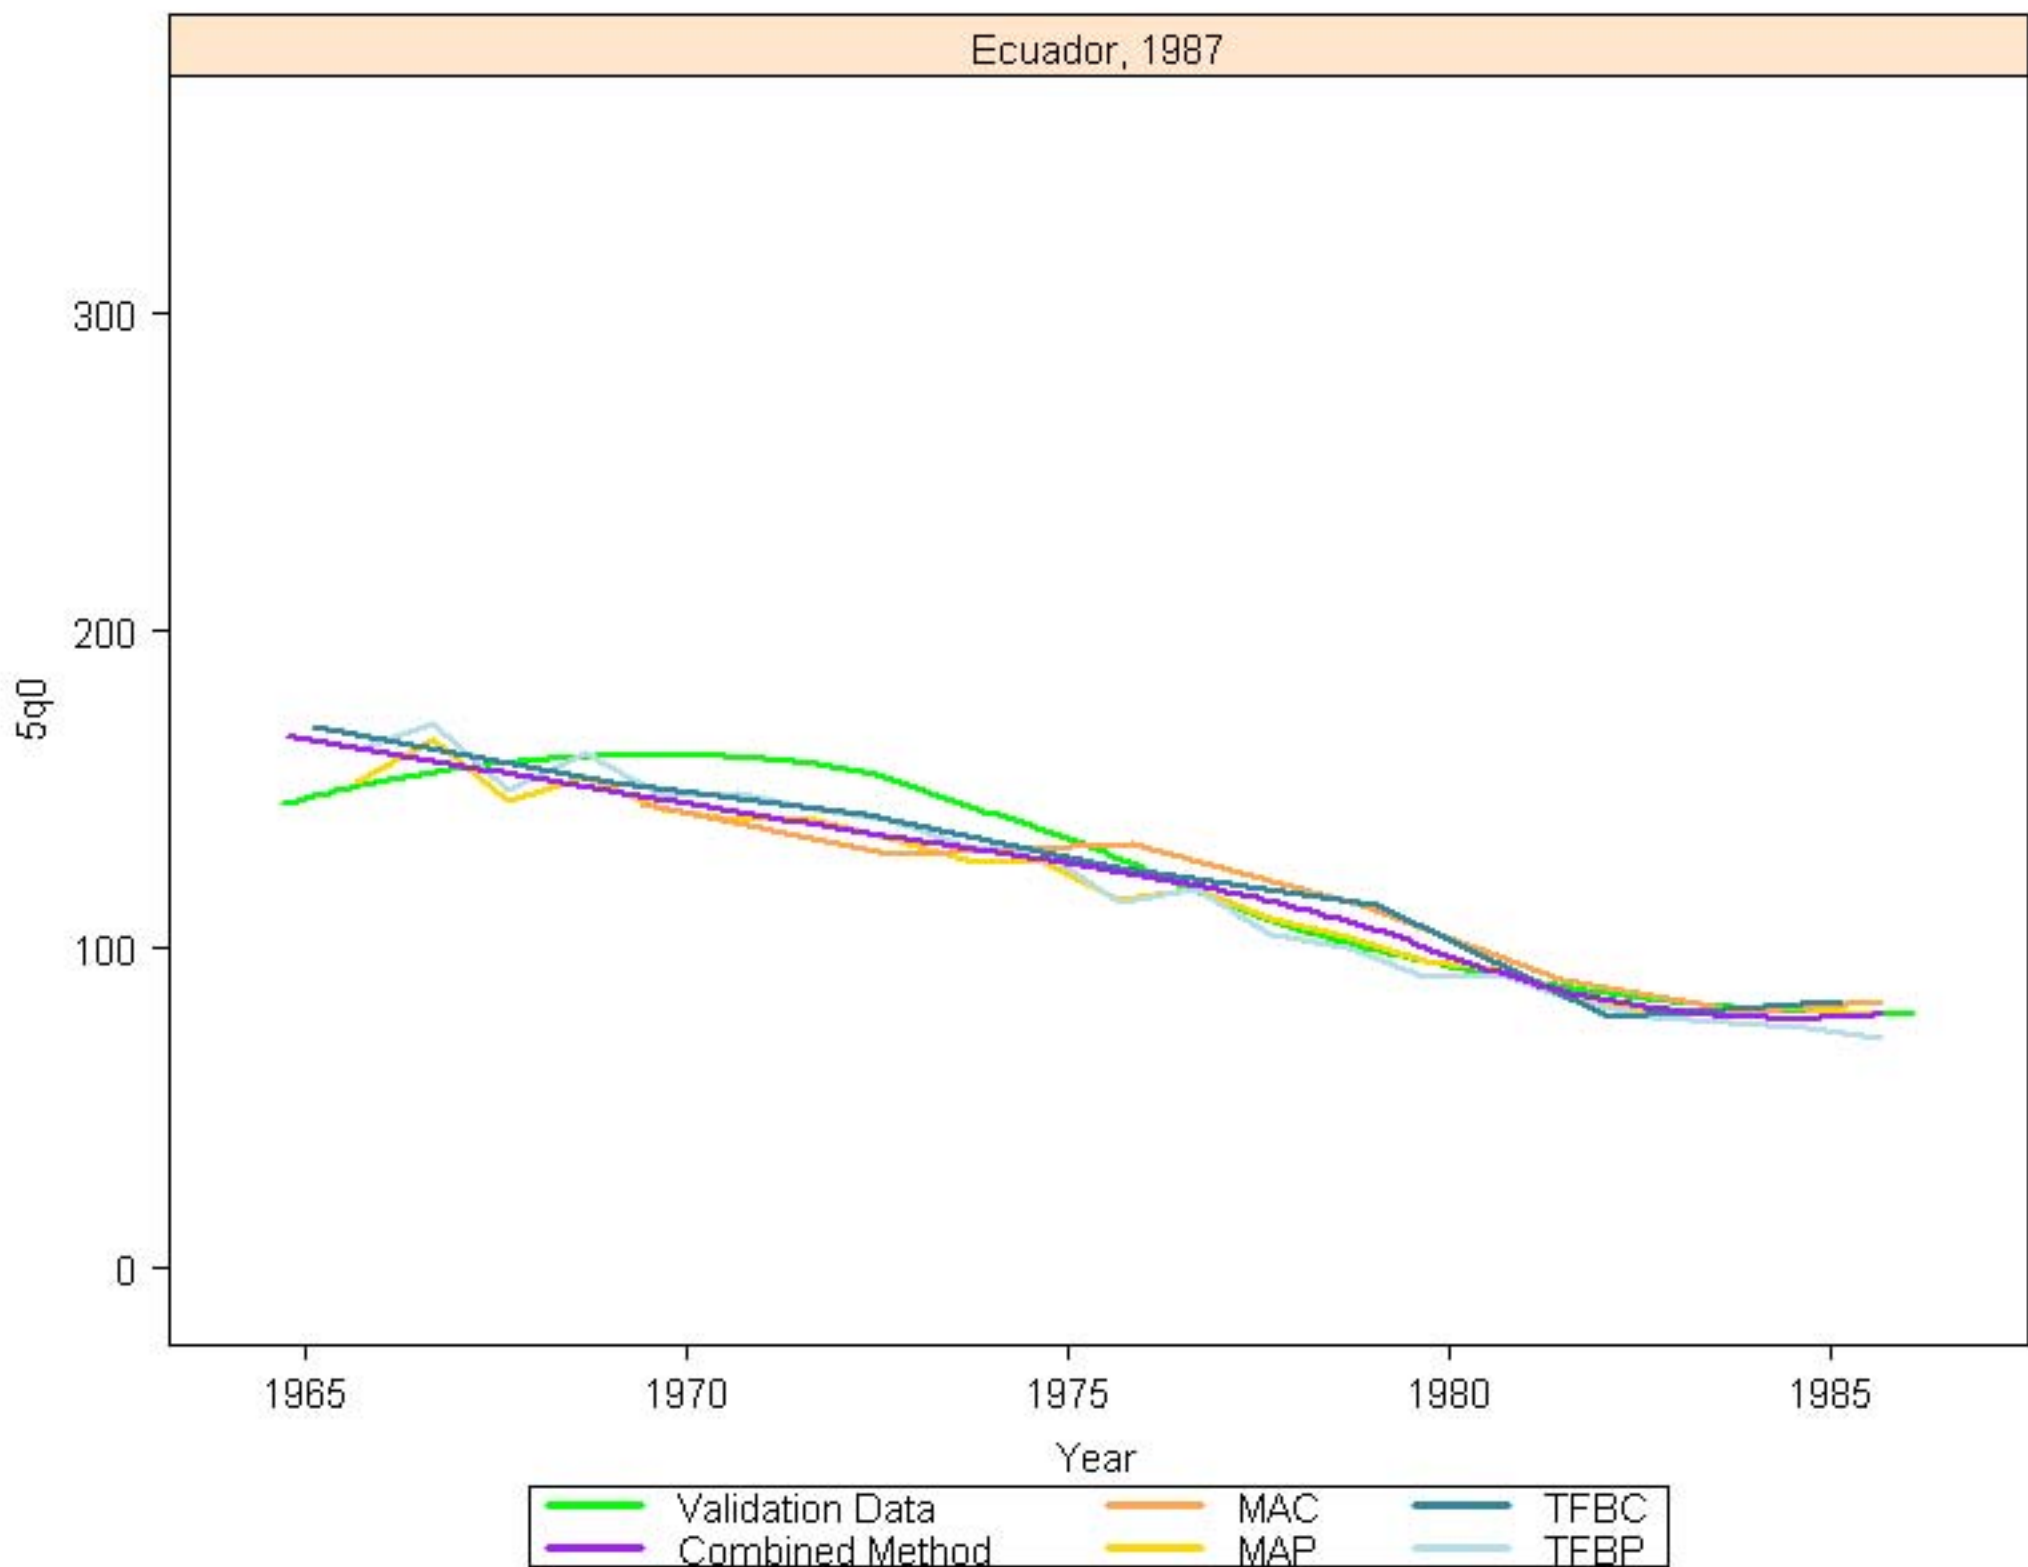

Egypt, 1989

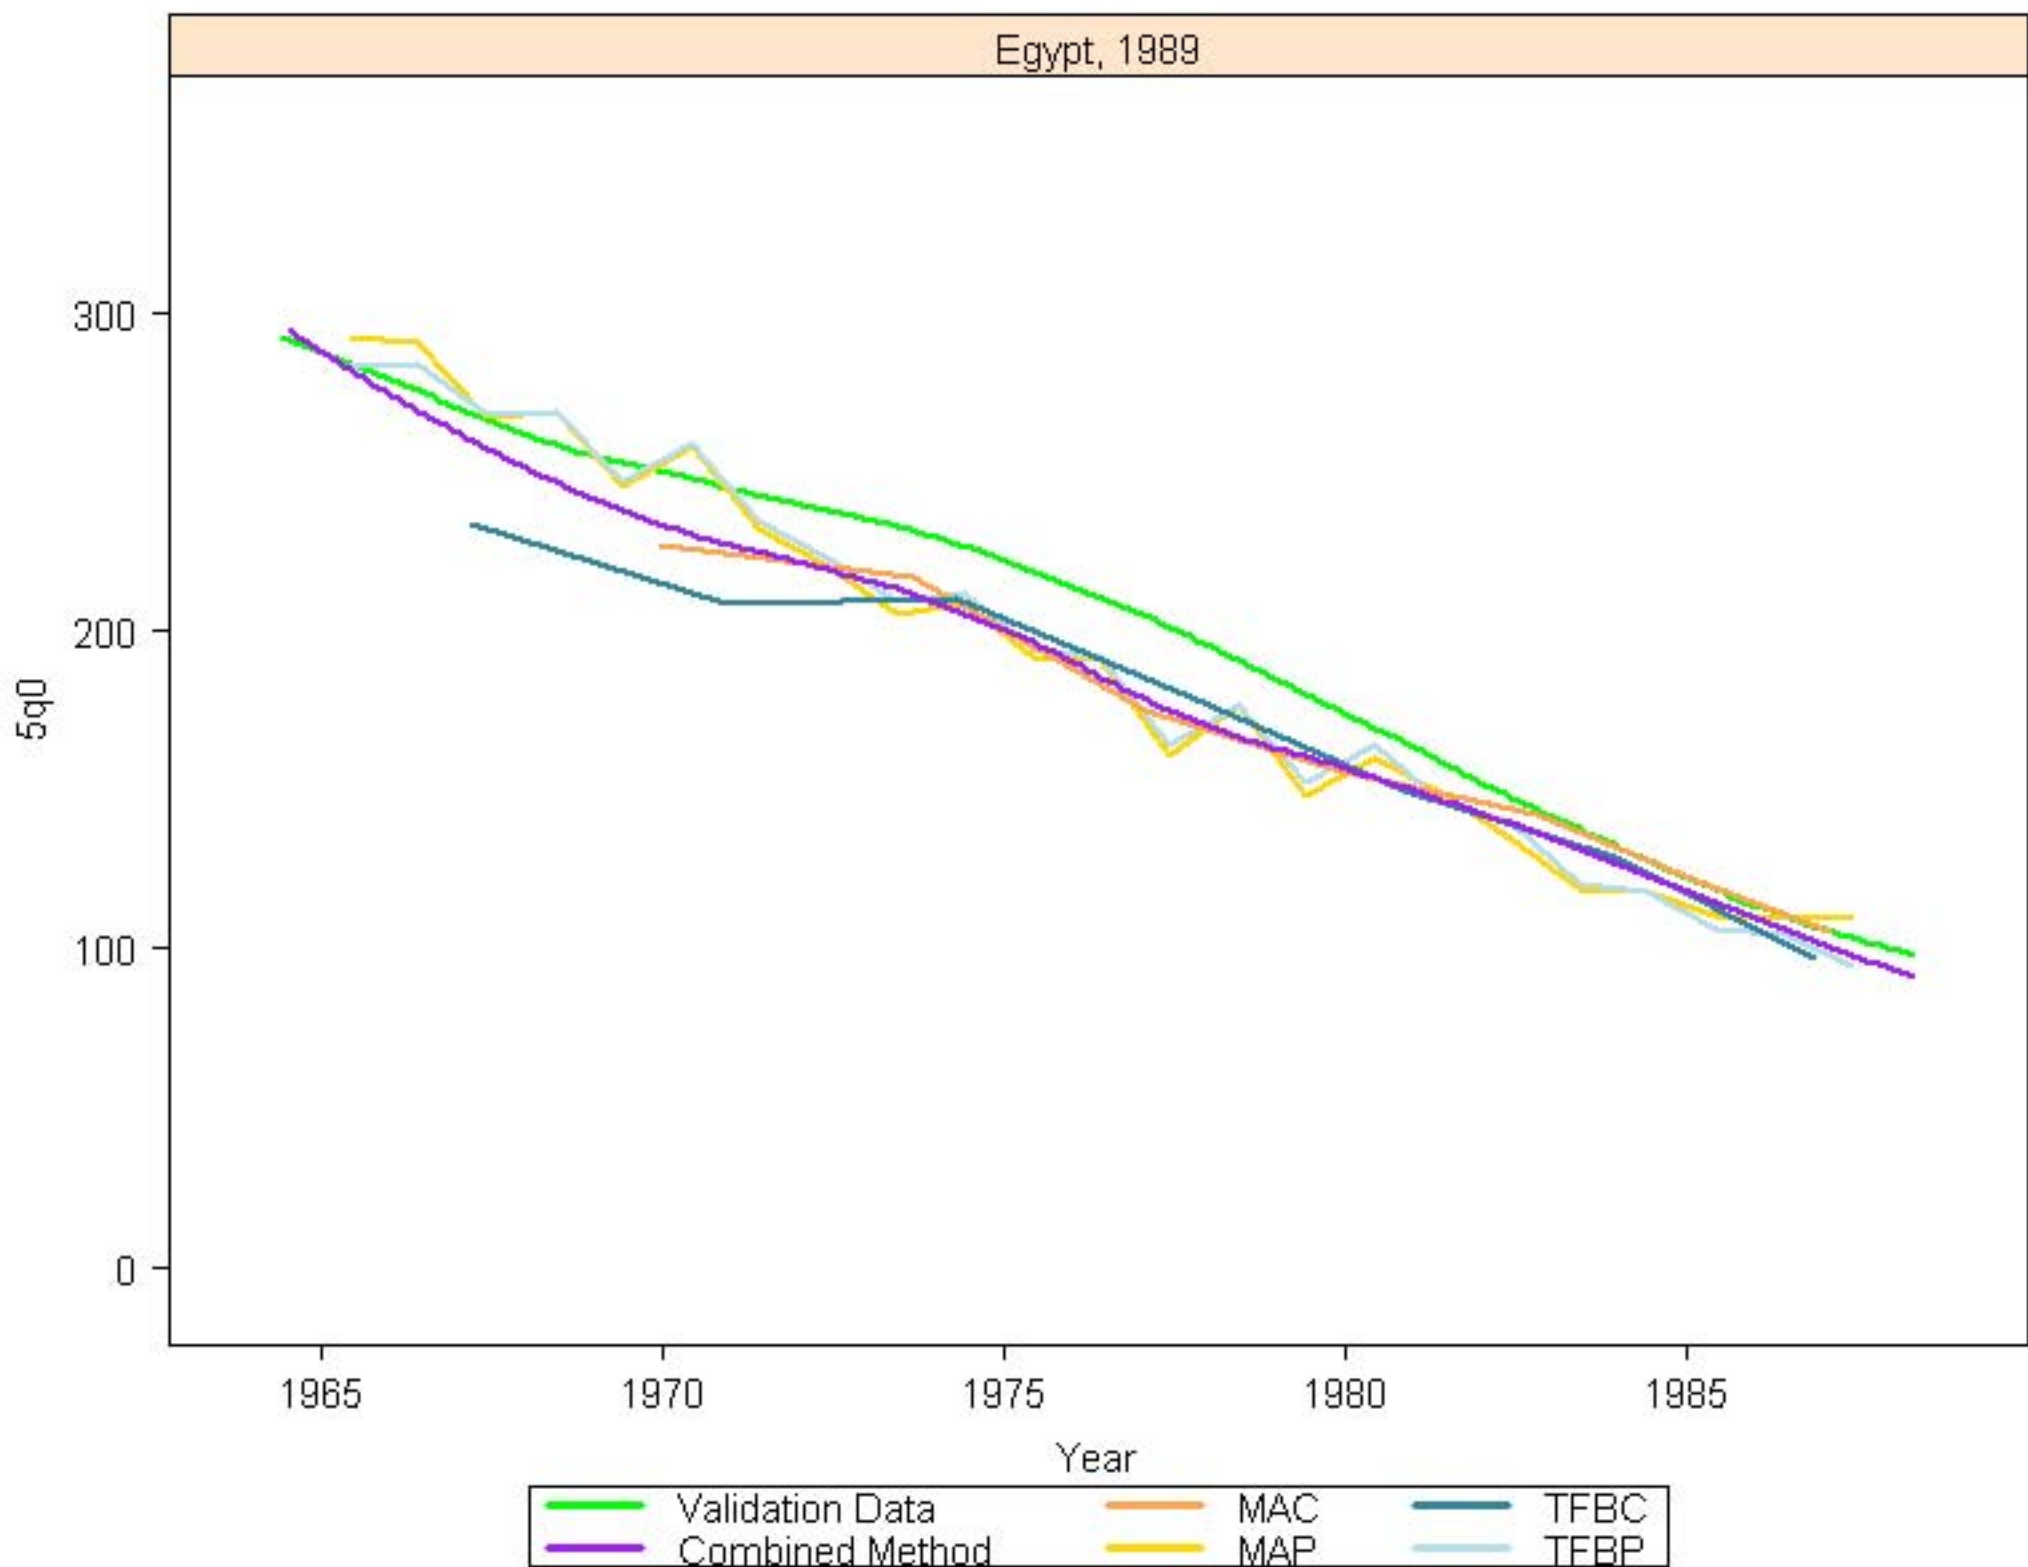

Egypt, 1993

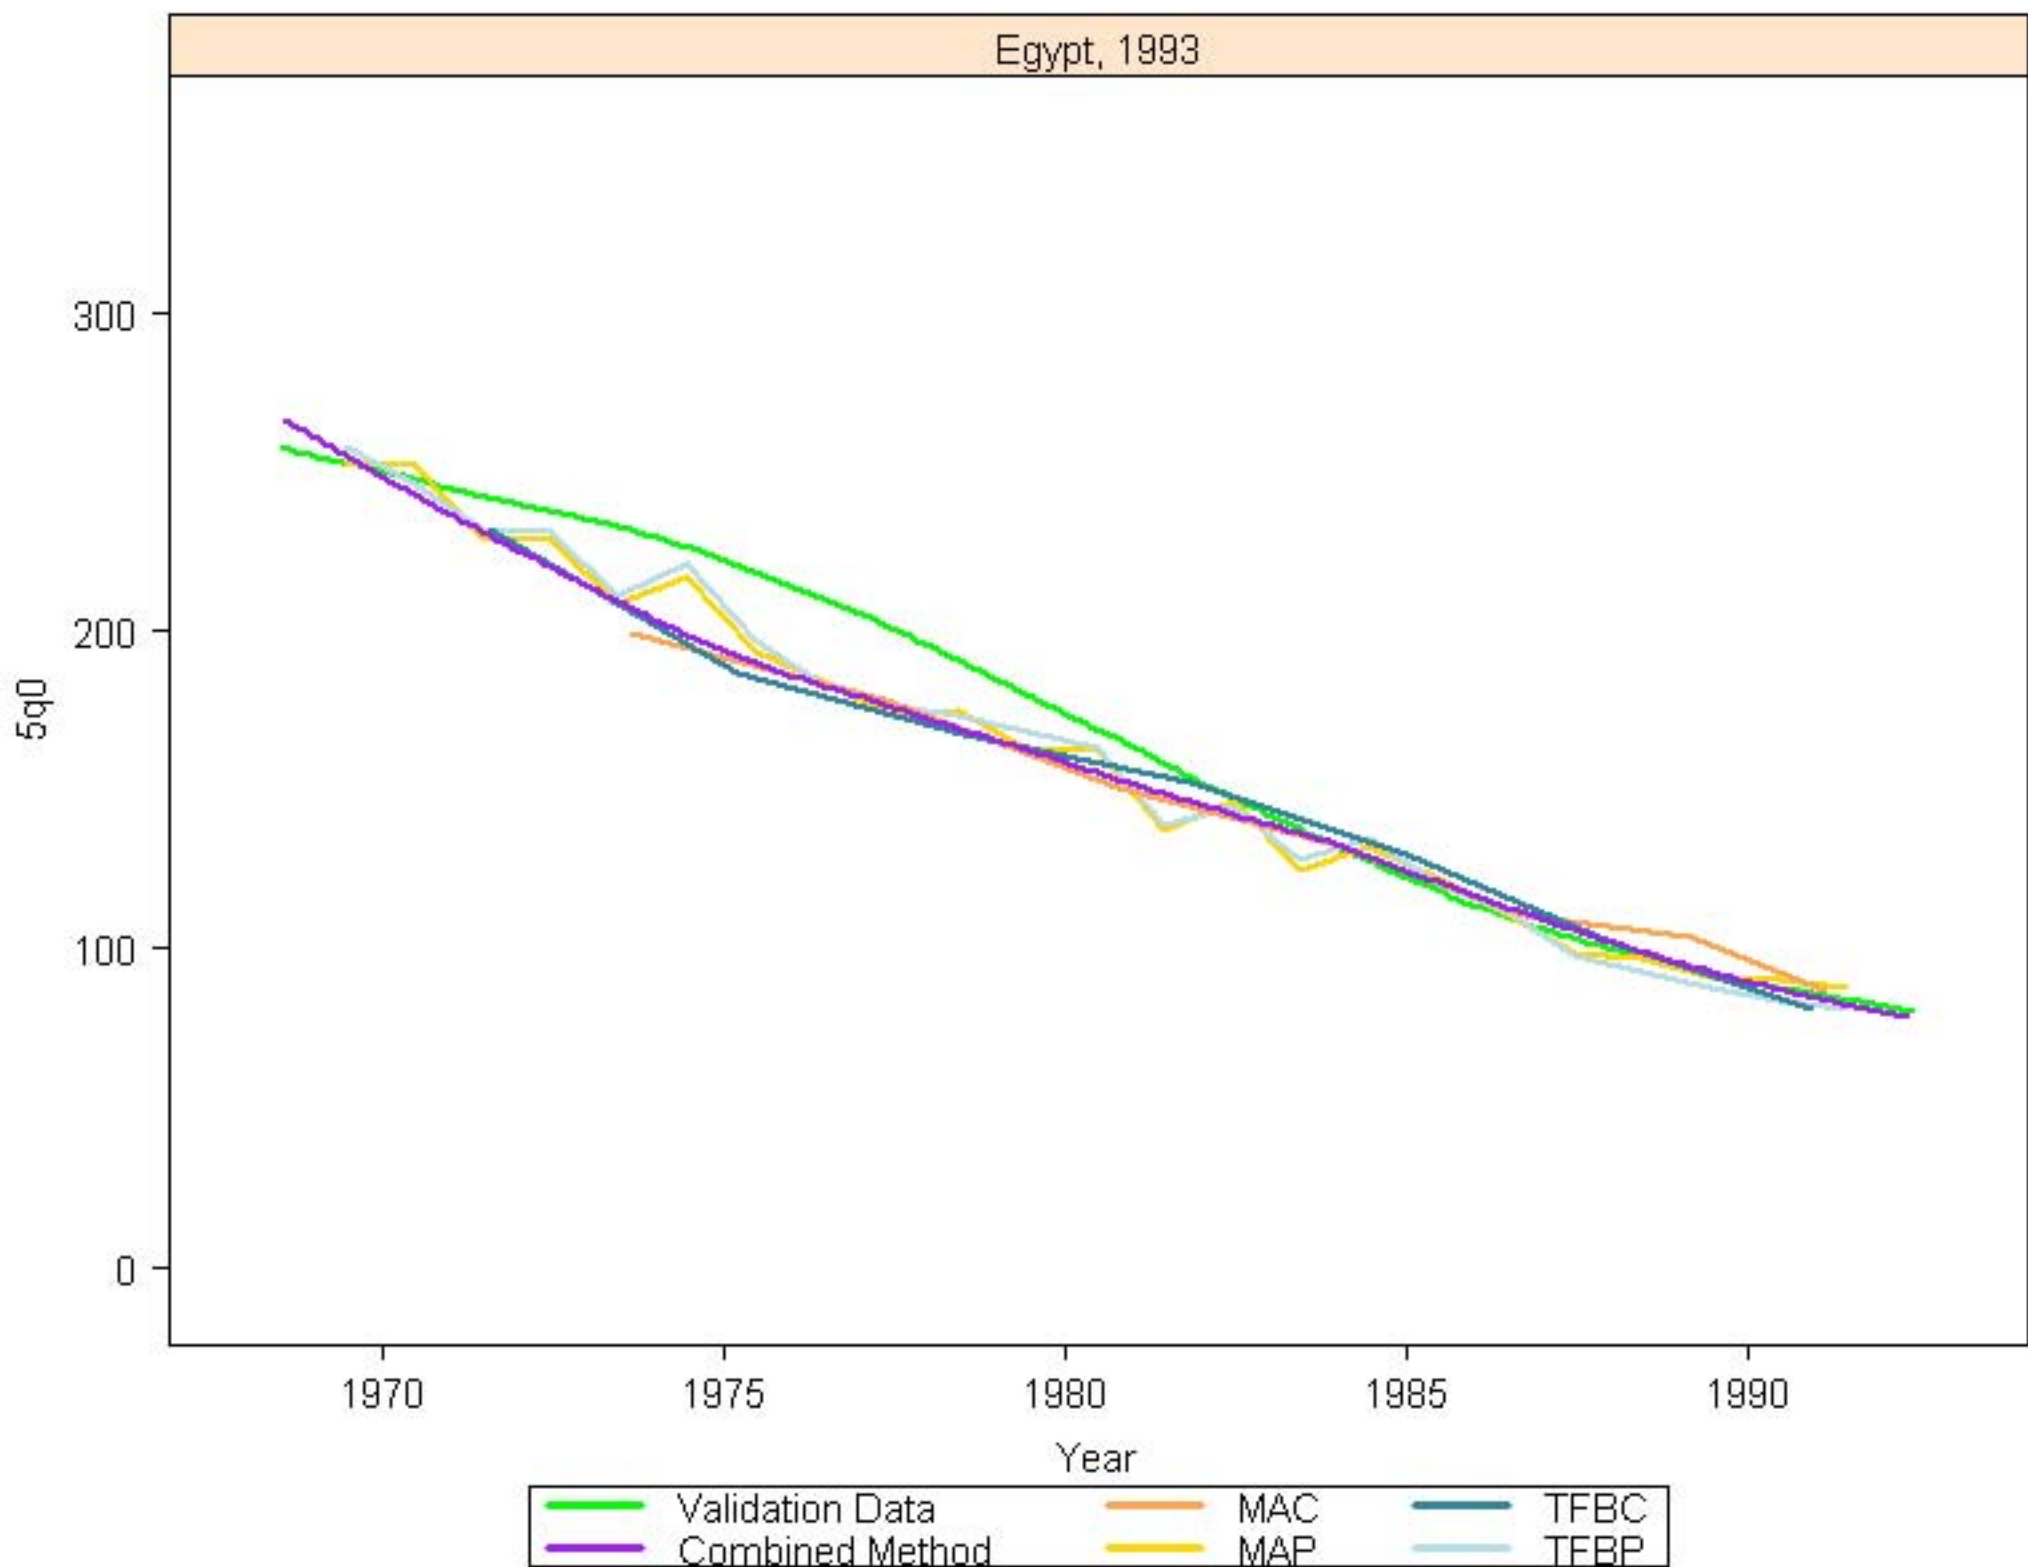

Egypt, 1996

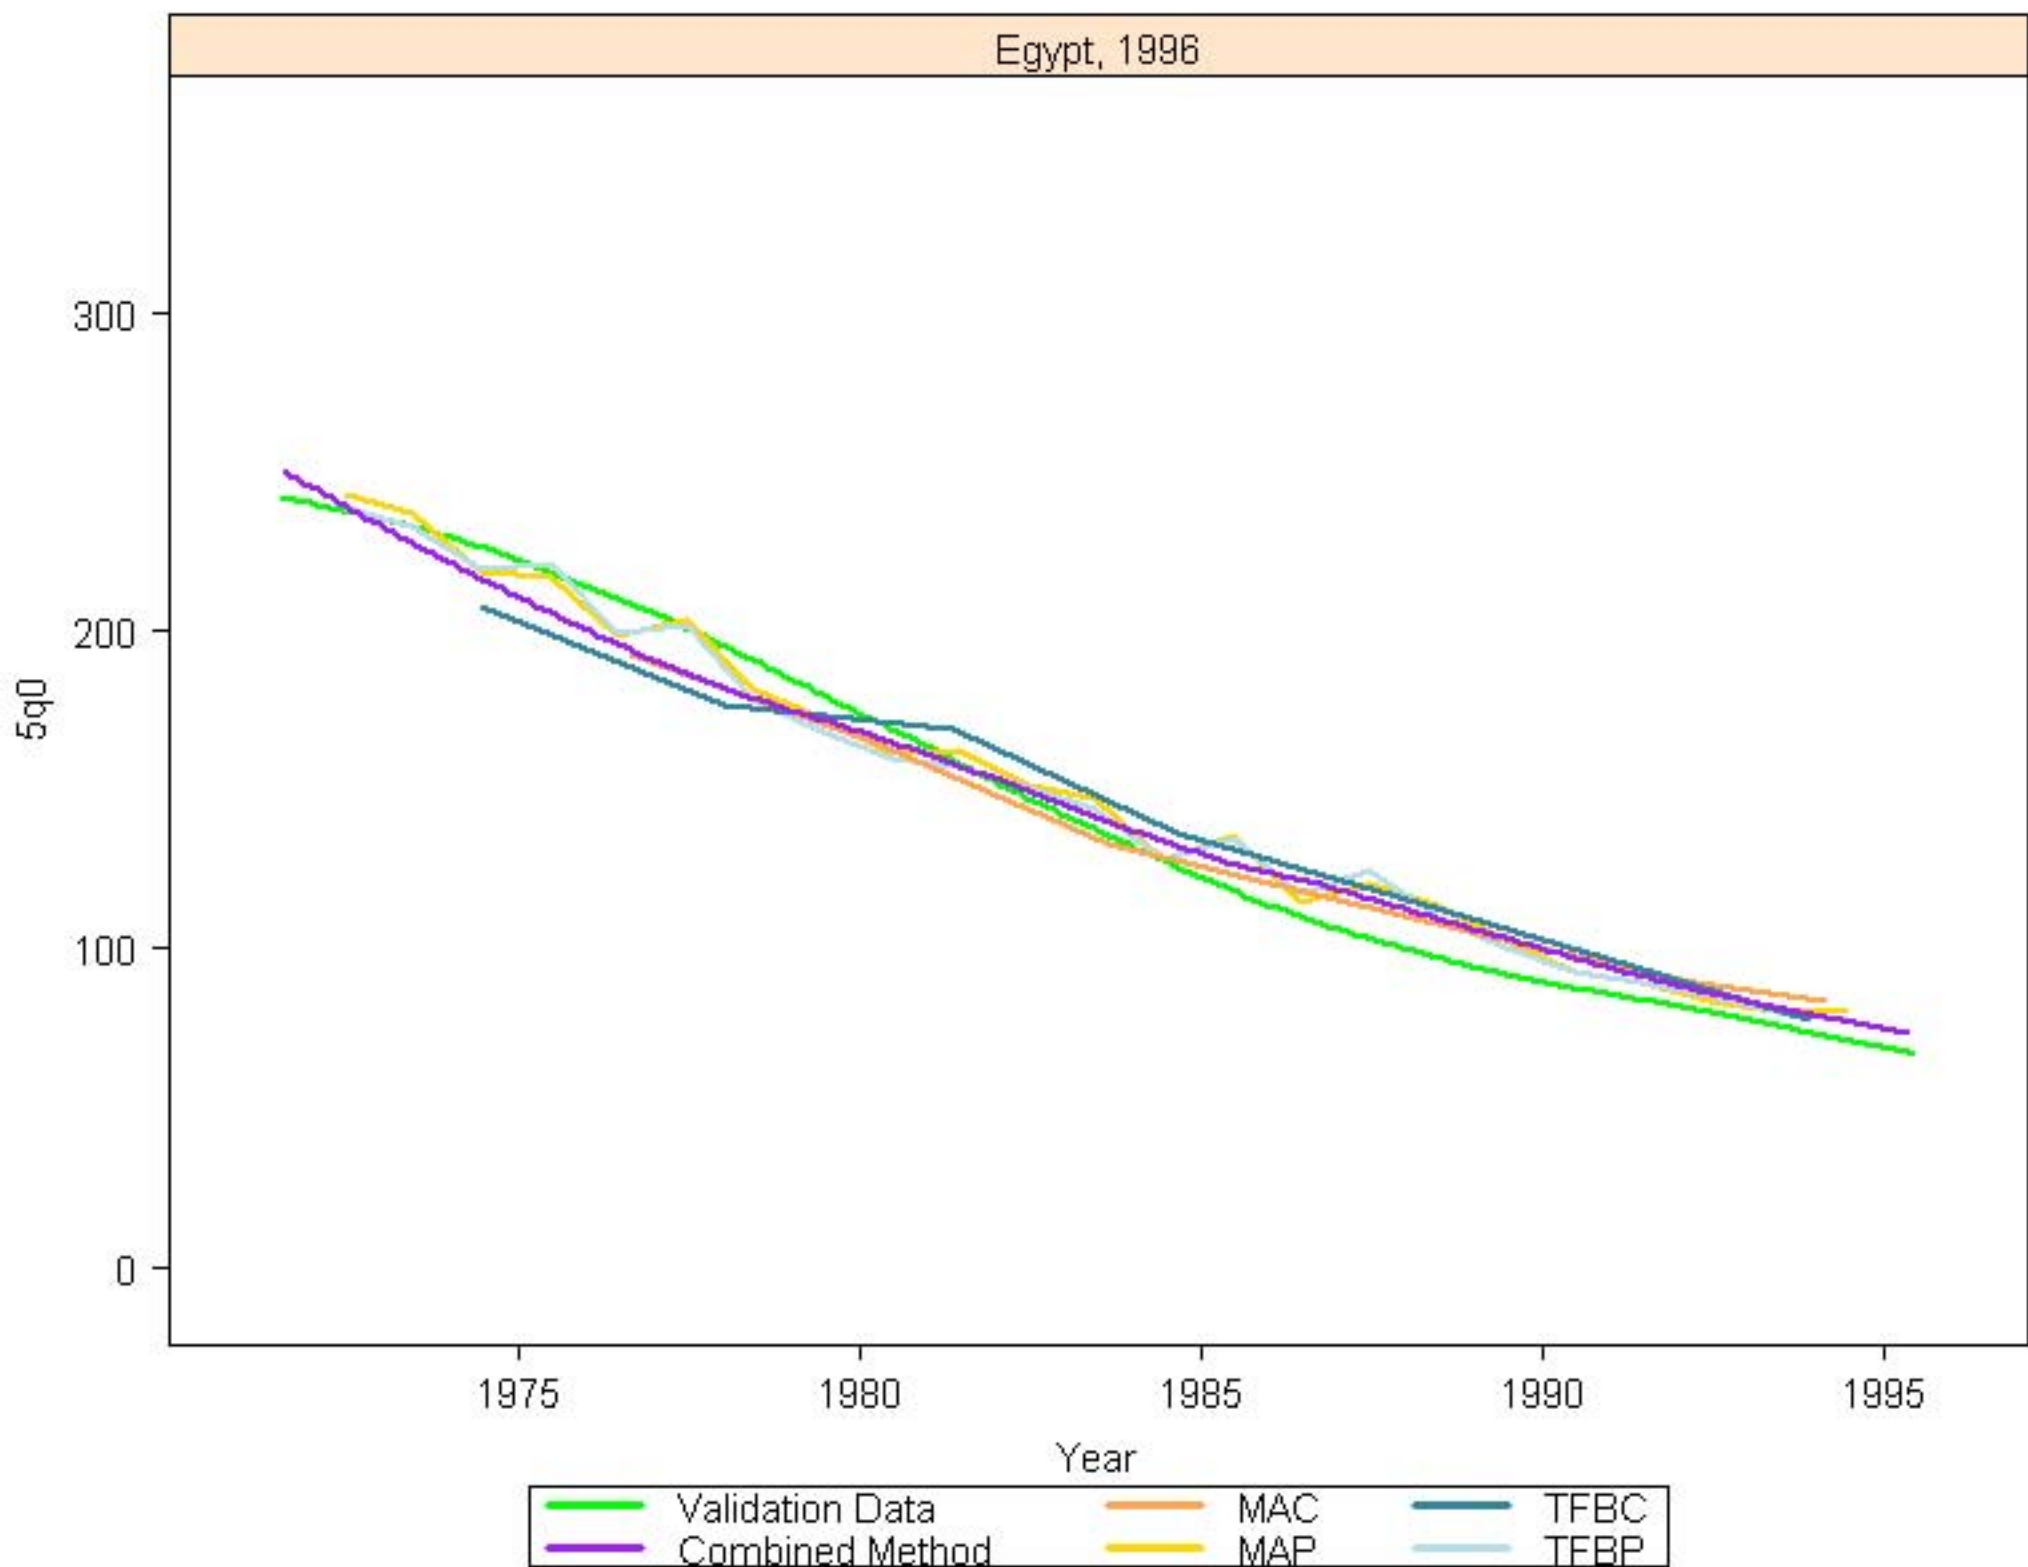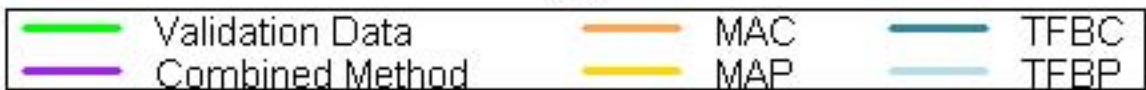



Egypt, 2000

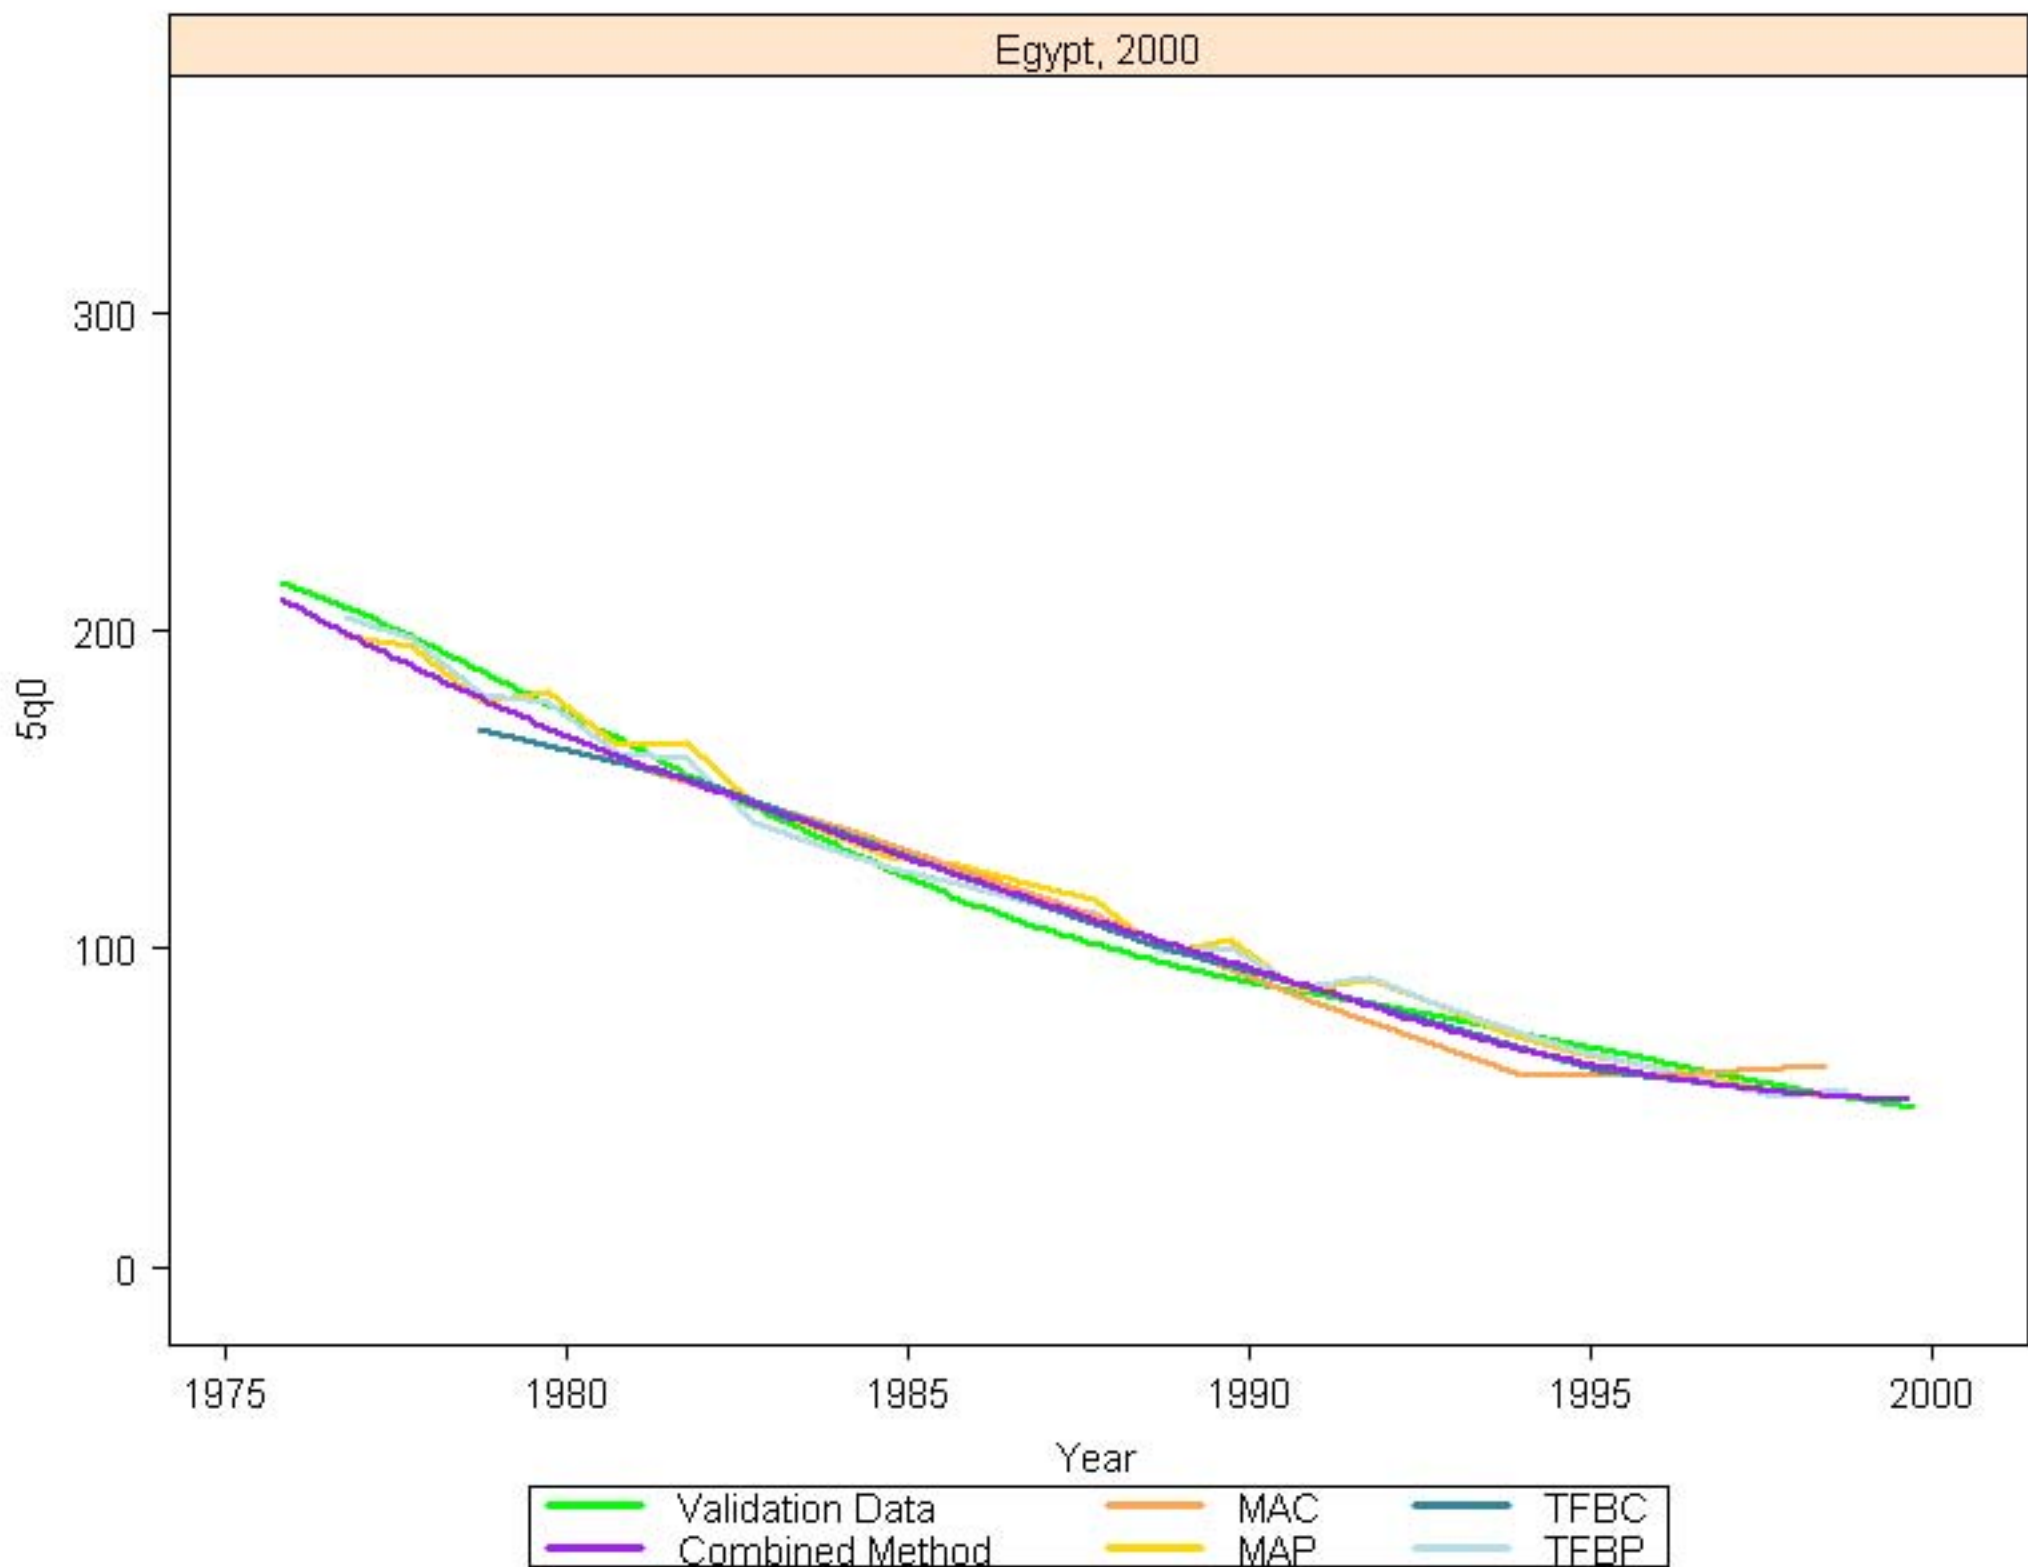

Egypt, 2003

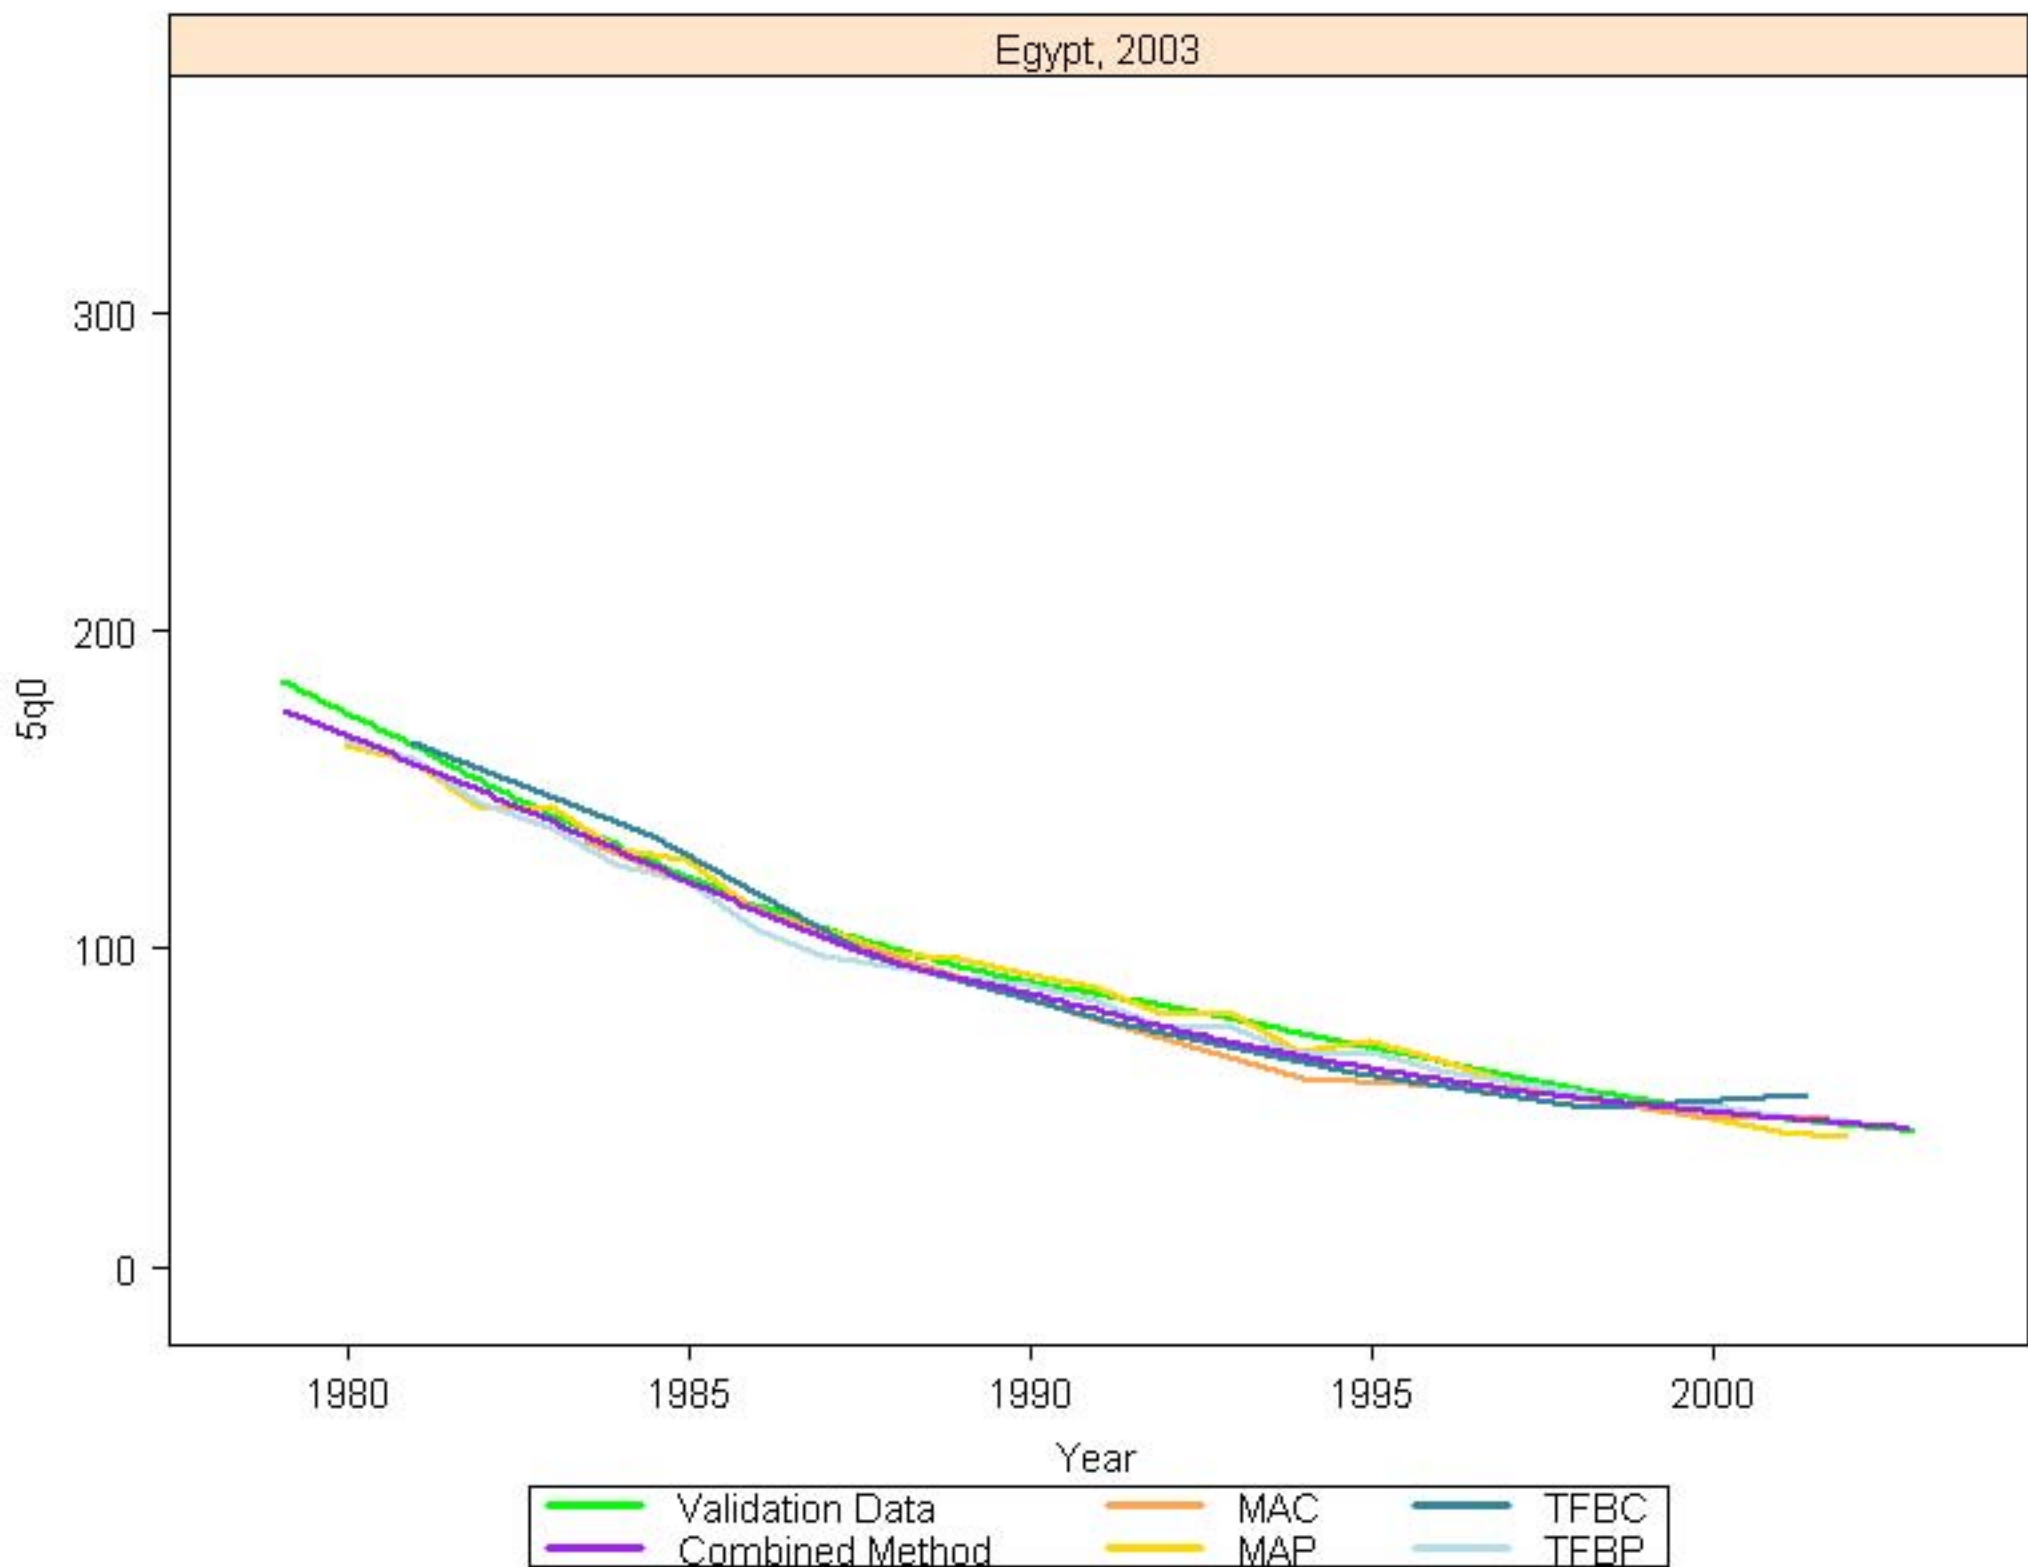

Egypt, 2005

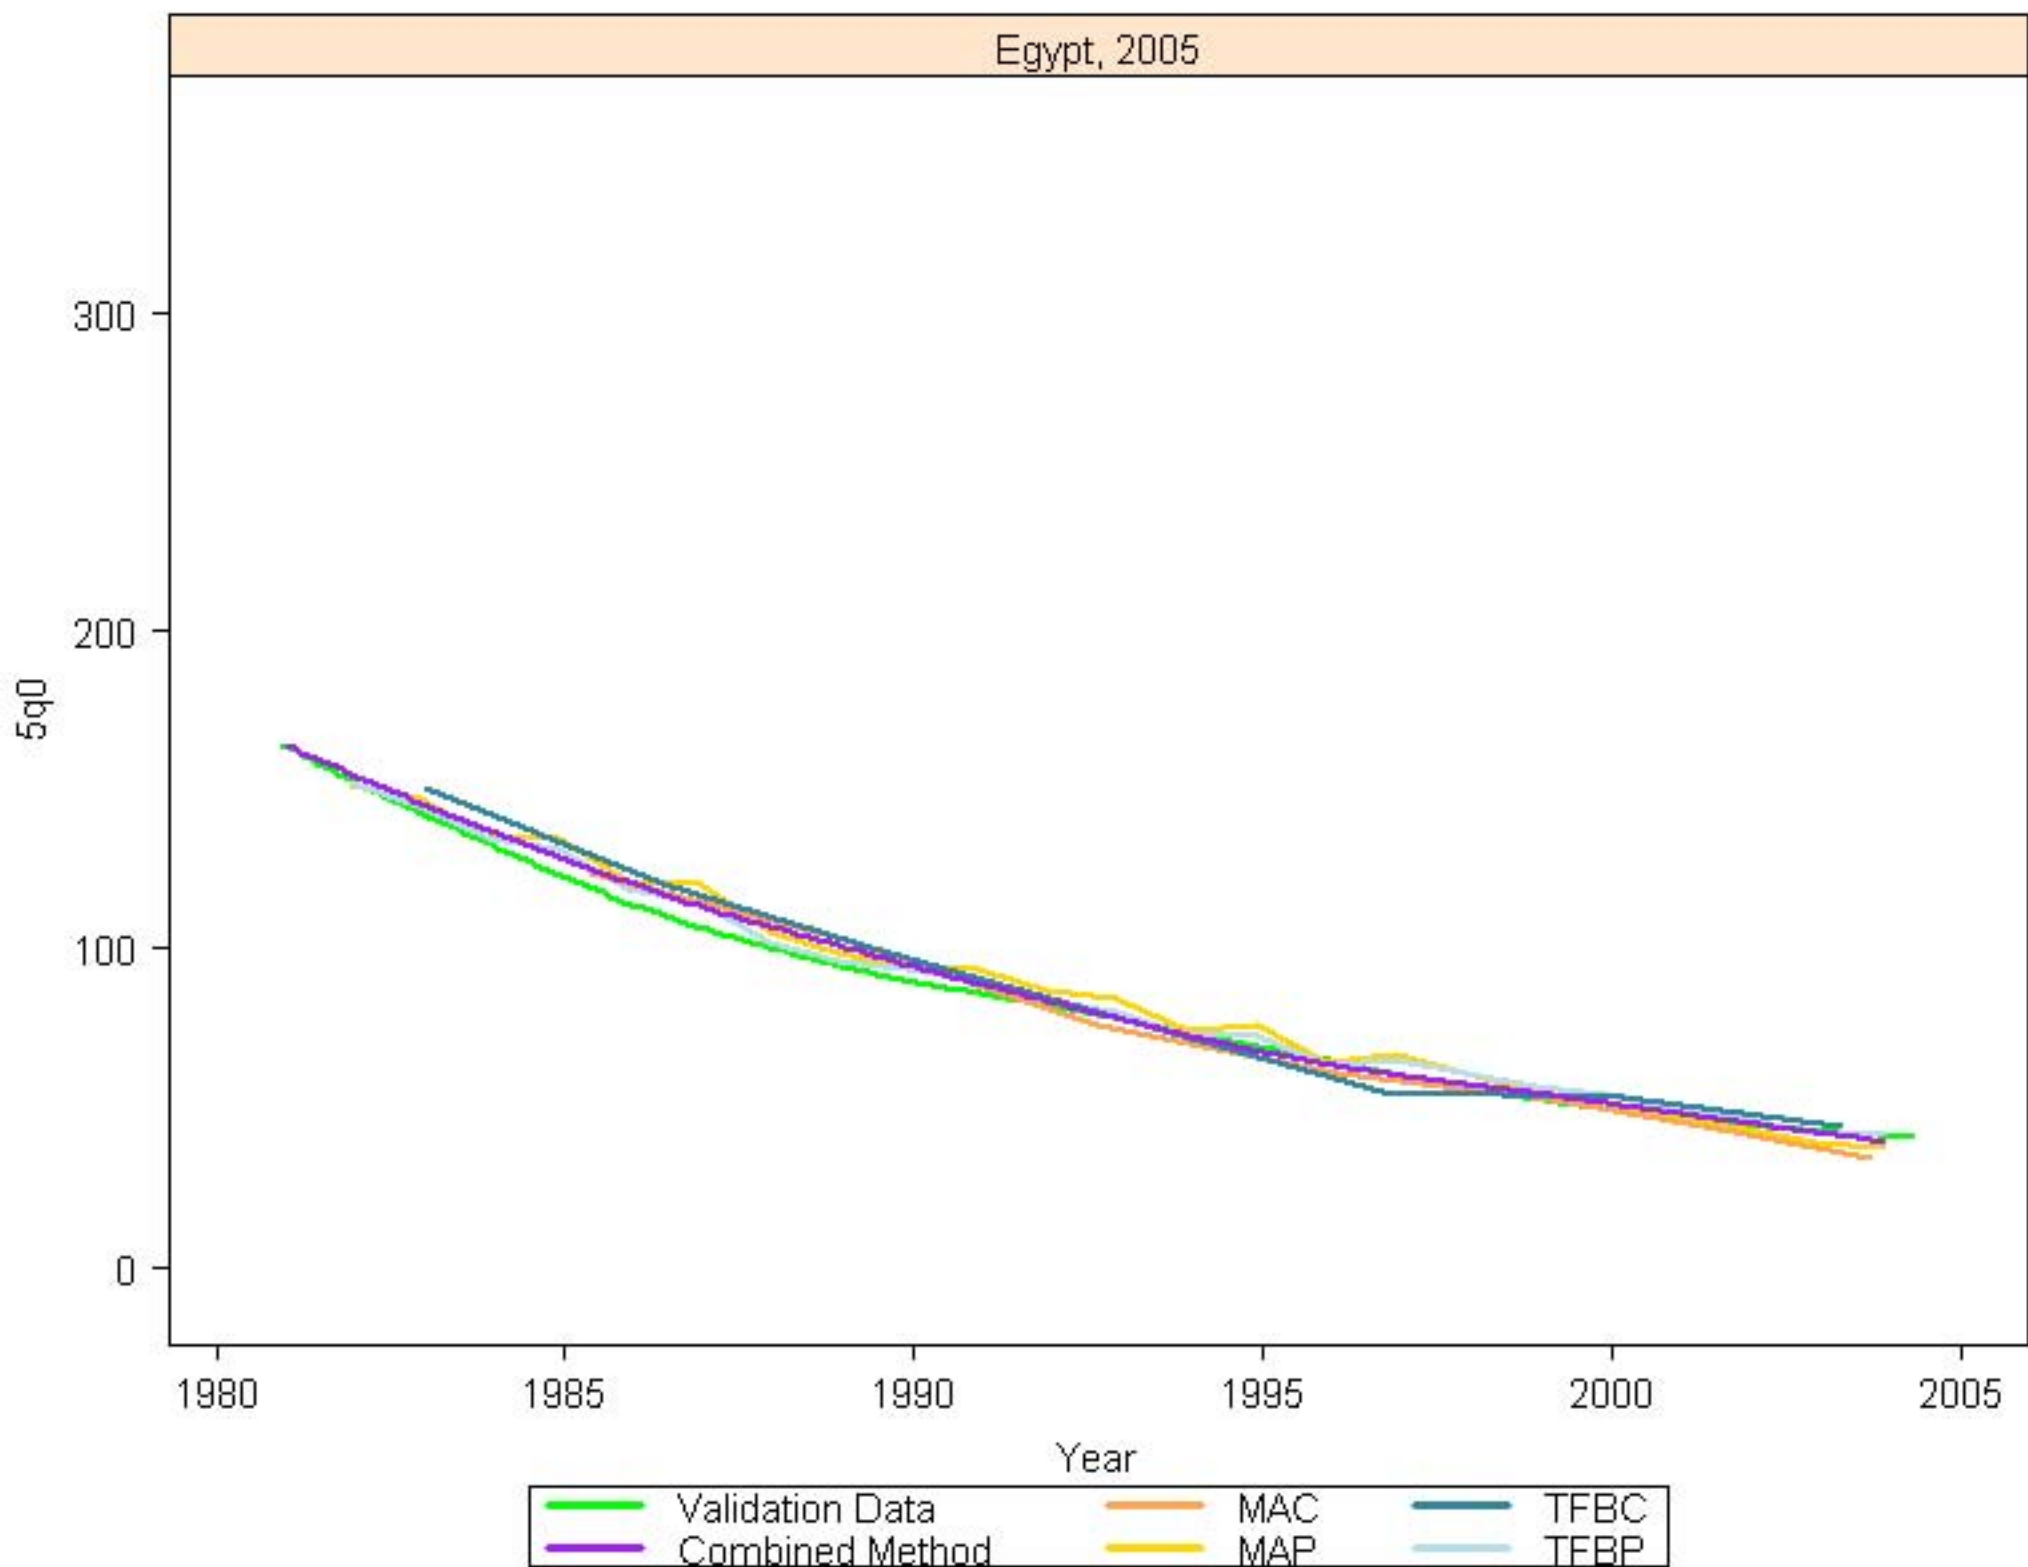

Eritrea, 1996

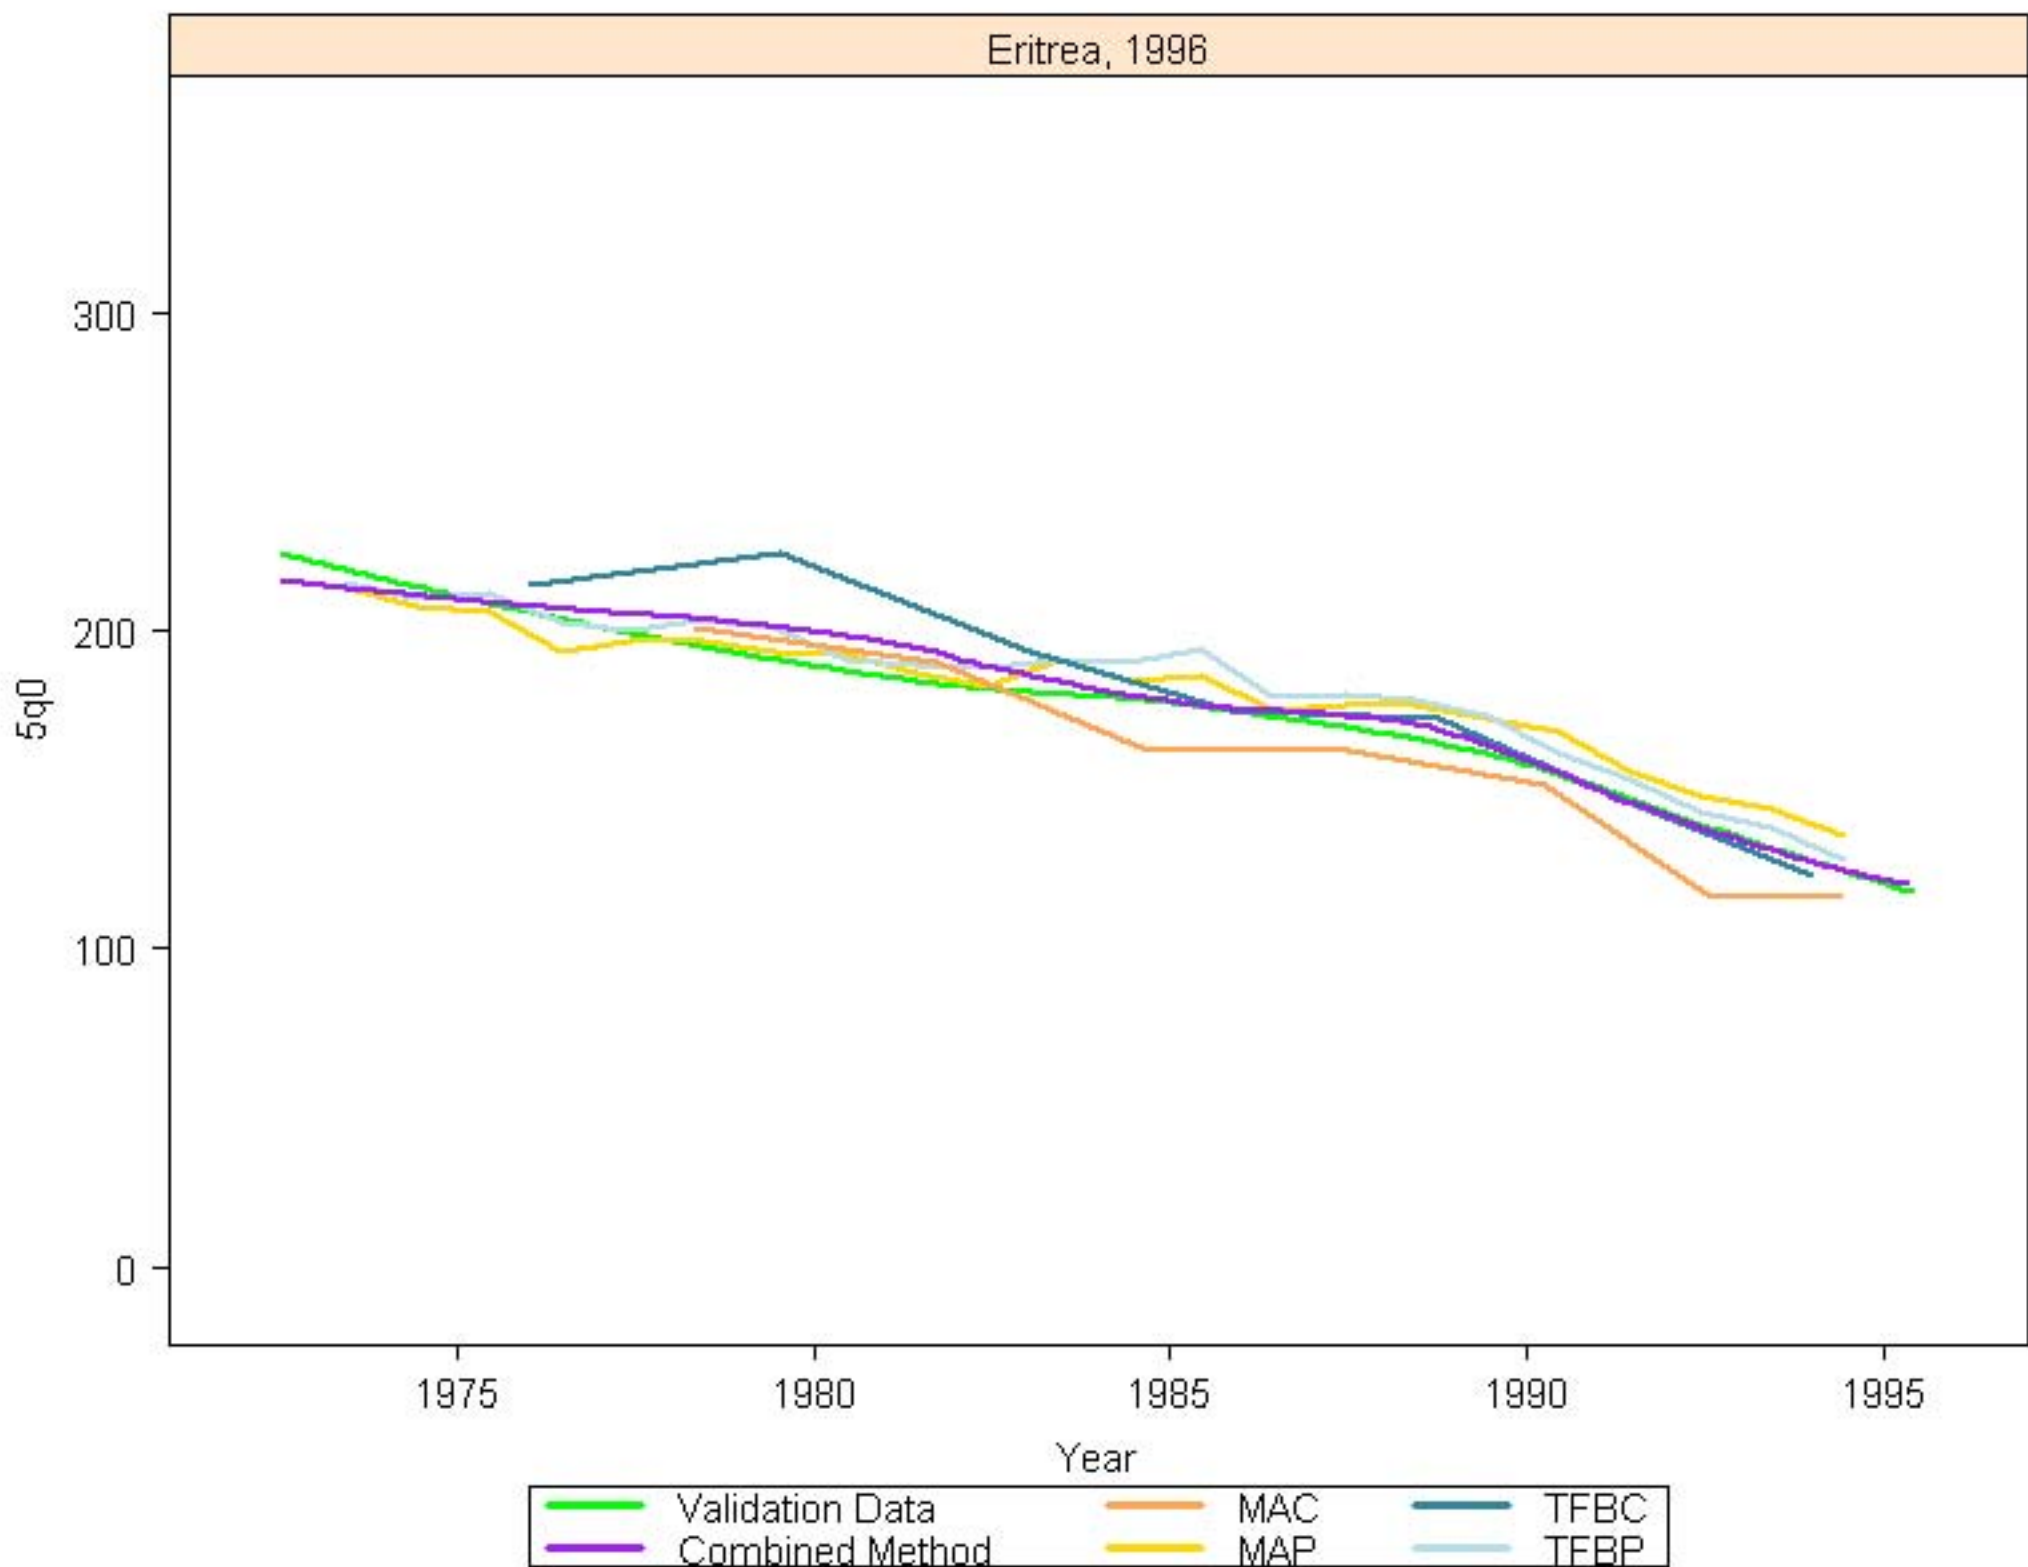

Ethiopia, 2000

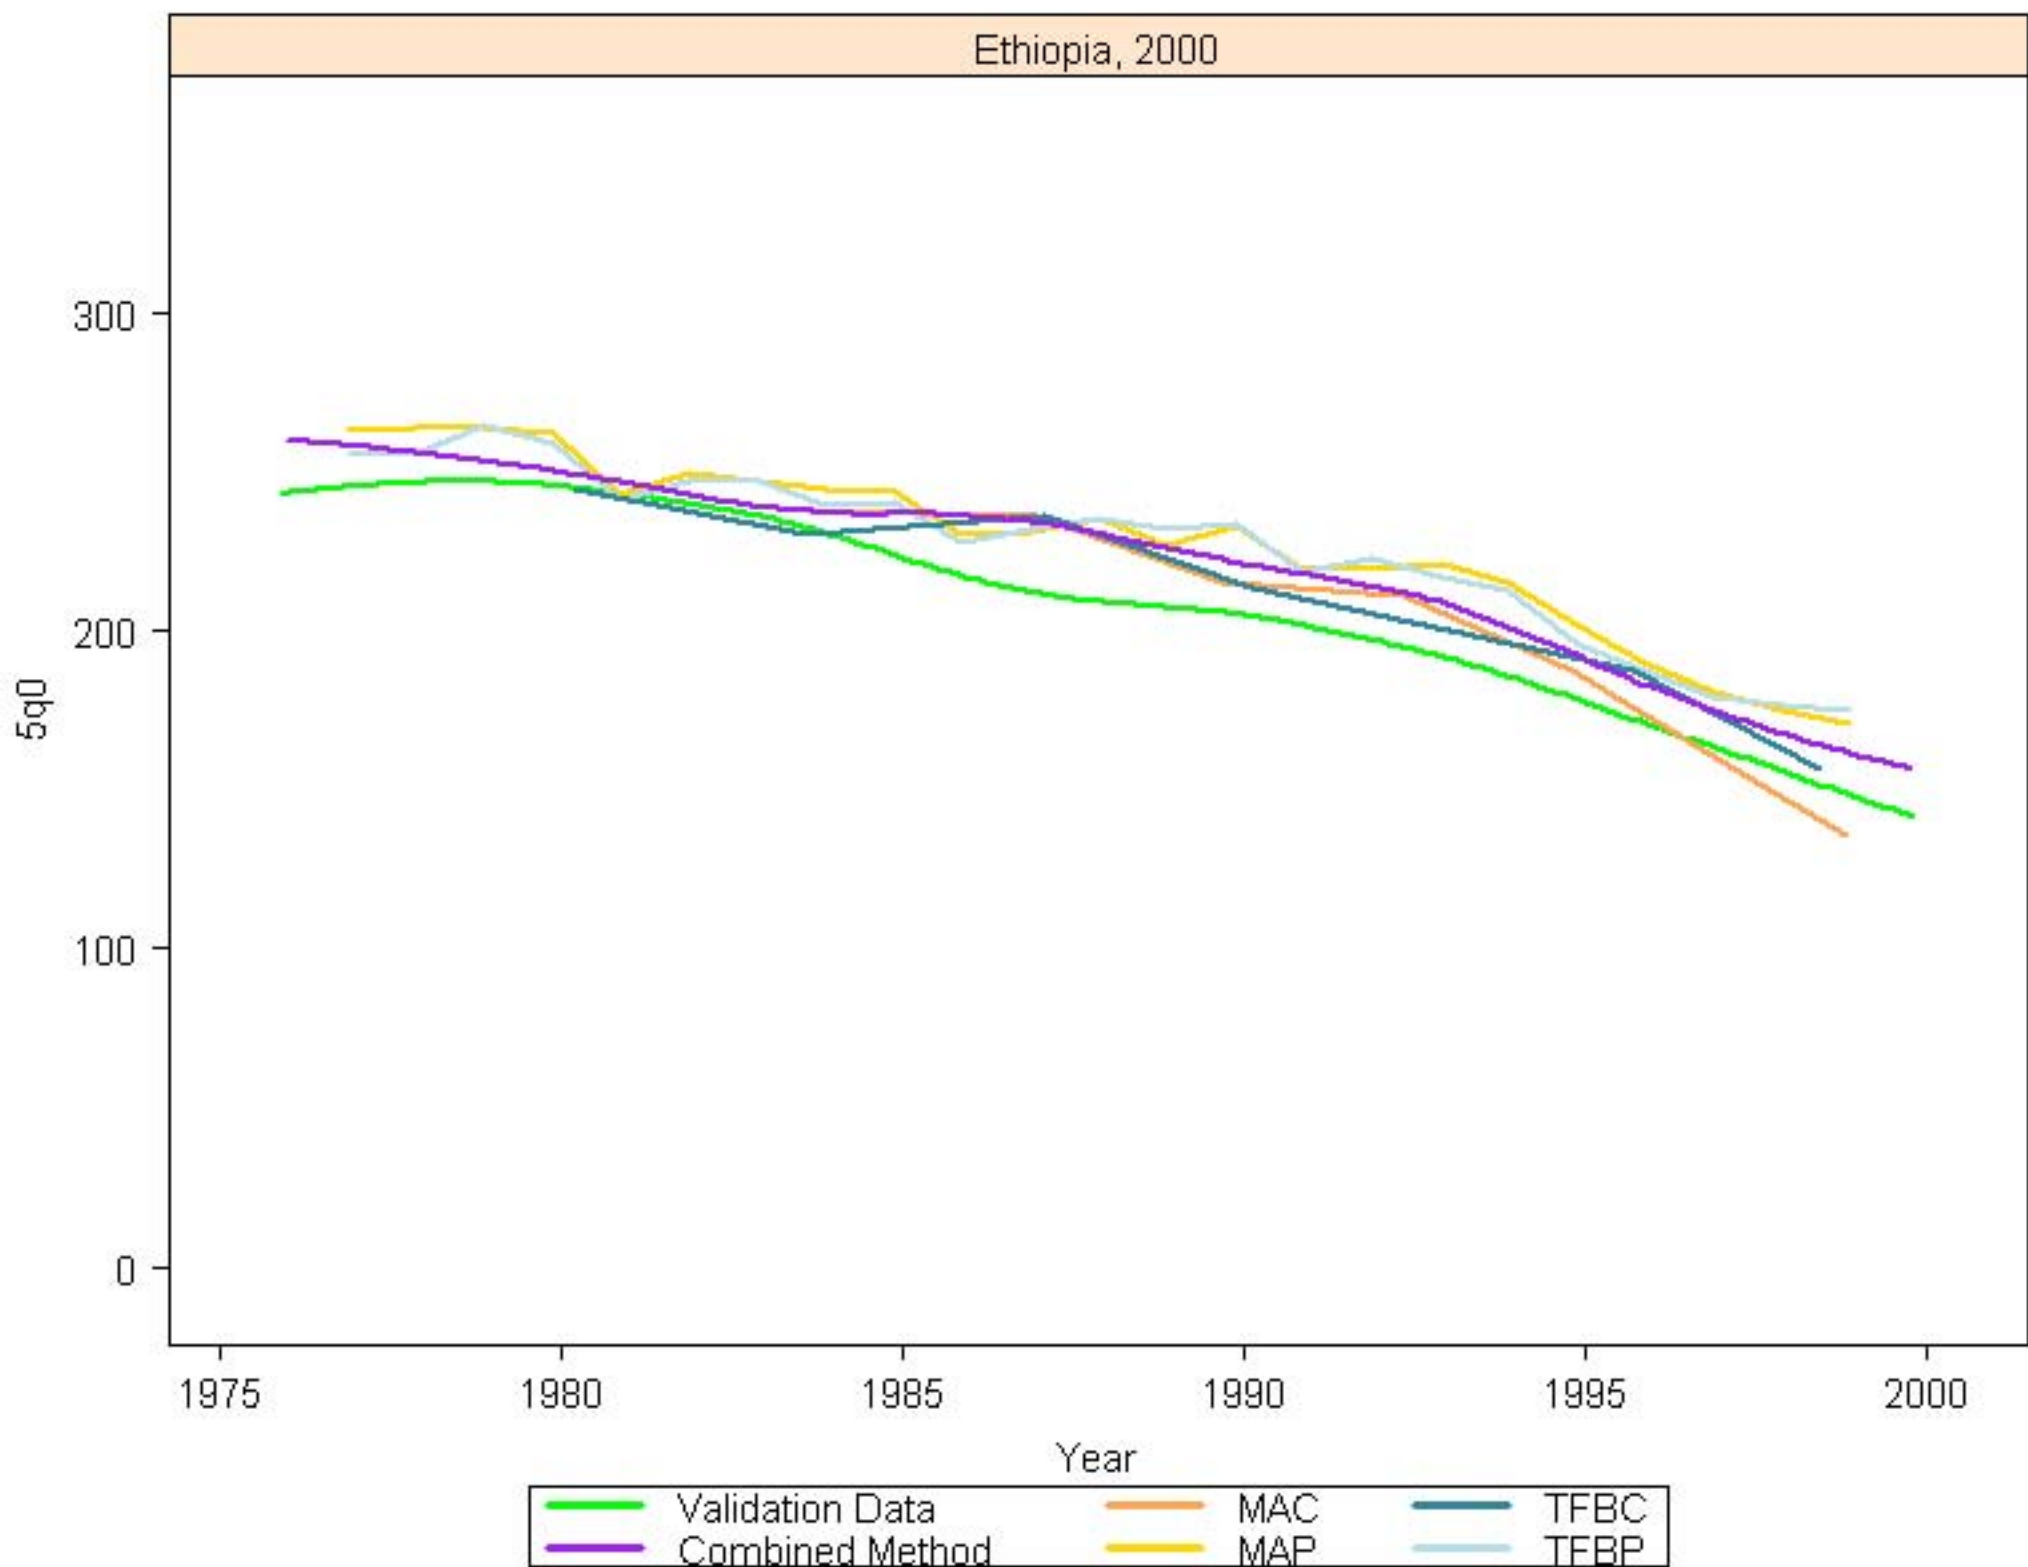

- Validation Data
- MAC
- TFBC
- Combined Method
- MAP
- TFBP

Ethiopia, 2006

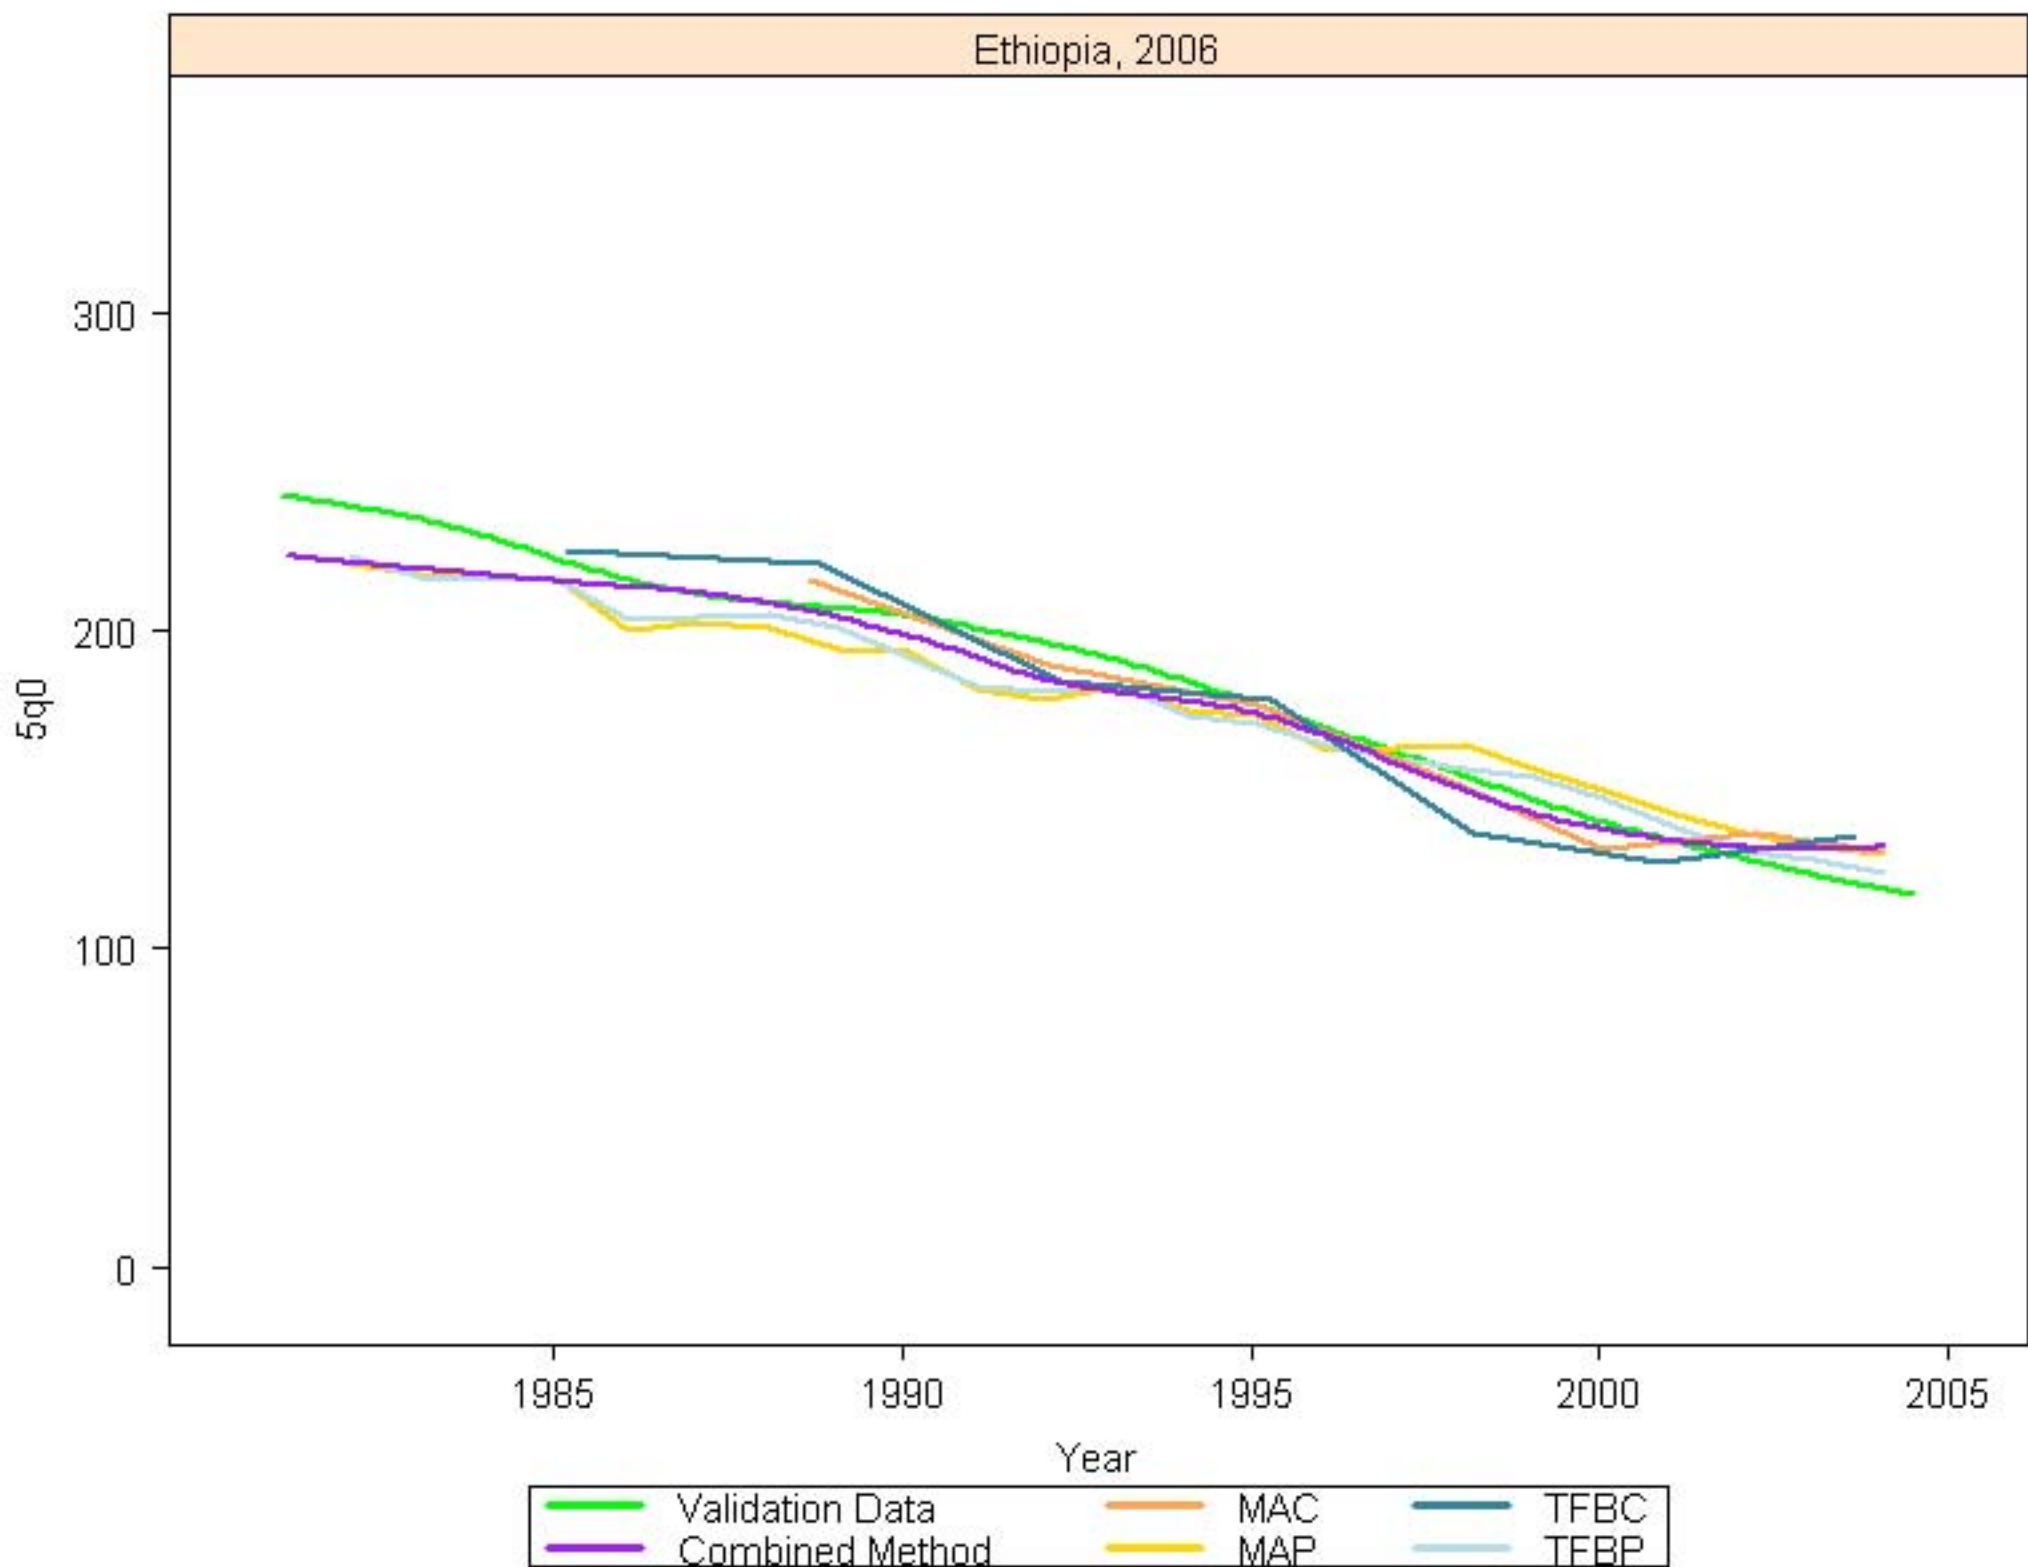

Gabon, 2001

5q0

300  
200  
100  
0

1980 1985 1990 1995 2000

Year

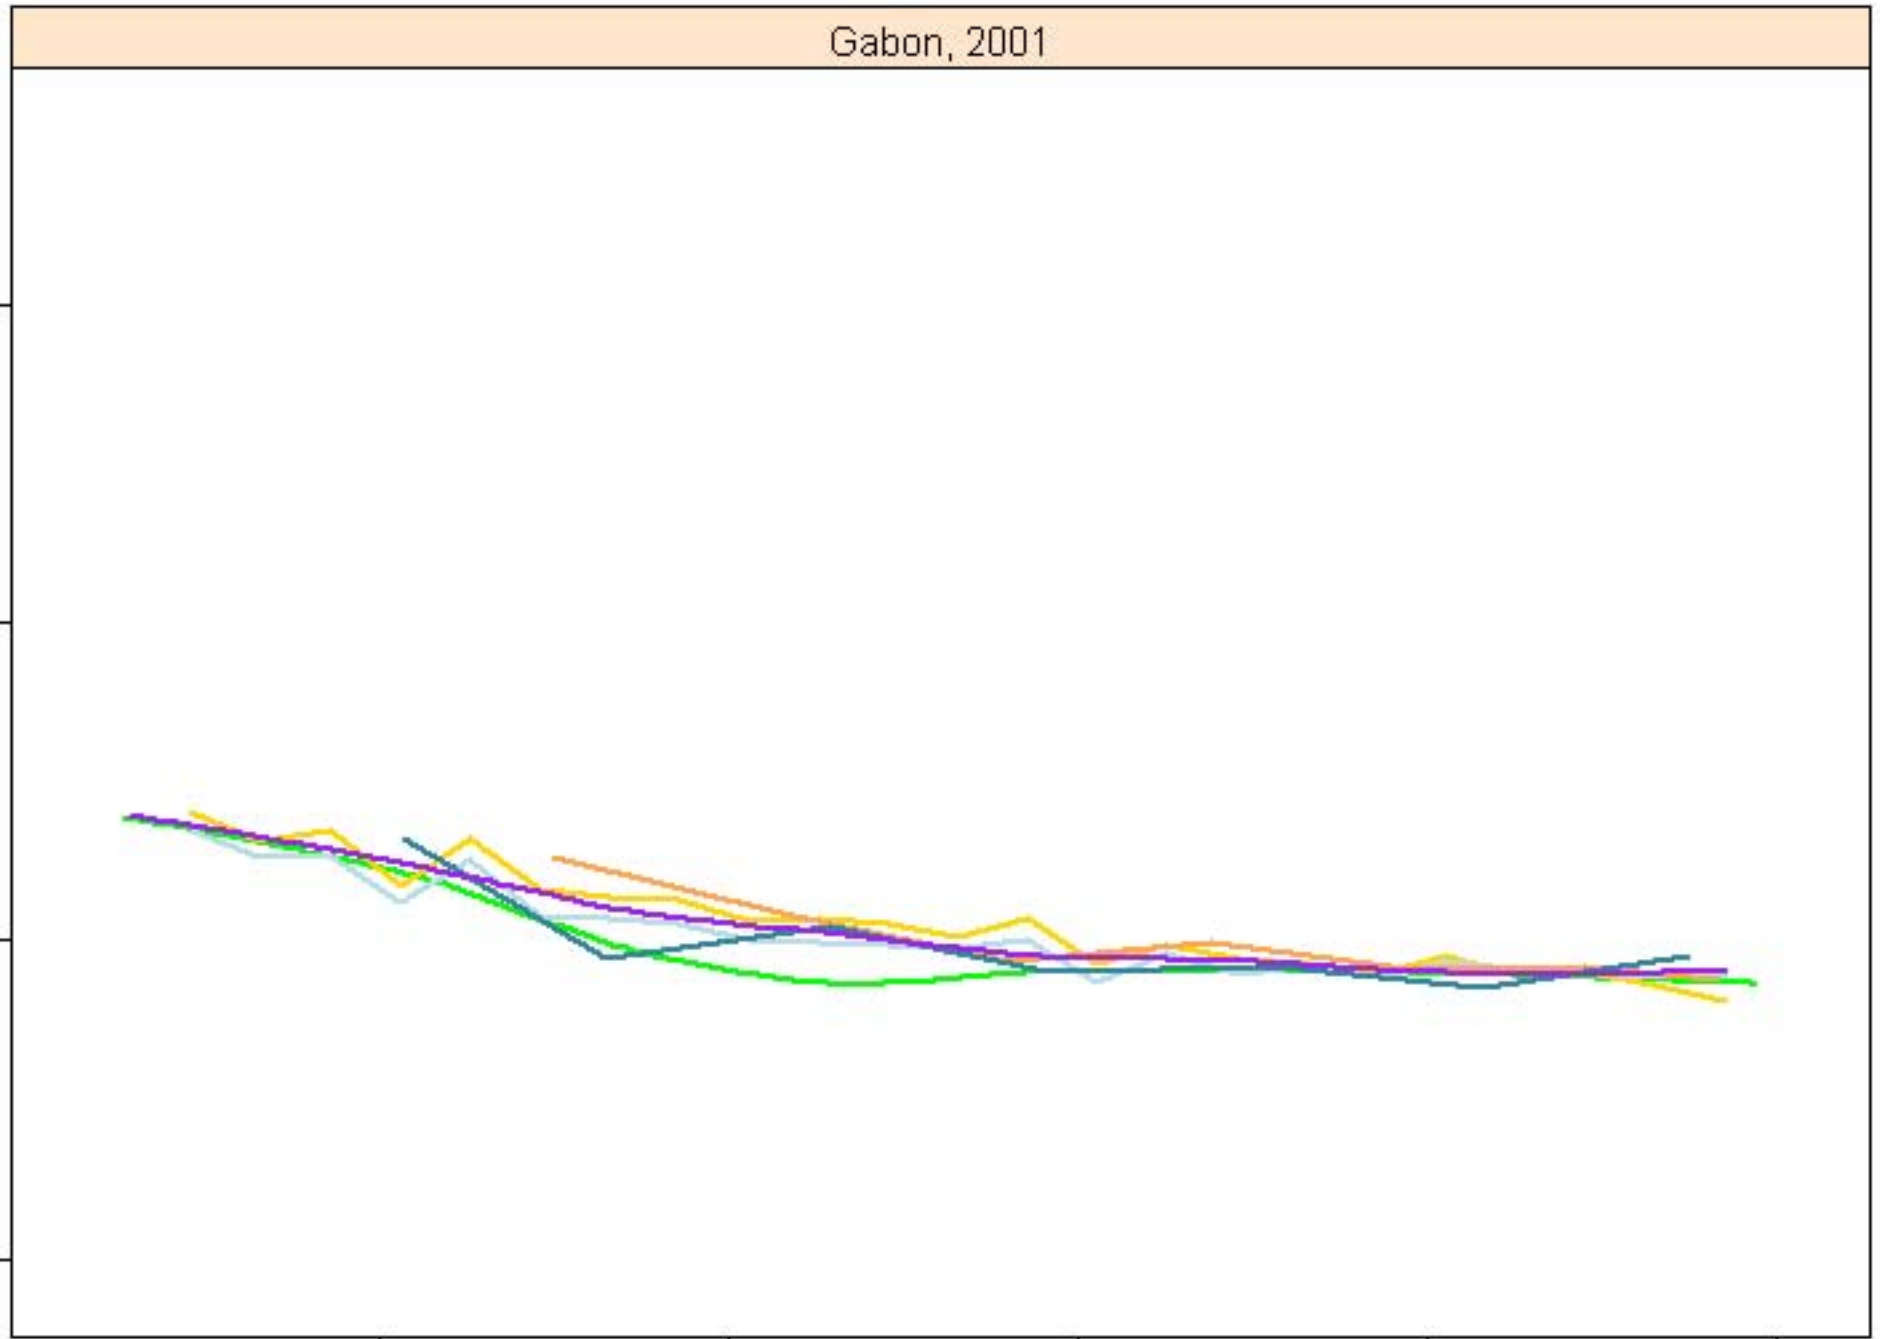

Ghana, 1988

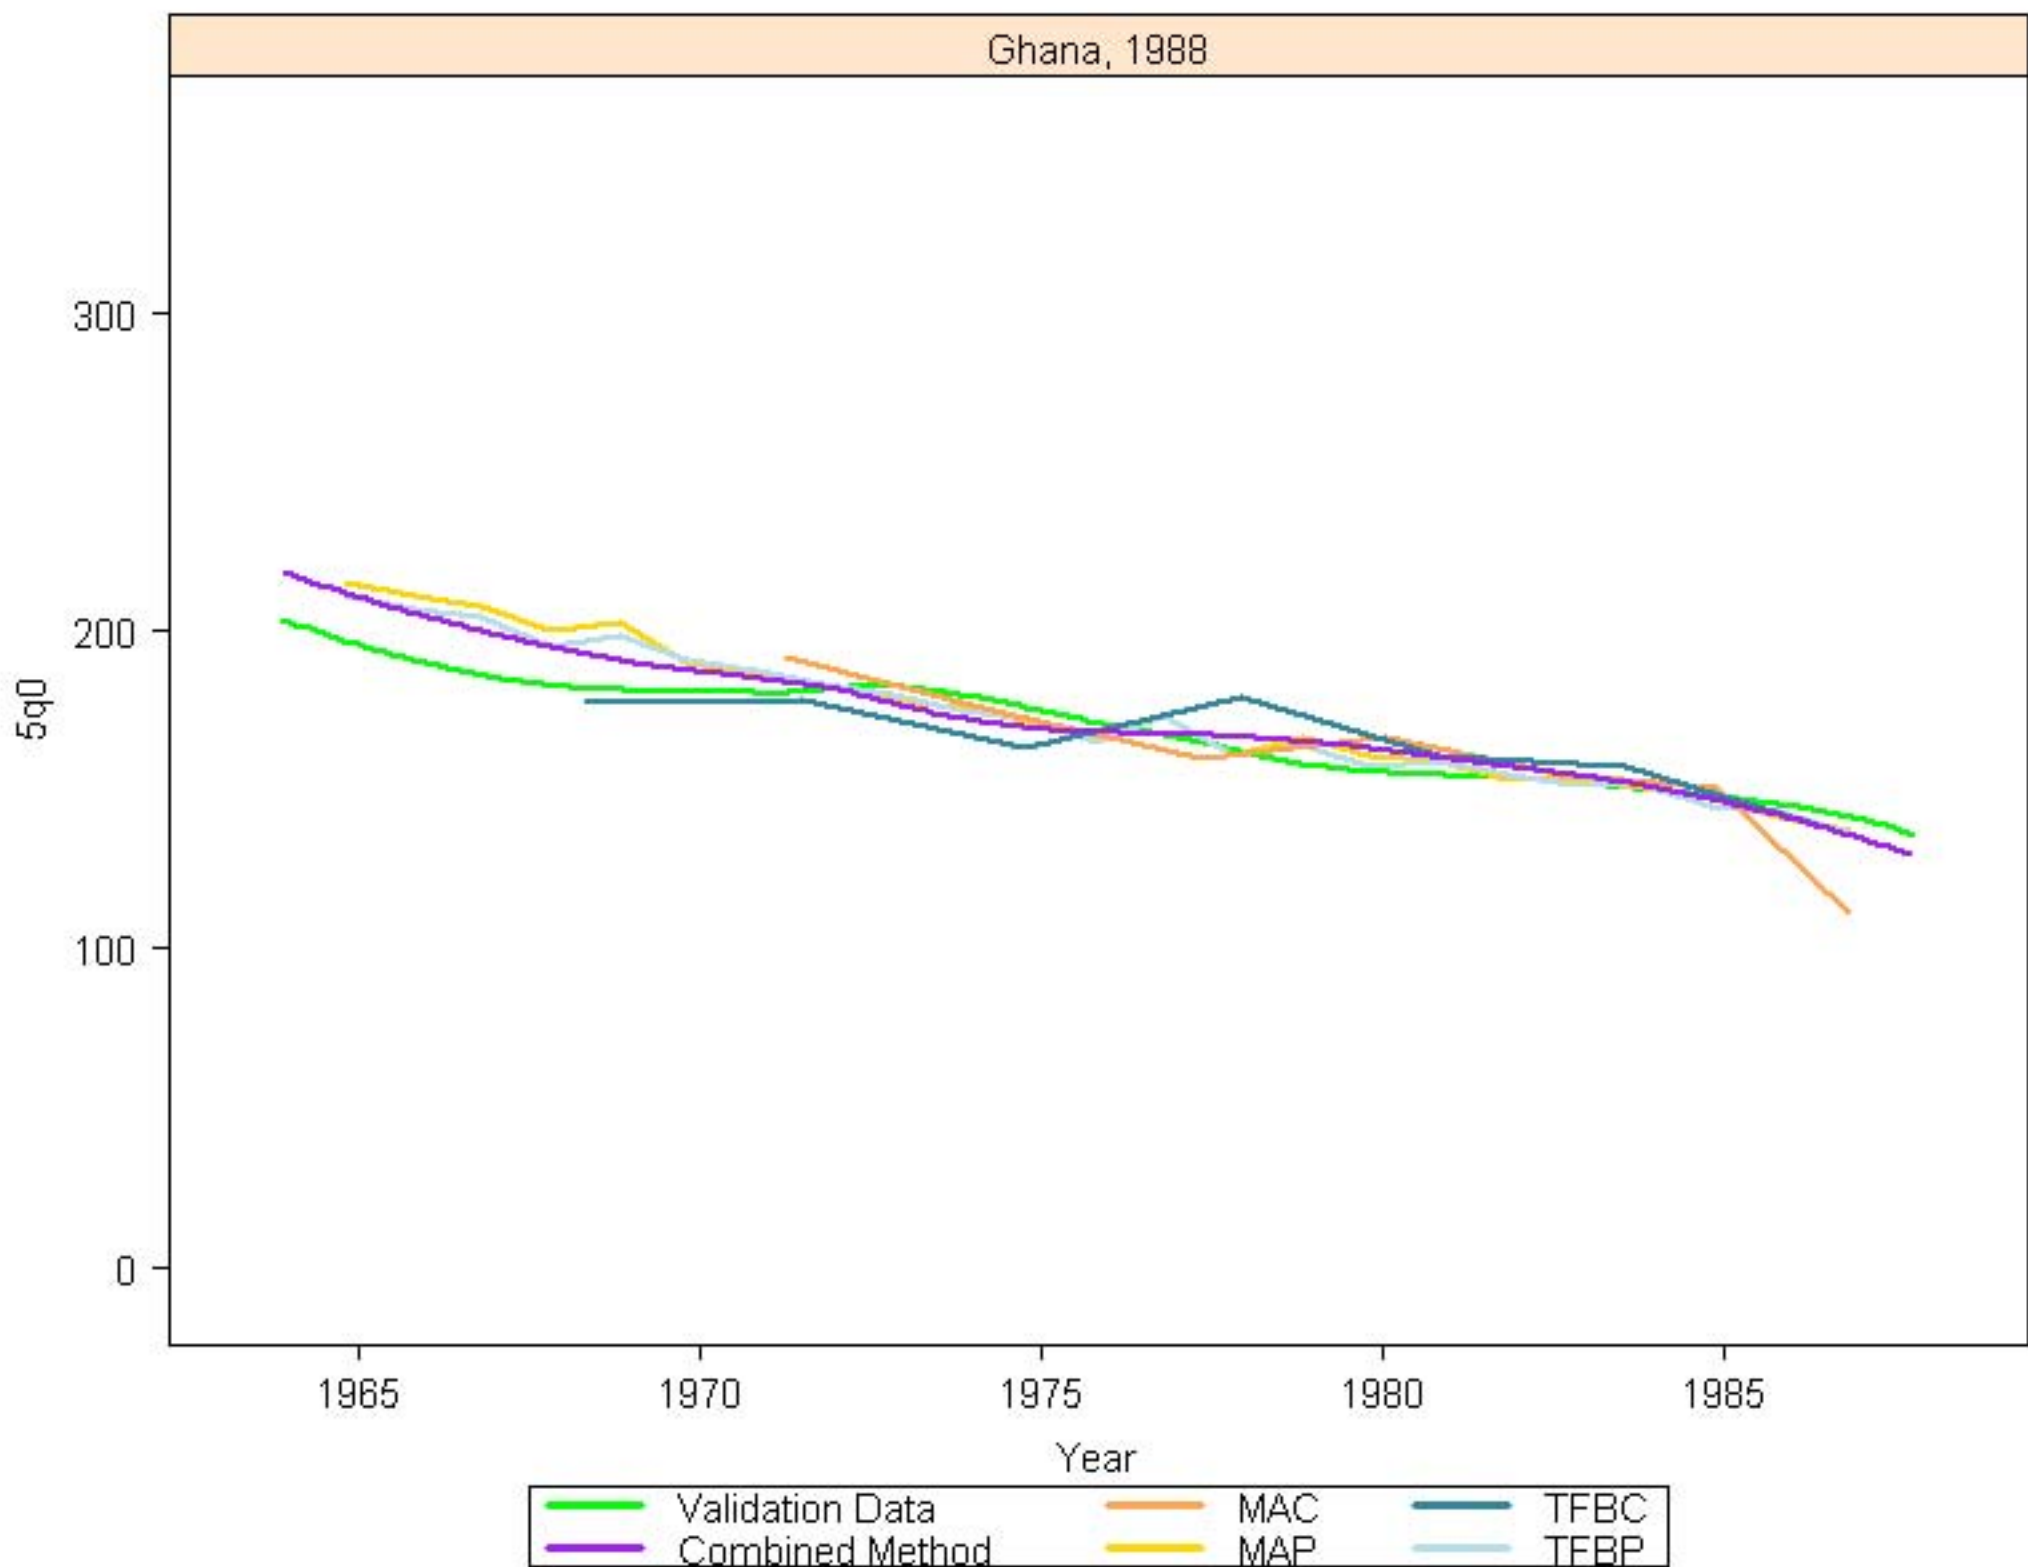



Ghana, 1994

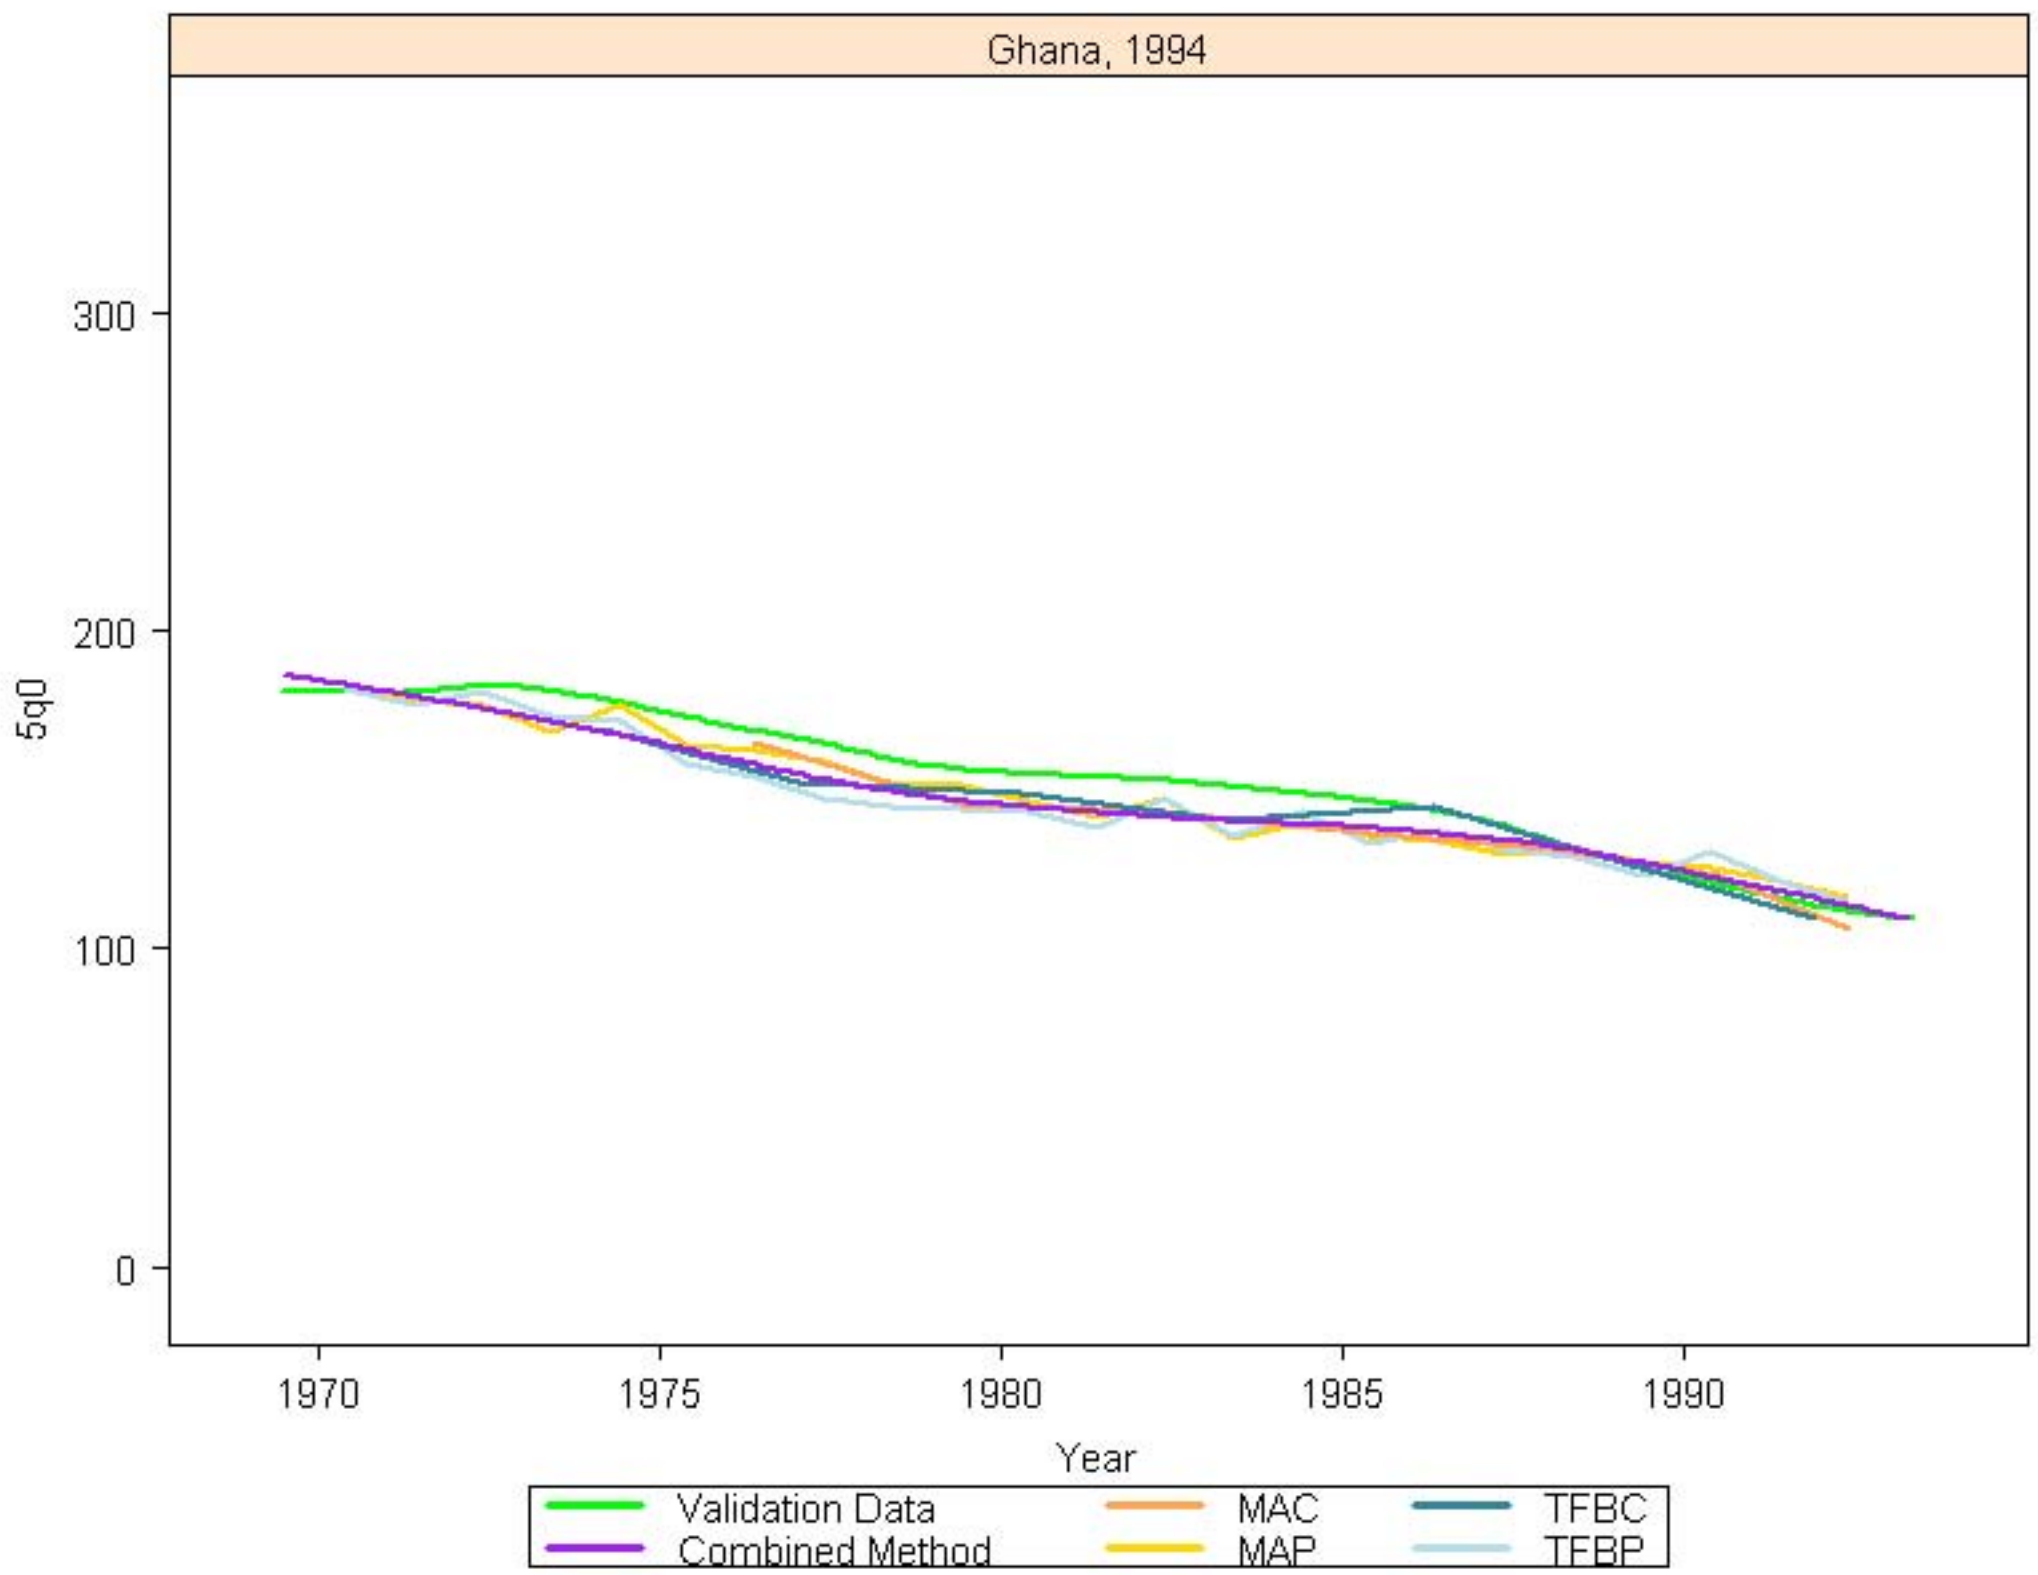

Ghana, 1999

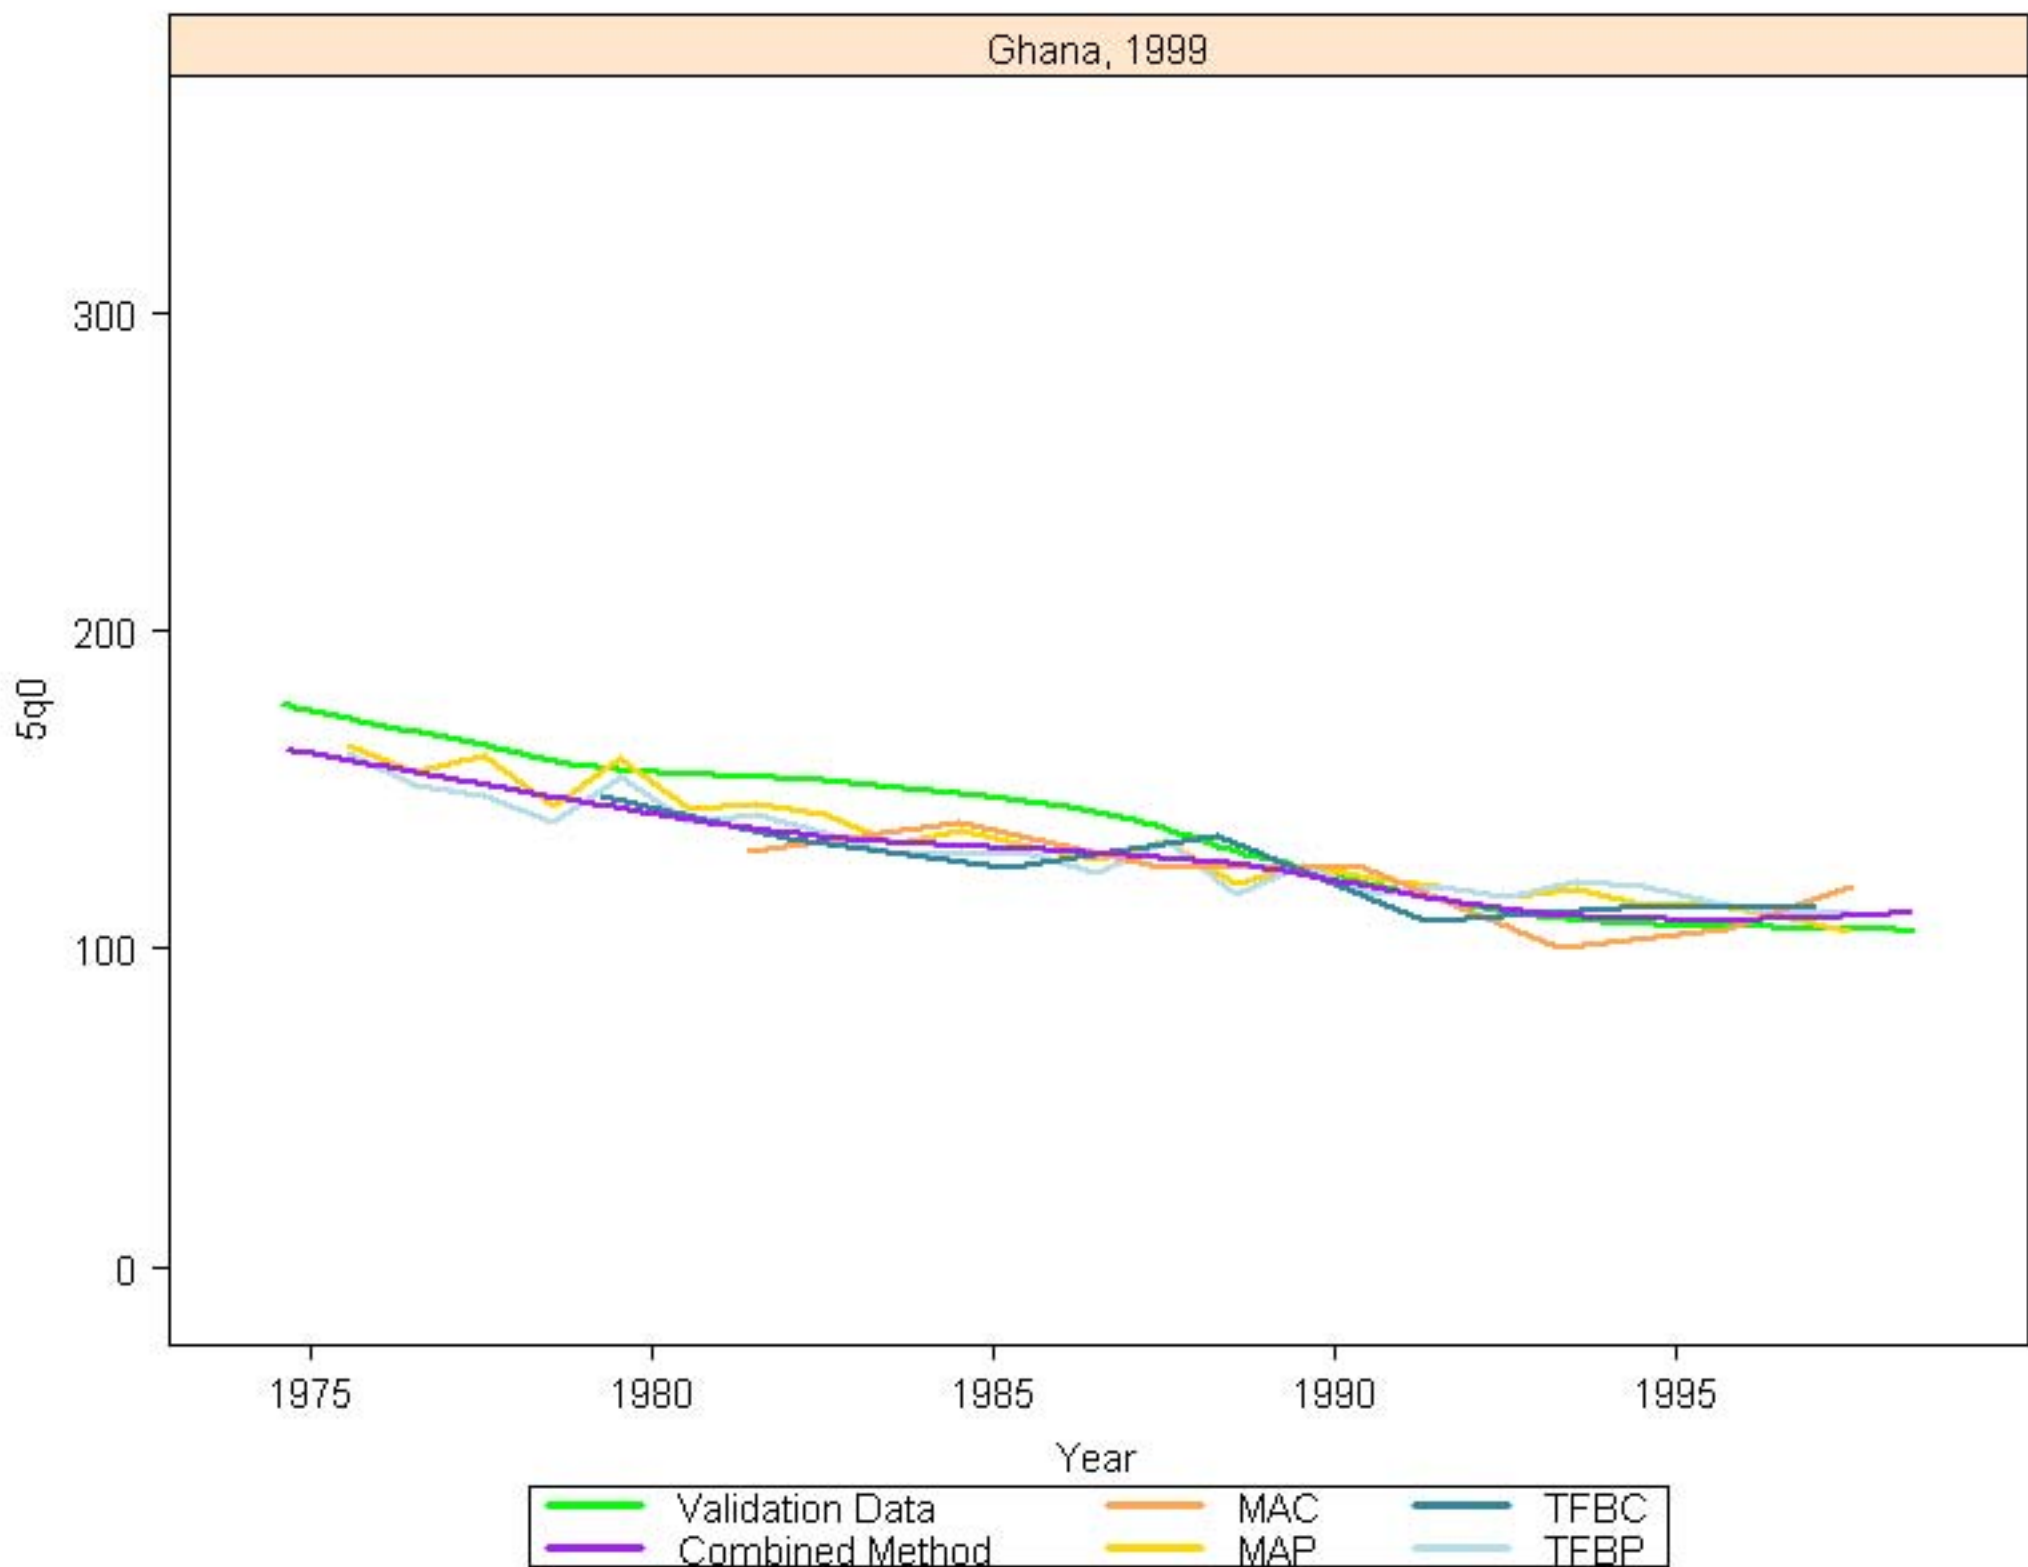

# Ghana, 2004

5q0

300  
200  
100  
0

1980 1985 1990 1995 2000

Year

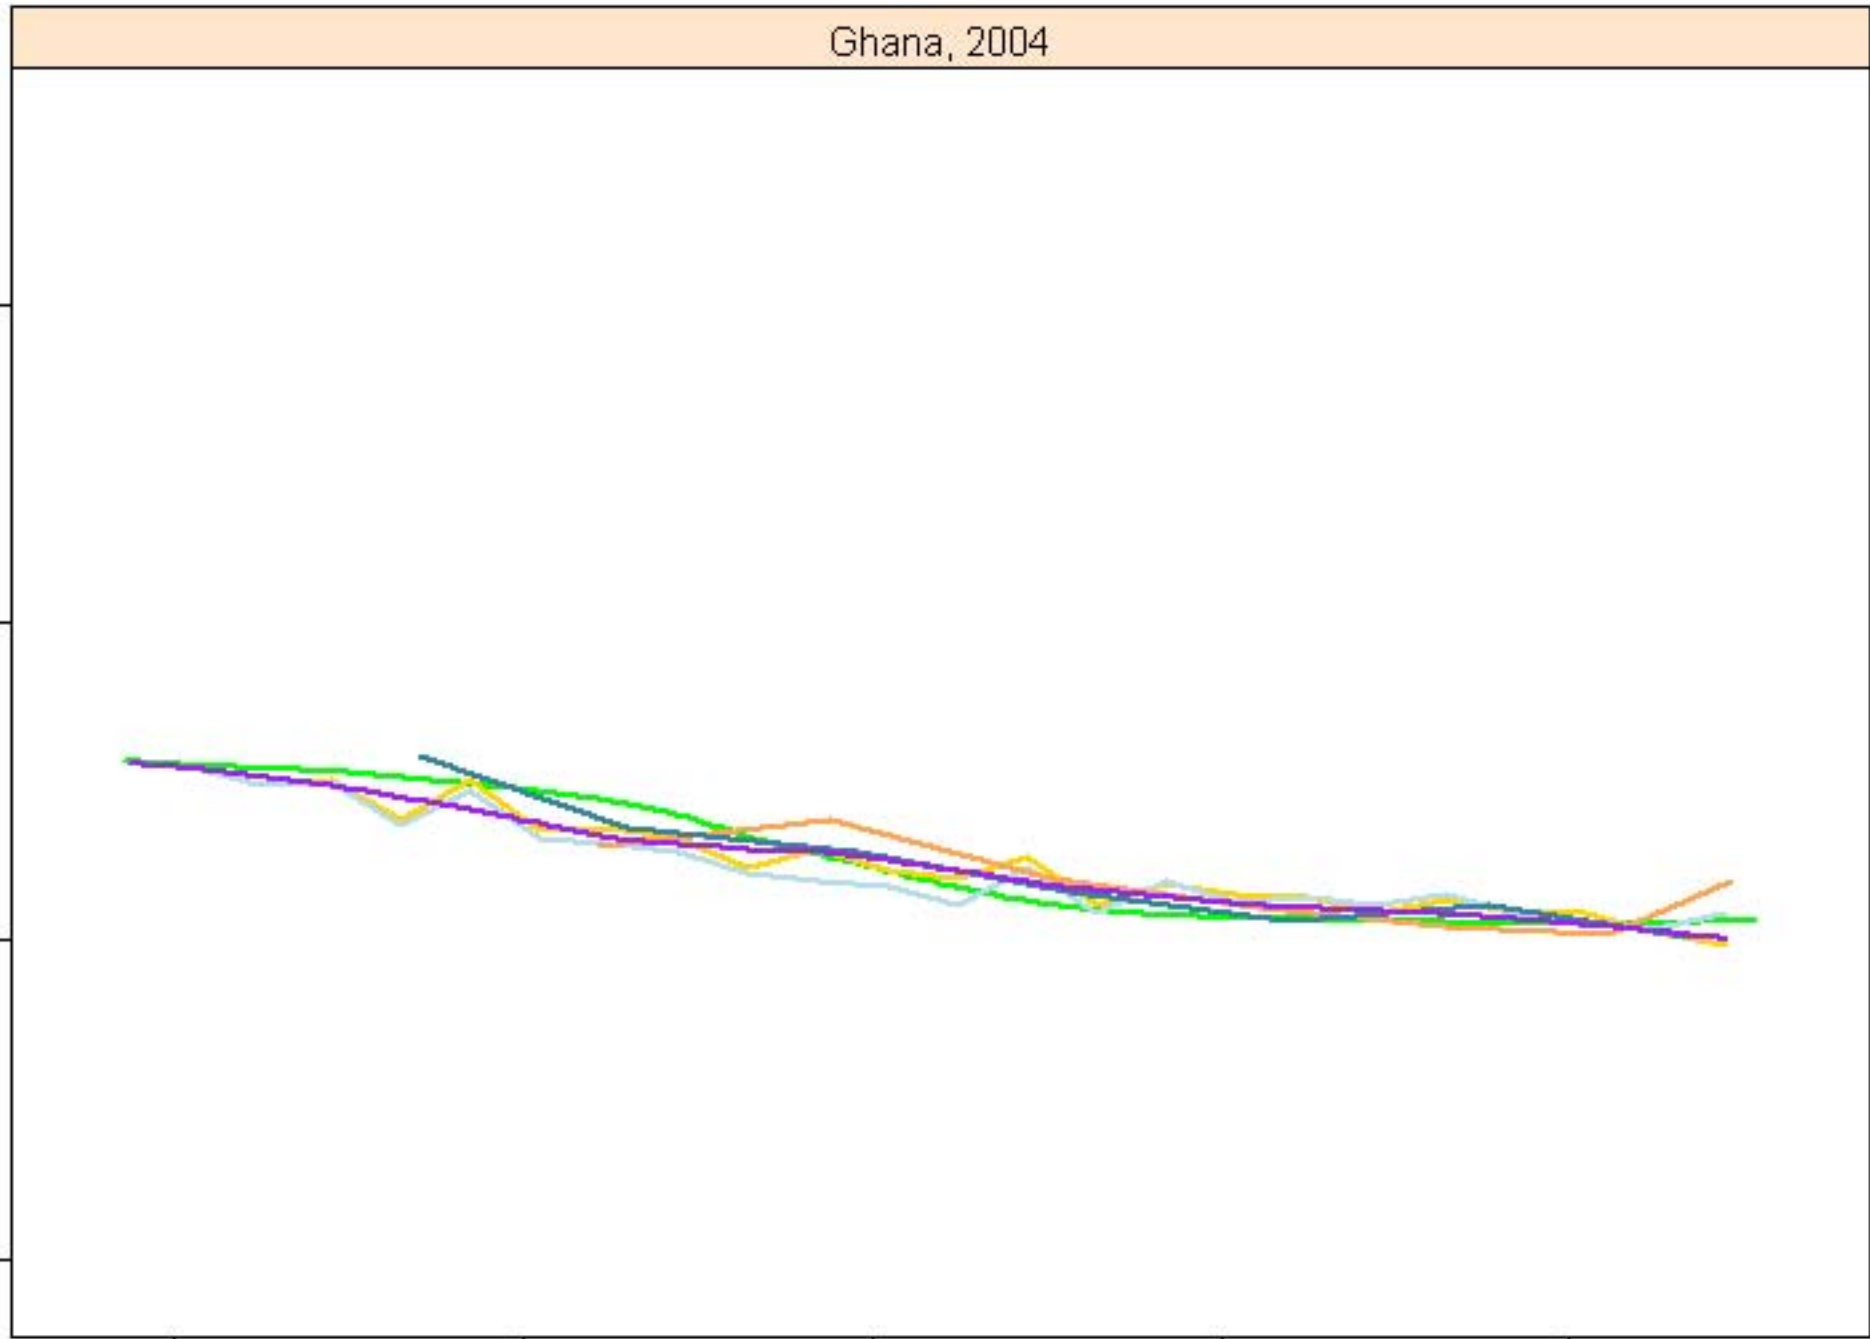

Guatemala, 1988

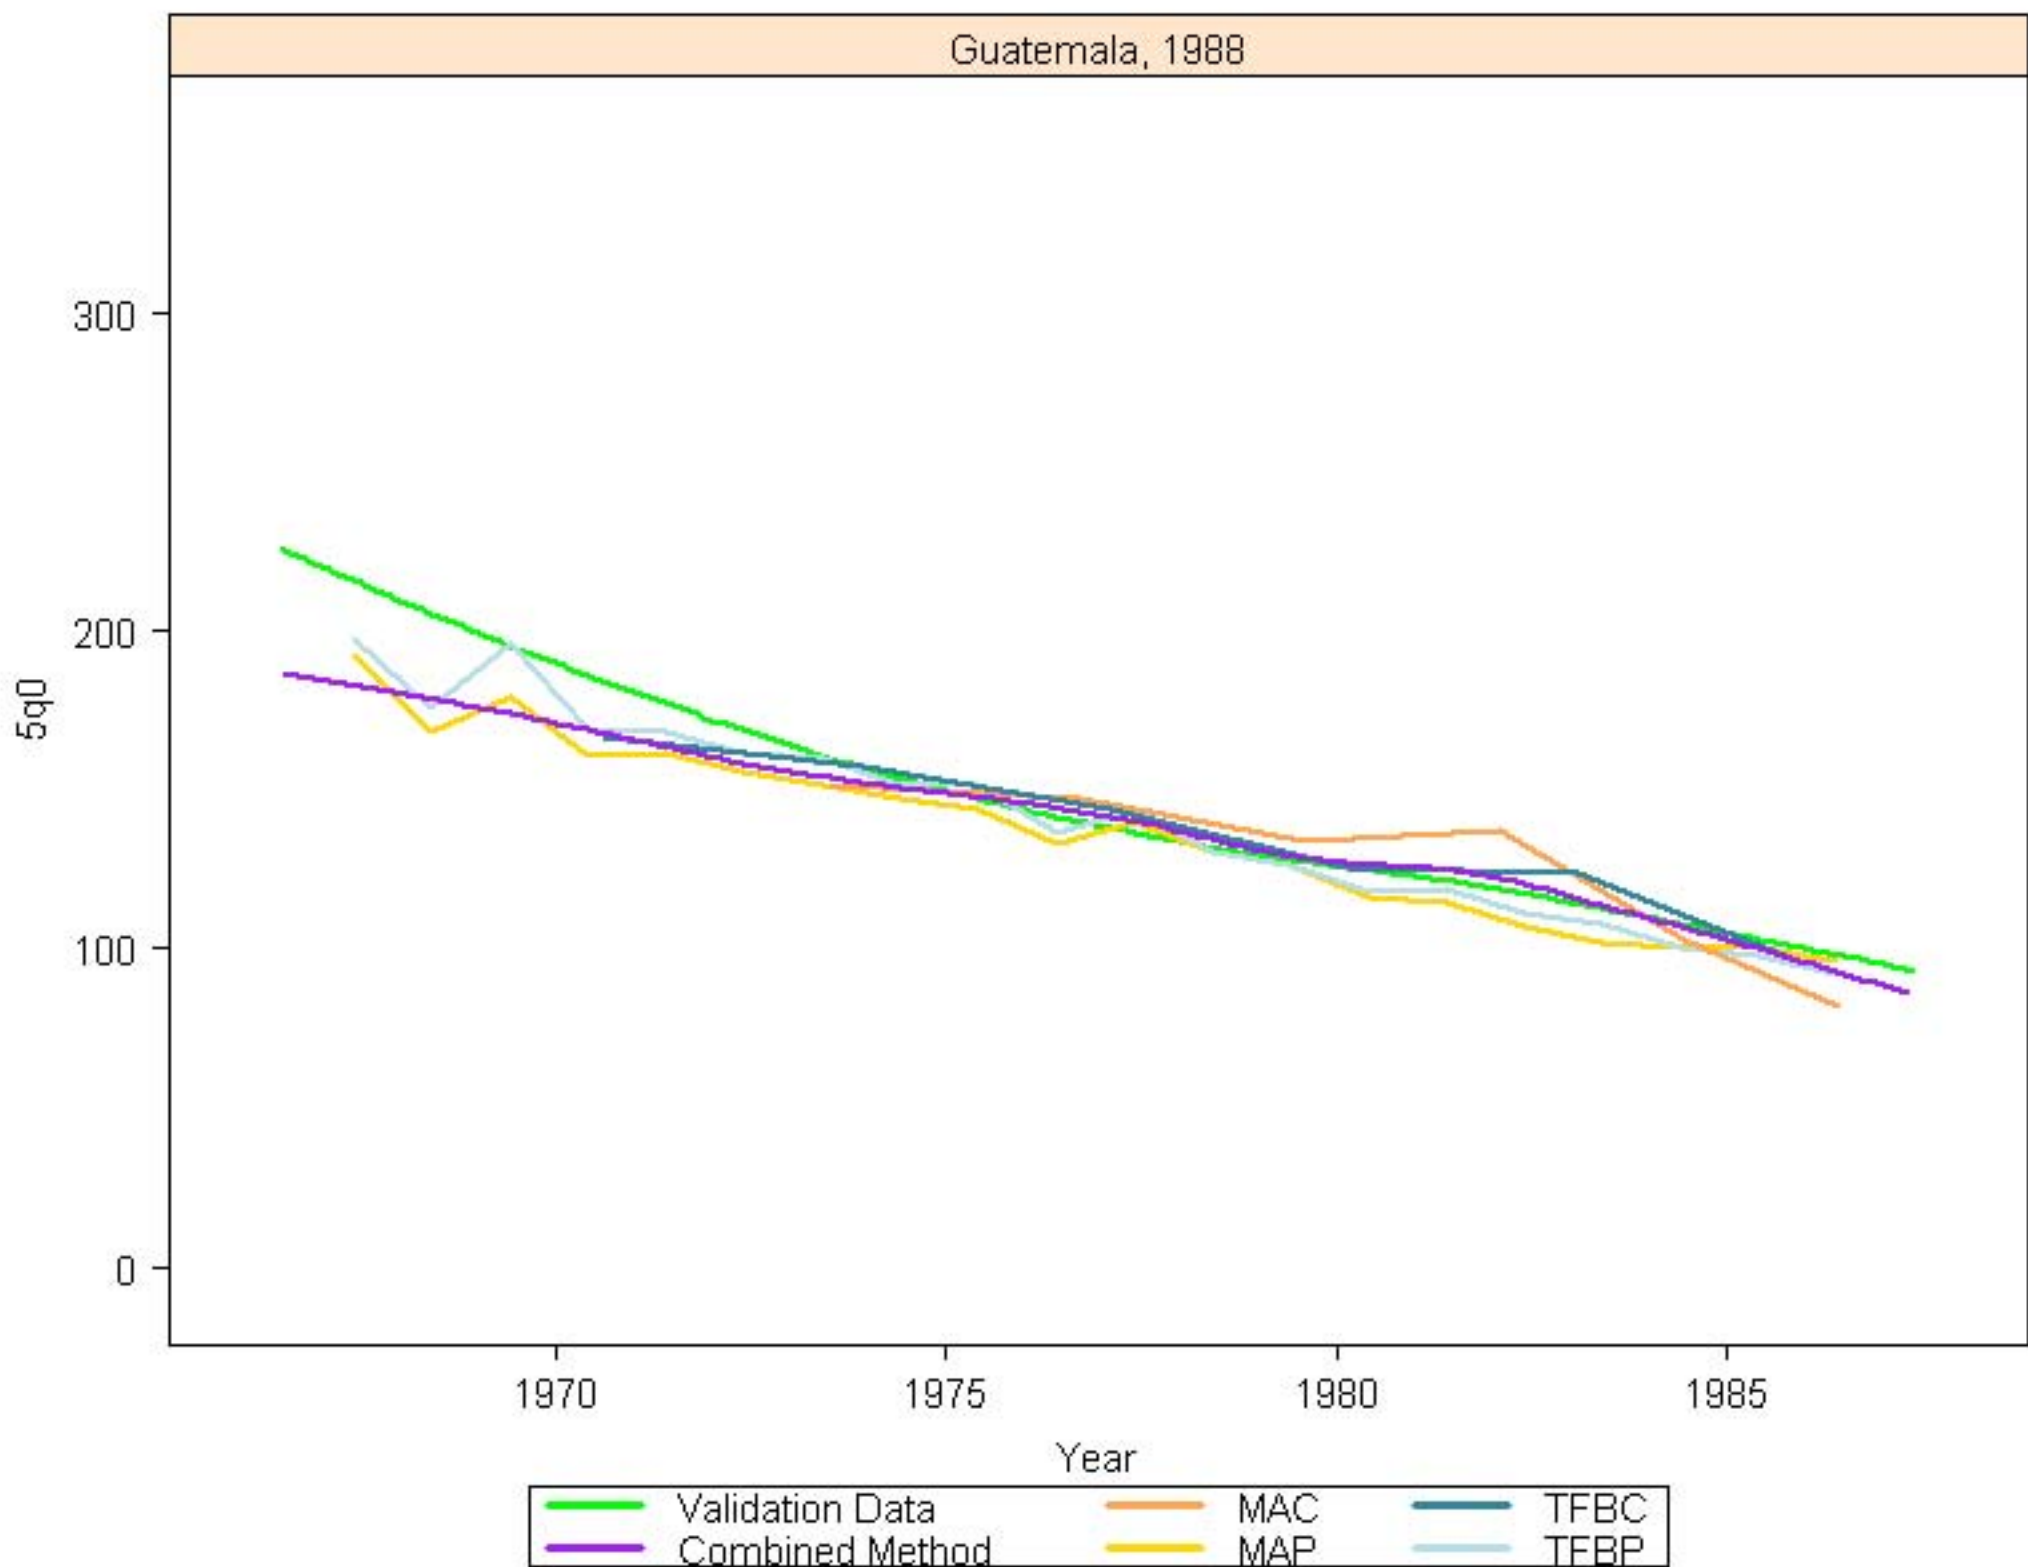

Guatemala, 1996

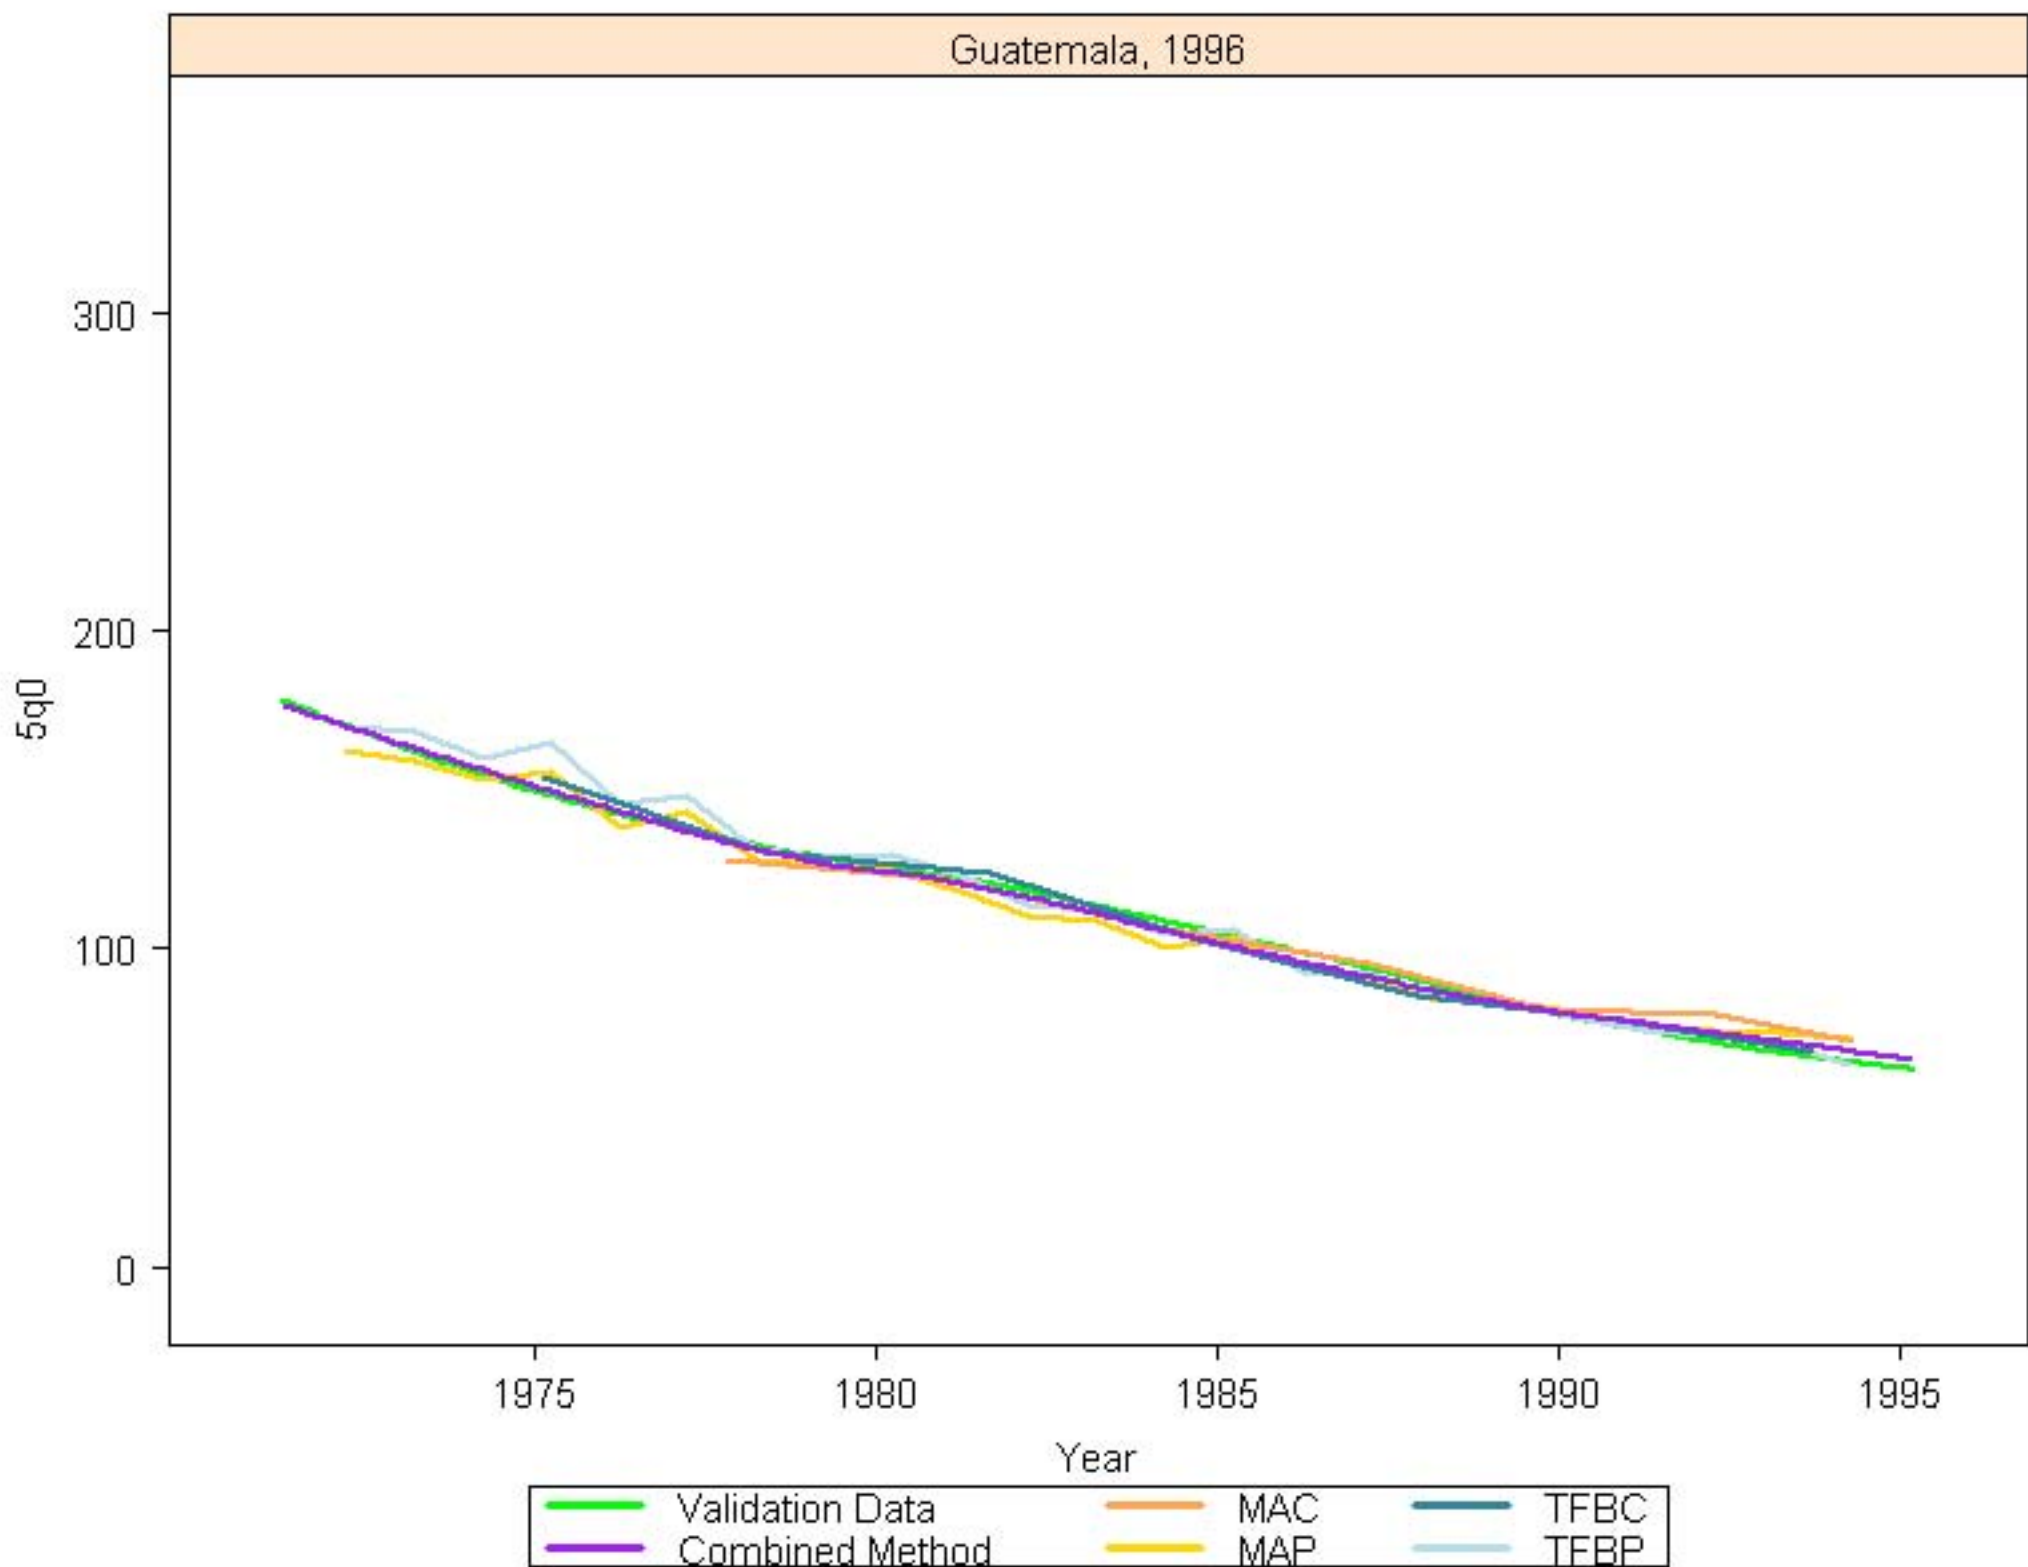

Guatemala, 1999

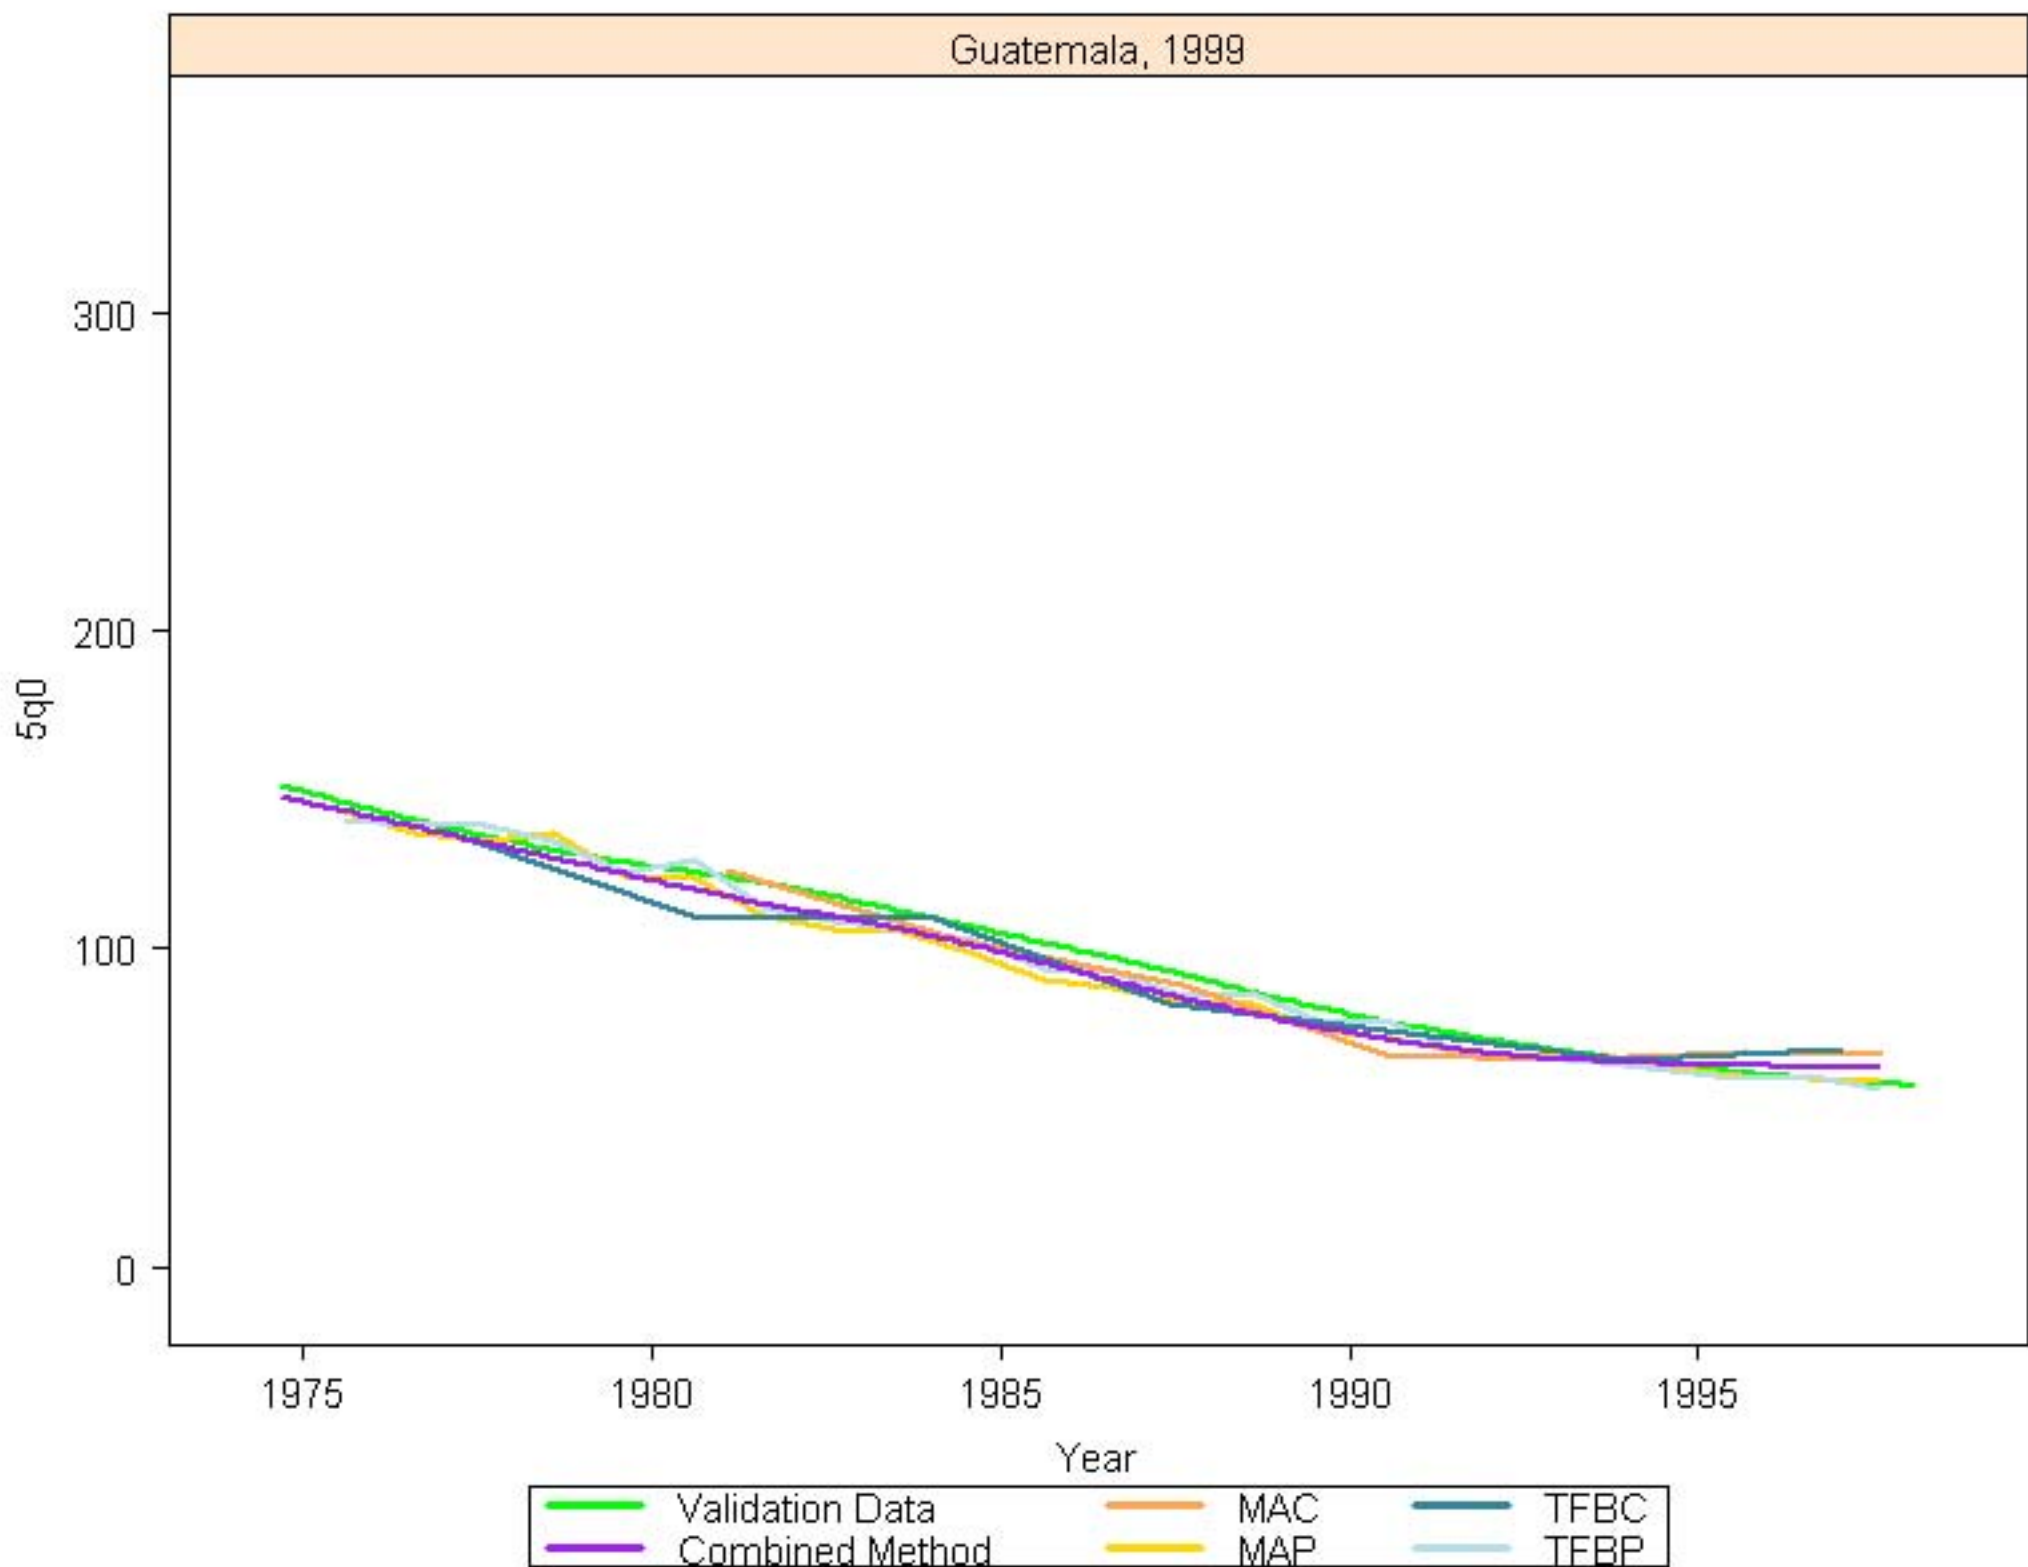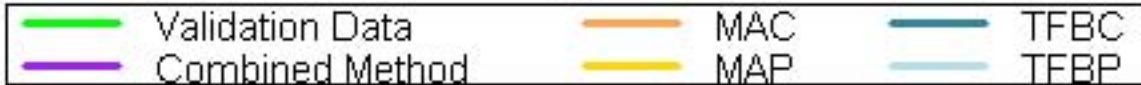

Guinea, 2000

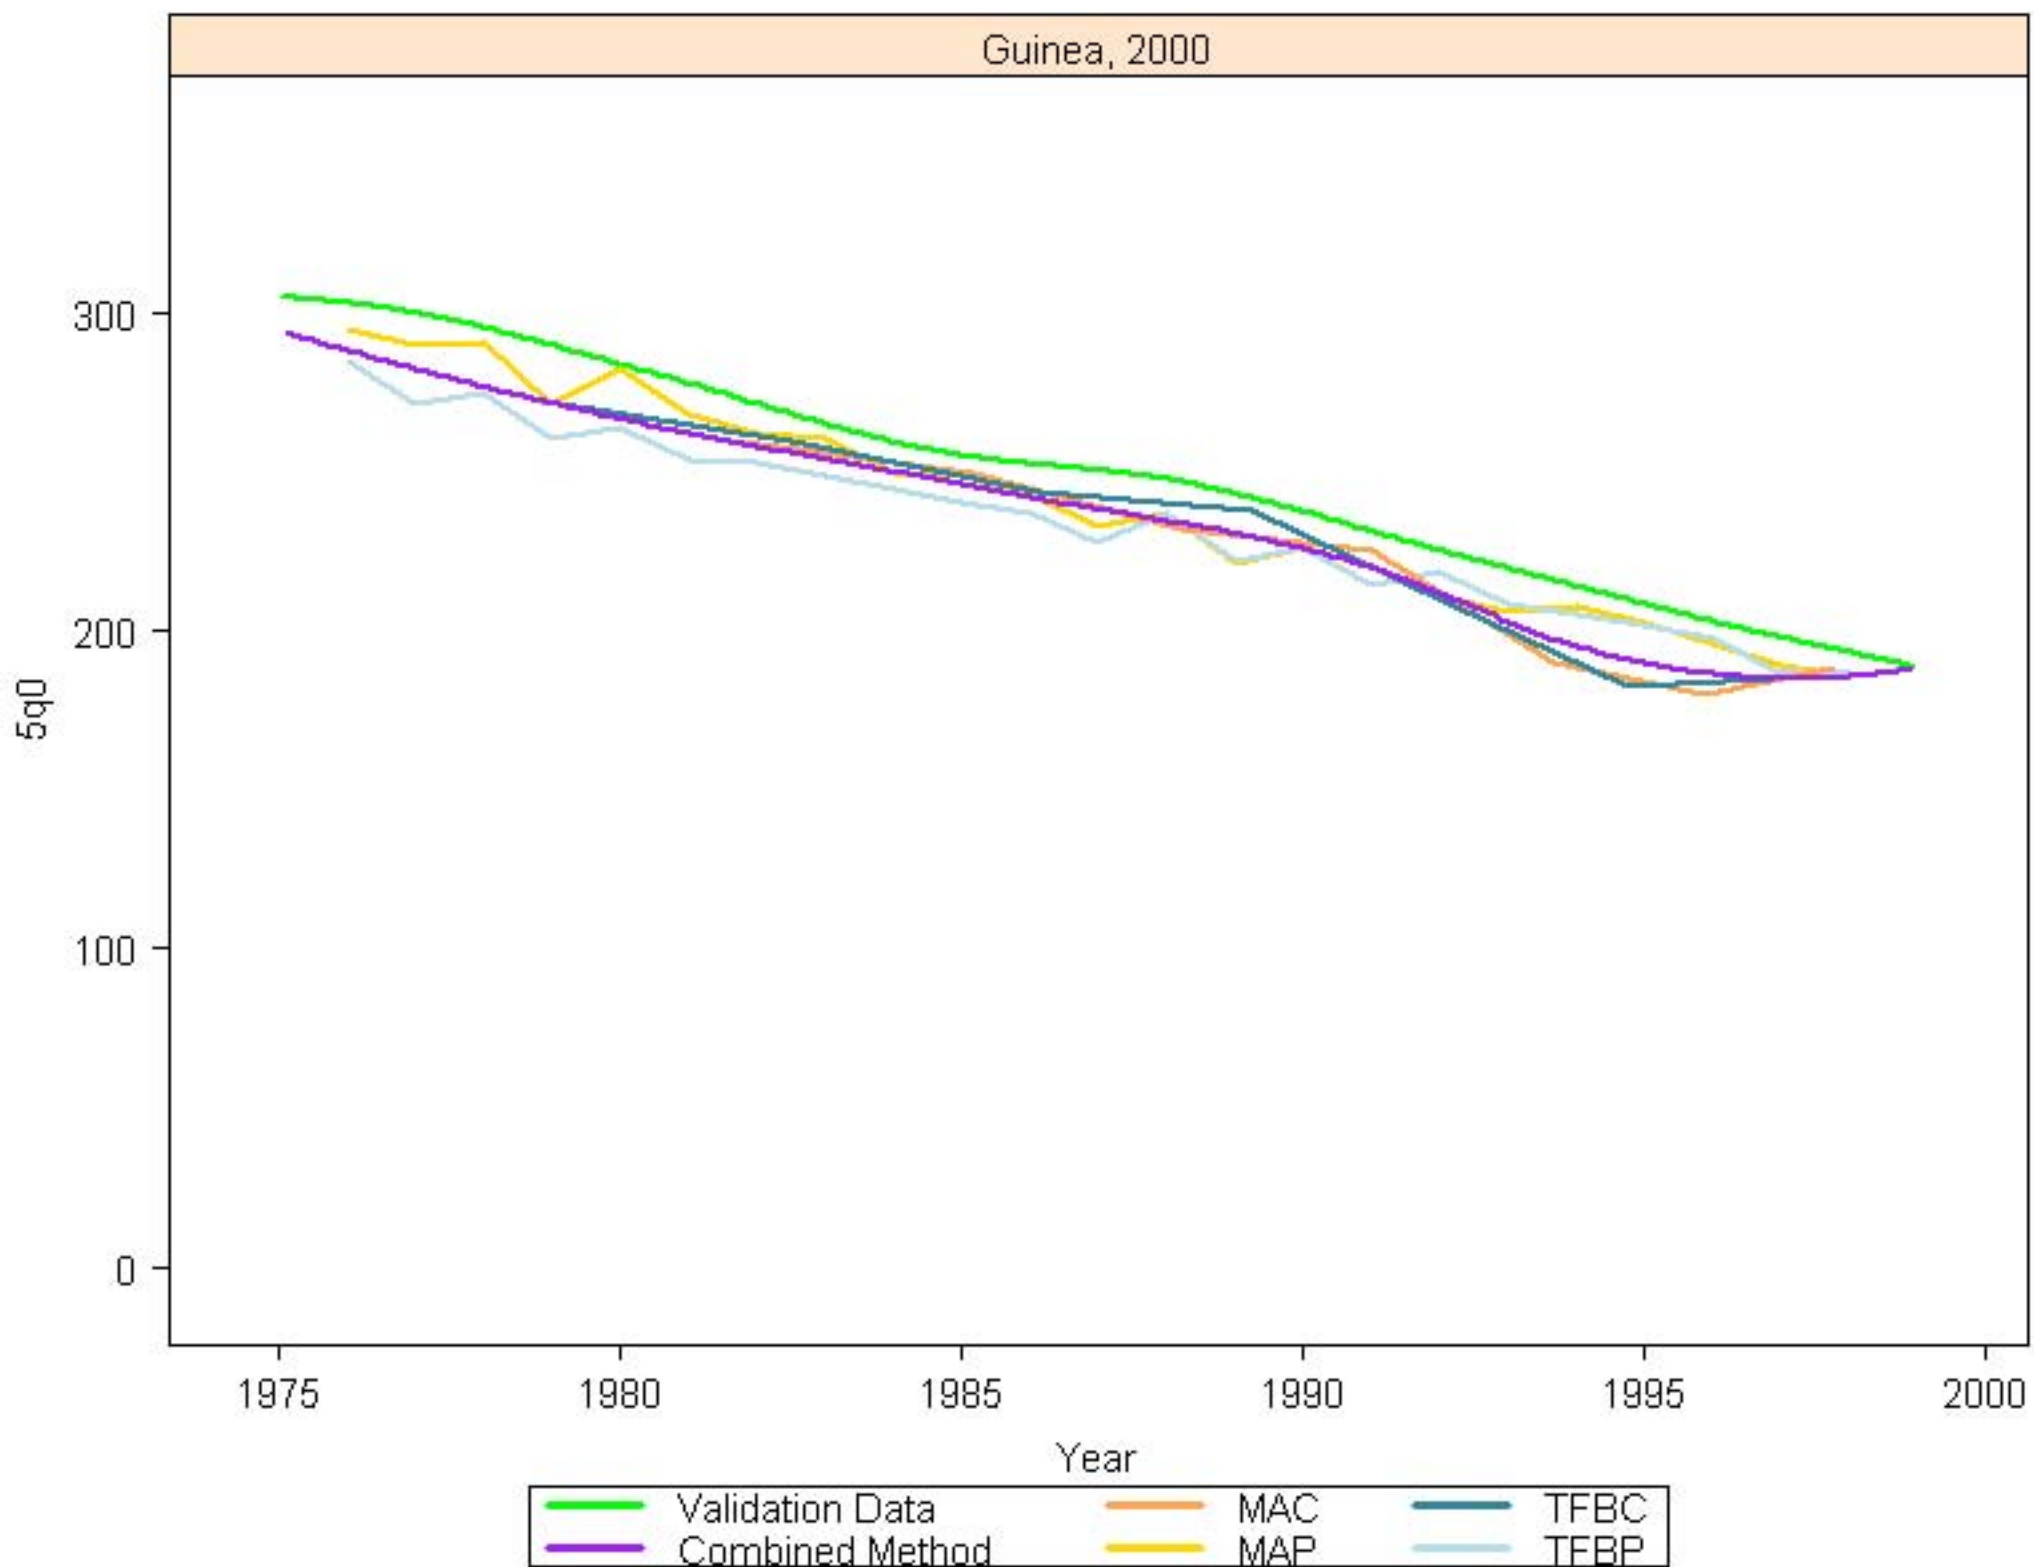

Guinea, 2005

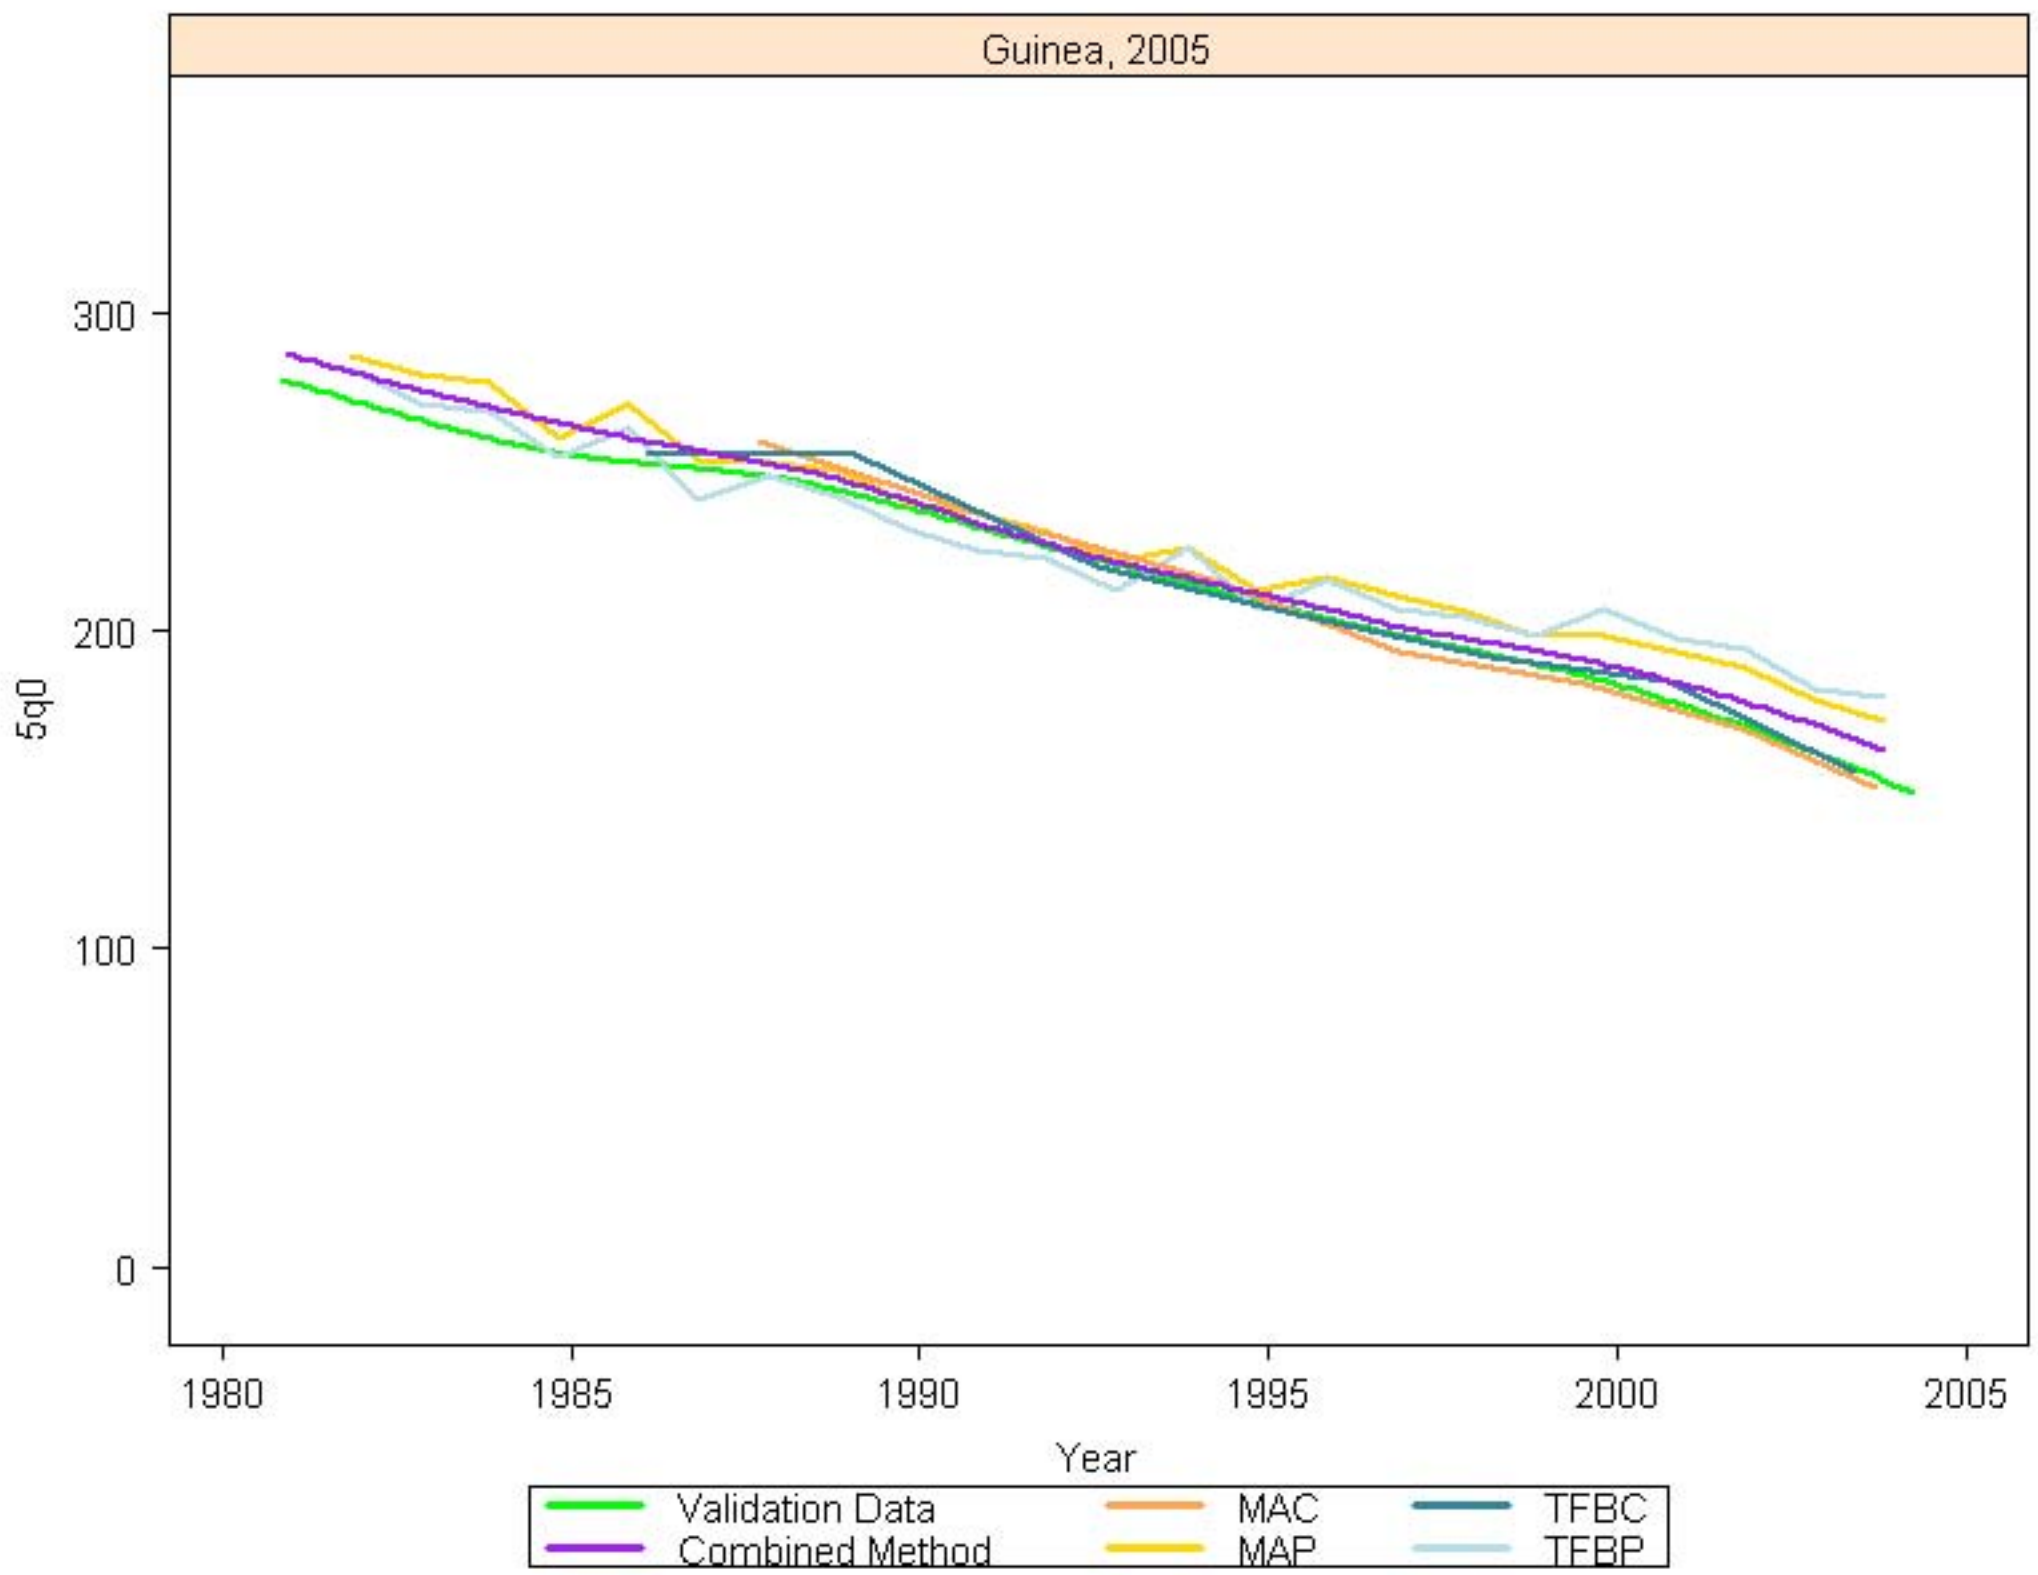



# Haiti, 1995

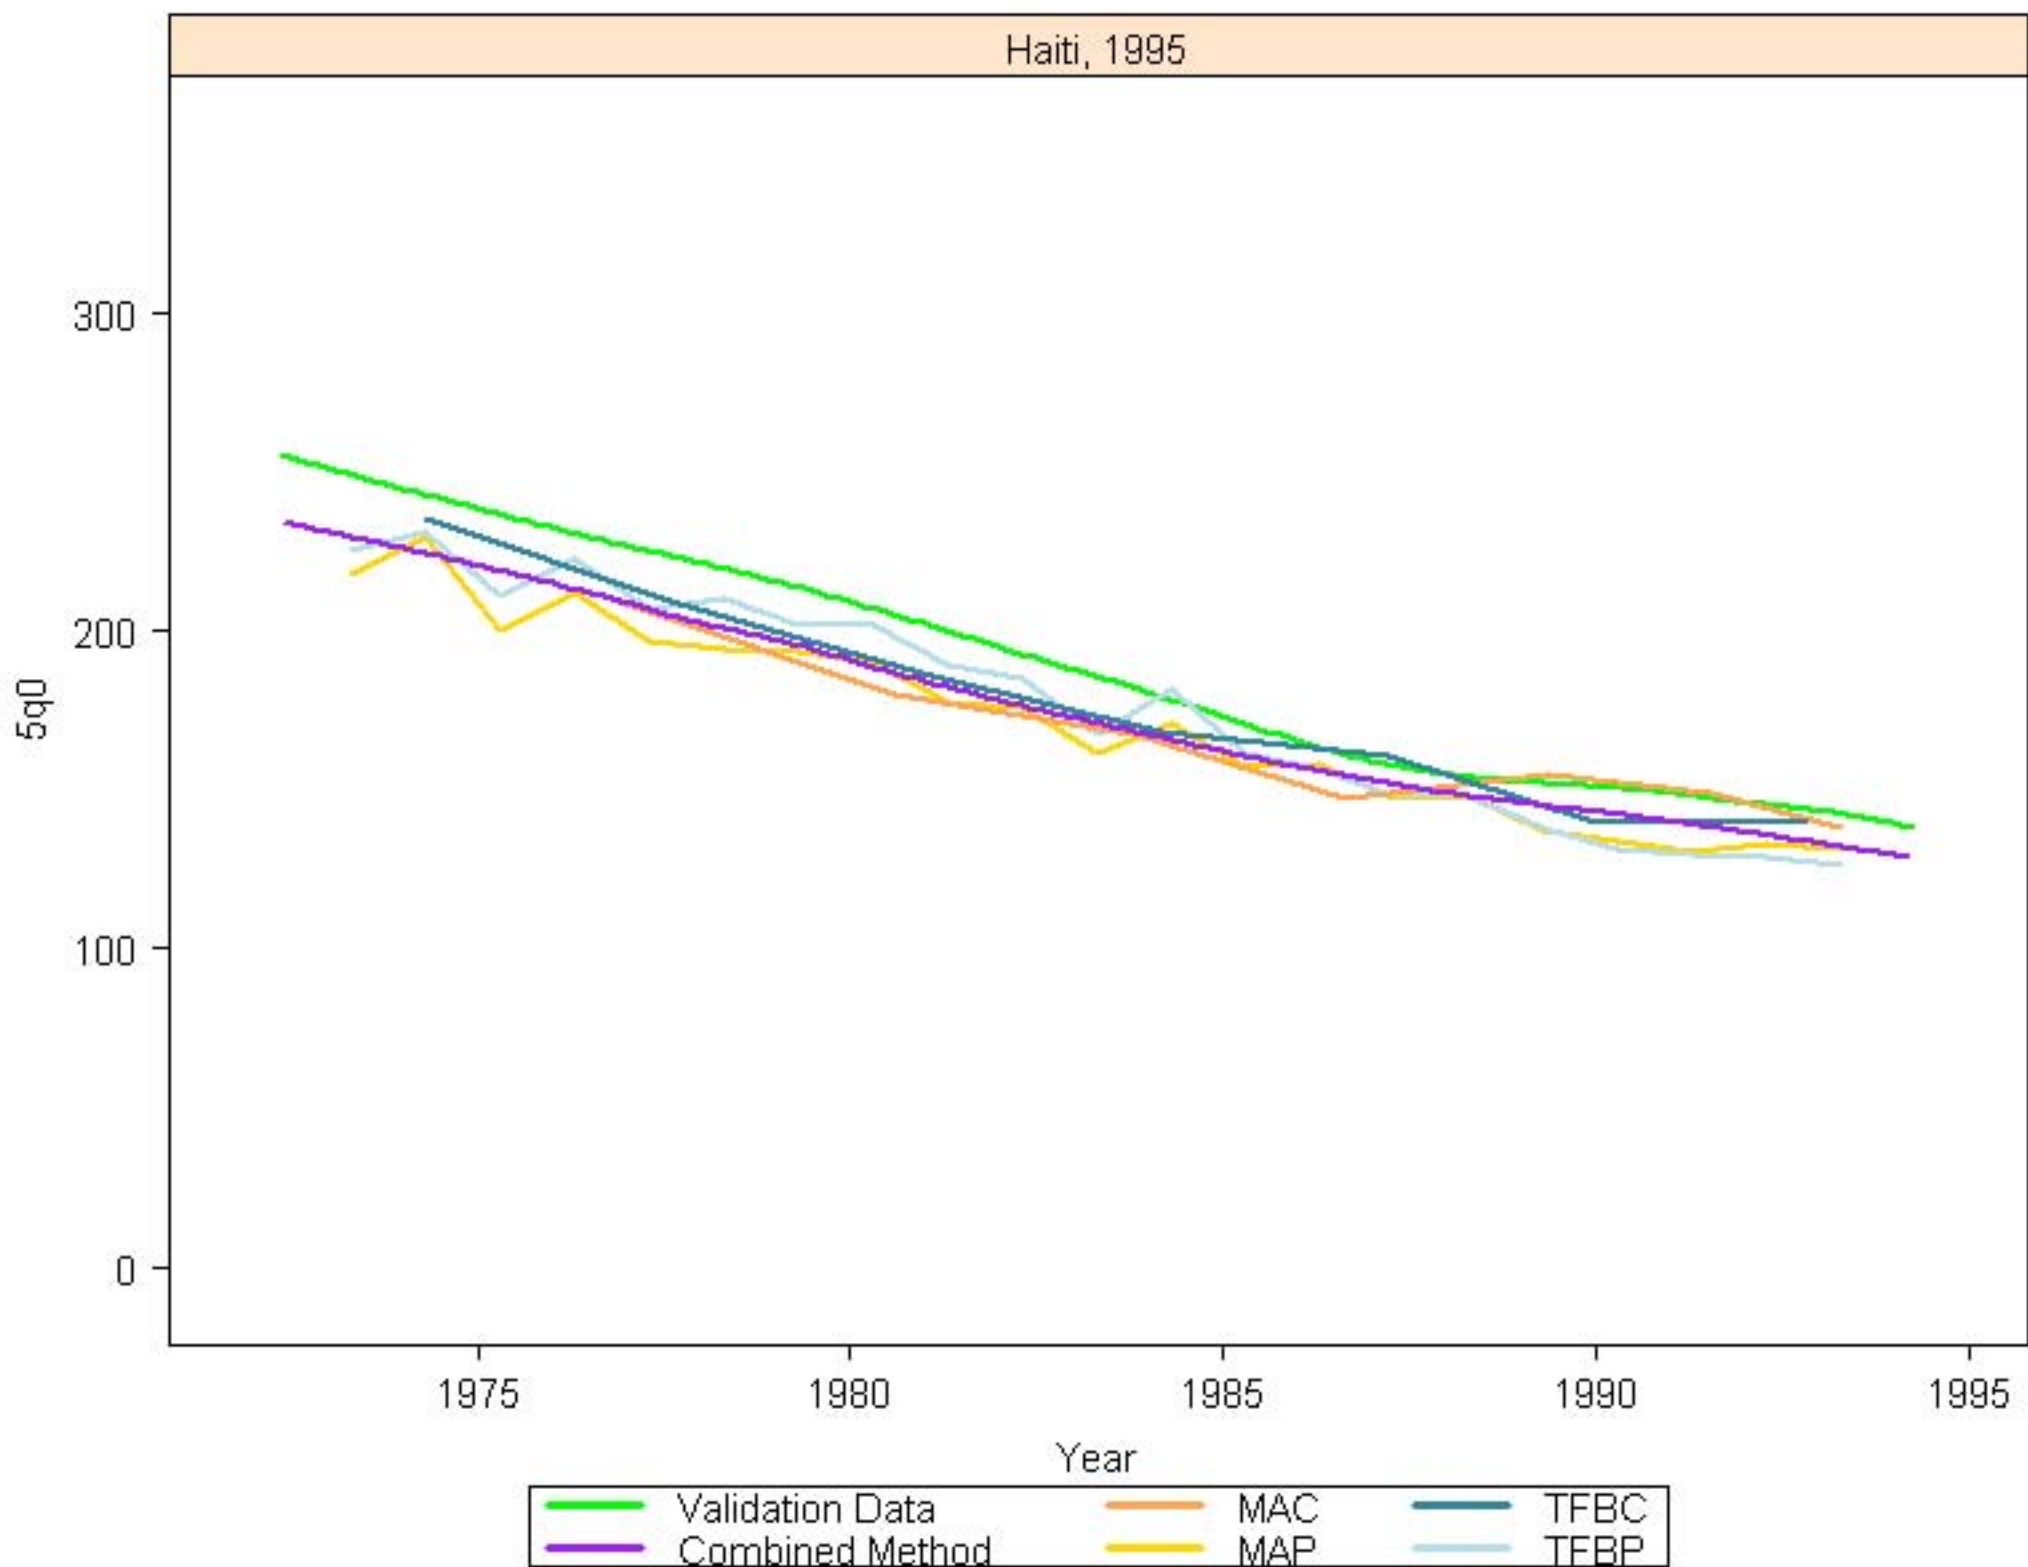

# Haiti, 2000

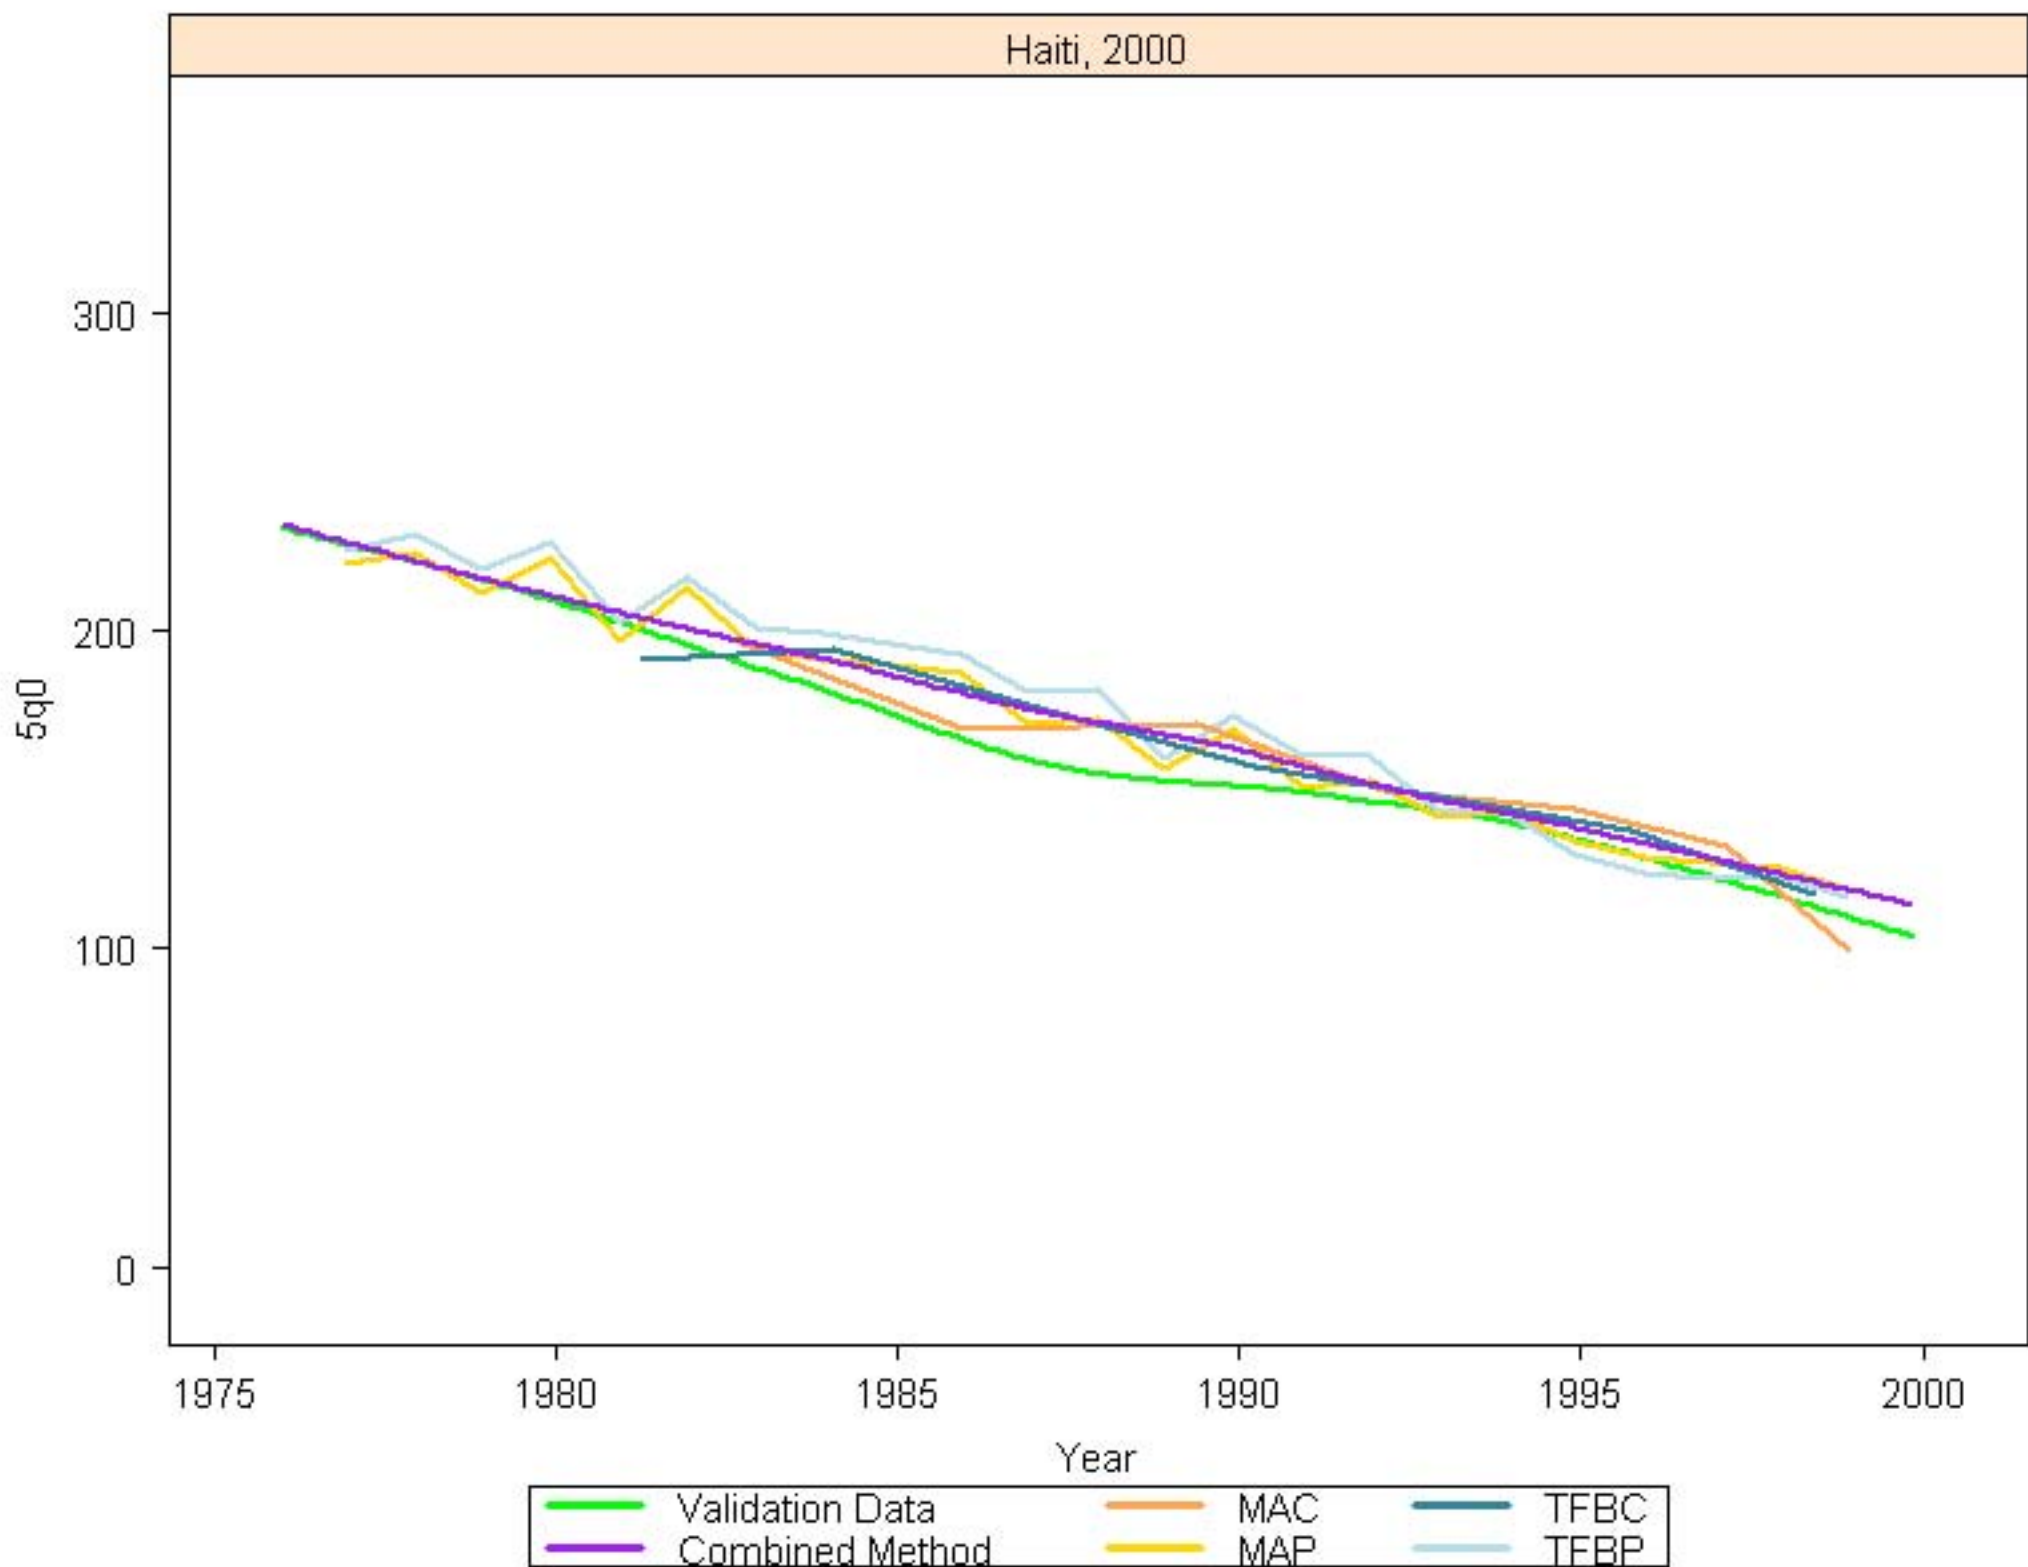

# Haiti, 2006

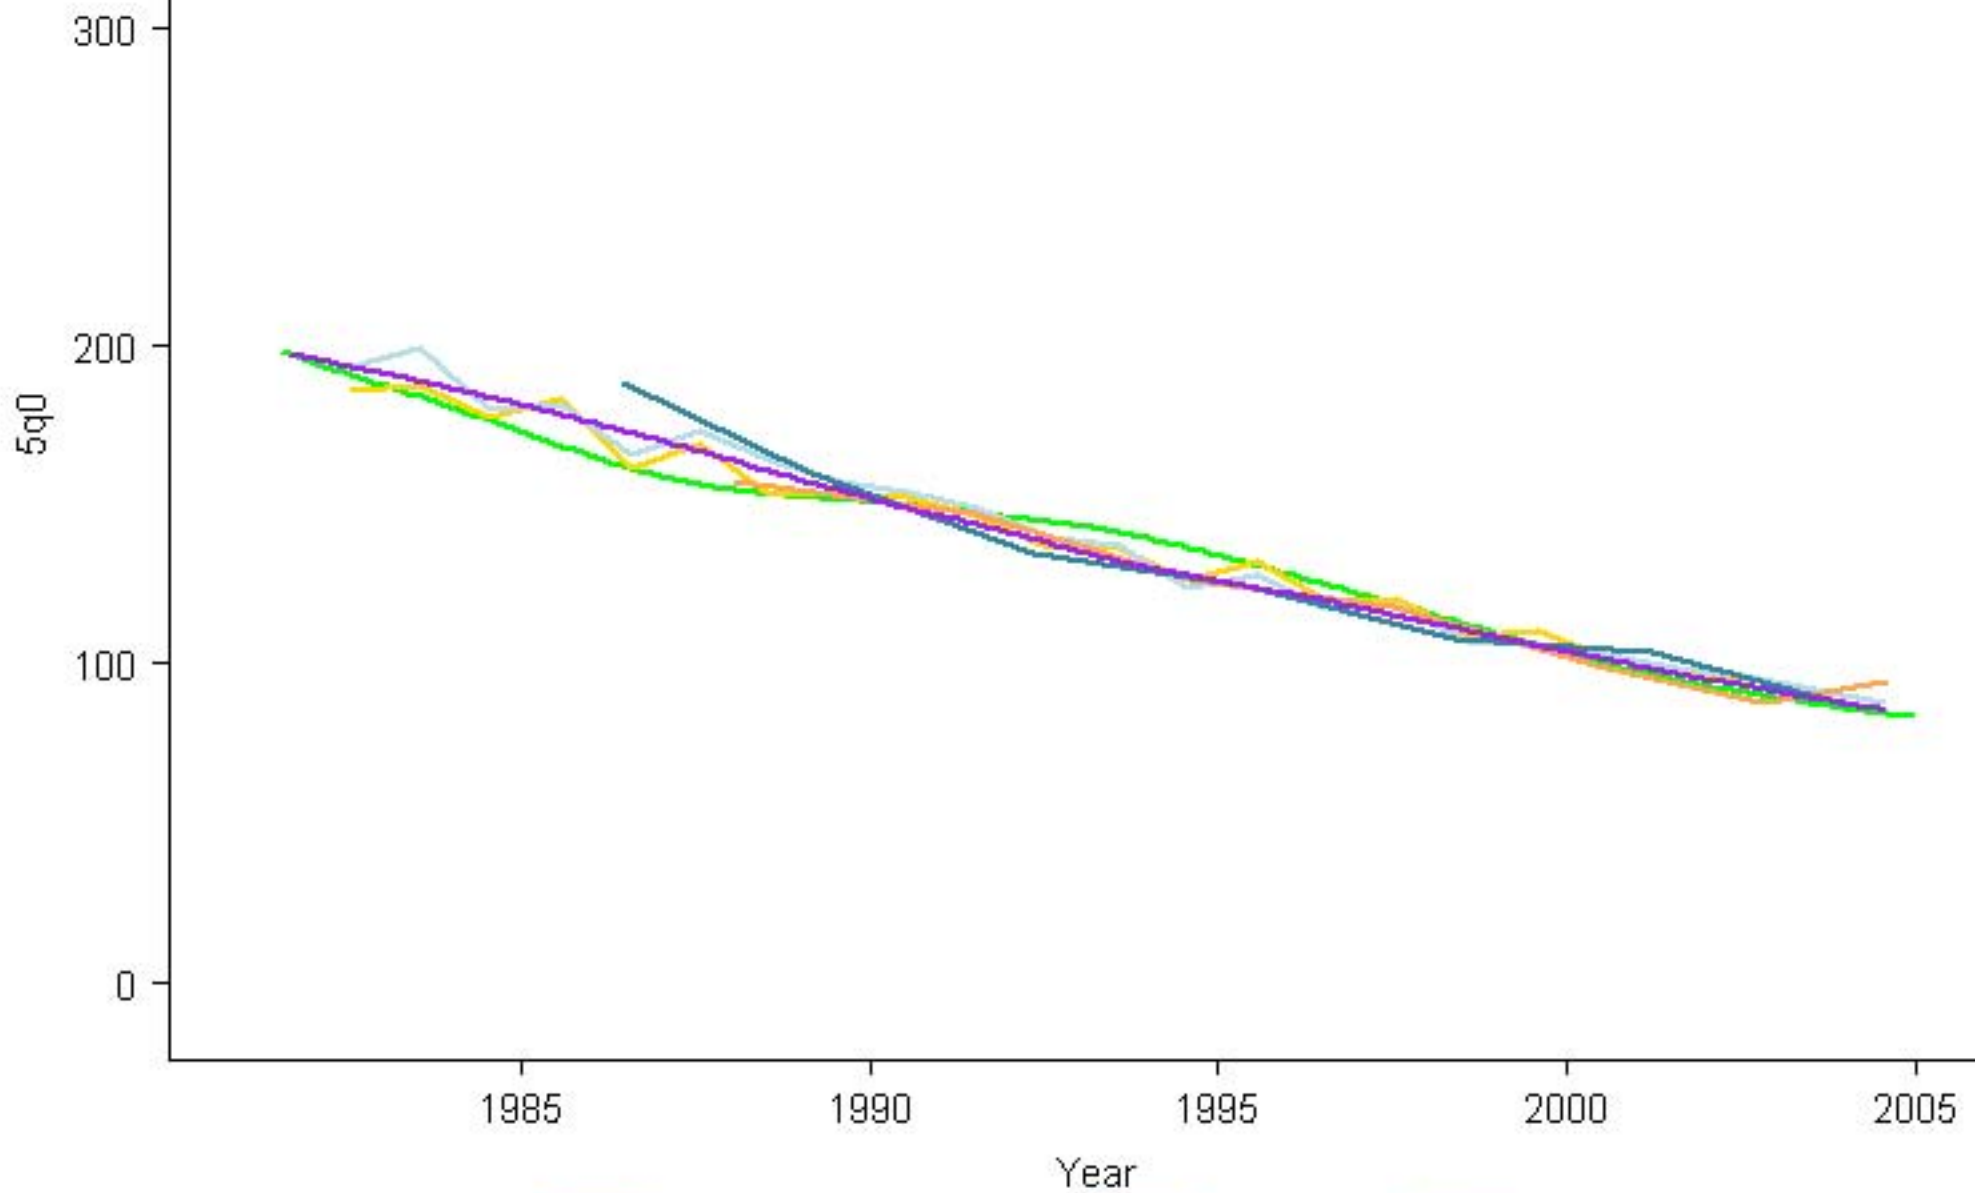

# Honduras, 2006

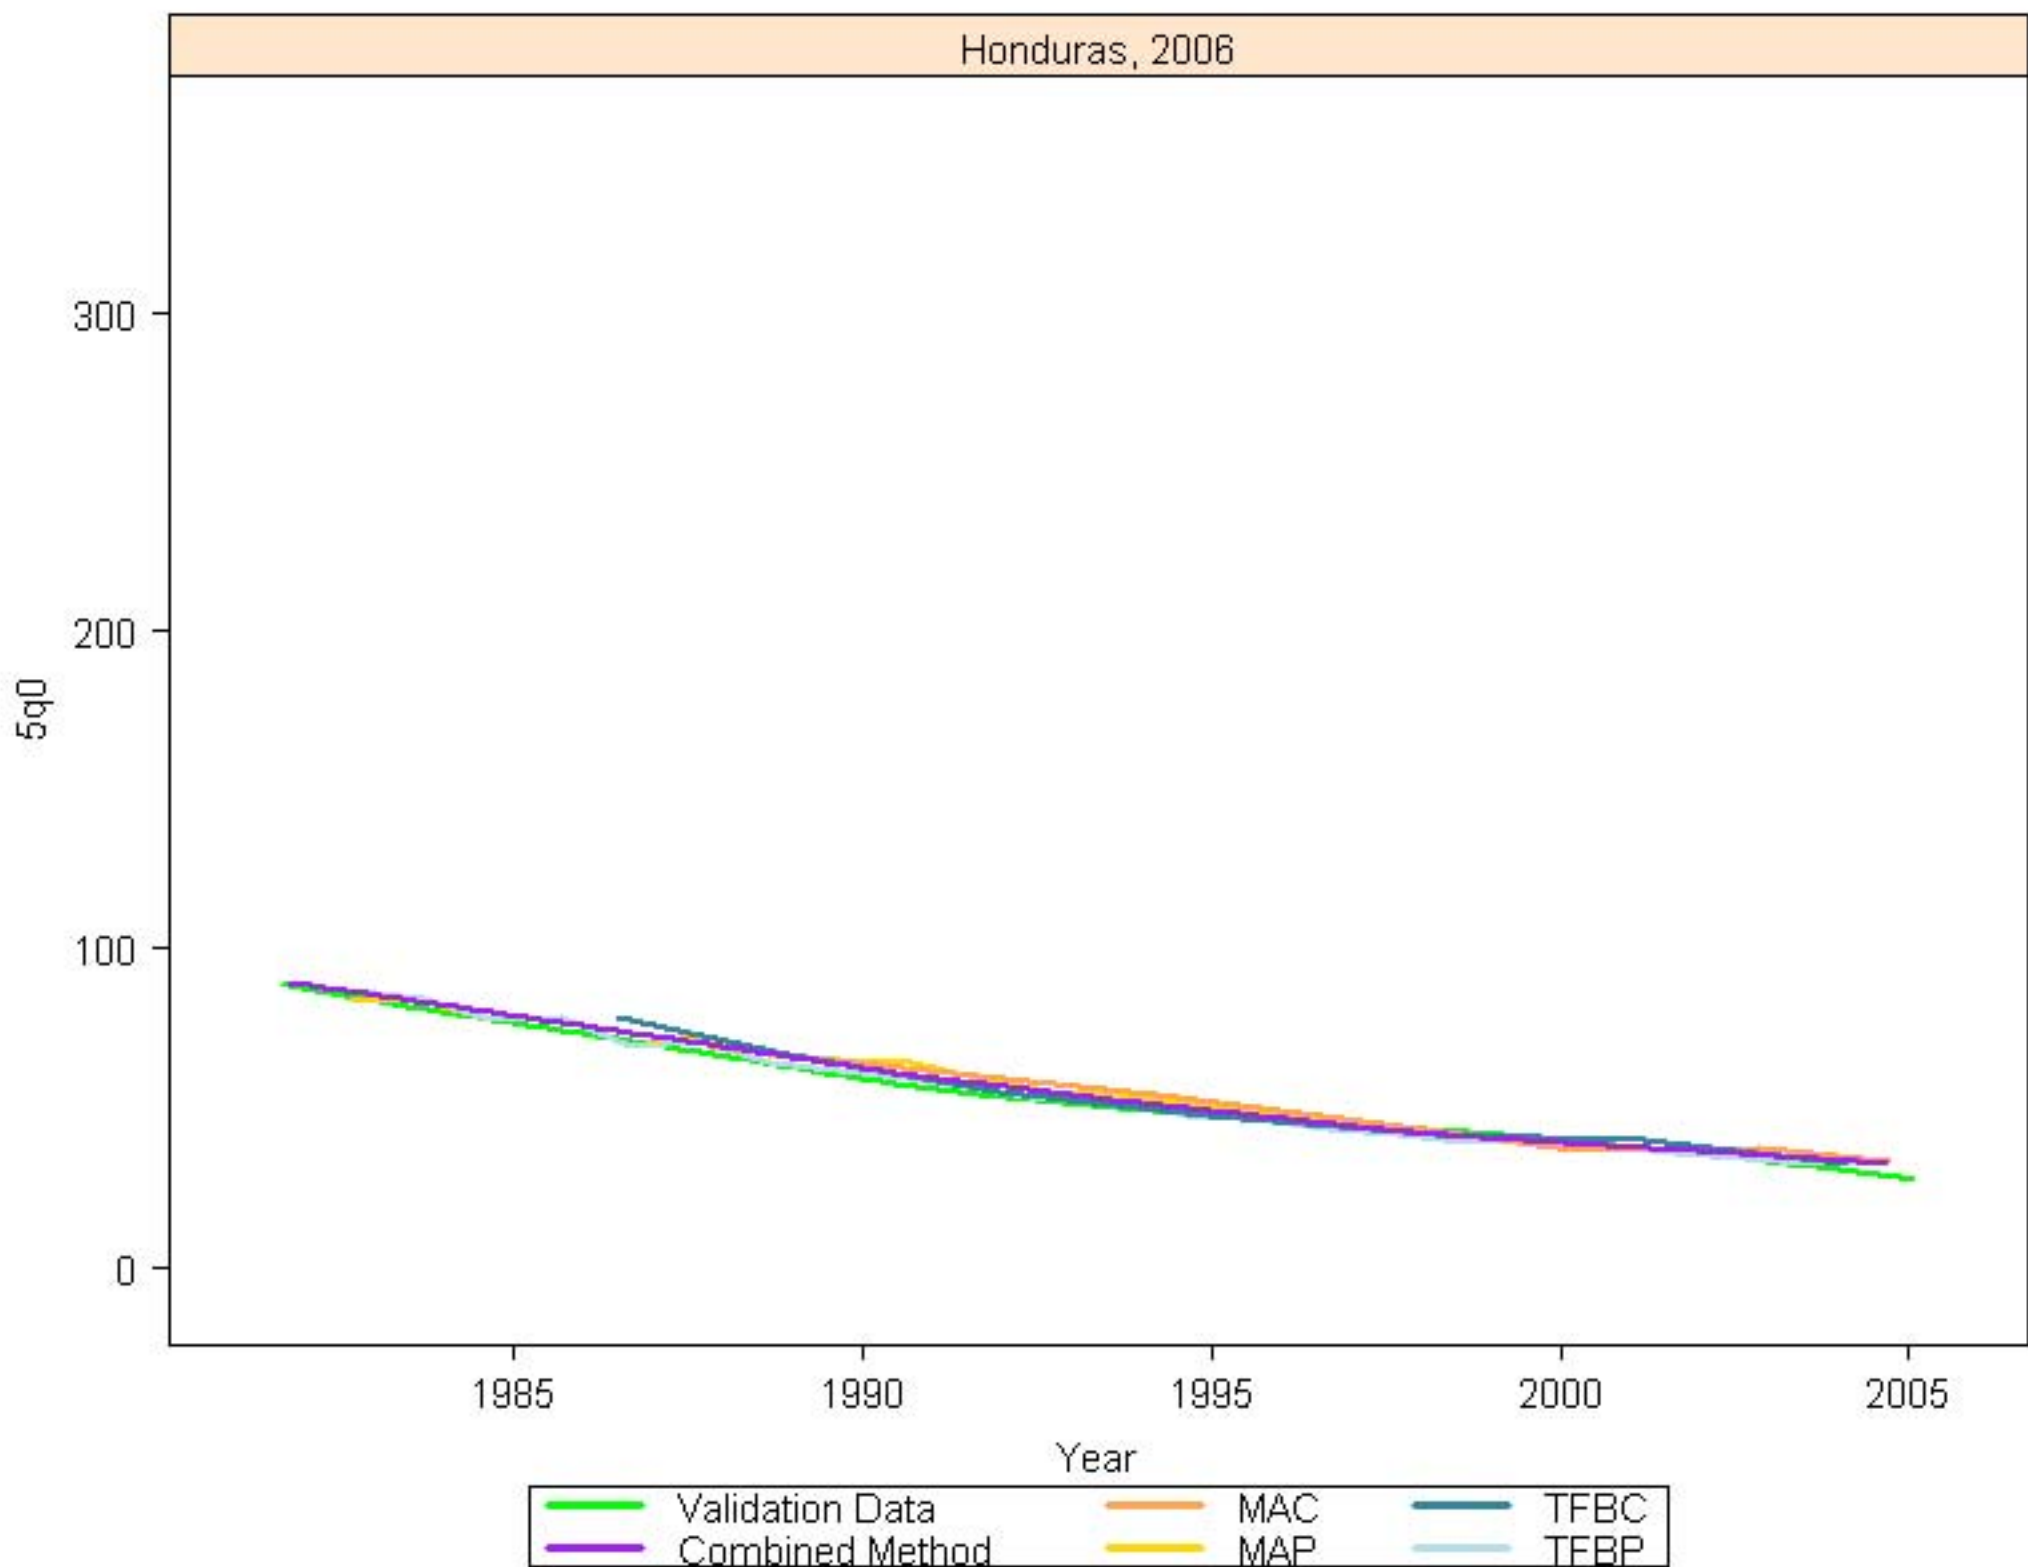

India, 1993

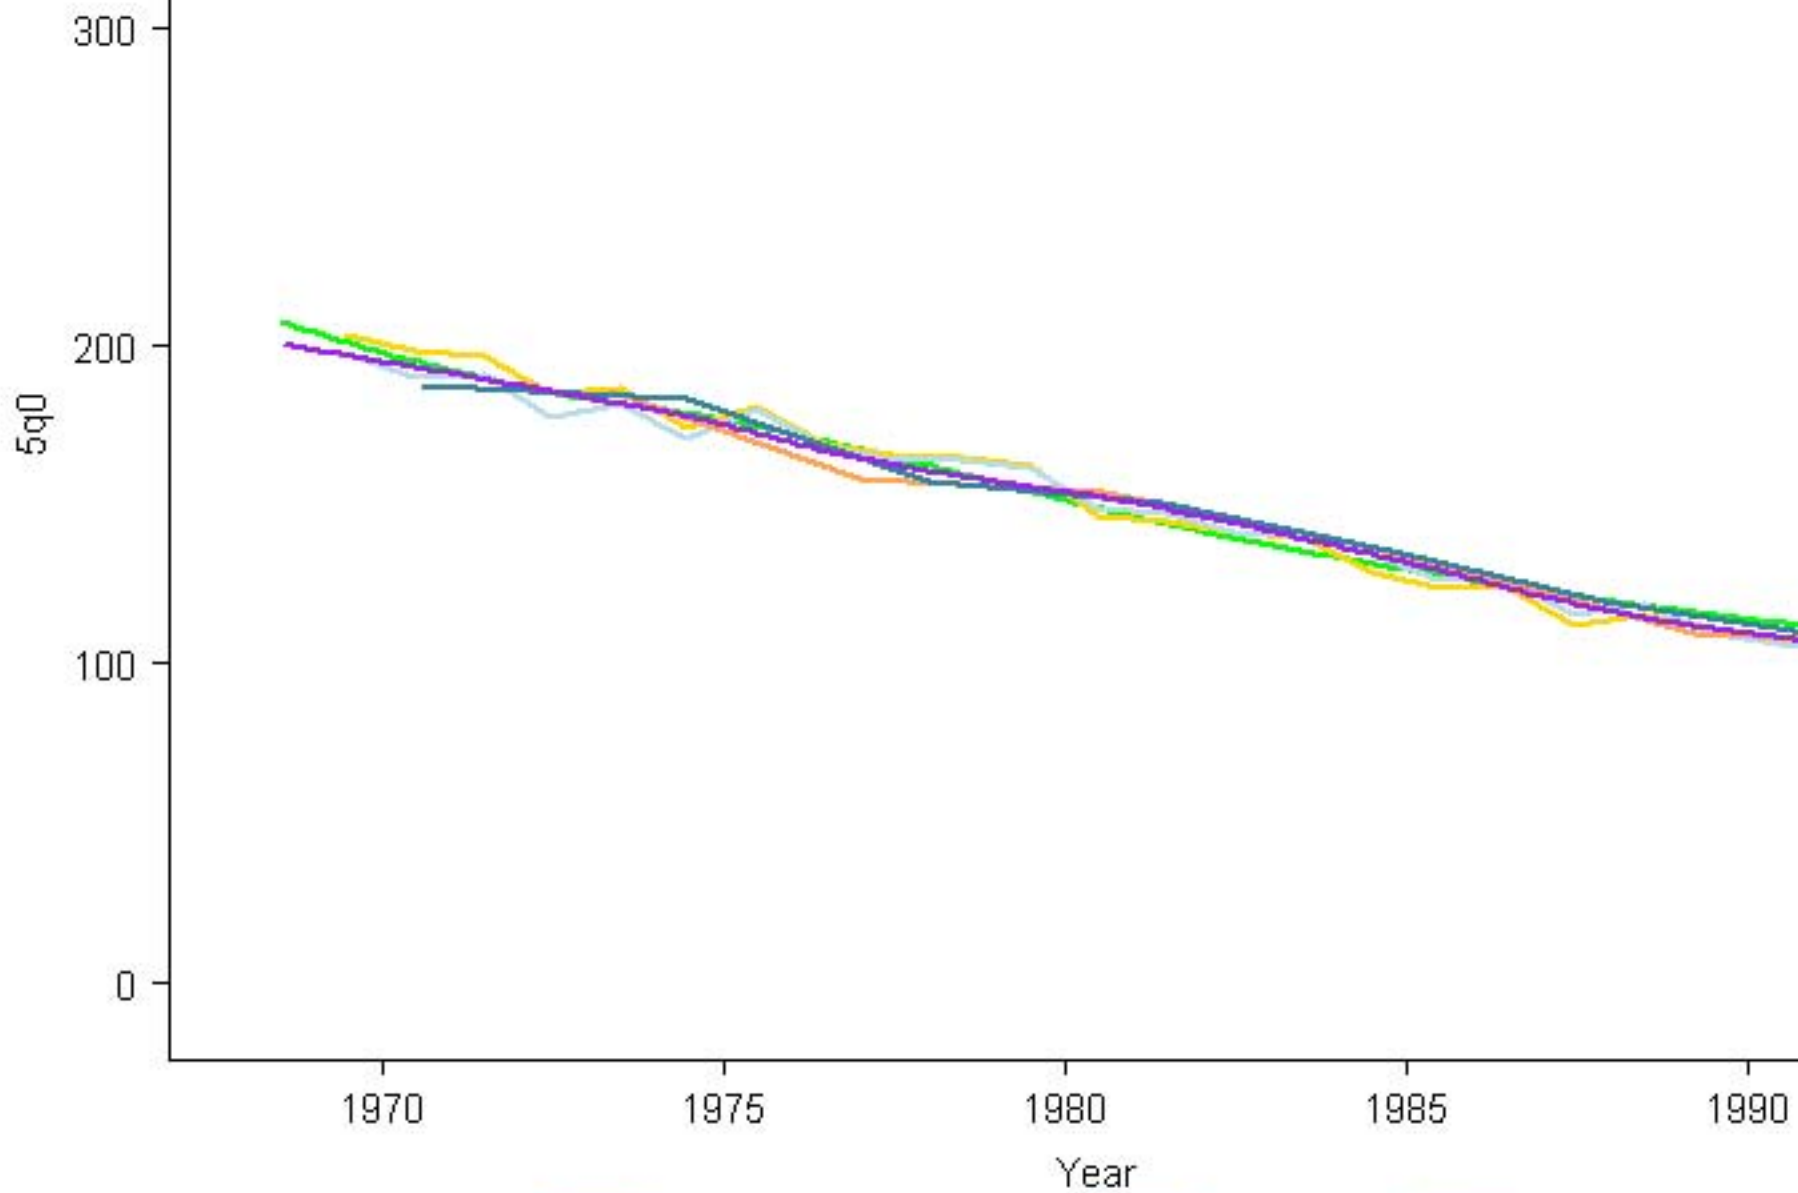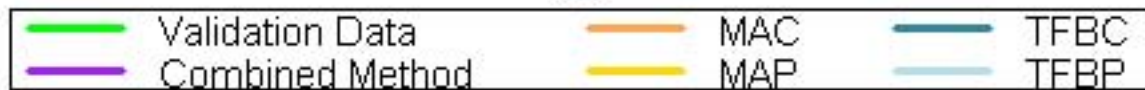

India, 1999

5q0

300  
200  
100  
0

1975 1980 1985 1990 1995

Year

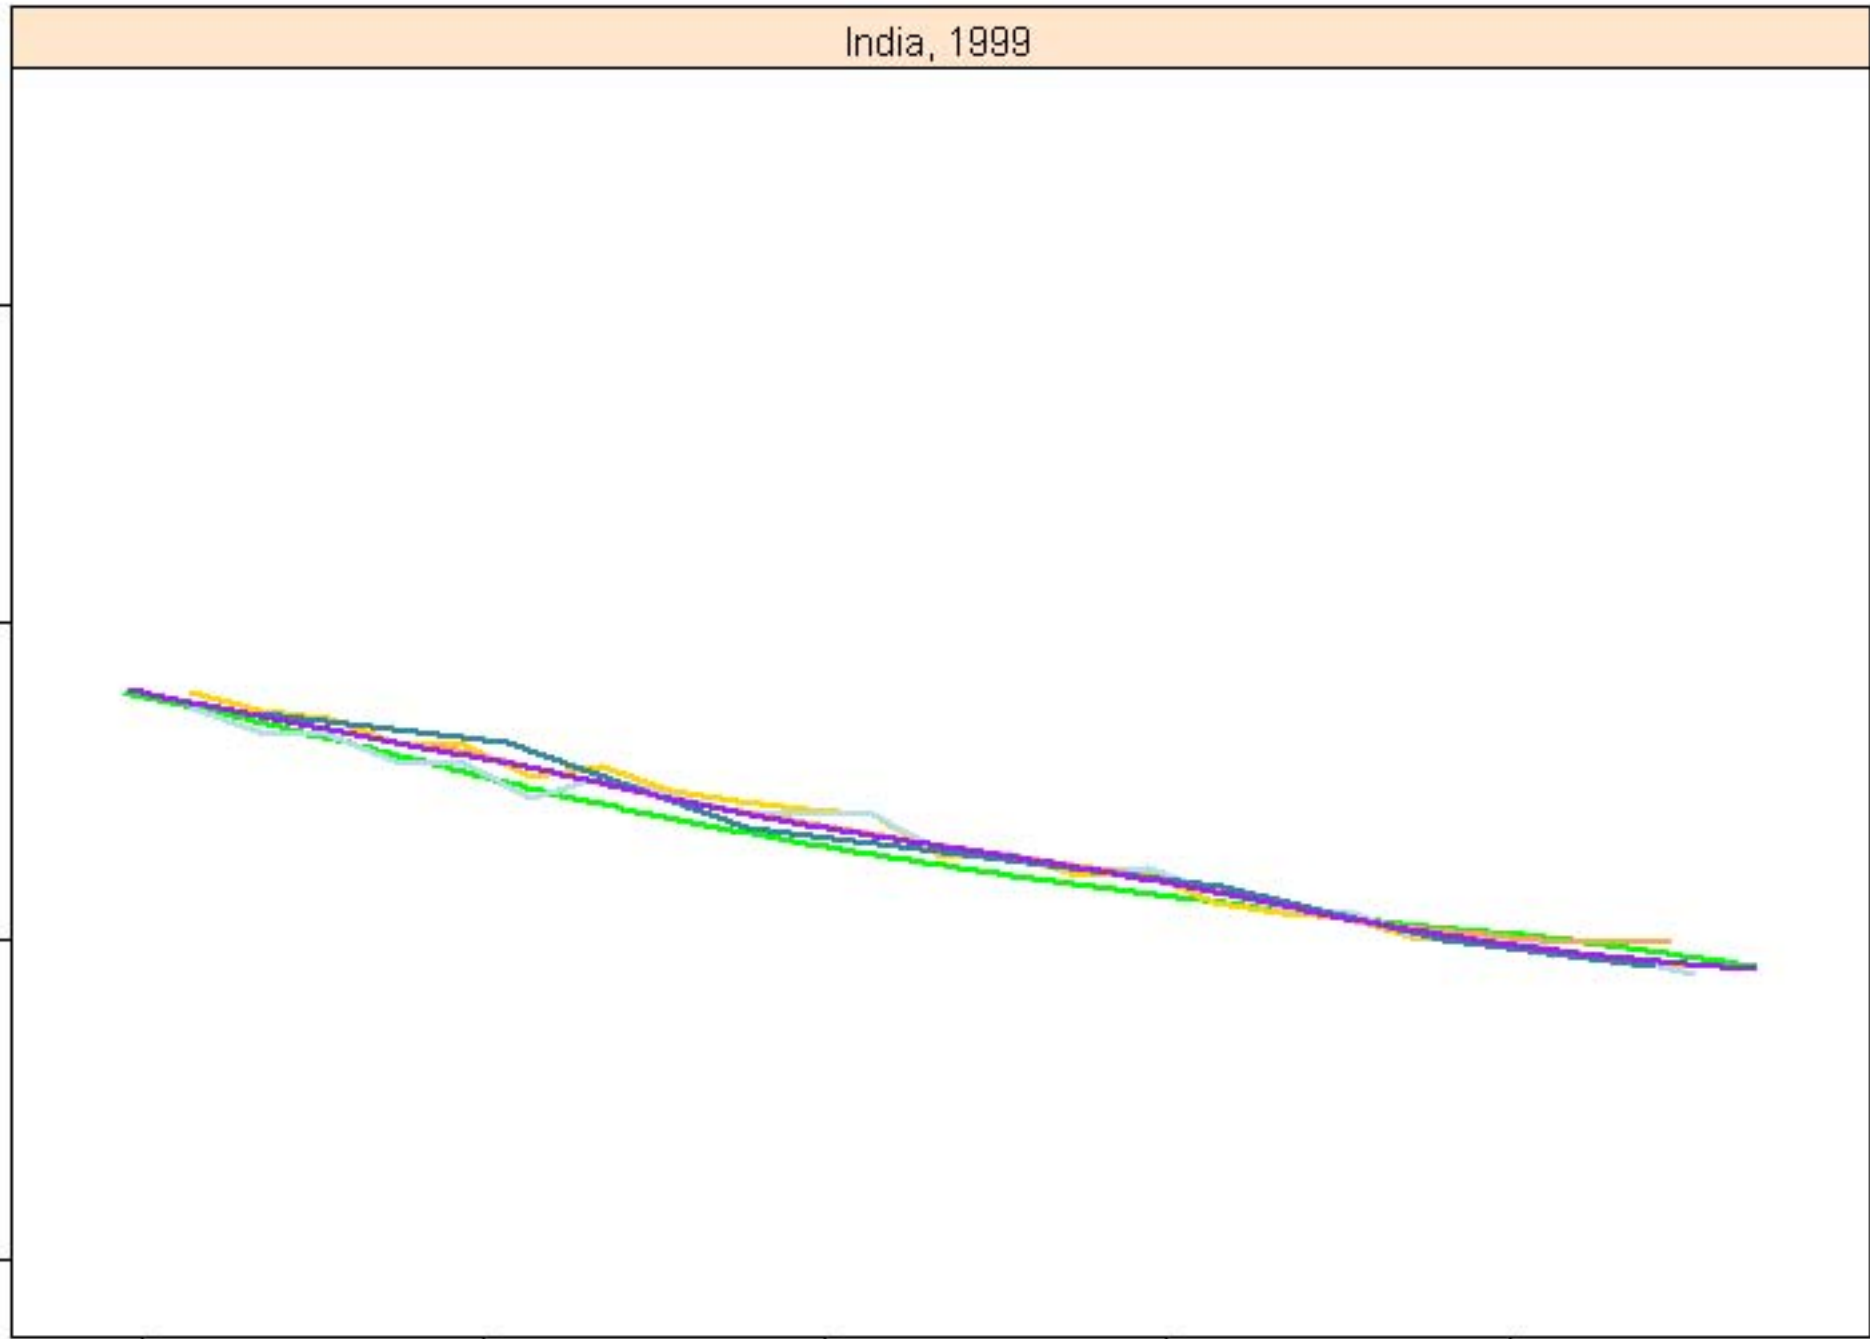

India, 2006

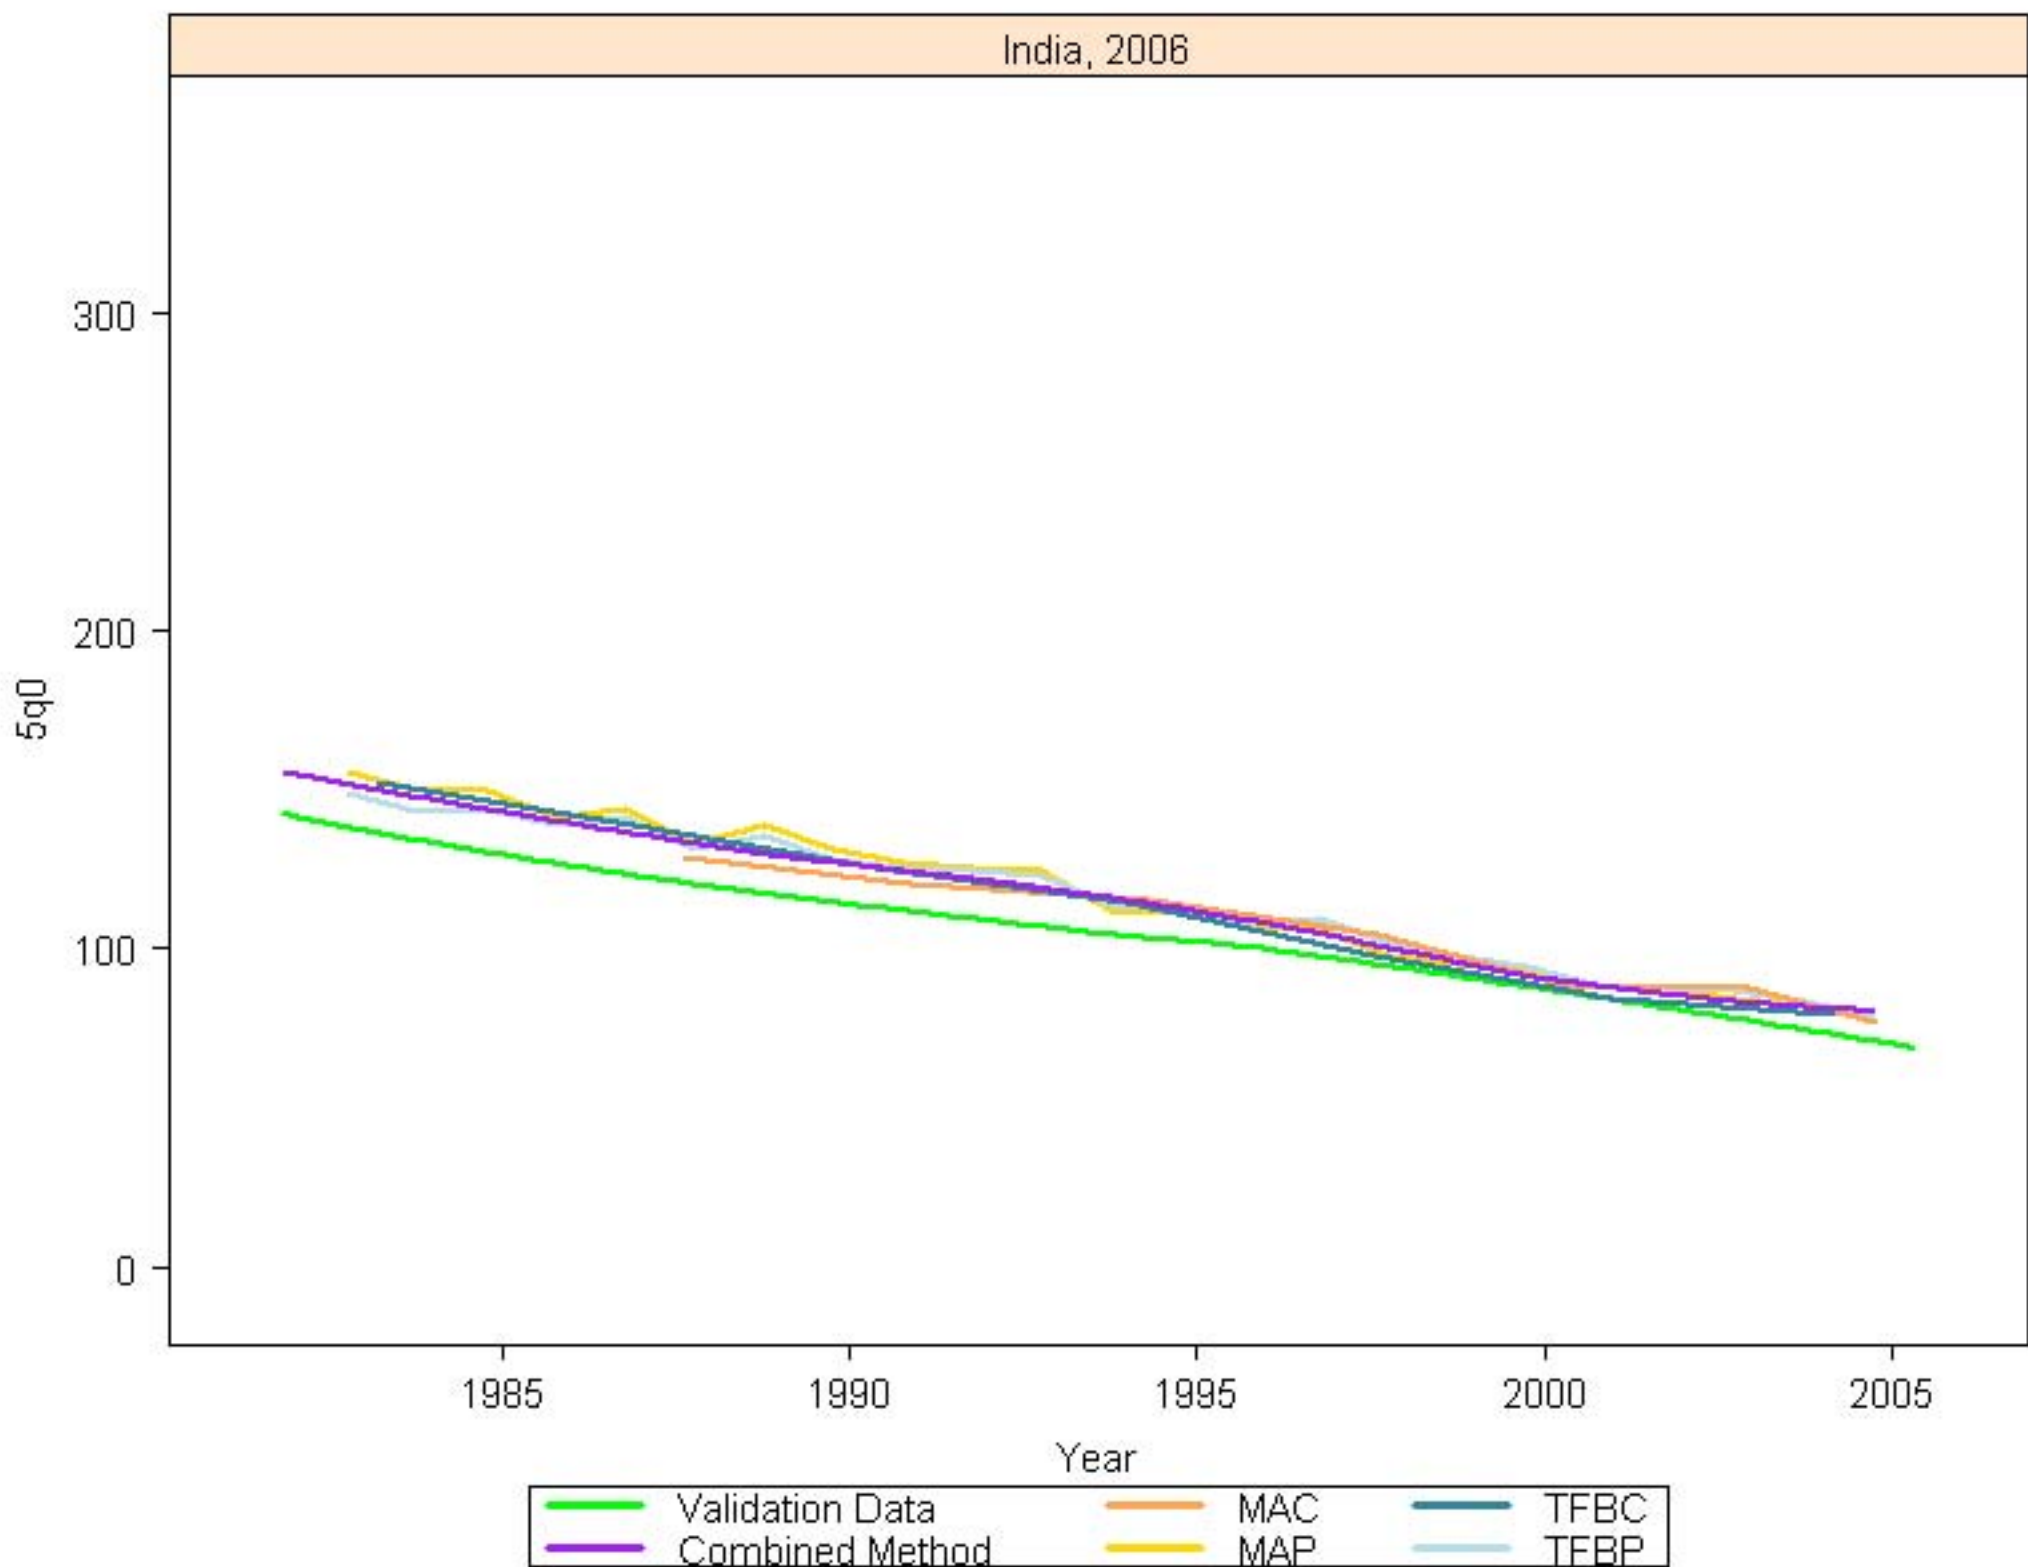

Validation Data      MAC      TFBC  
Combined Method      MAP      TFBP

Indonesia, 1988

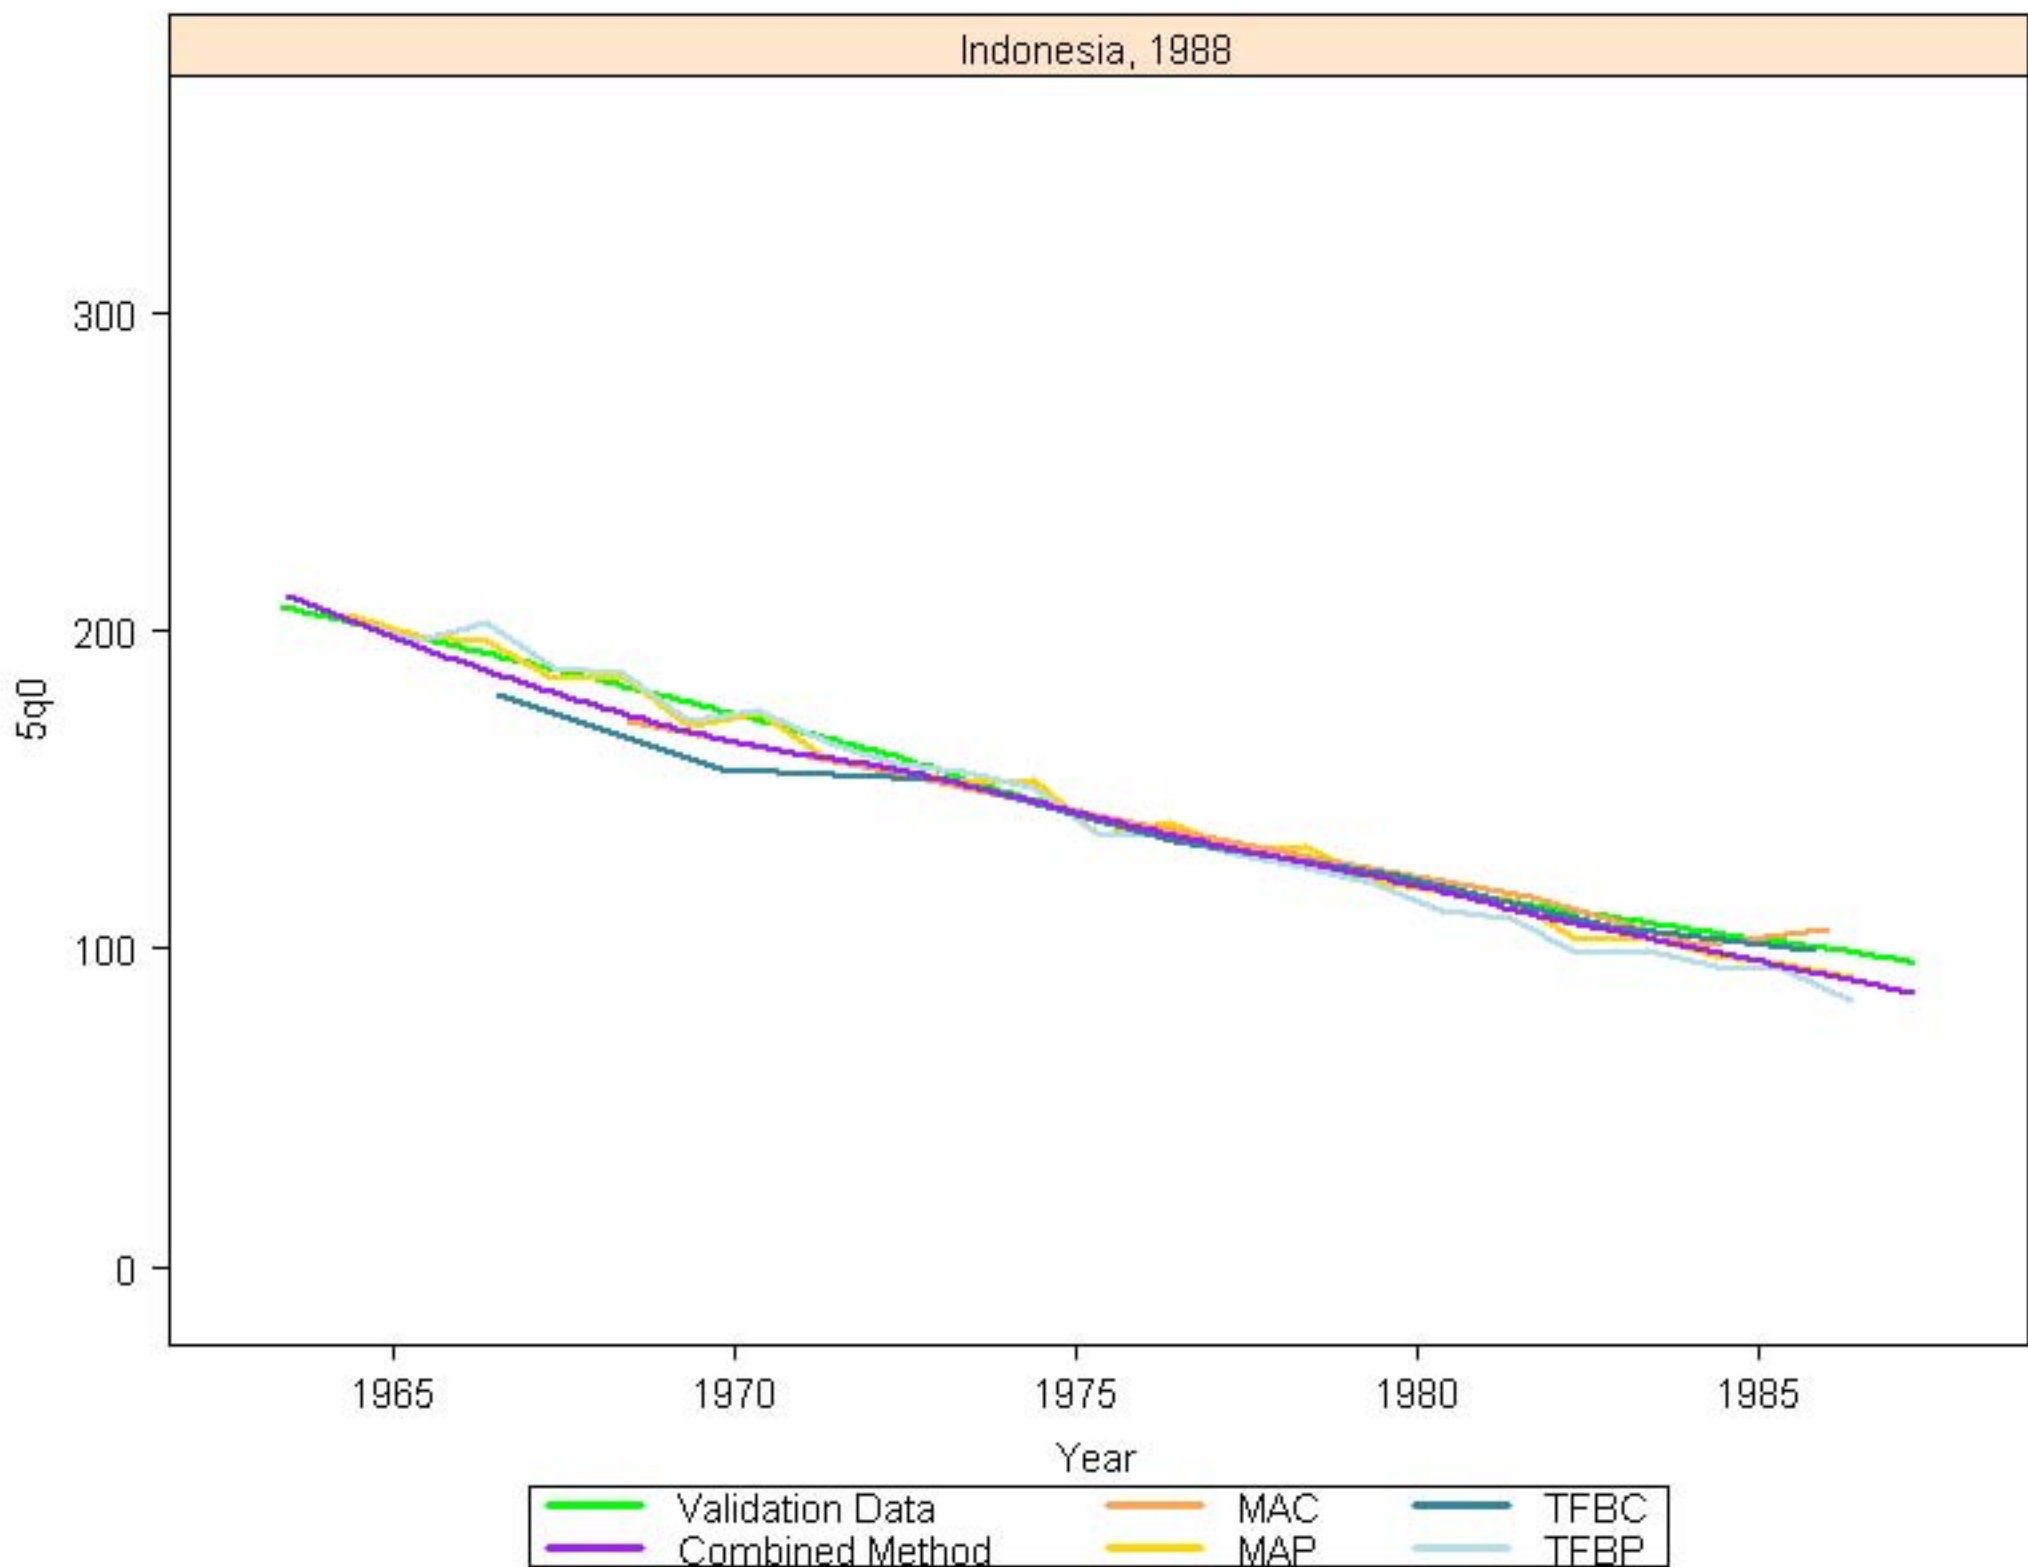



Indonesia, 1992

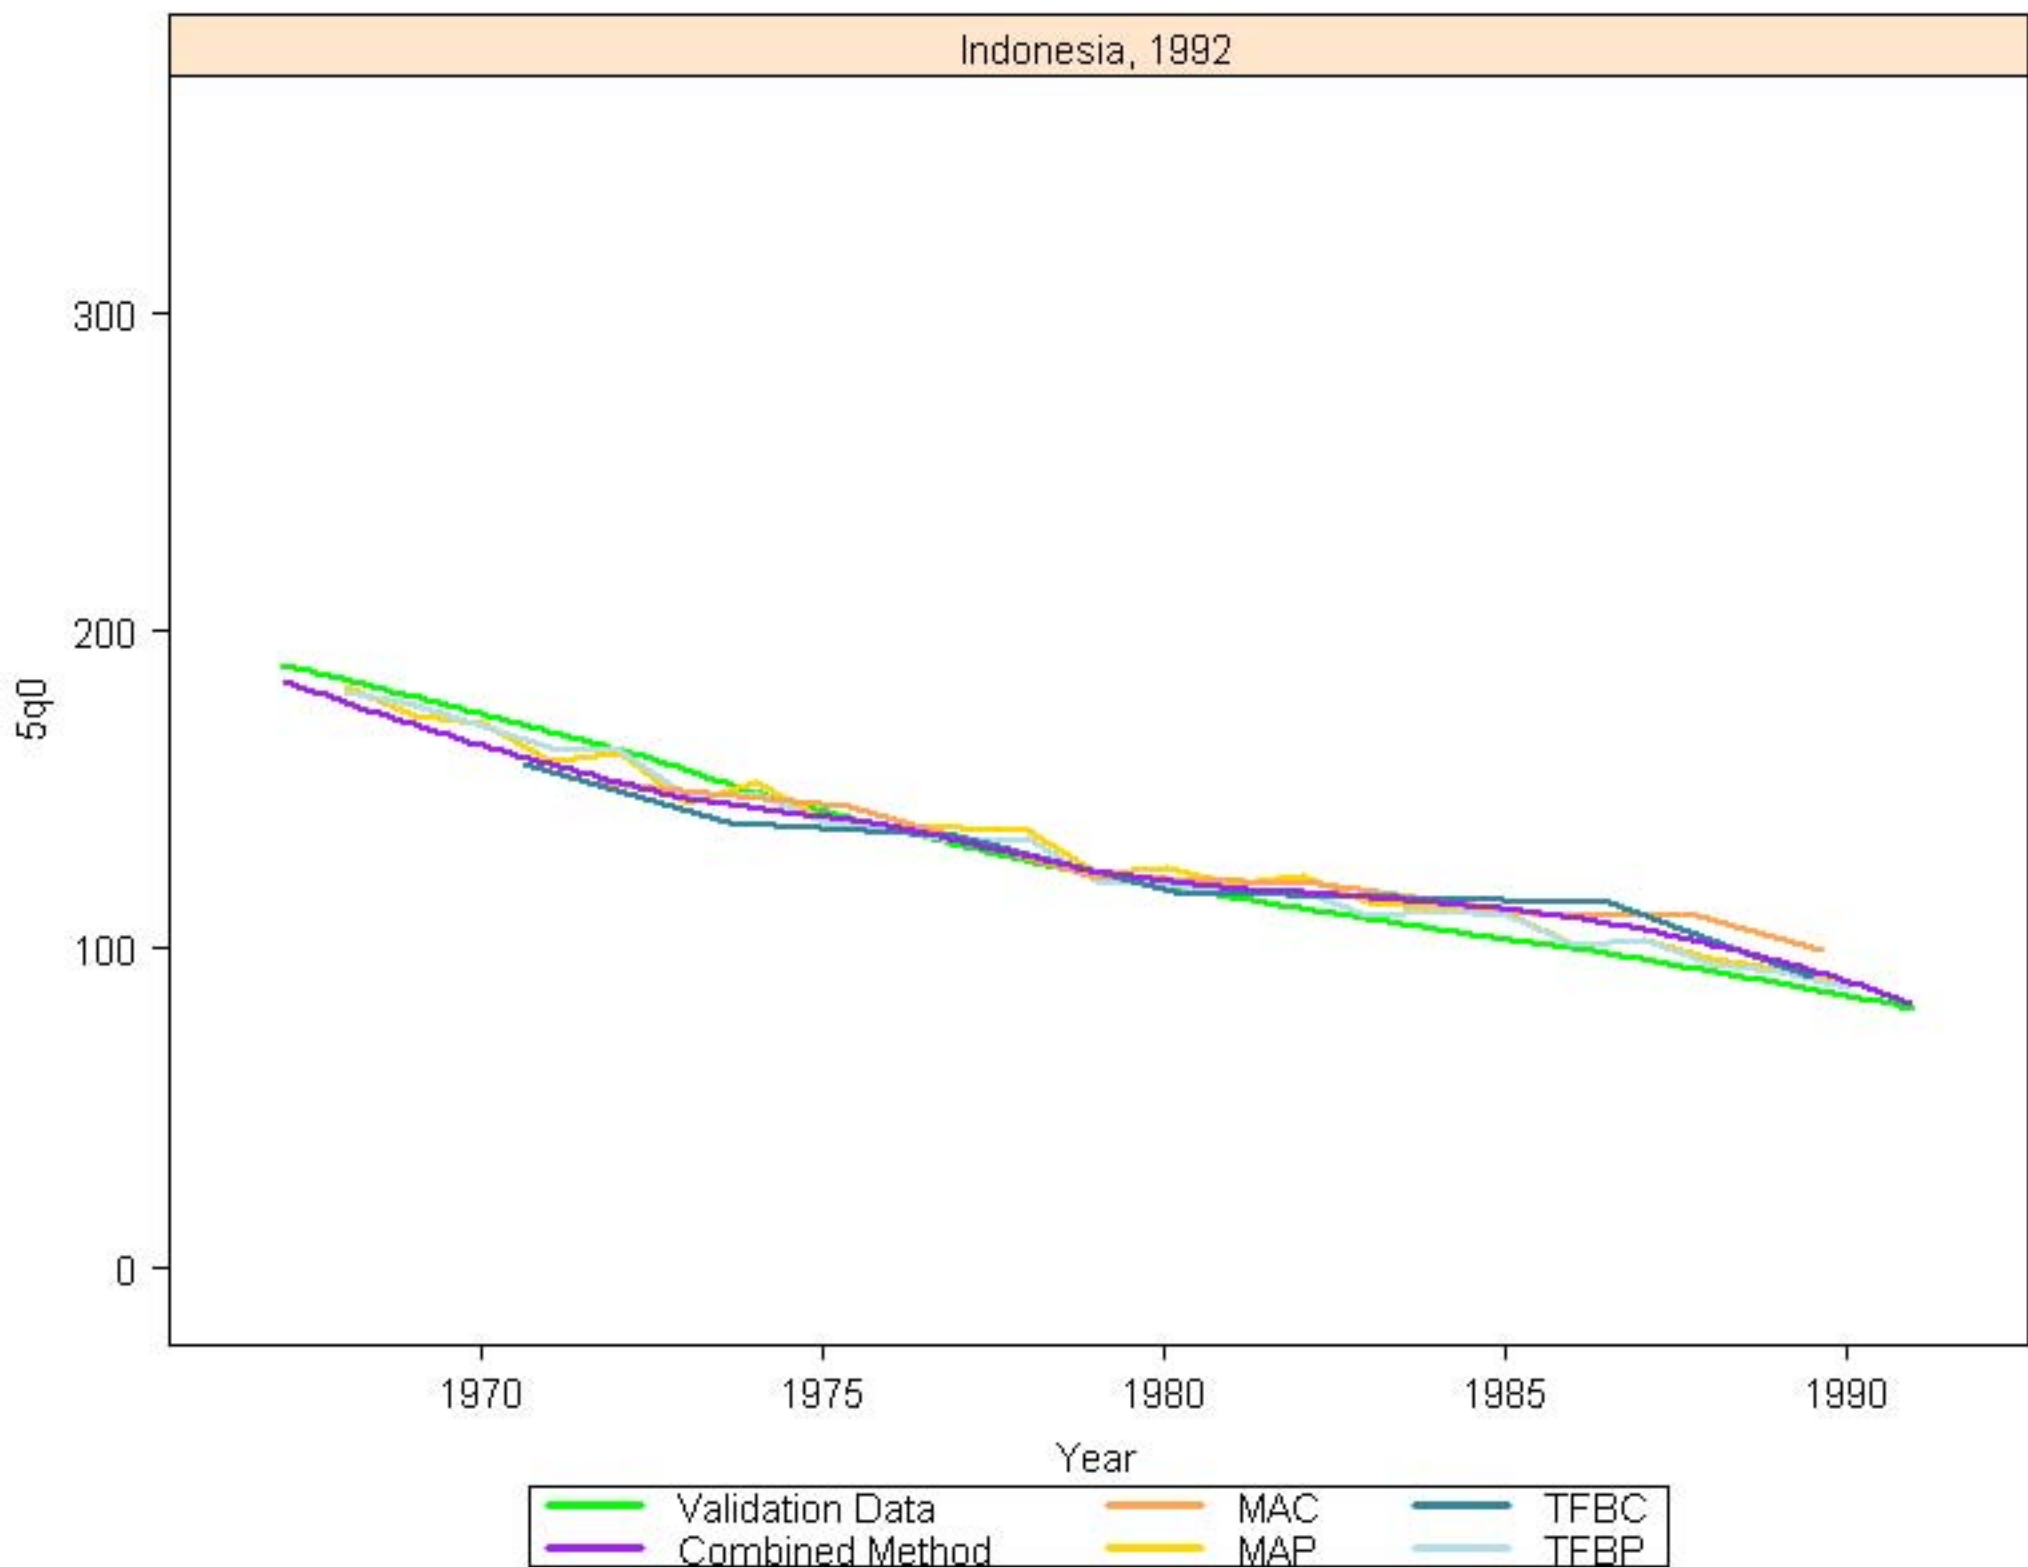

Indonesia, 1995

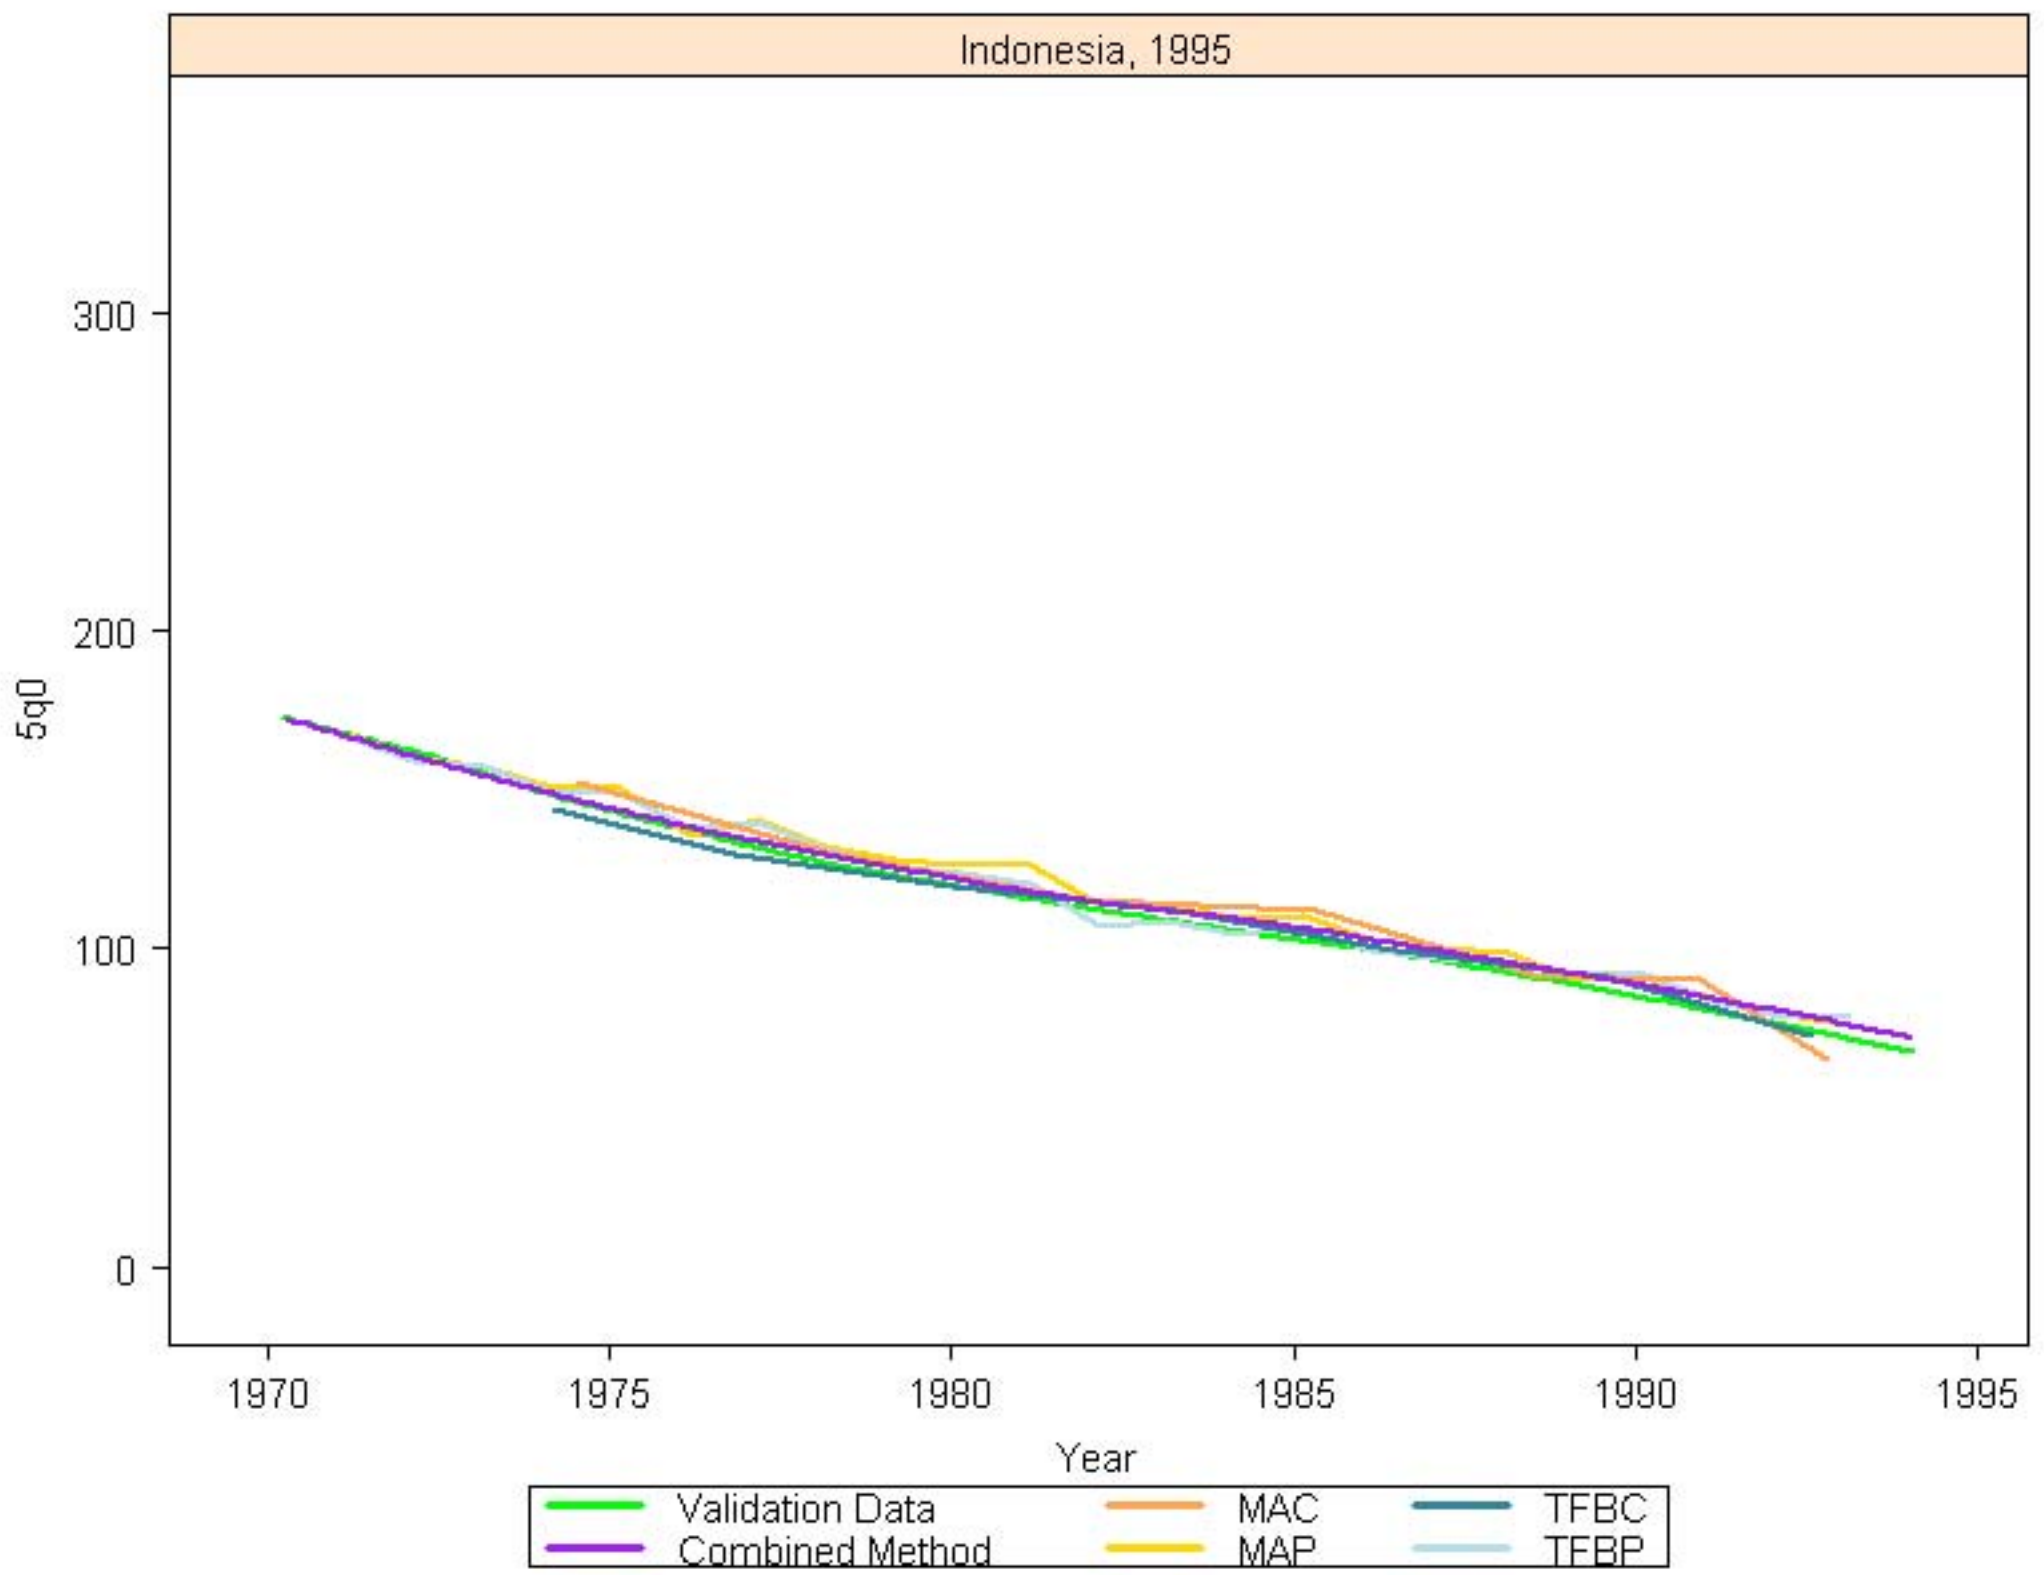

Indonesia, 1998

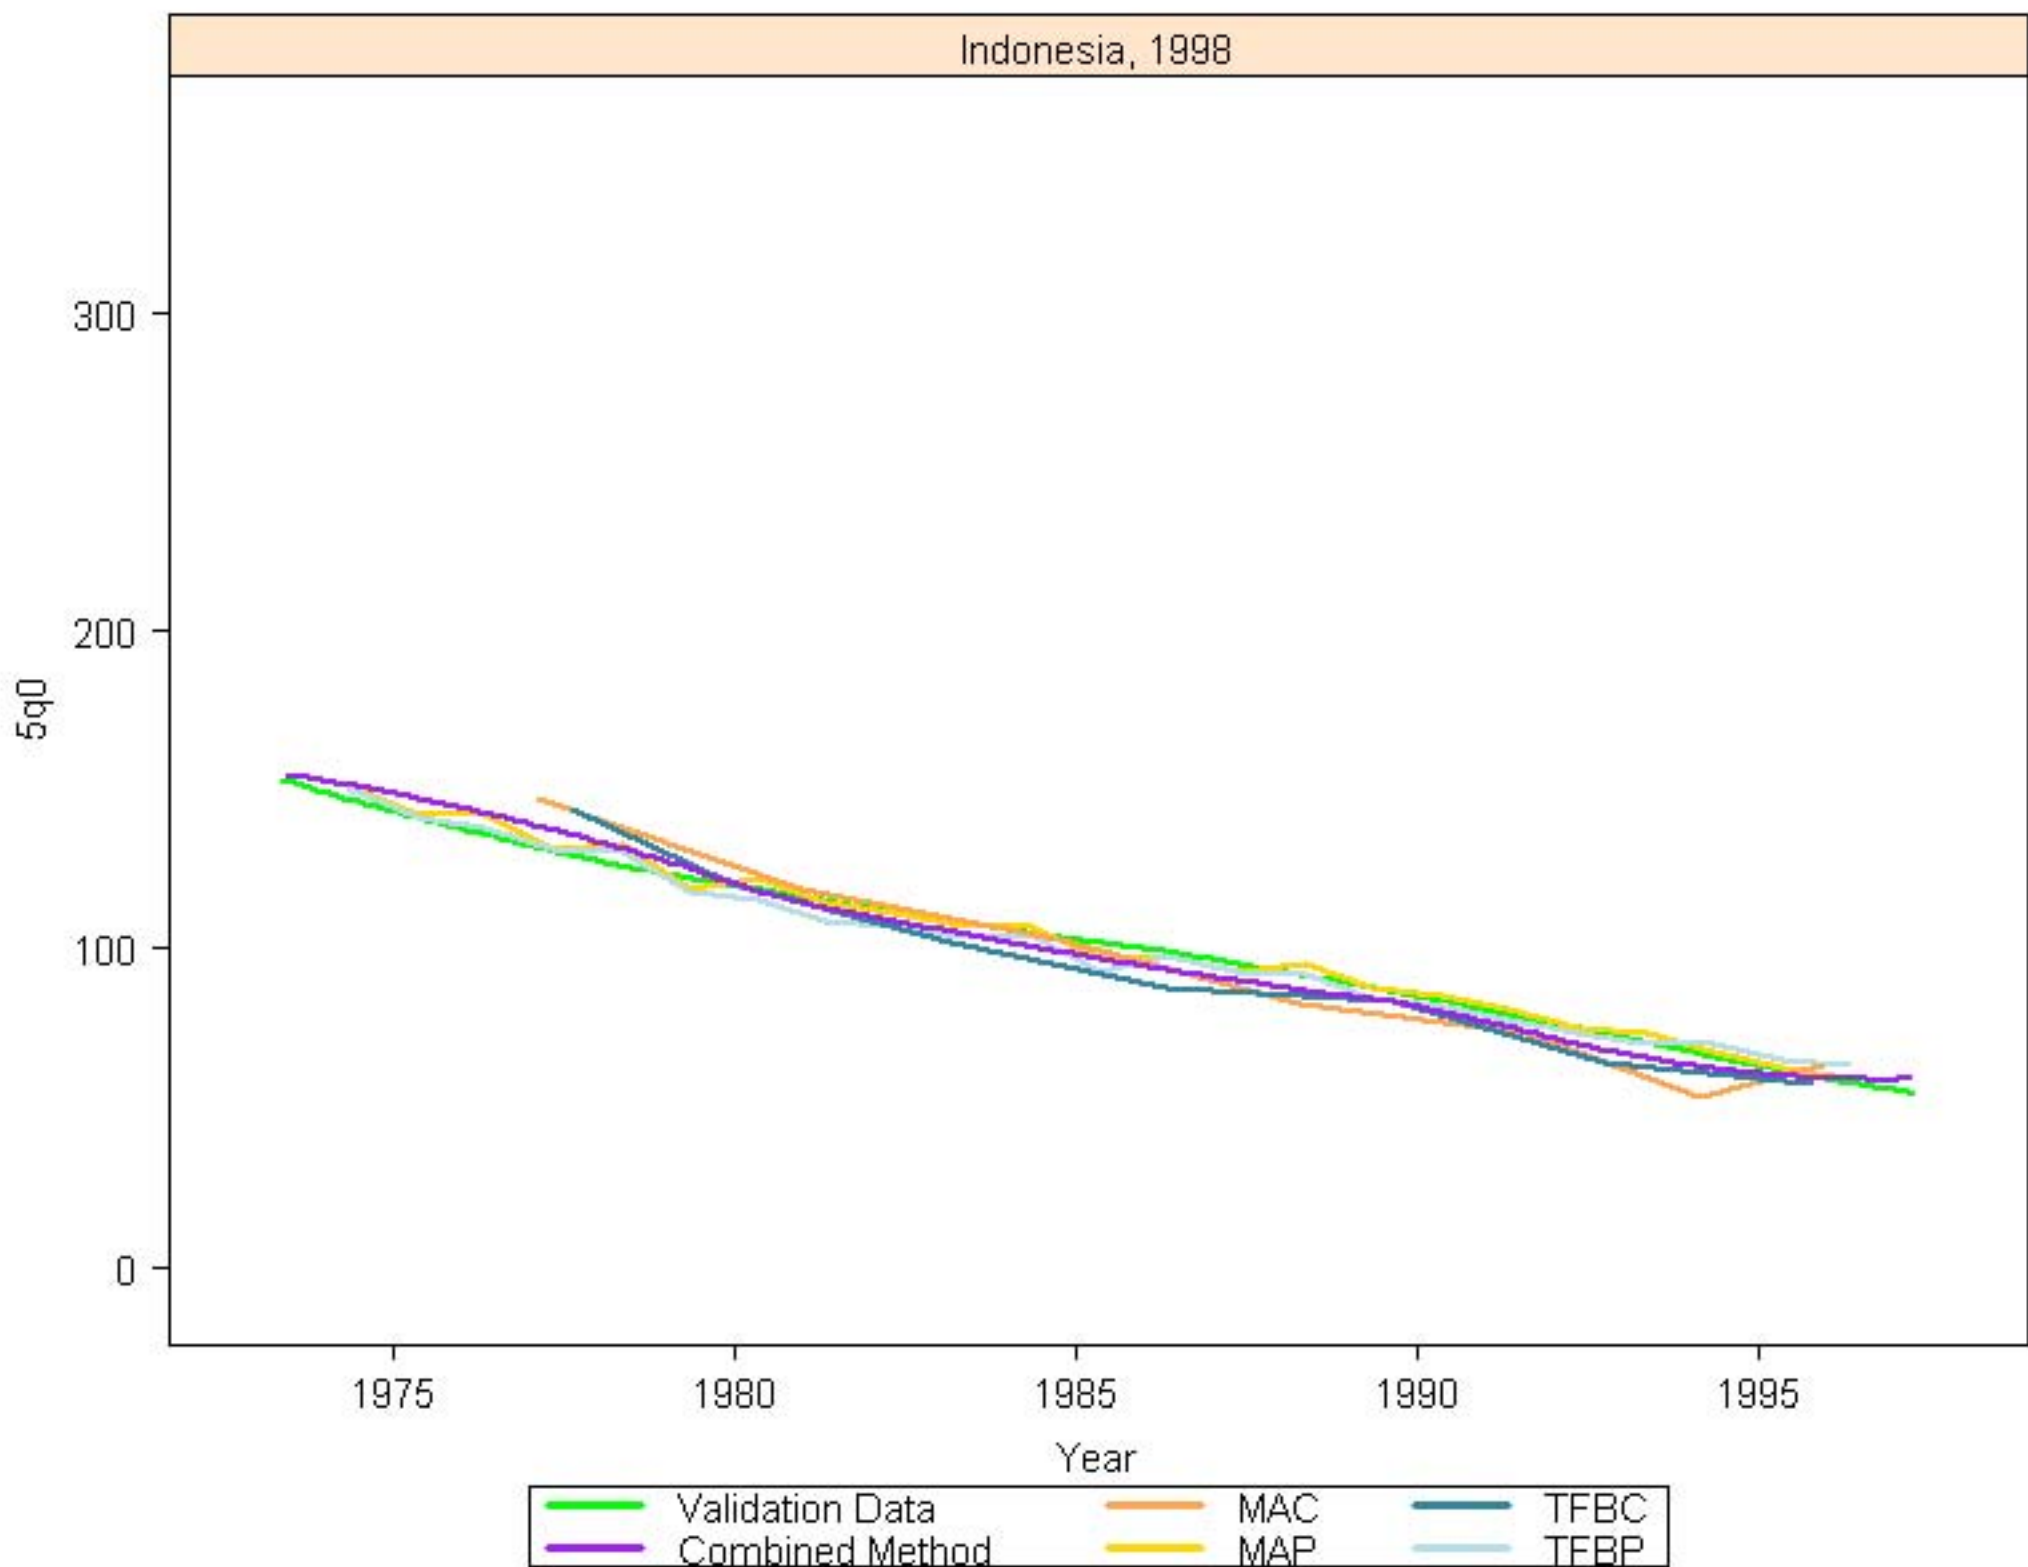

Indonesia, 2003

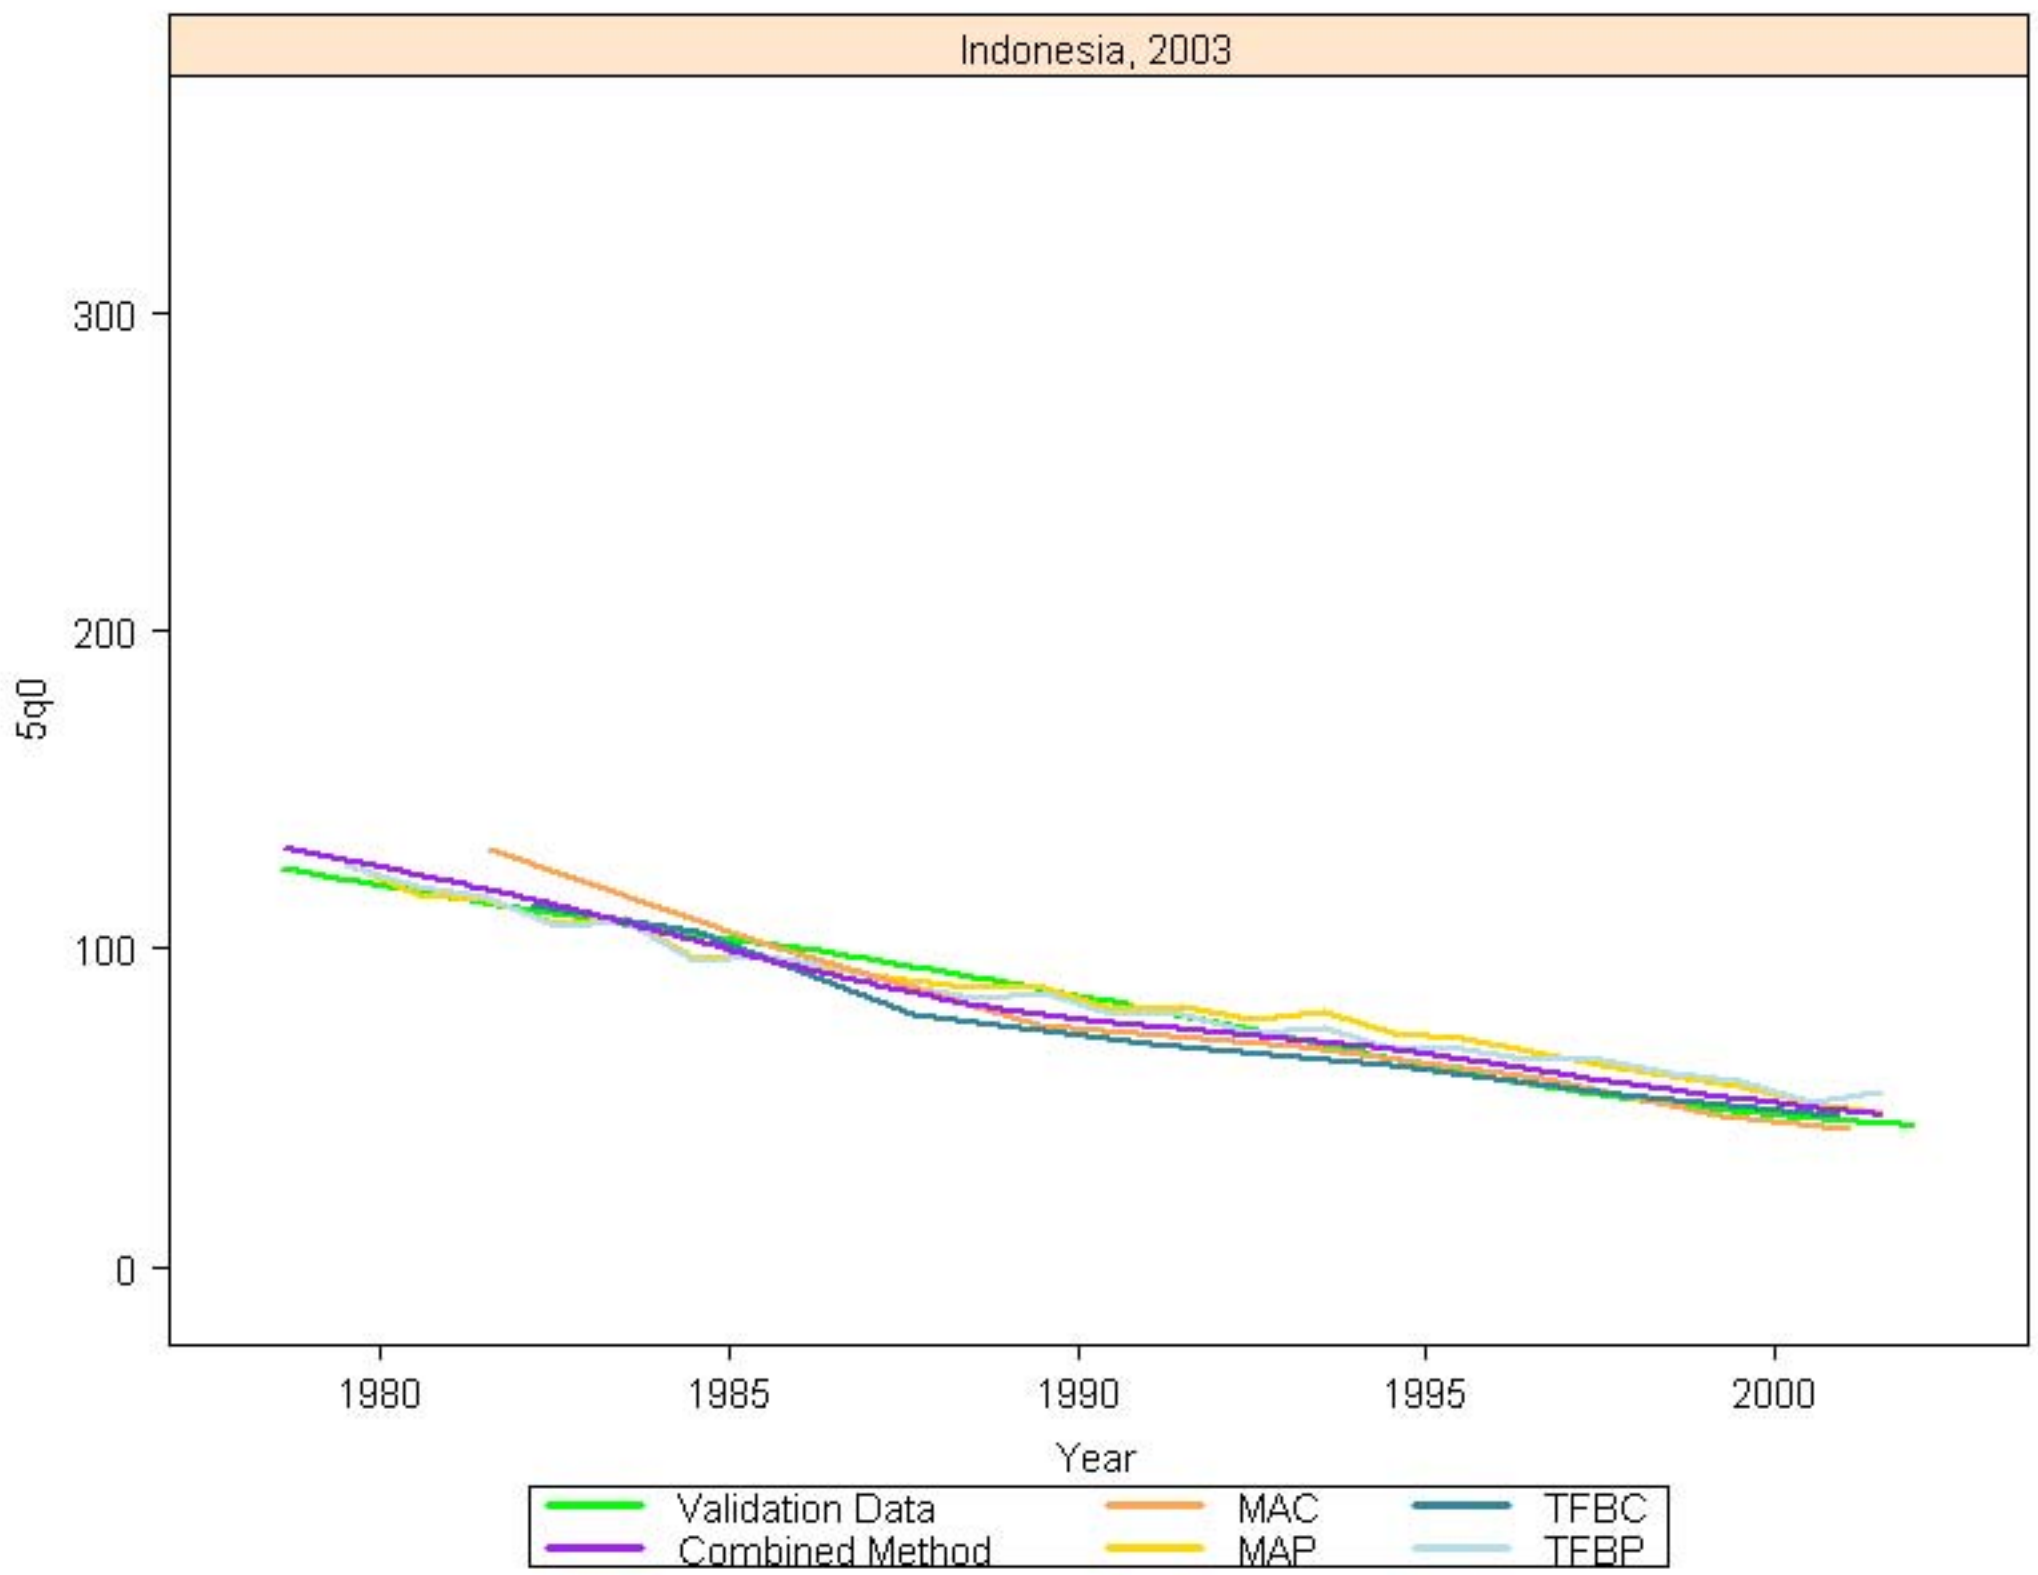

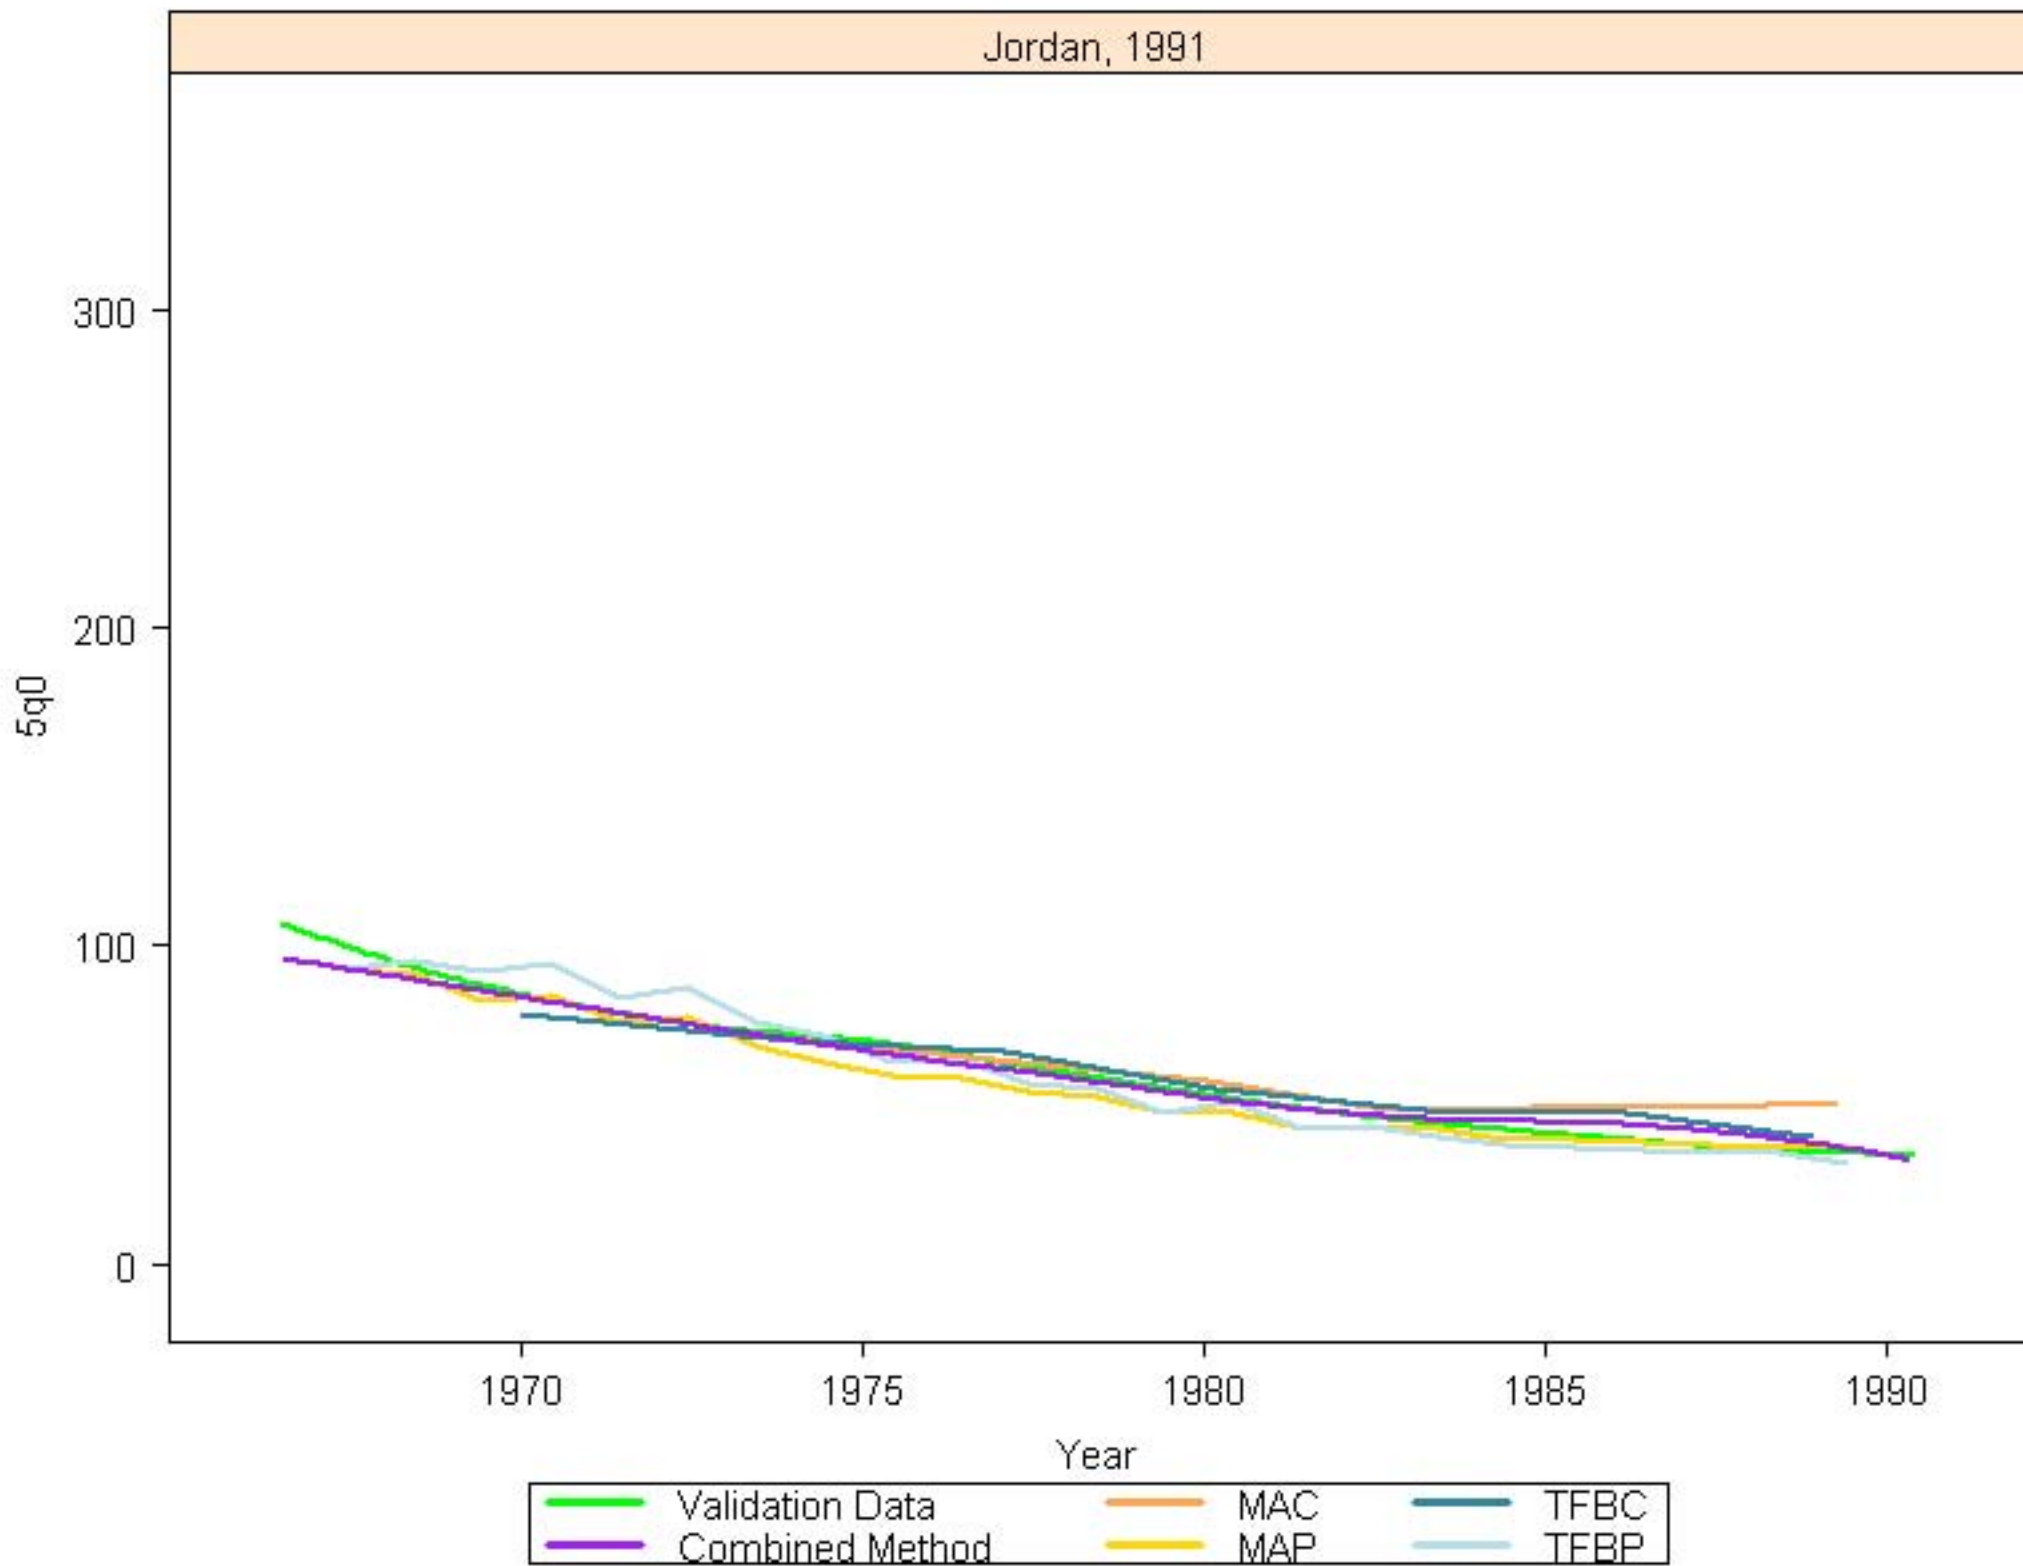

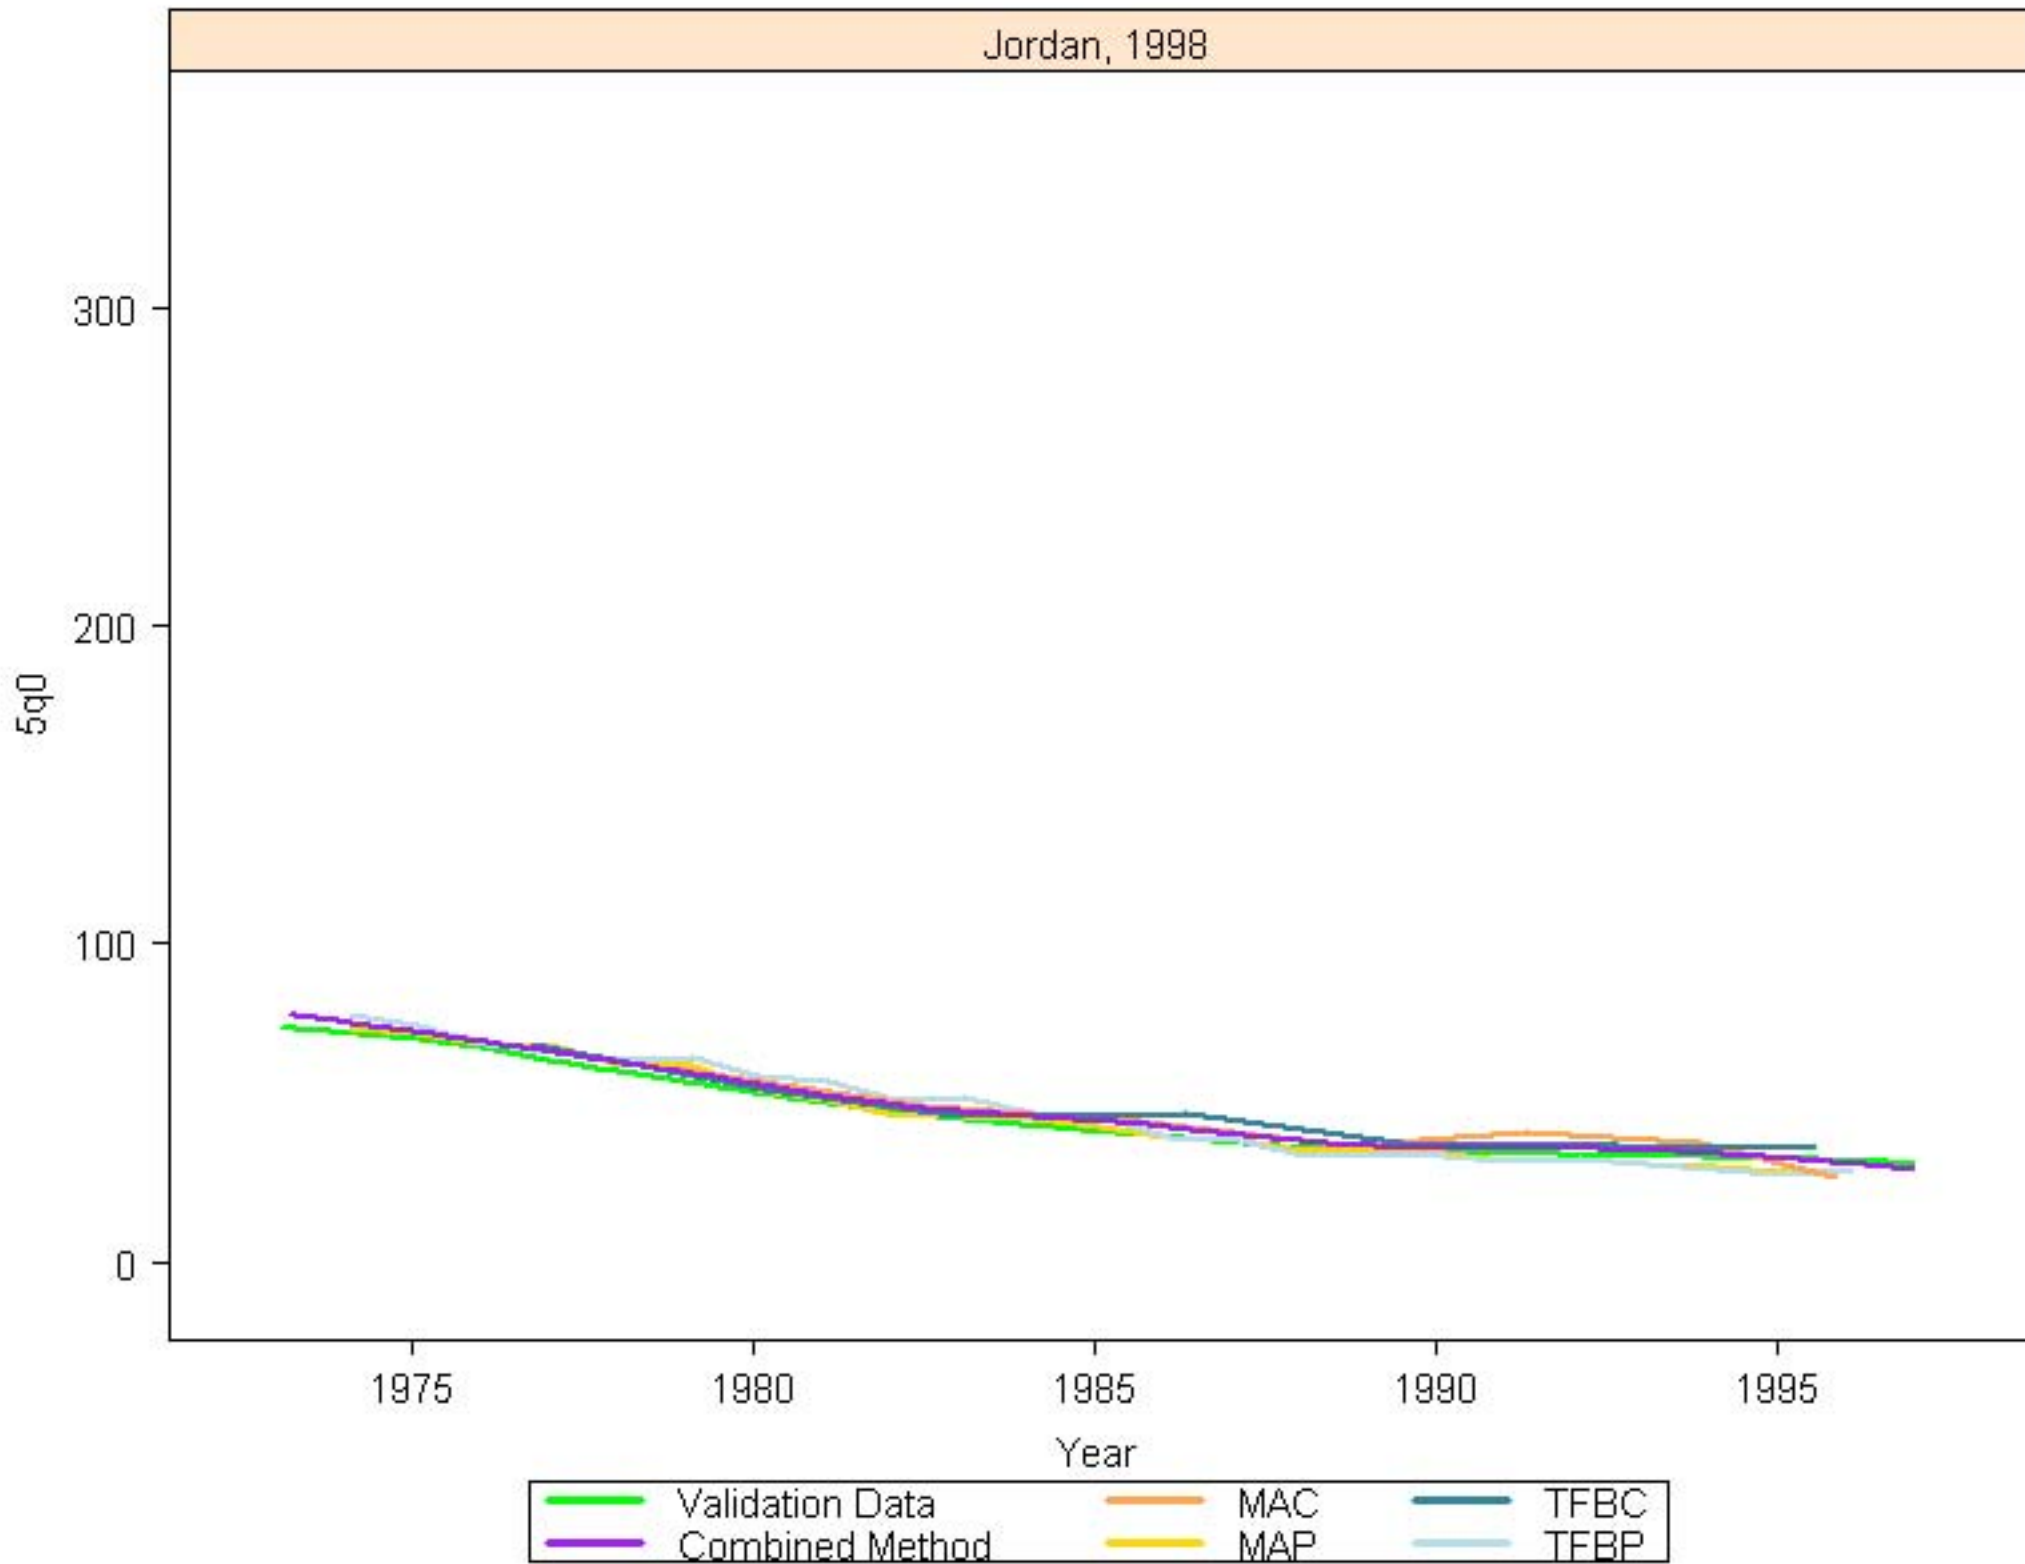

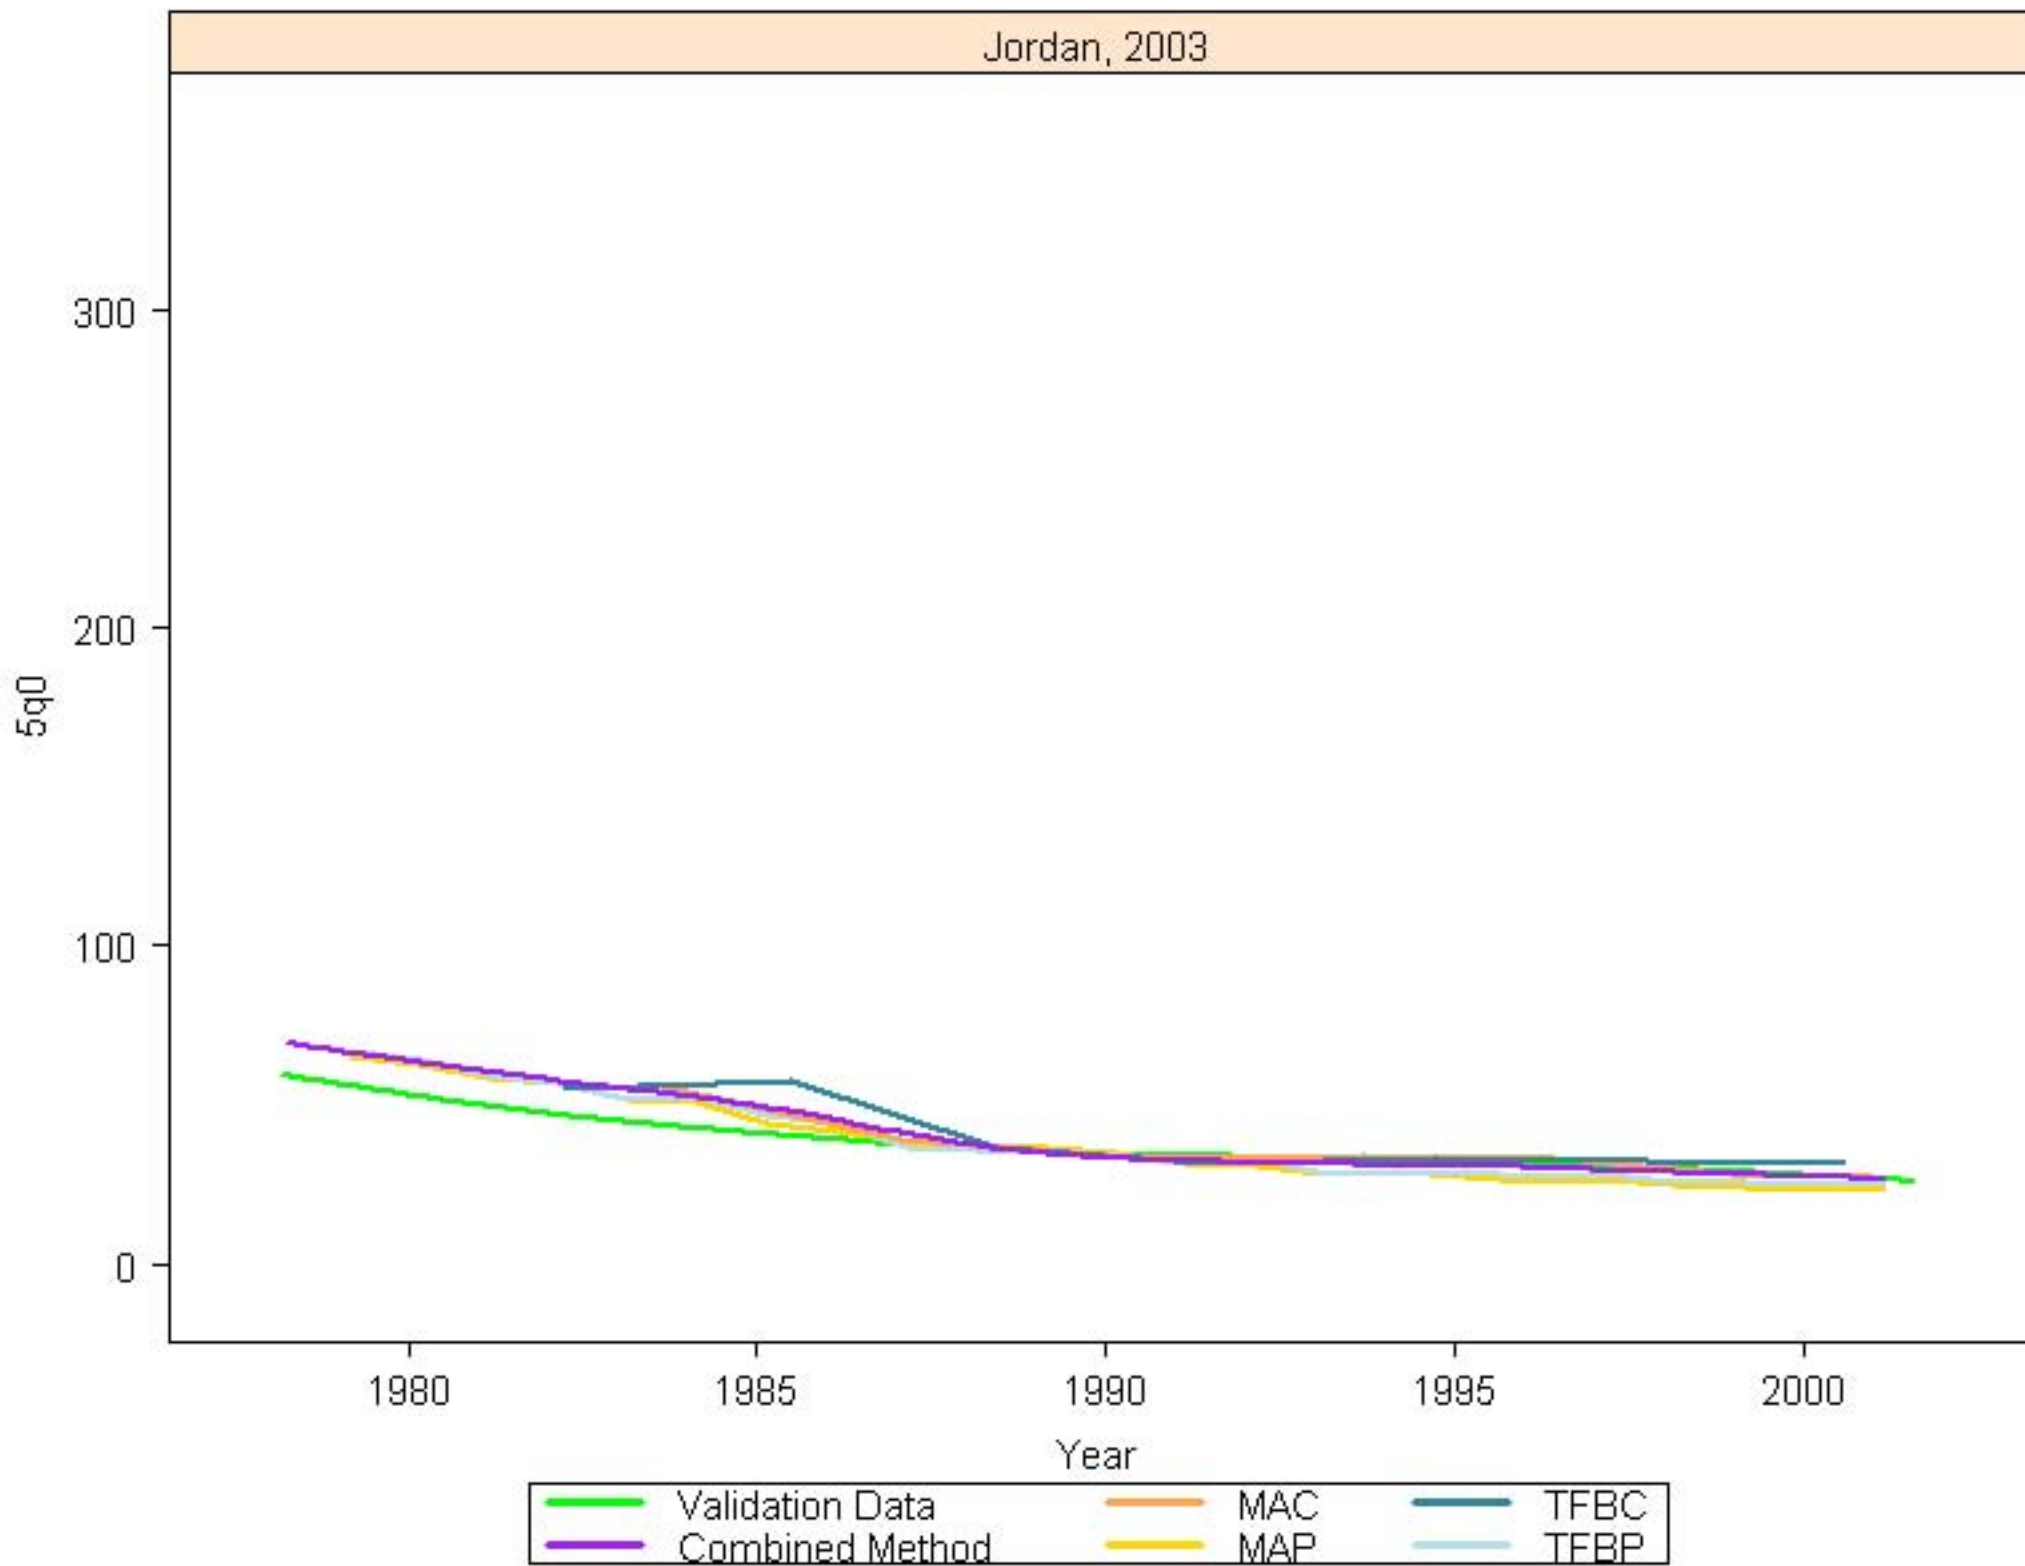

Kazakhstan, 1996

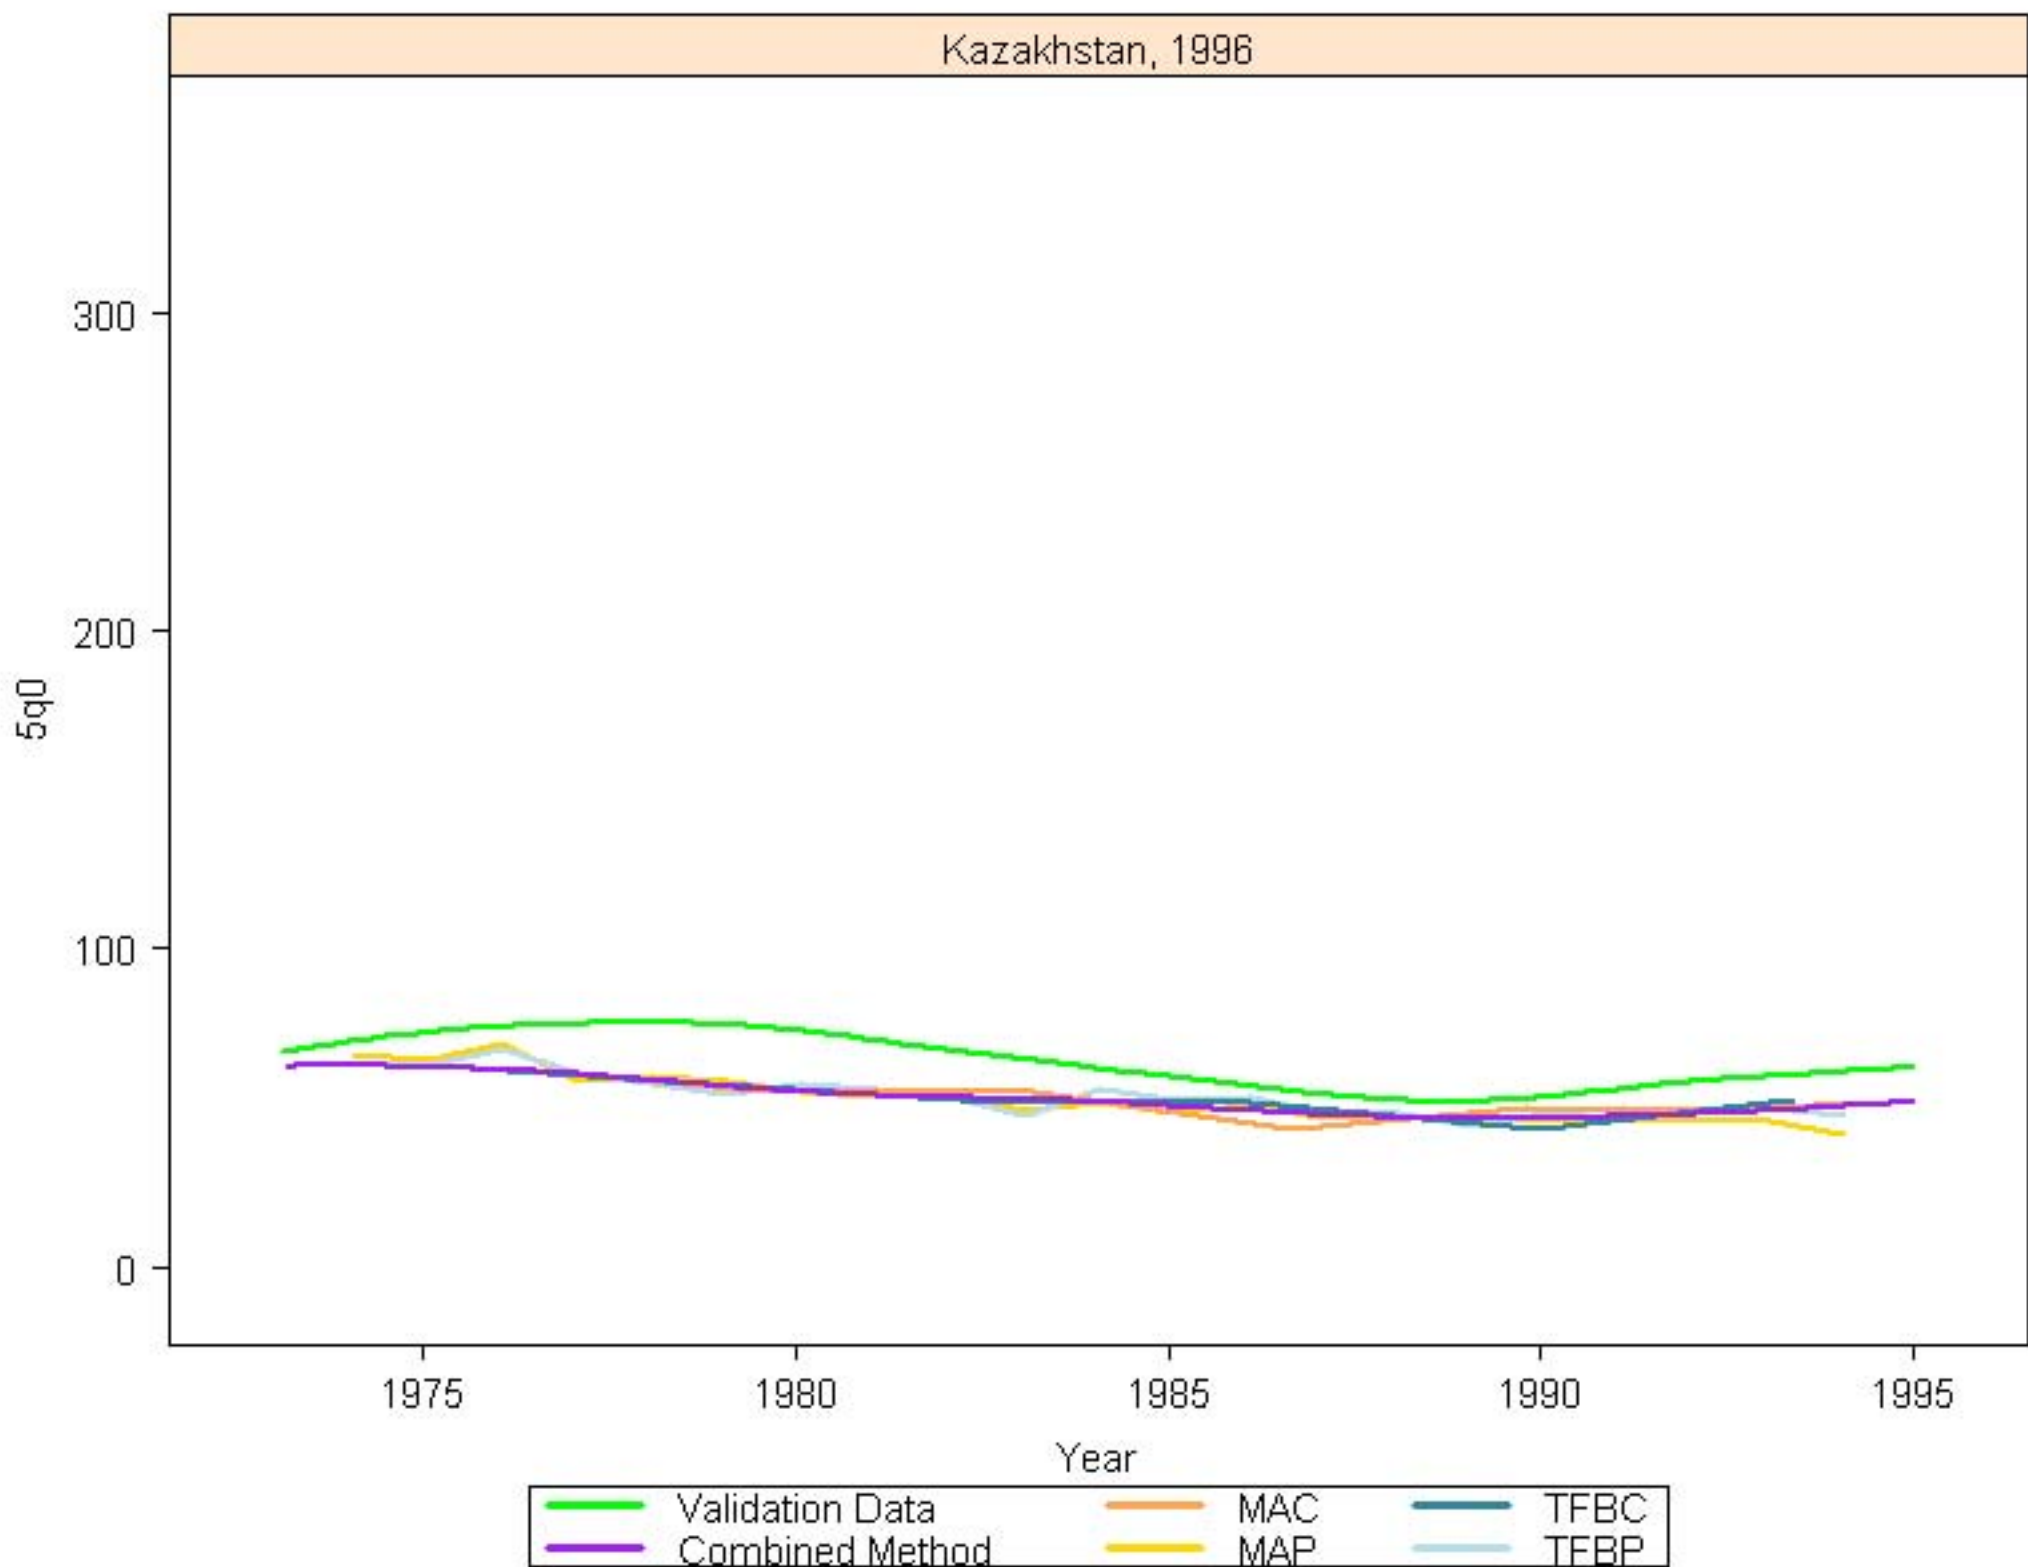



Kazakhstan, 2000

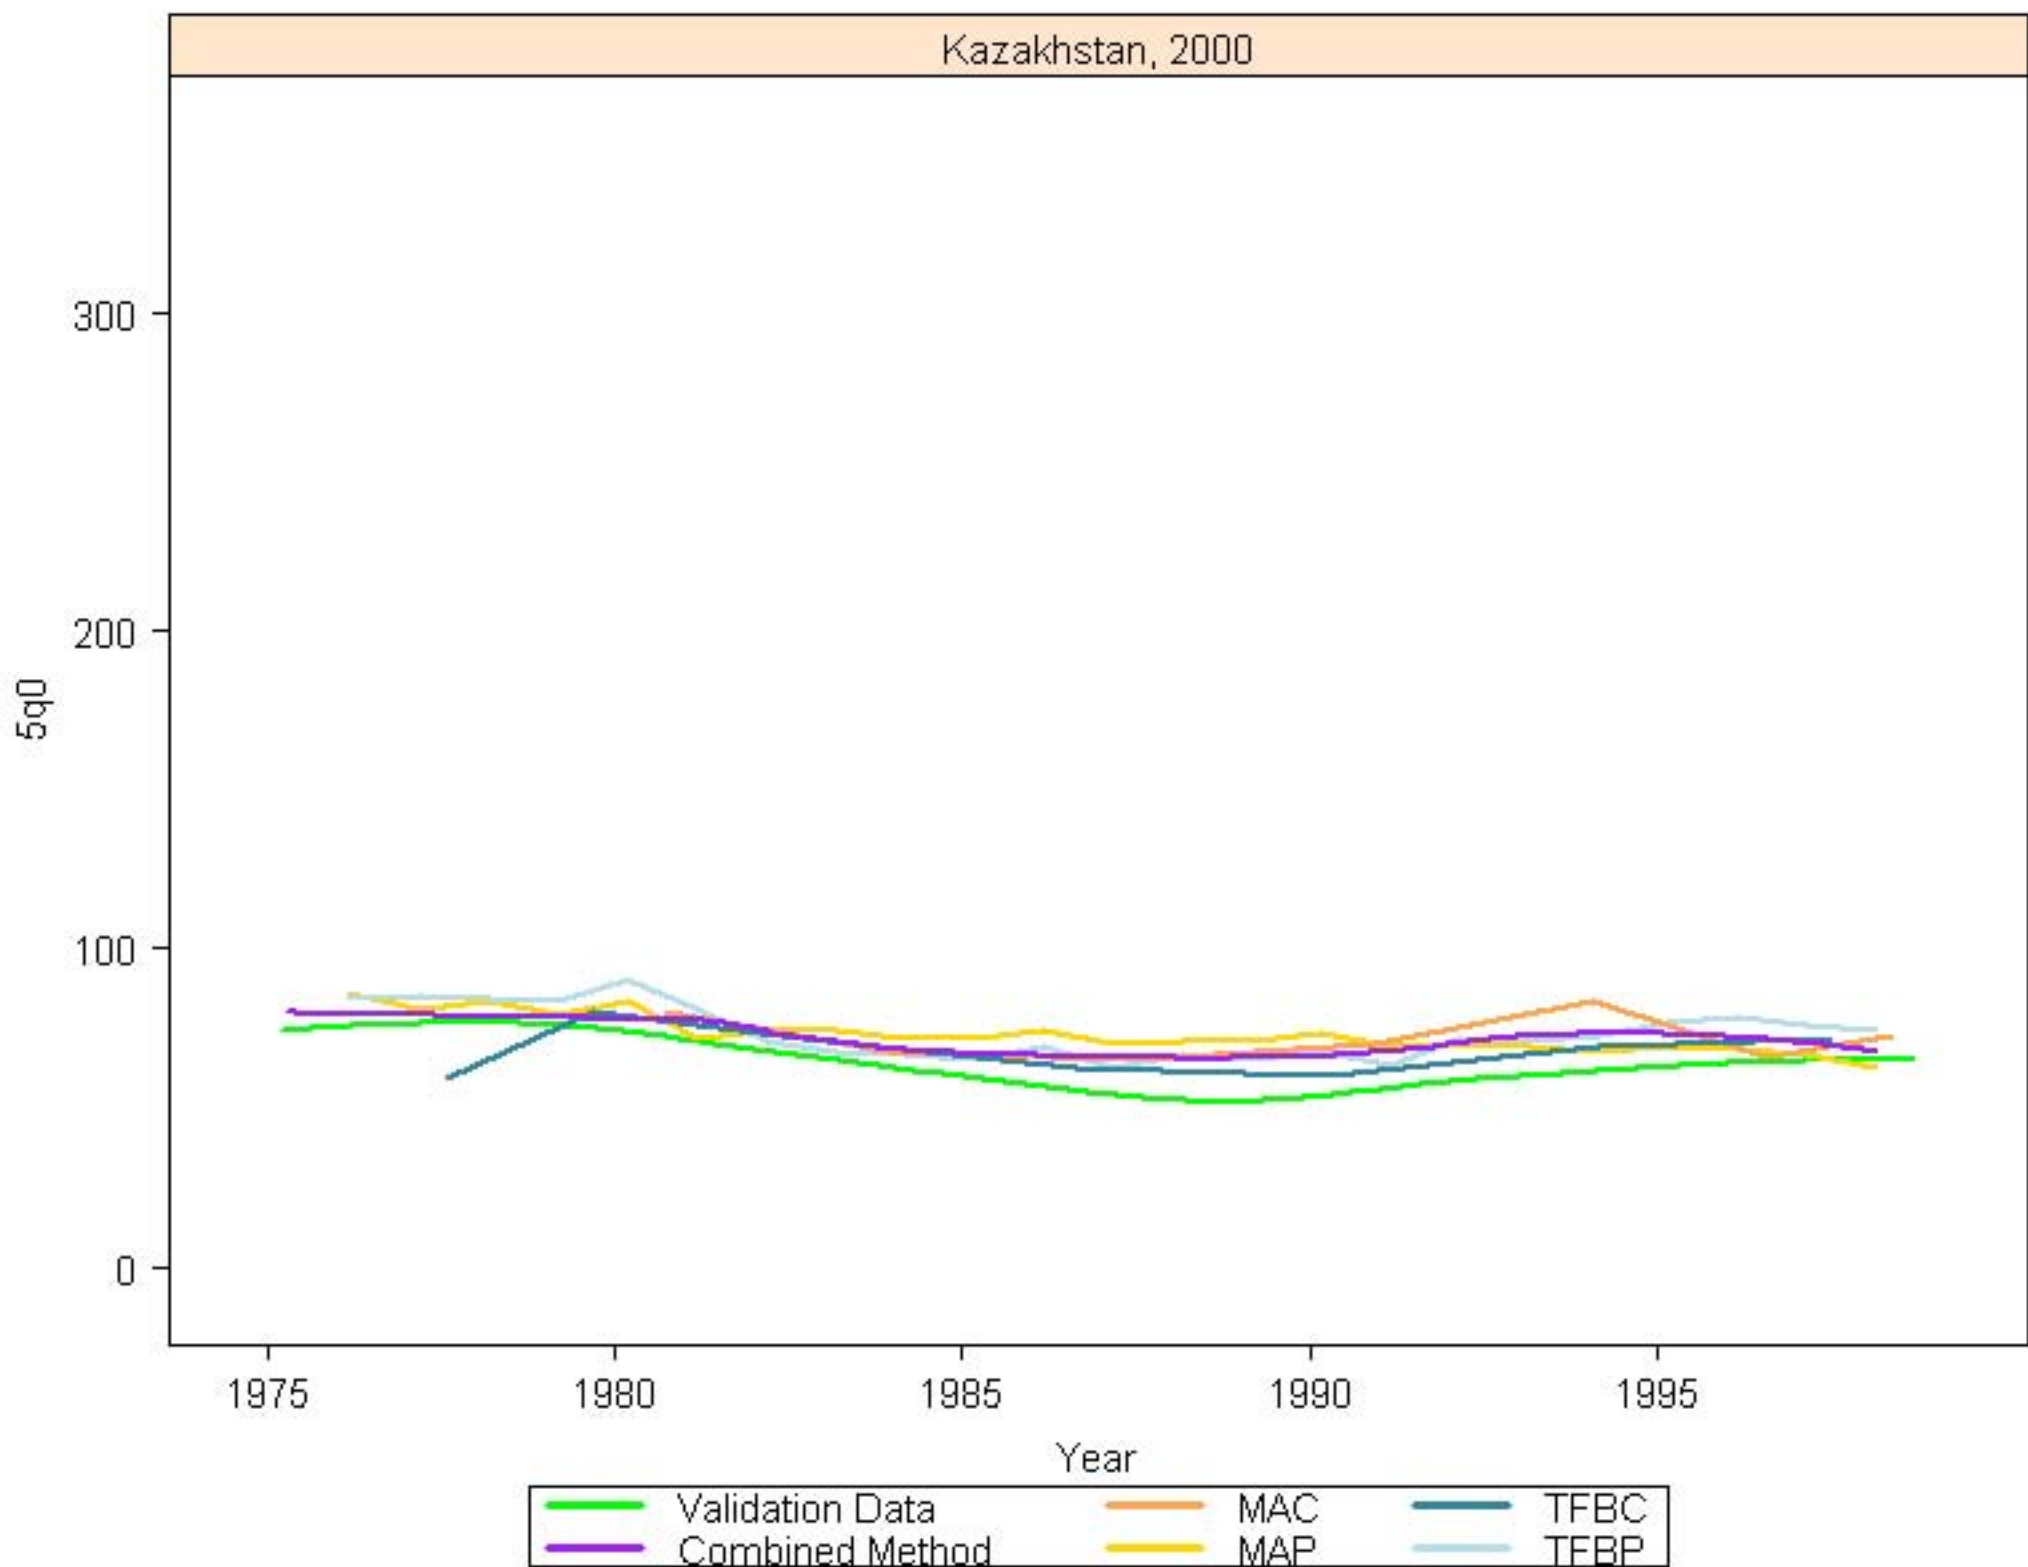

Kenya, 1989

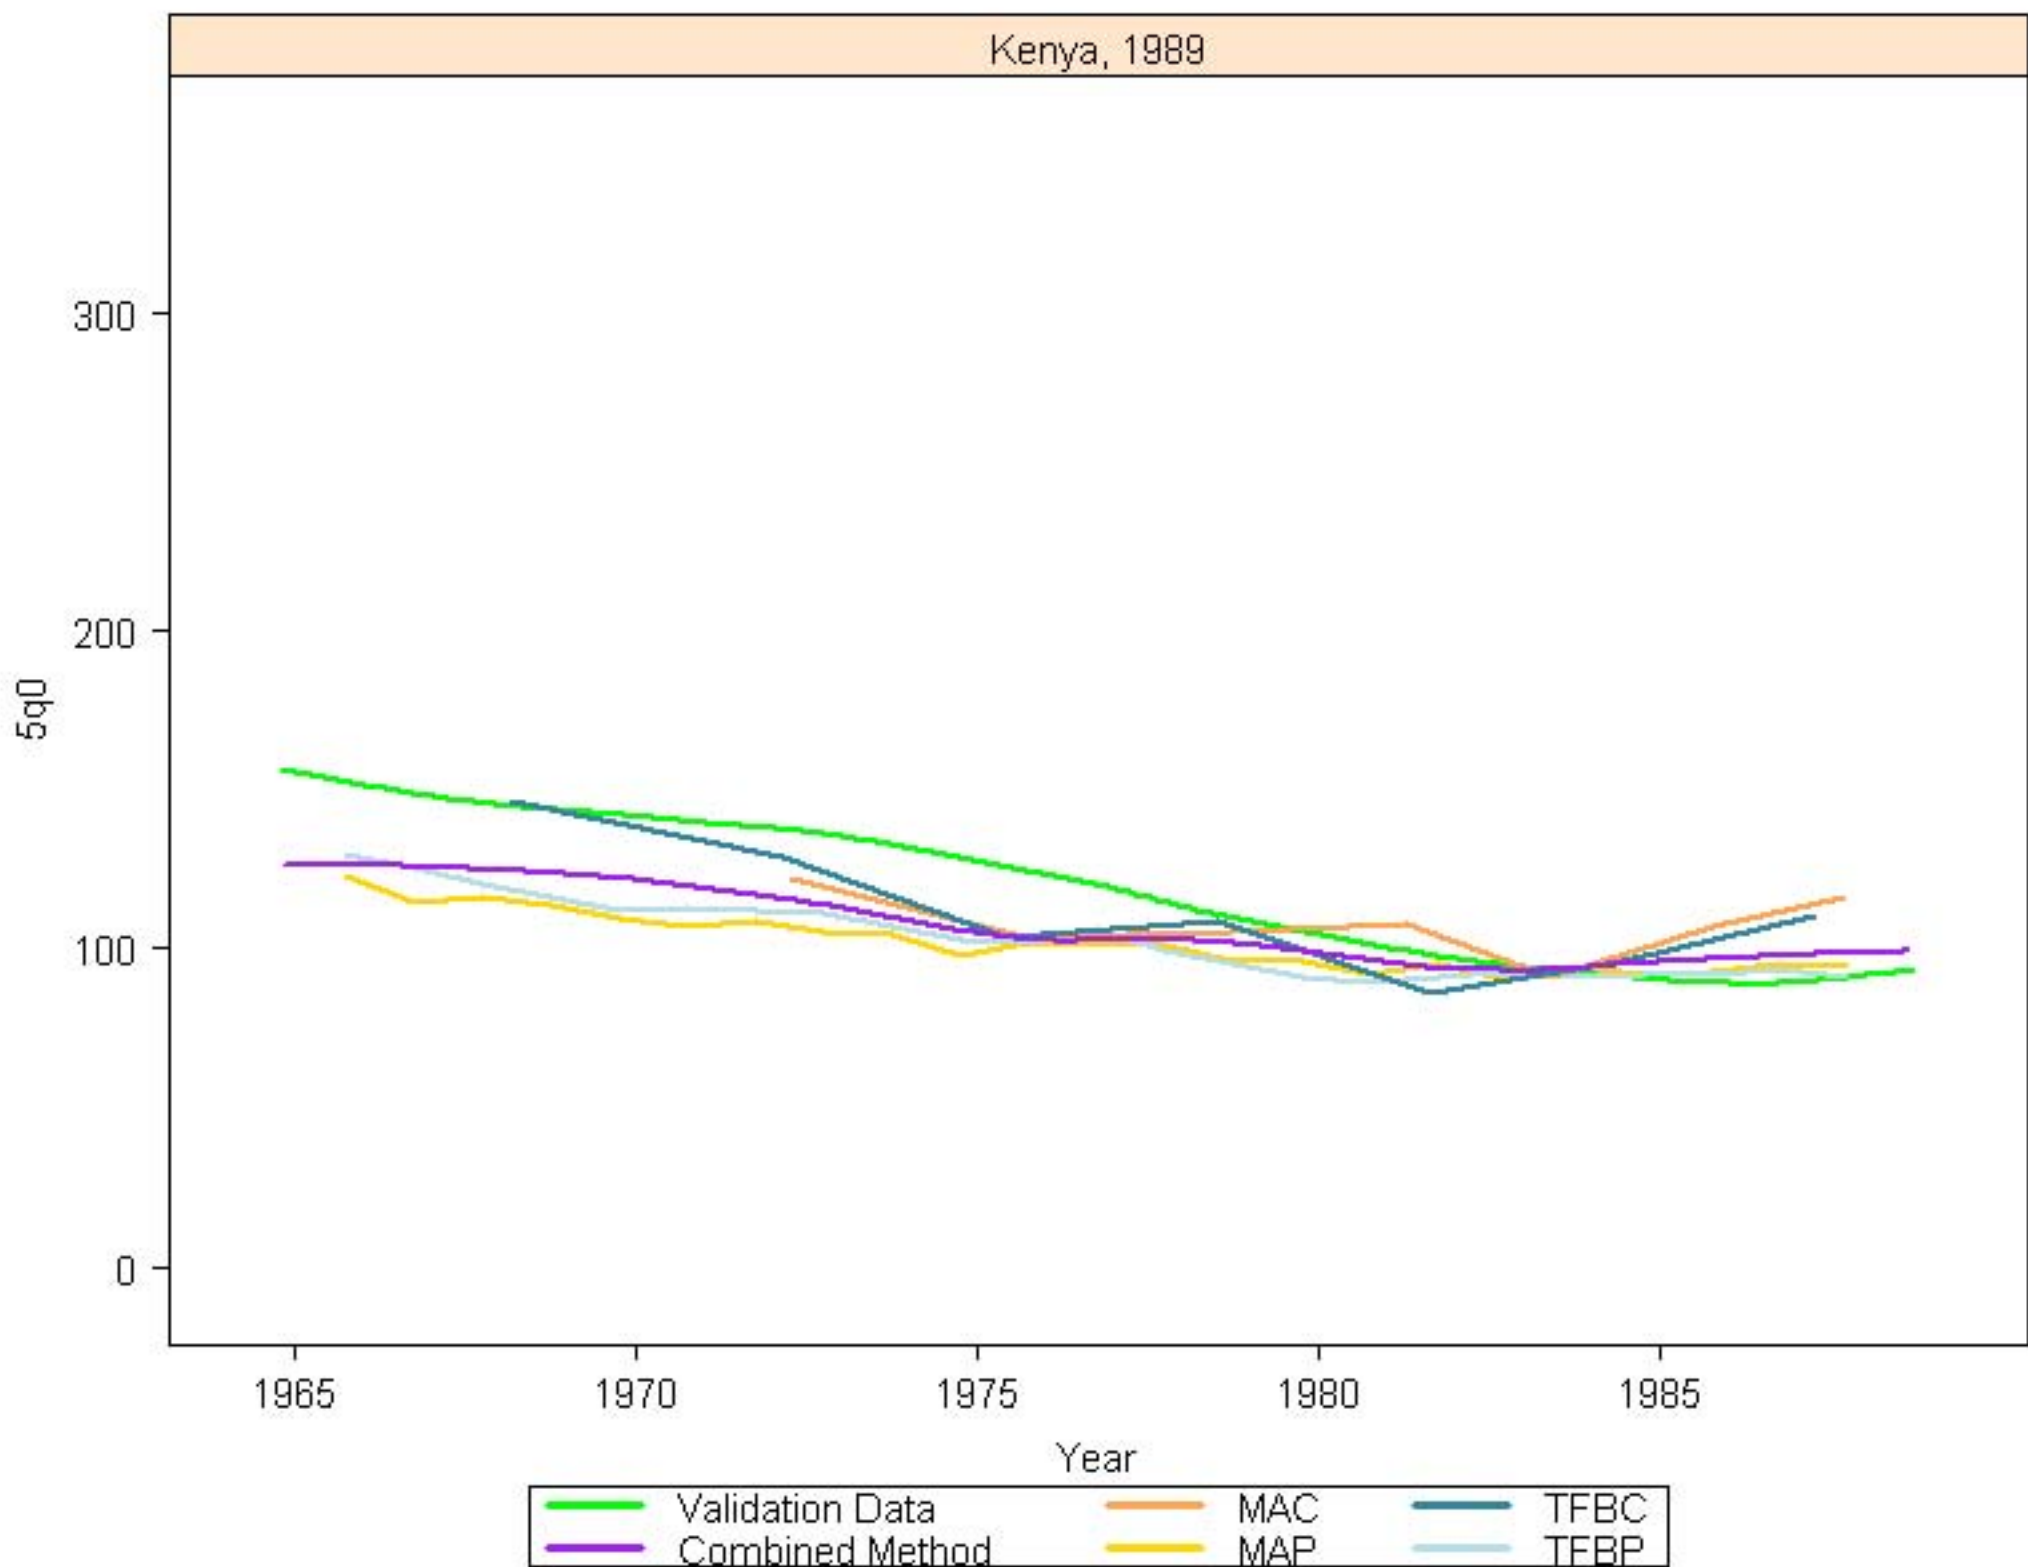

Kenya, 1993

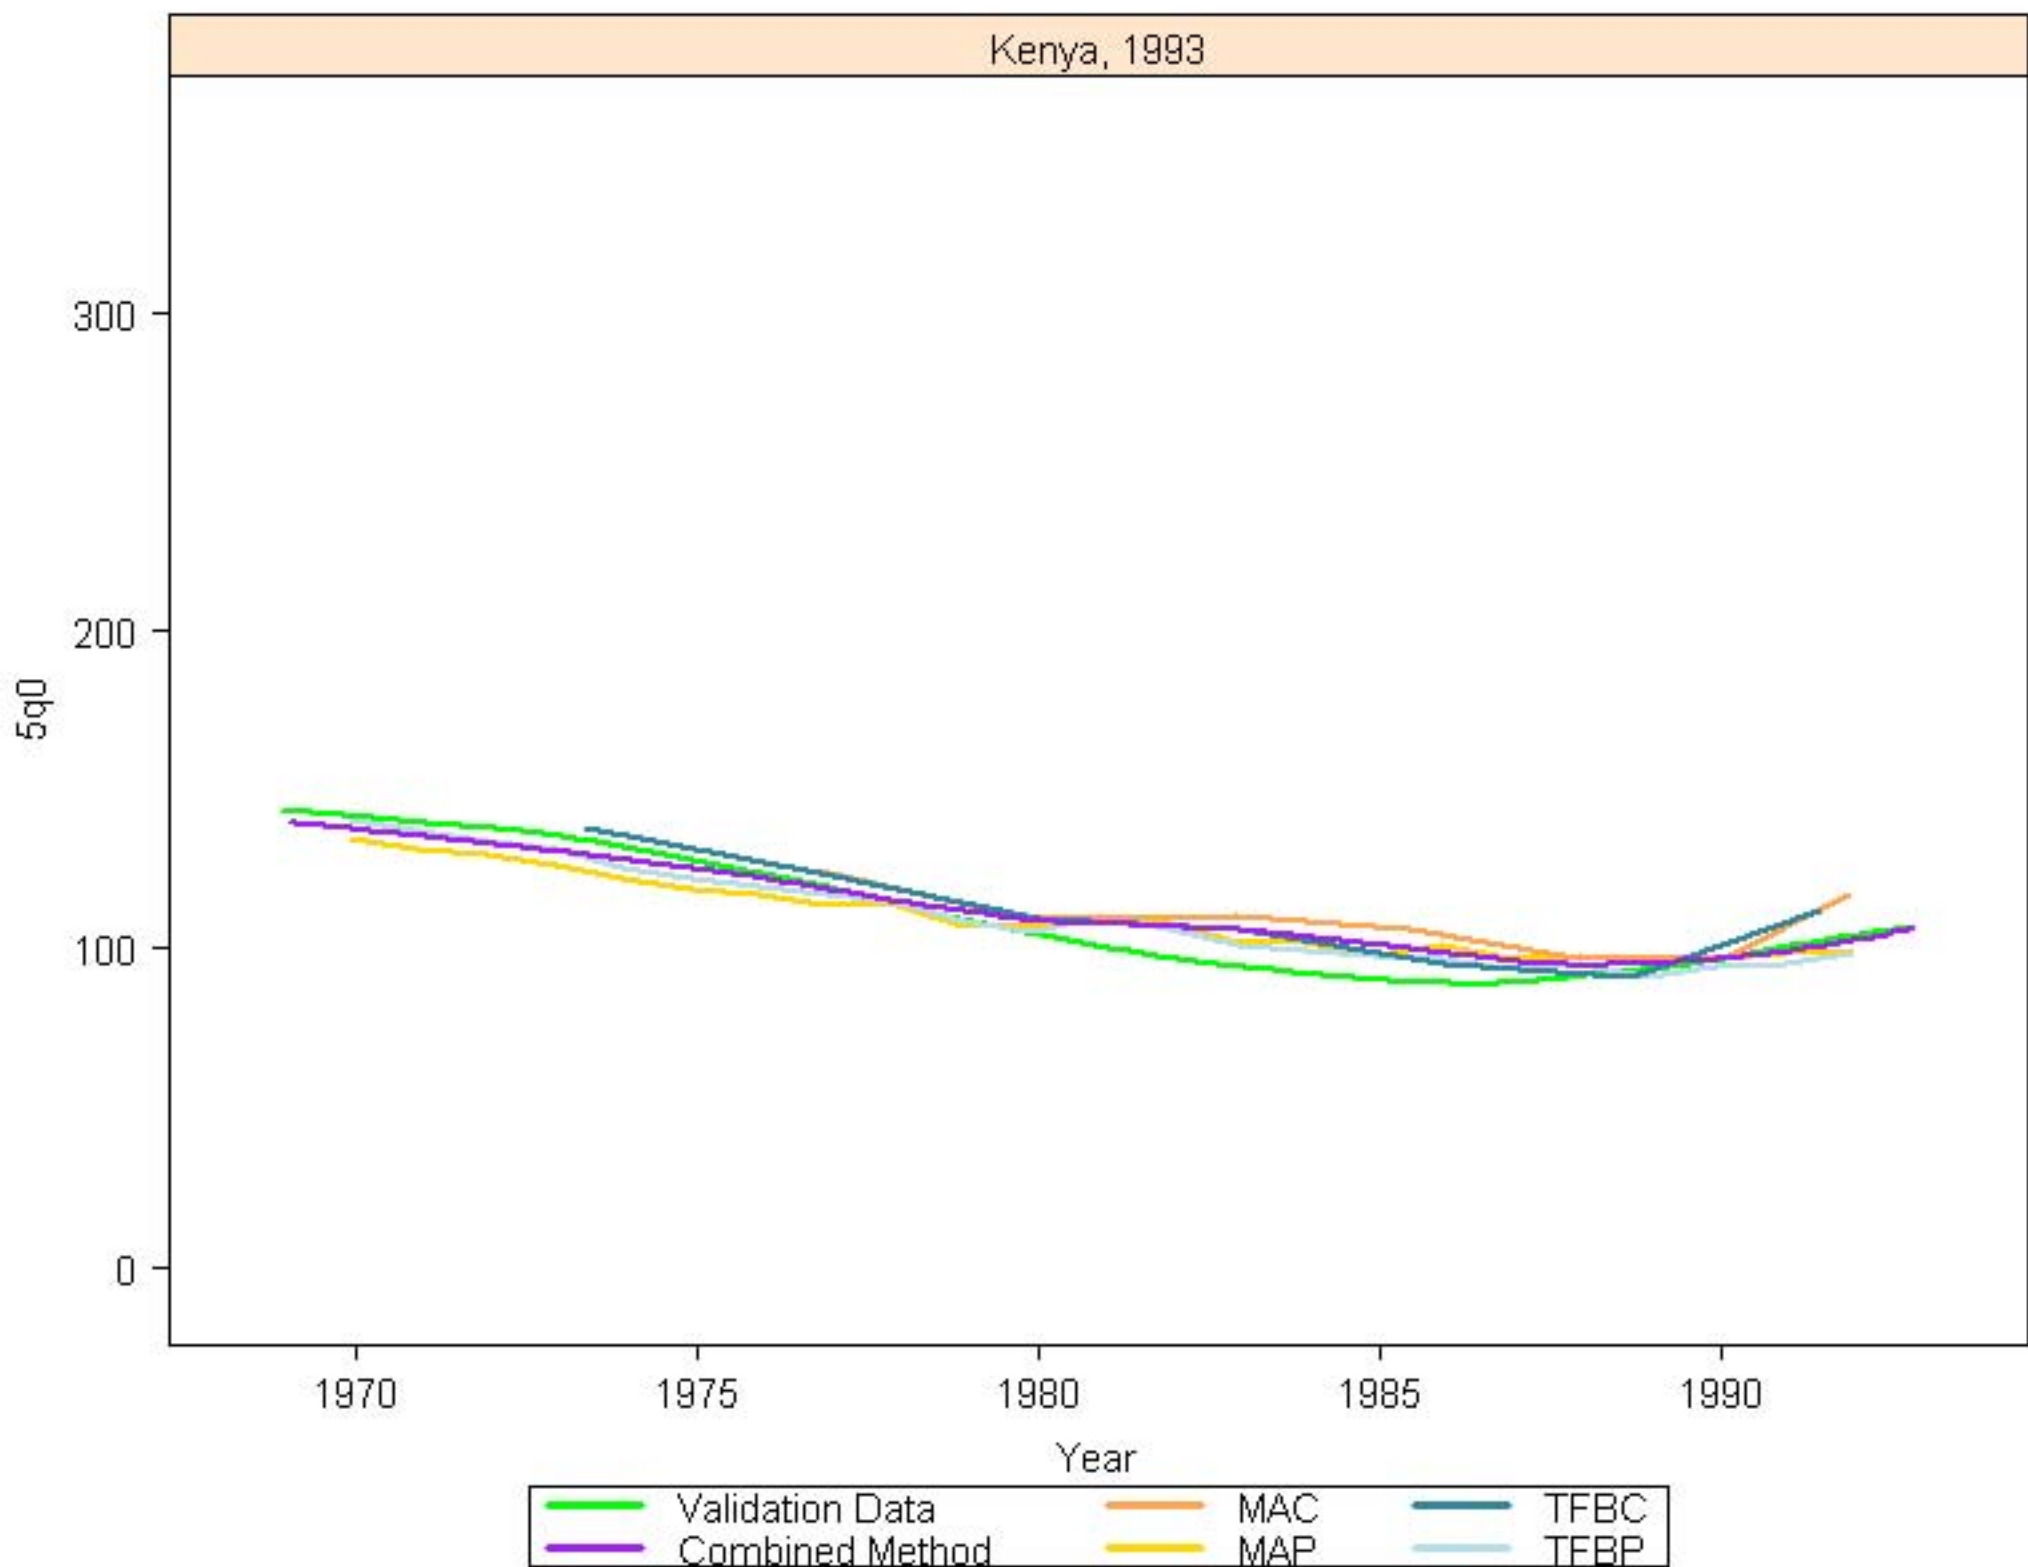

Kenya, 1998

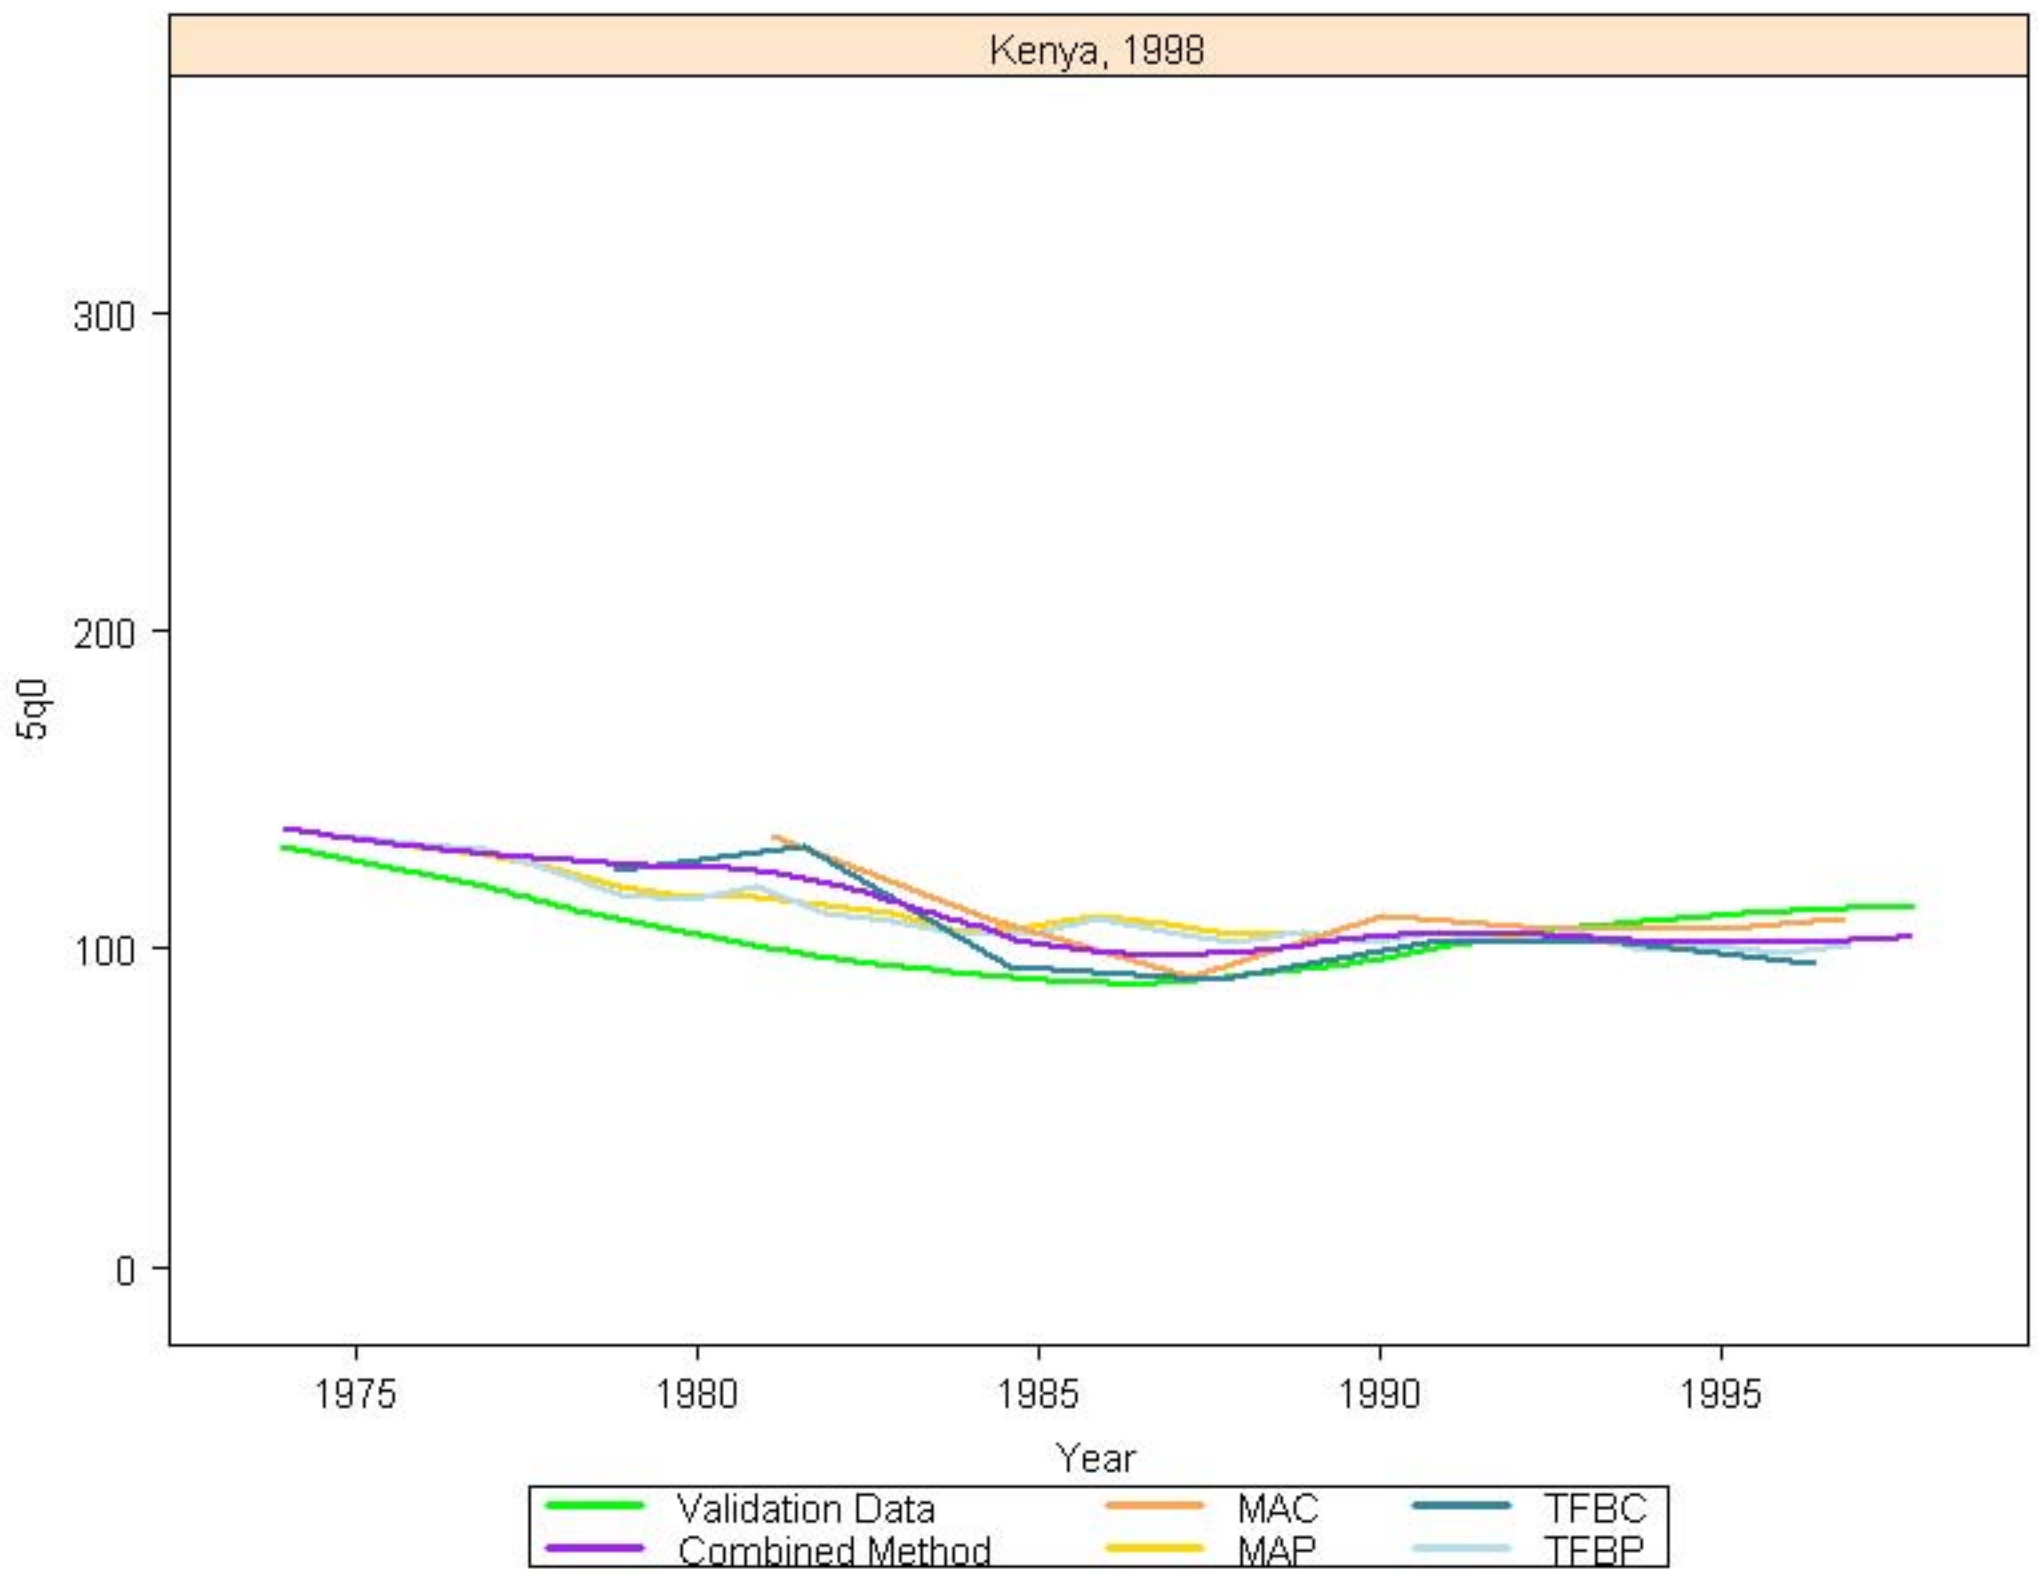

Validation Data      MAC      TFBC  
Combined Method      MAP      TFBP

Kenya, 2003

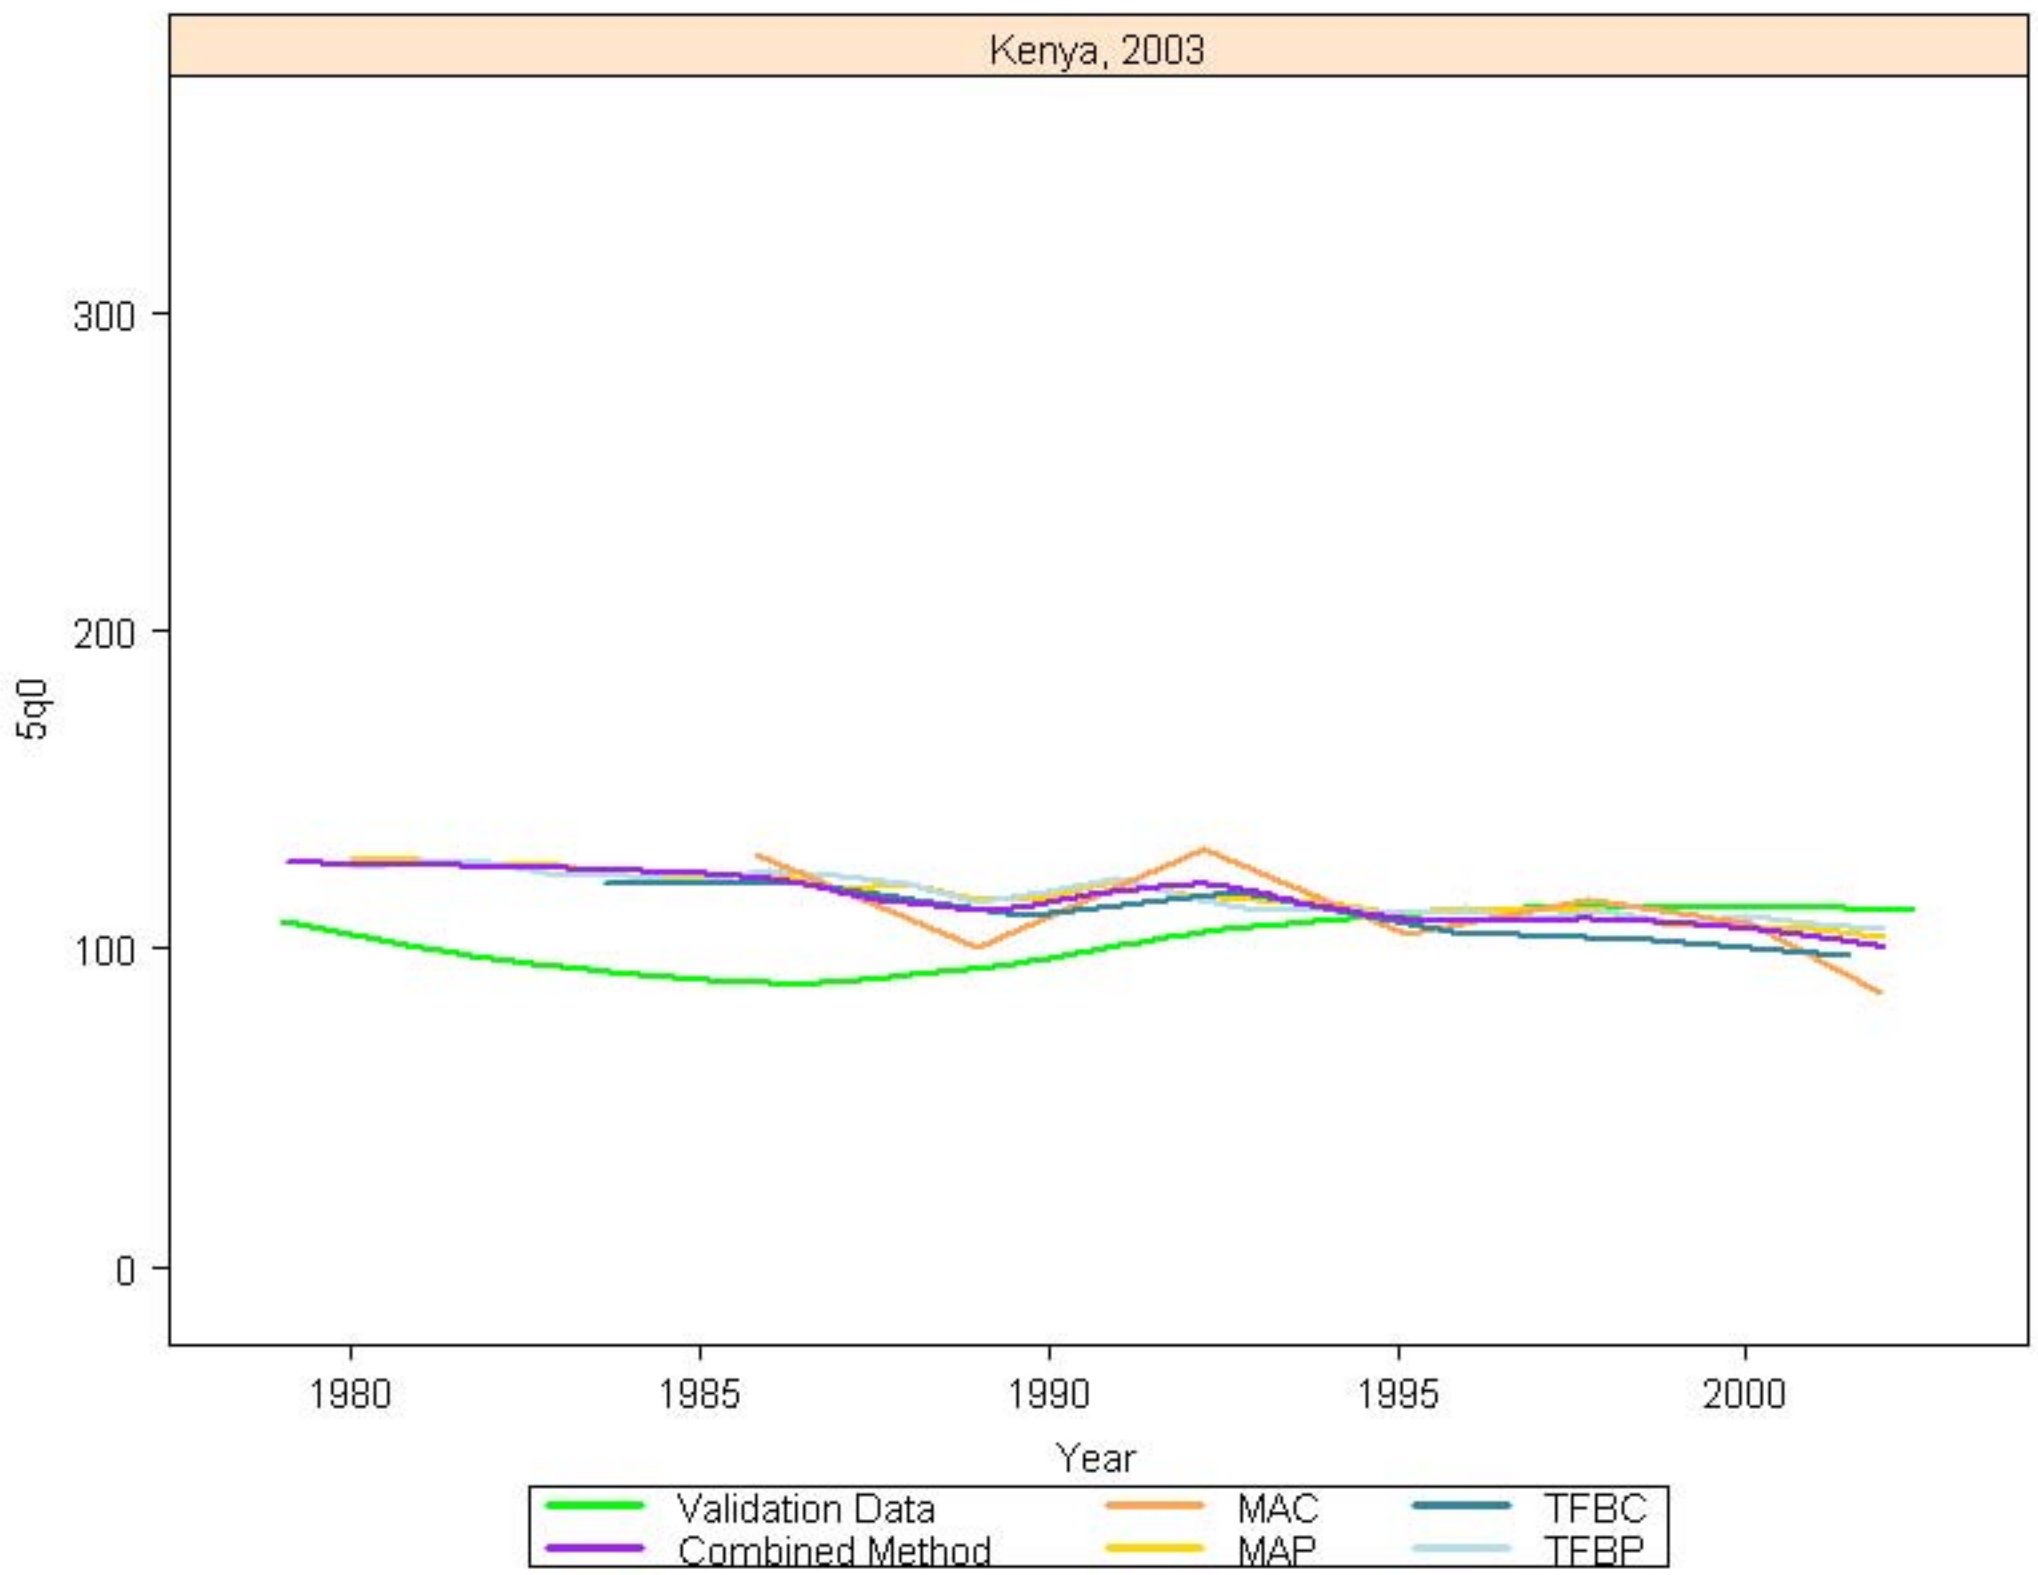

Validation Data      MAC      TFBC  
Combined Method      MAP      TFBP

Kyrgyz Republic, 1998

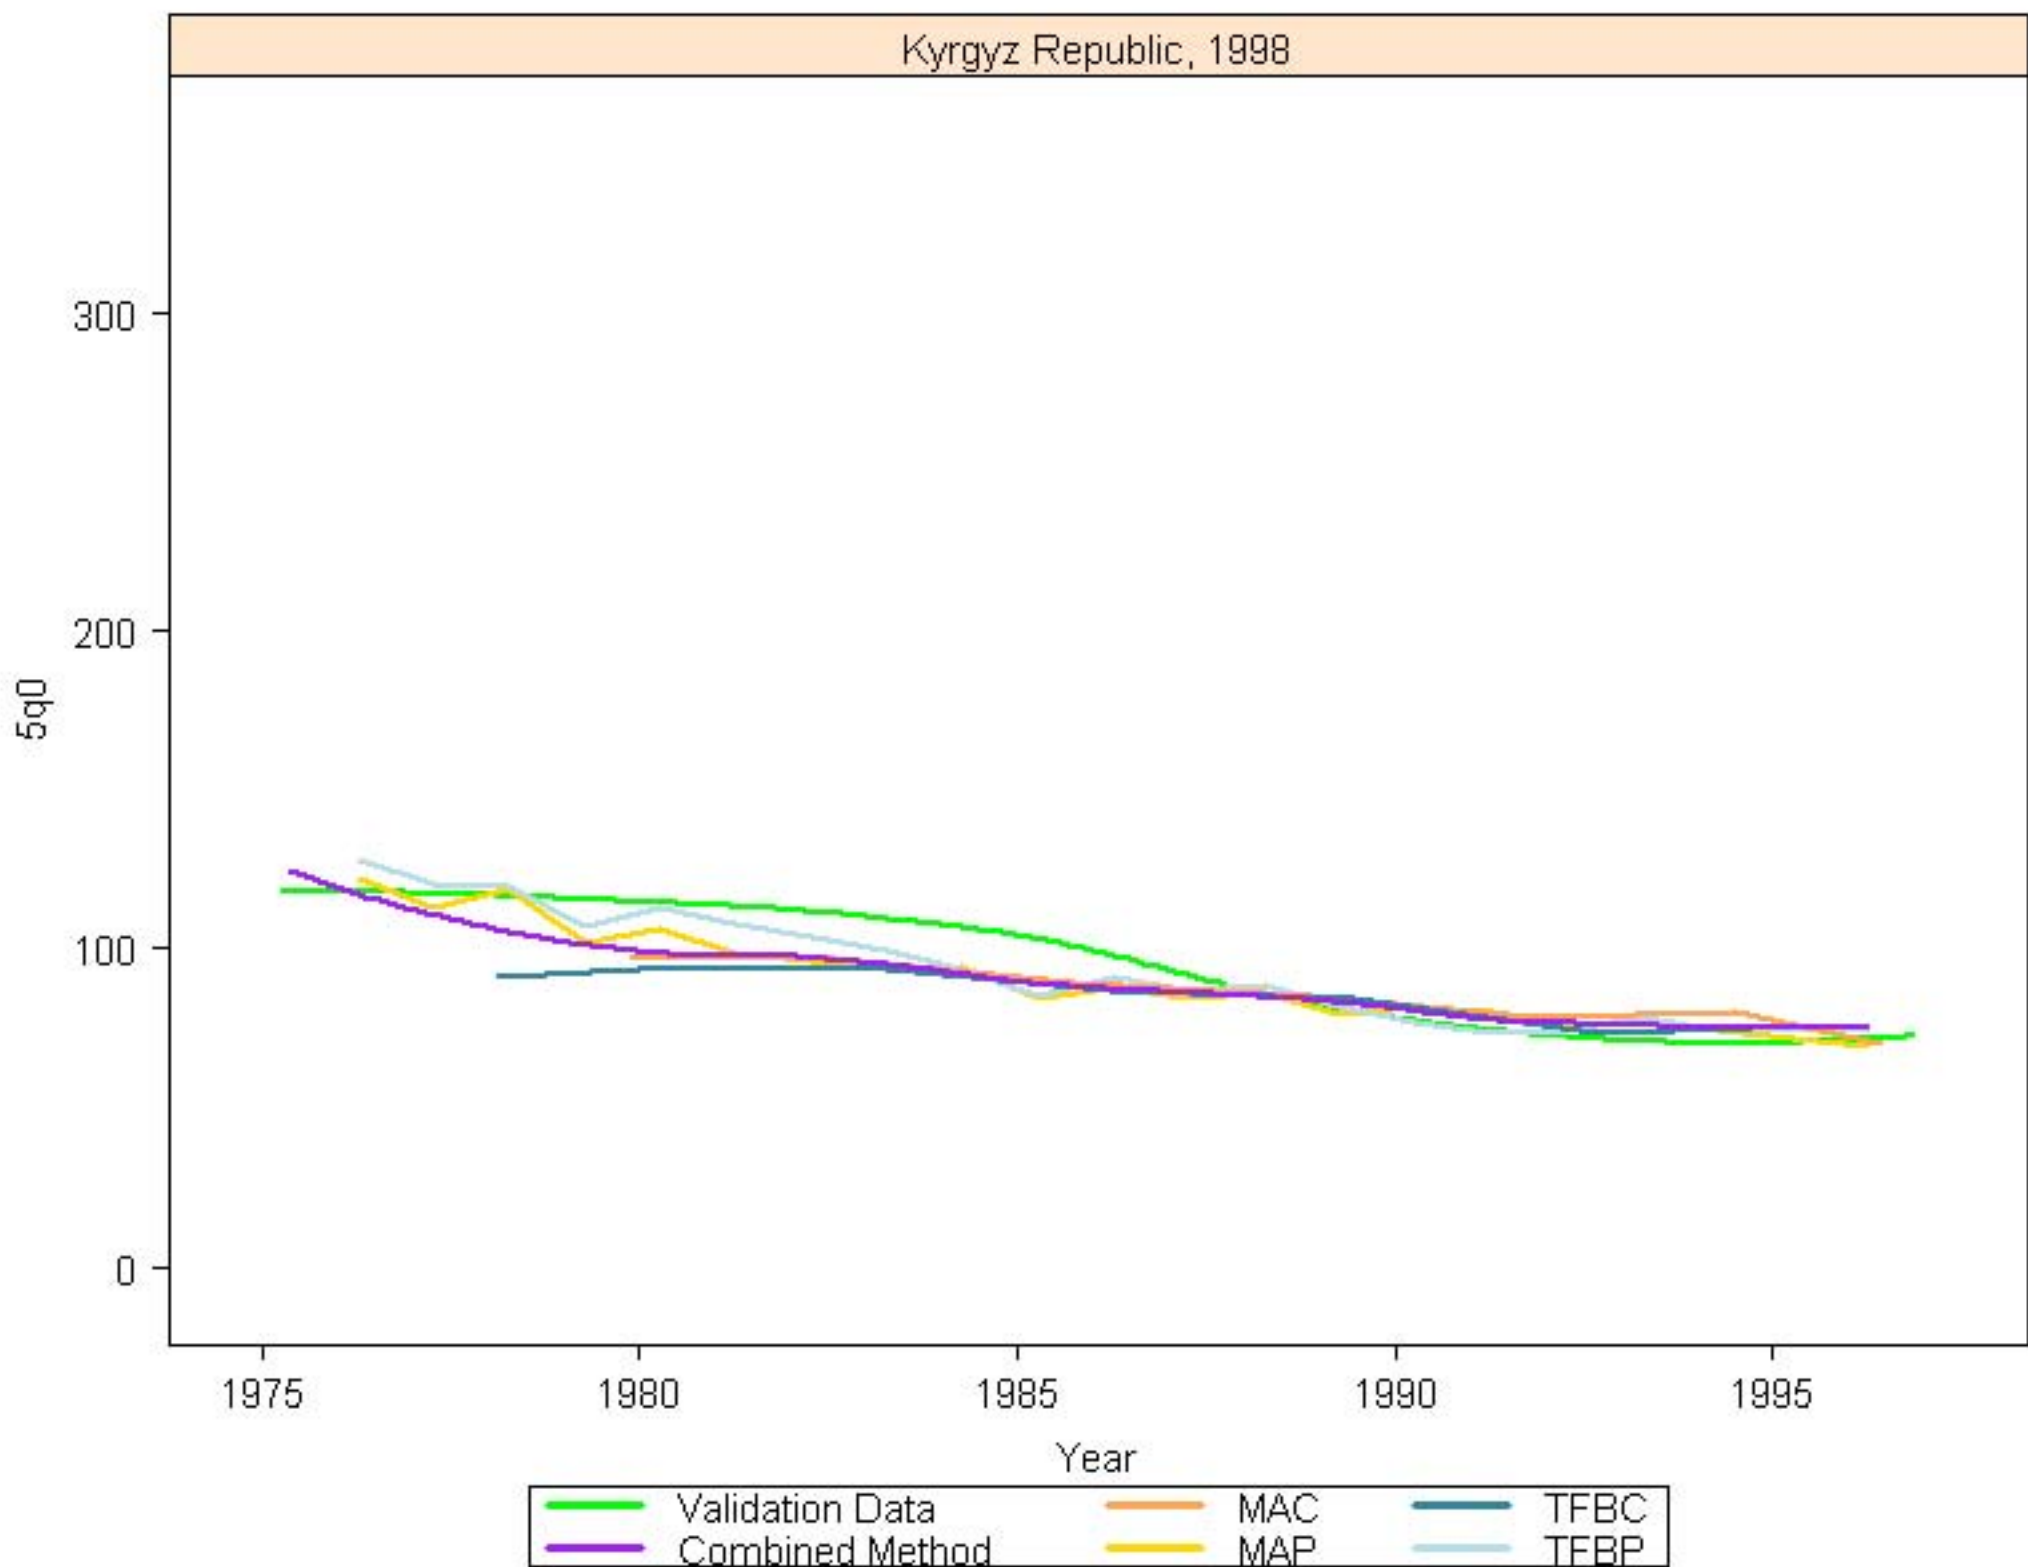

Lesotho, 2005

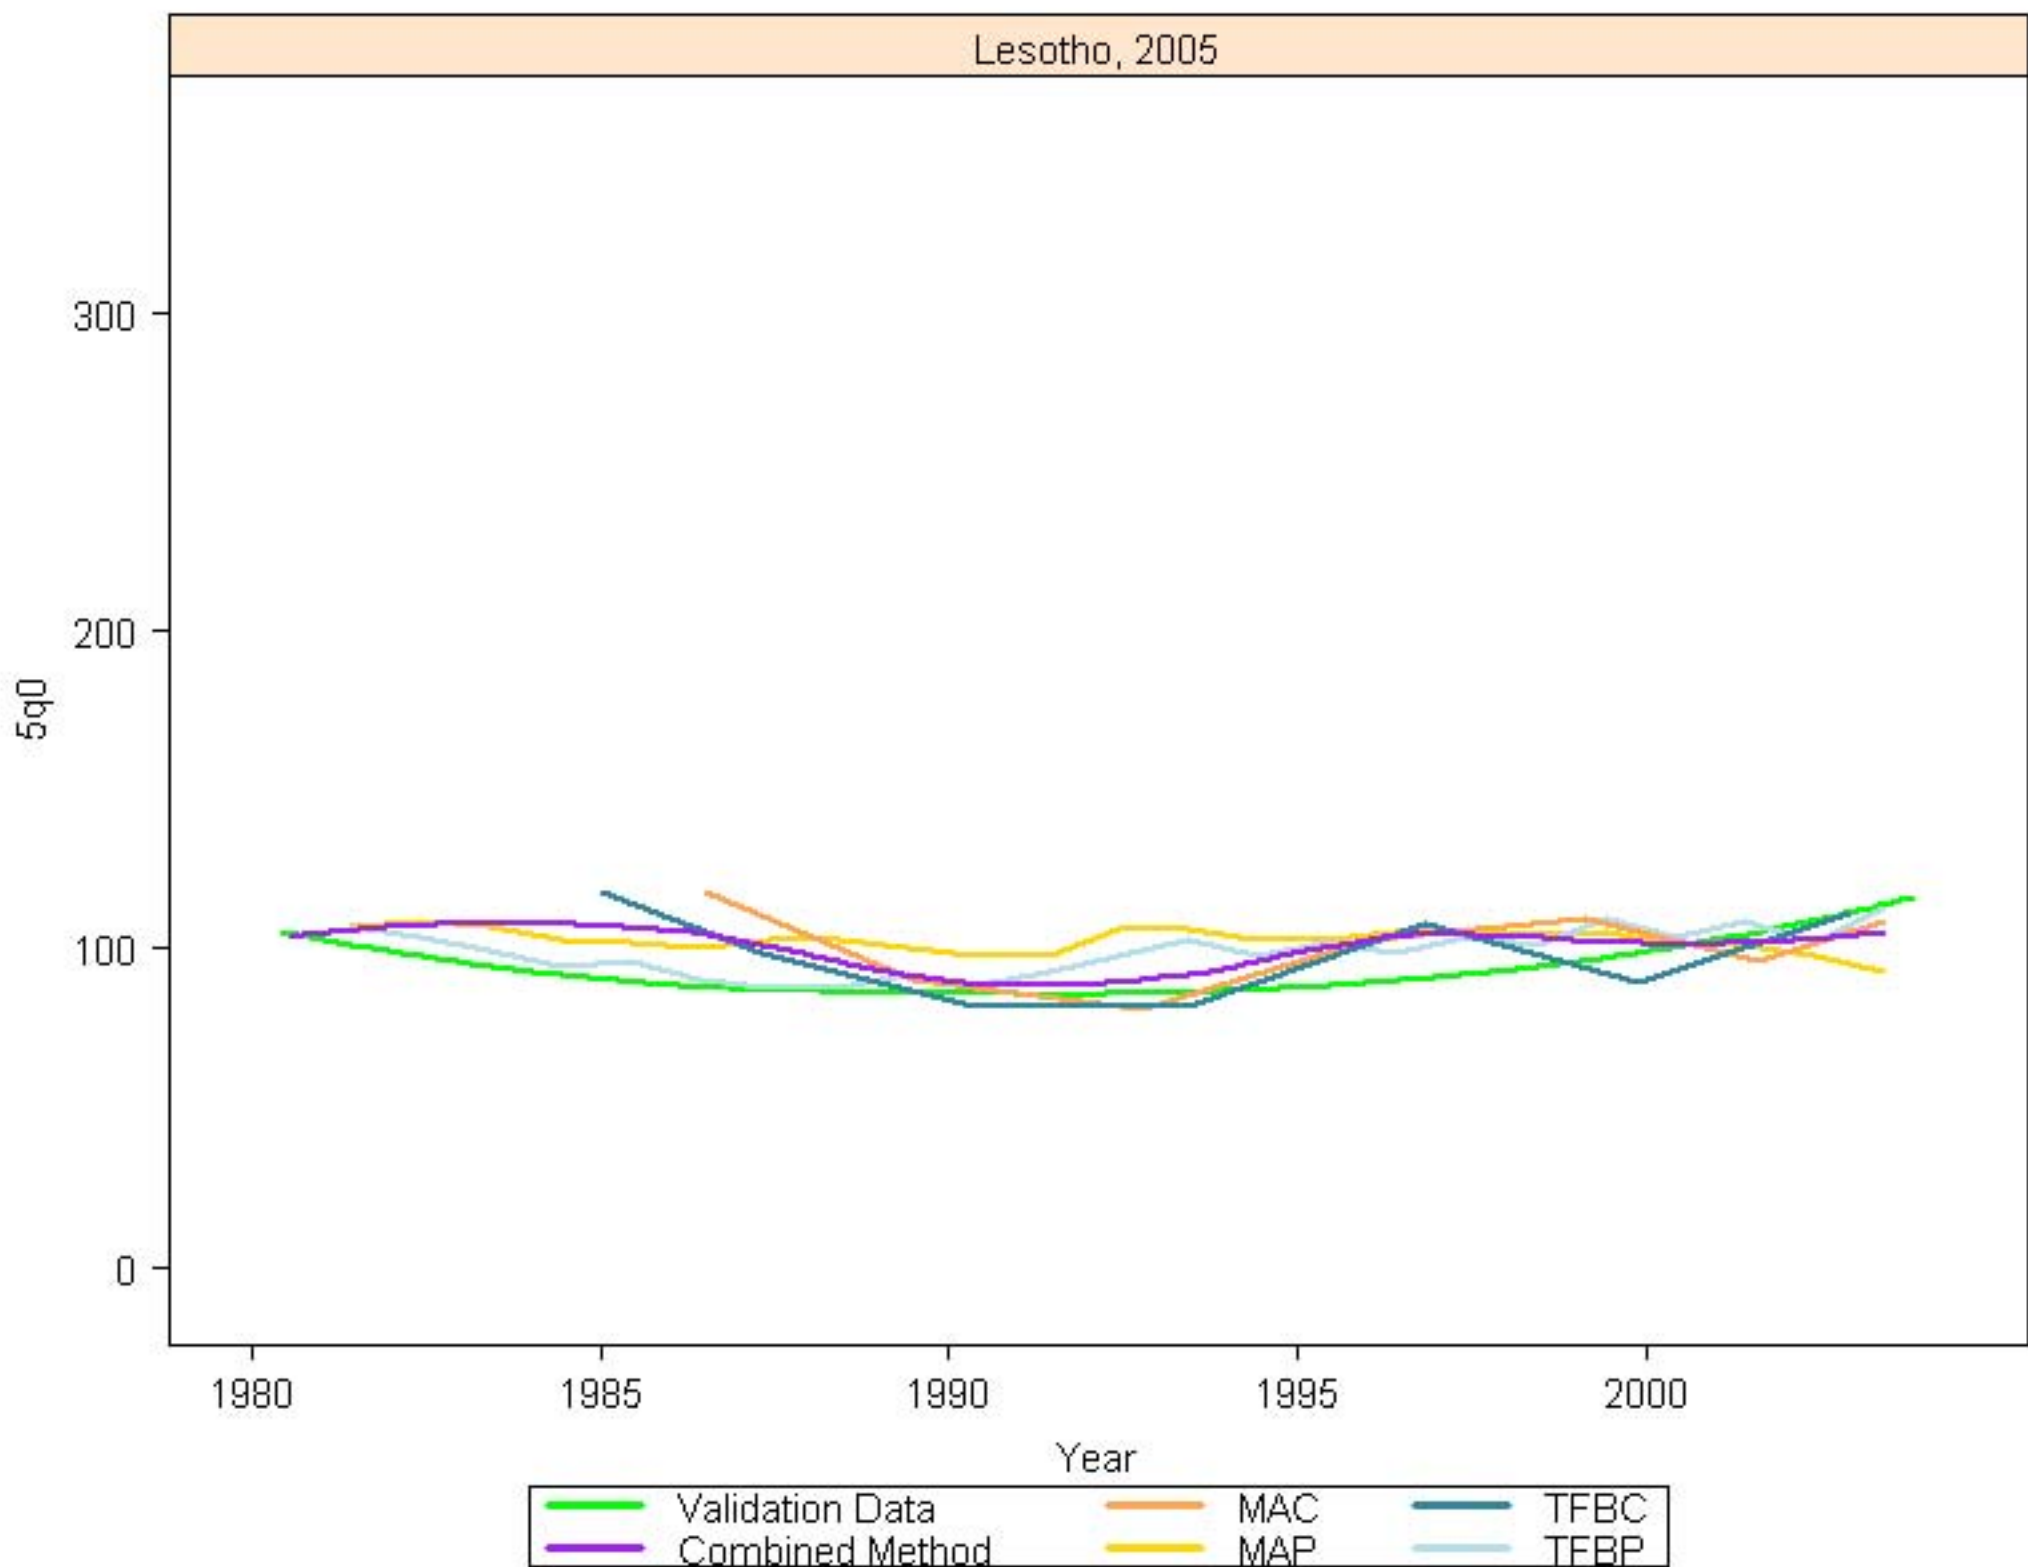

Liberia, 1986

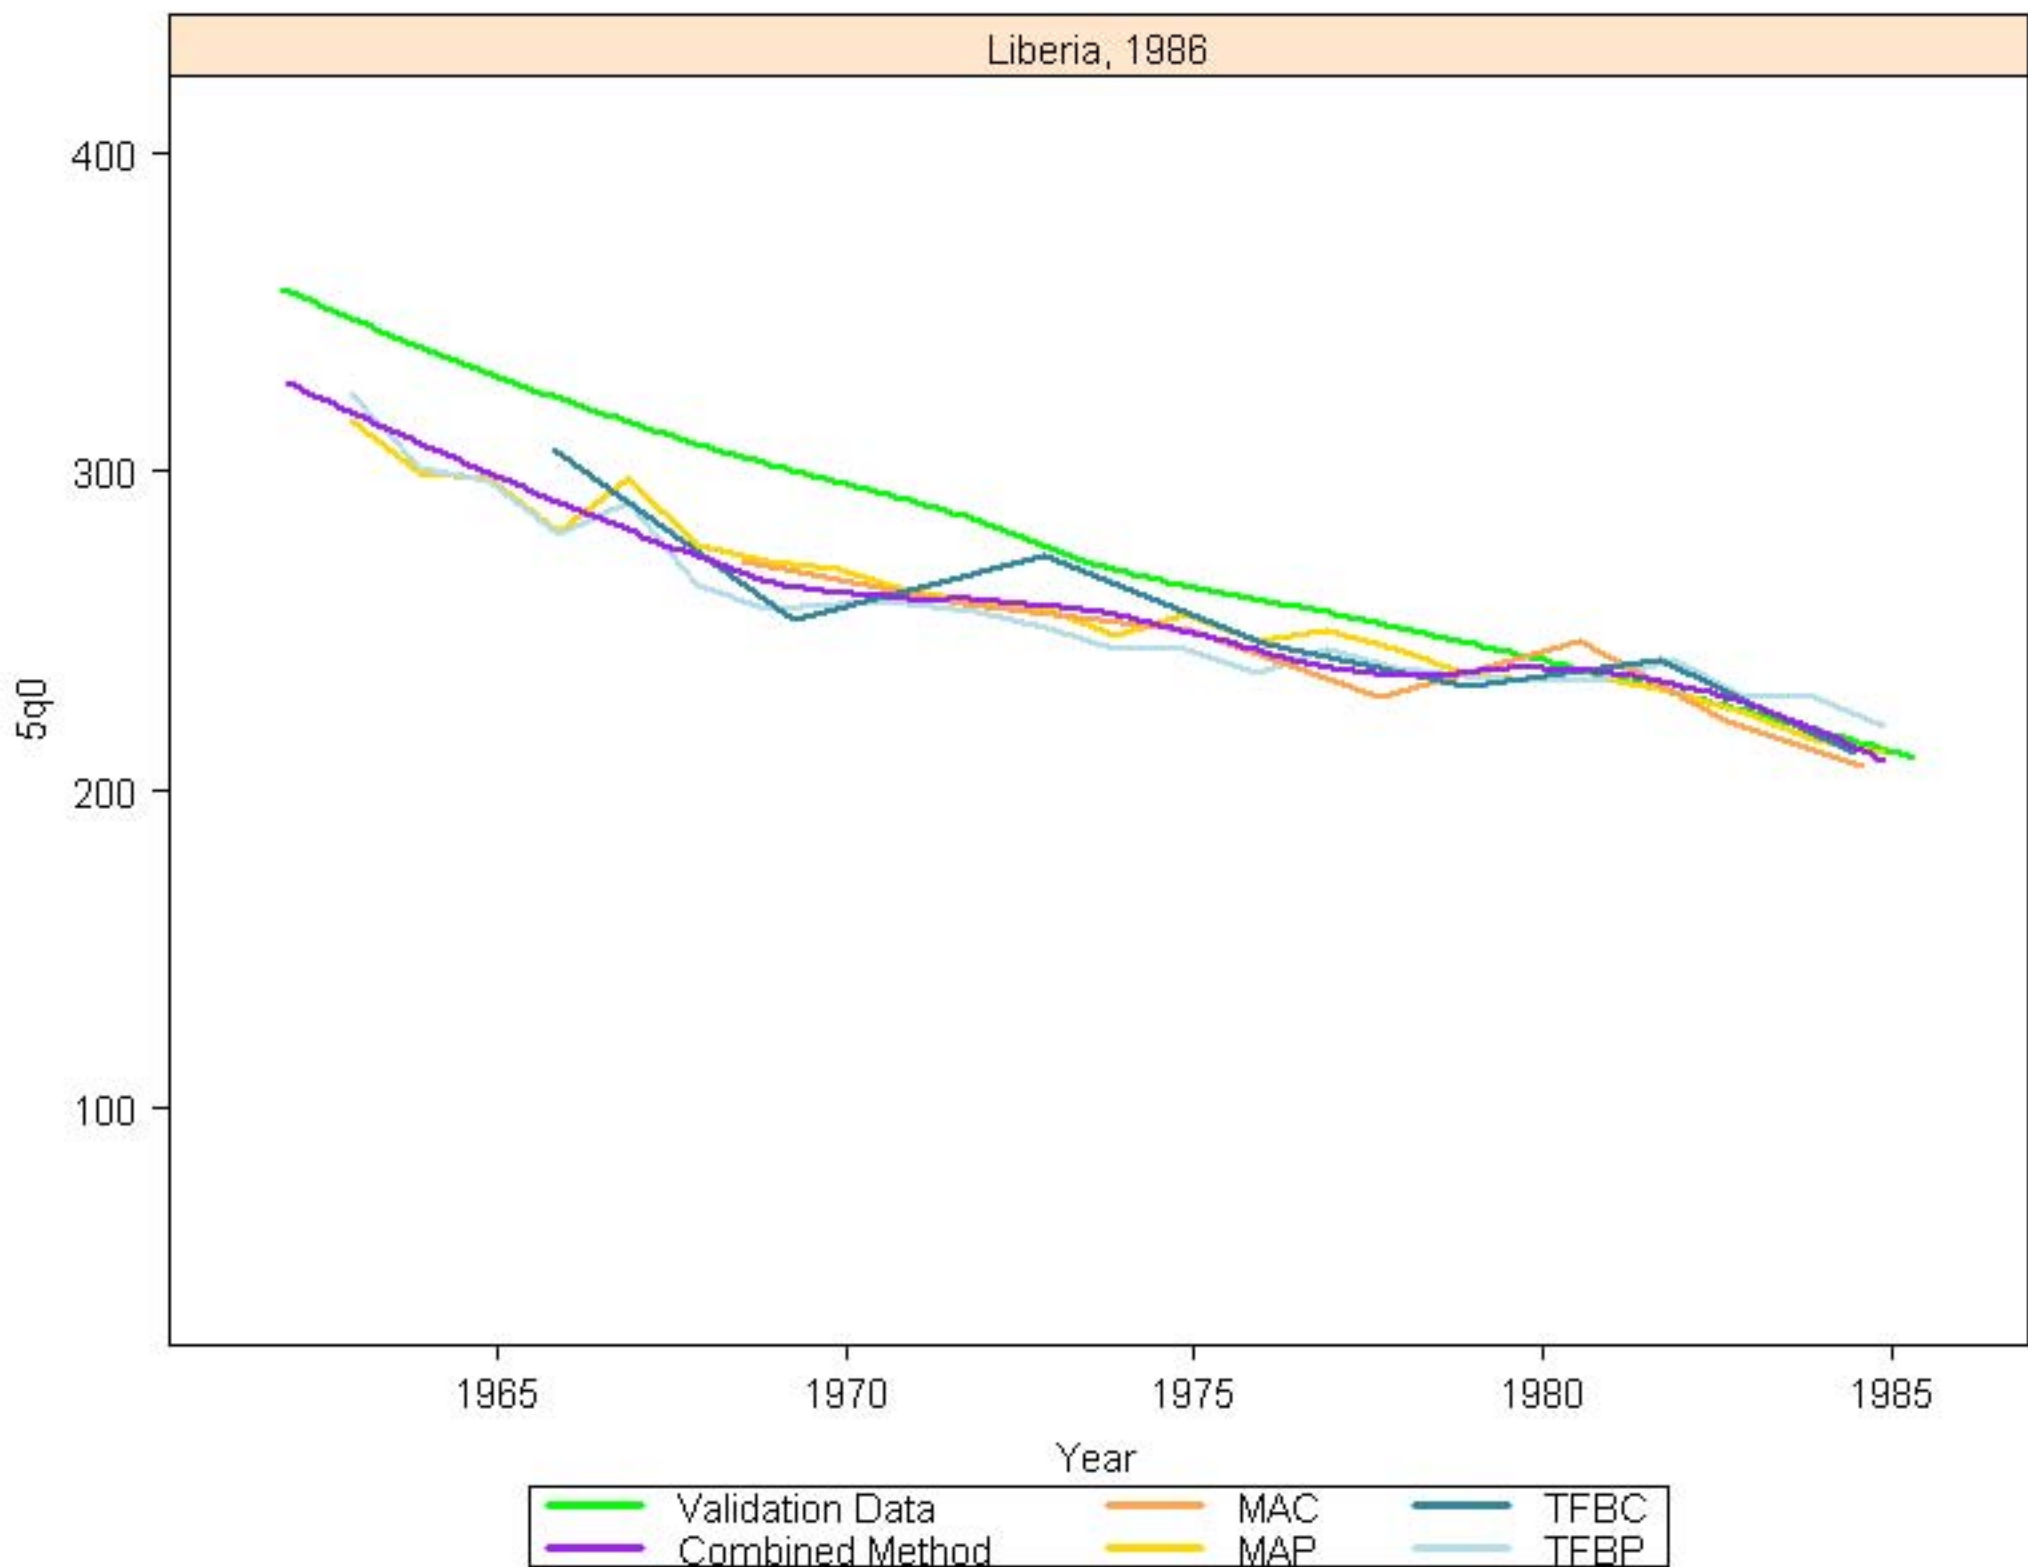



Madagascar, 1993

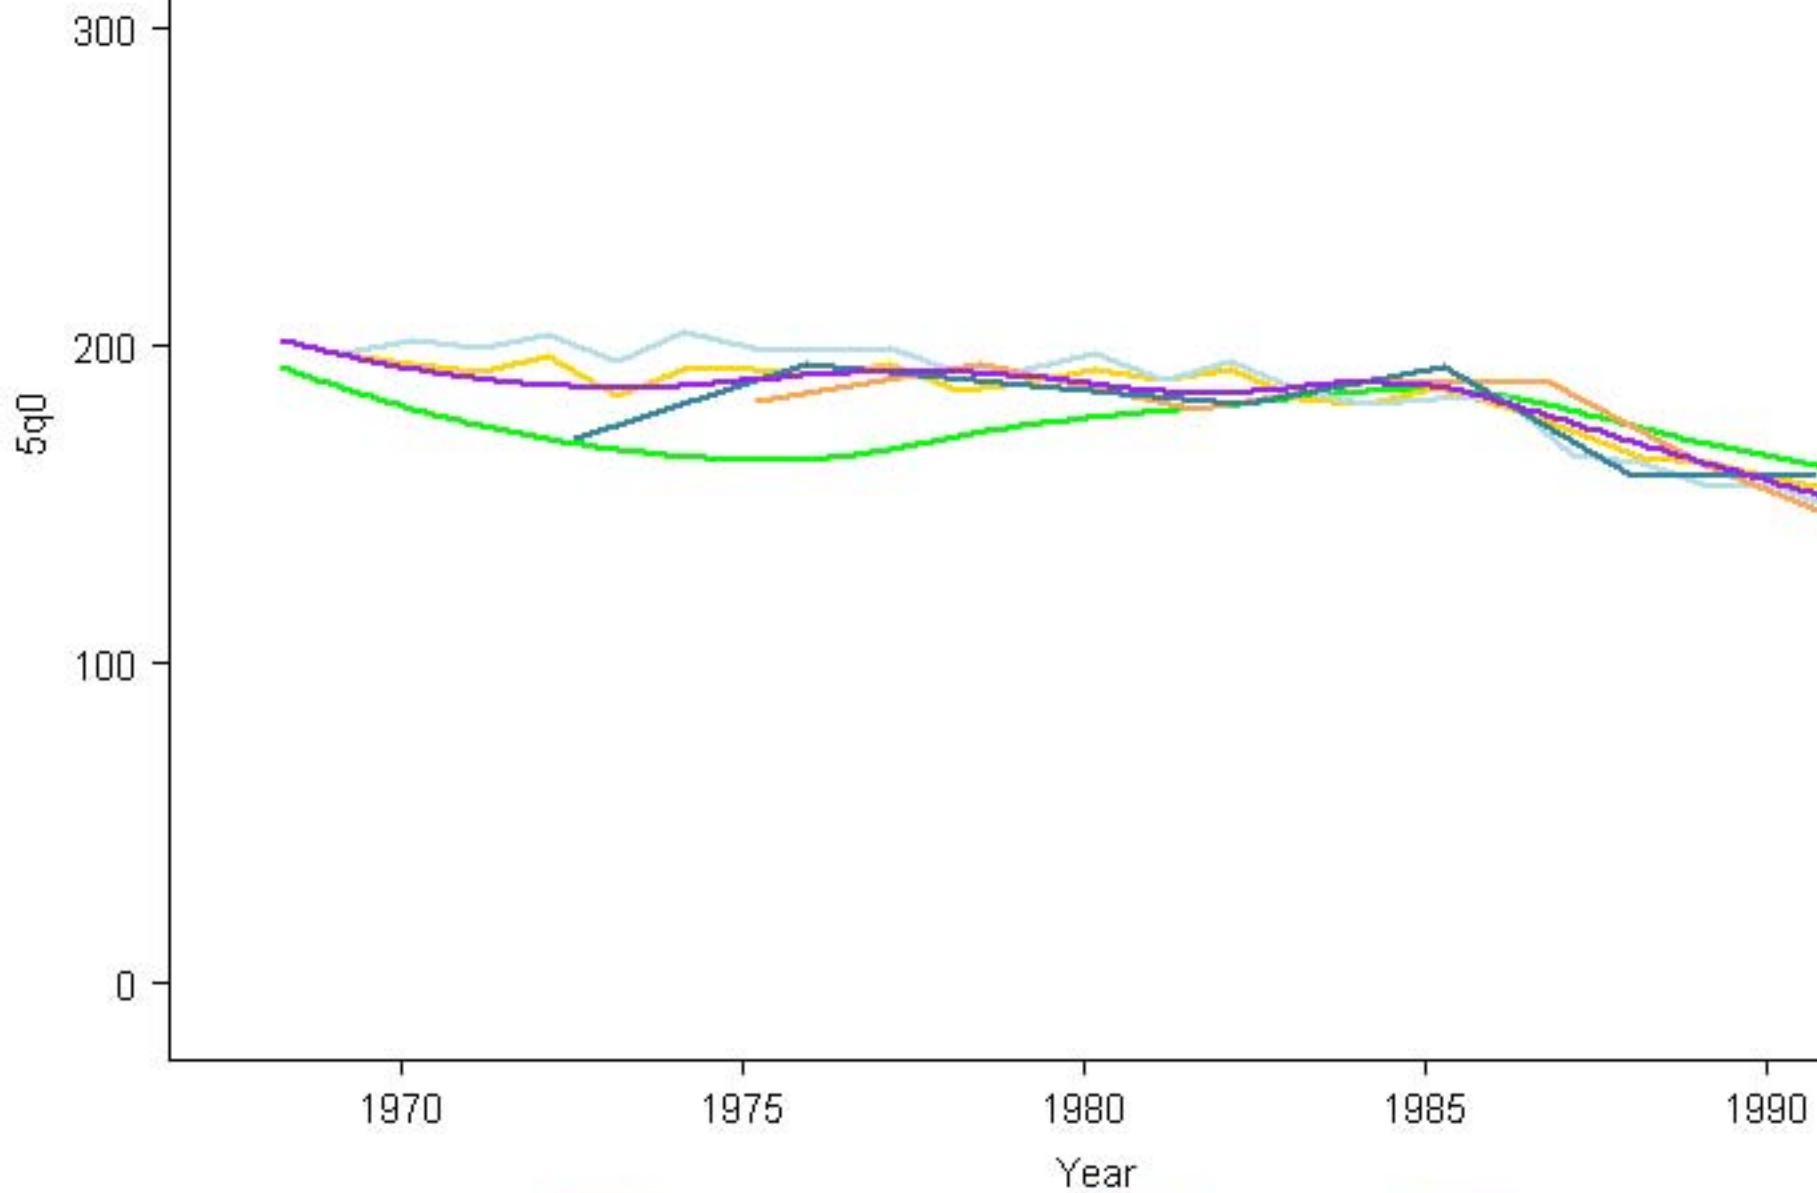

Madagascar, 1998

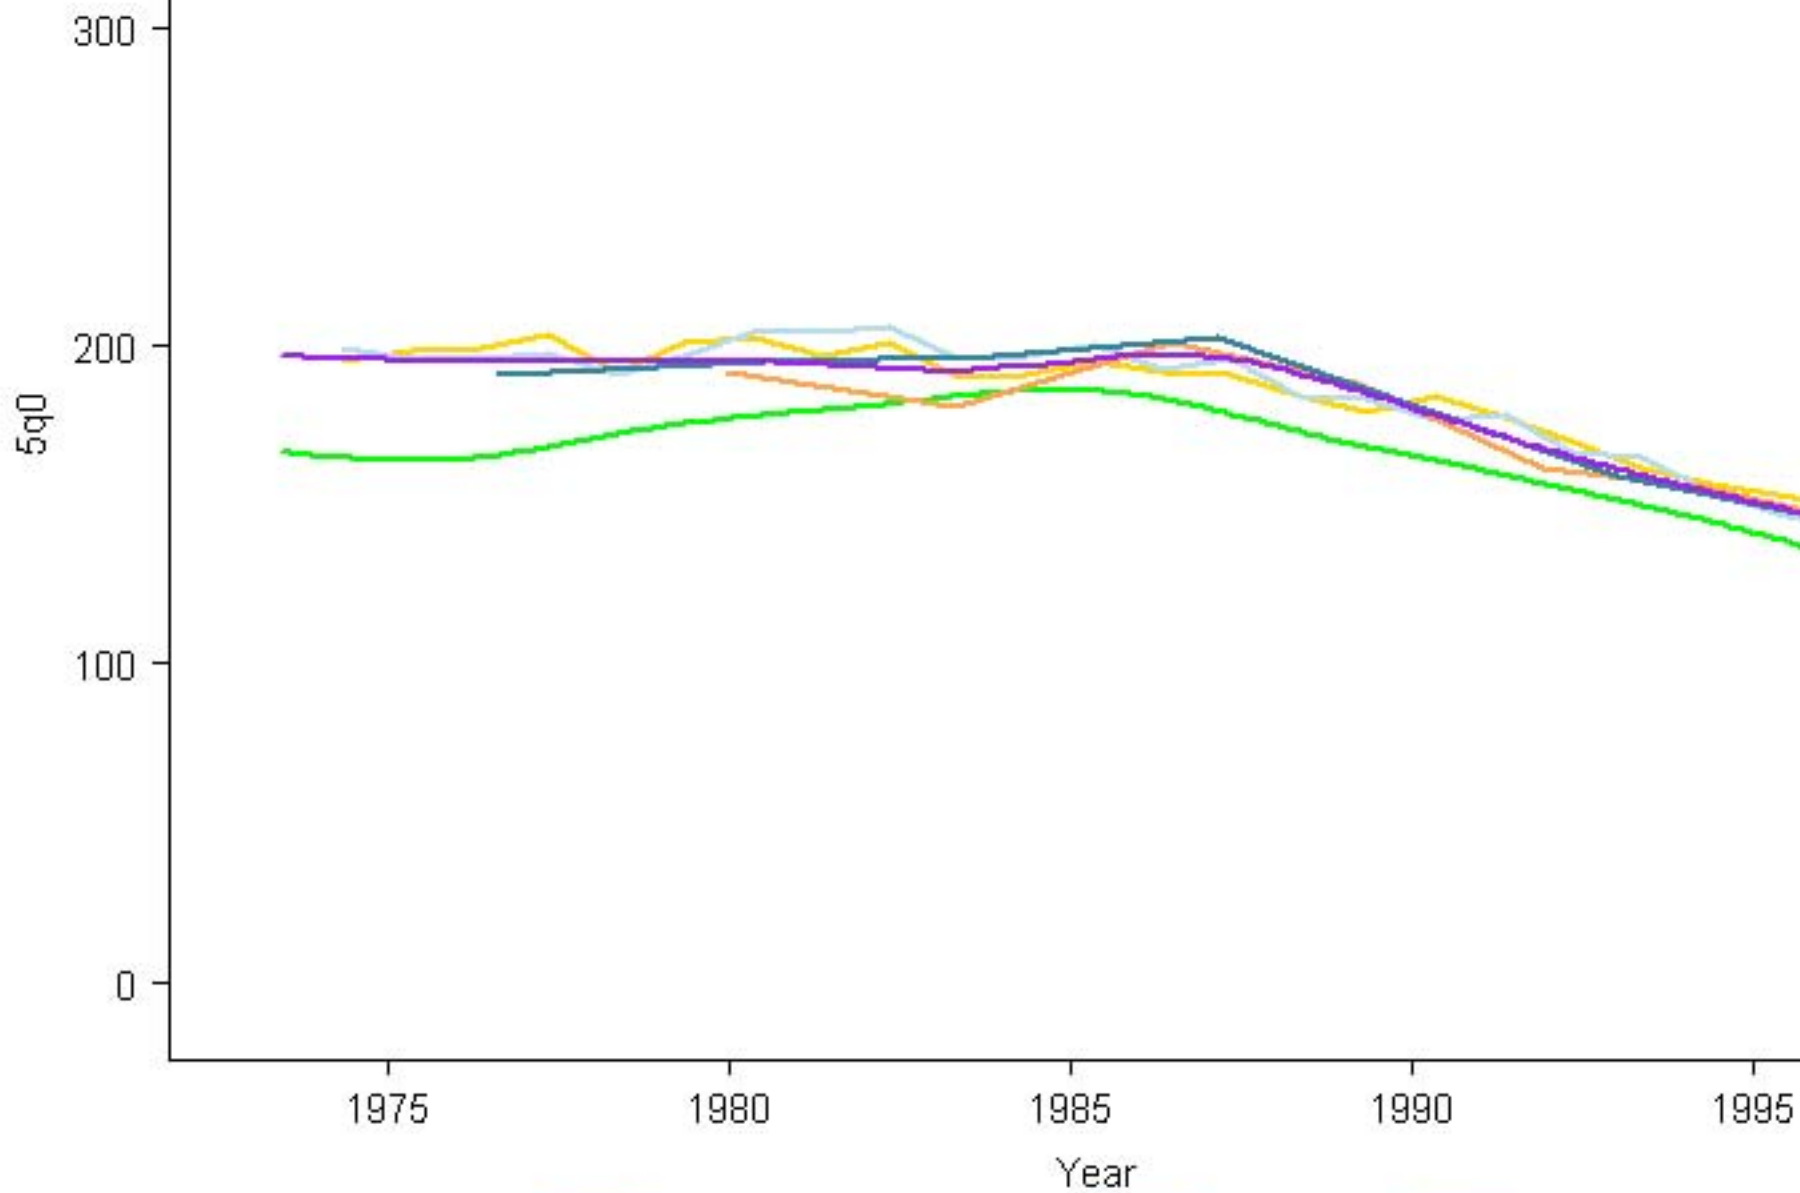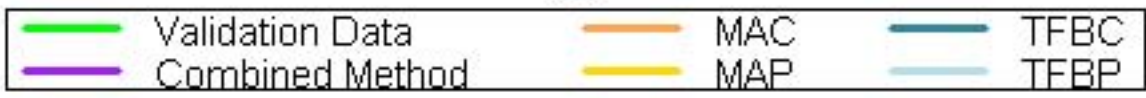

Madagascar, 2004

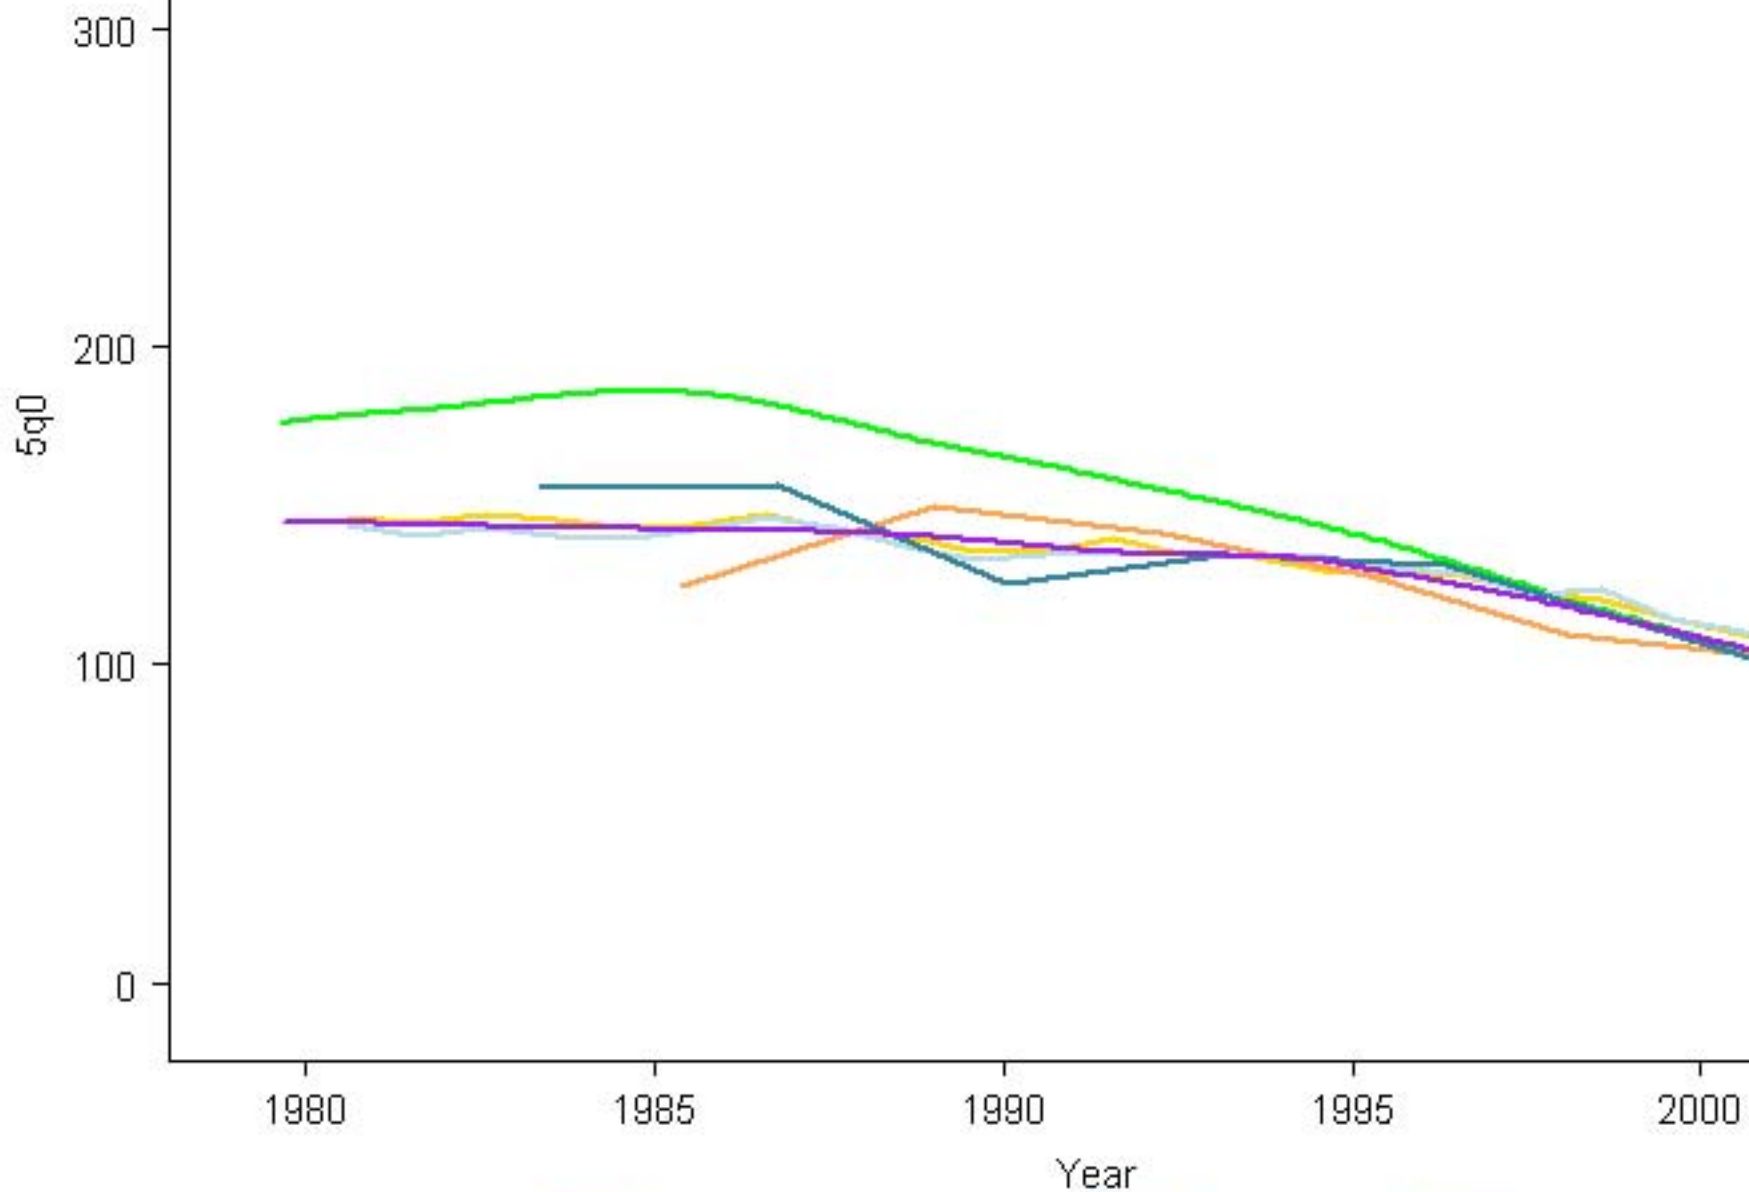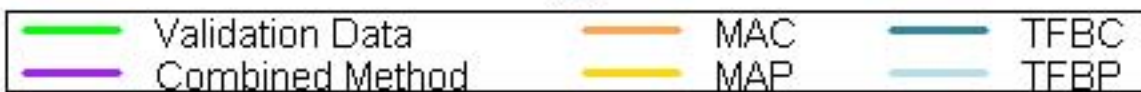

Malawi, 1993

5q0

400  
300  
200  
100

1970 1975 1980 1985 1990

Year

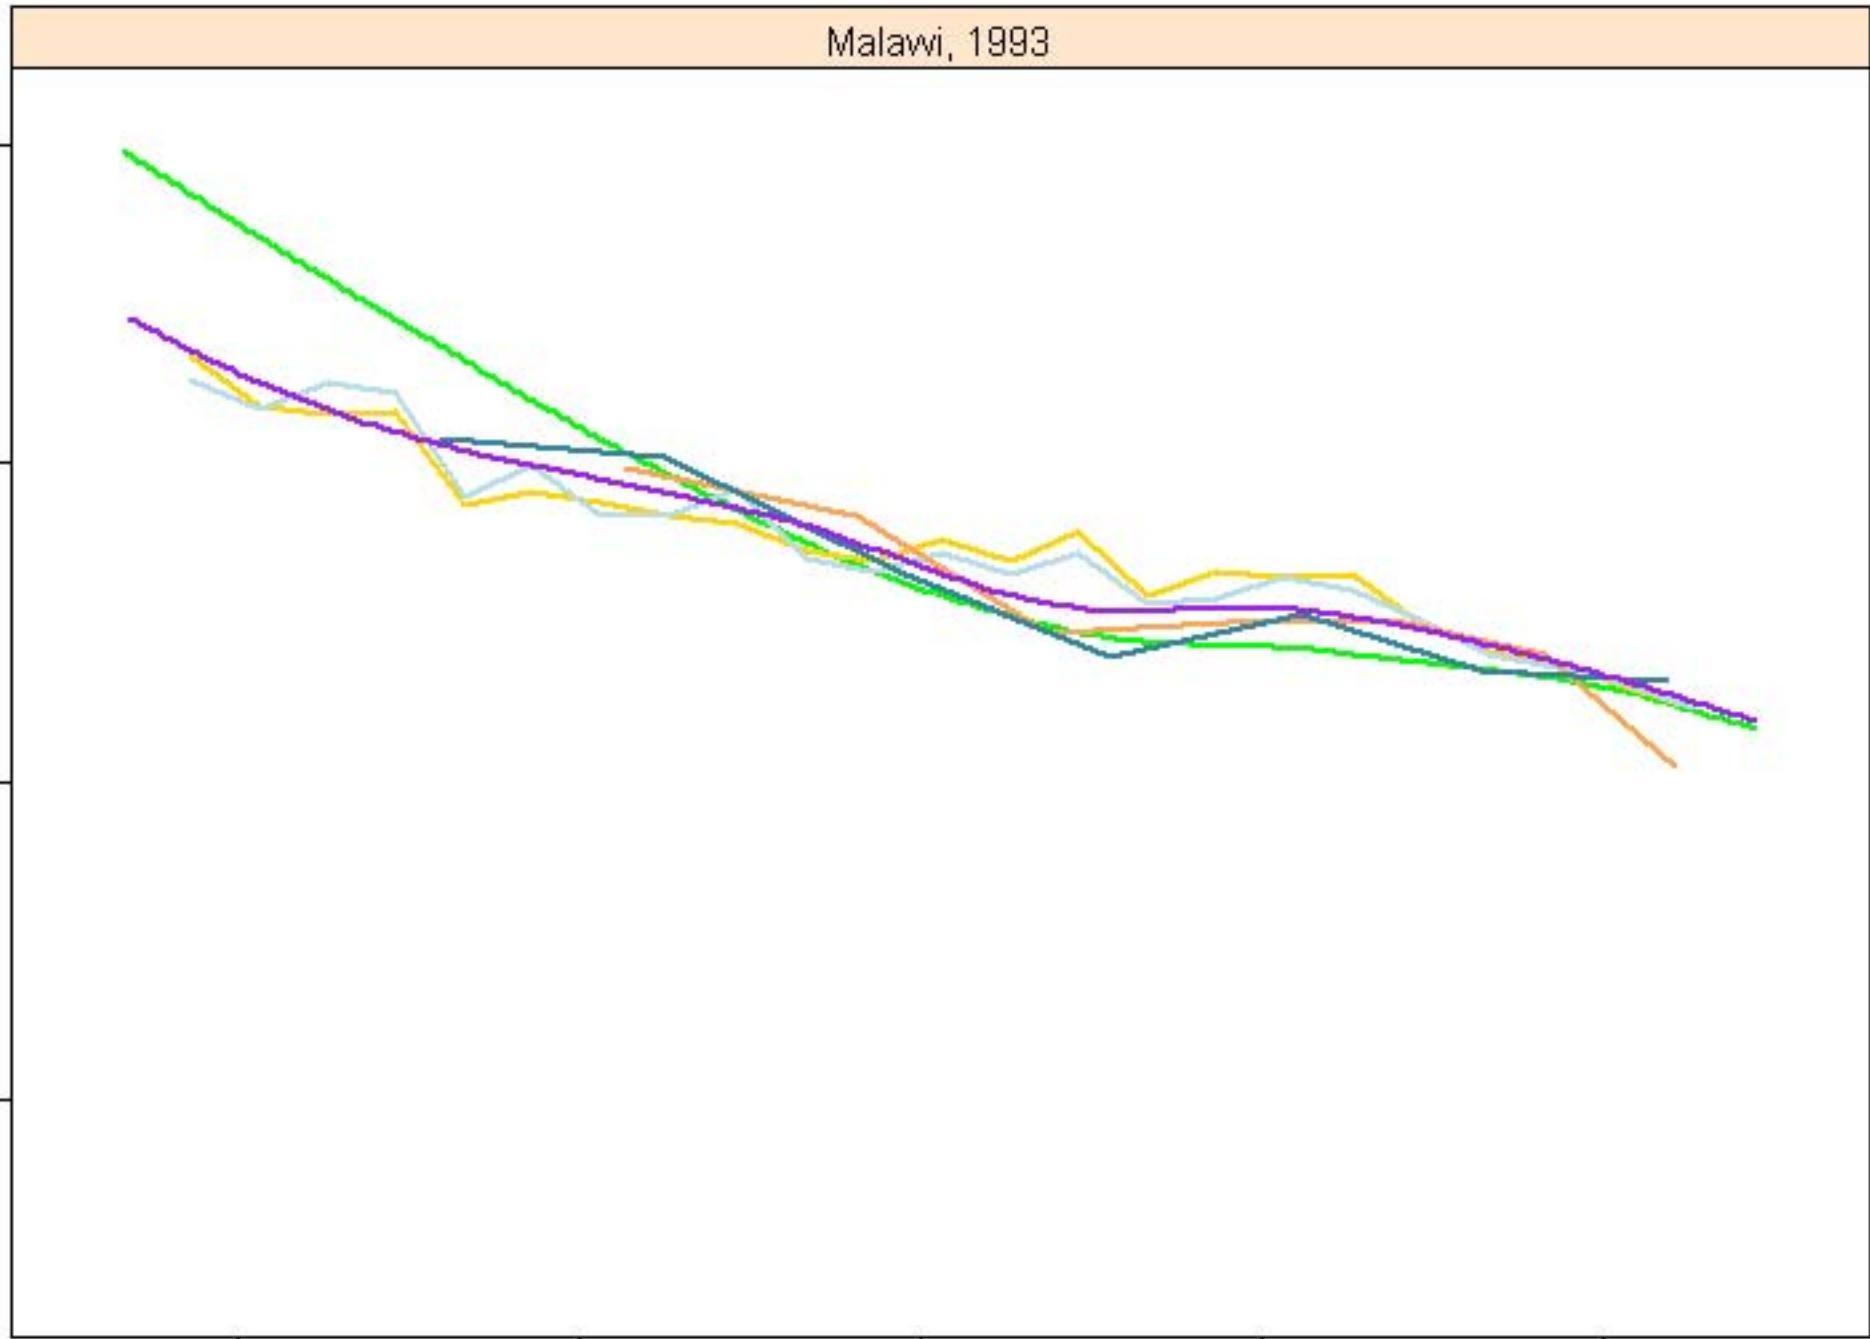

Malawi, 2001

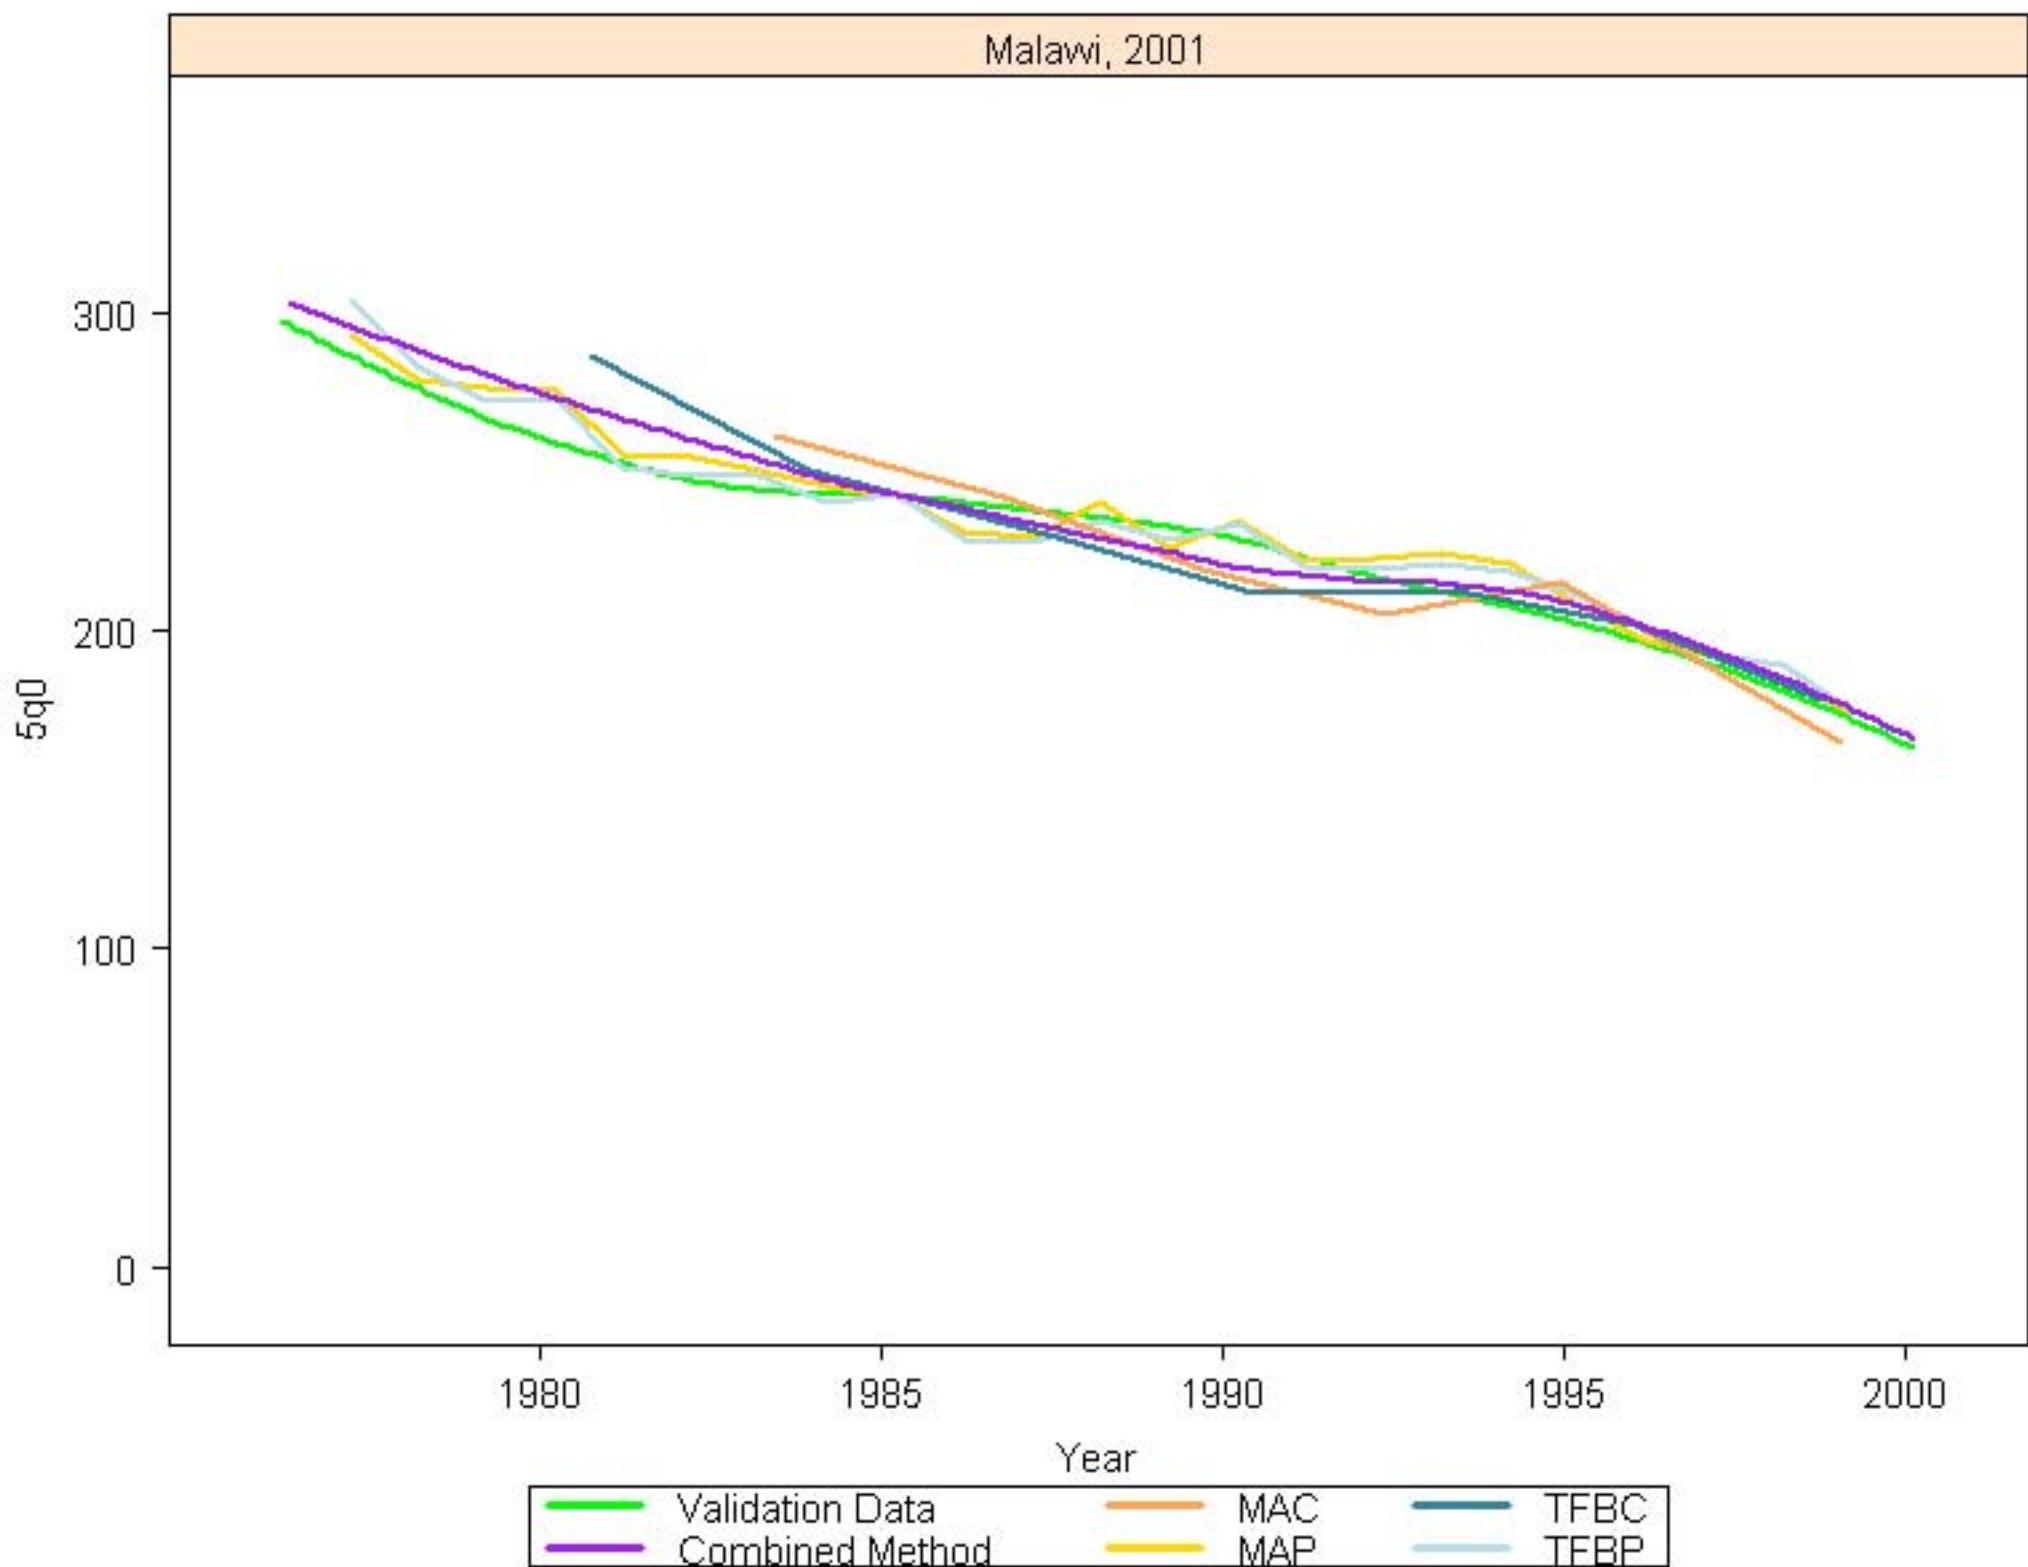

Malawi, 2005

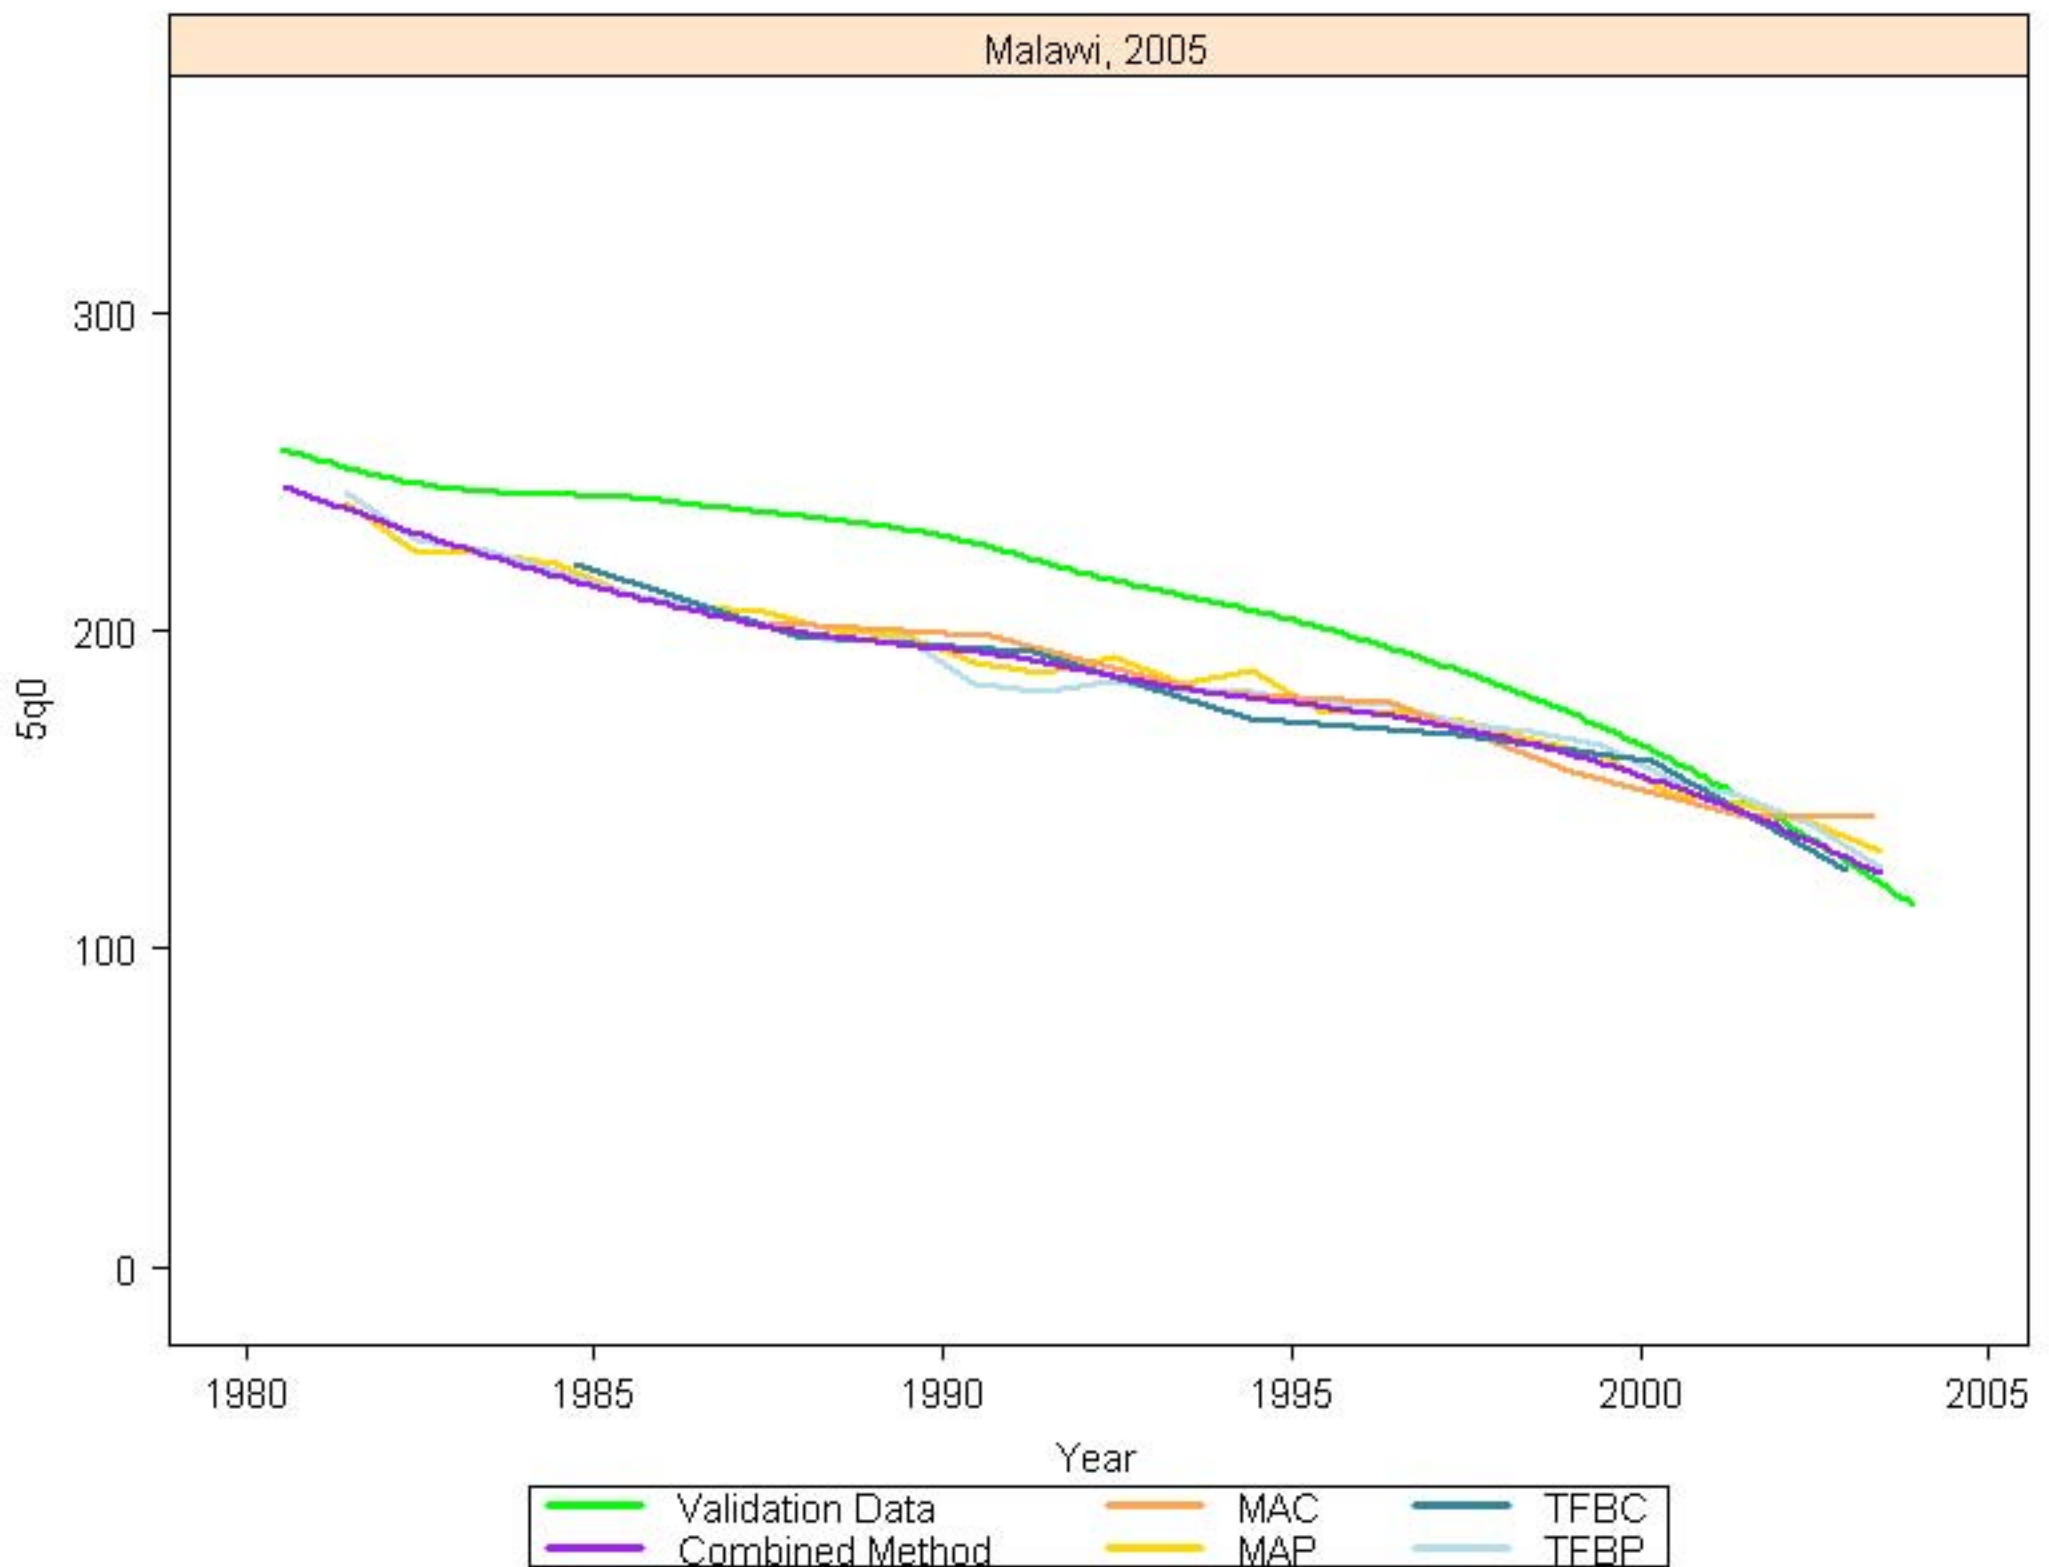

Mali, 1987

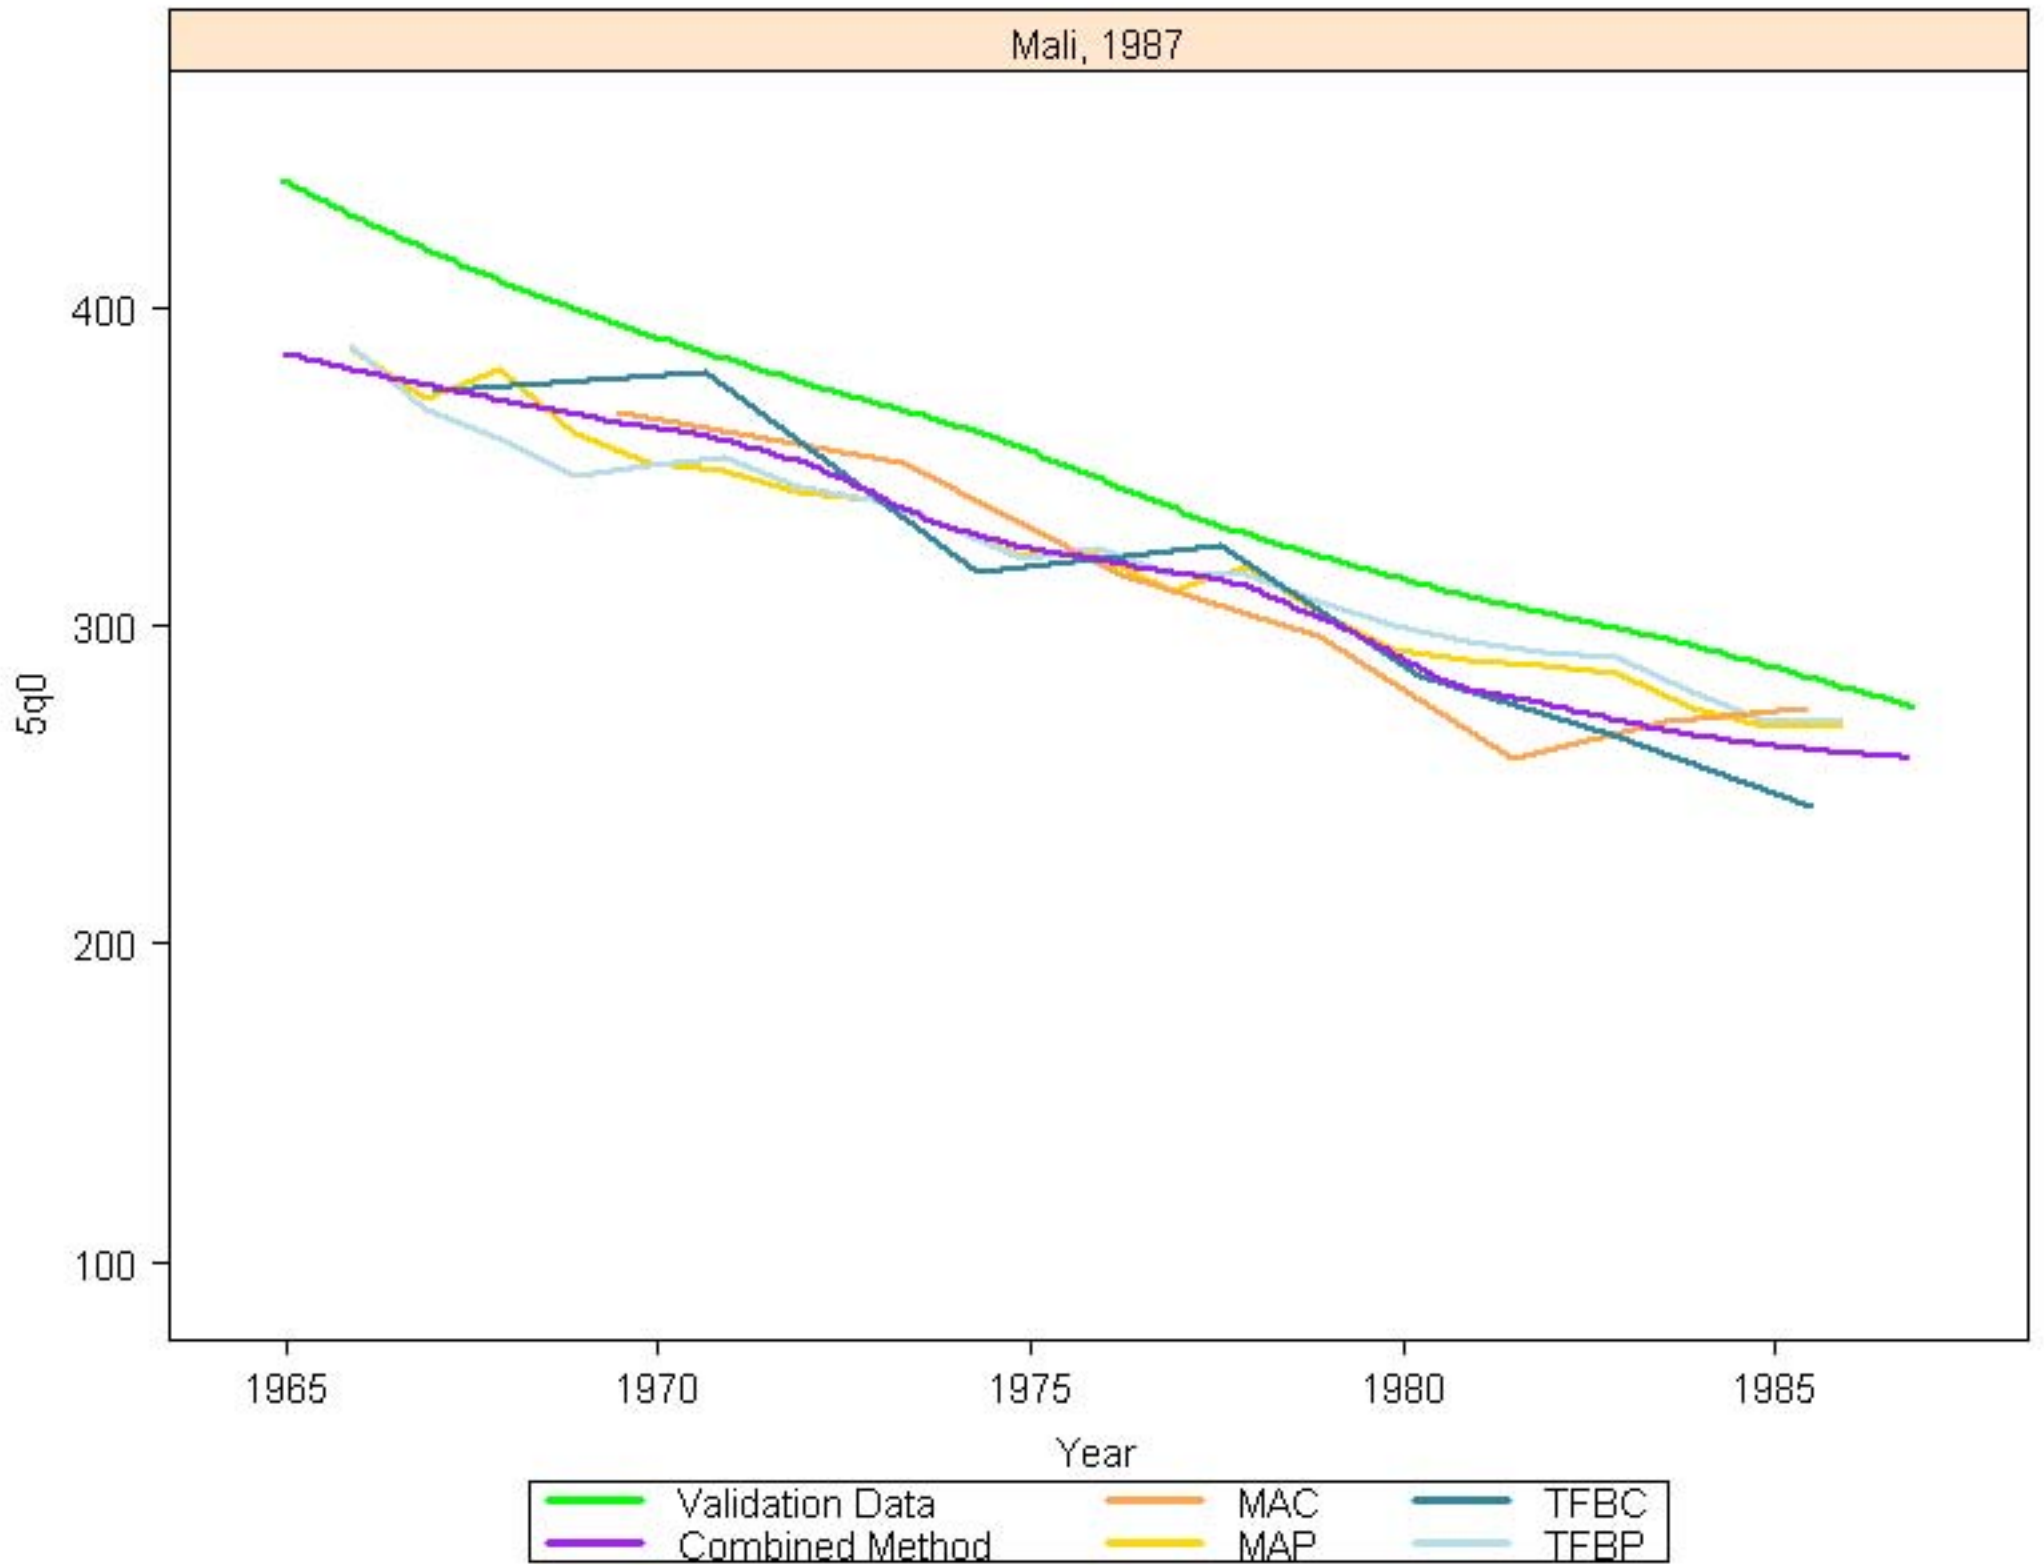

Mali, 1996

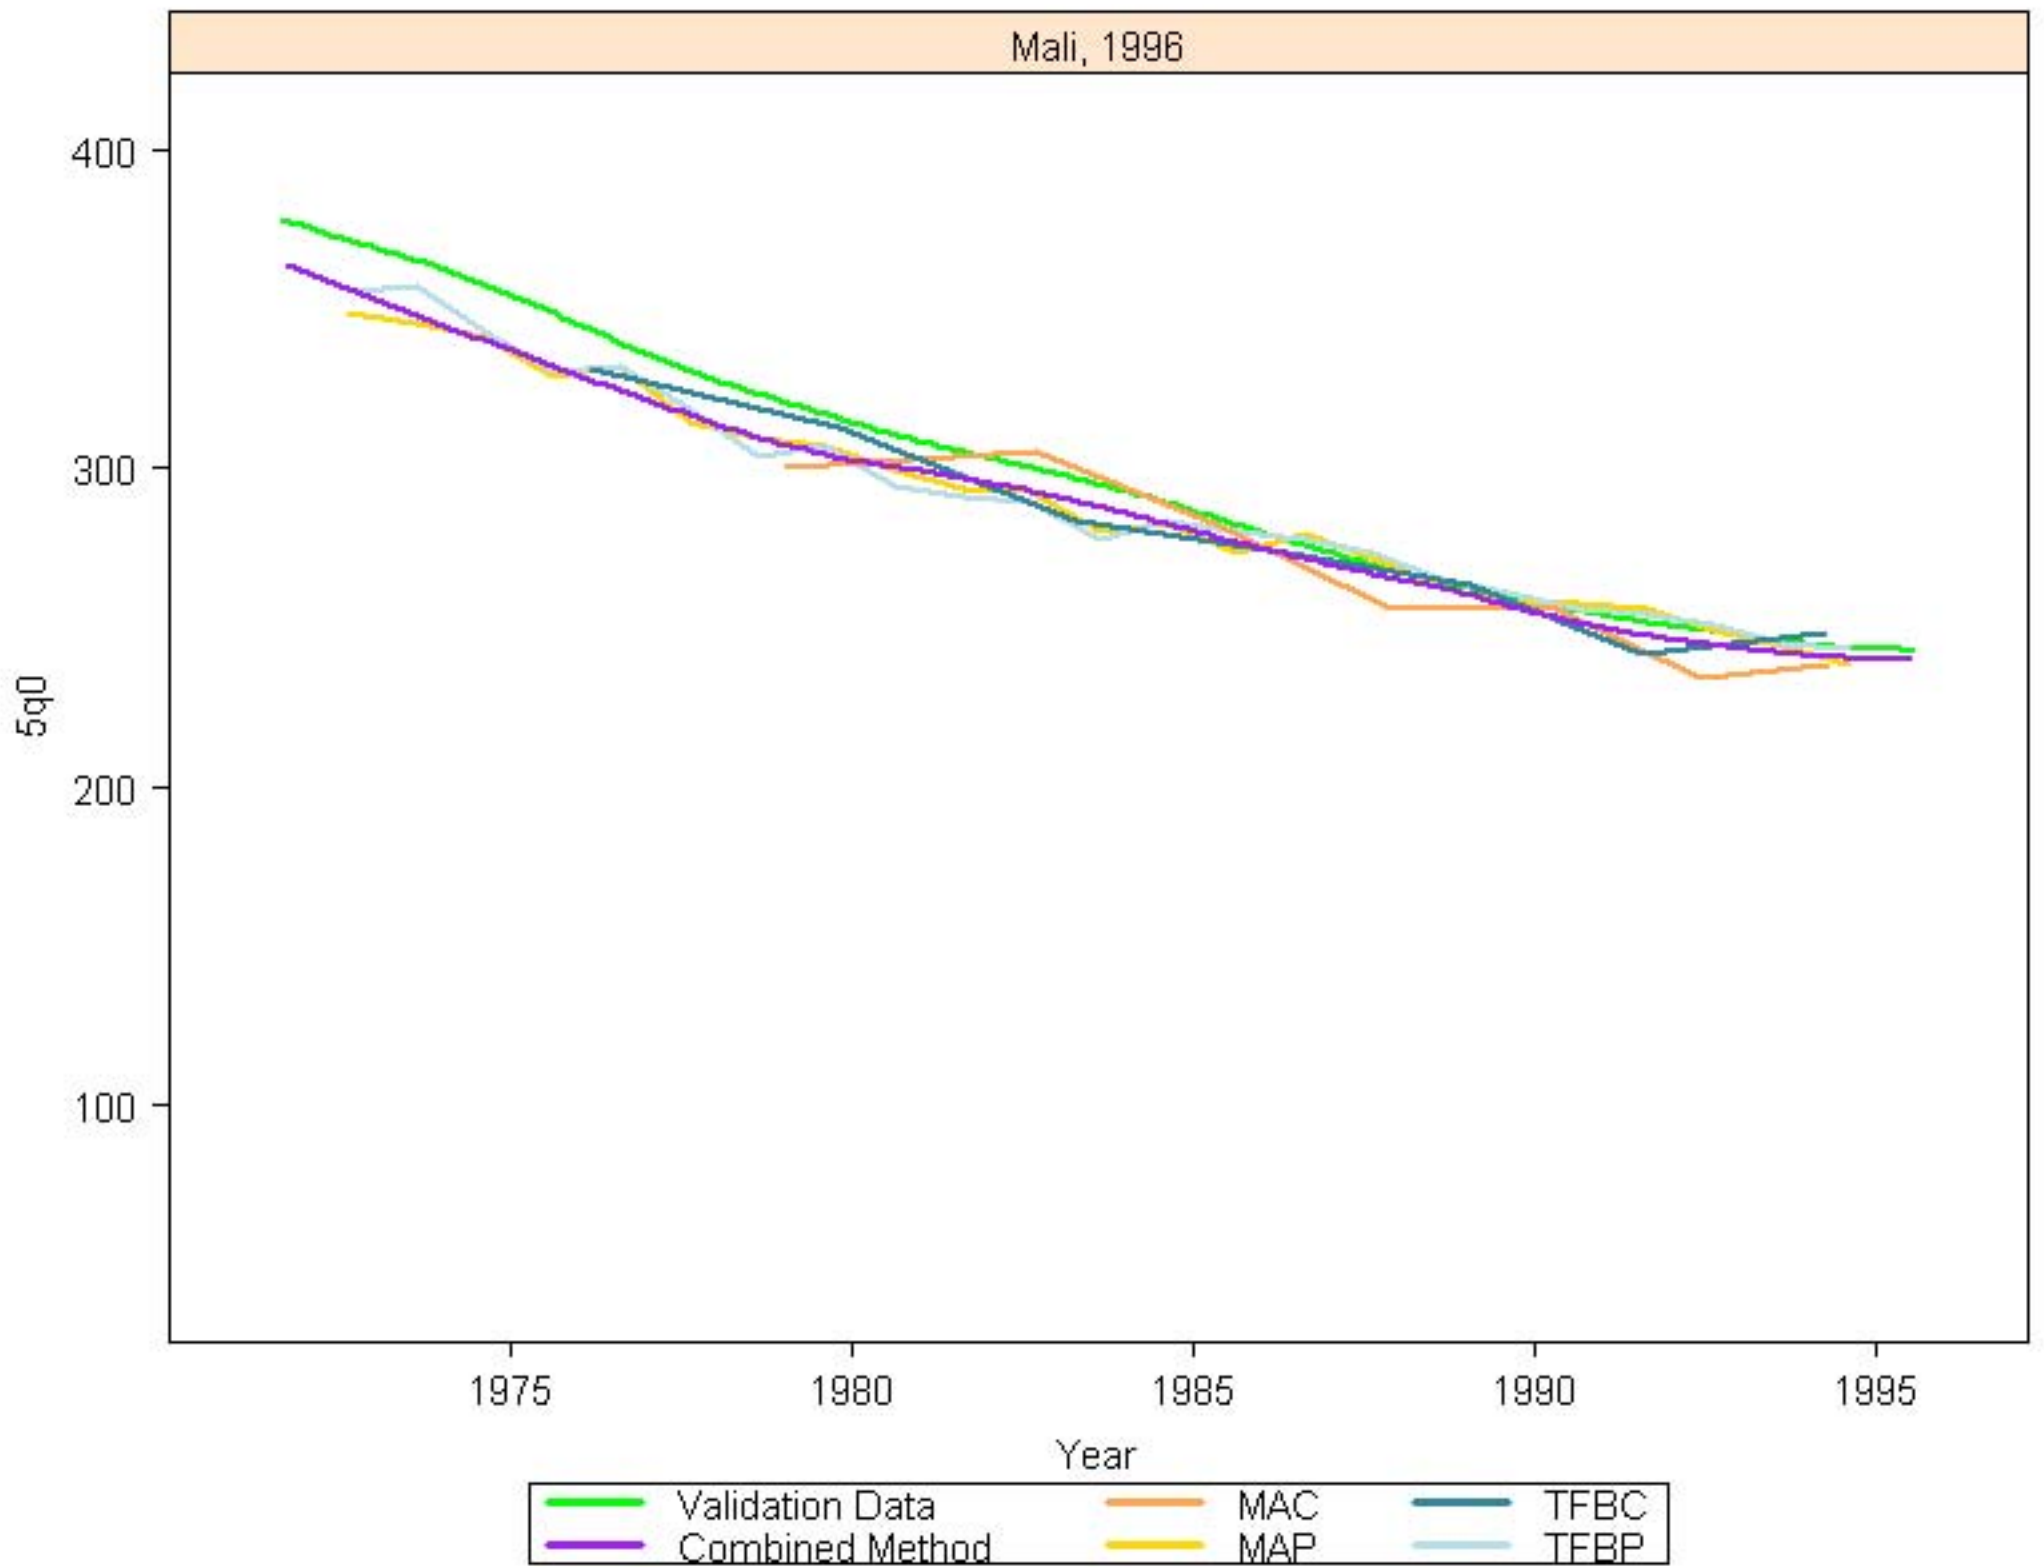



Mali, 2001

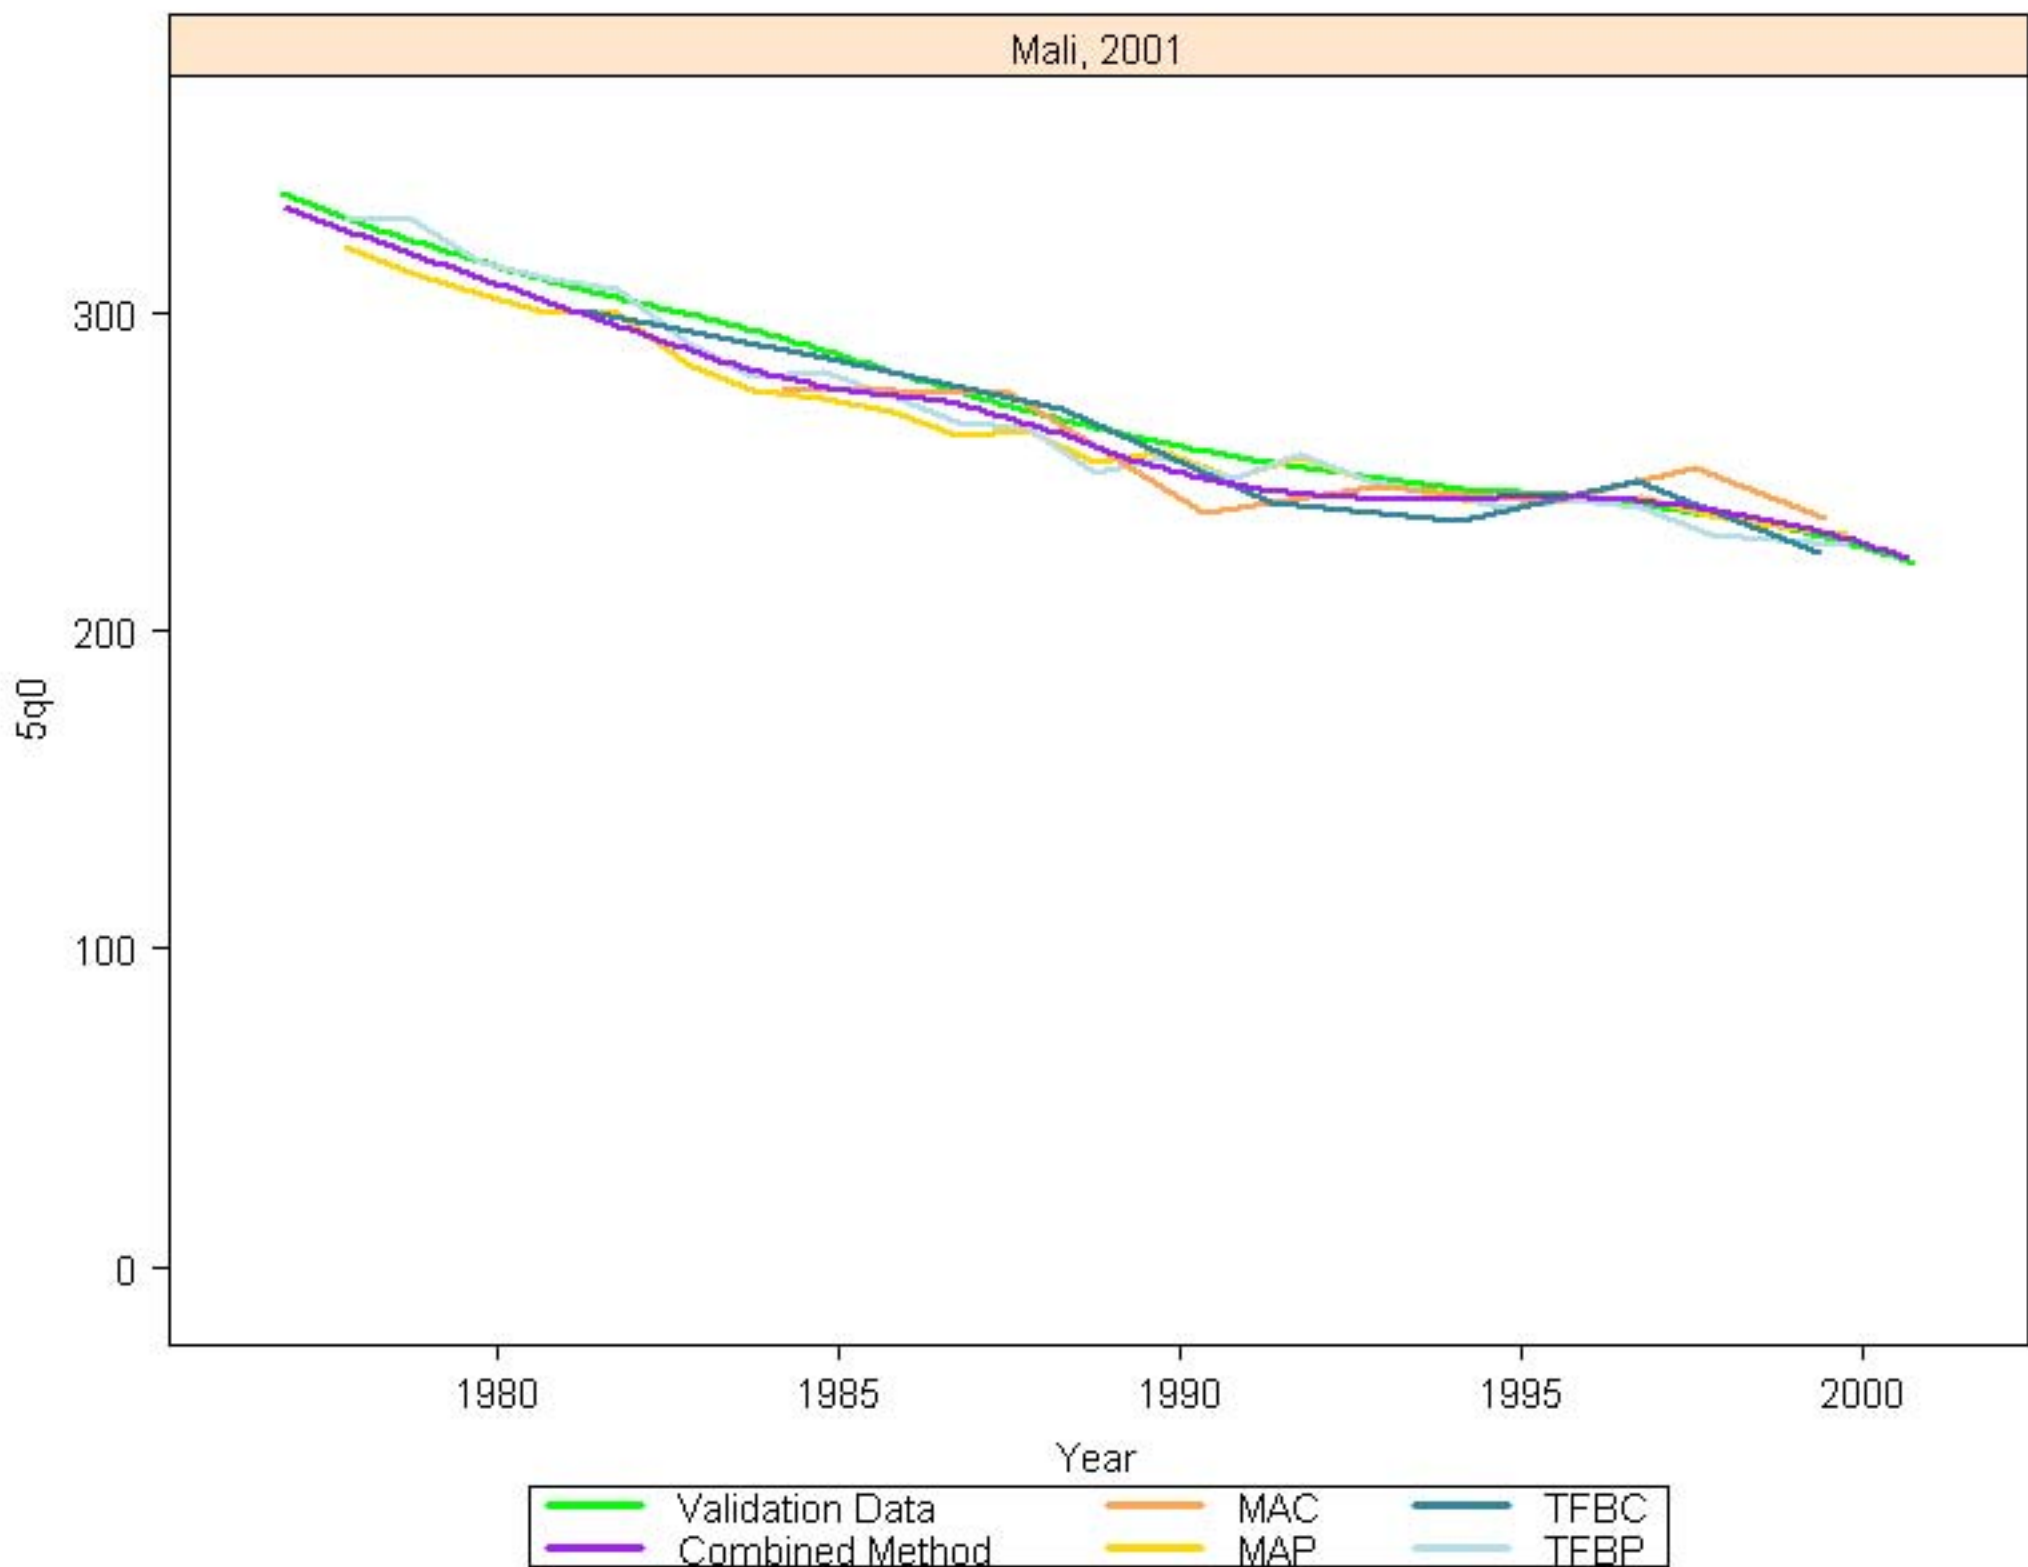

Mali, 2007

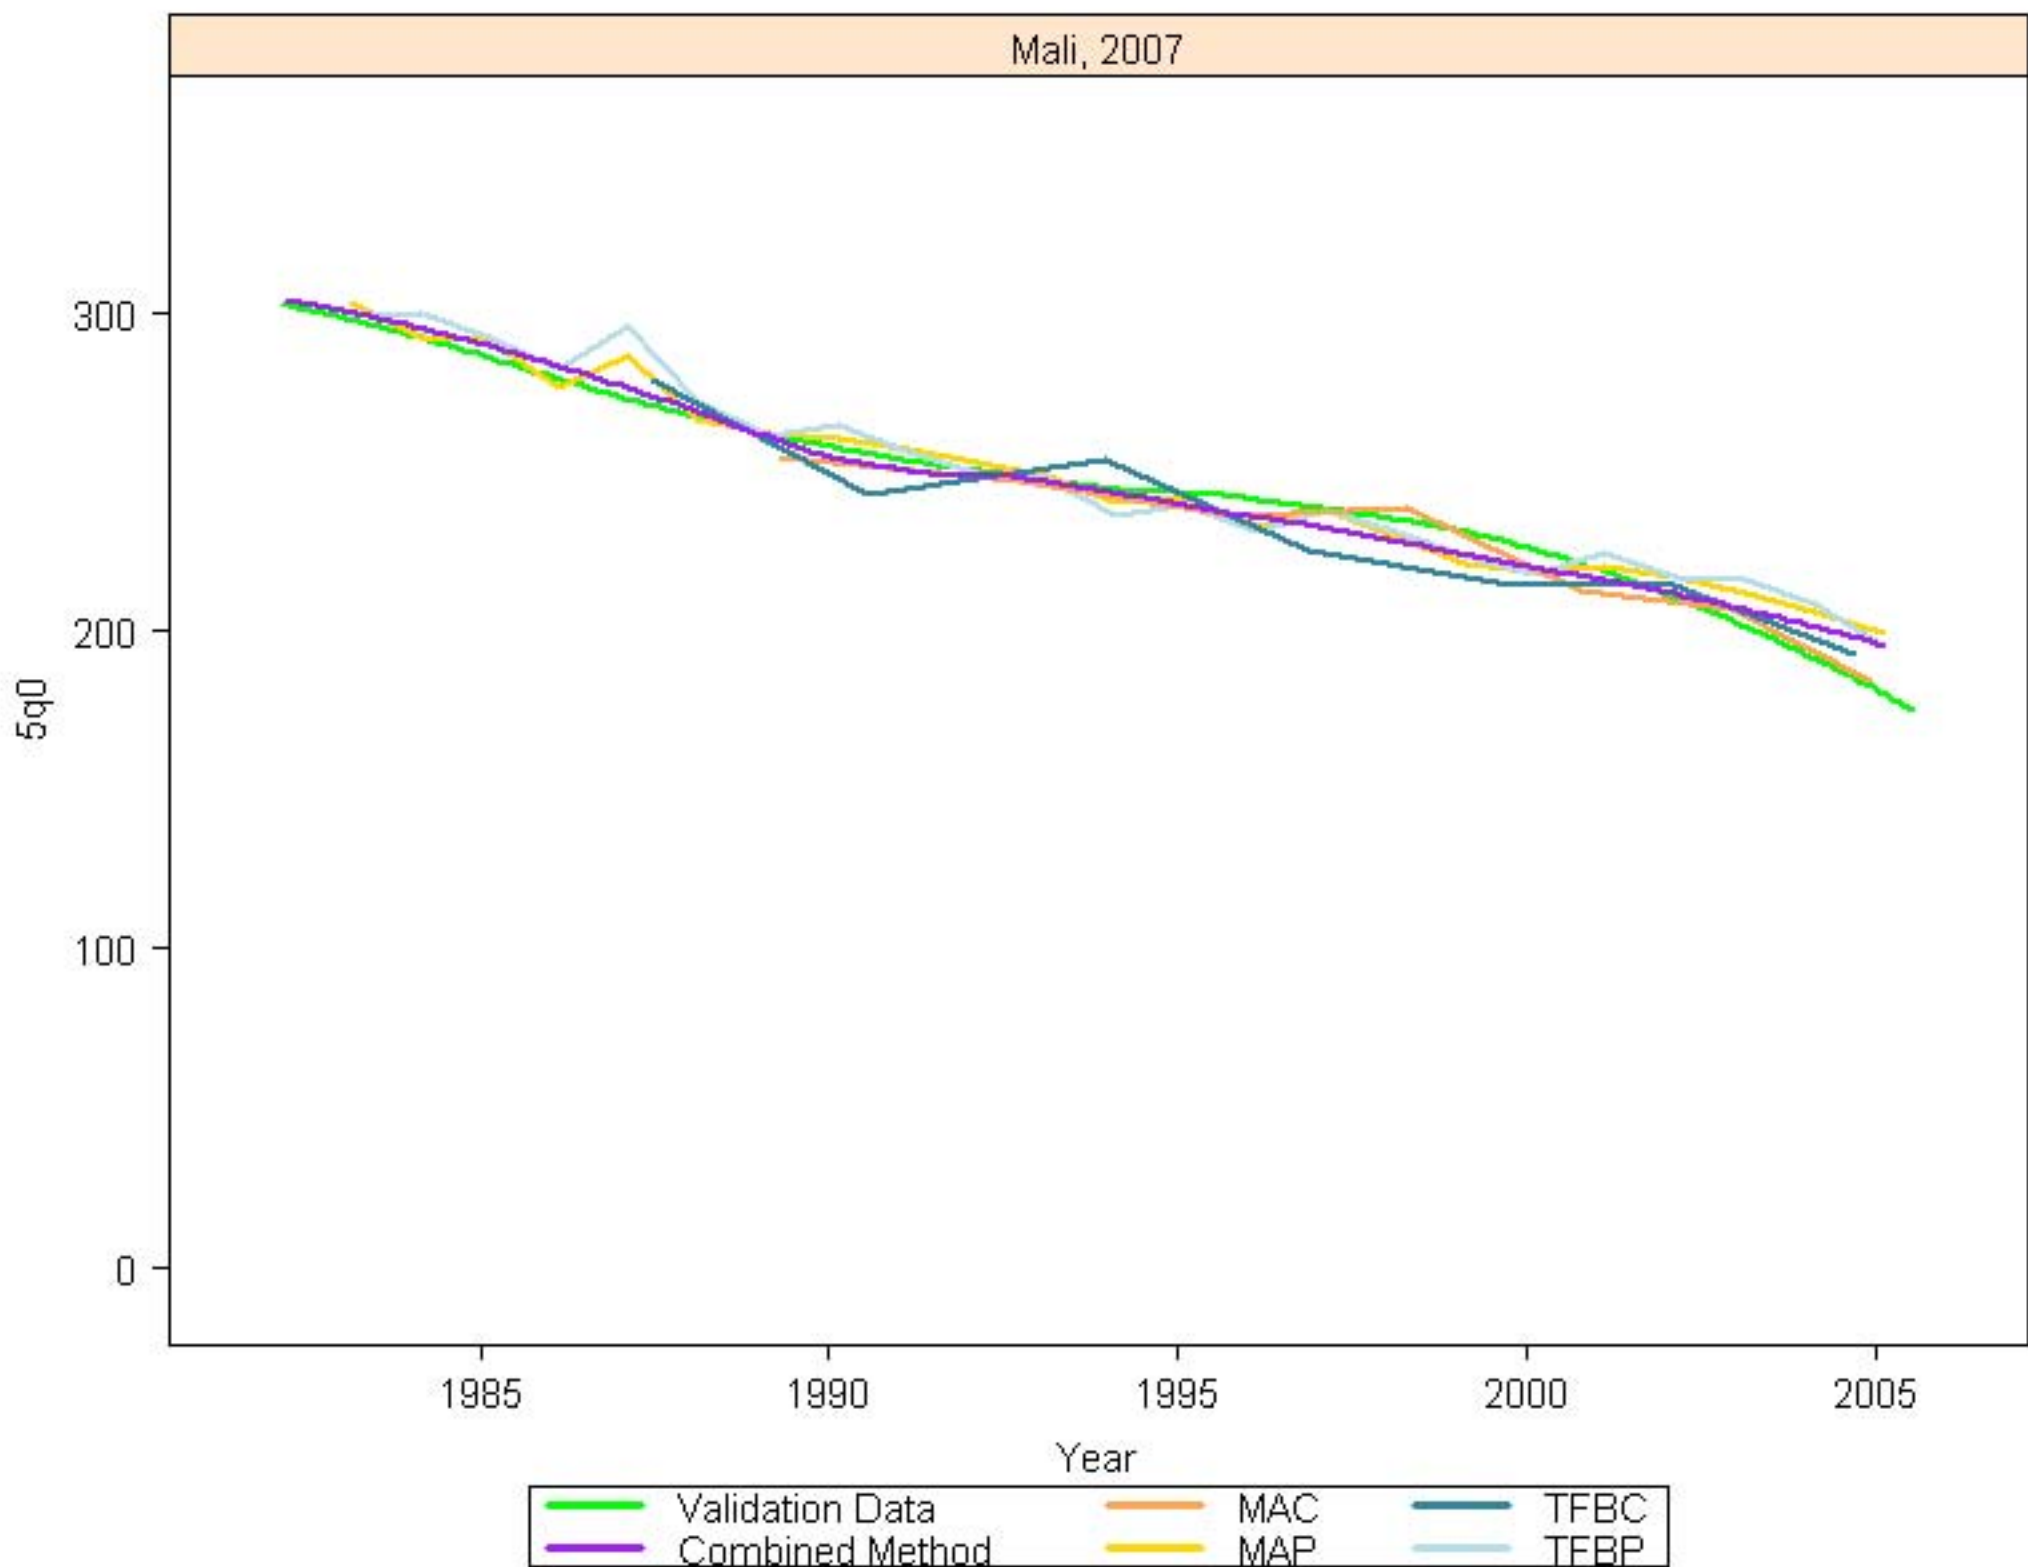

Mauritania, 2001

5q0

300  
200  
100  
0

1980 1985 1990 1995 2000

Year

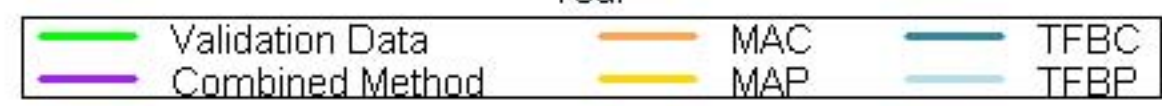

Mexico, 1987

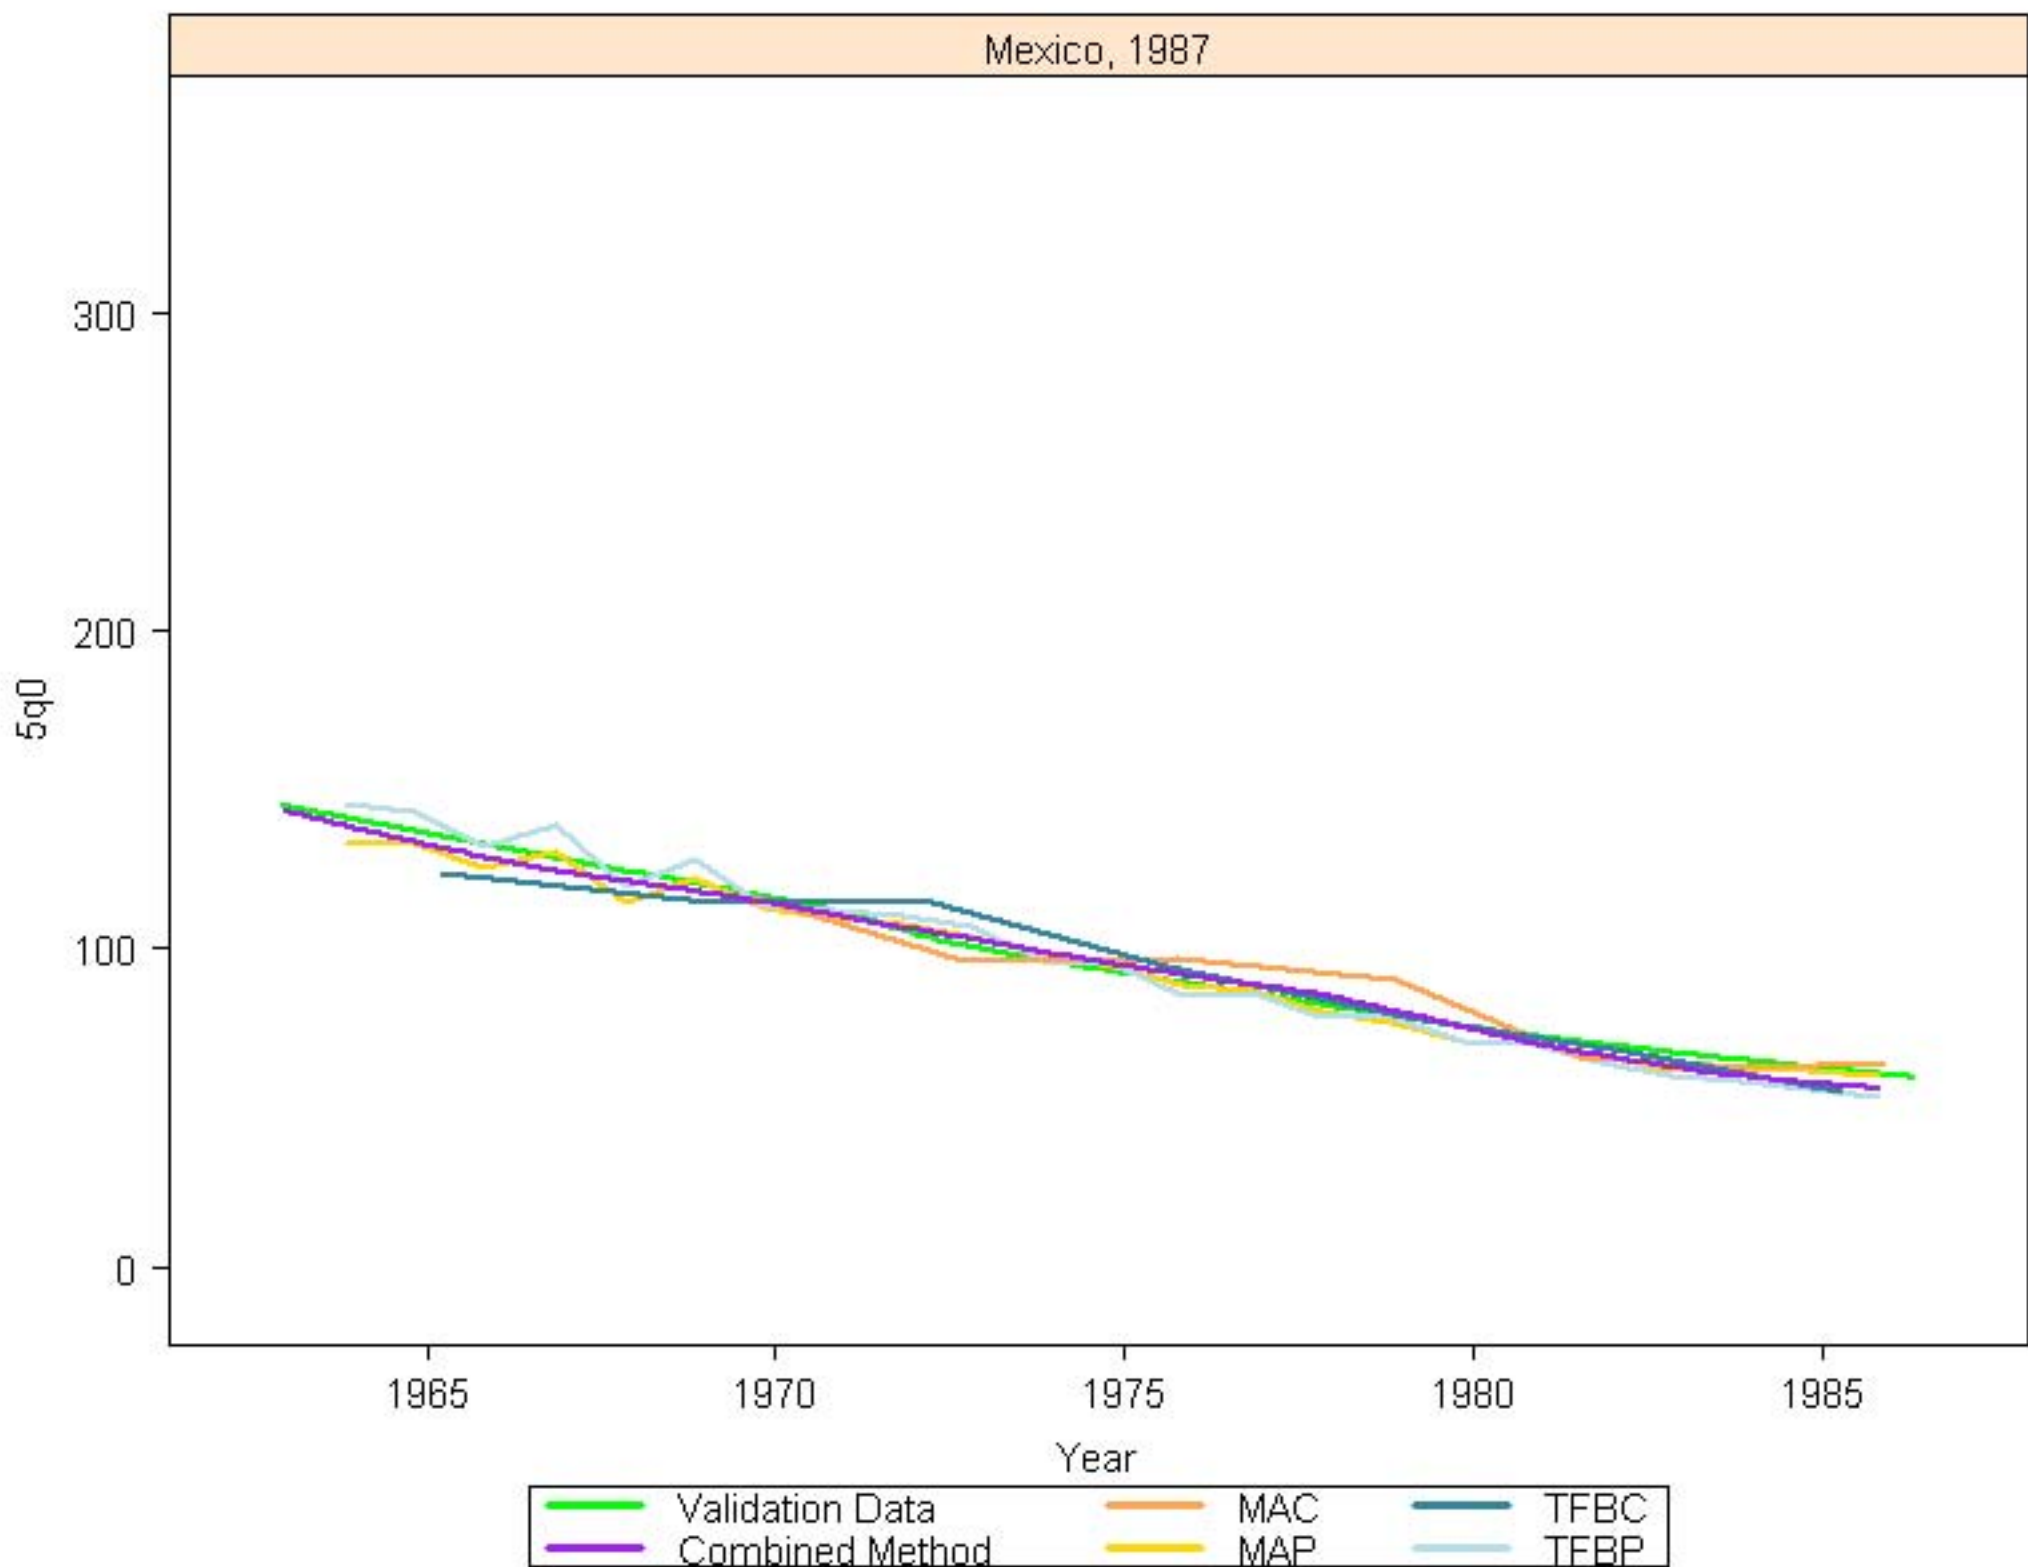

Morocco, 1988

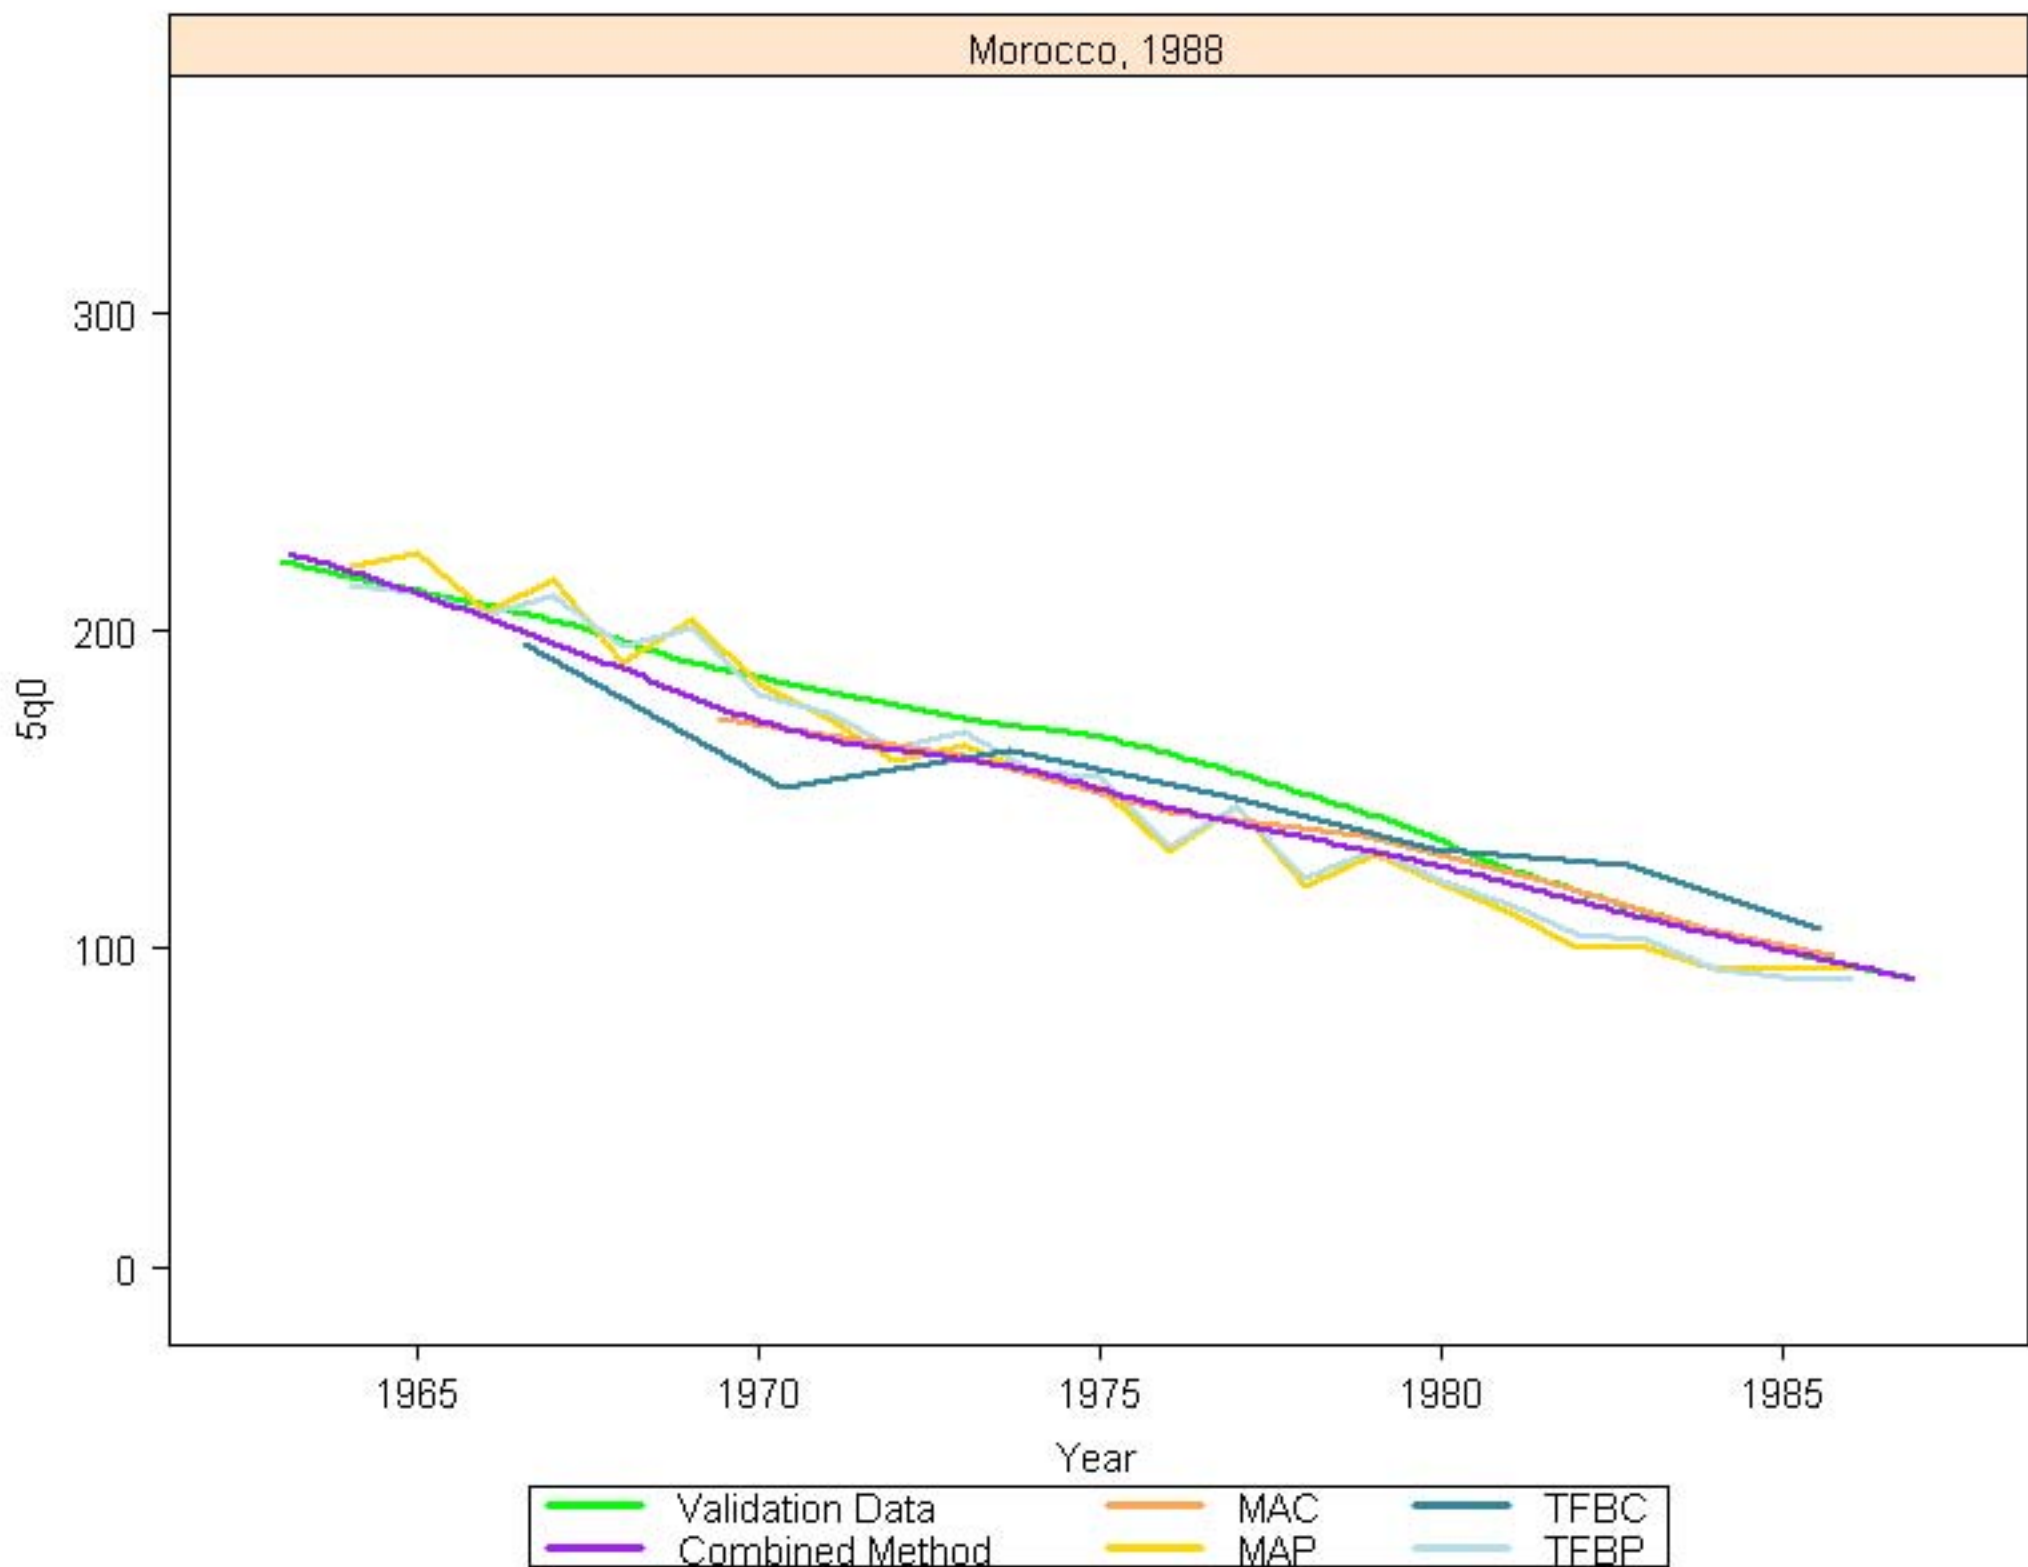

Morocco, 1992

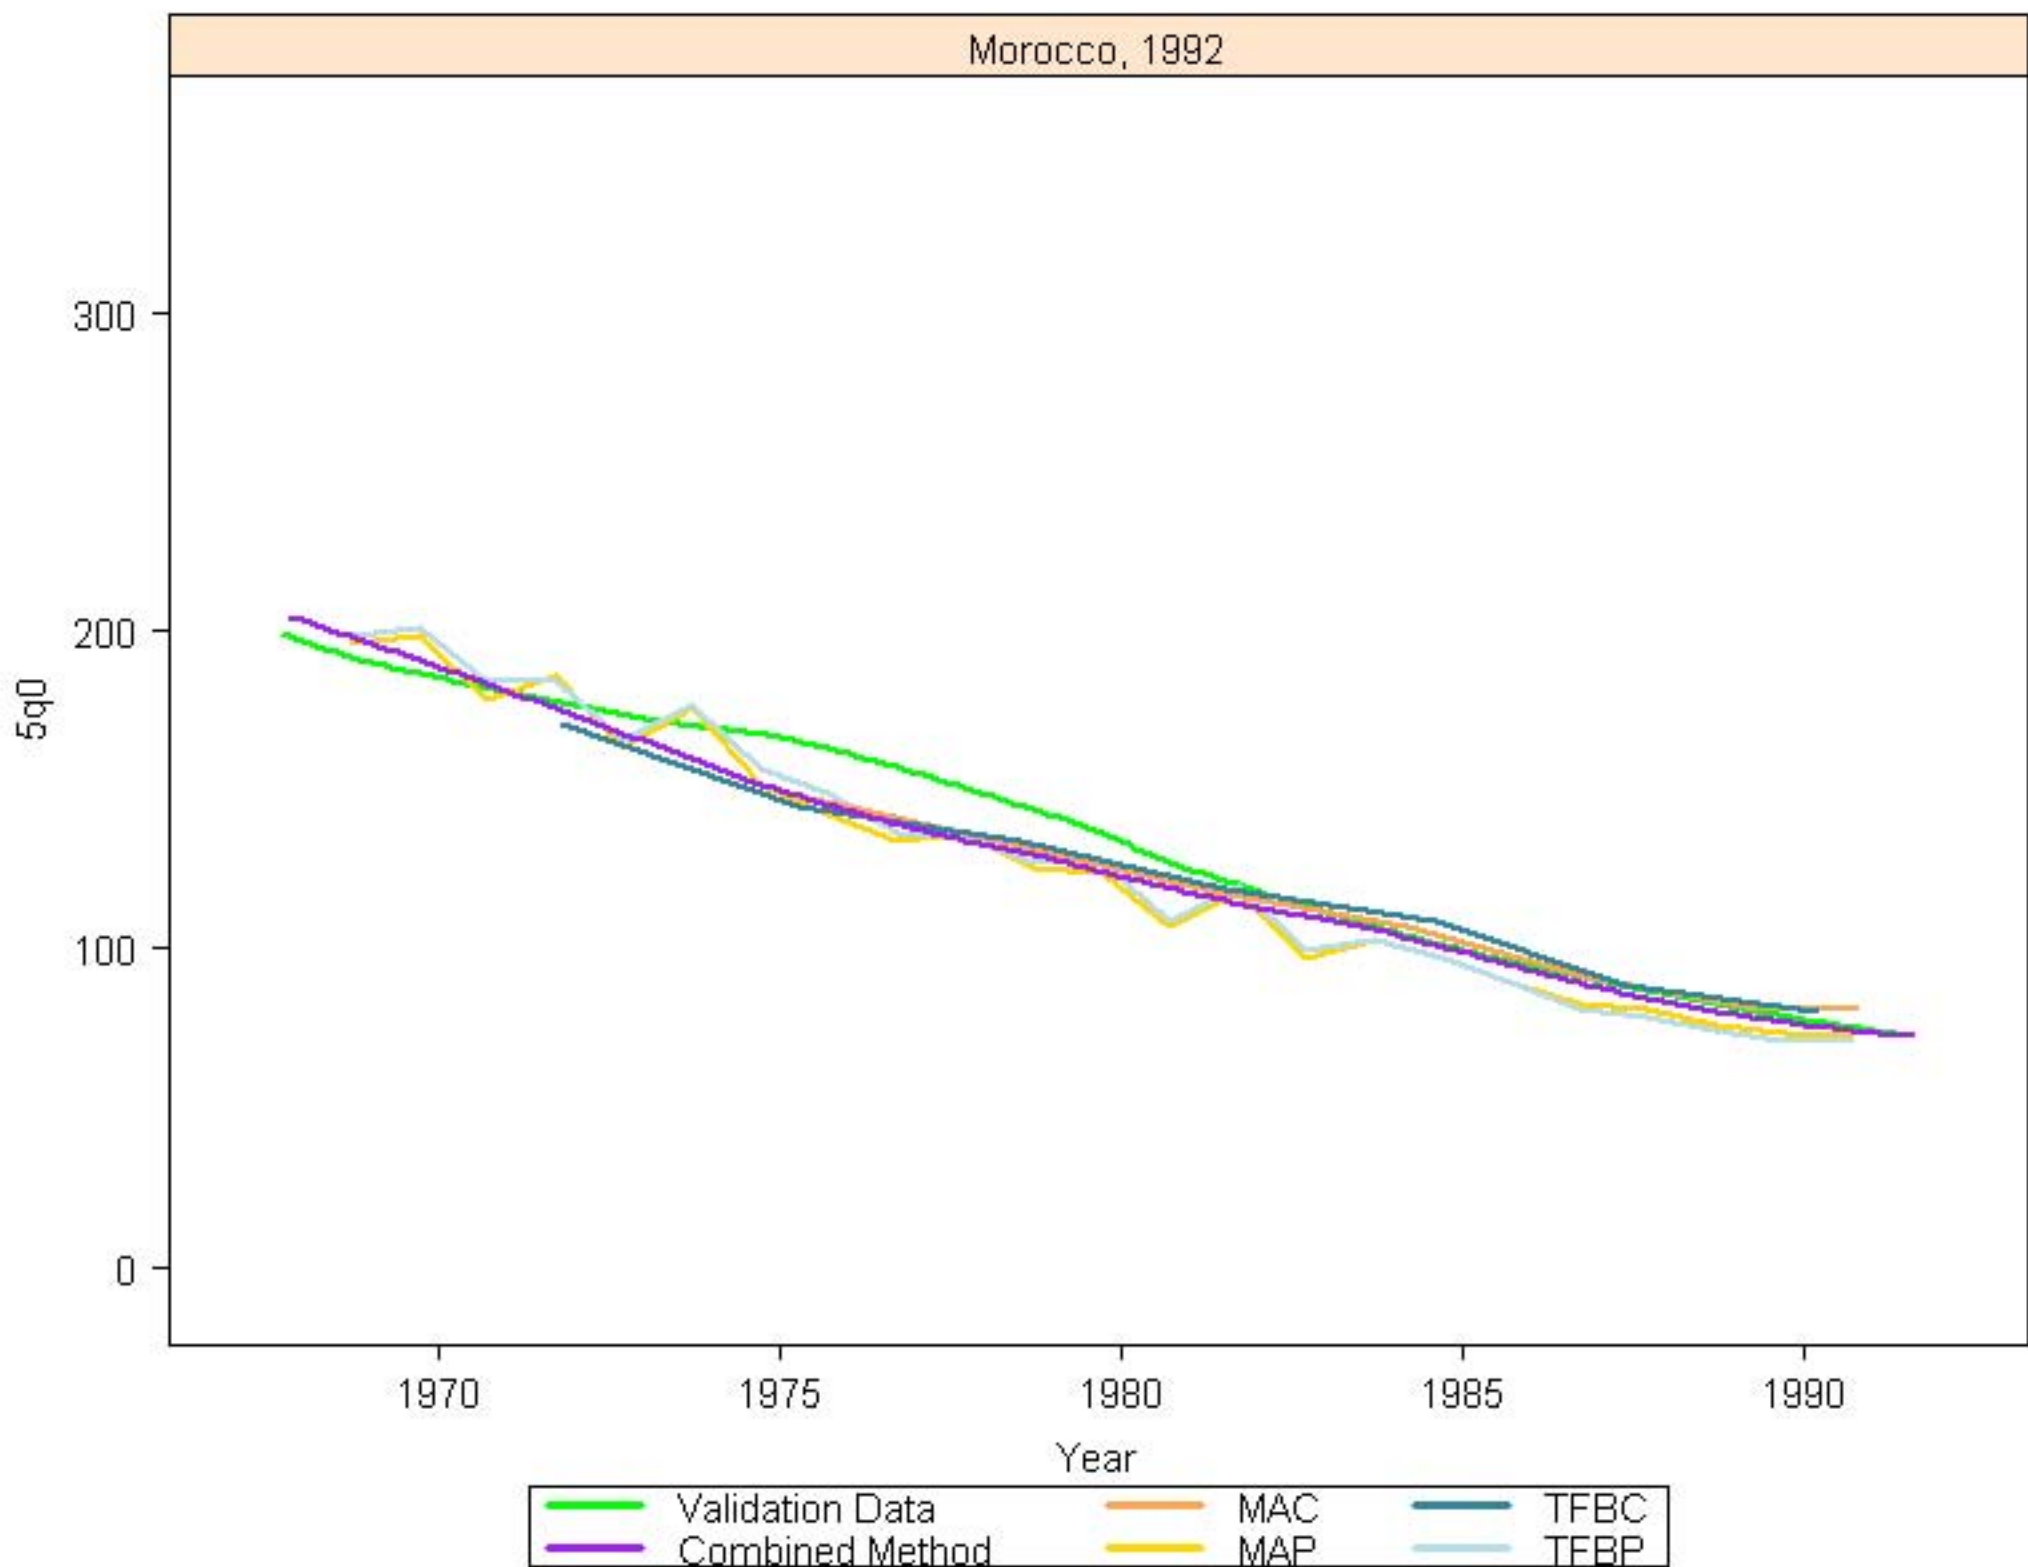

Morocco, 2004

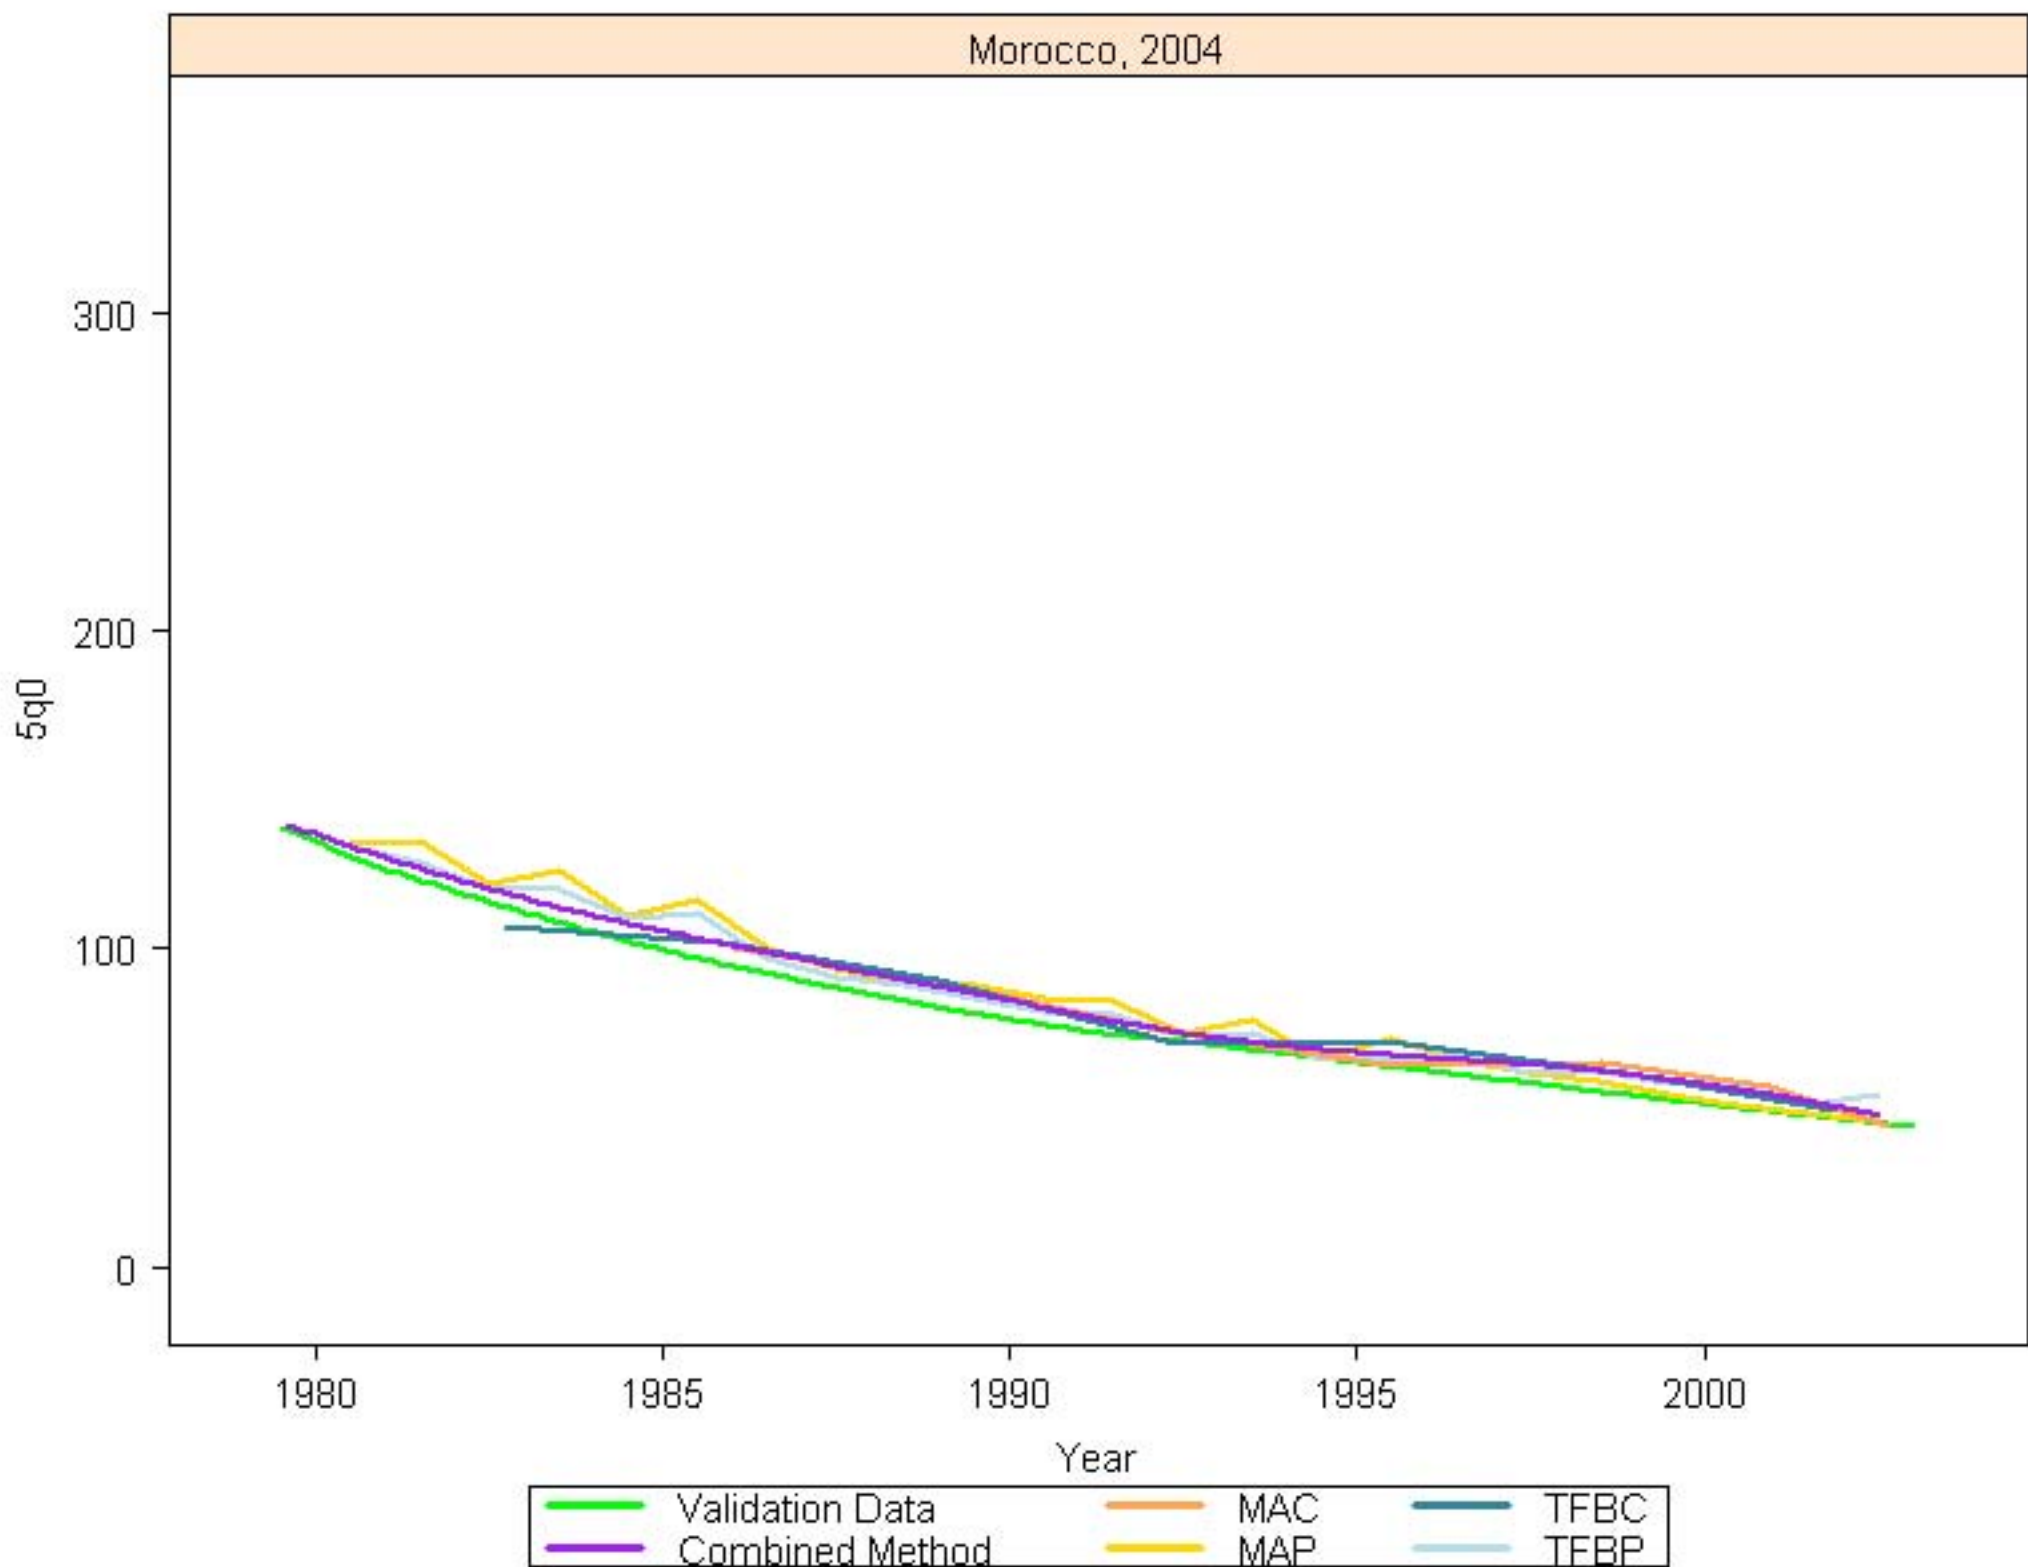

Mozambique, 1997

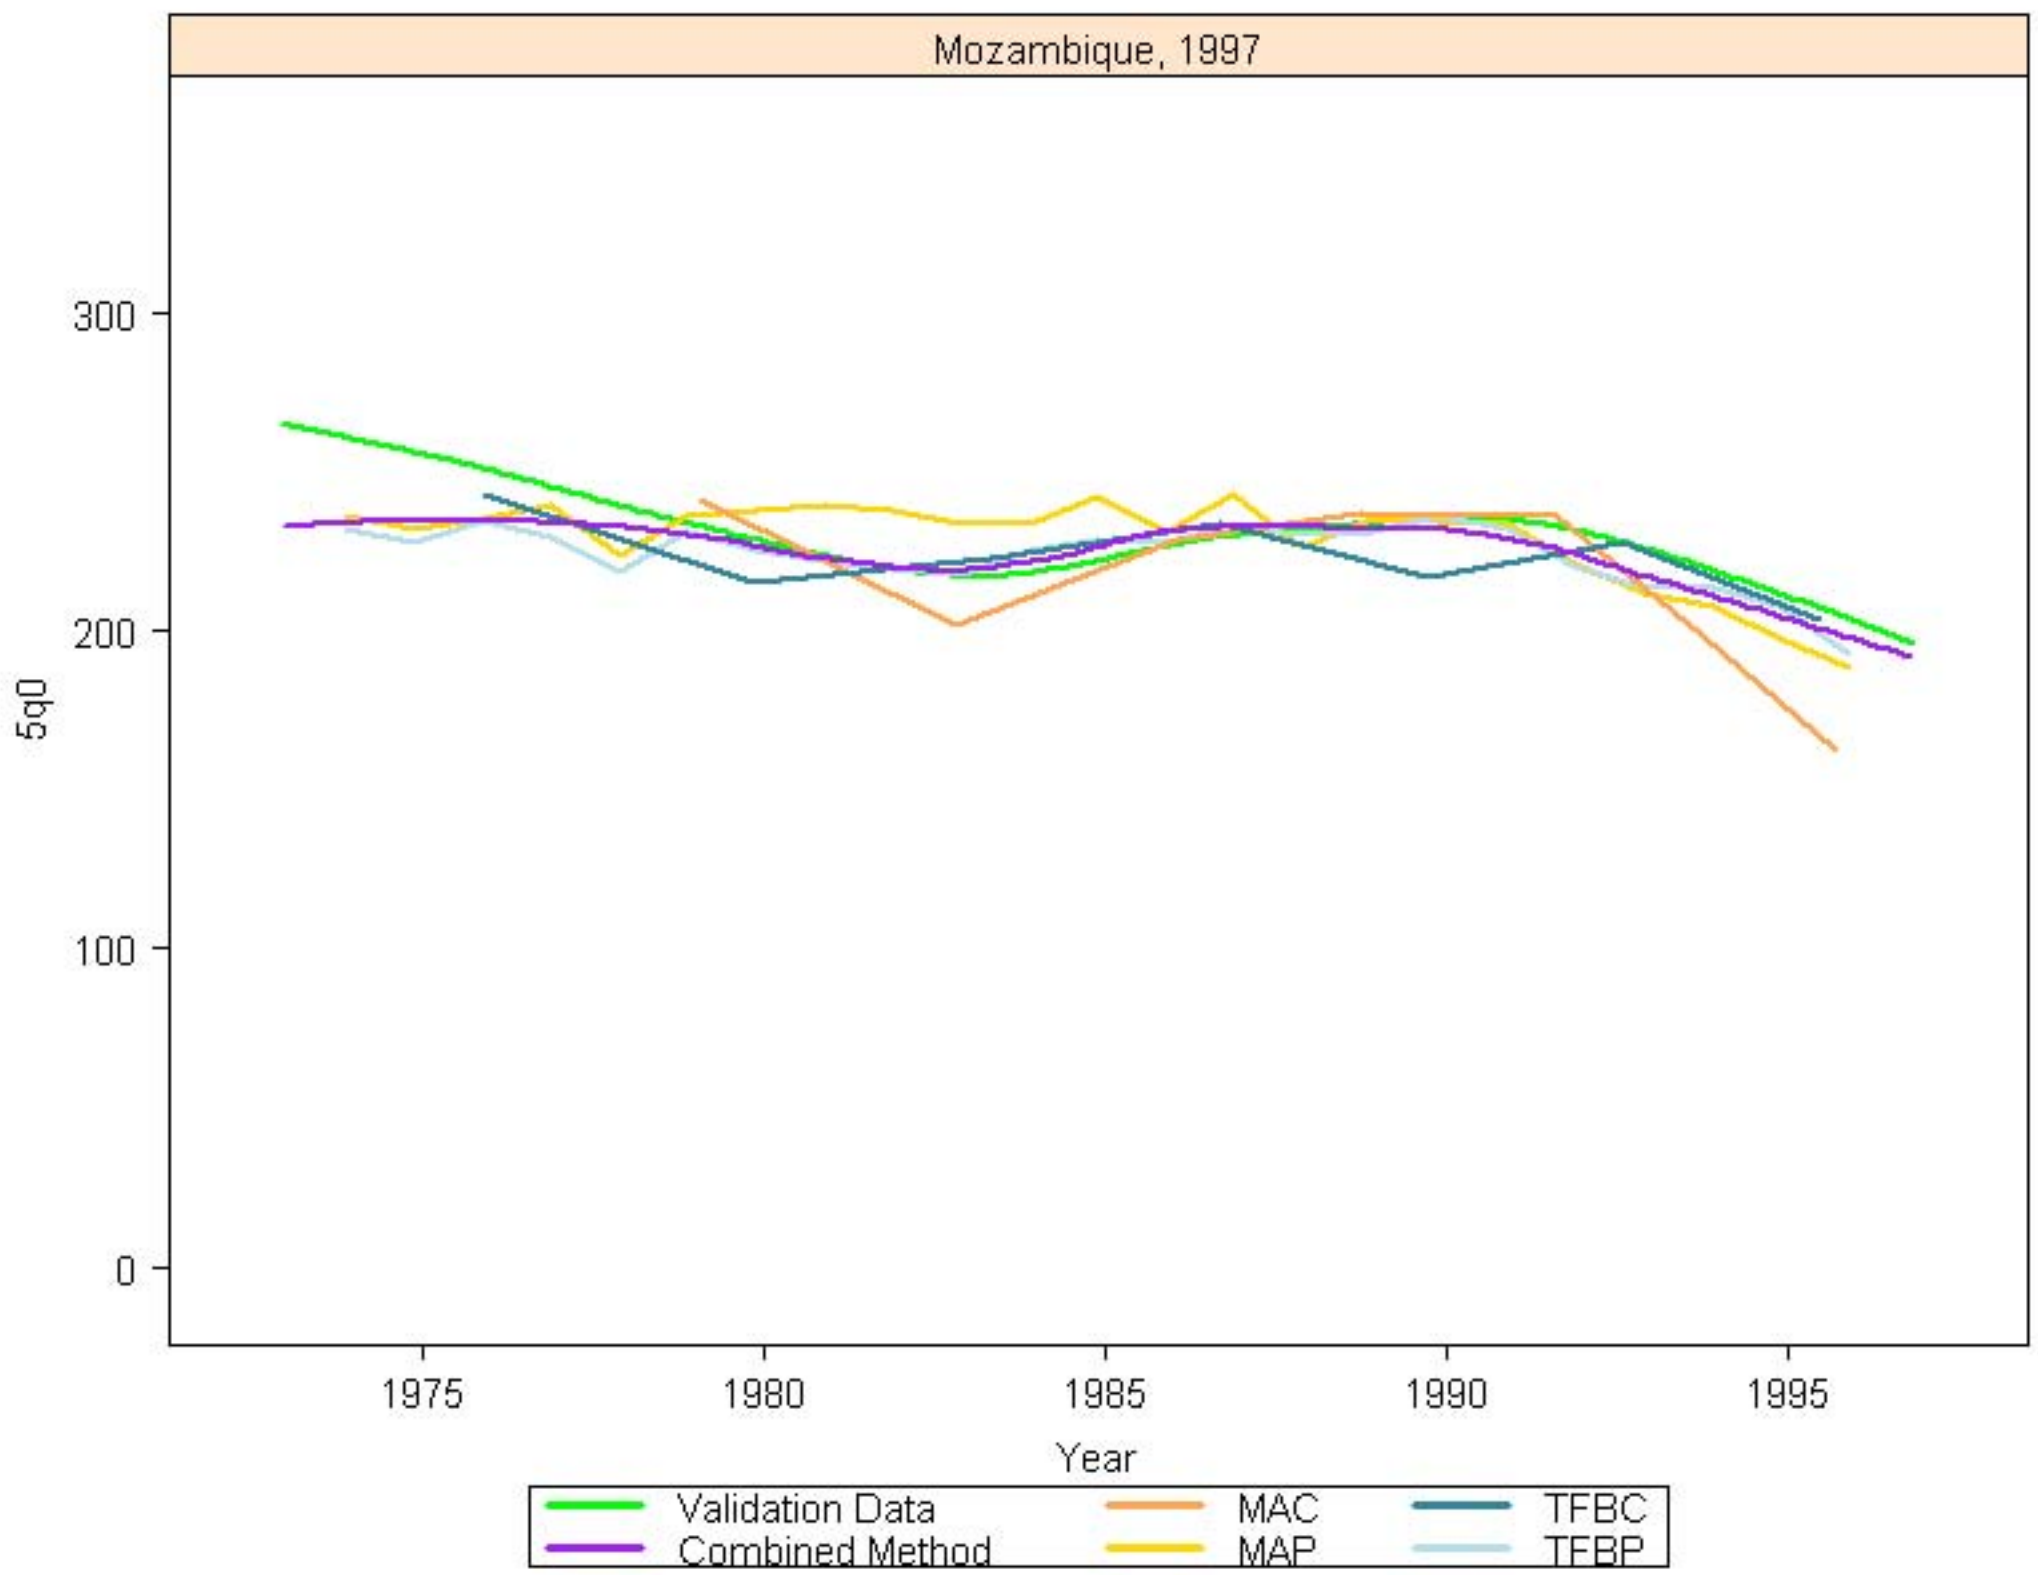



Mozambique, 2004

5q0

300  
200  
100  
0

1980

1985

1990

1995

2000

Year

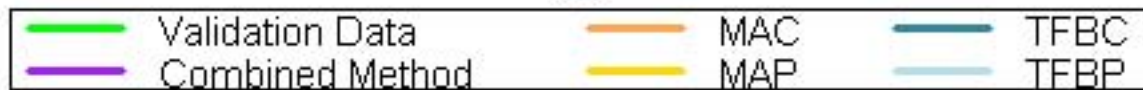

Namibia, 1993

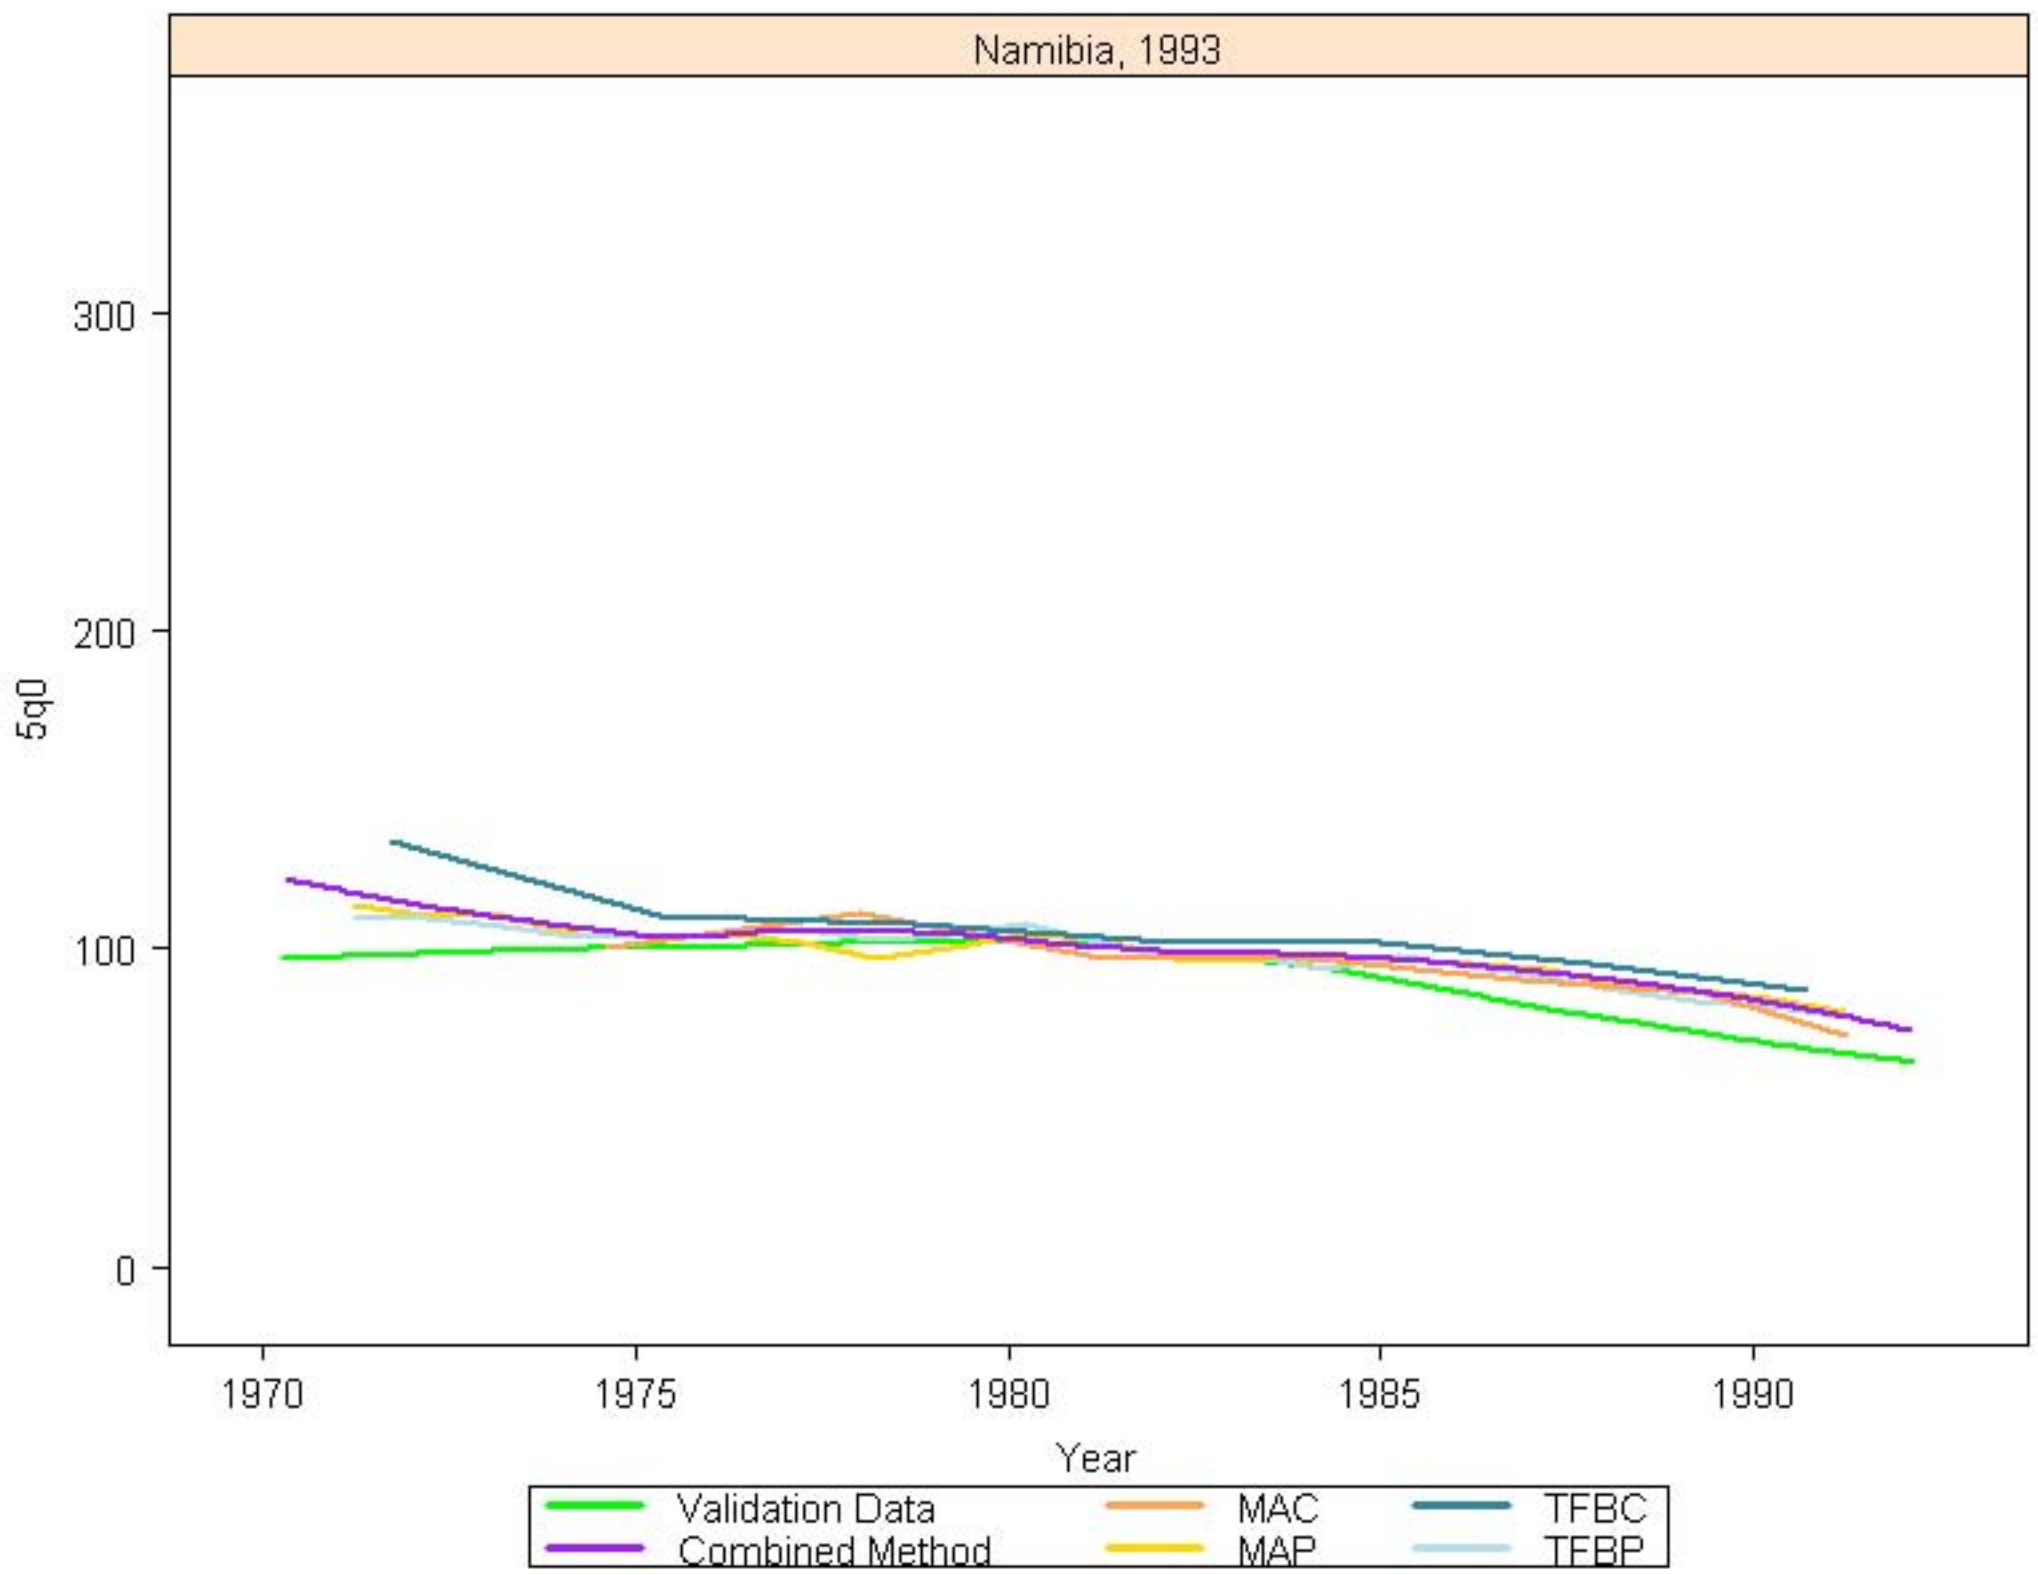

Namibia, 2001

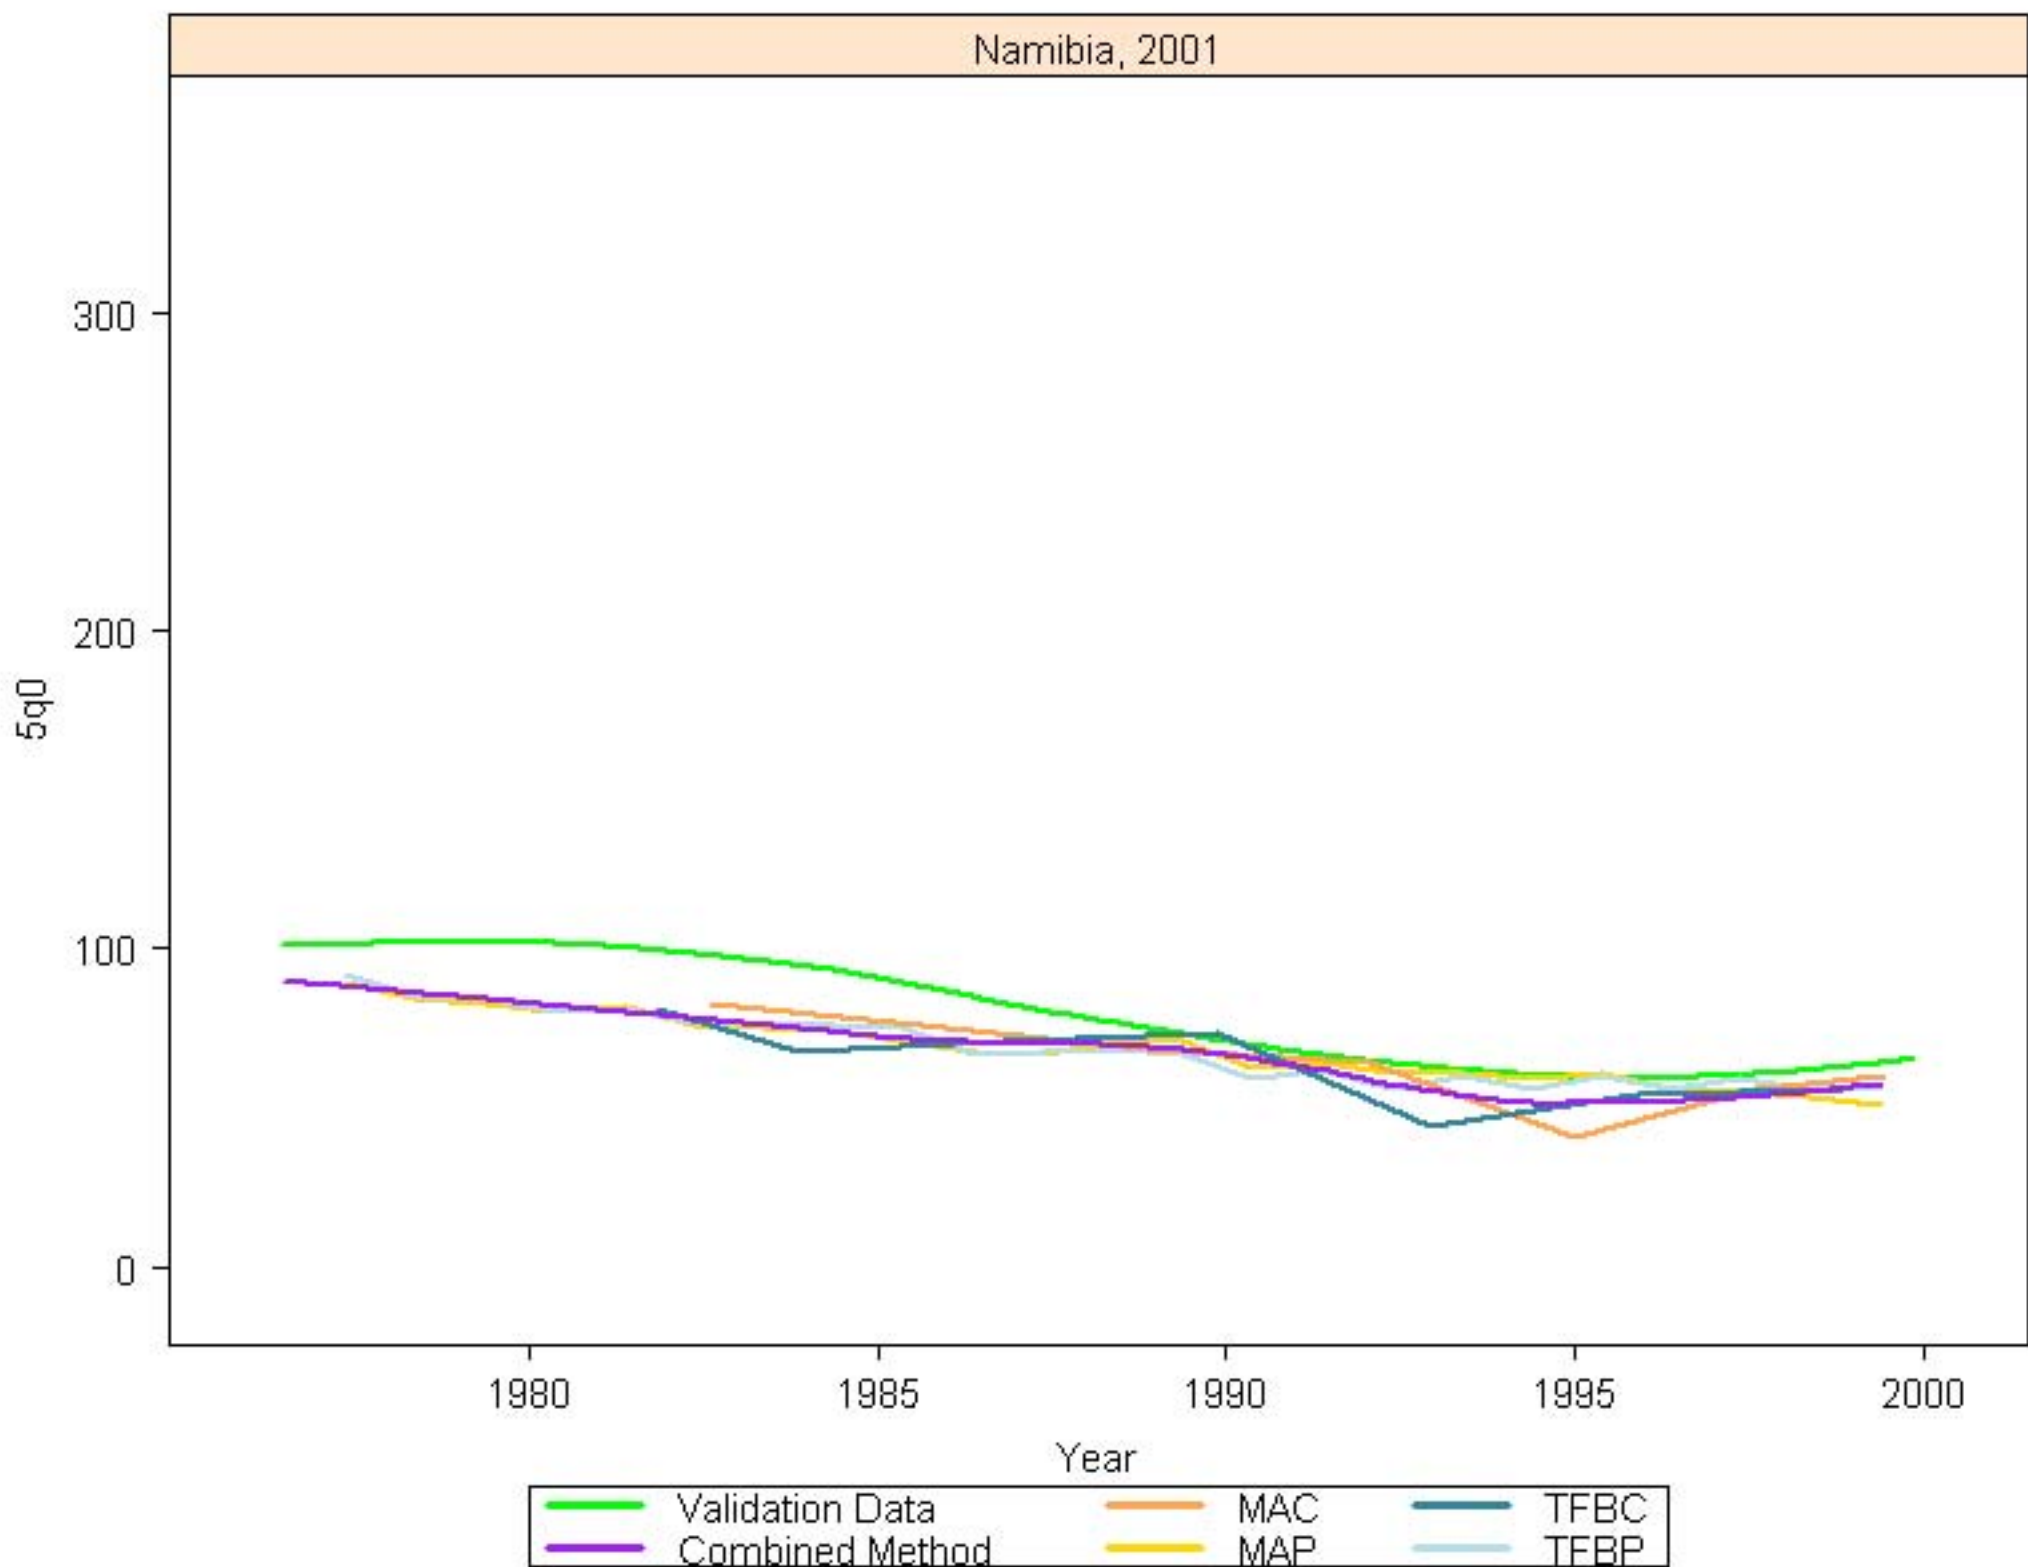

Nepal, 1996

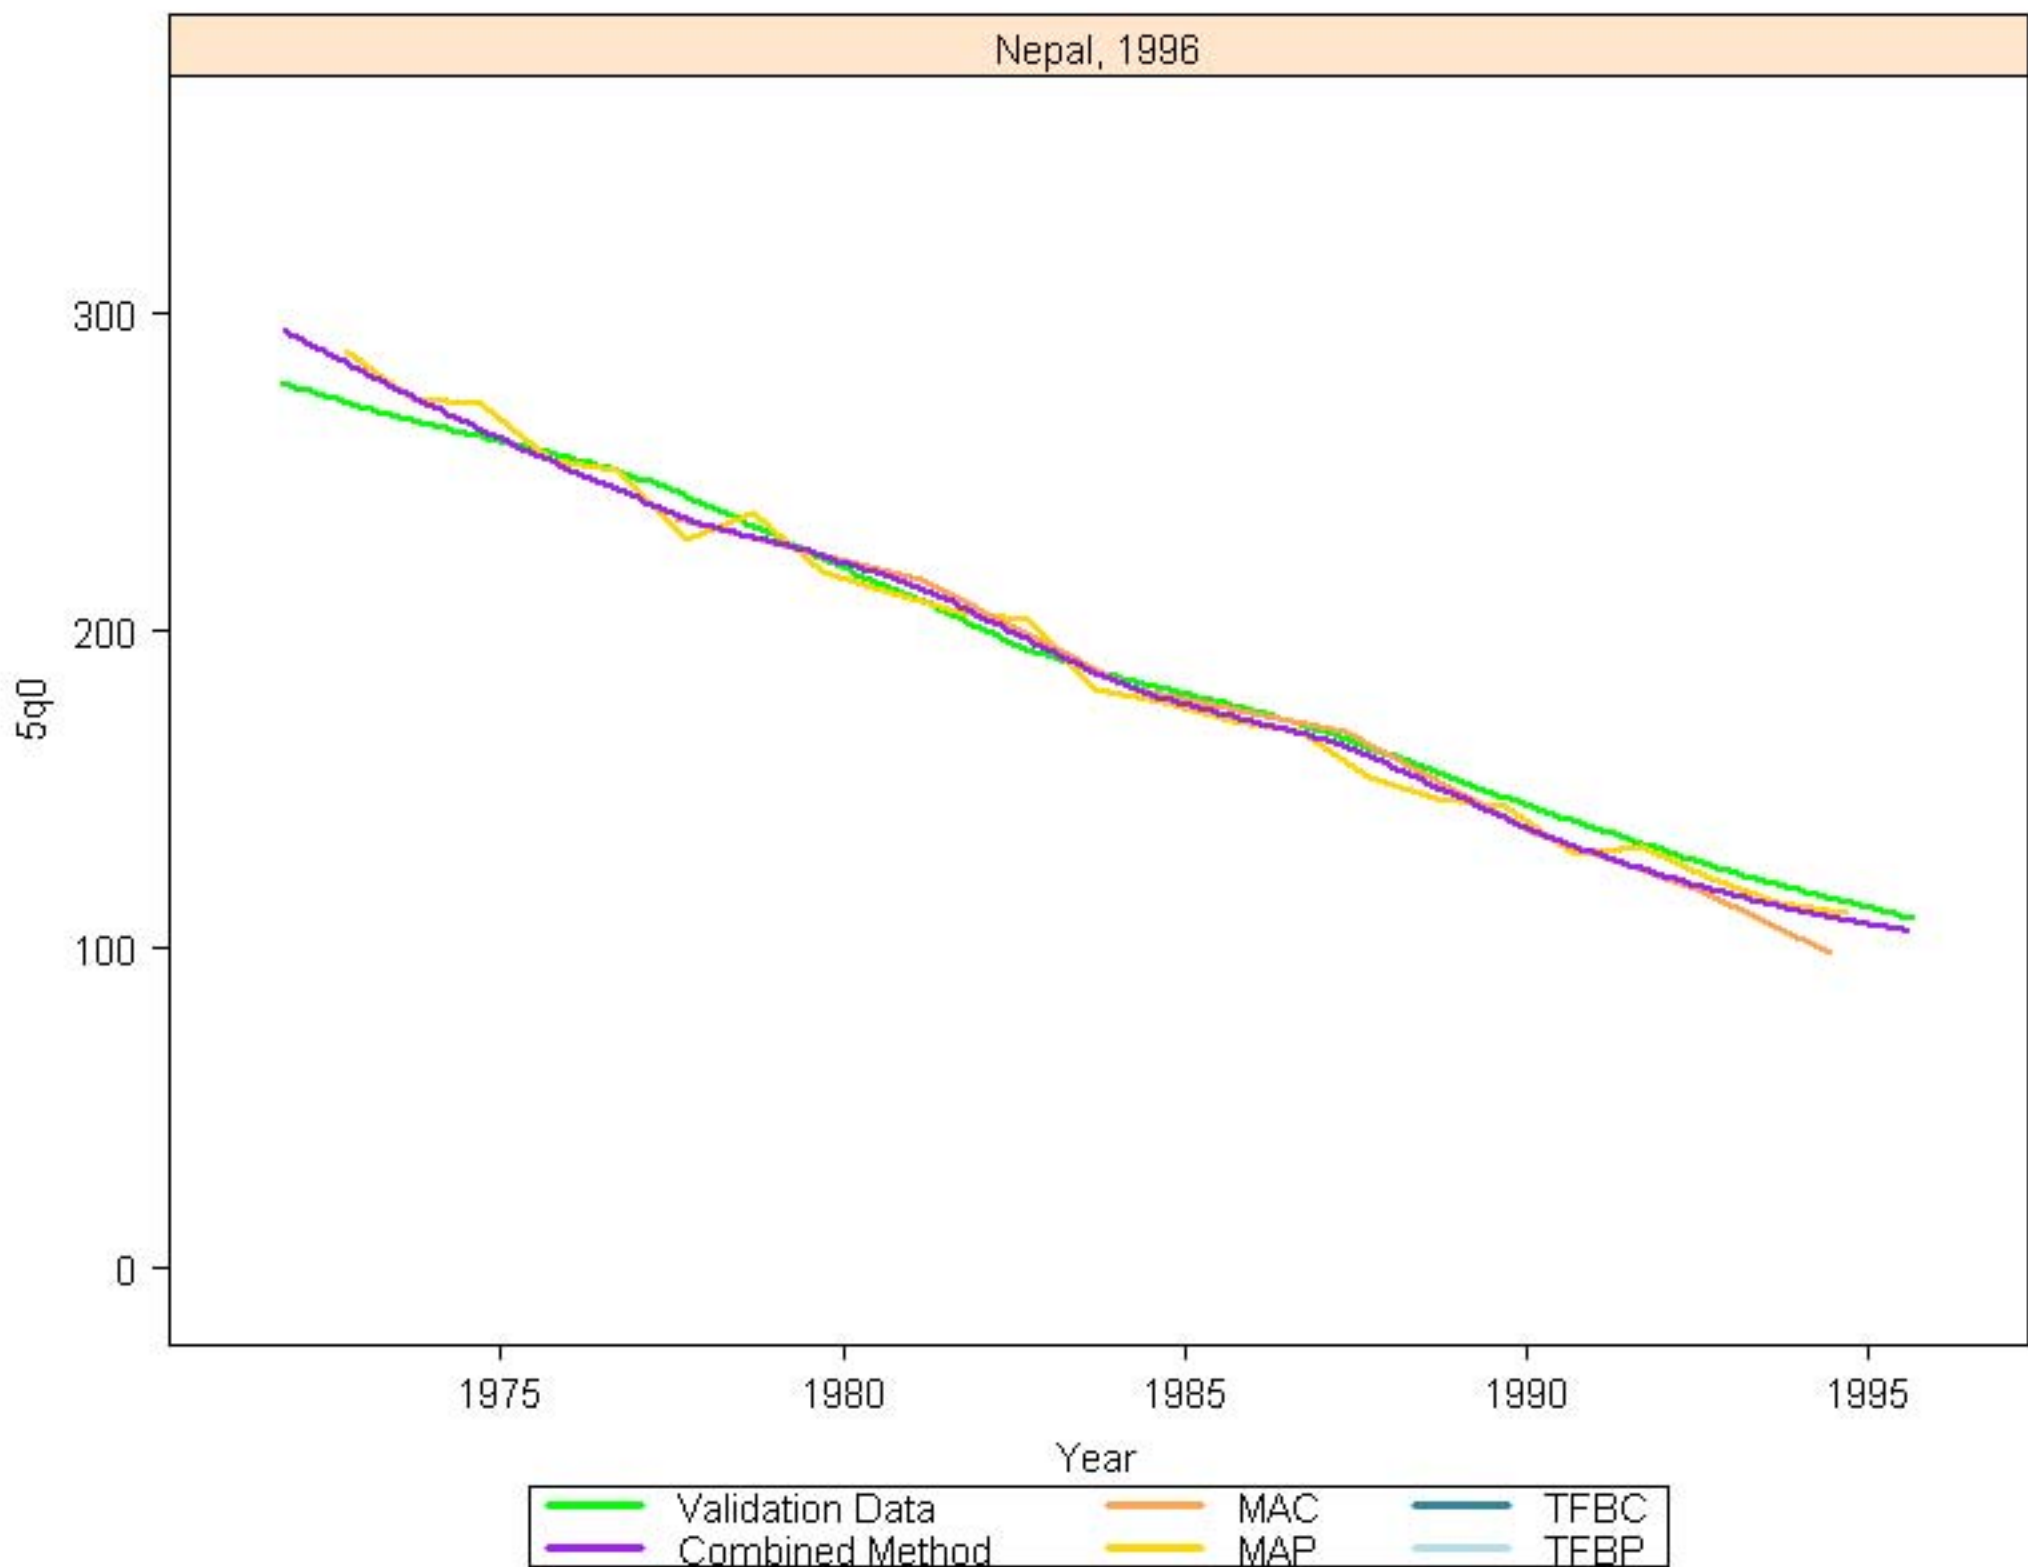

Nepal, 2001

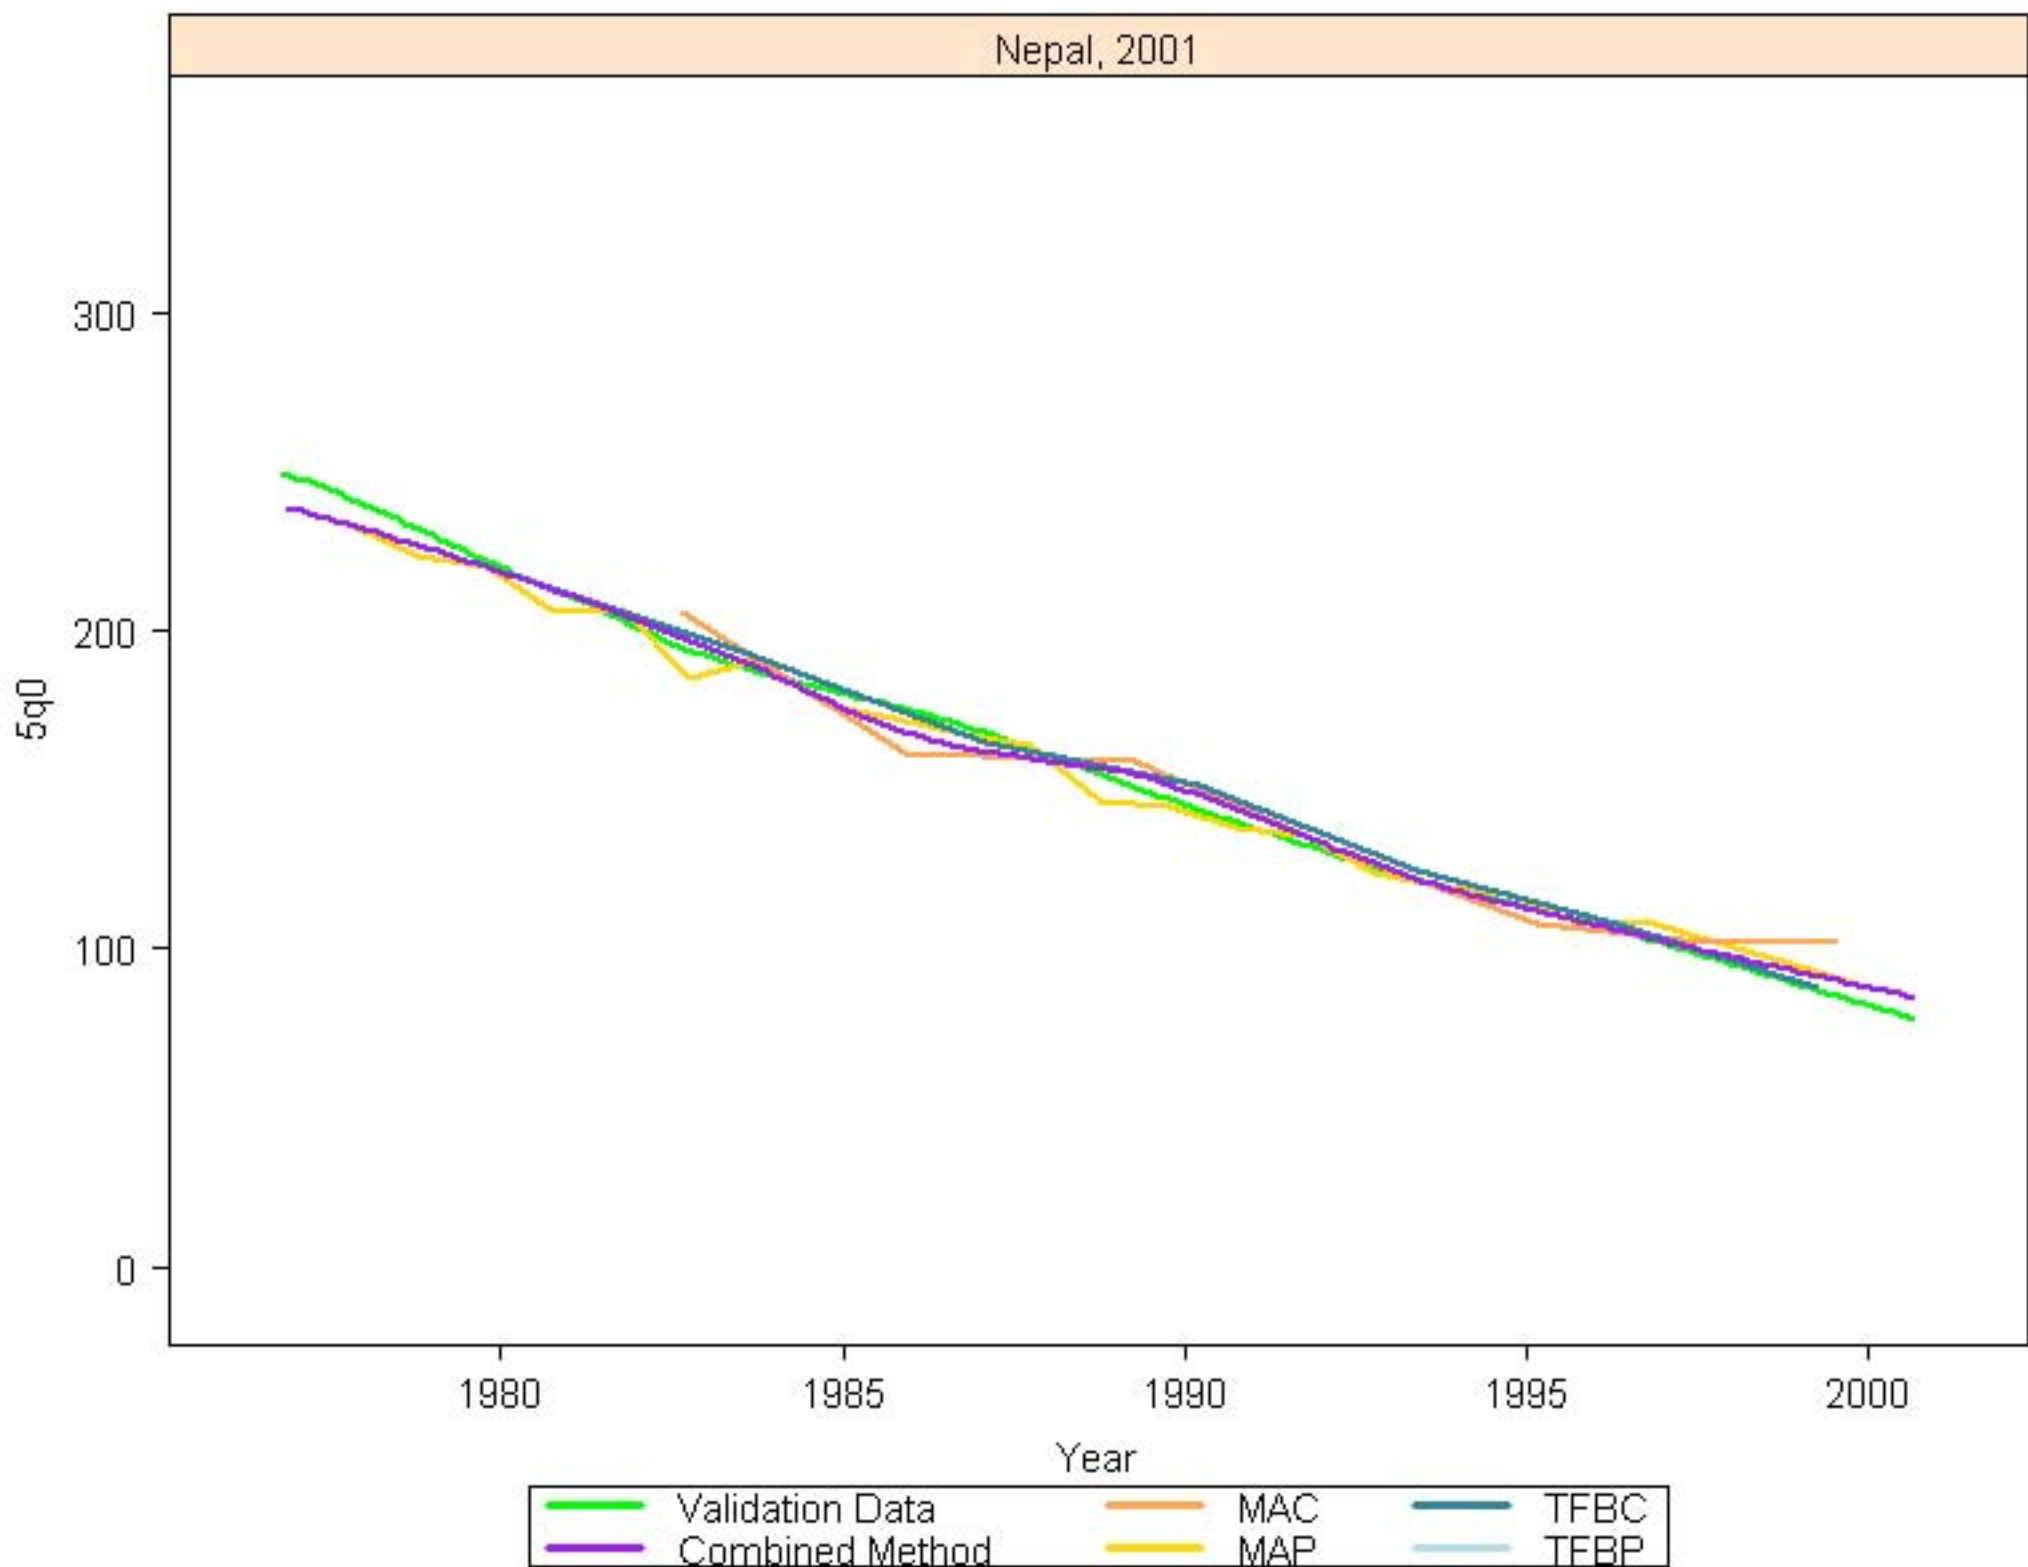

Nepal, 2006

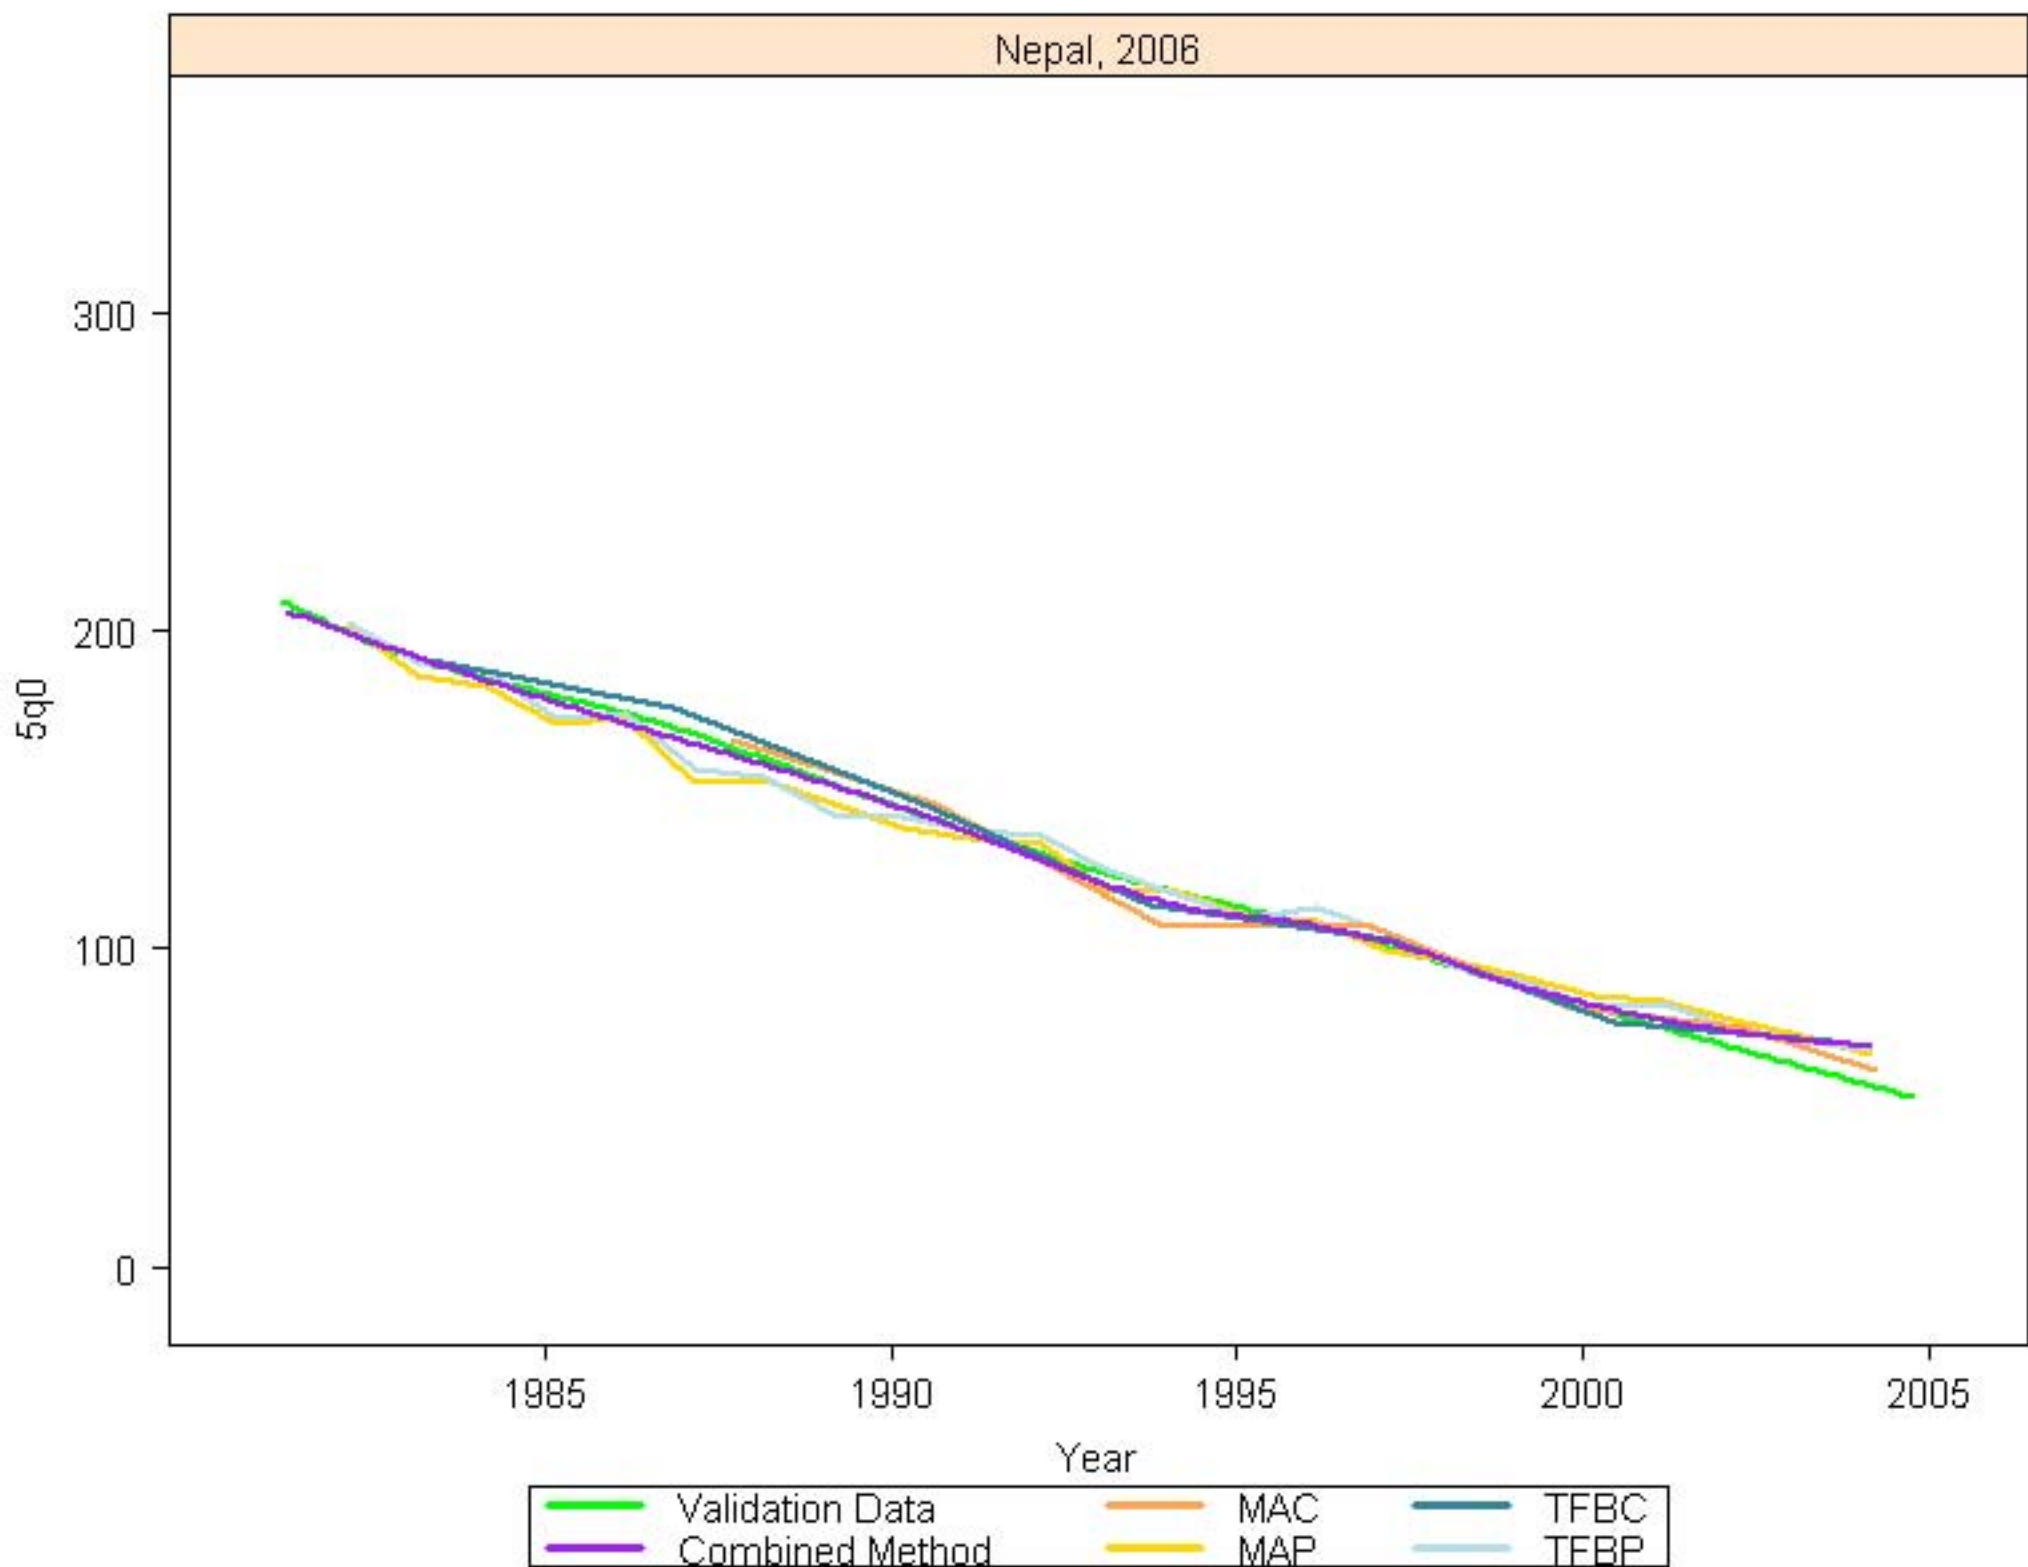

Nicaragua, 1998

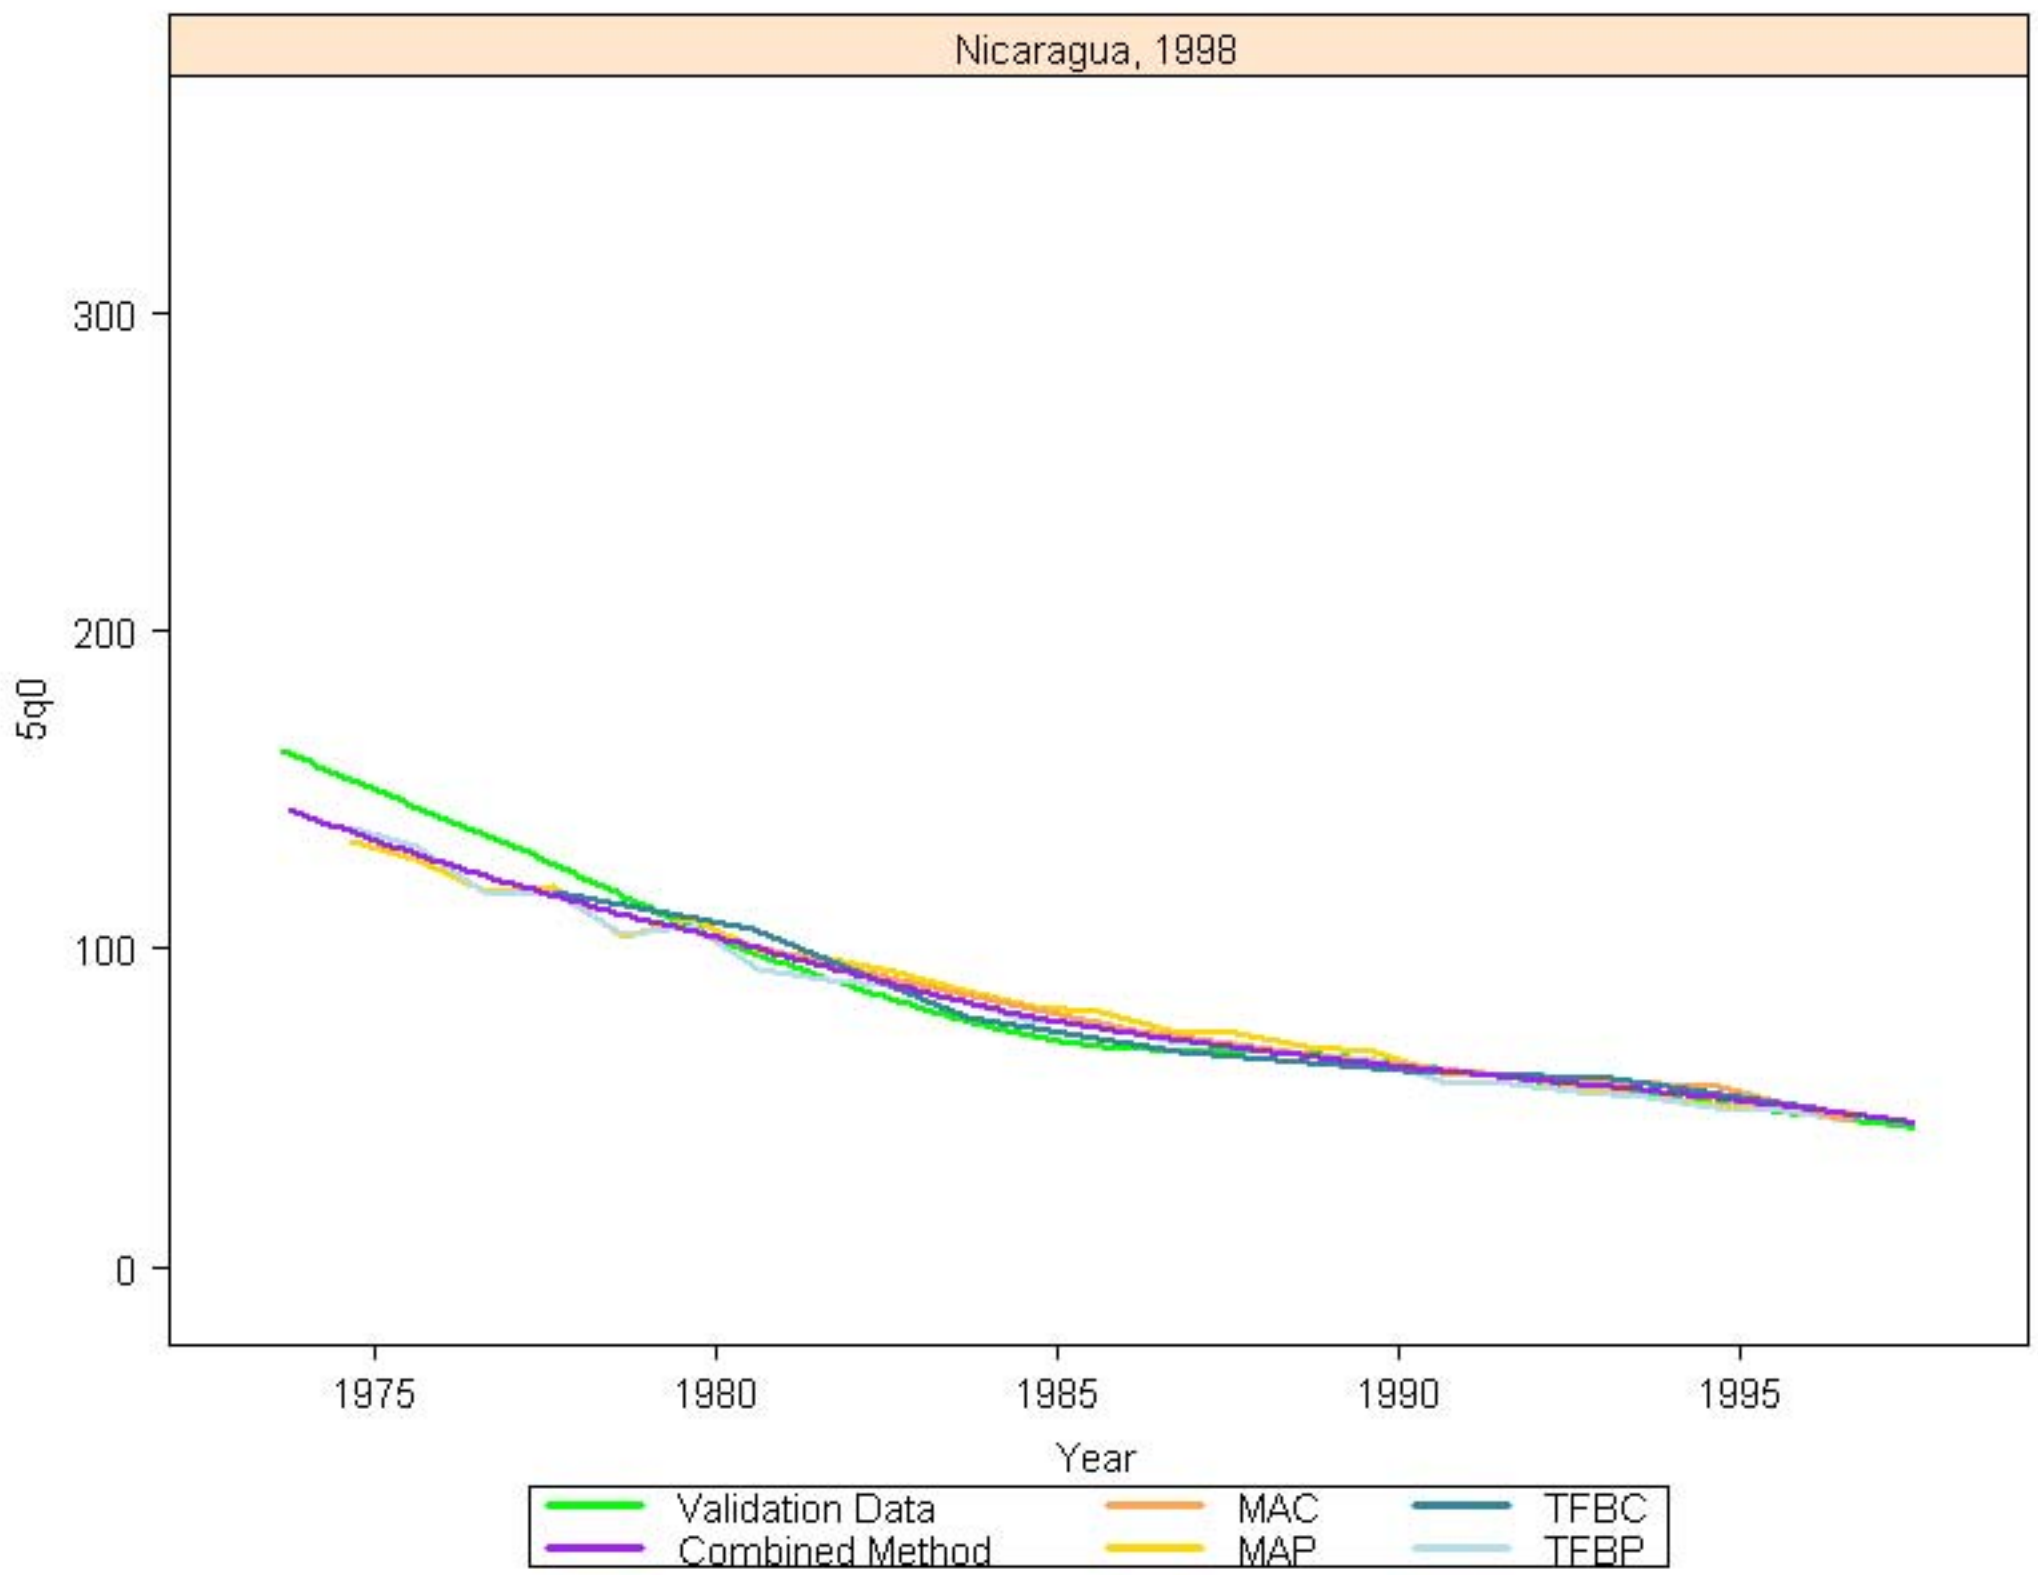

Nicaragua, 2002

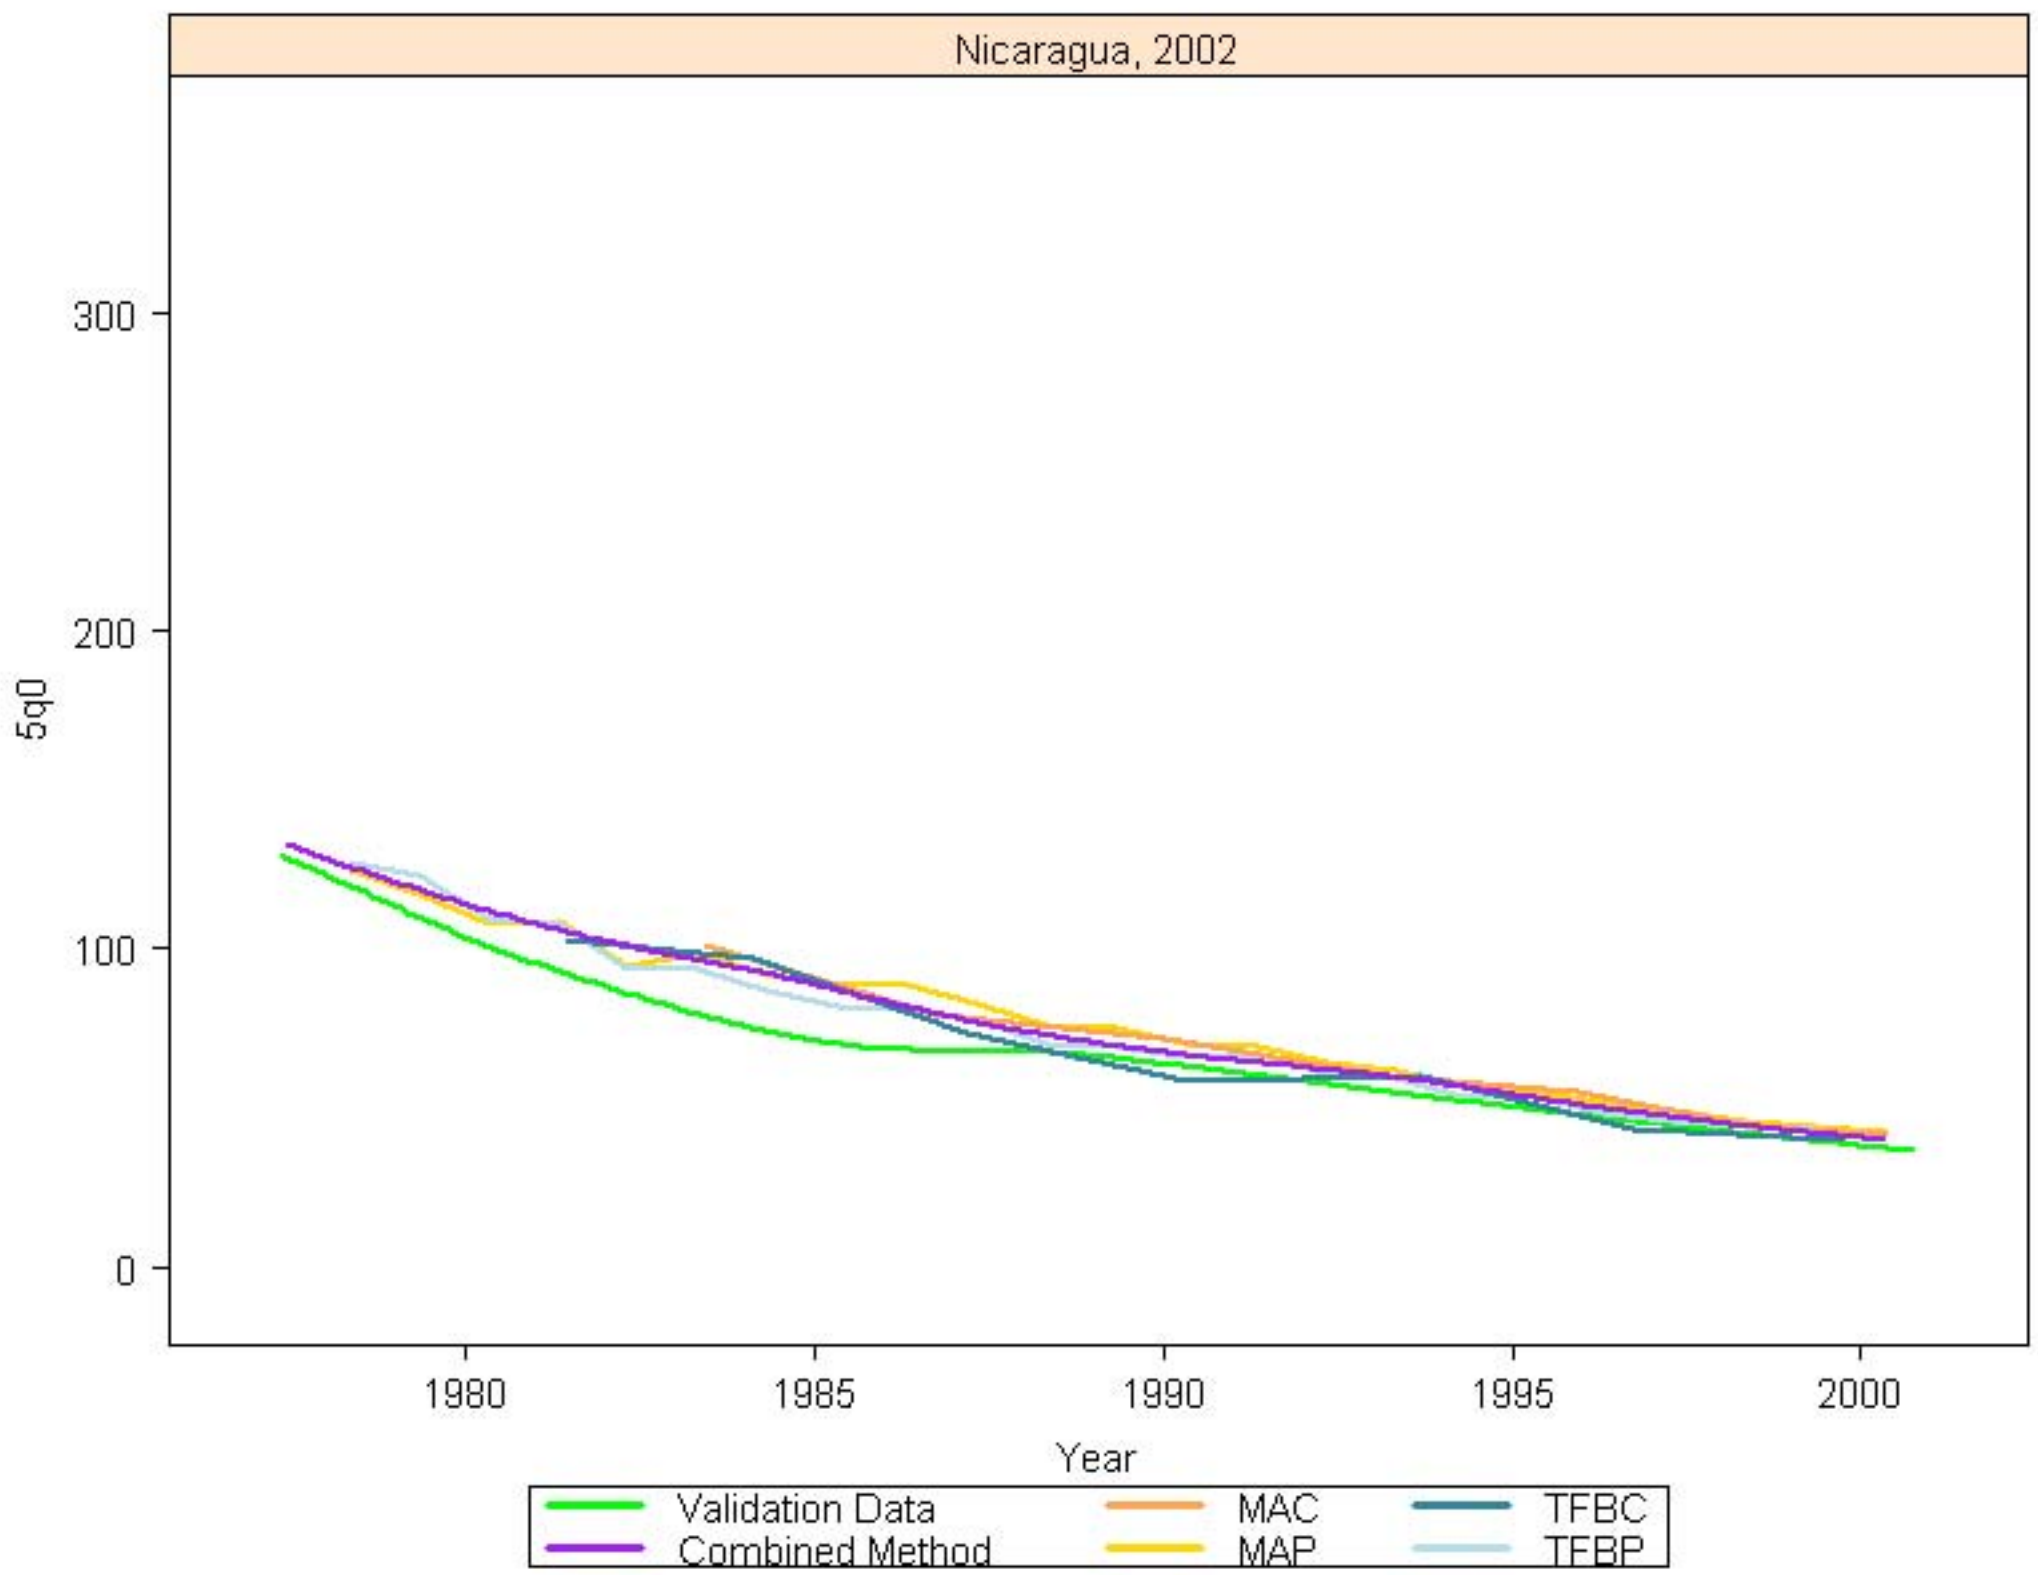



Niger, 1992

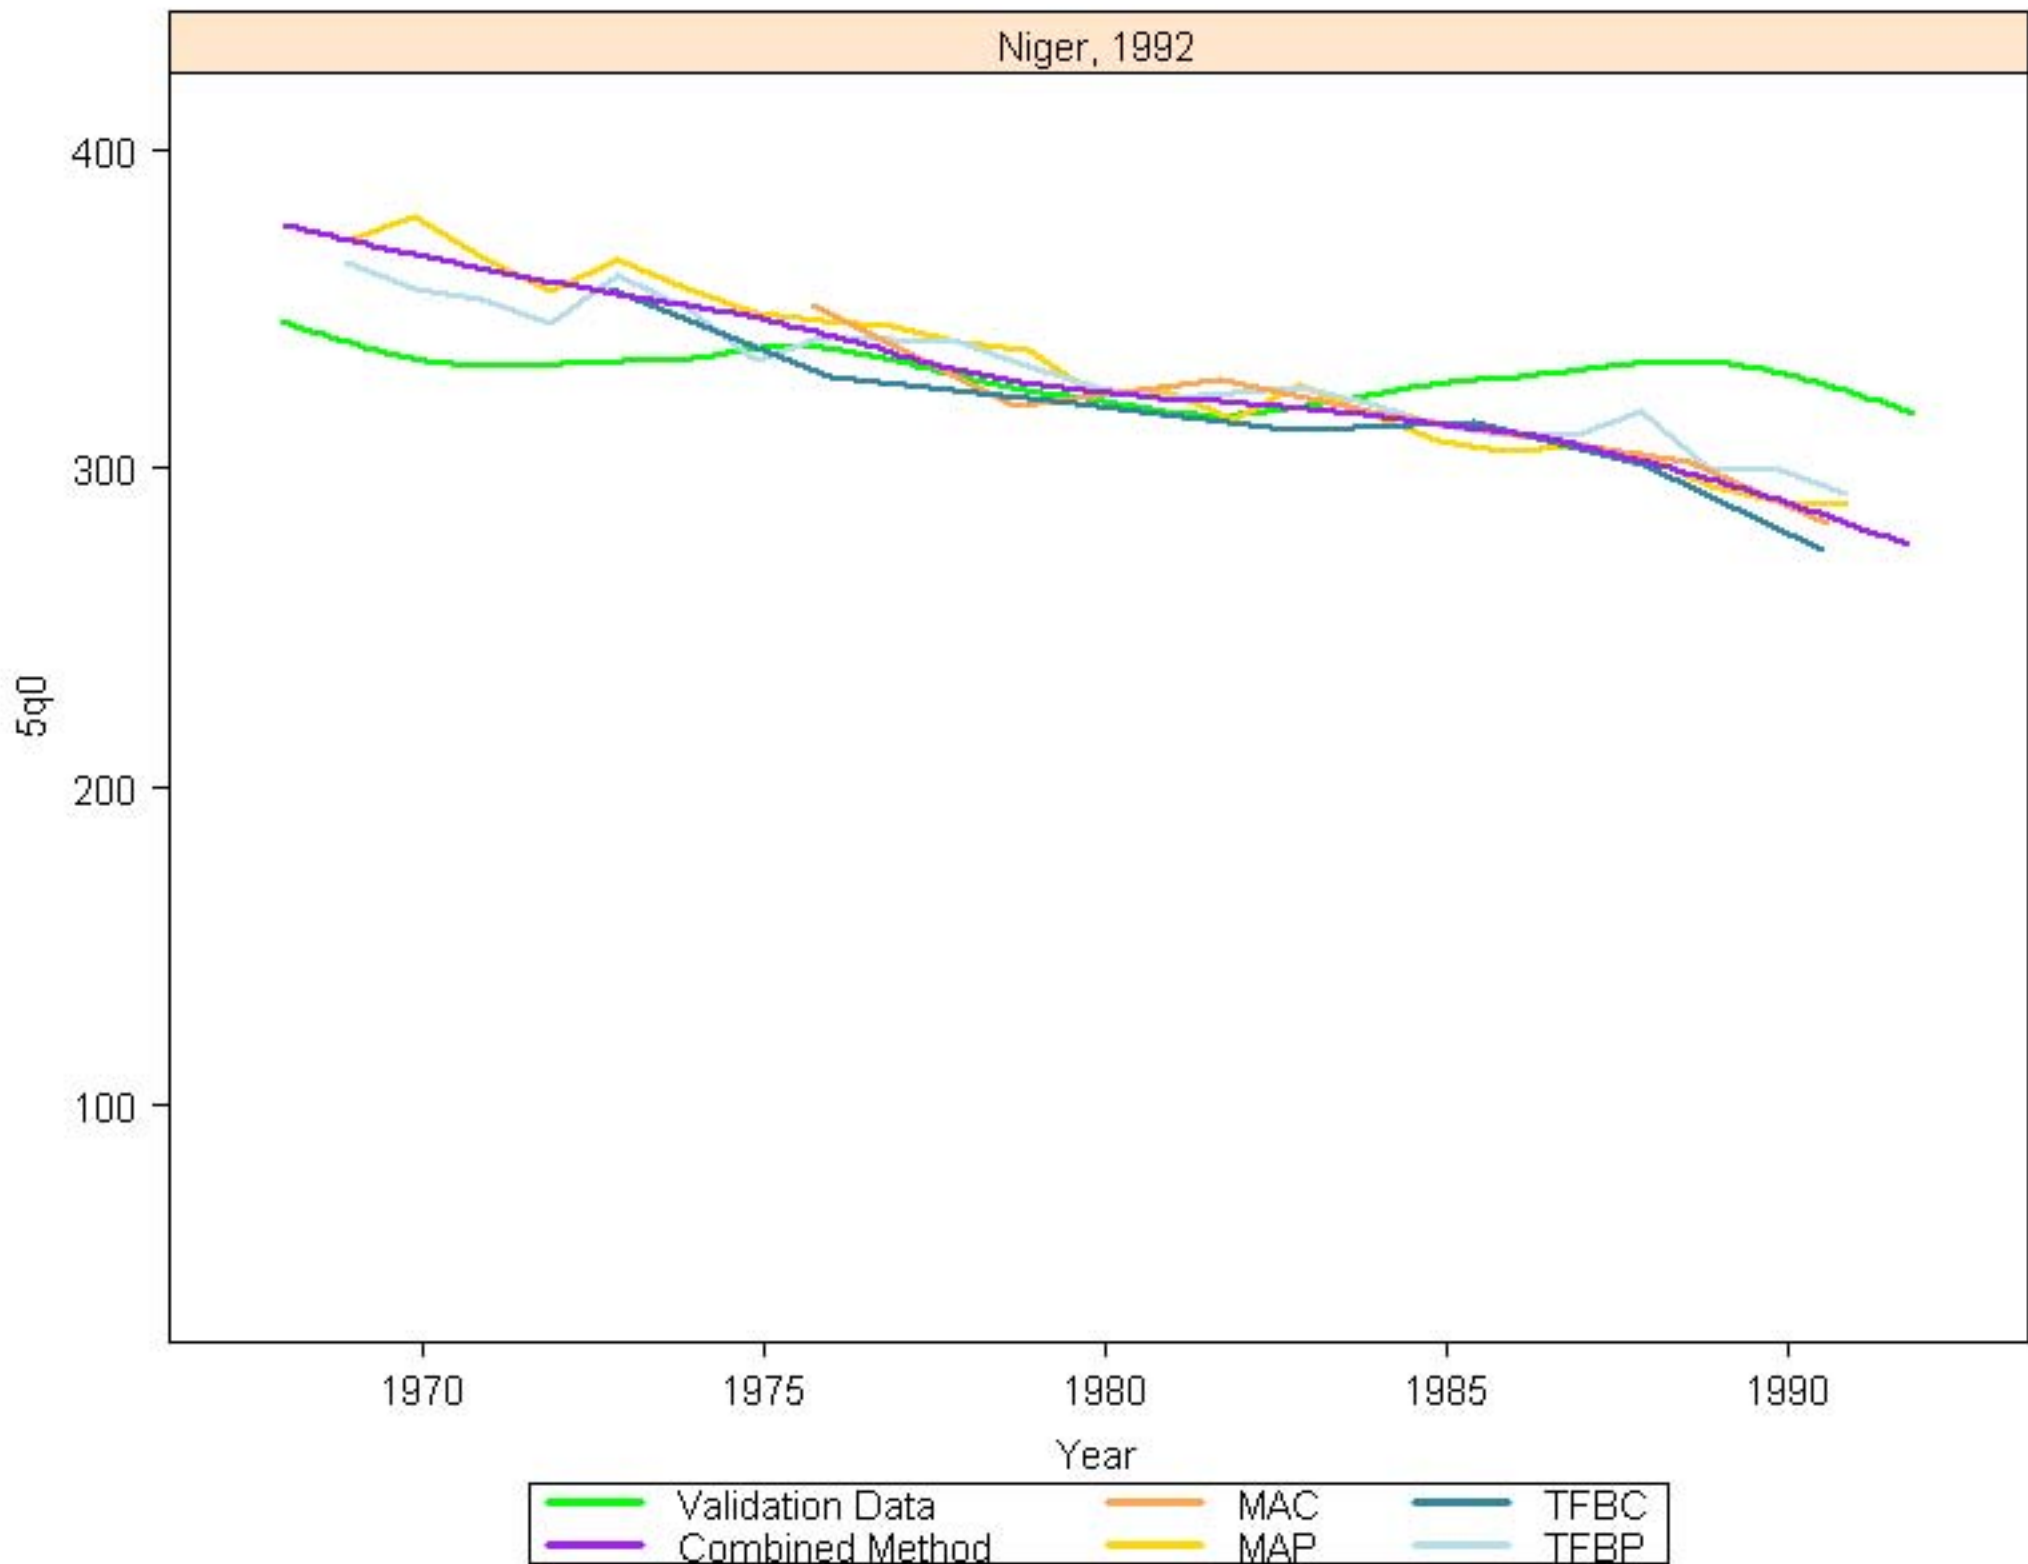

Niger, 1998

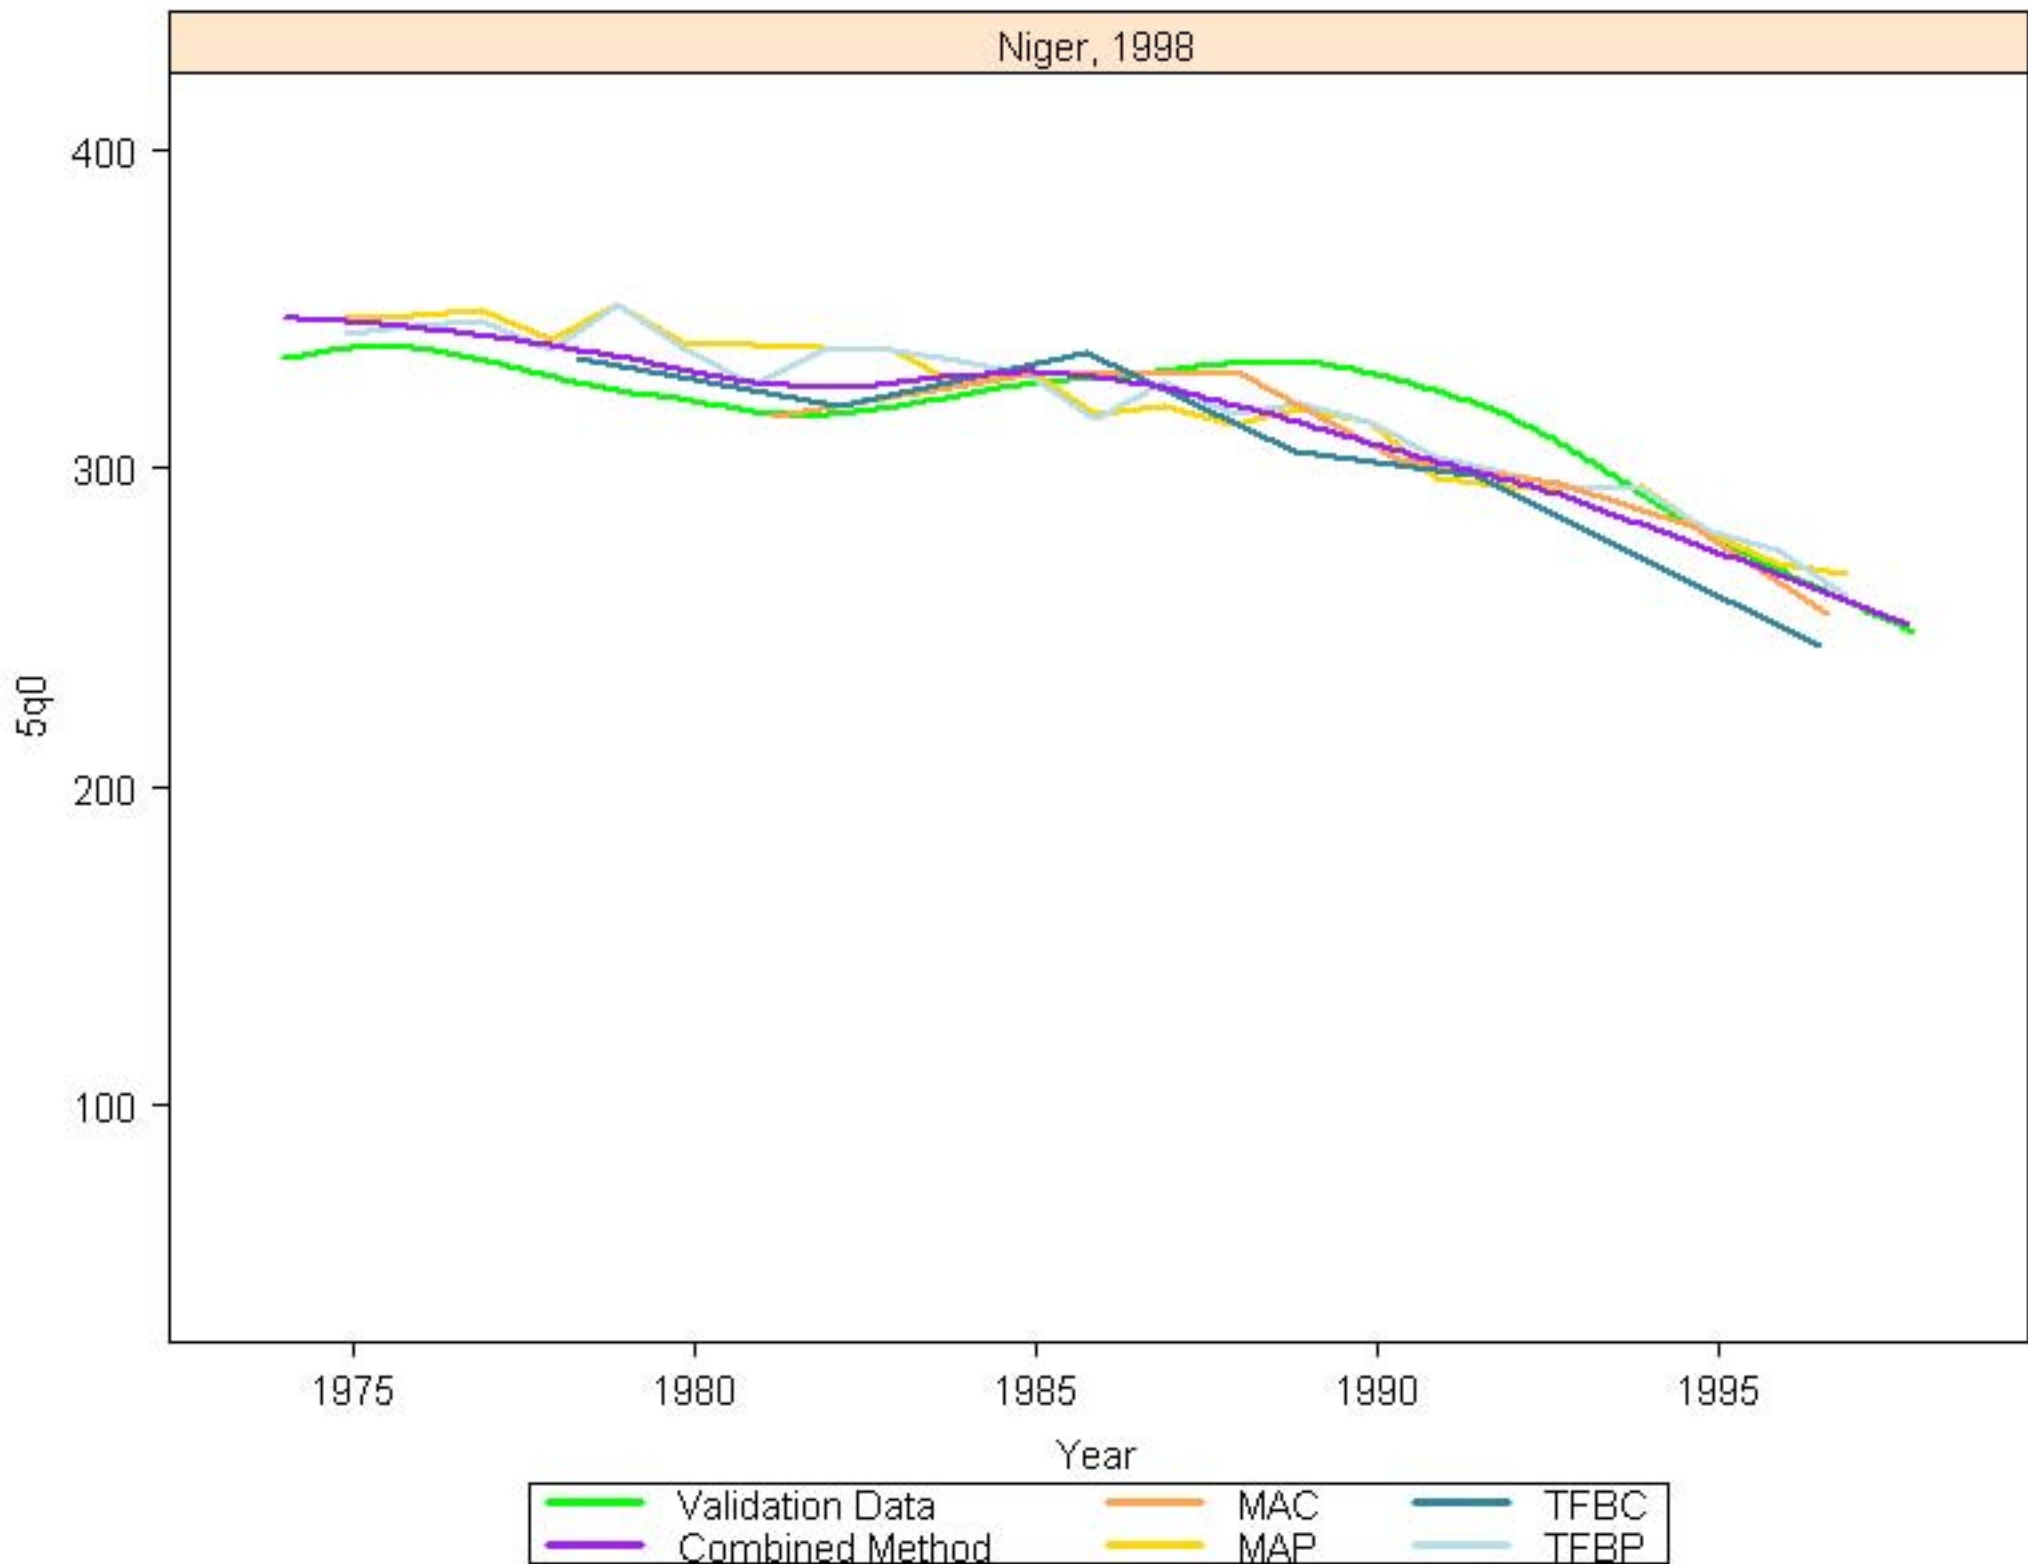

Niger, 2006

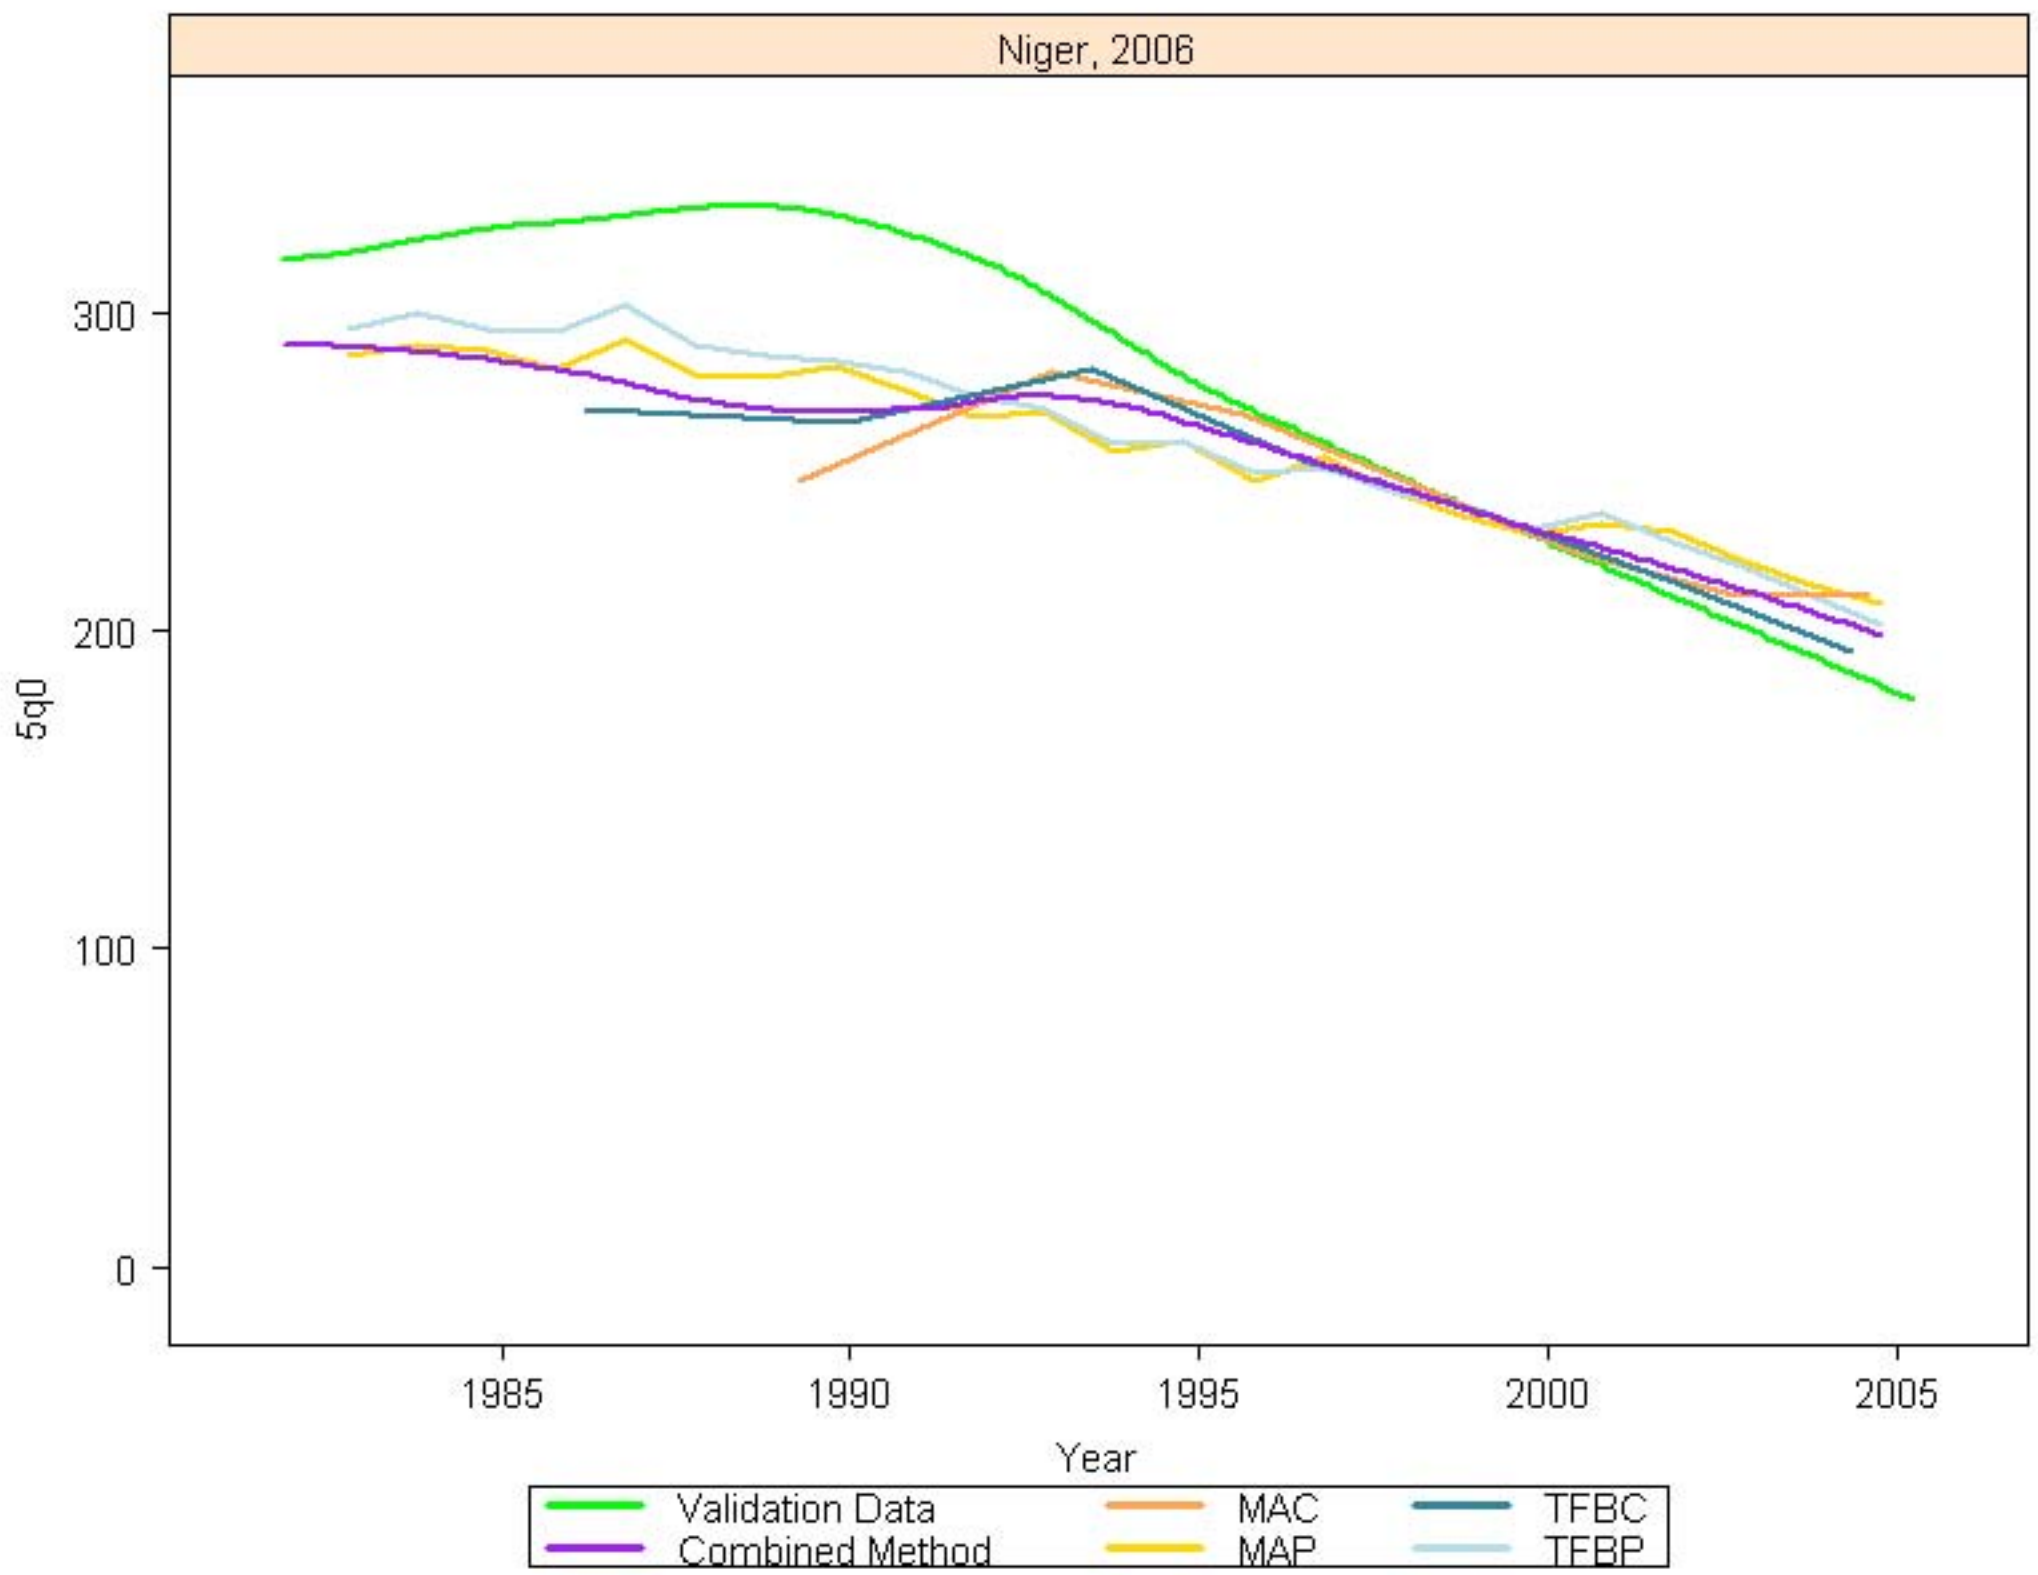

# Nigeria, 1991

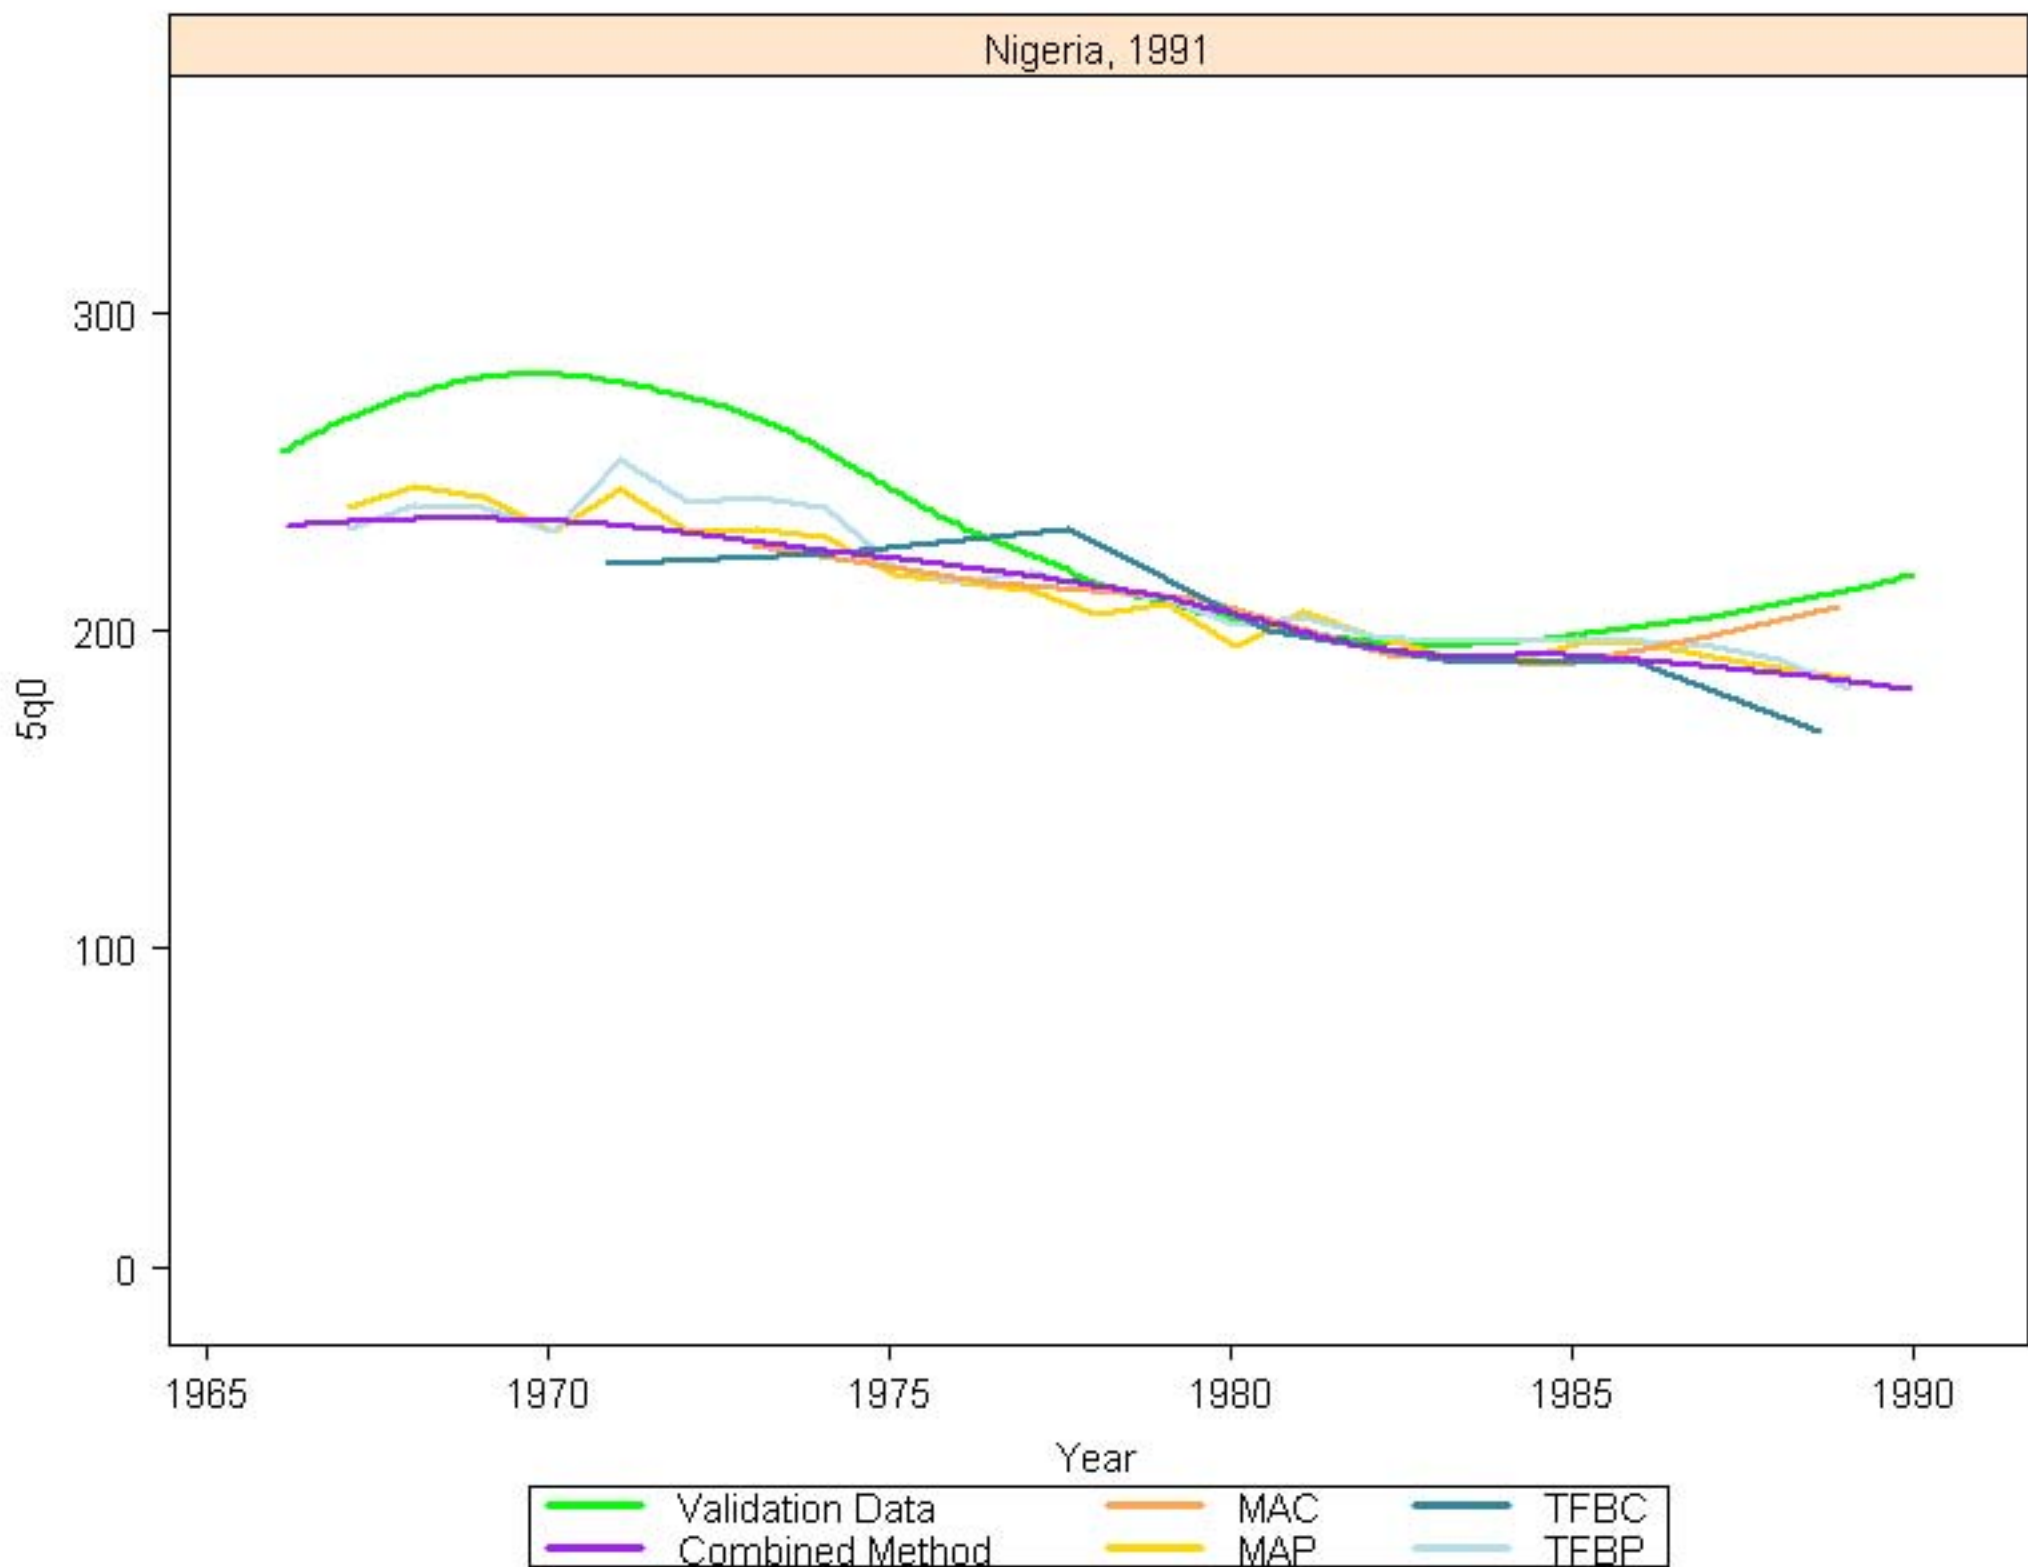

Nigeria, 2003

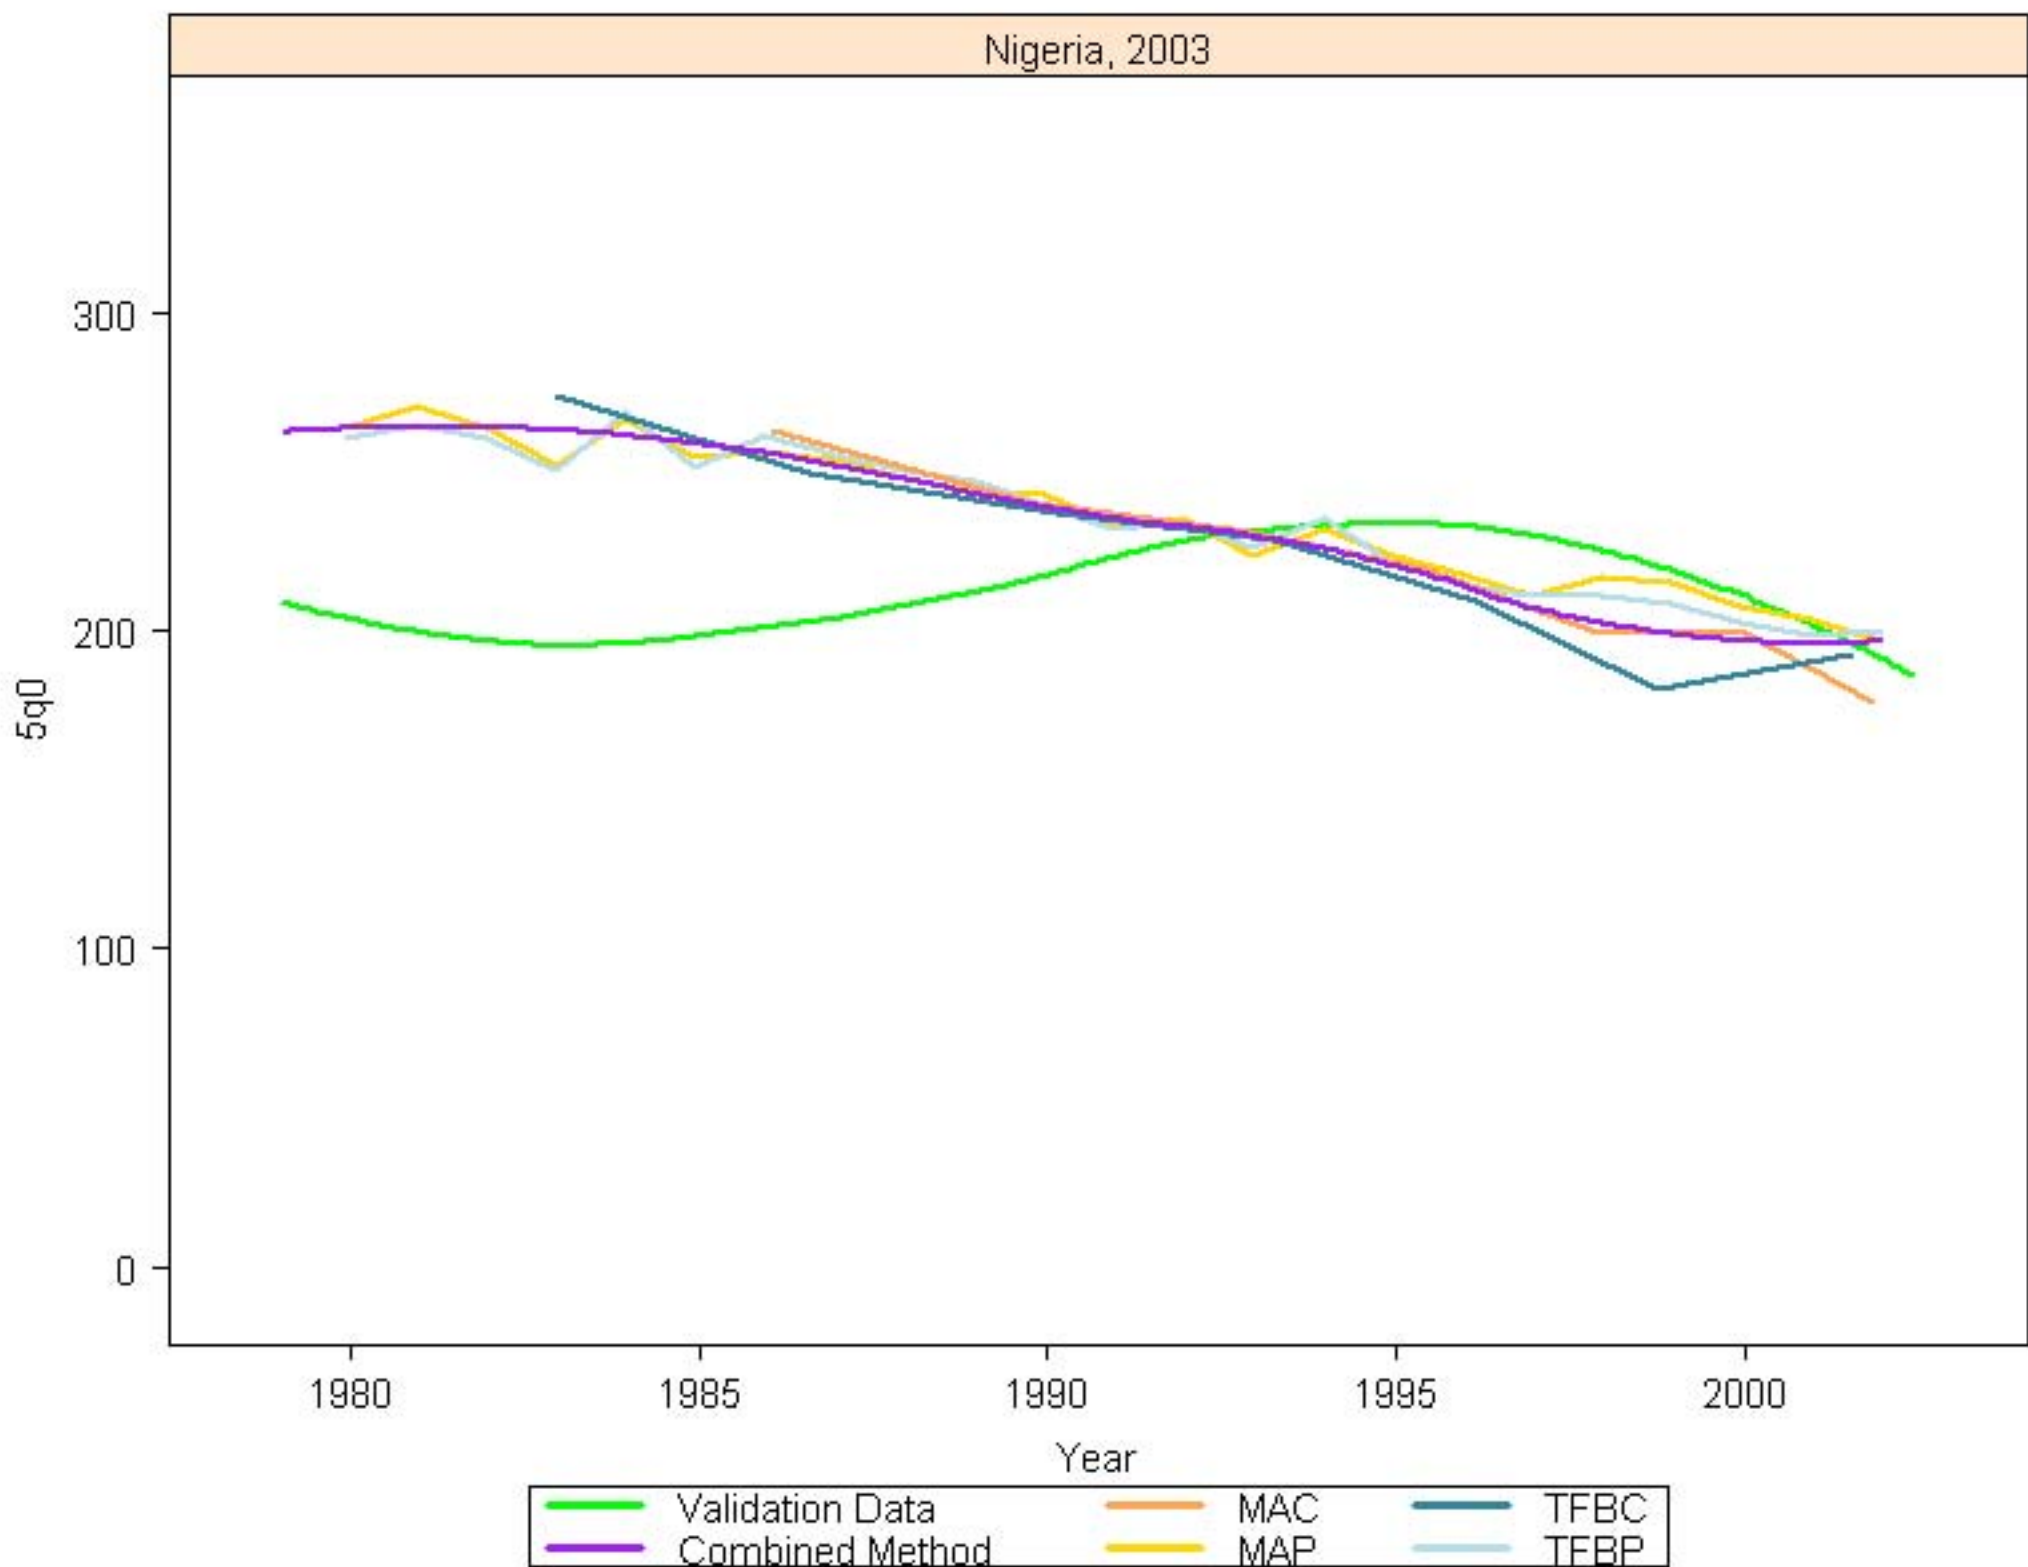

Pakistan, 1991

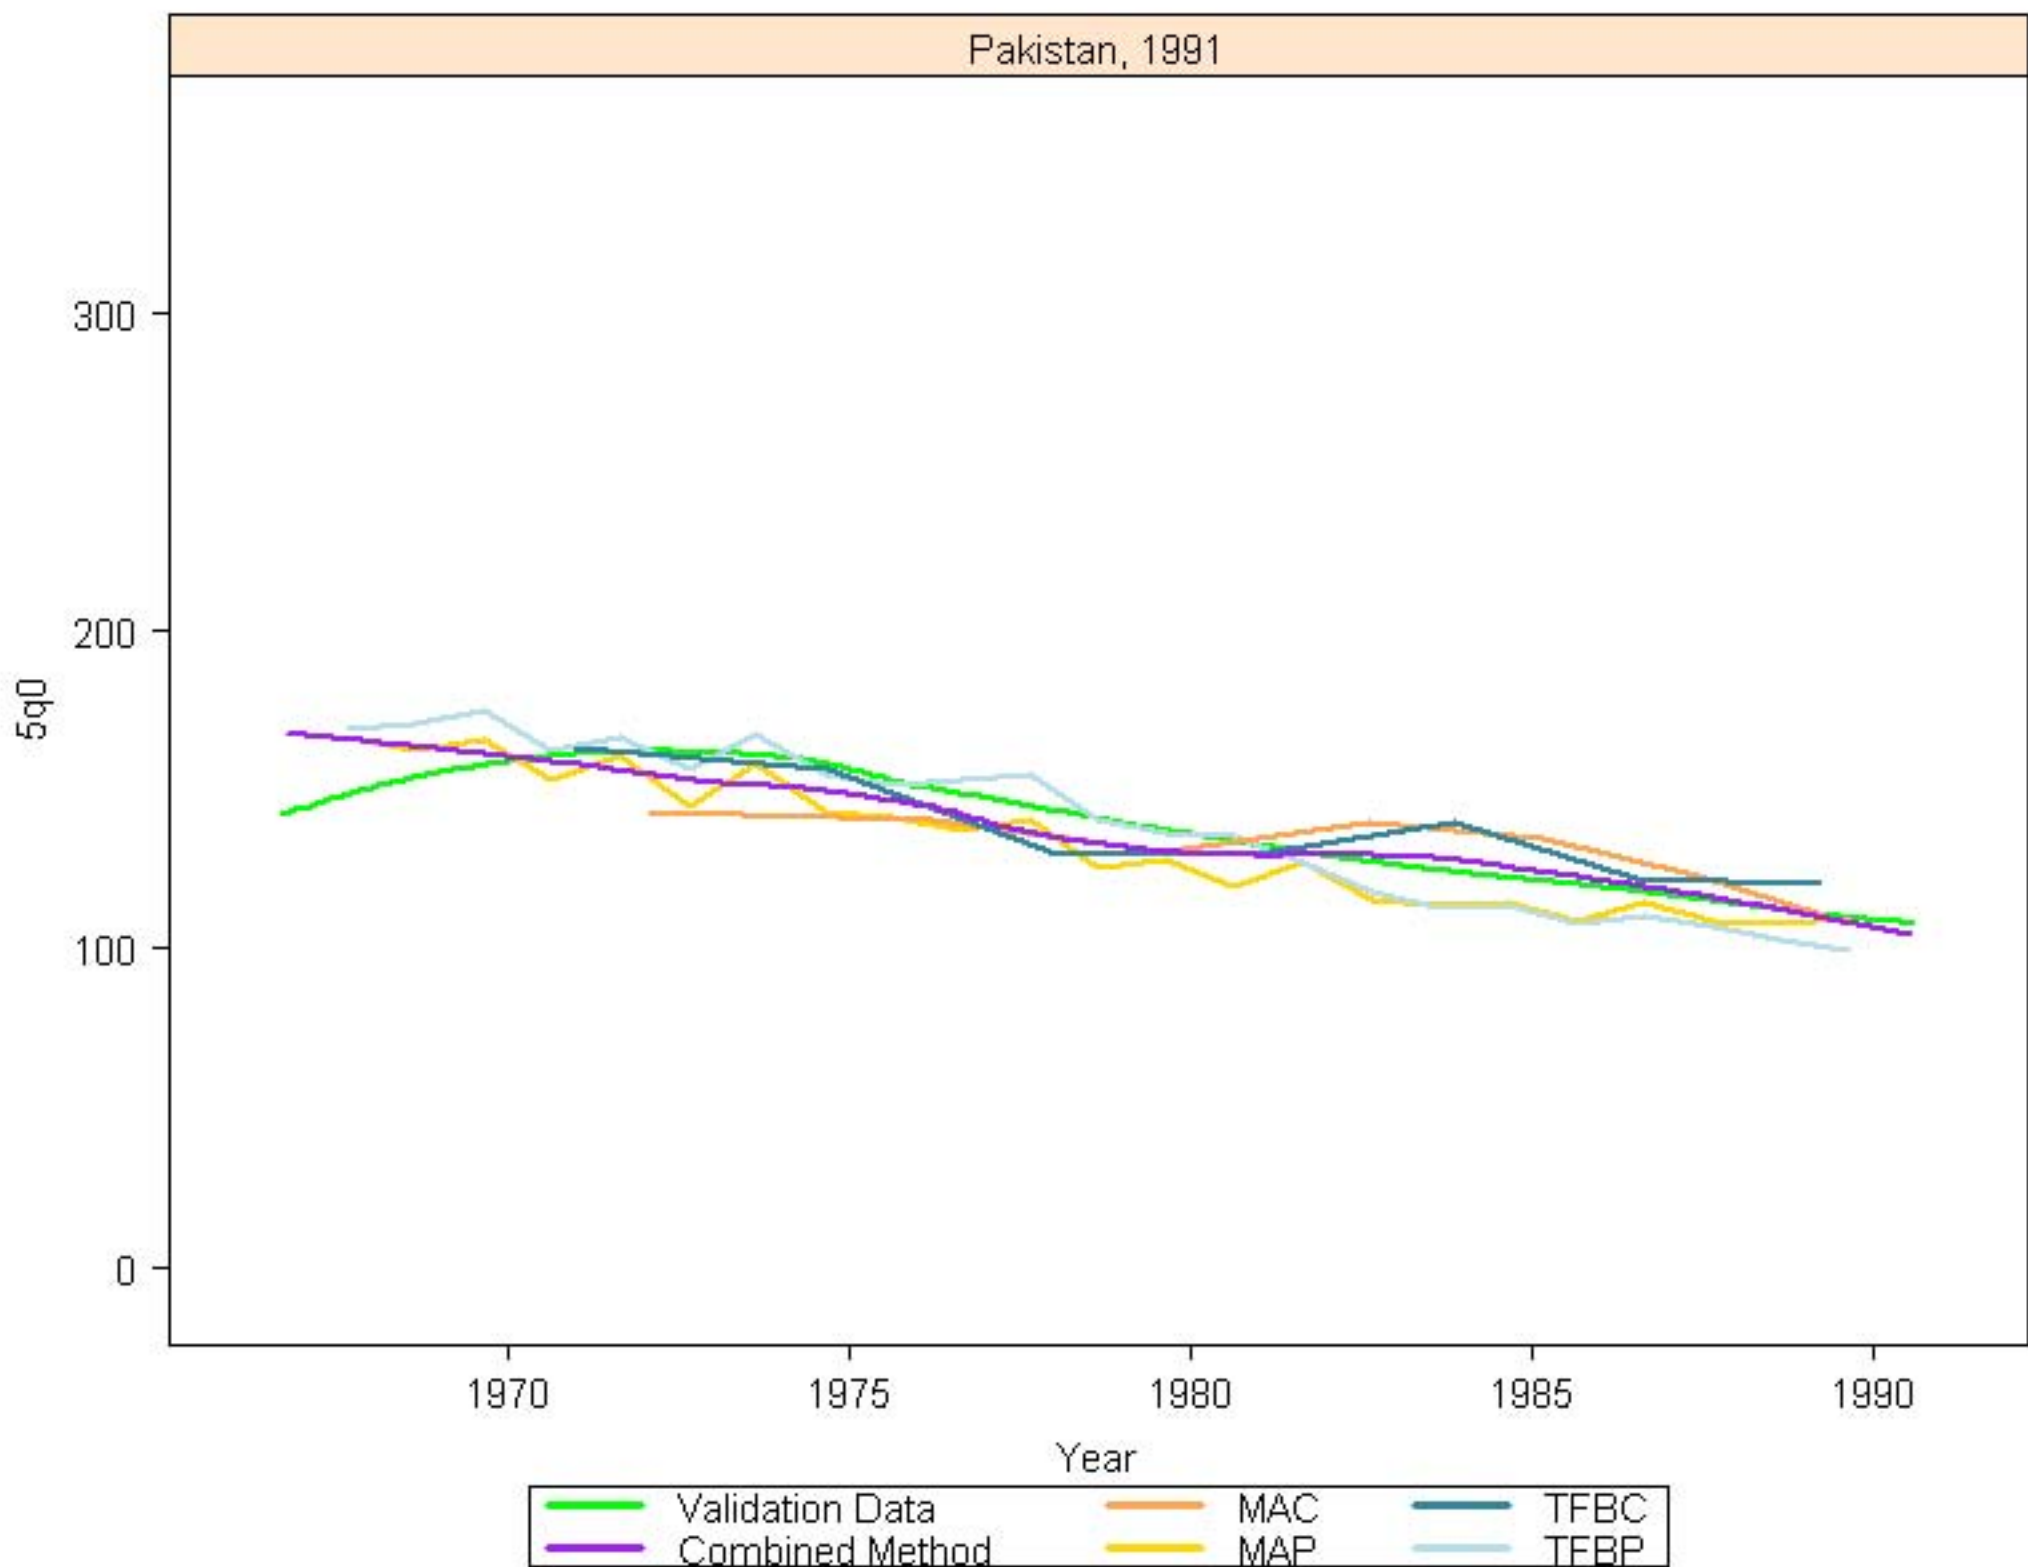

Pakistan, 2007

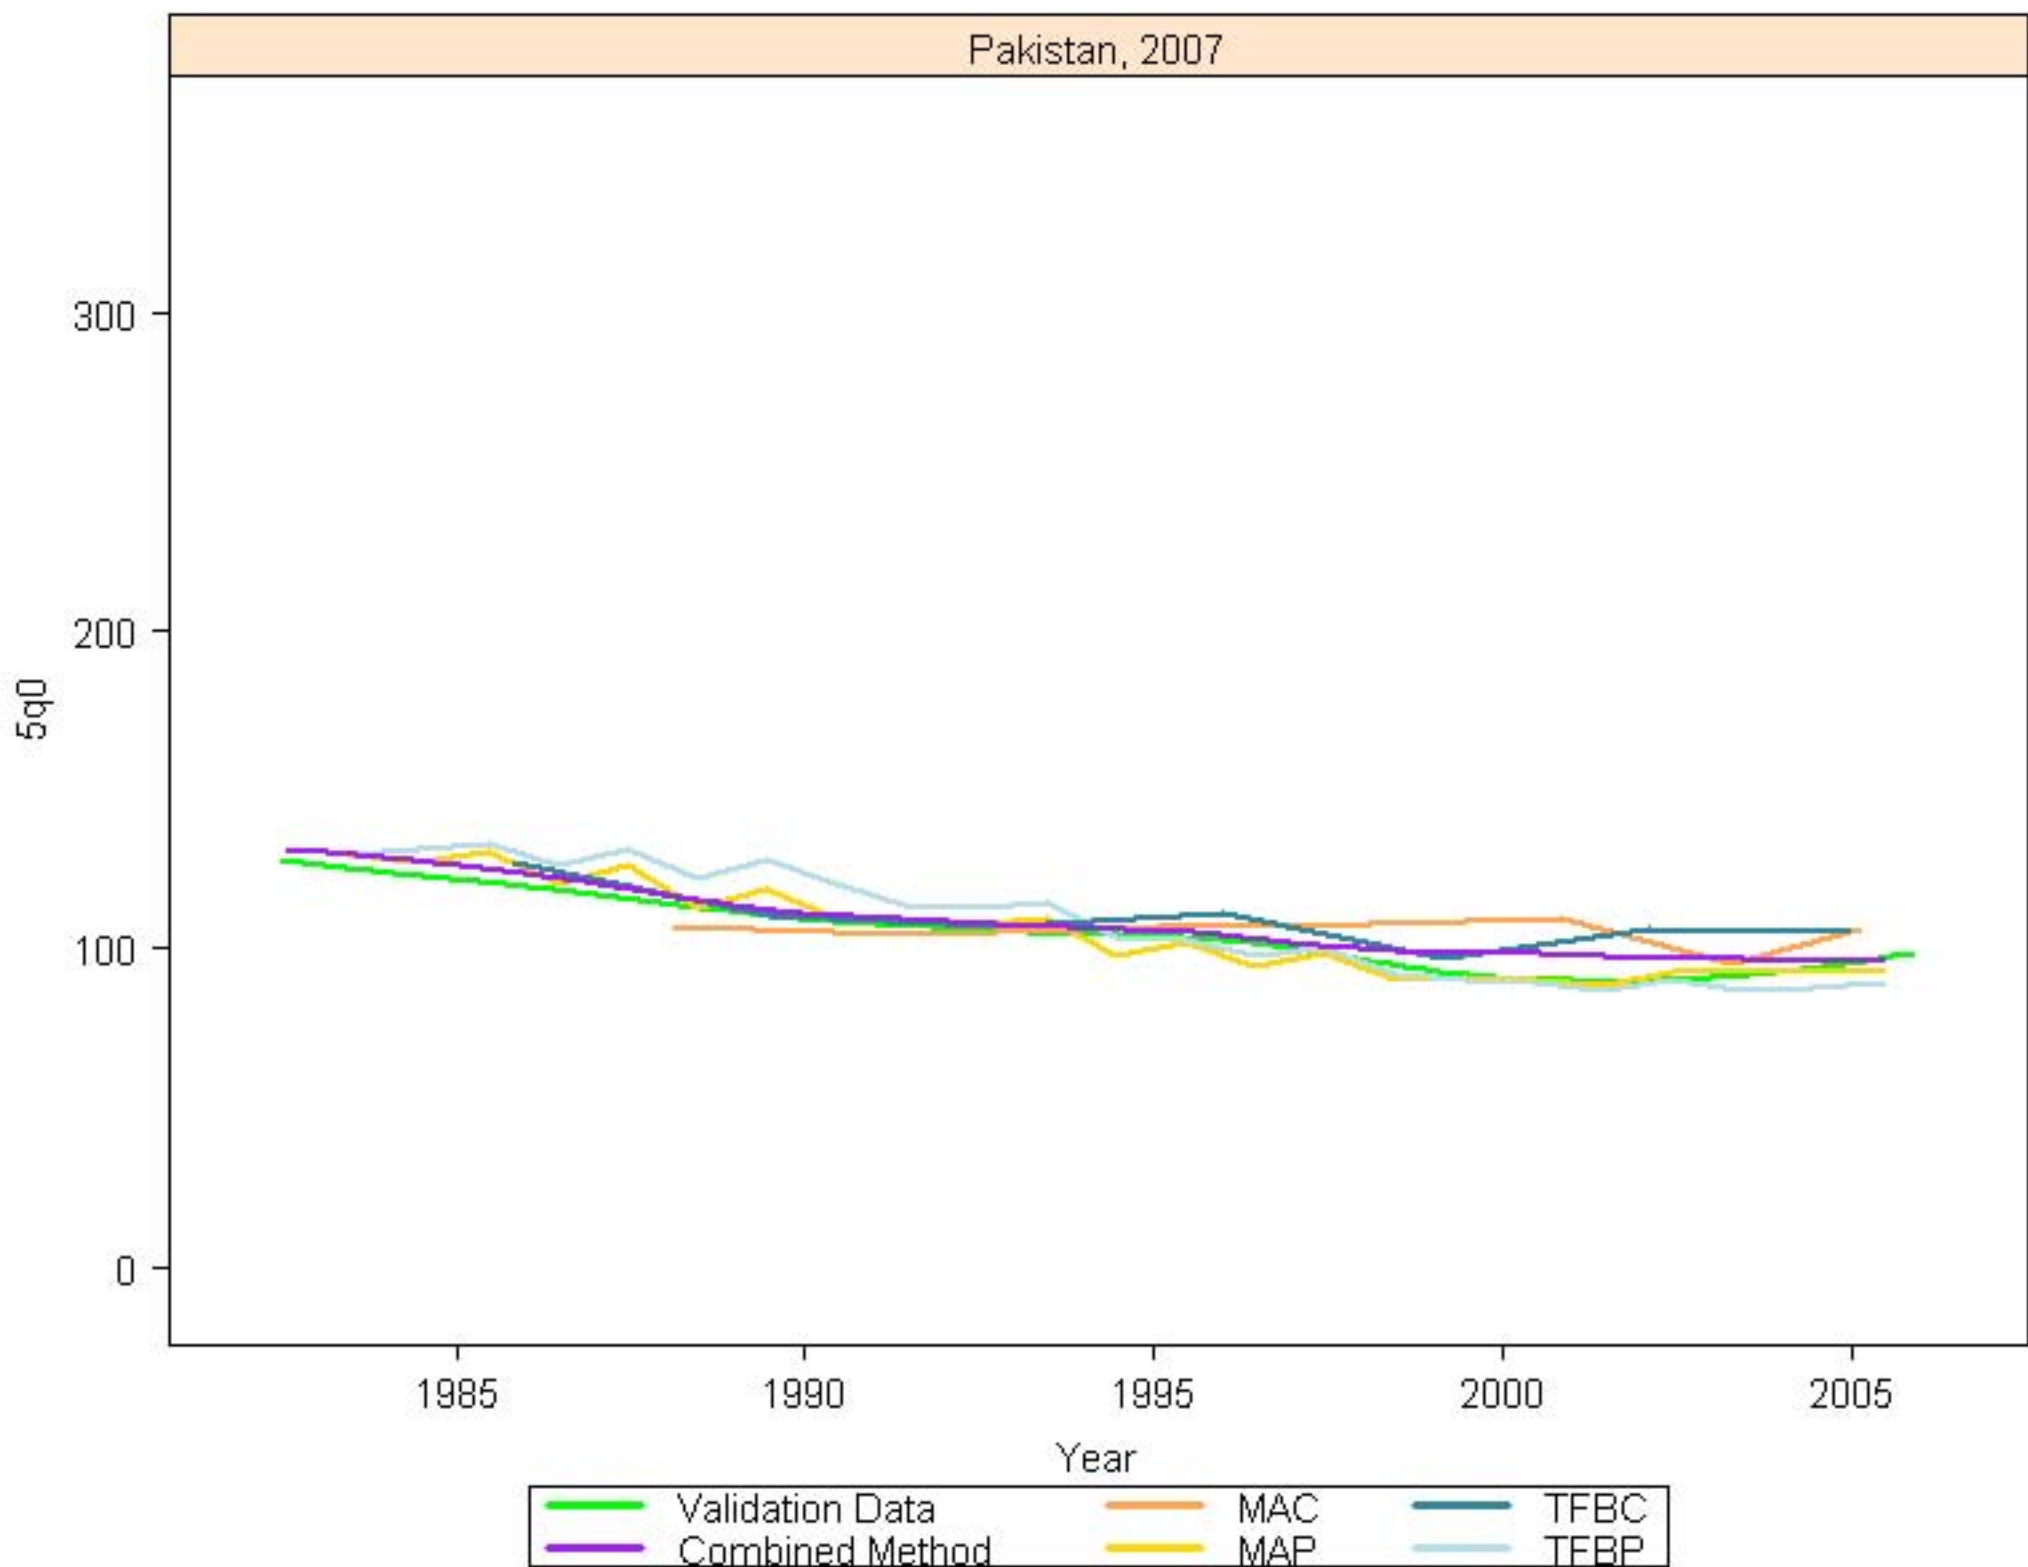

Paraguay, 1991

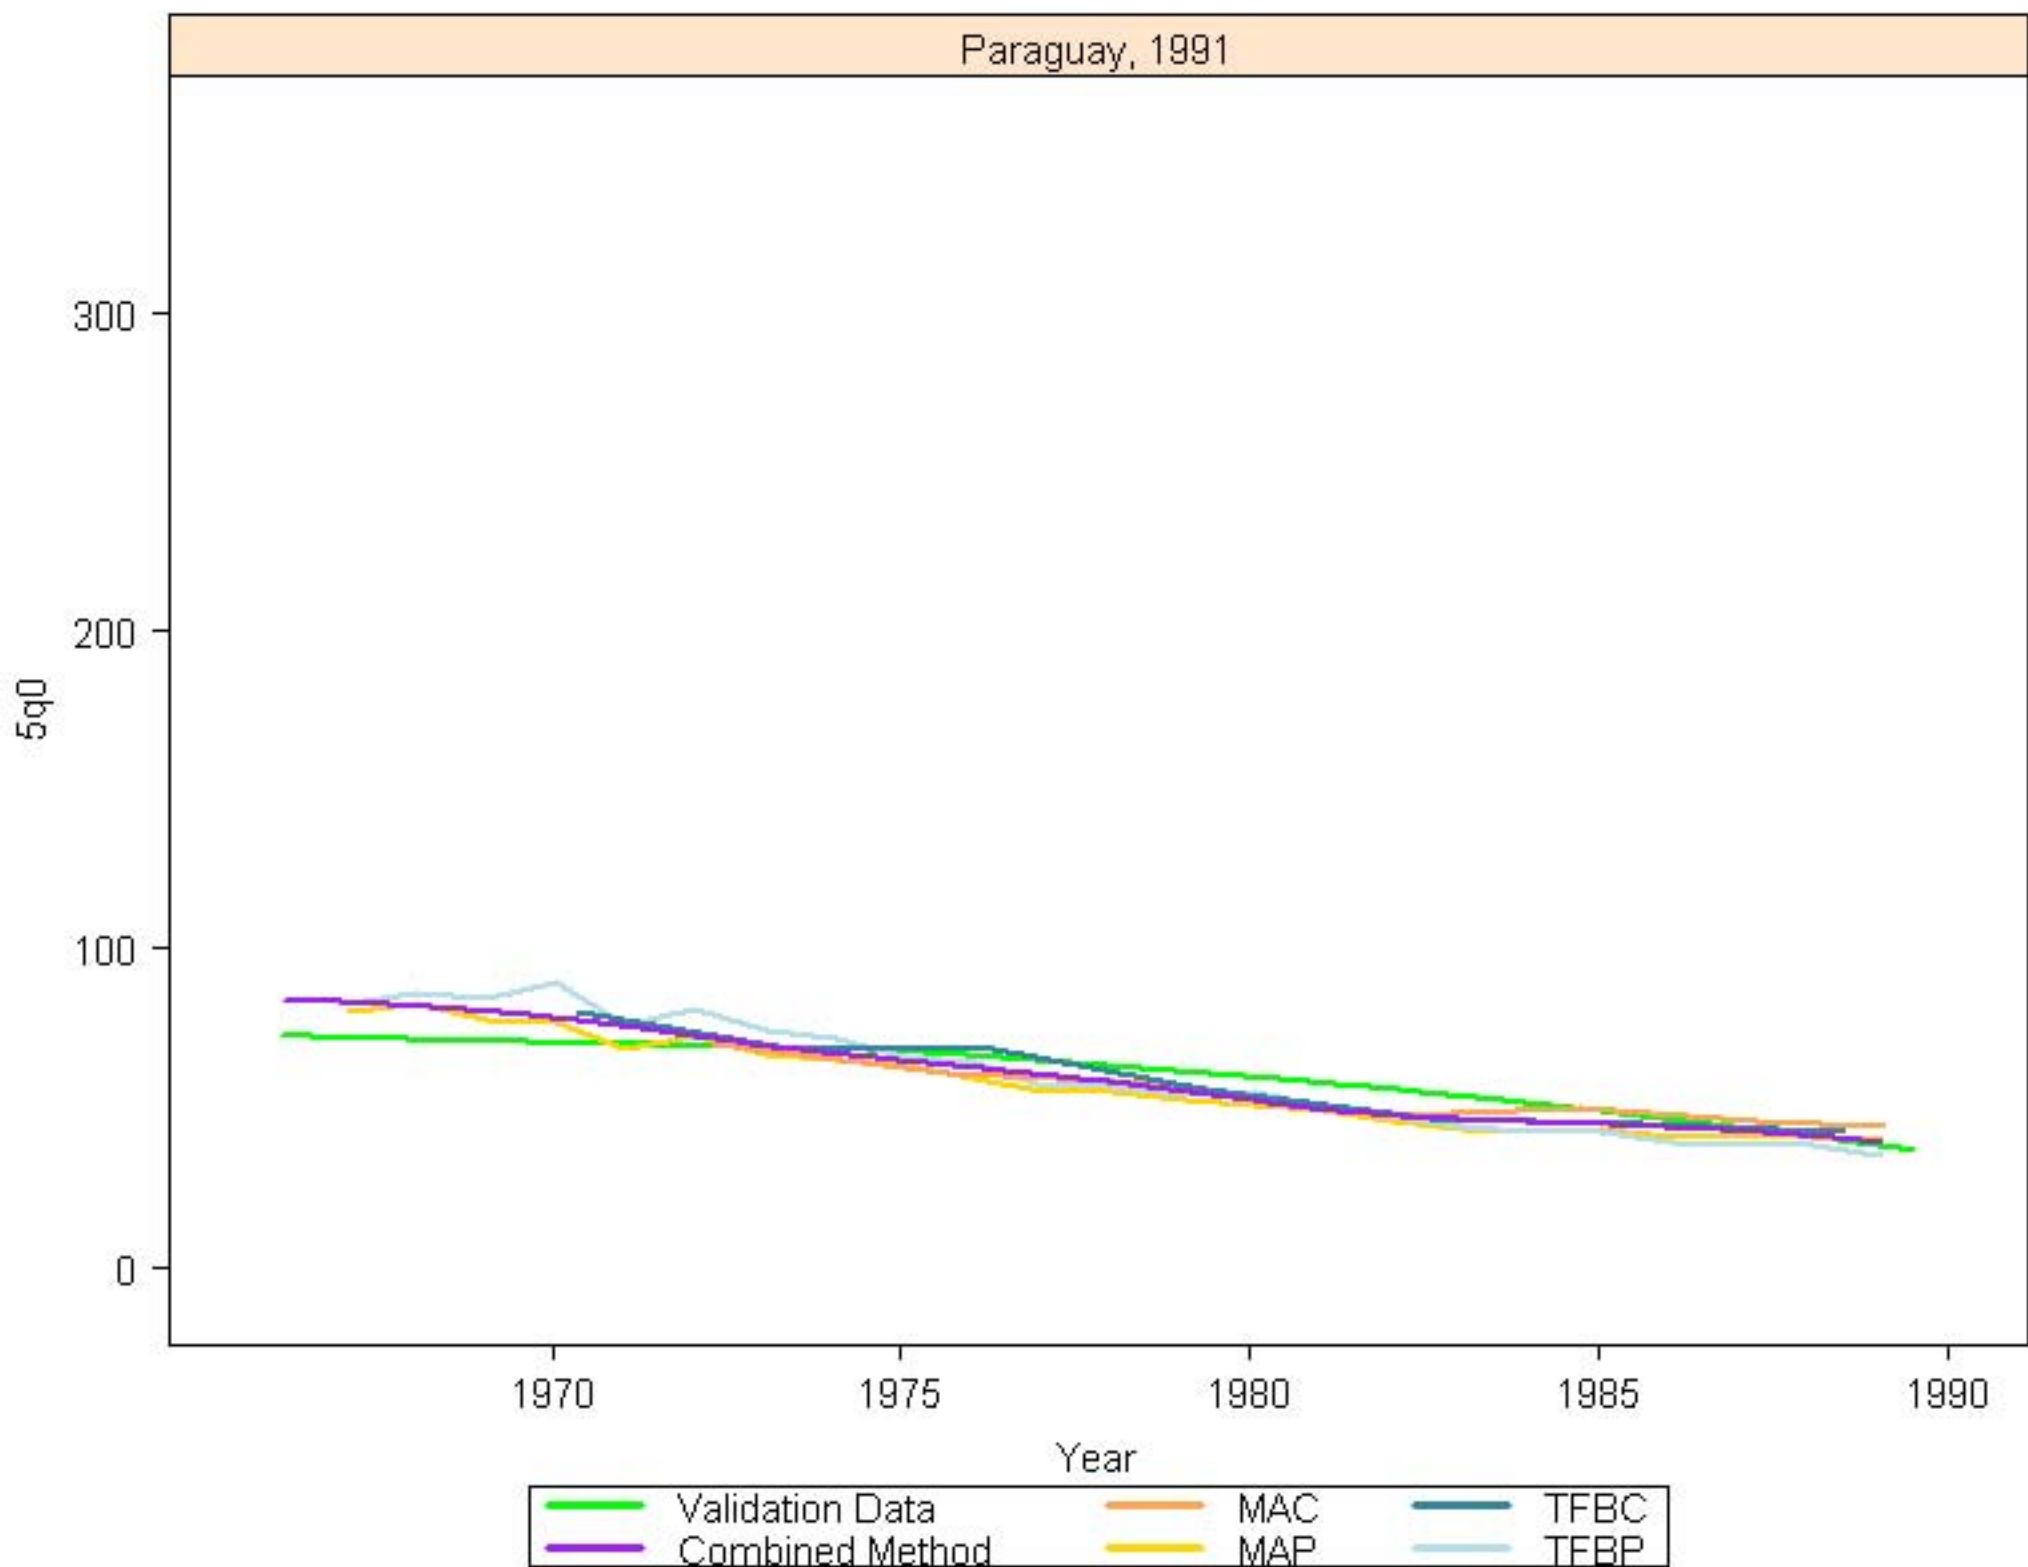



Peru, 1987

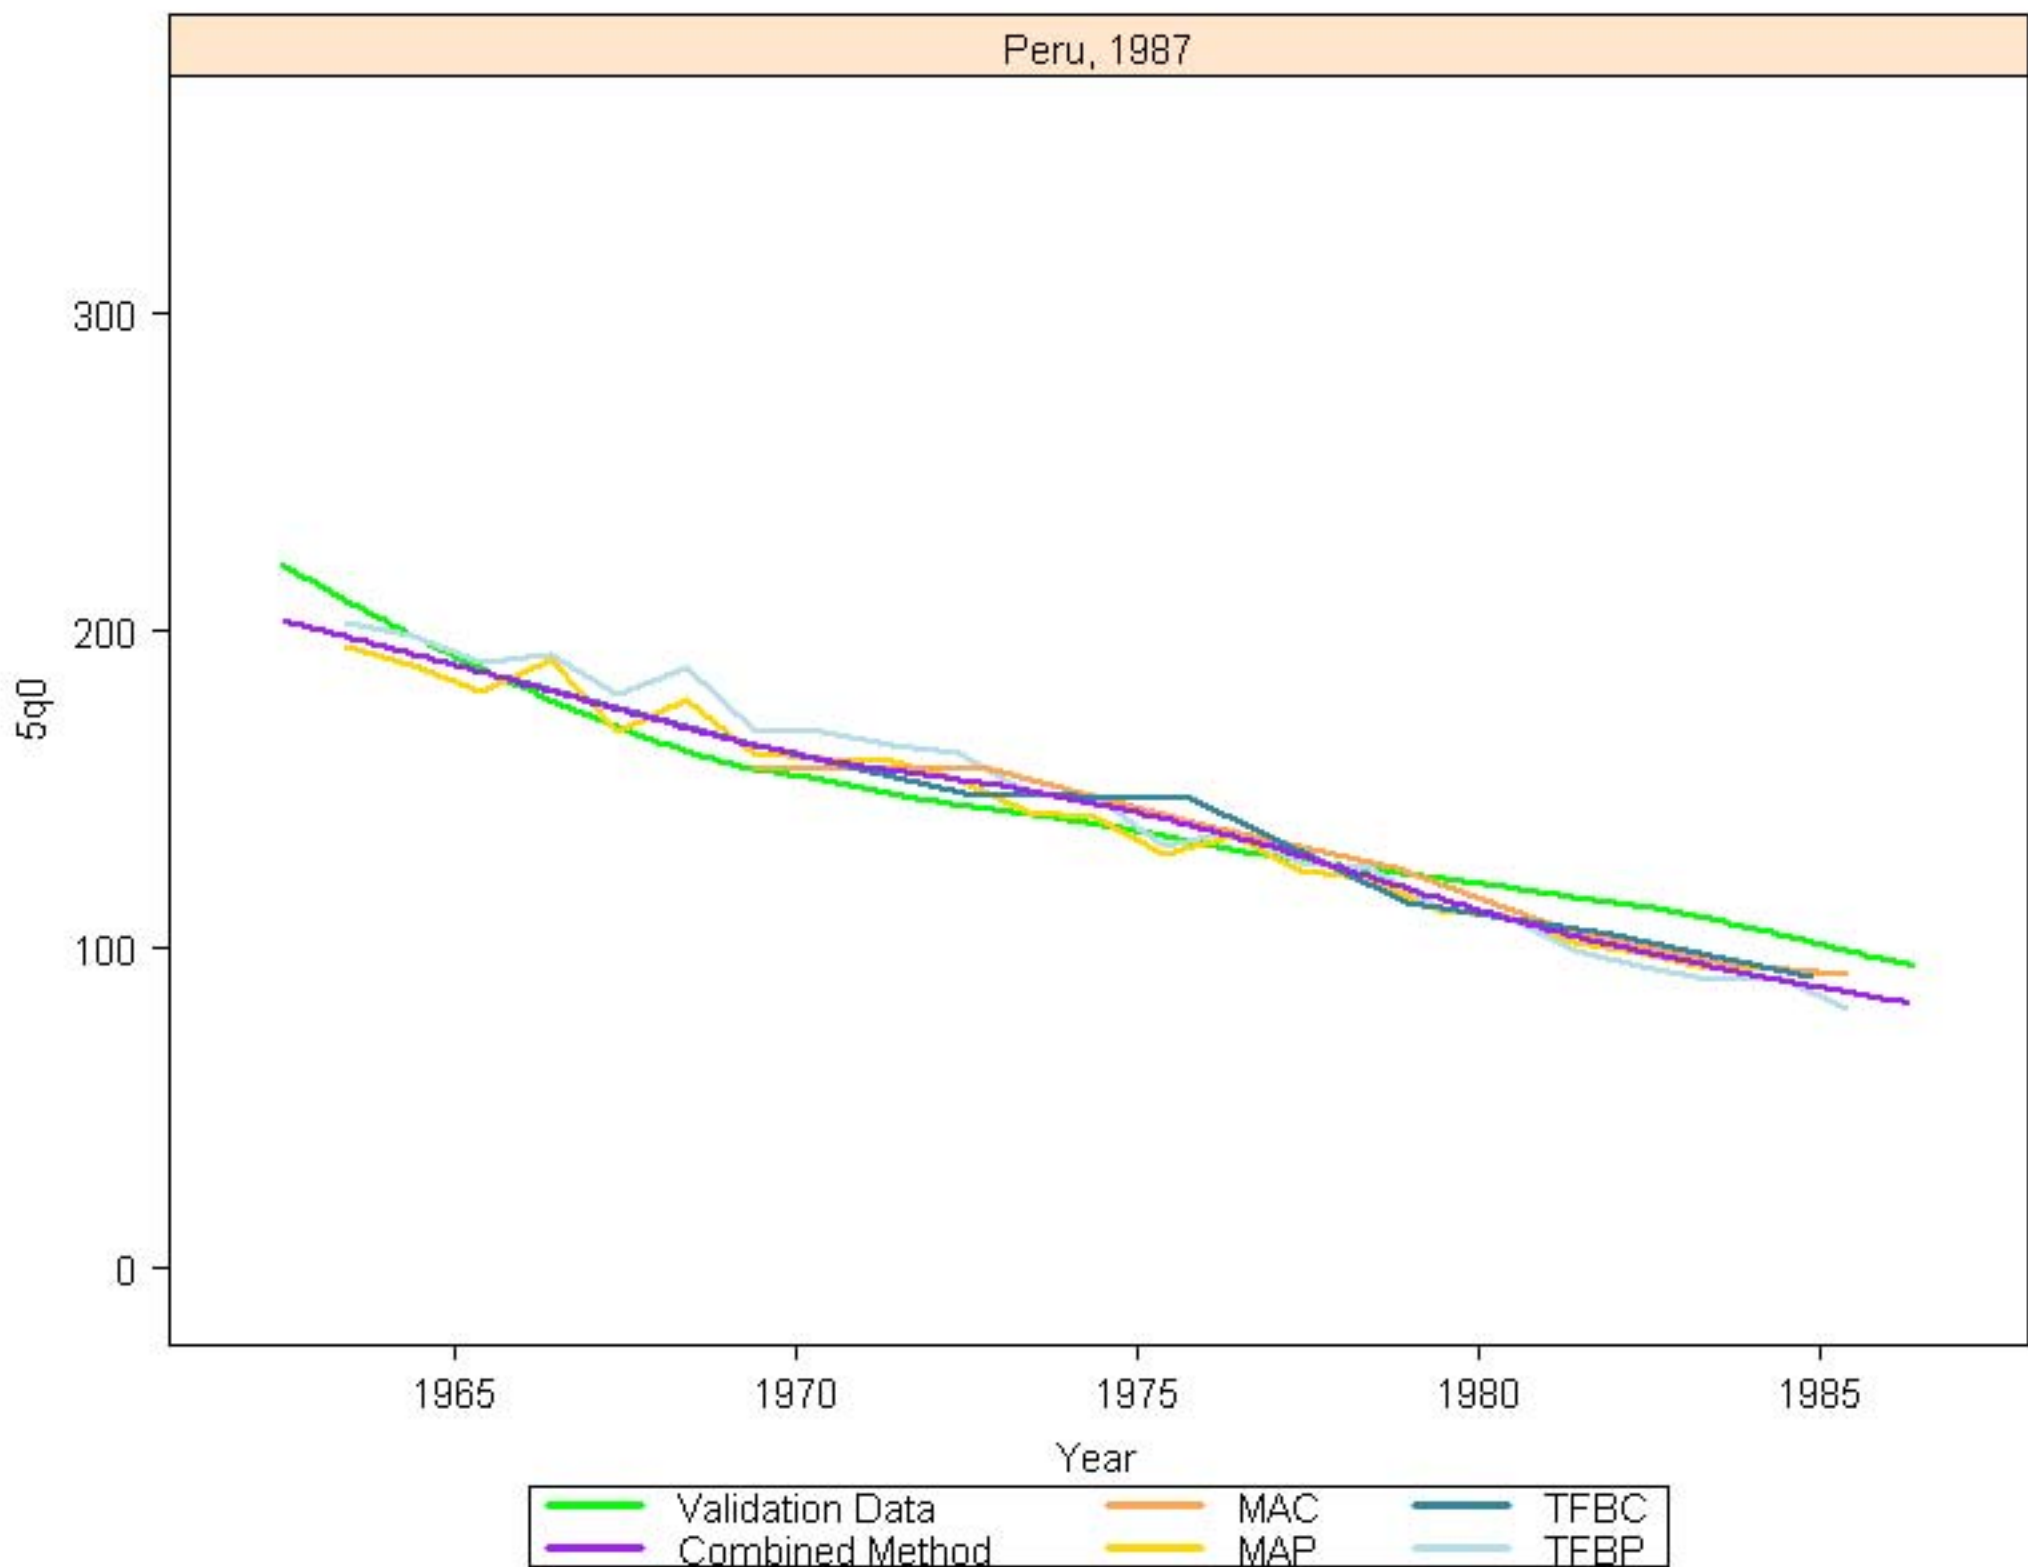

Peru, 1992

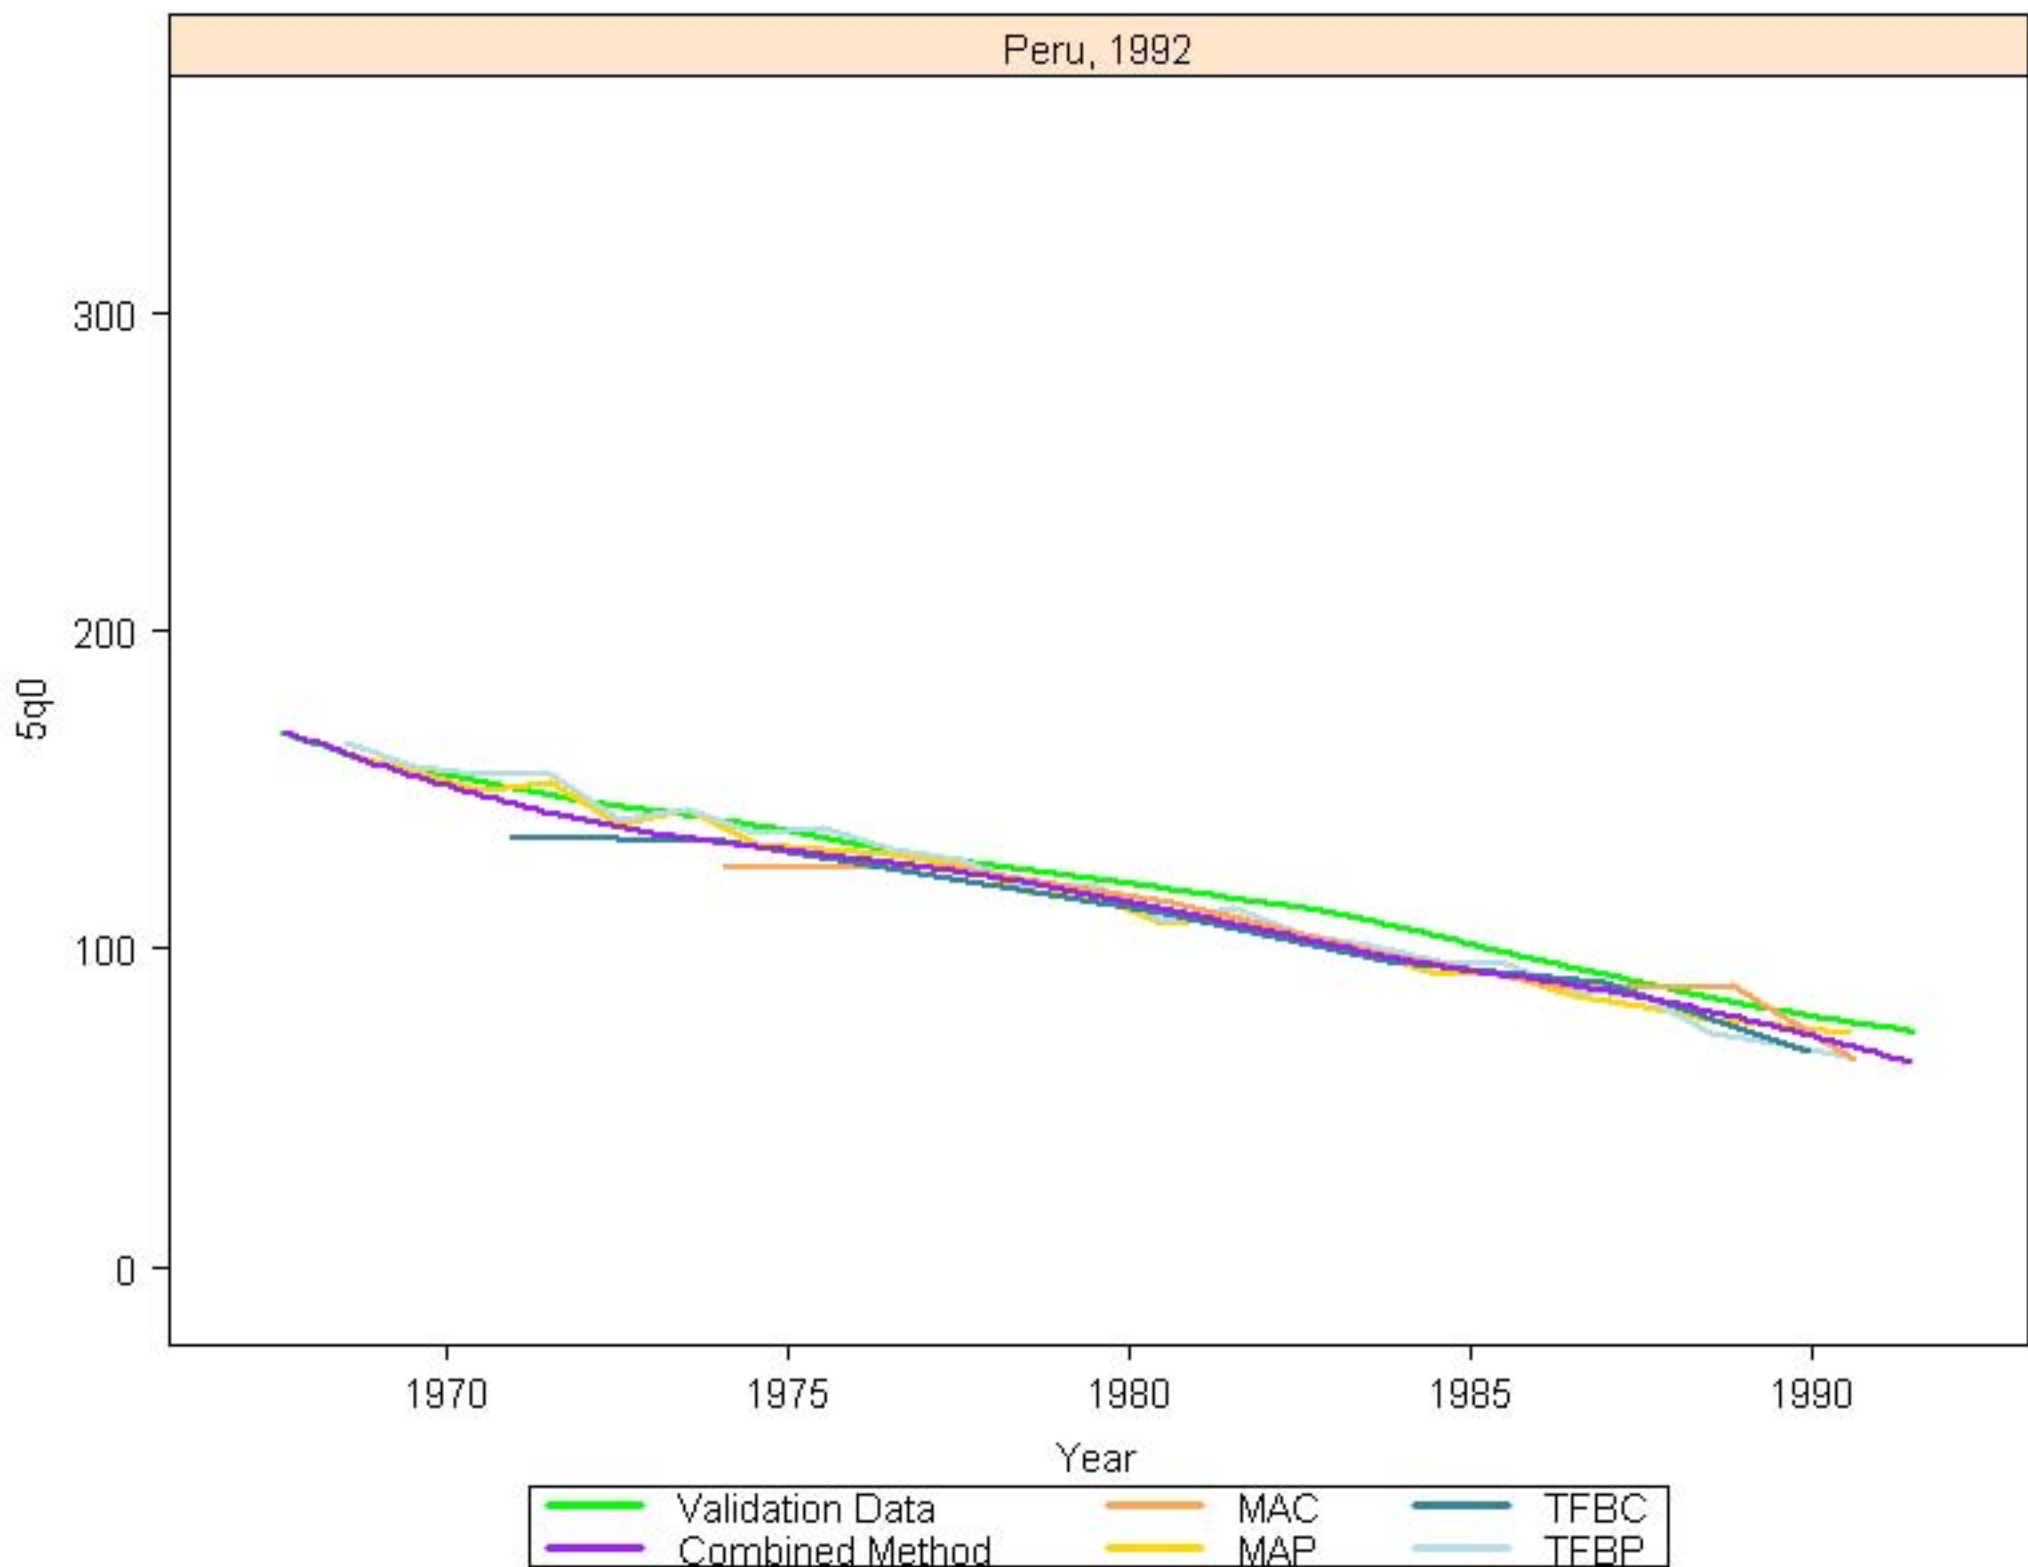

Peru, 1997

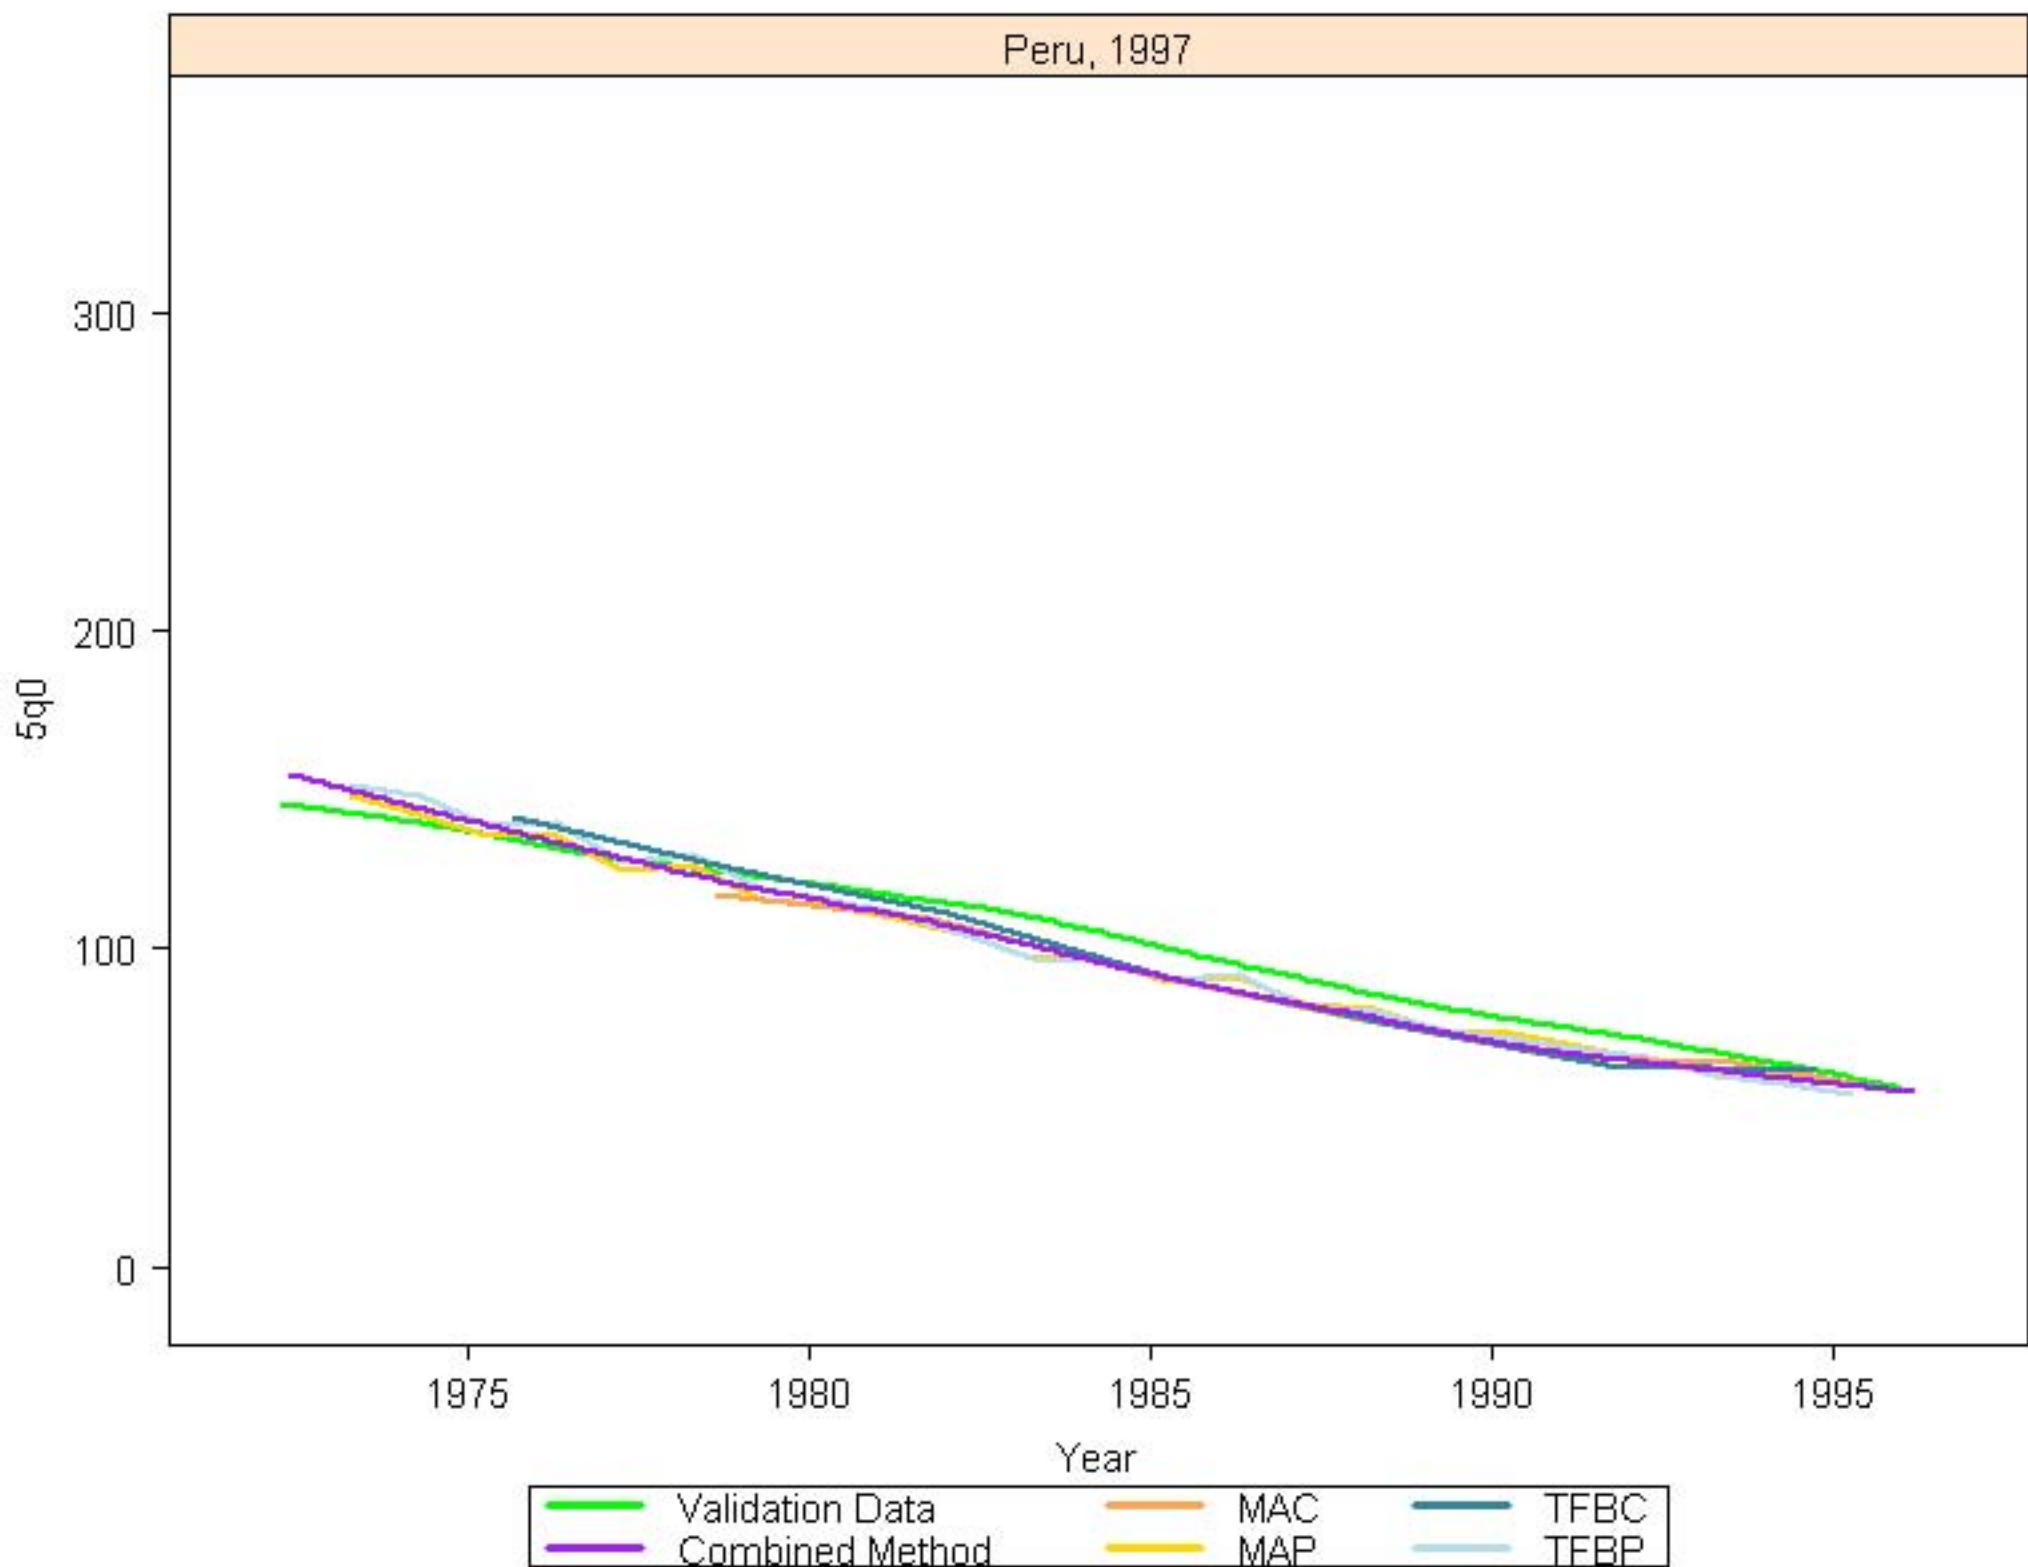

Peru, 2001

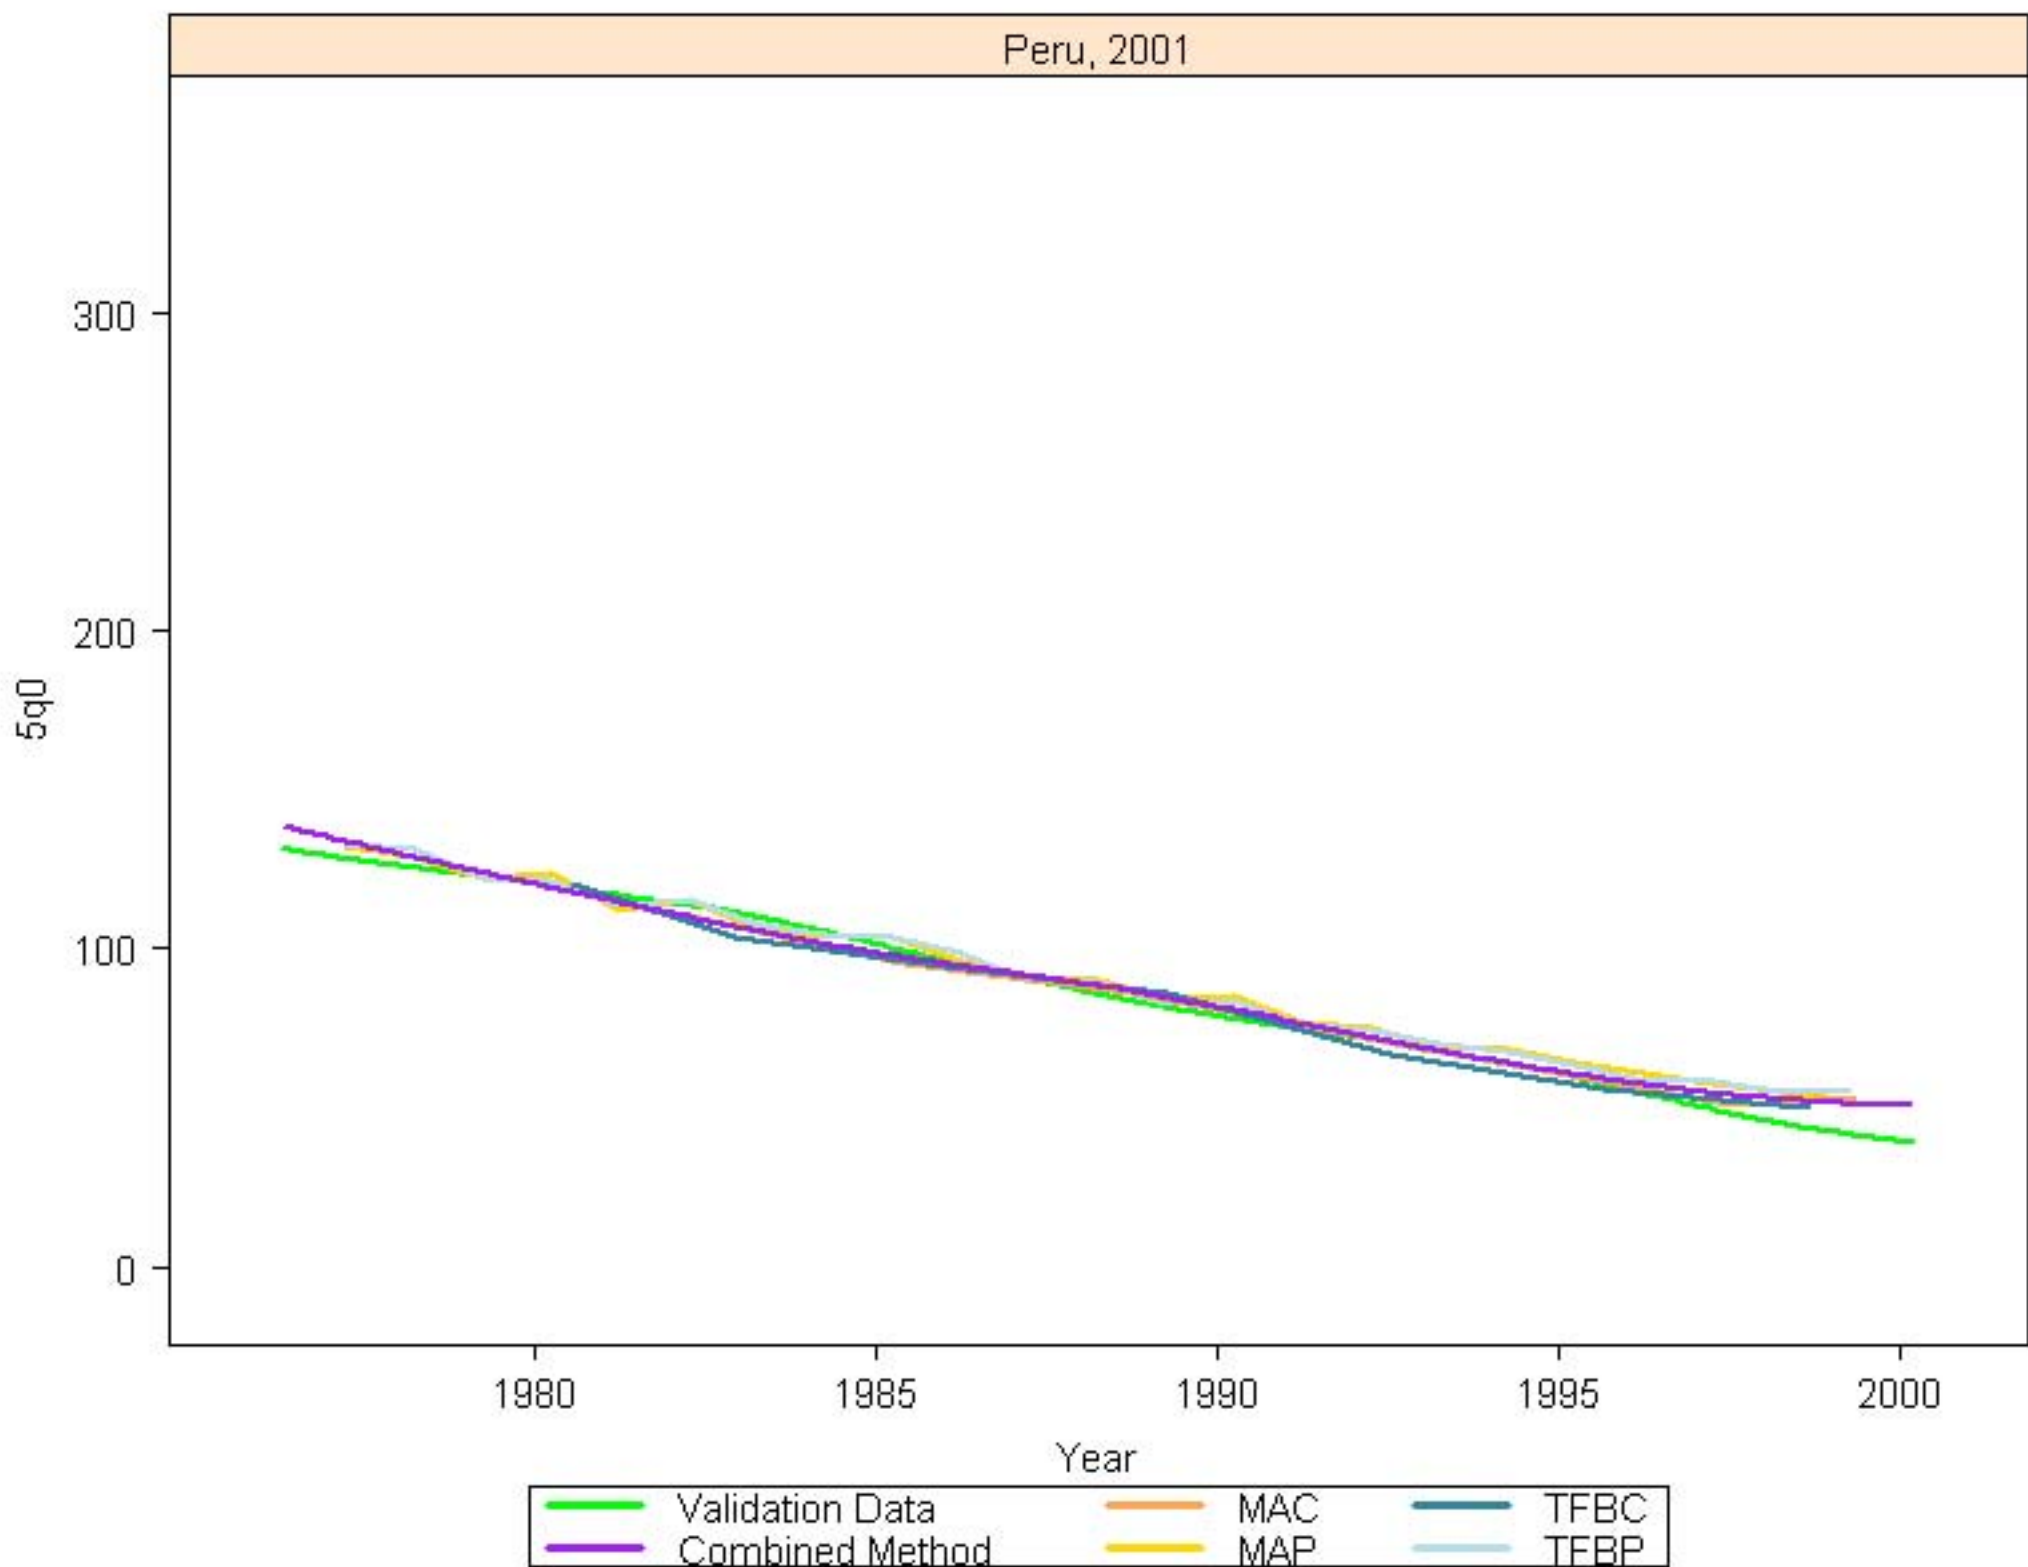

Peru, 2005

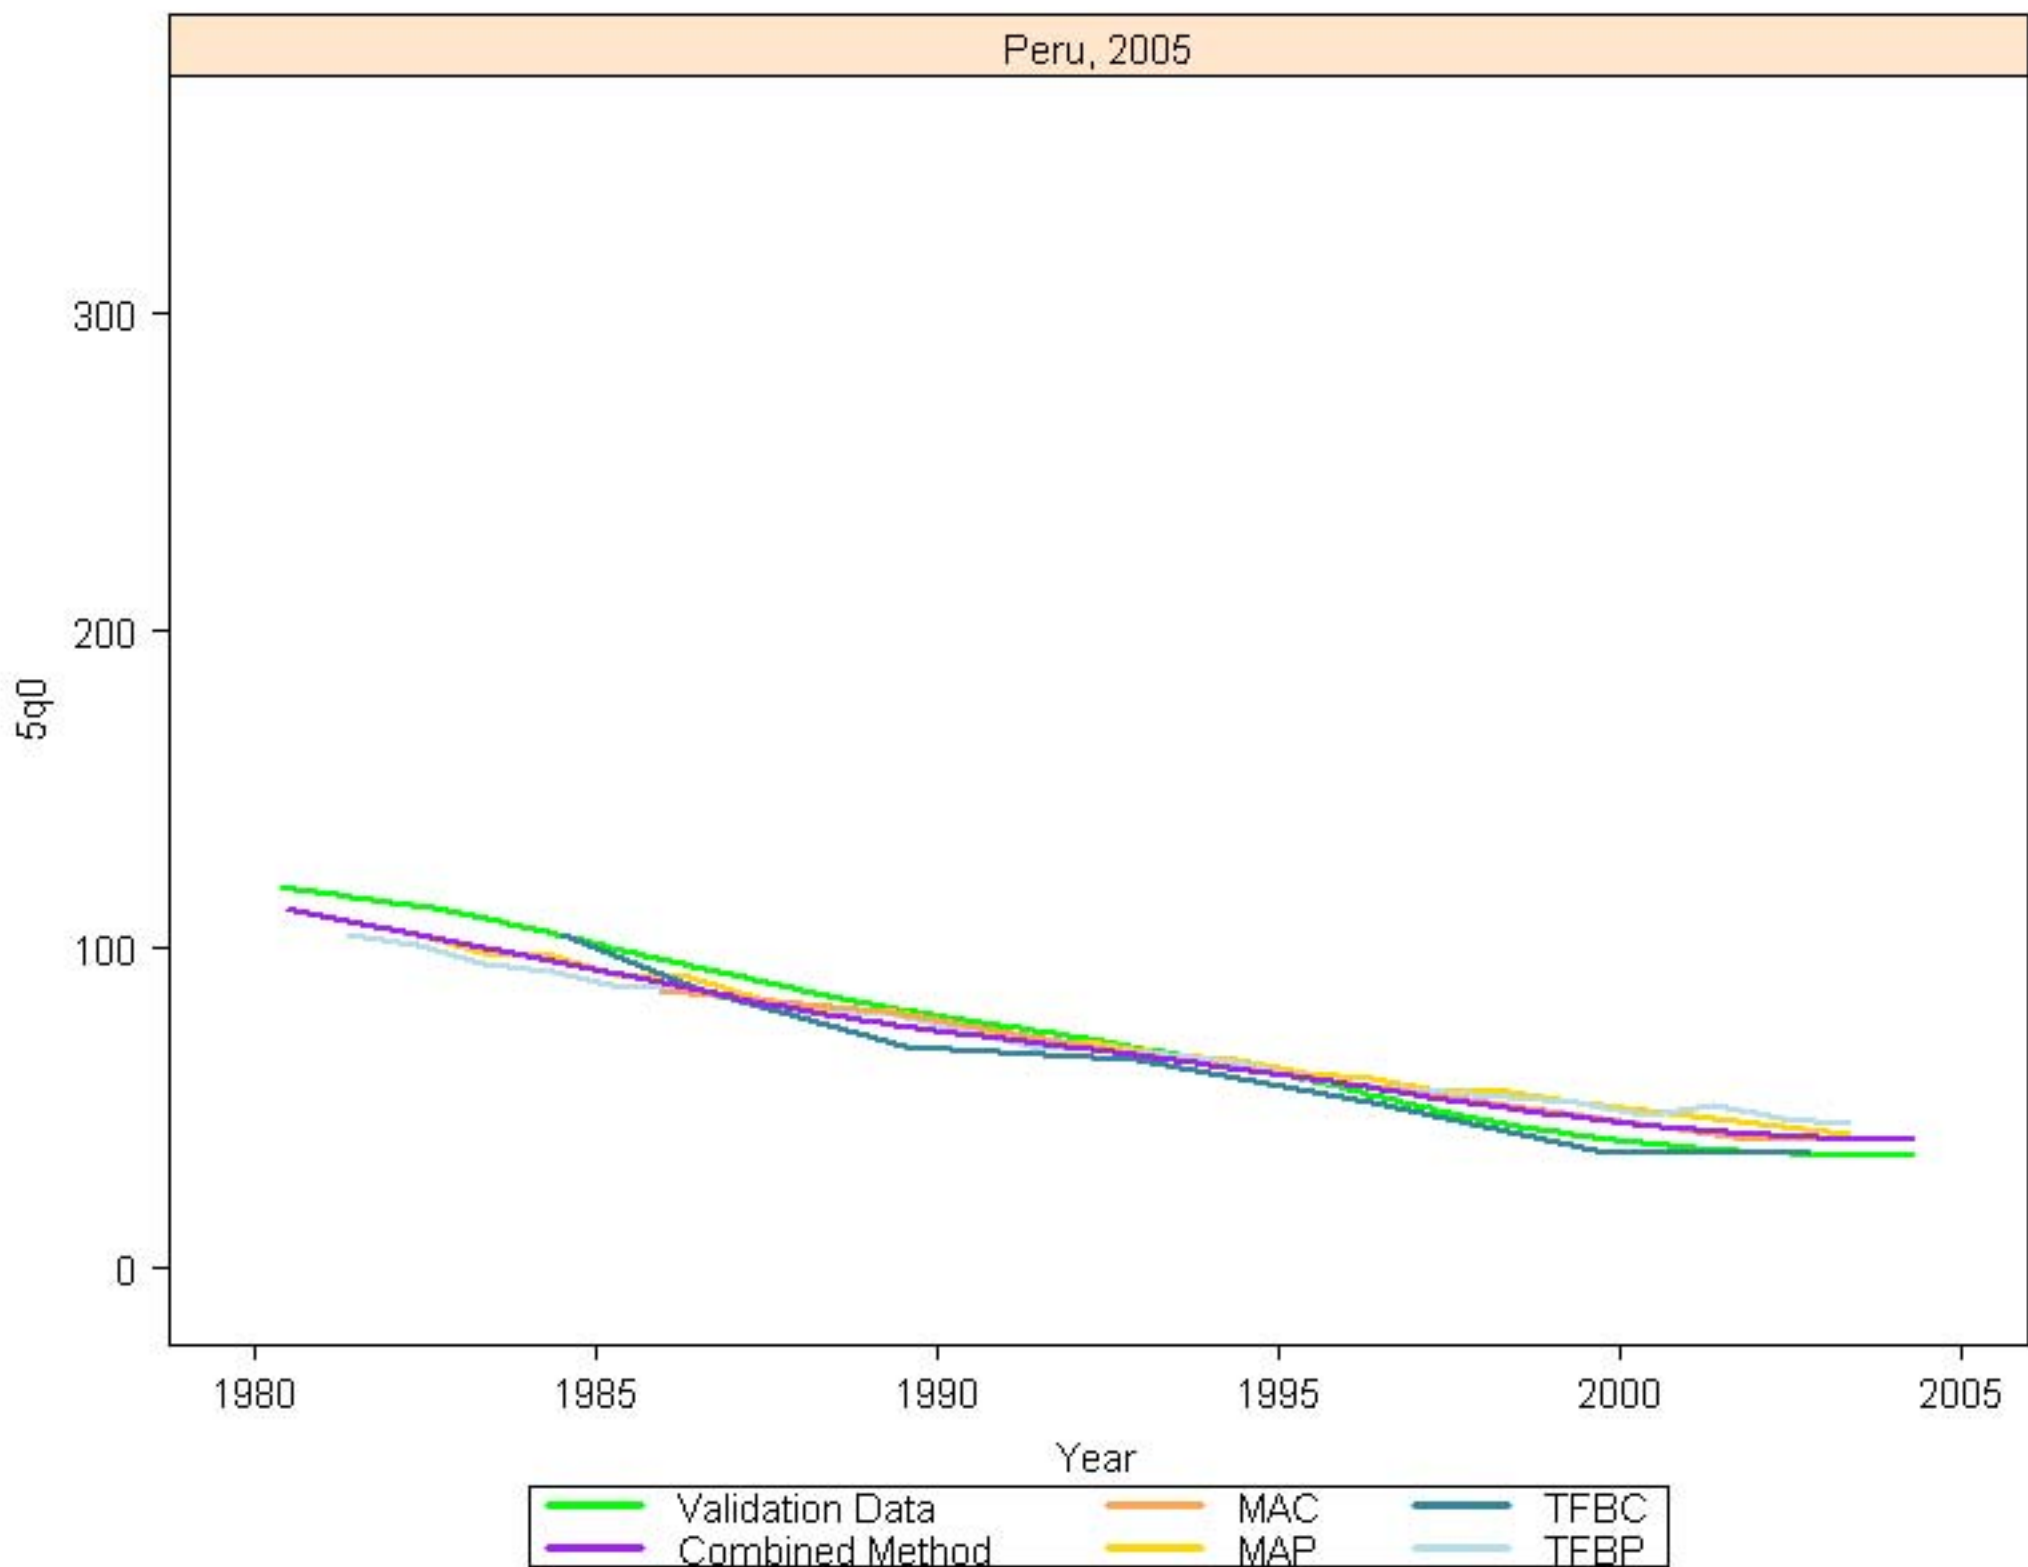

Philippines, 1993

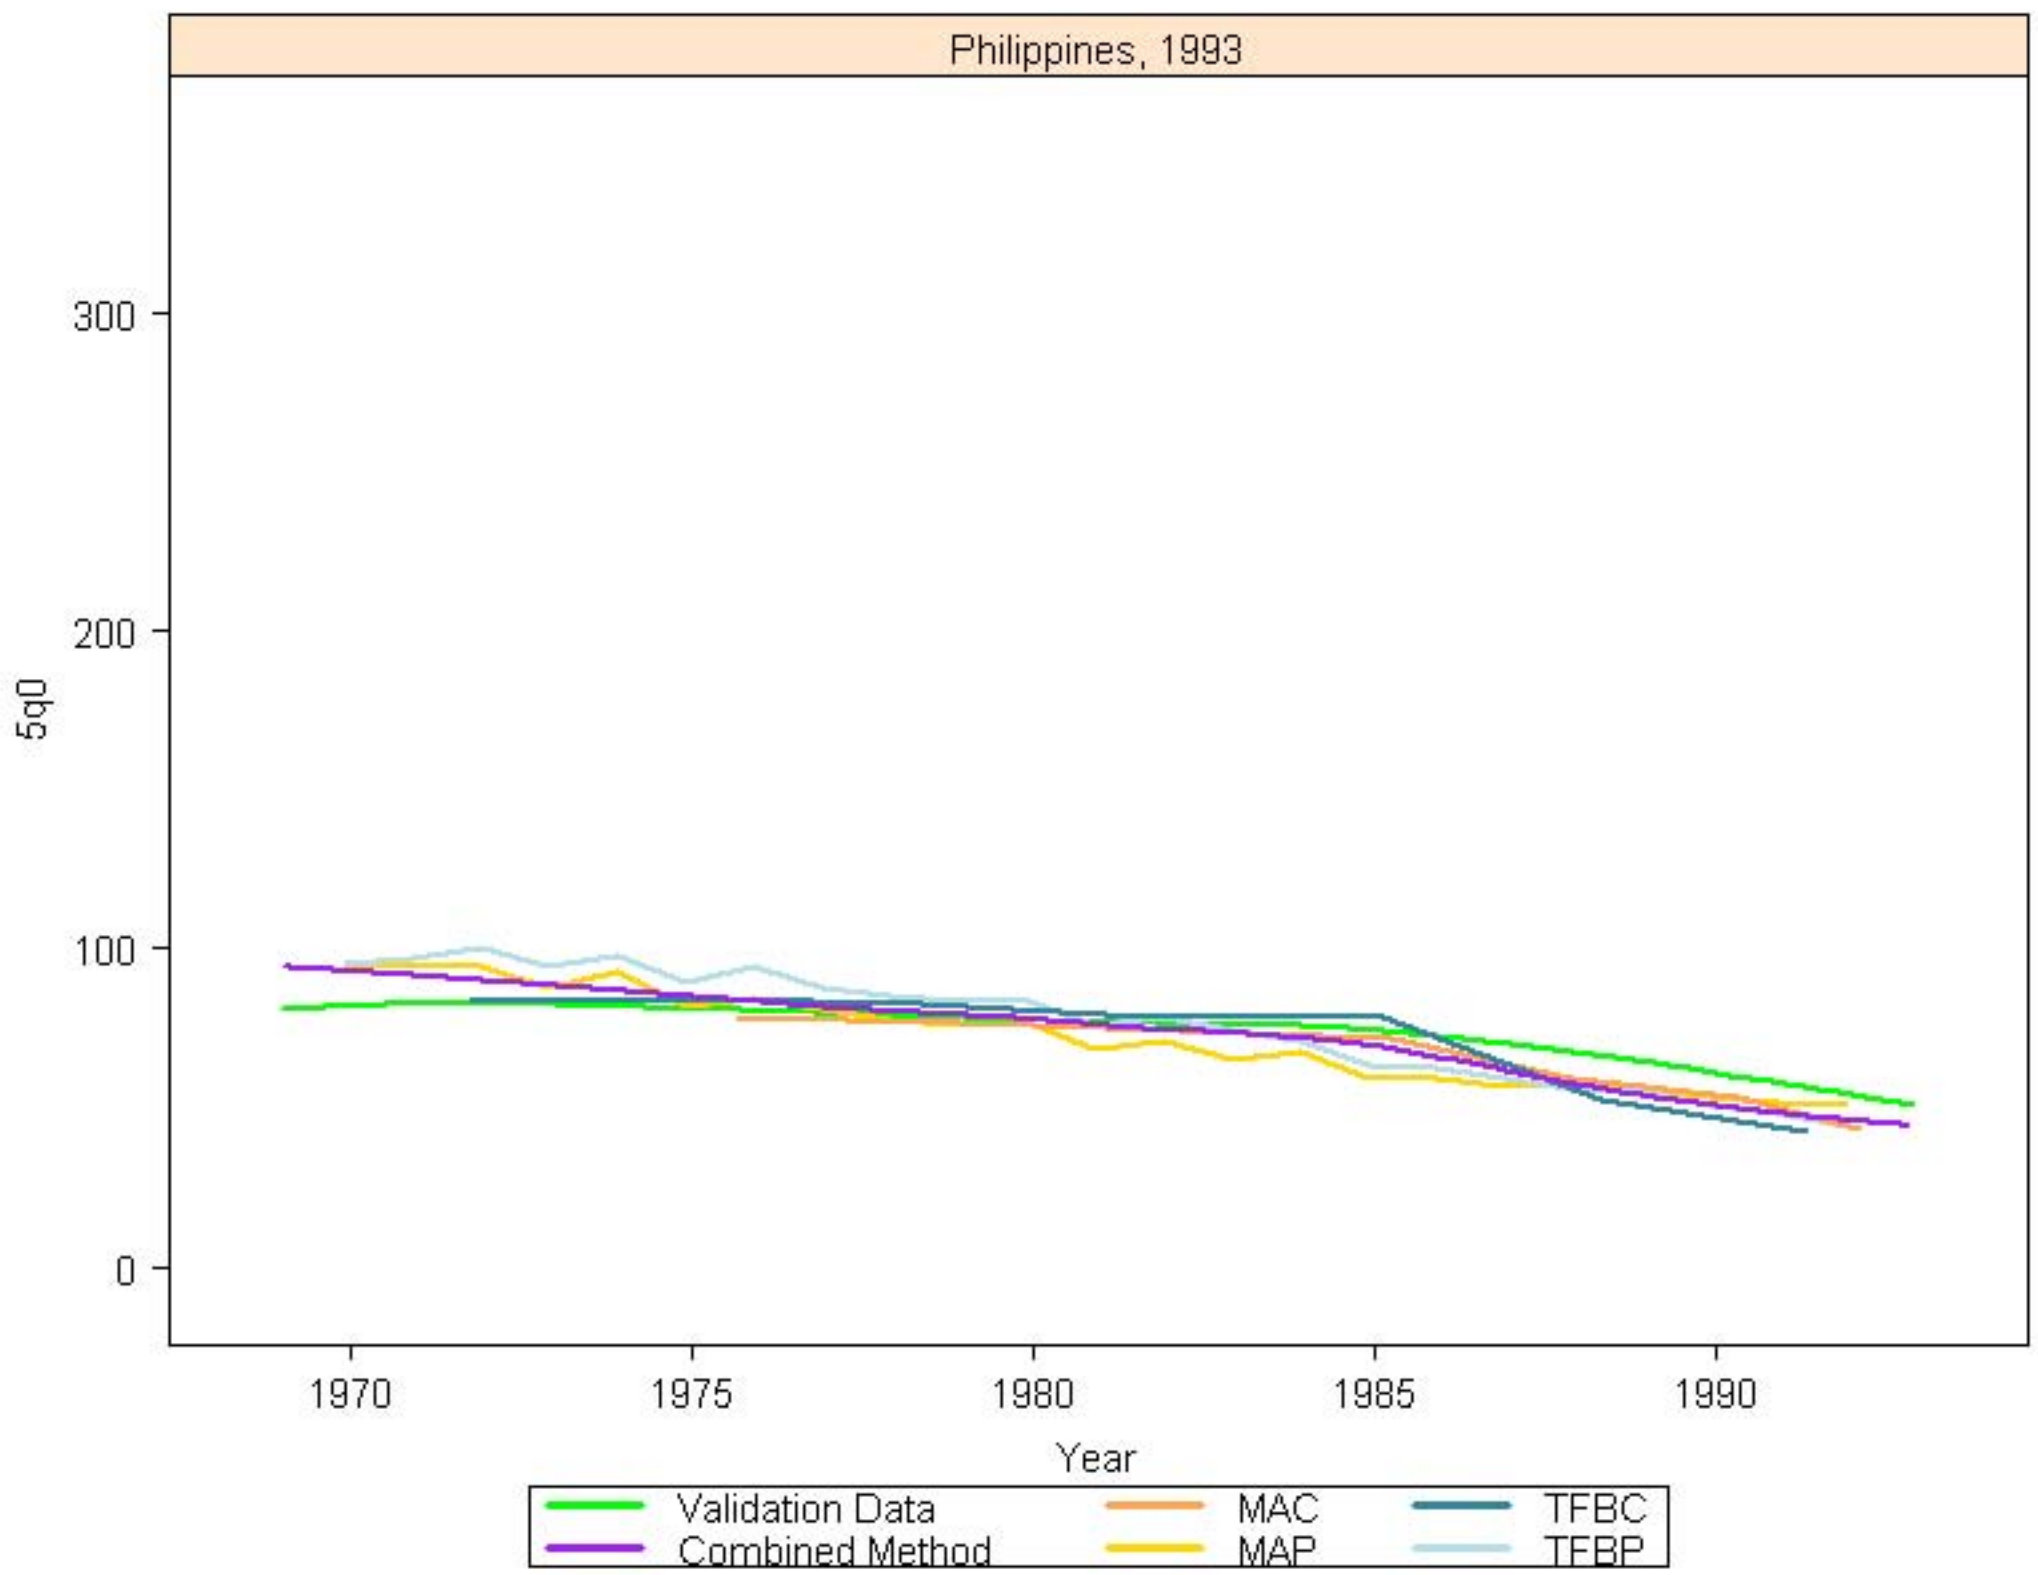

Philippines, 1998

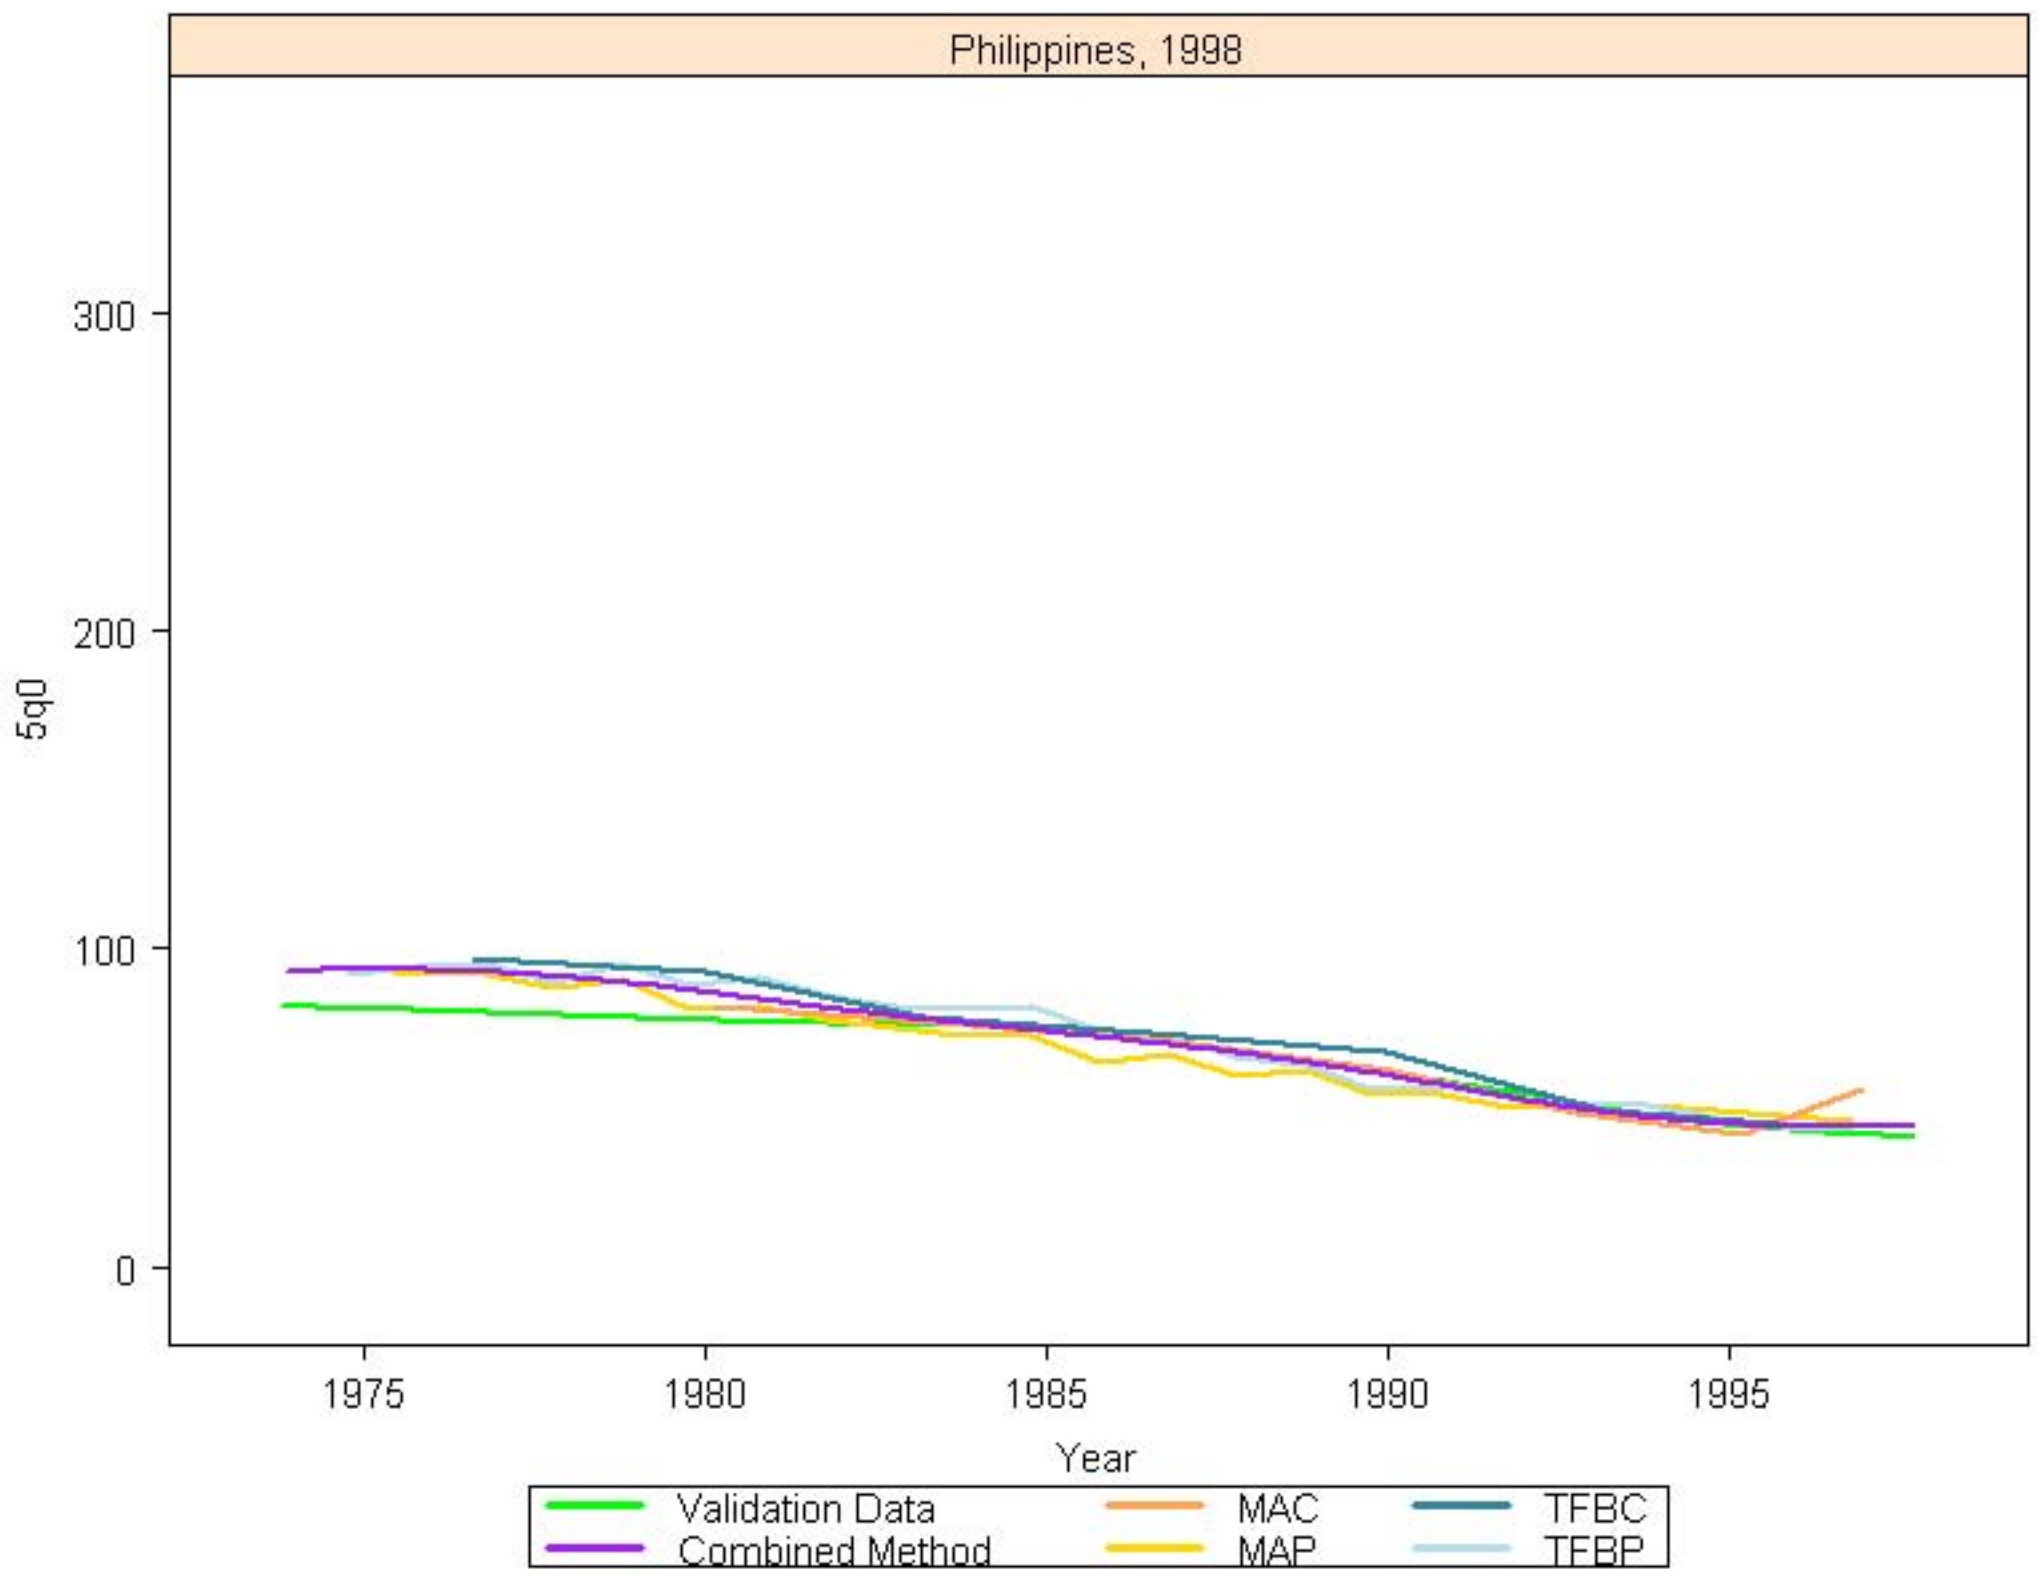

Philippines, 2004

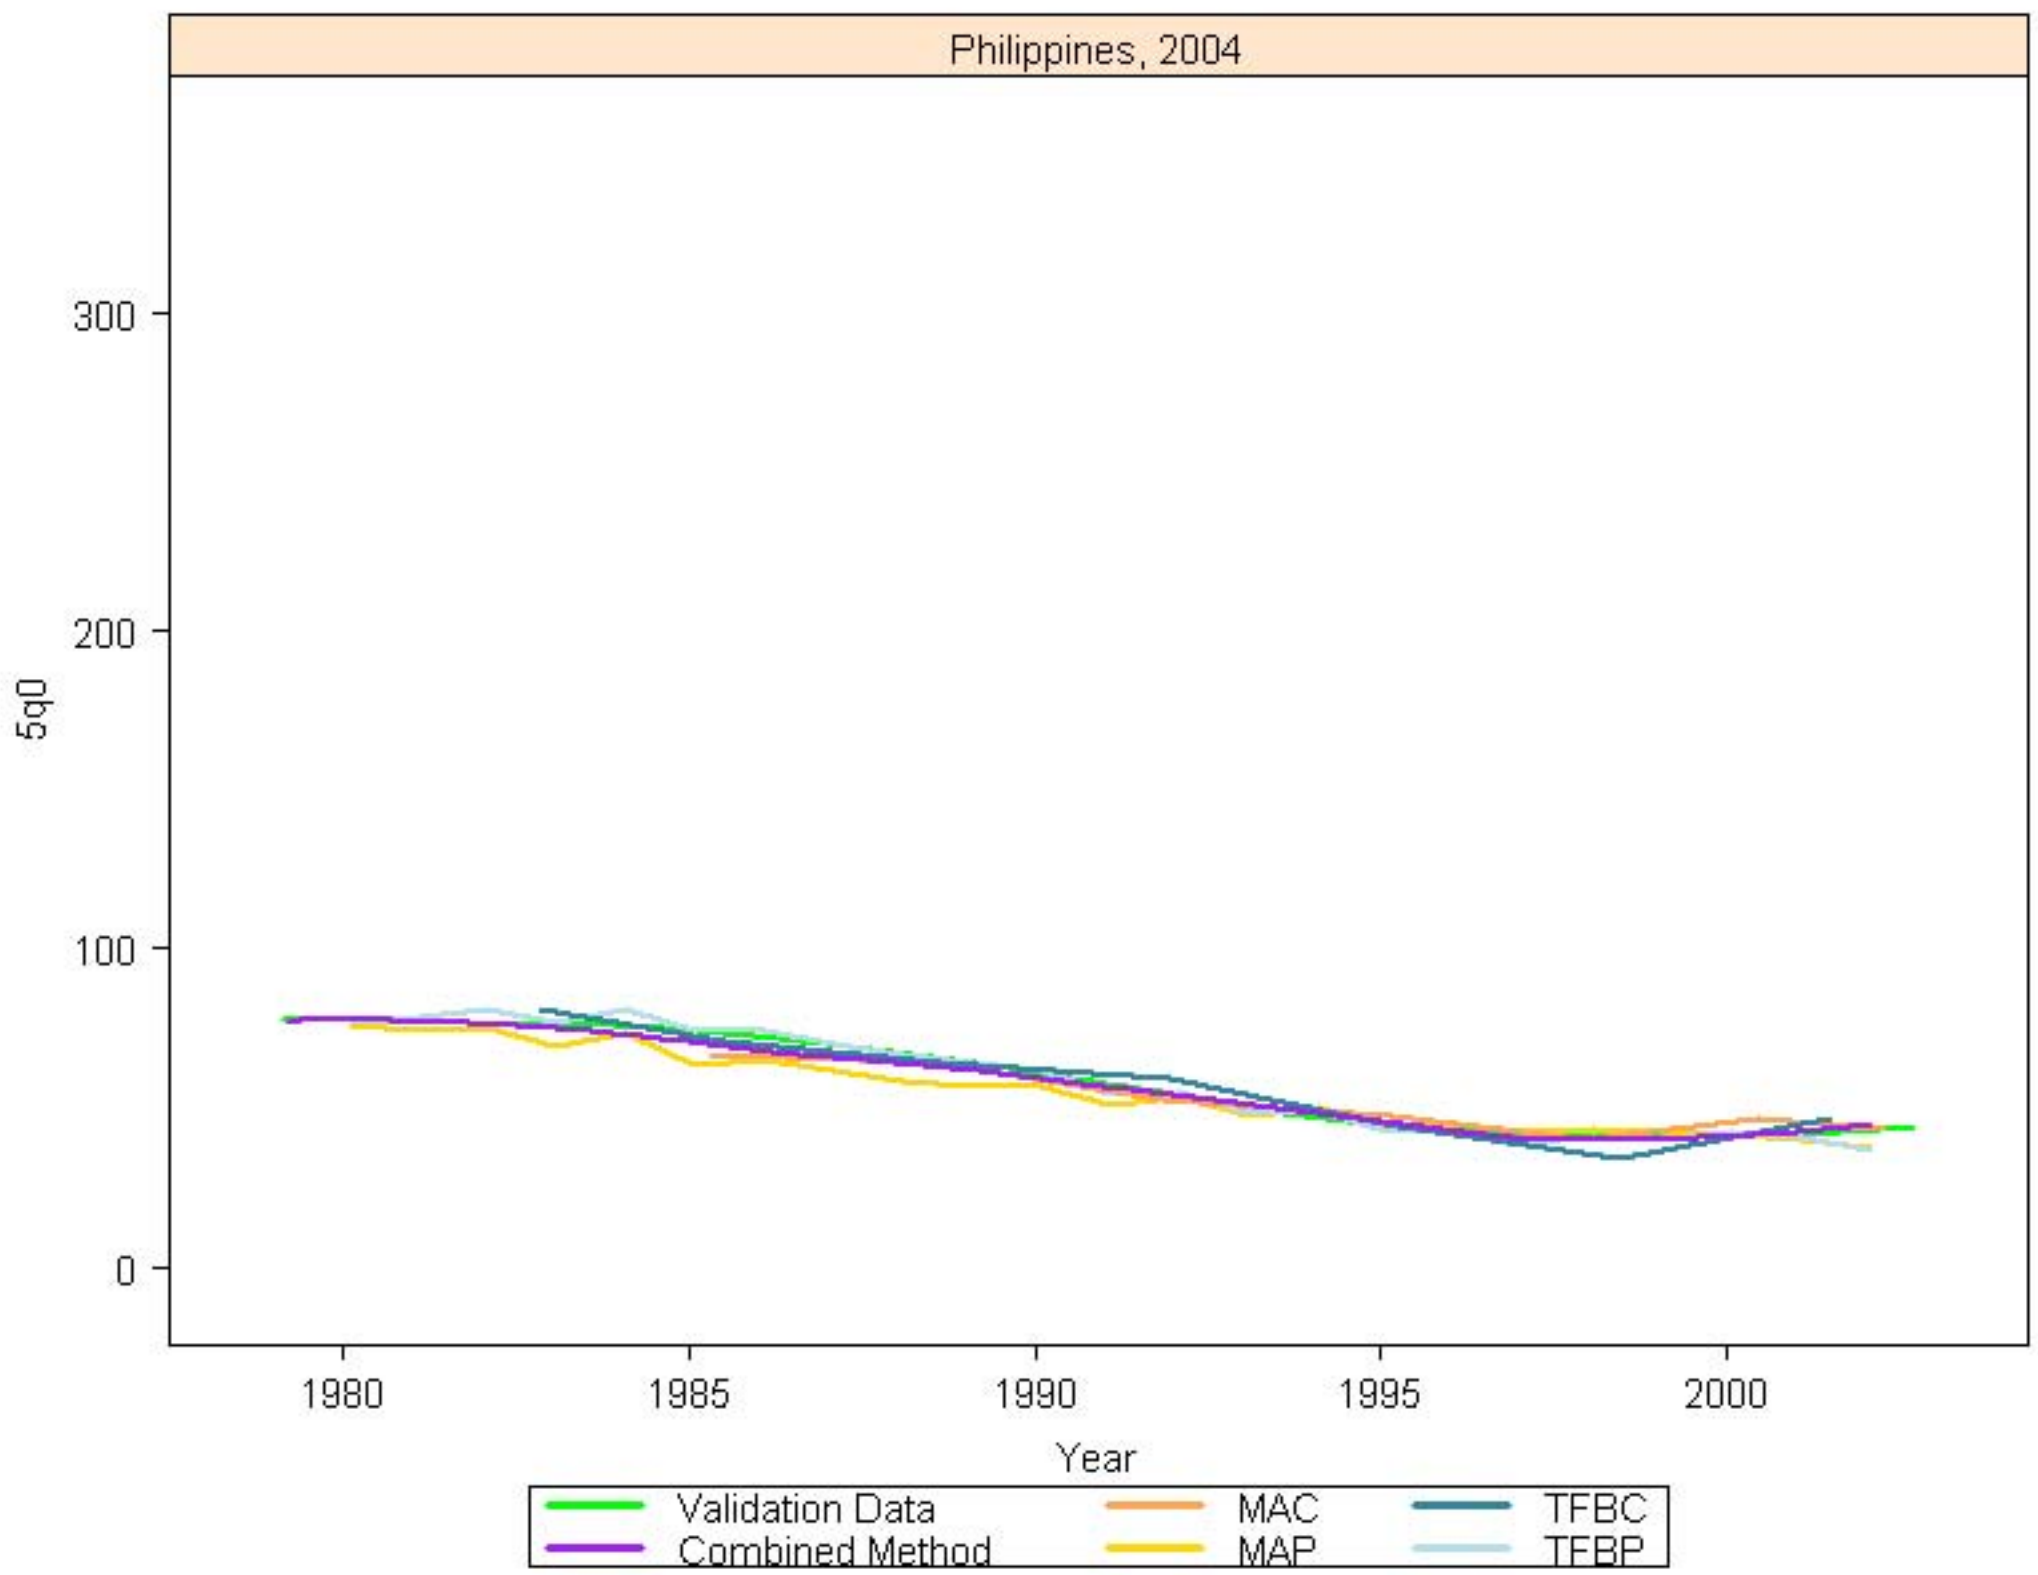



Rwanda, 1993

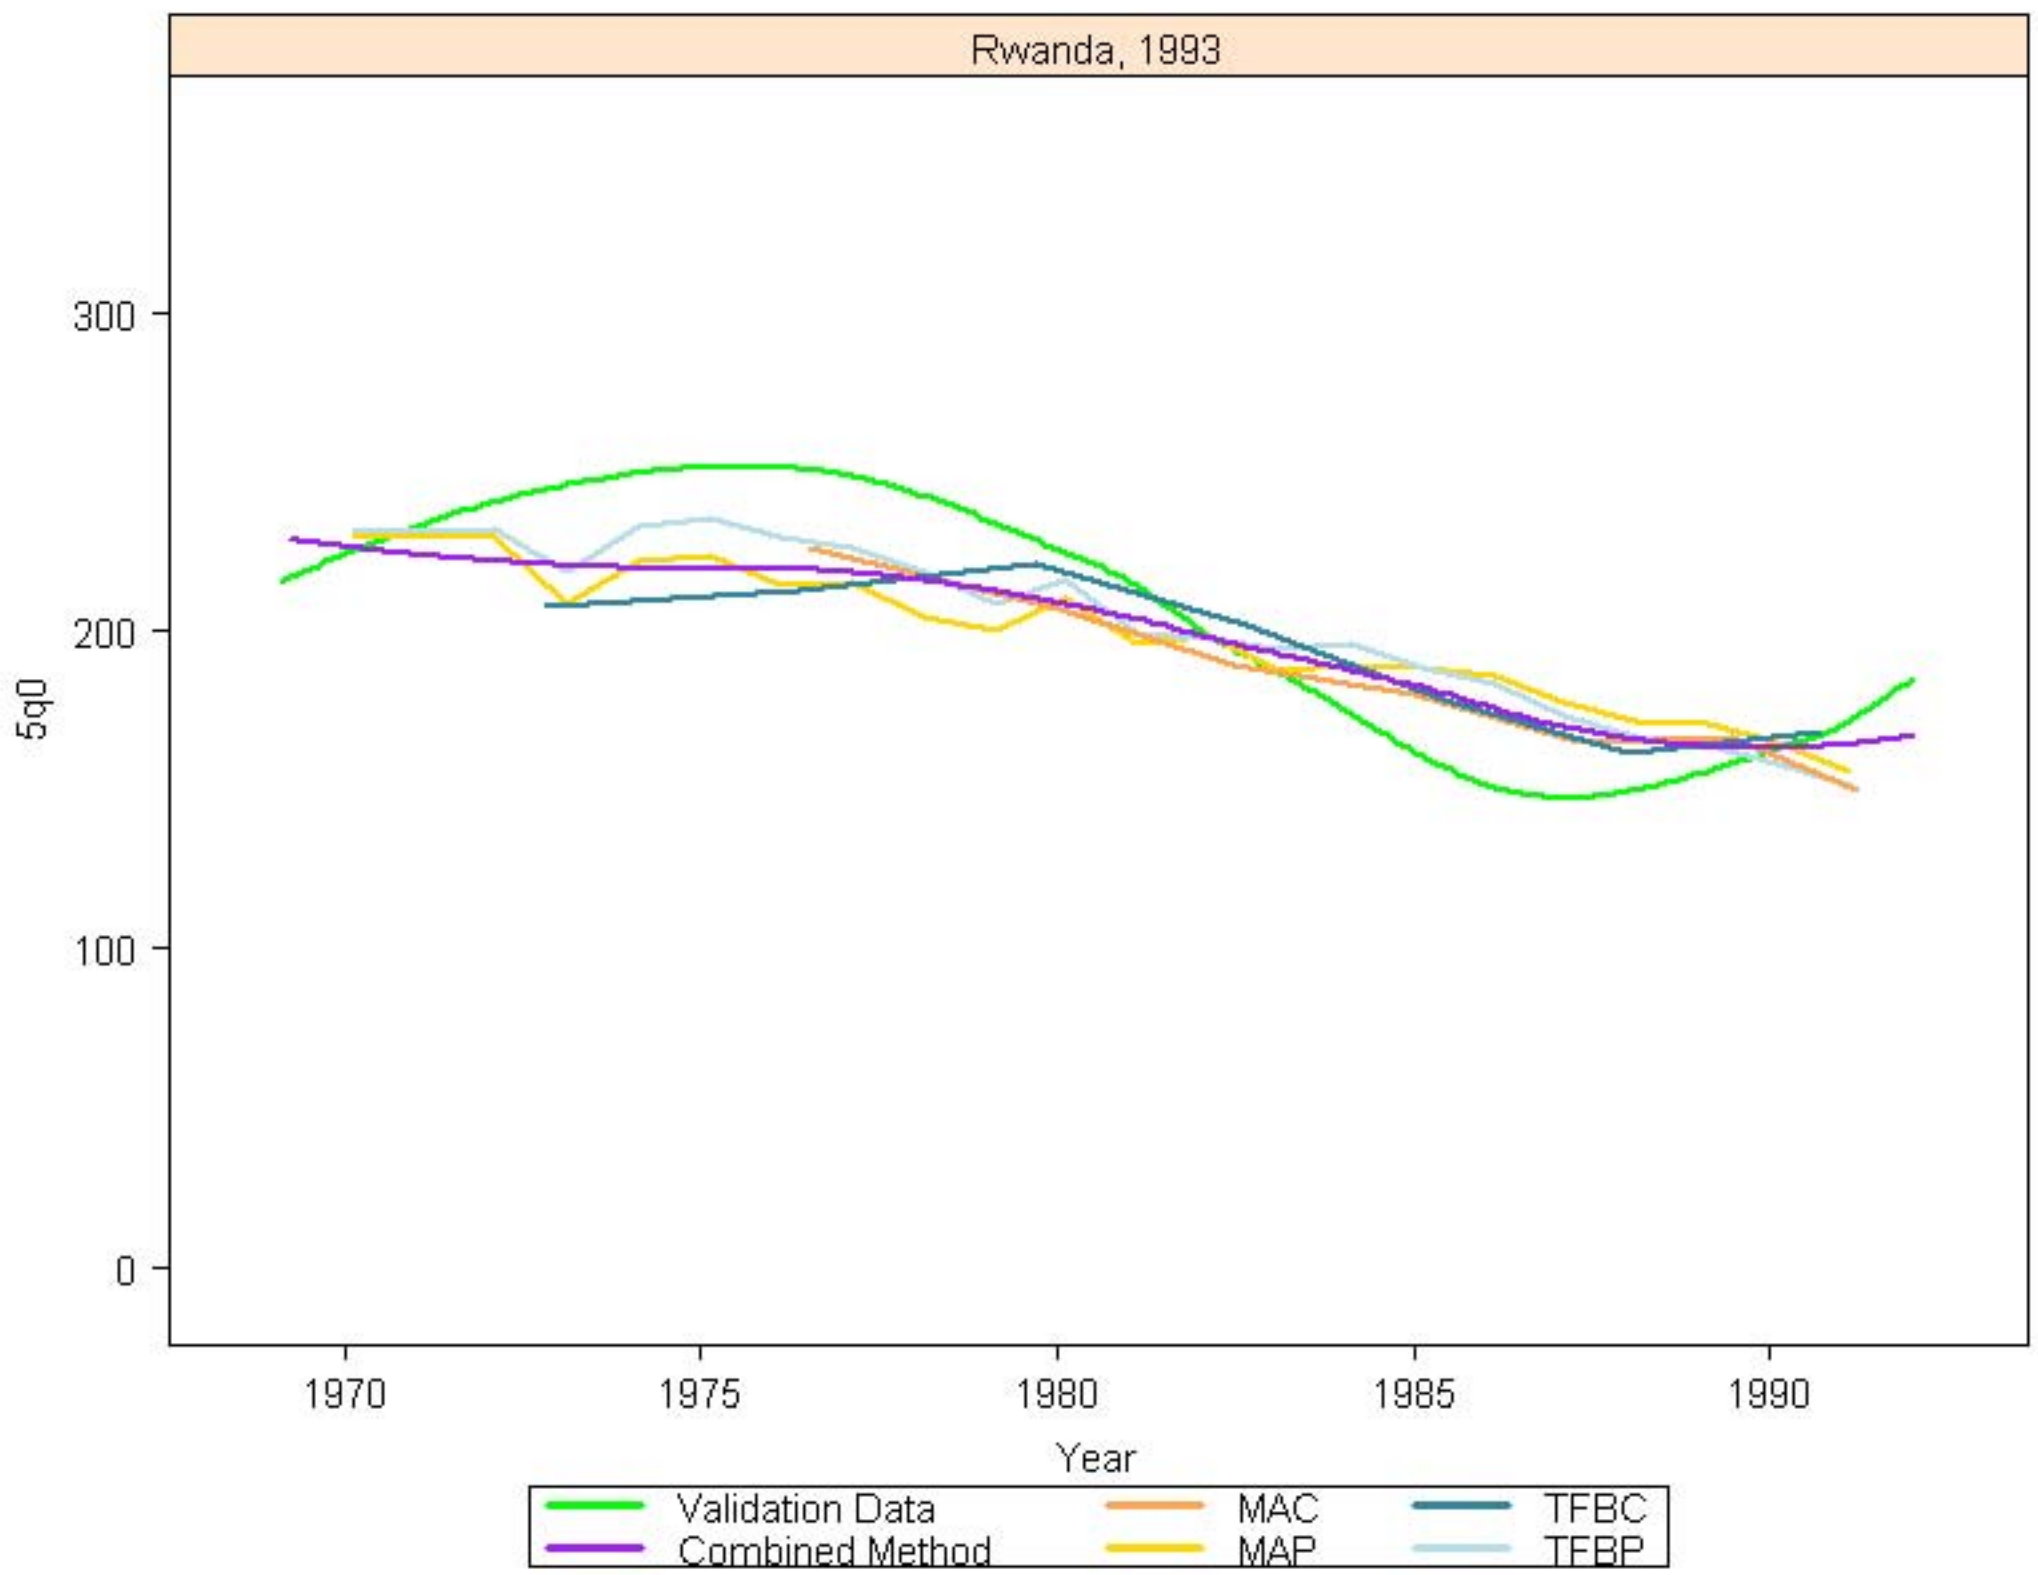

Rwanda, 2001

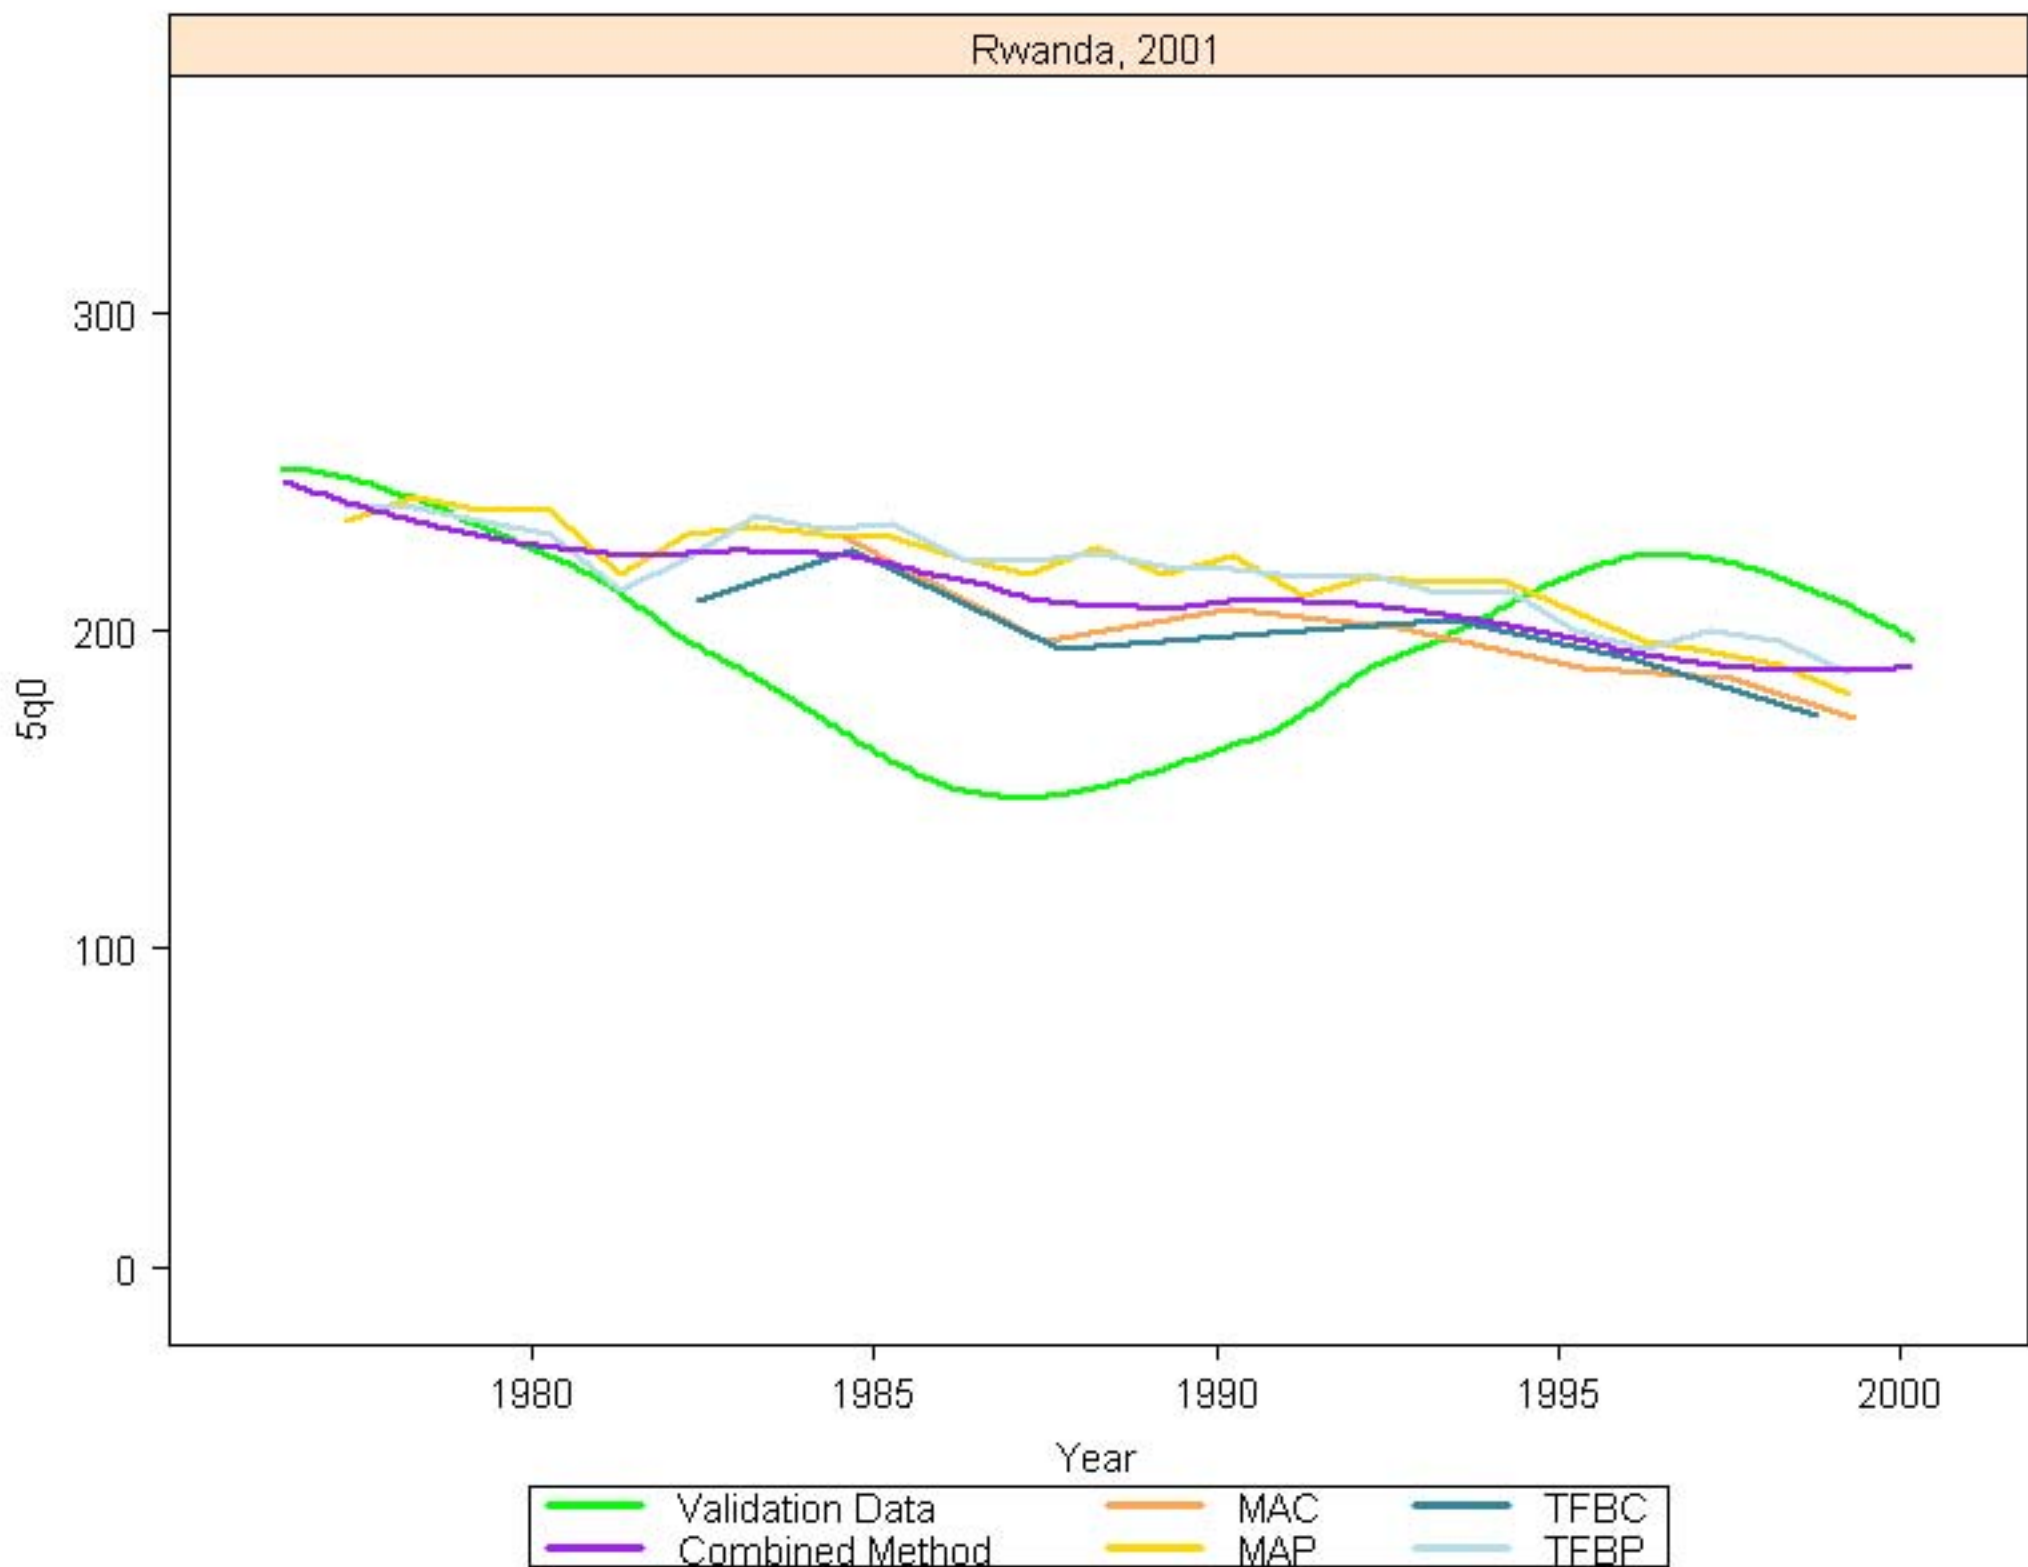

Rwanda, 2005

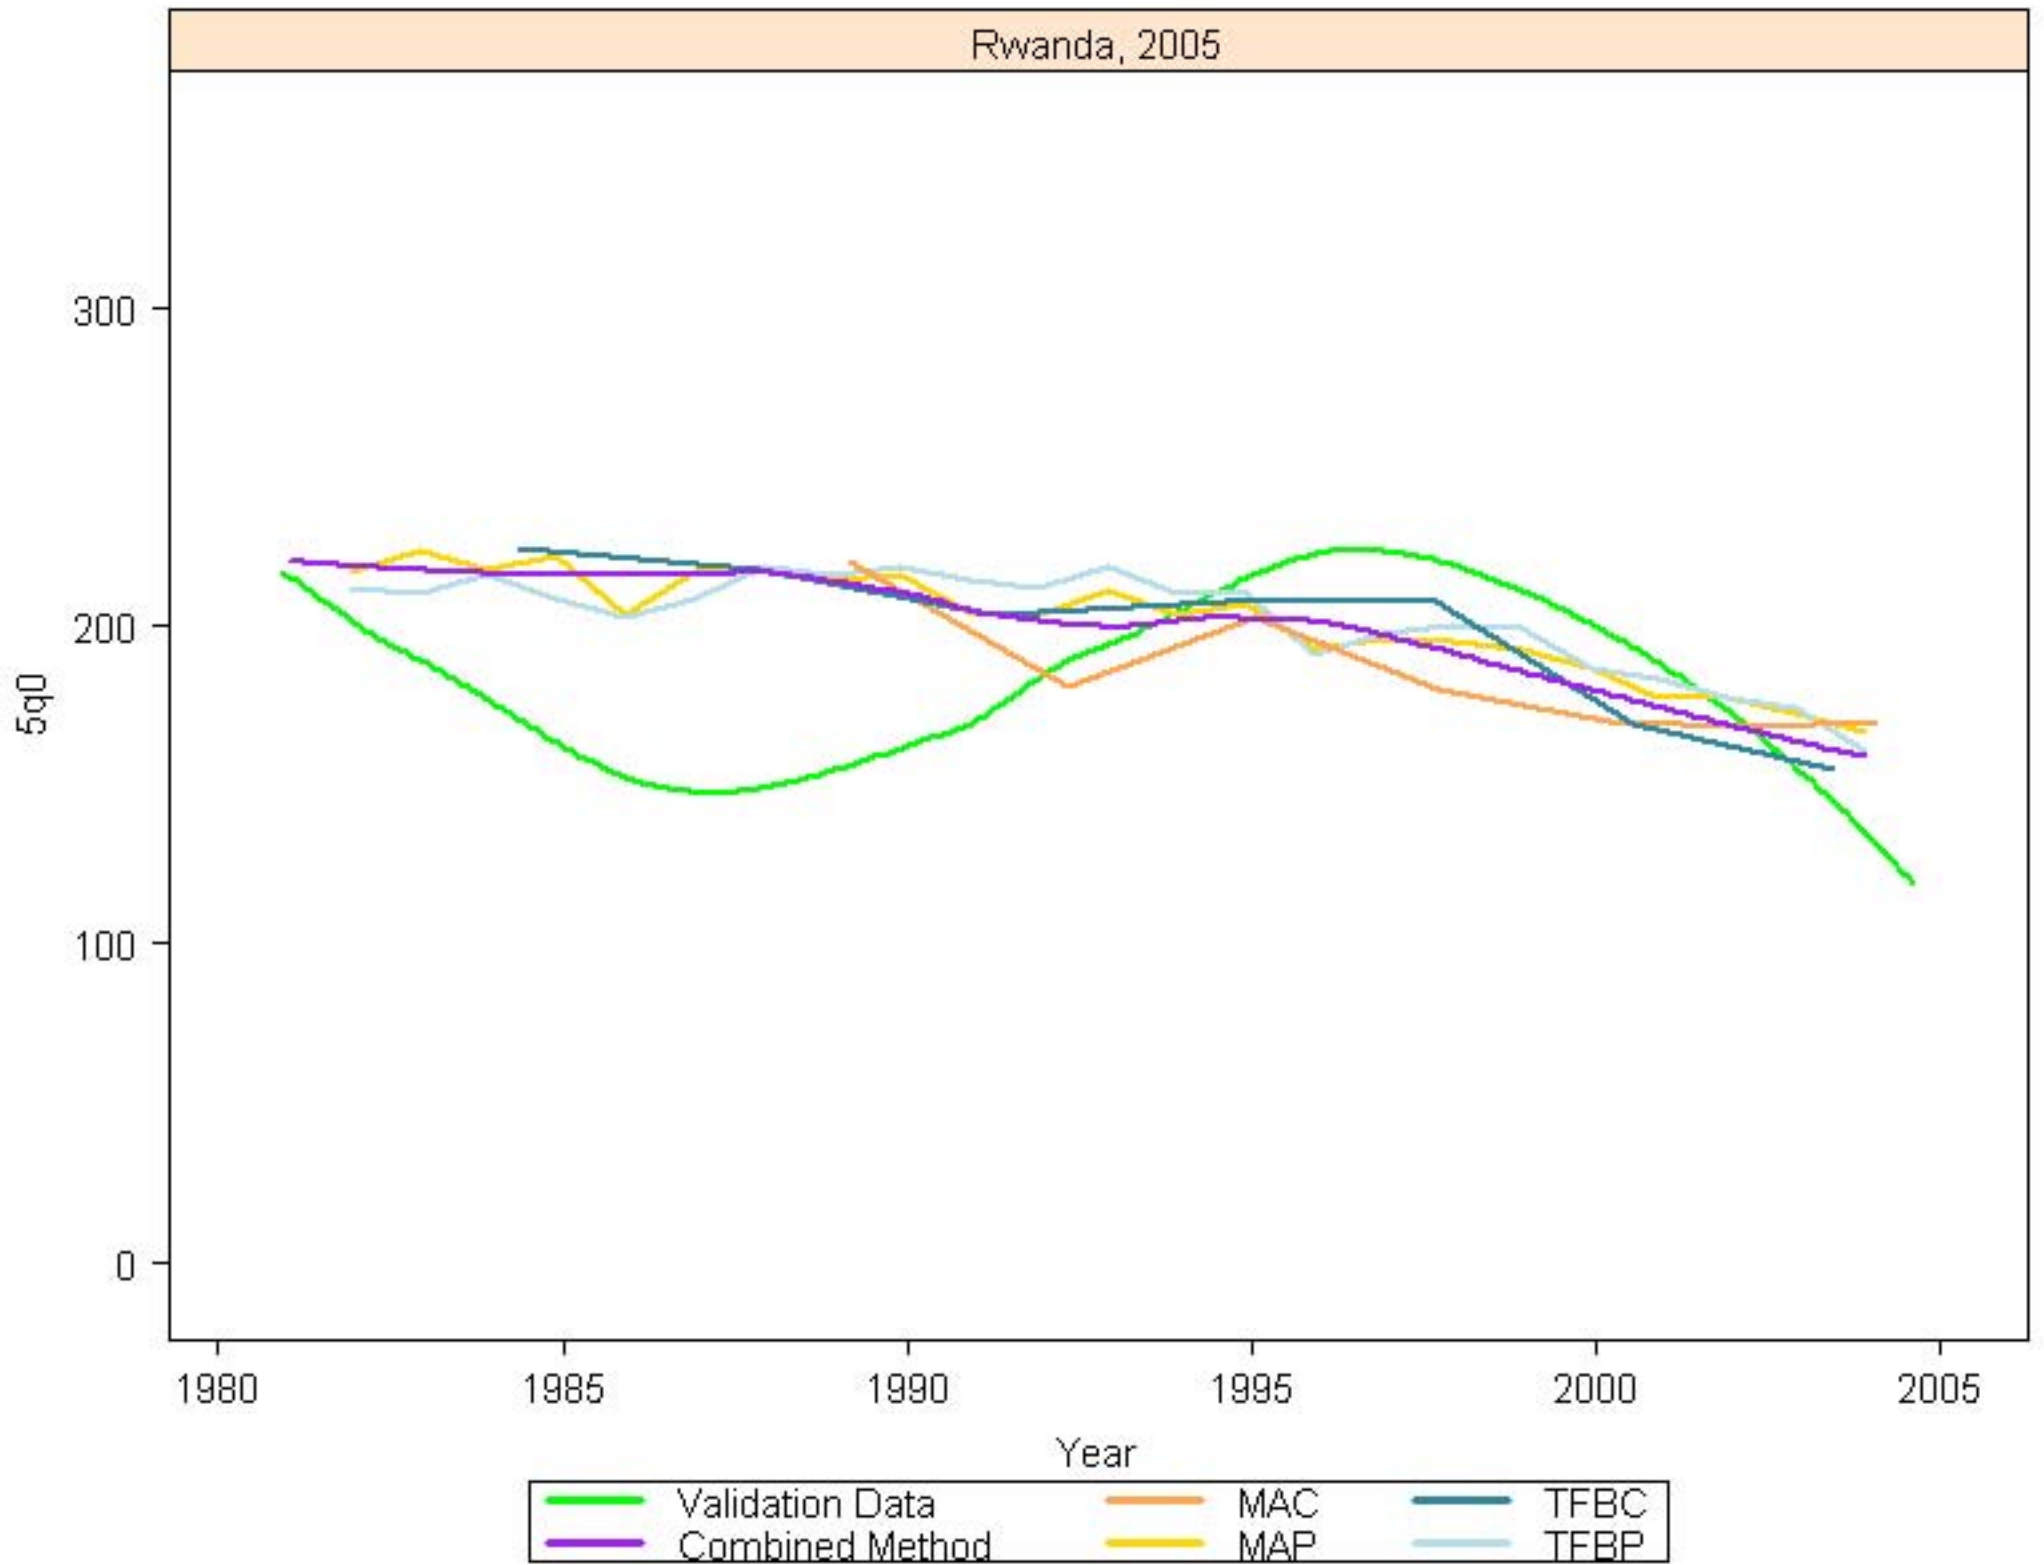

Senegal, 1986

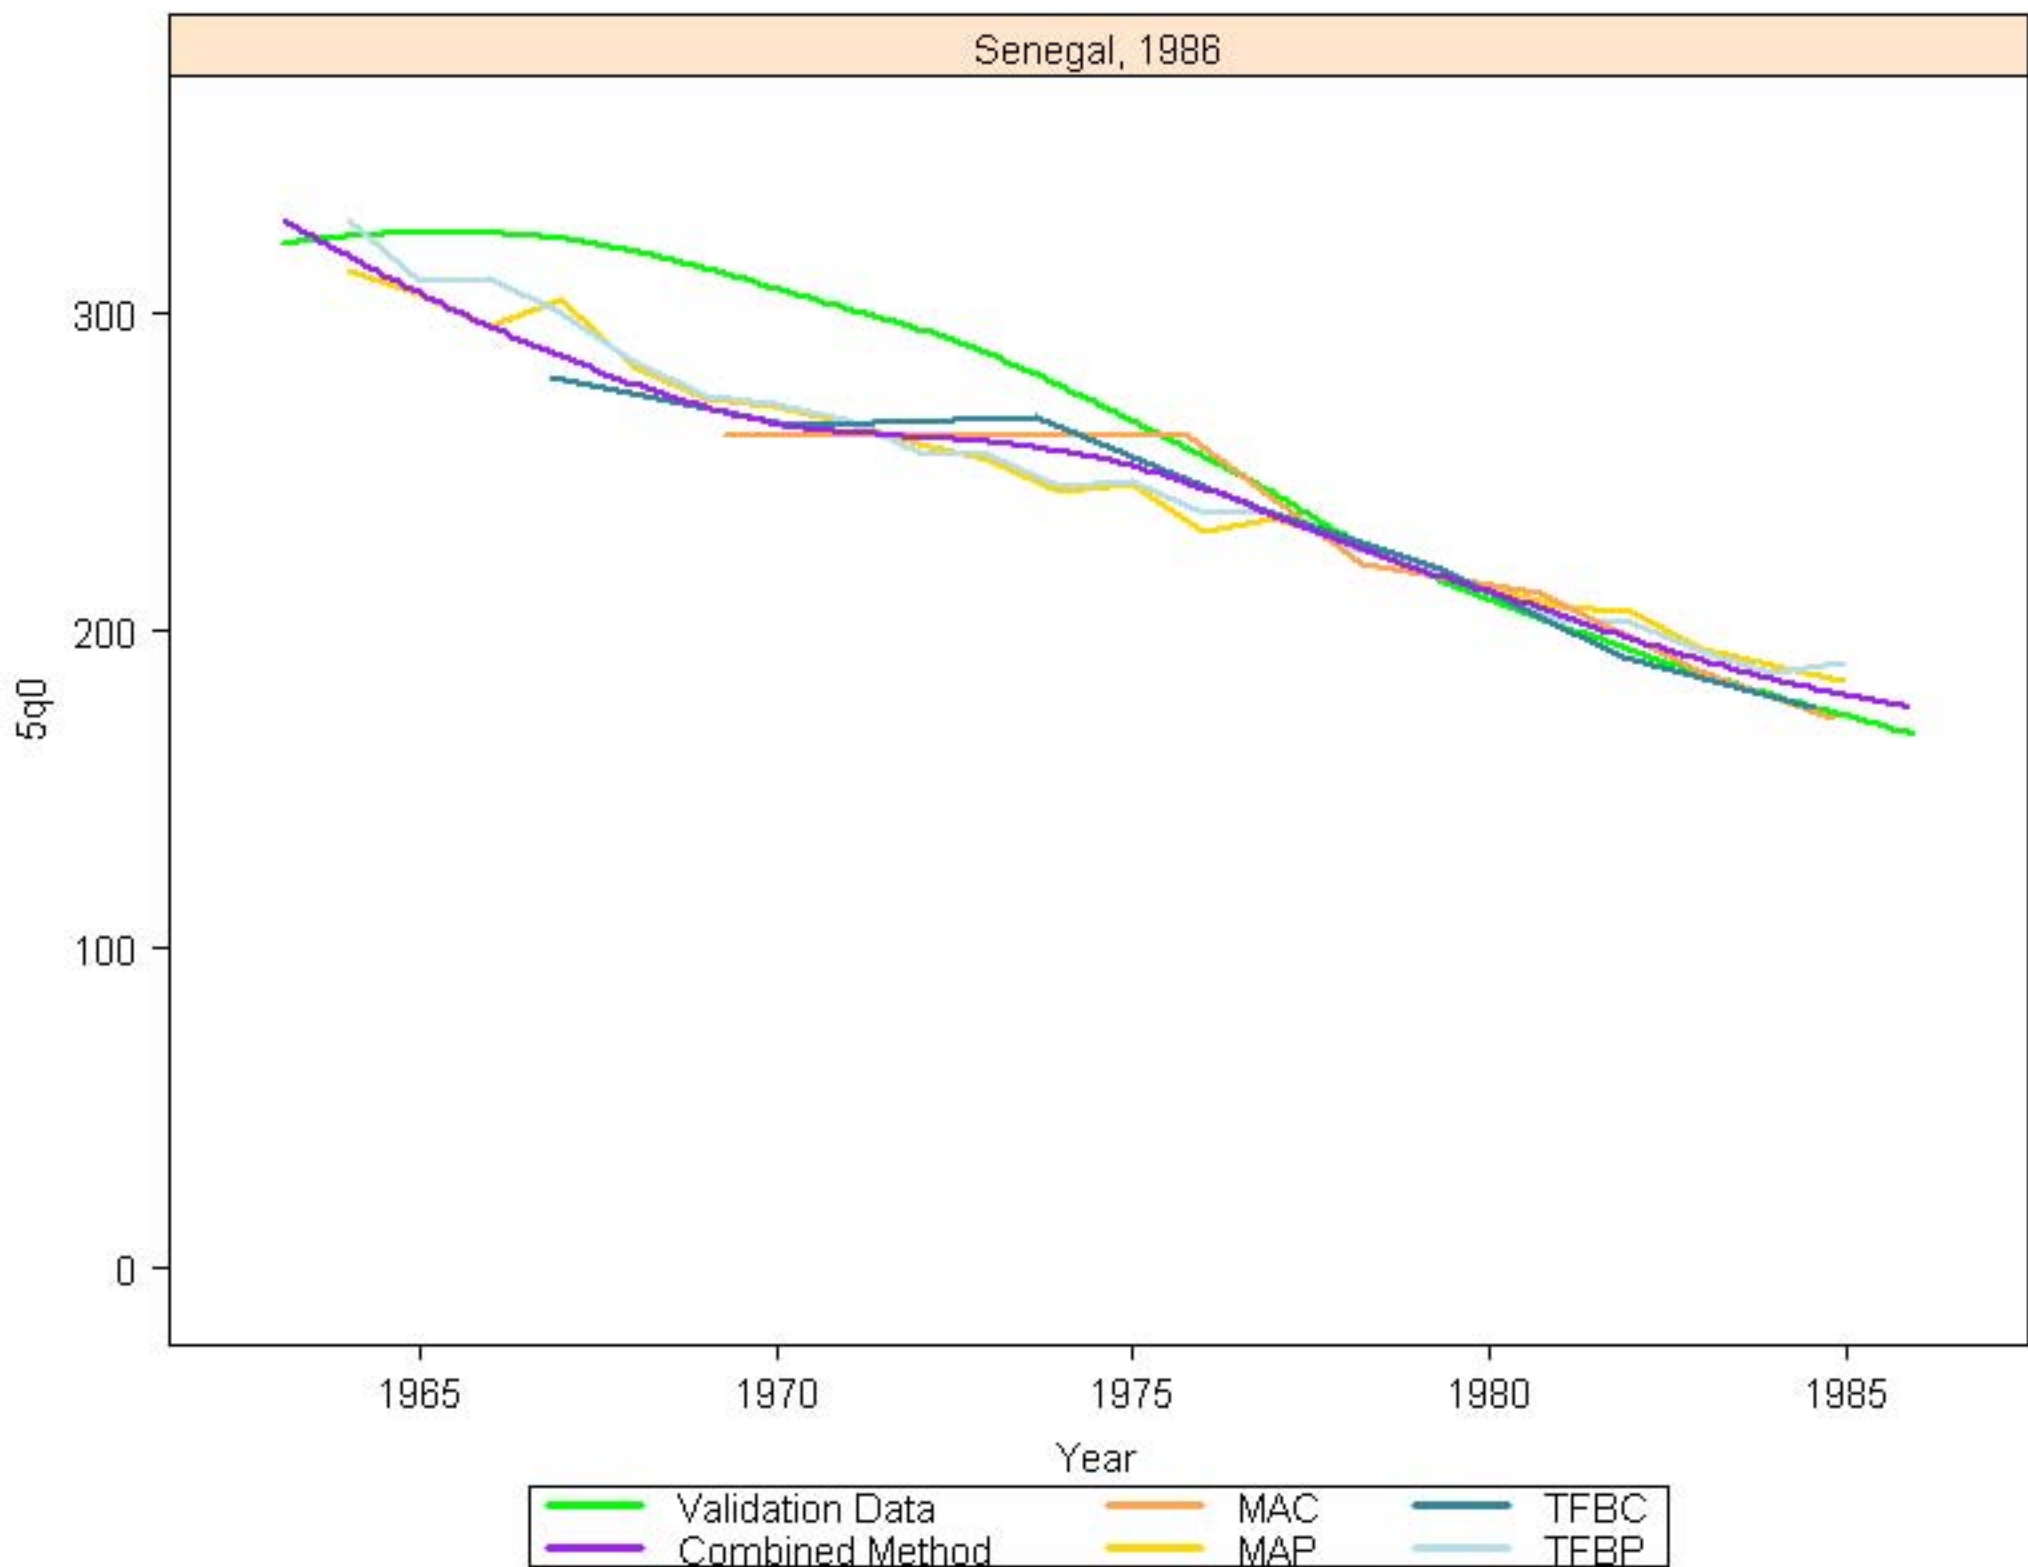

Senegal, 1993

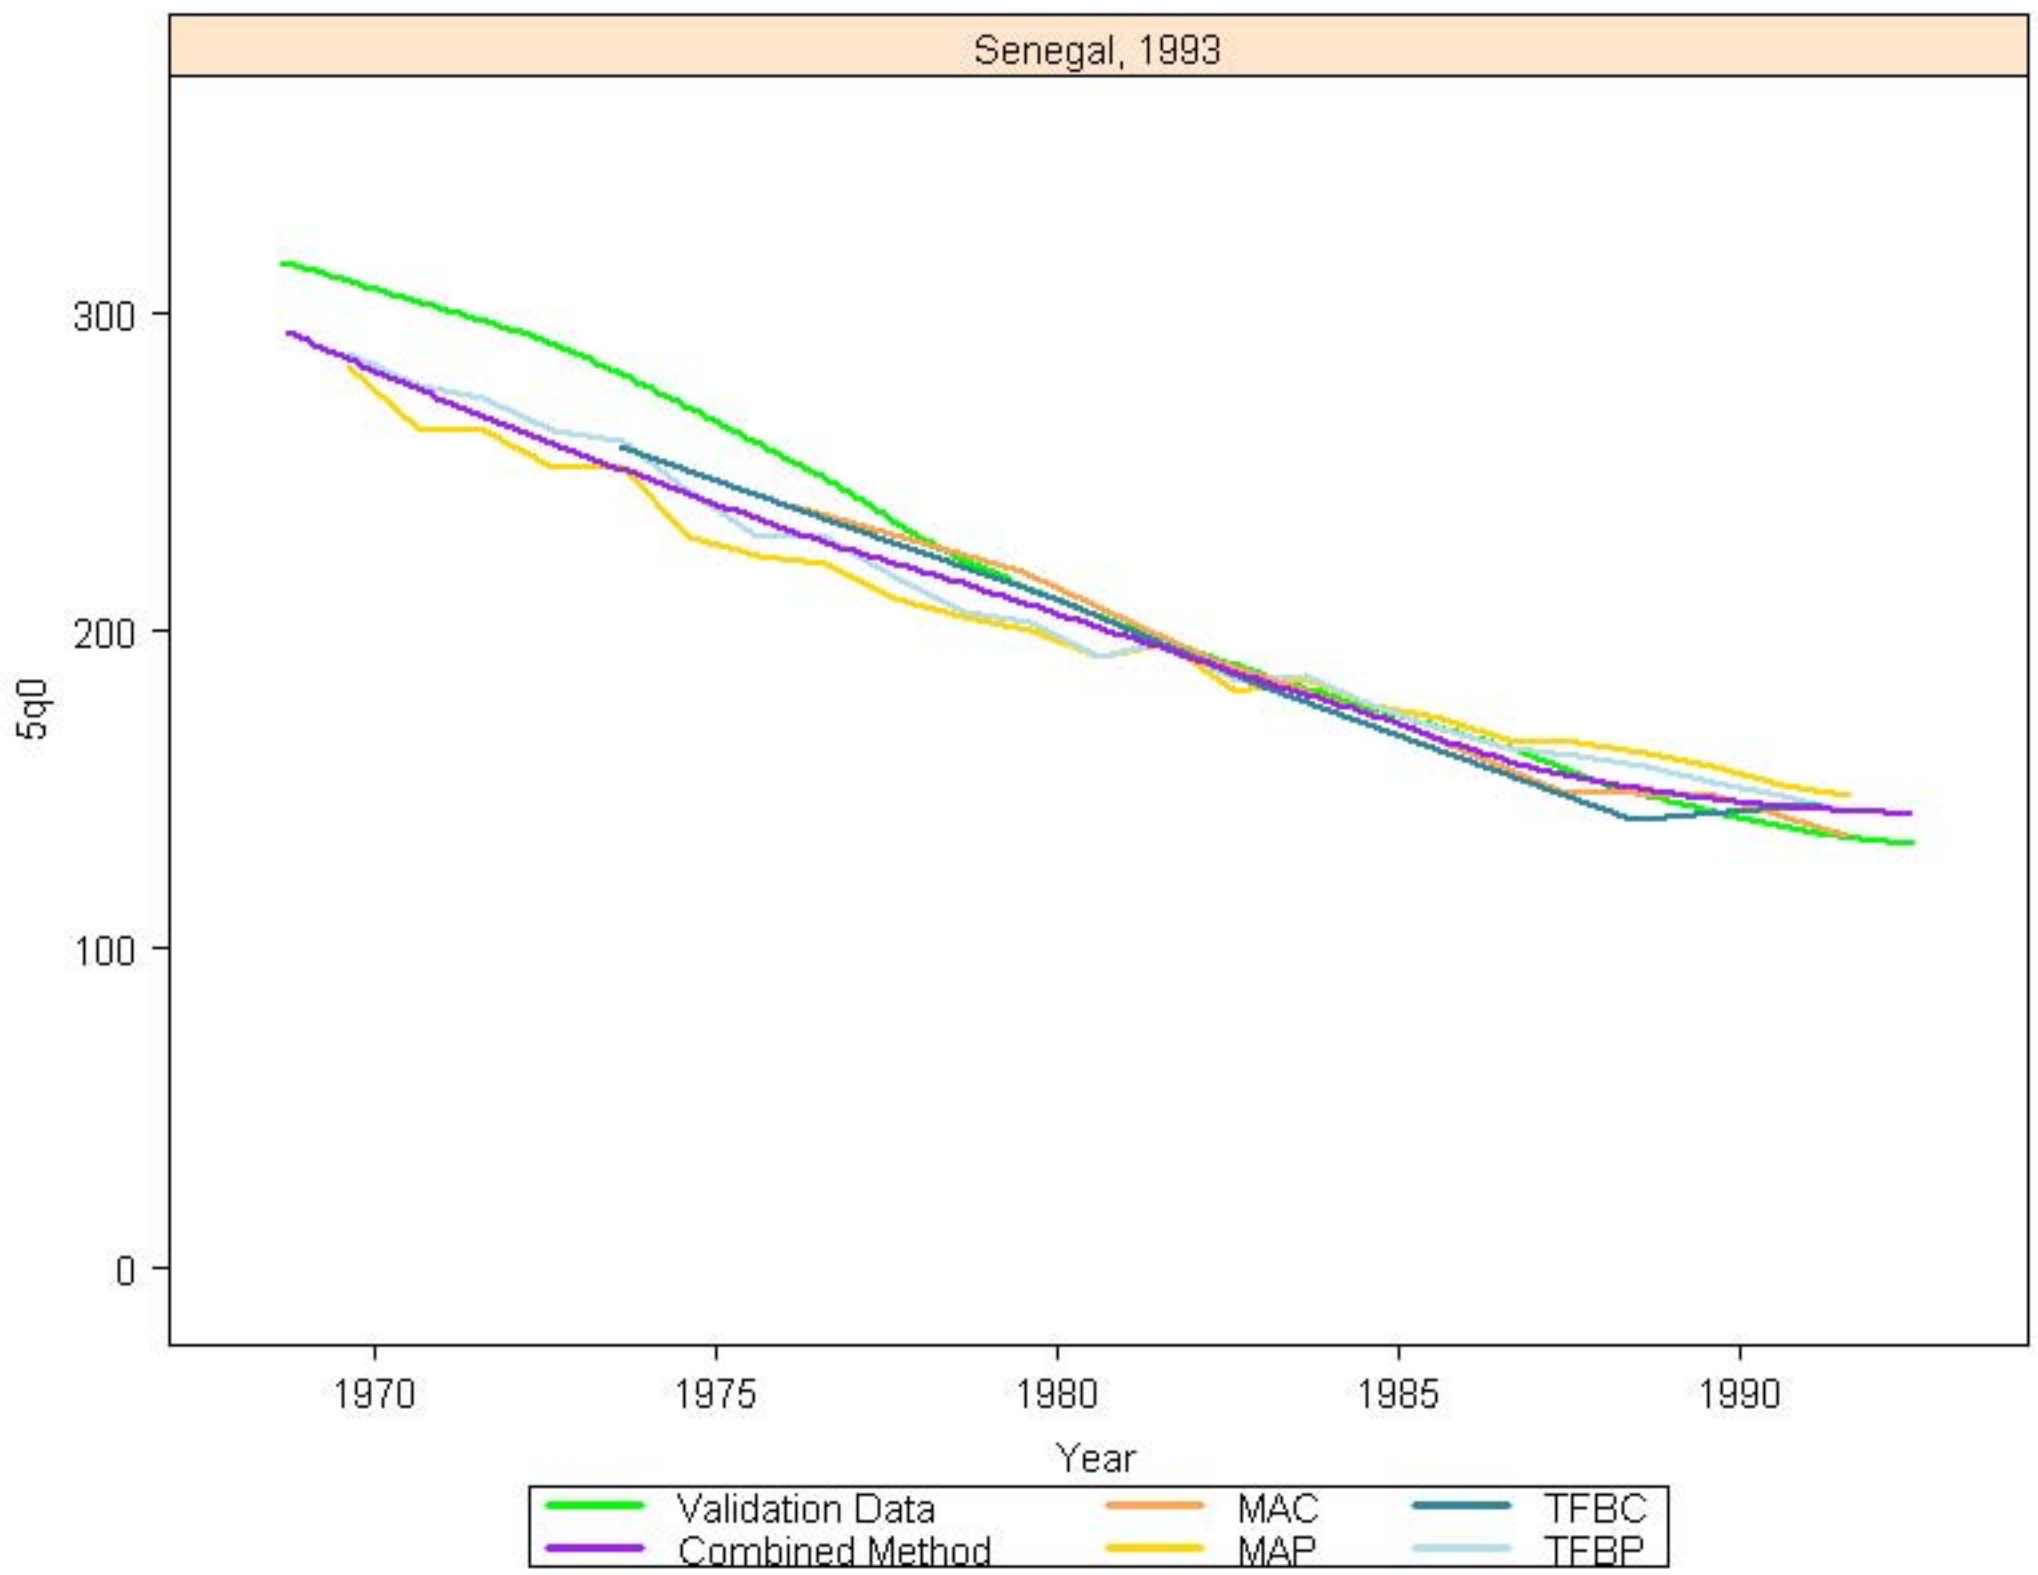

Senegal, 1997

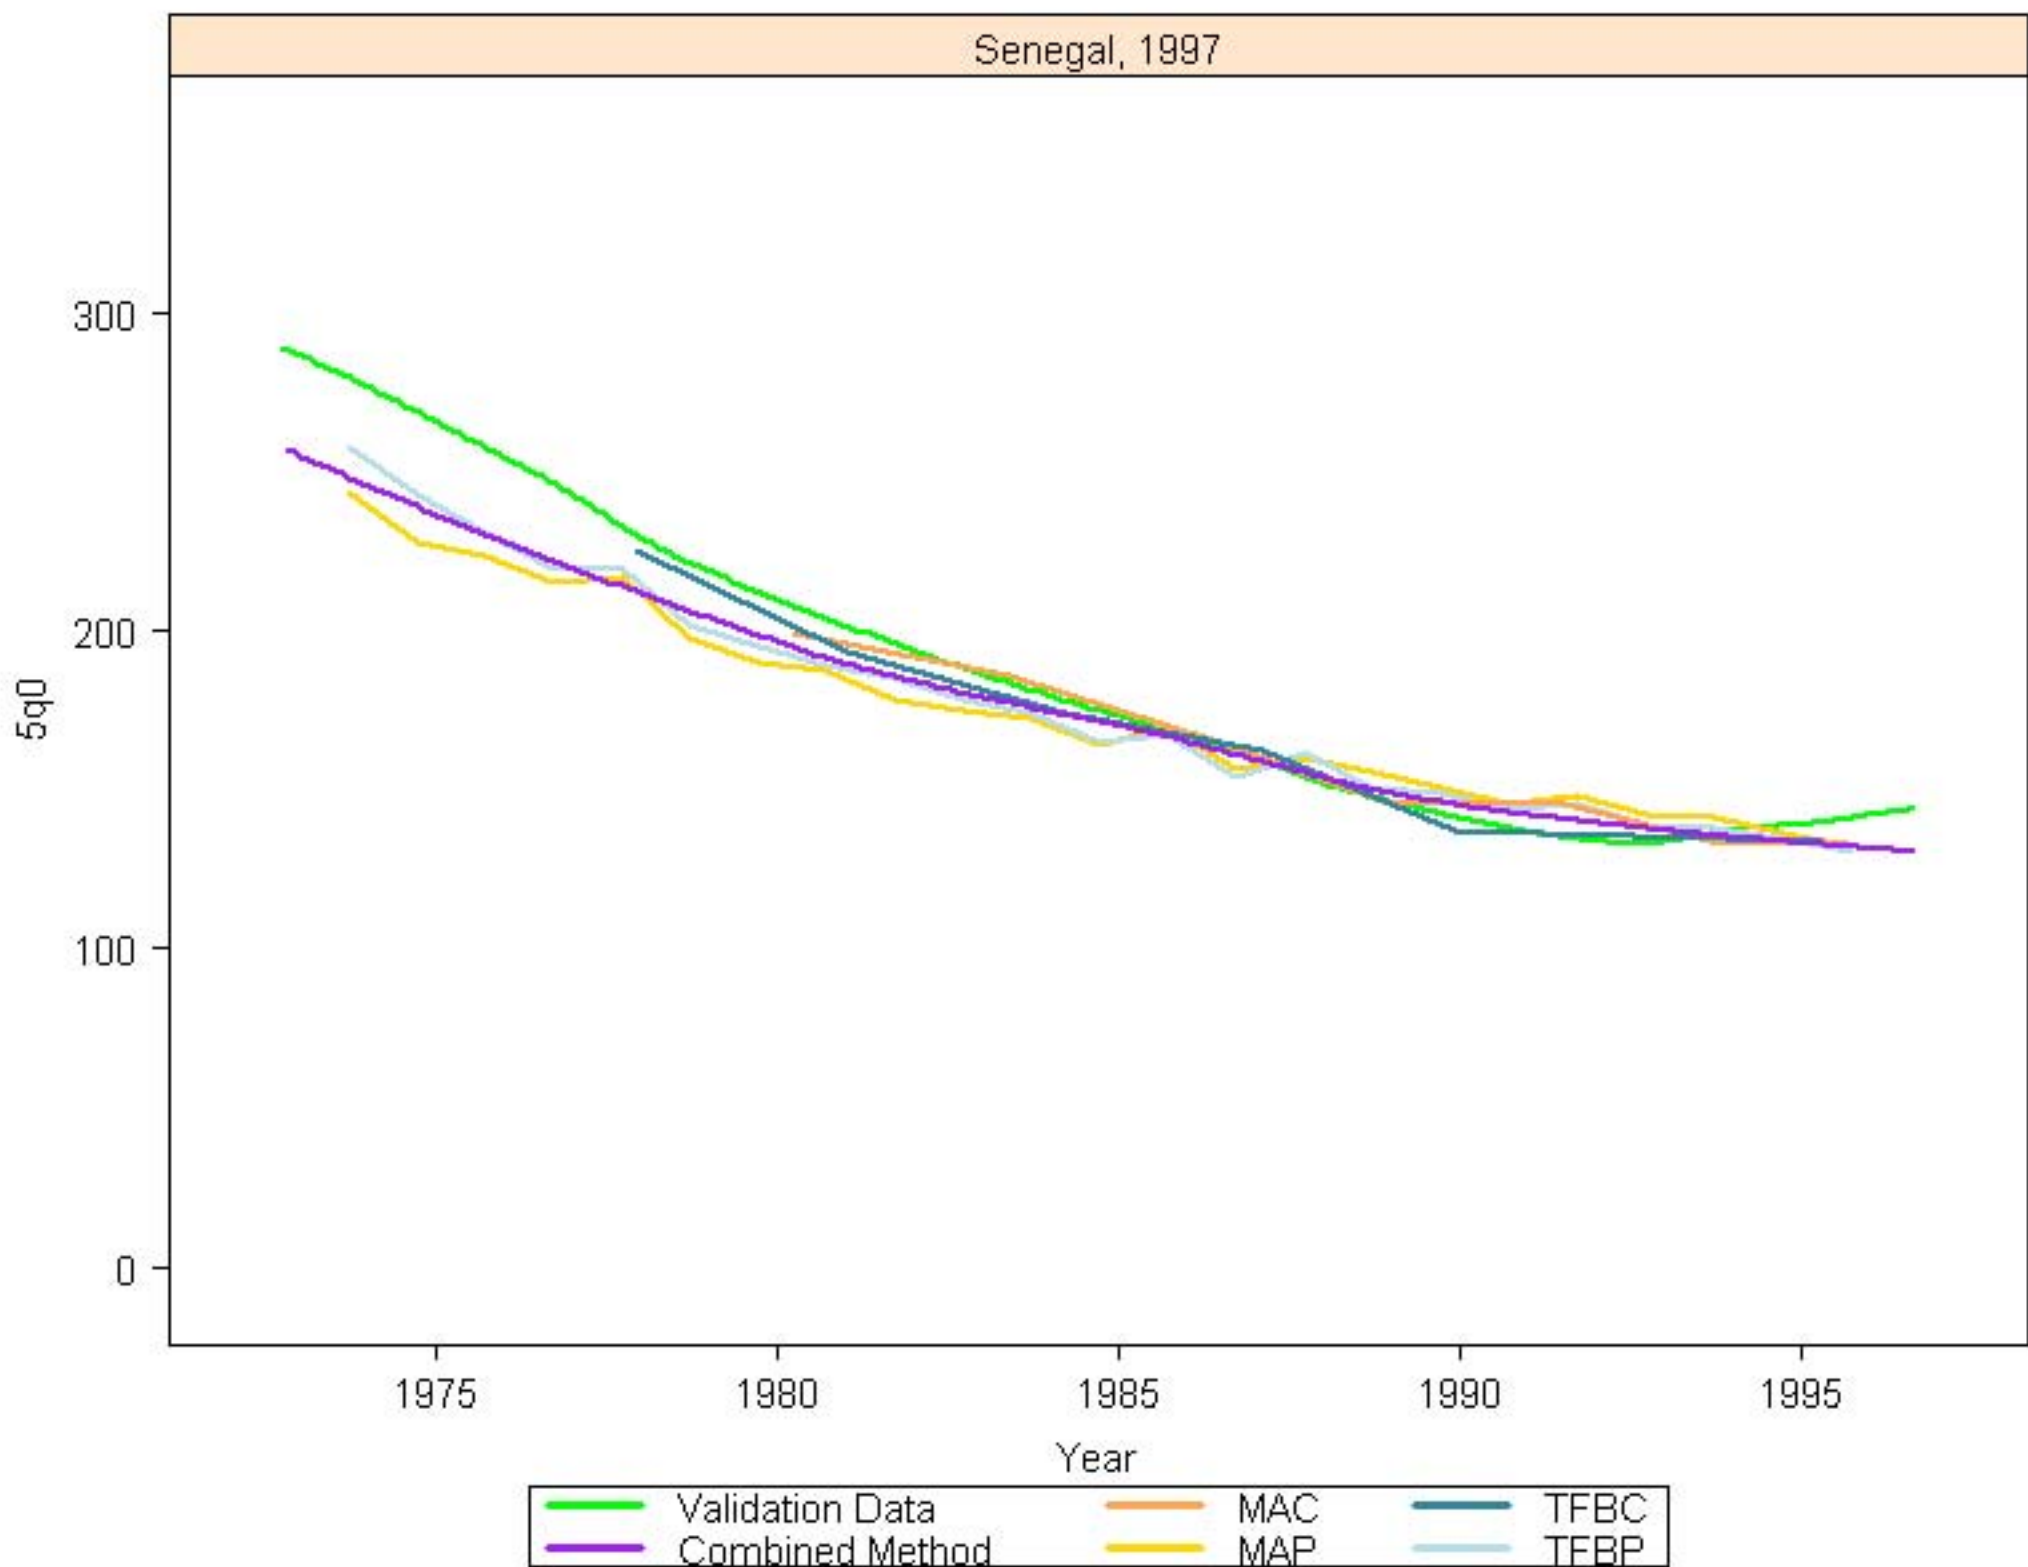

Senegal, 2005

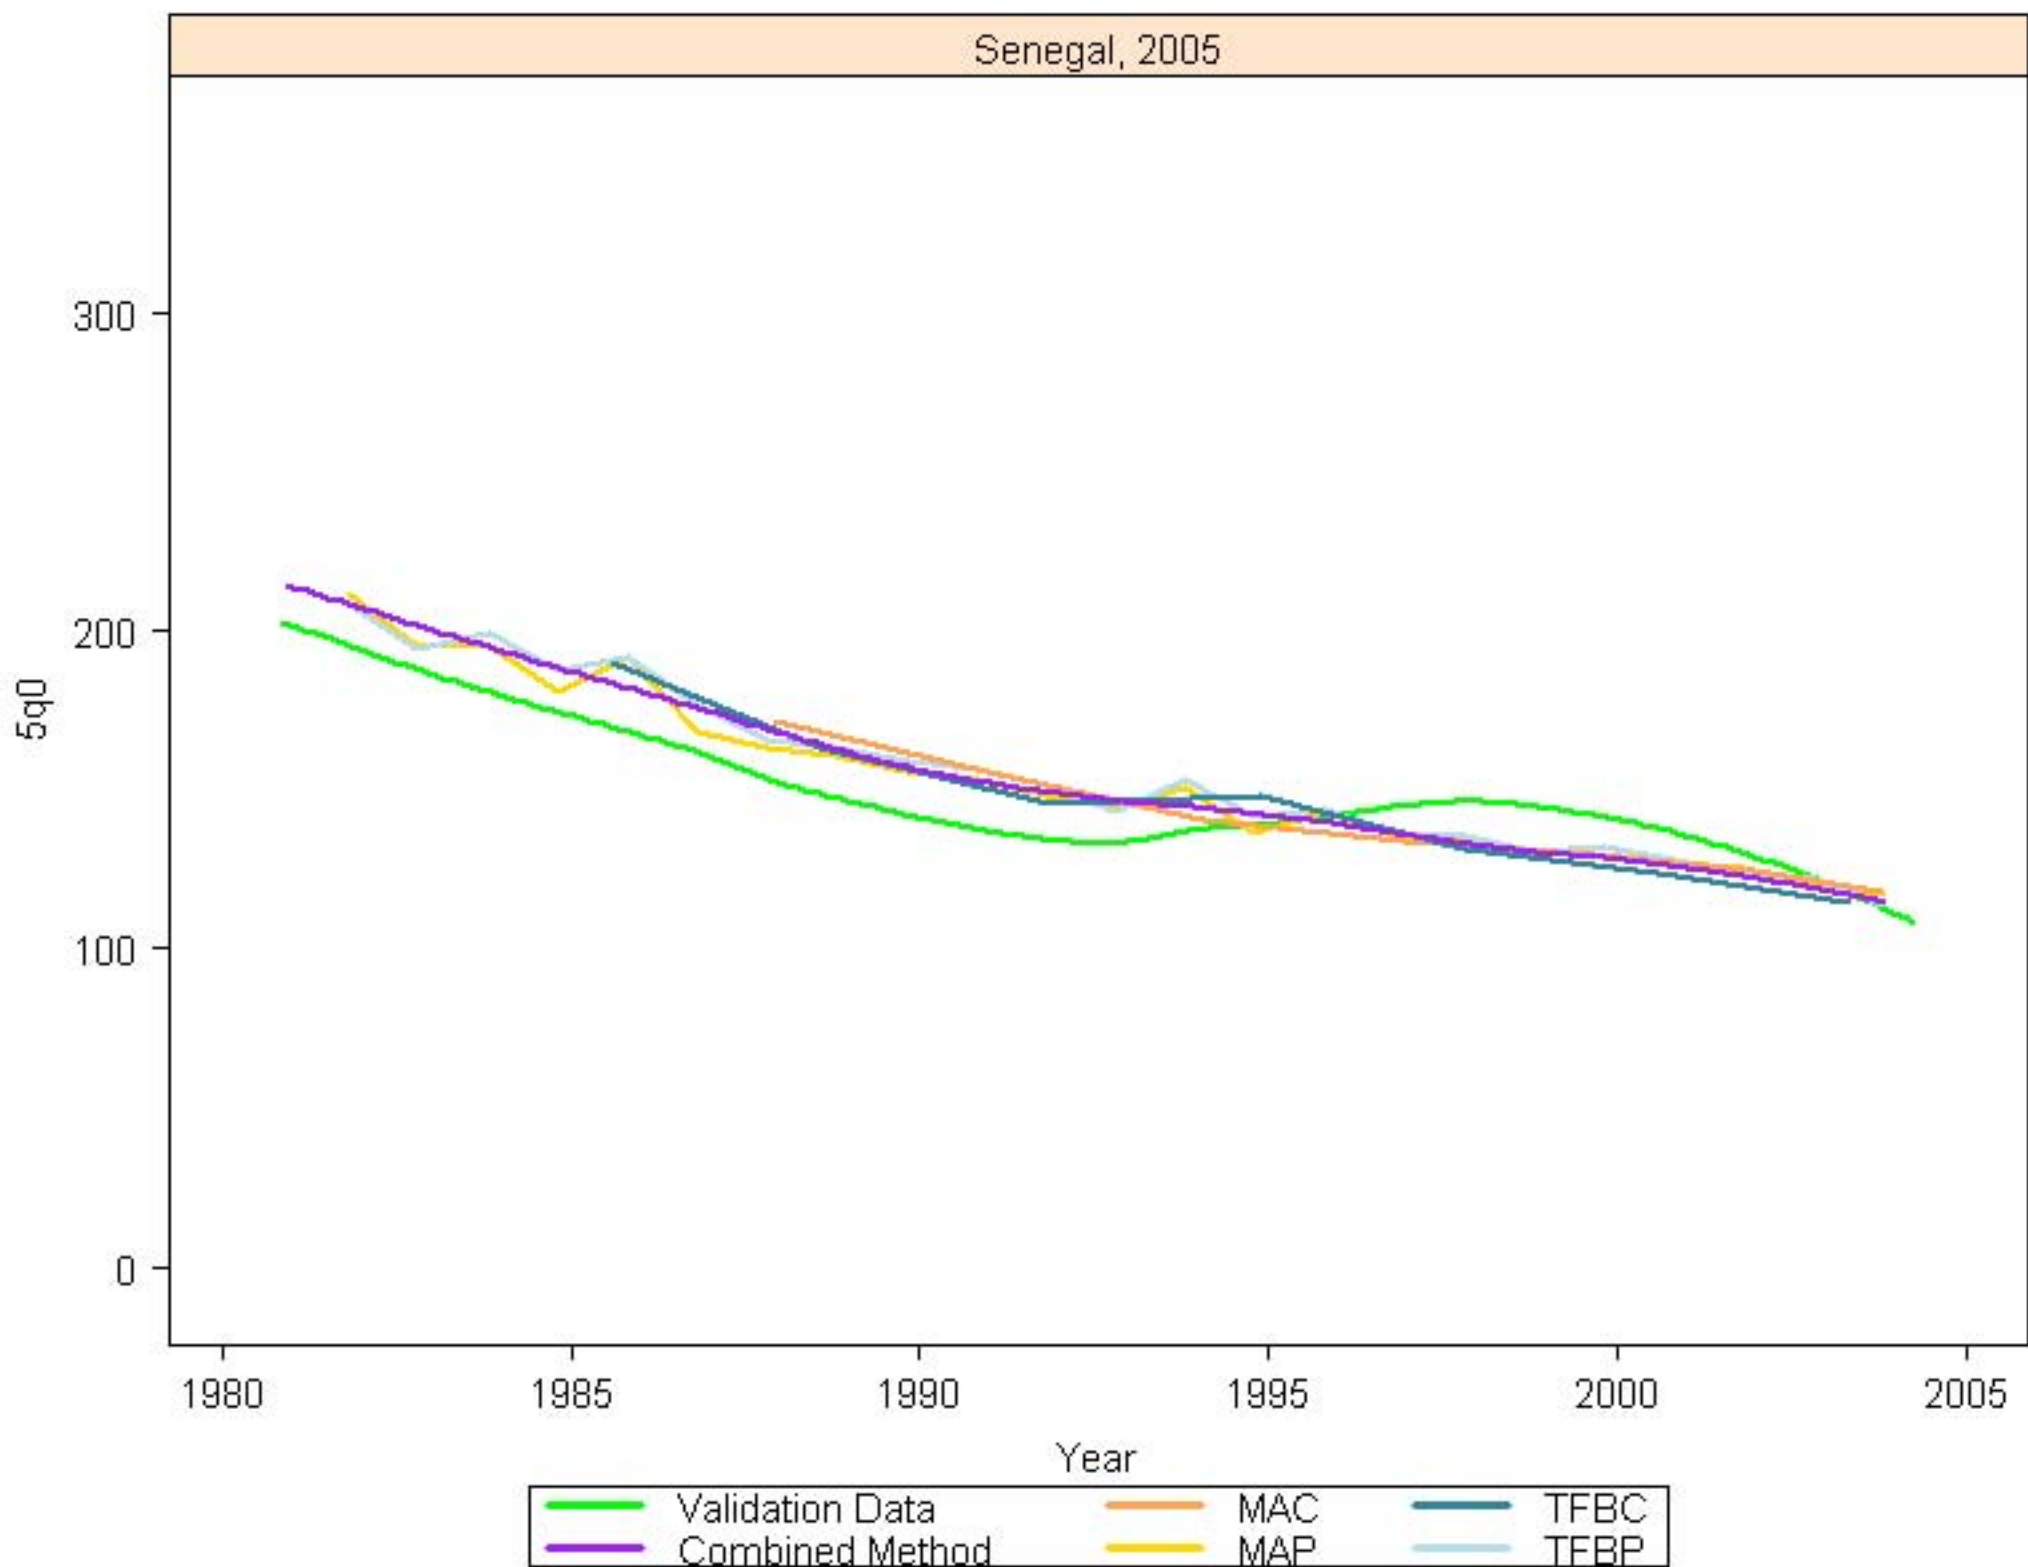

South Africa, 1998

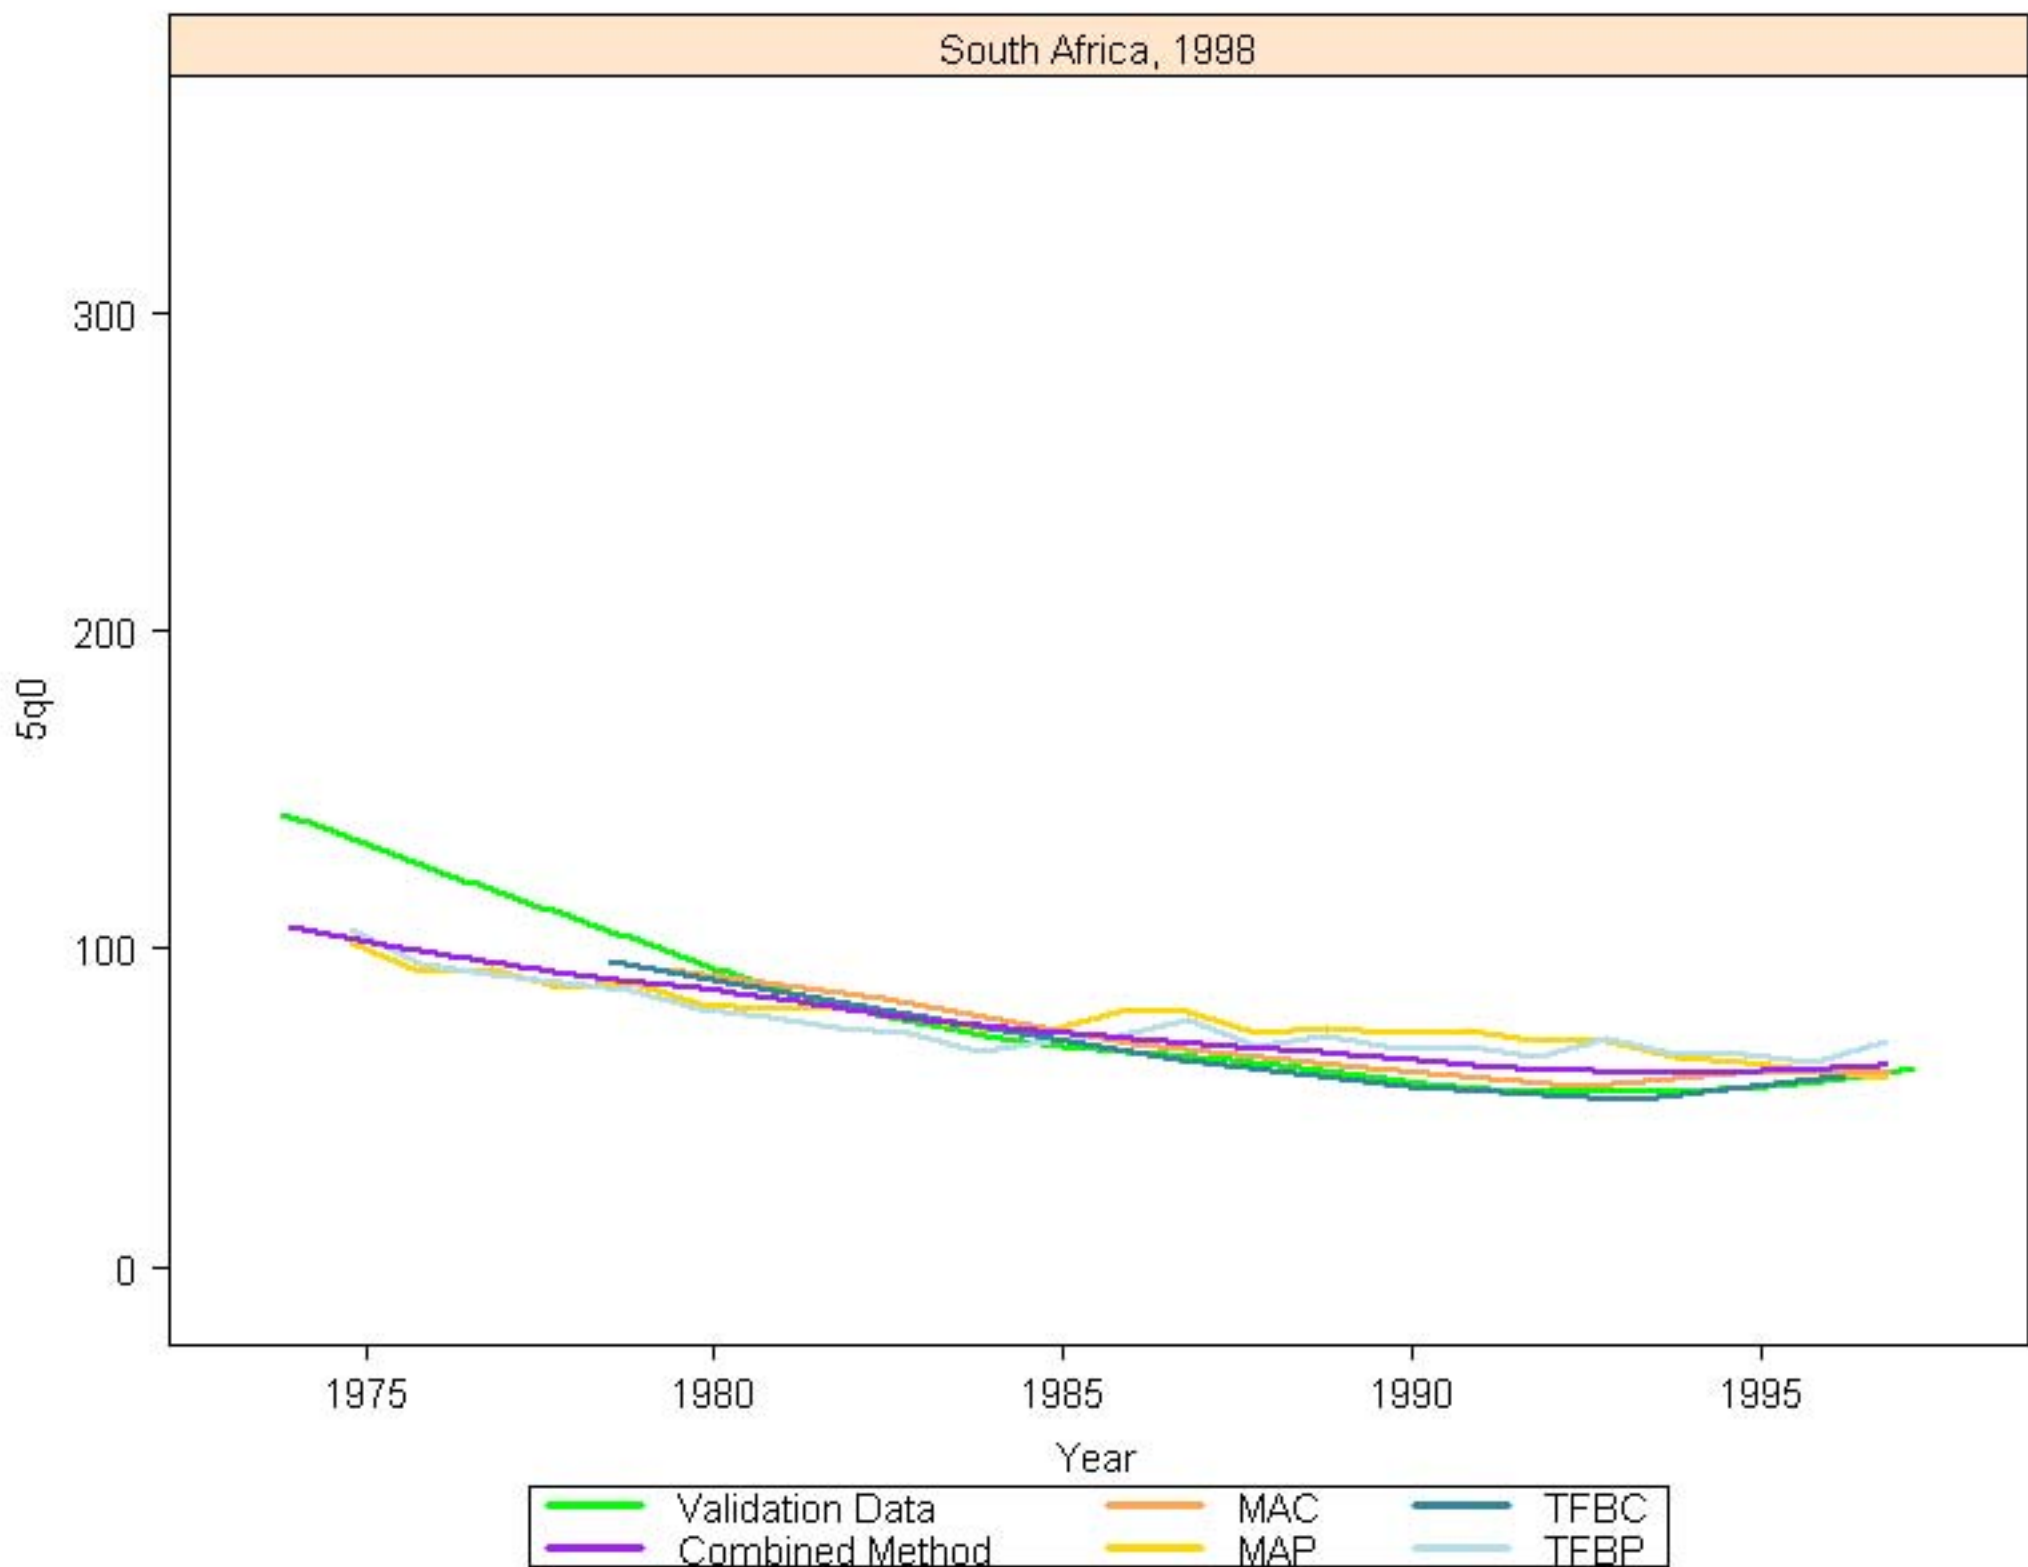



Sri Lanka, 1987

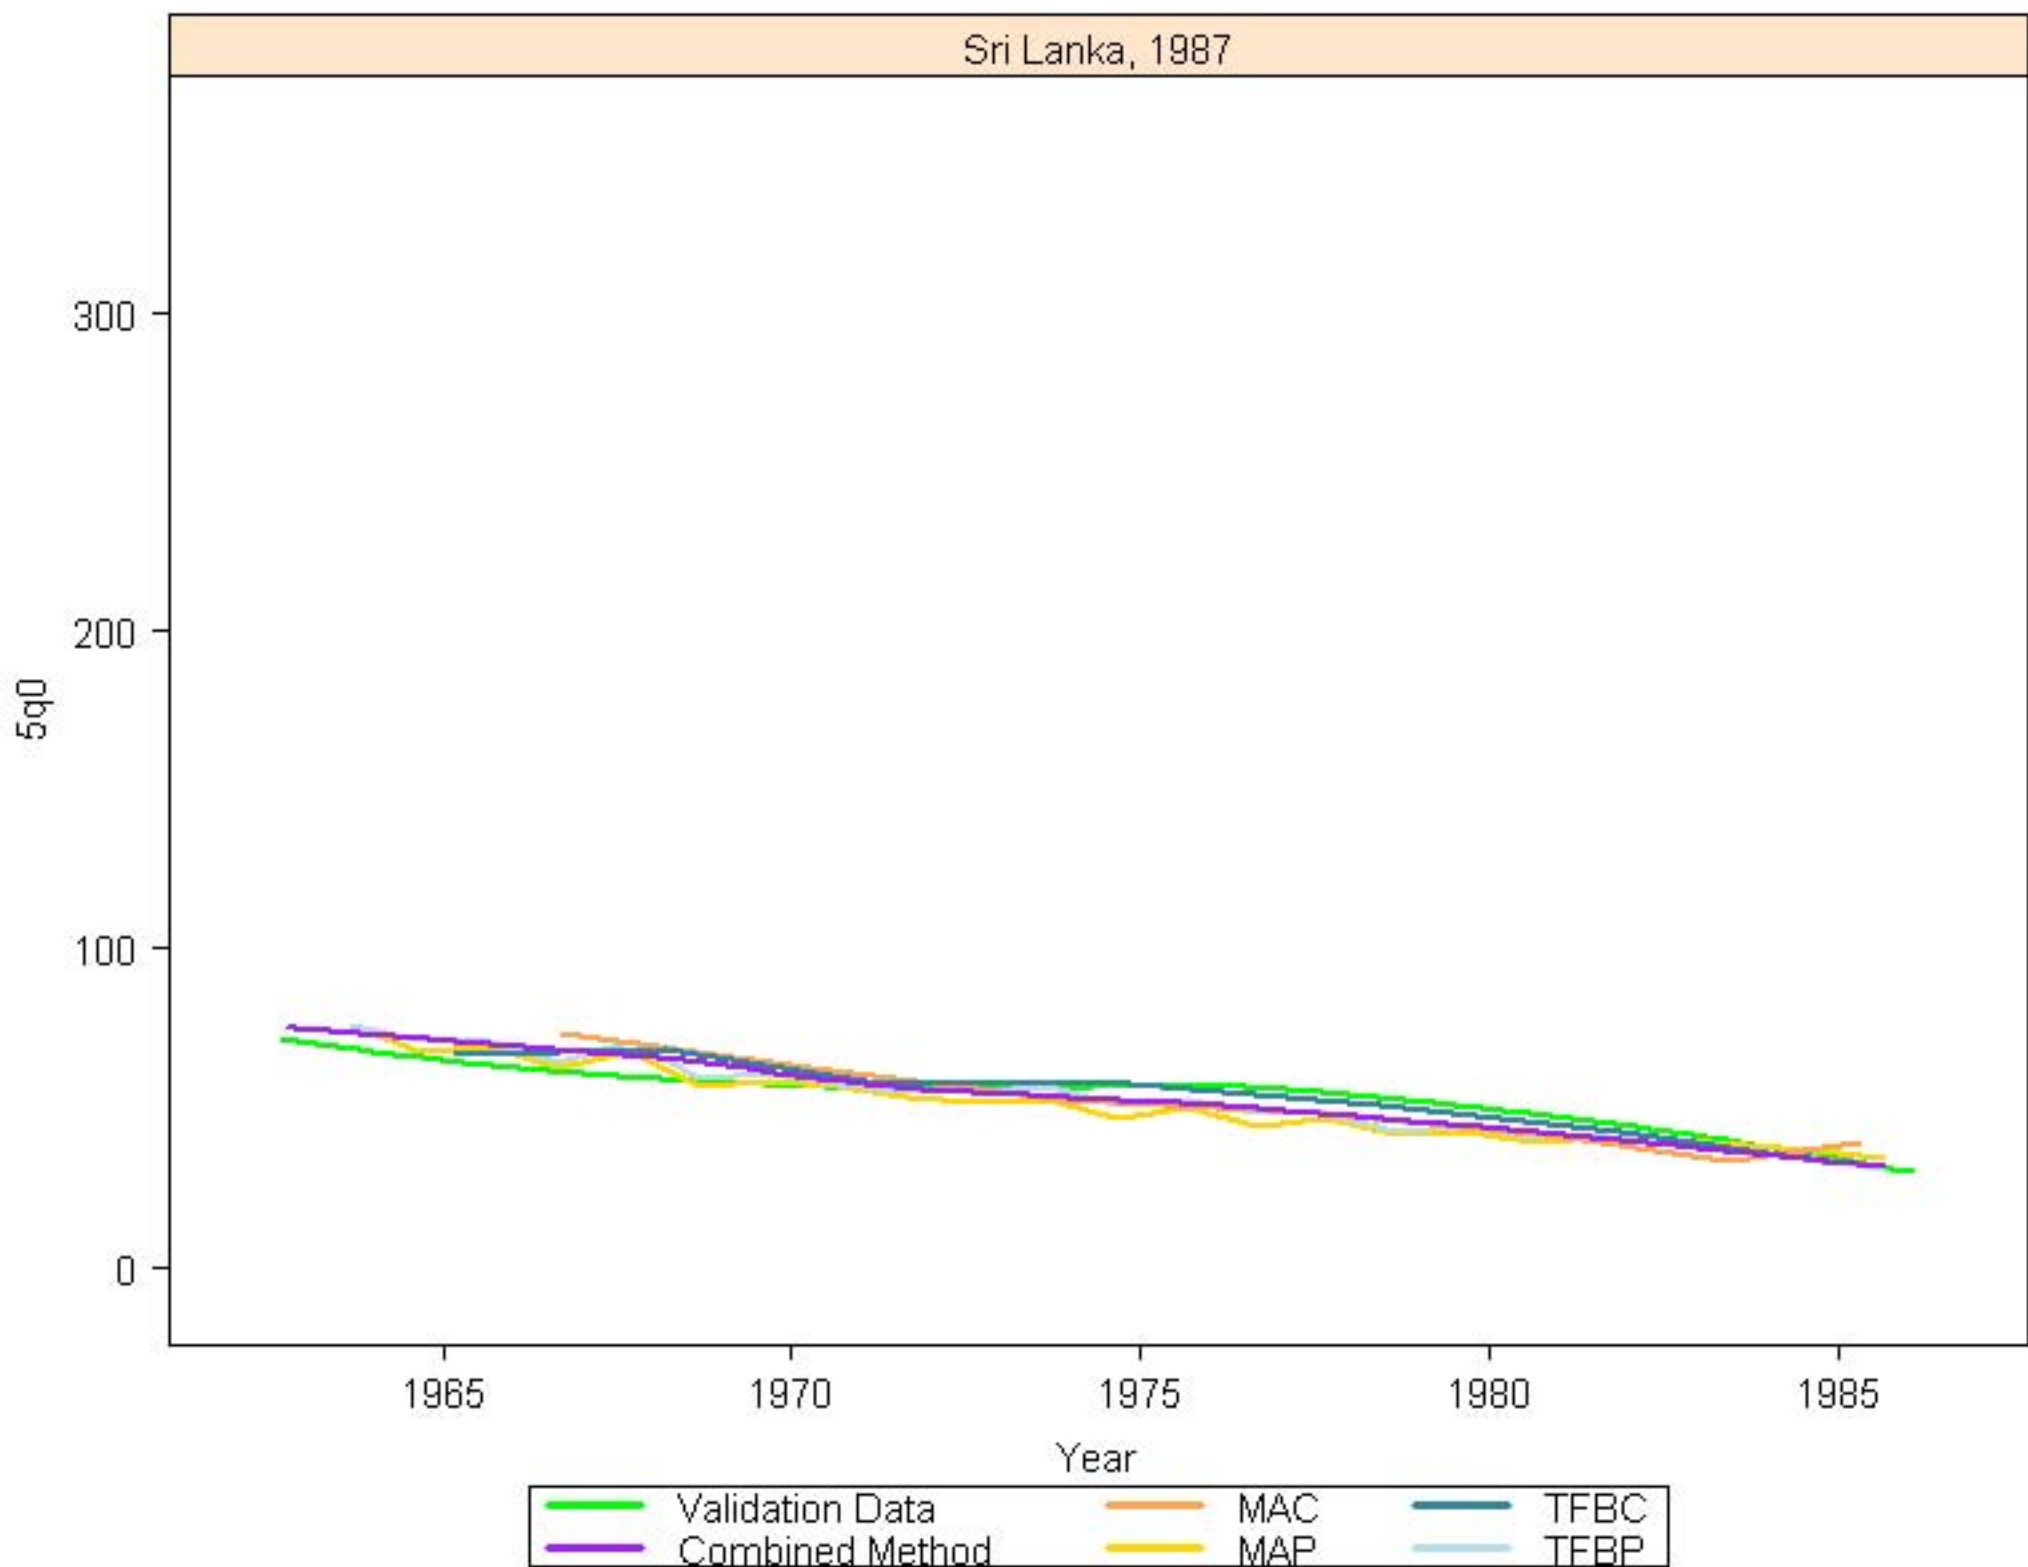

Sudan, 1990

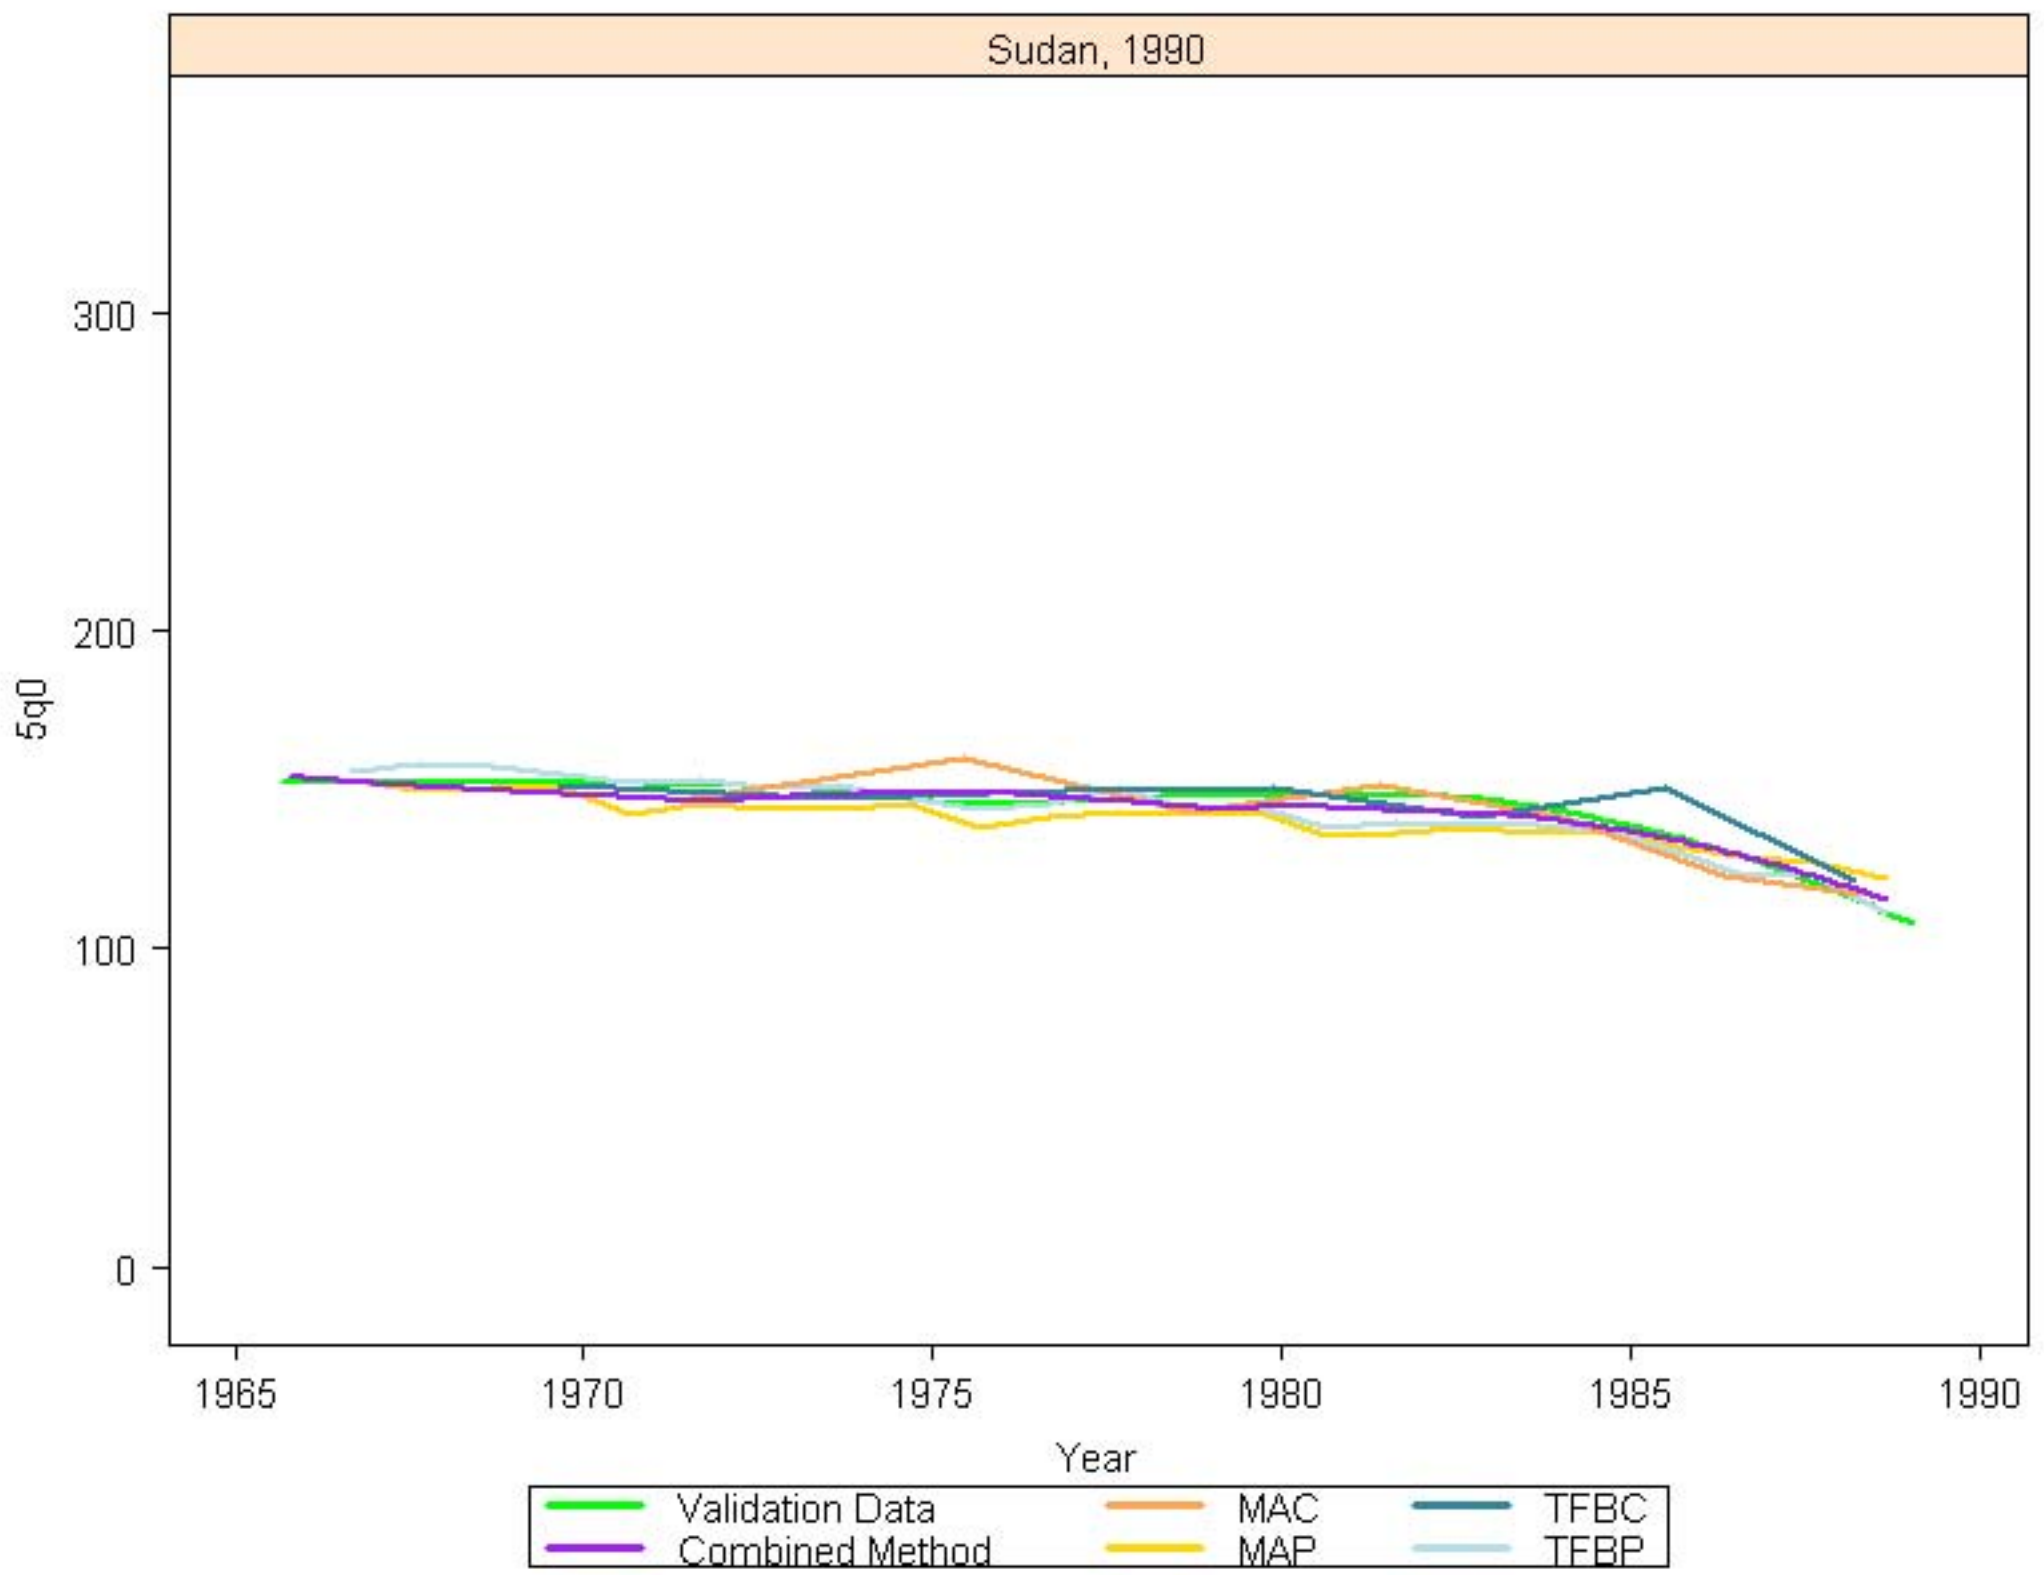

Swaziland, 2007

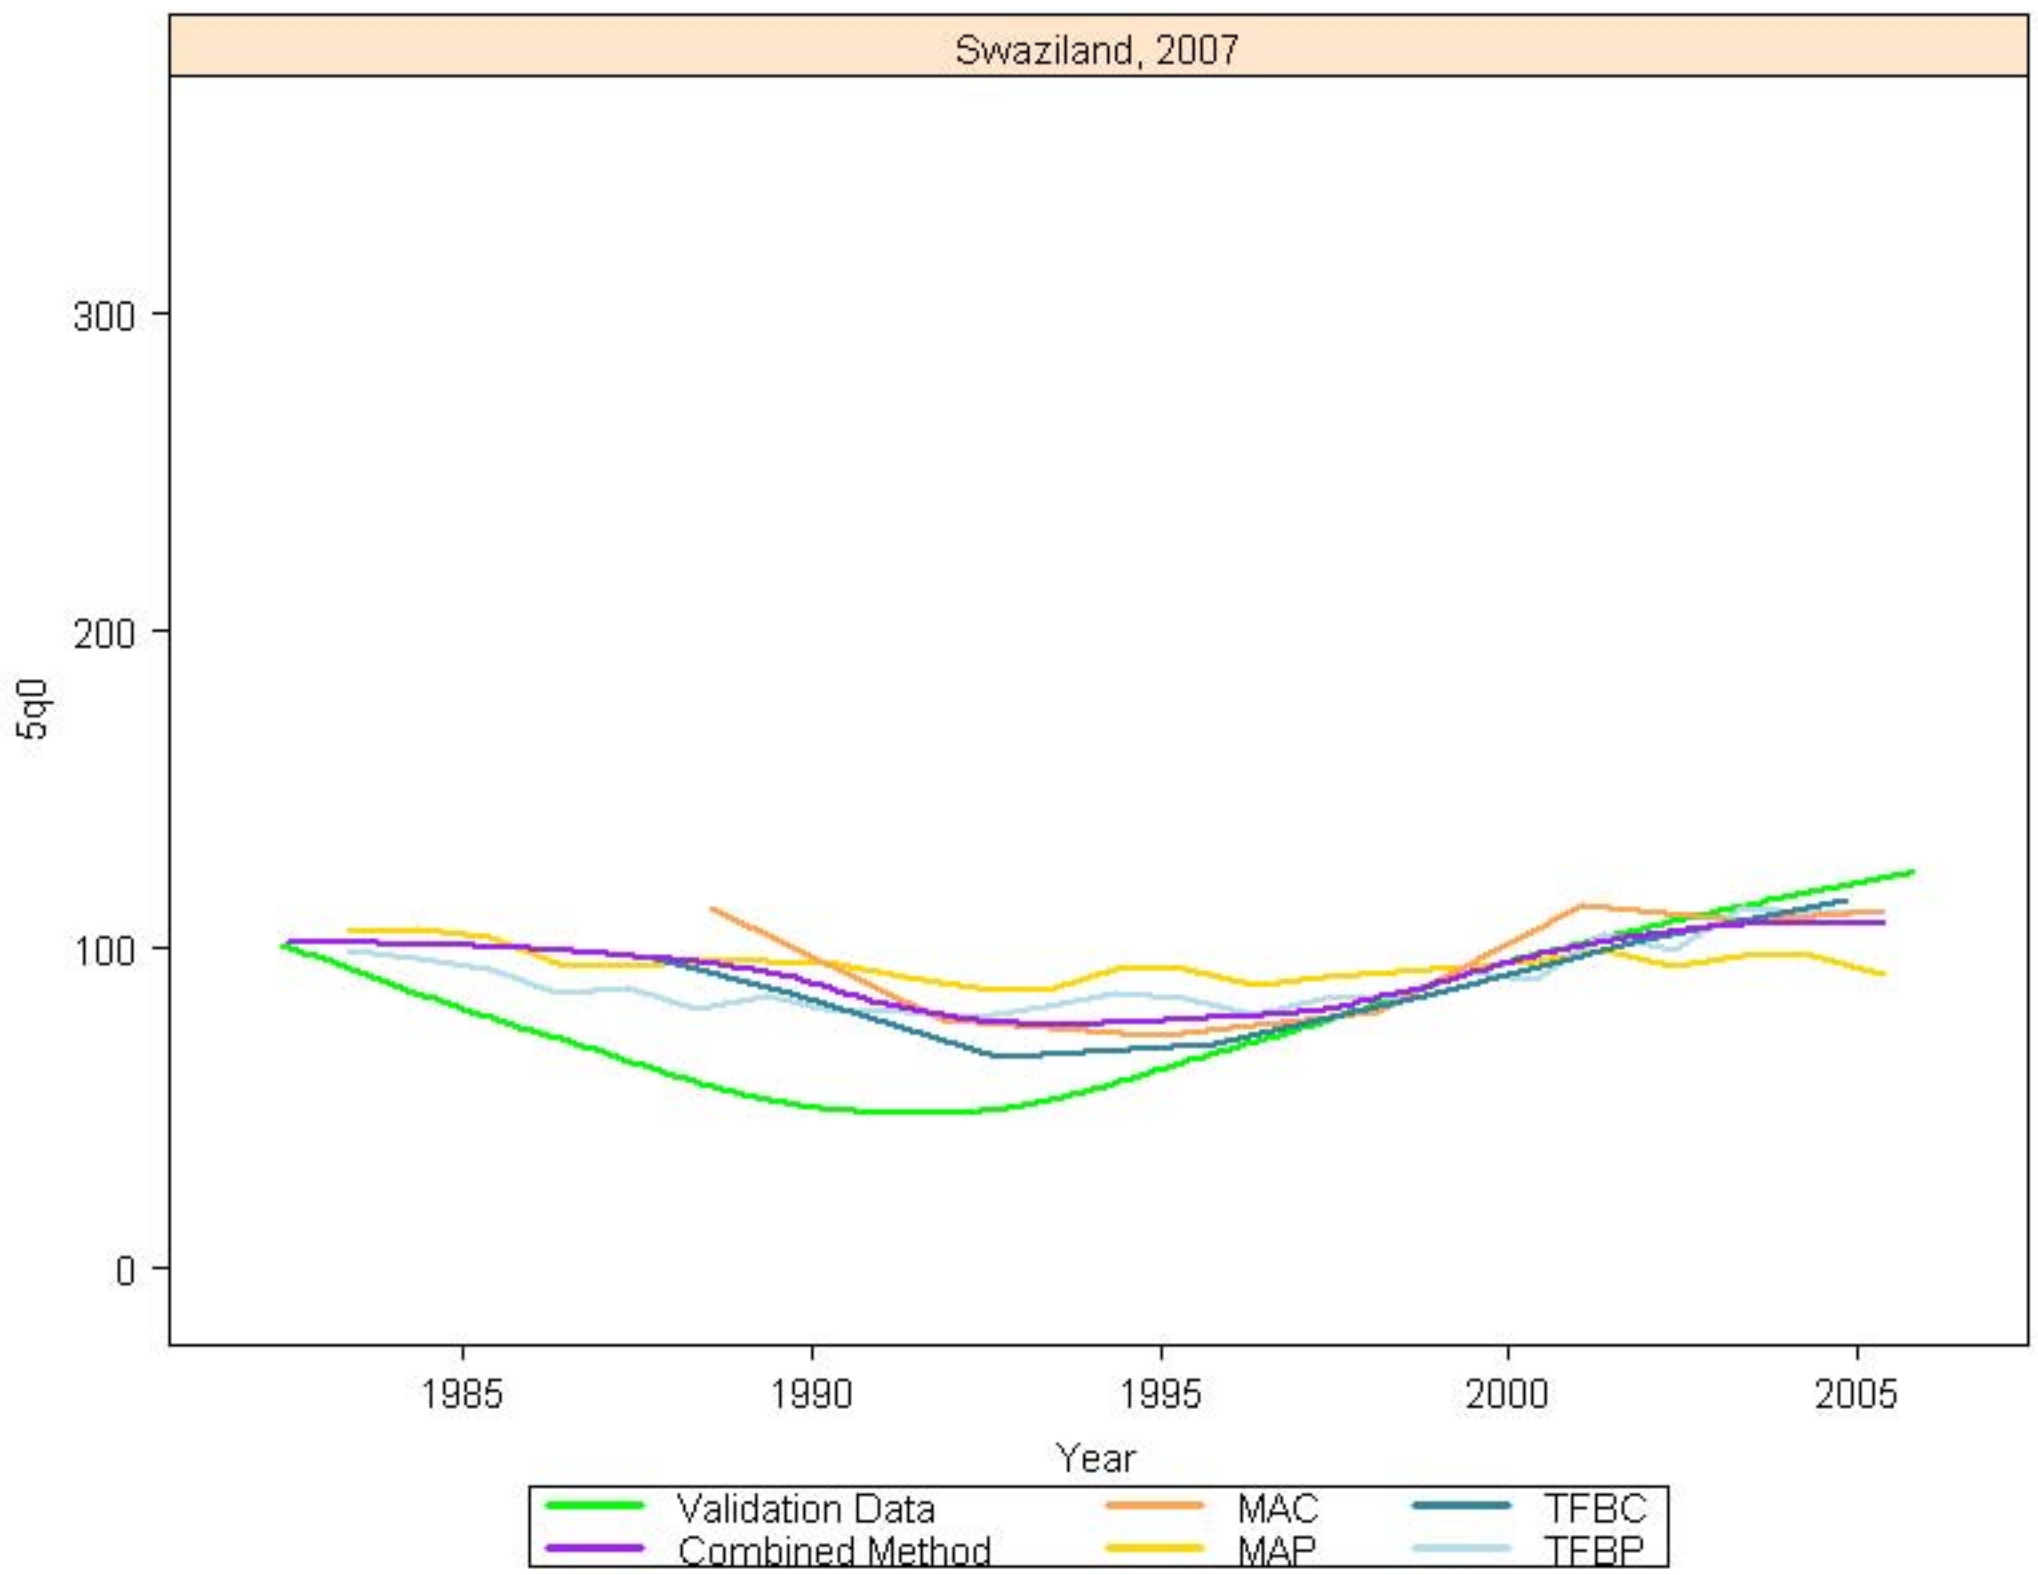

Tanzania, 1992

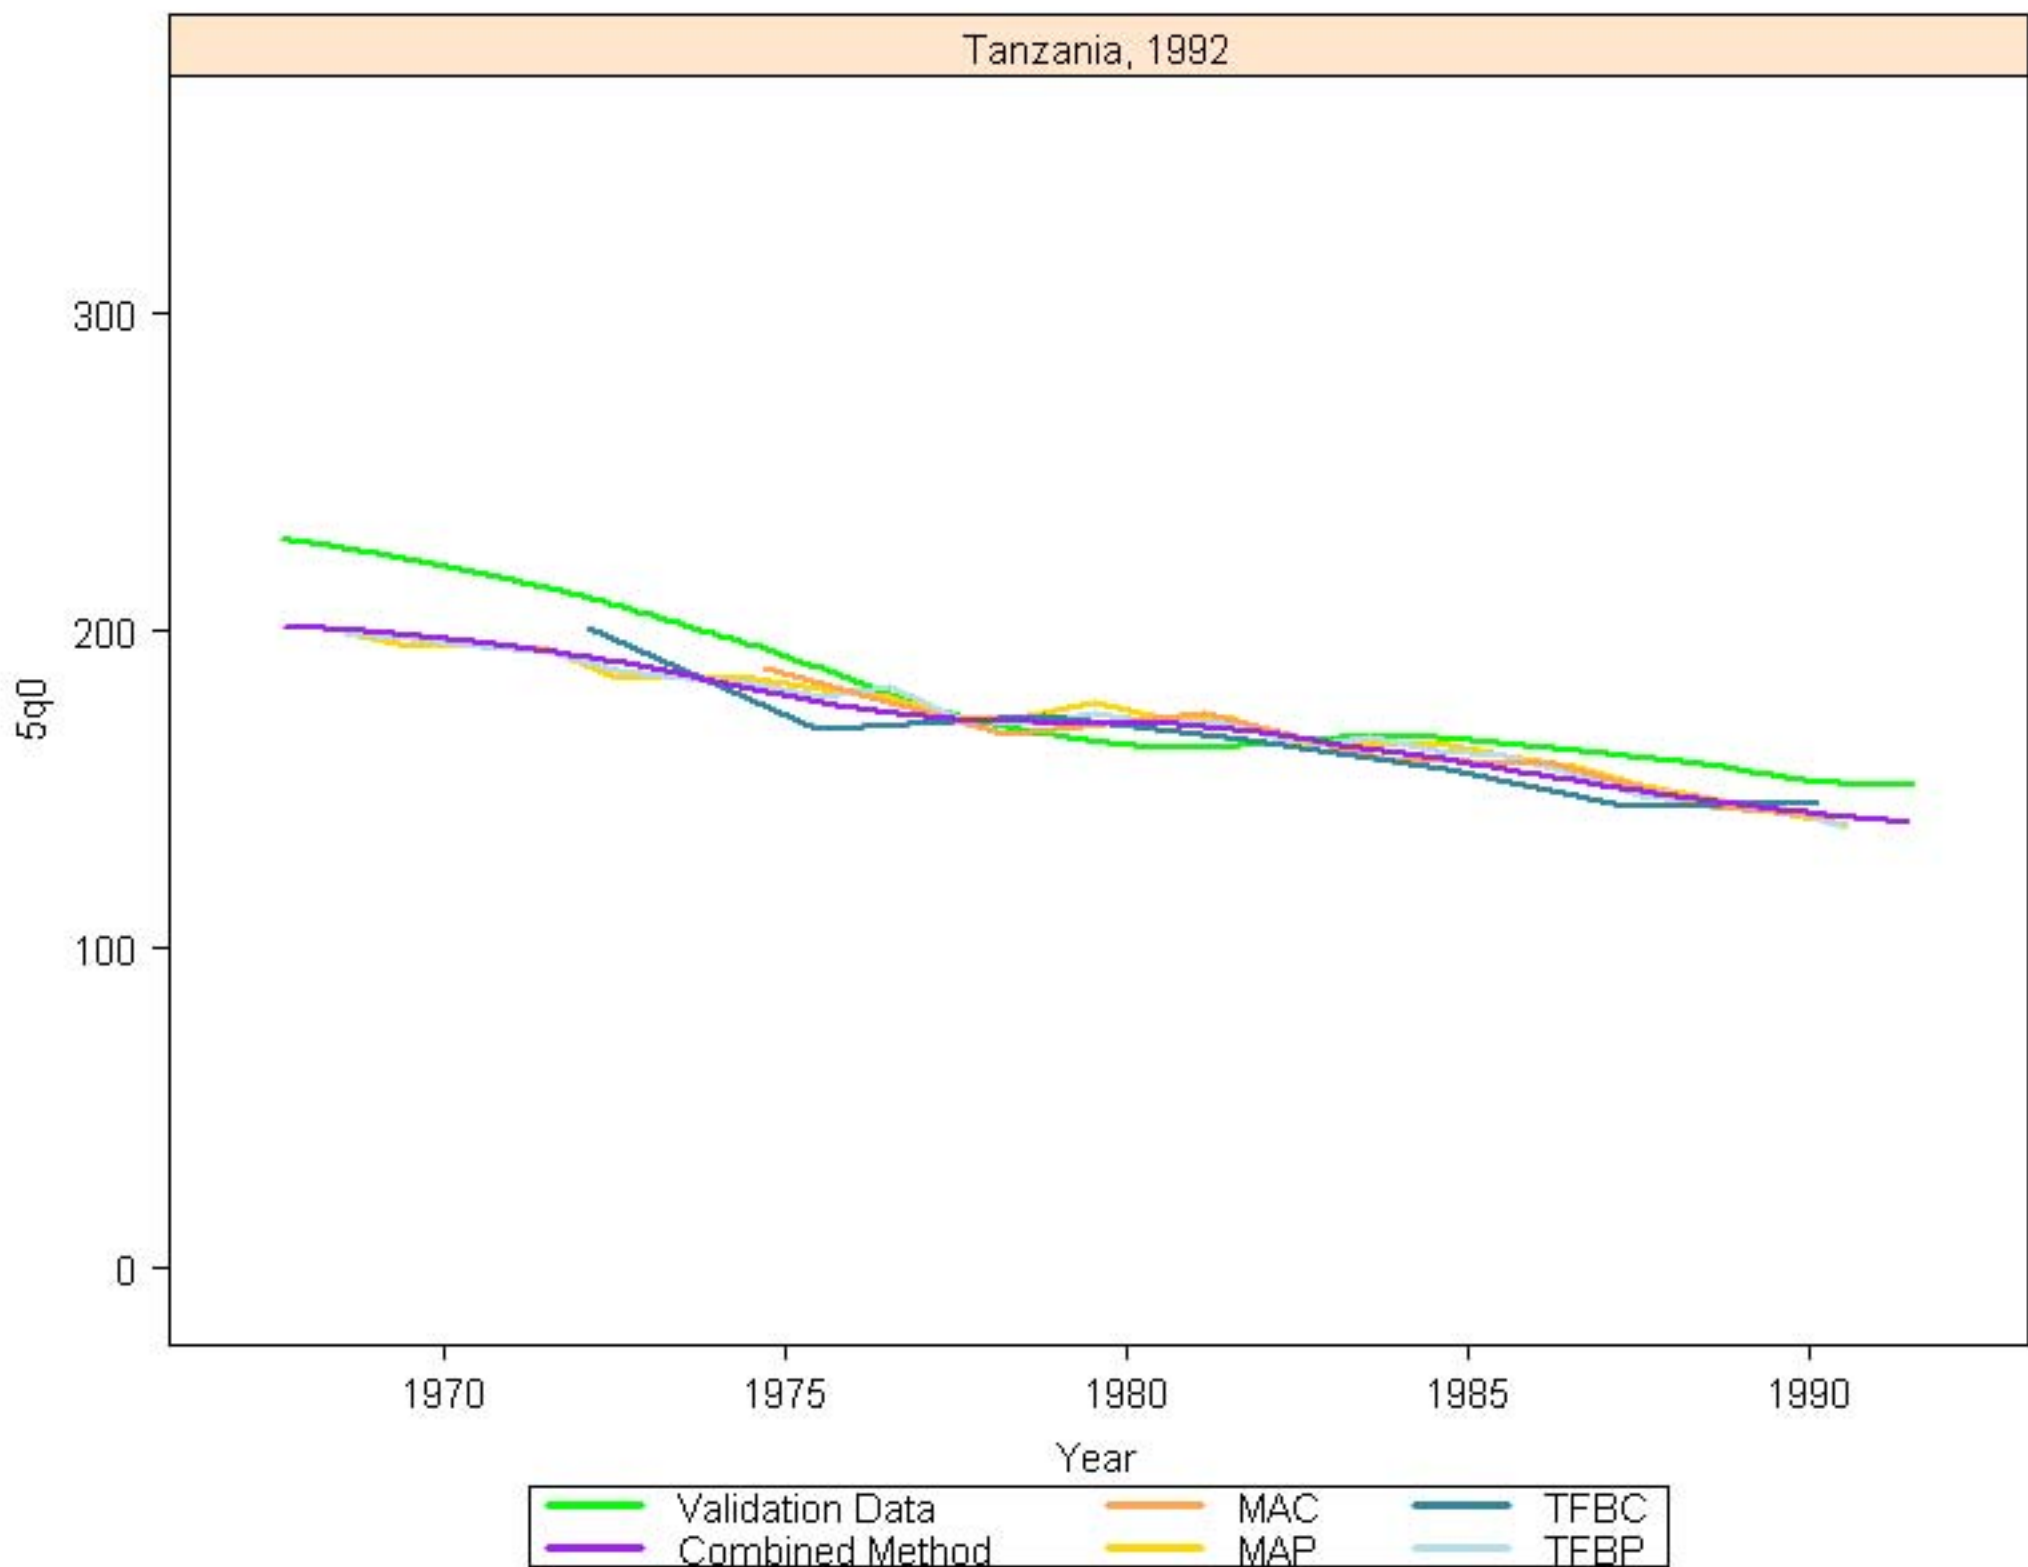

Tanzania, 1997

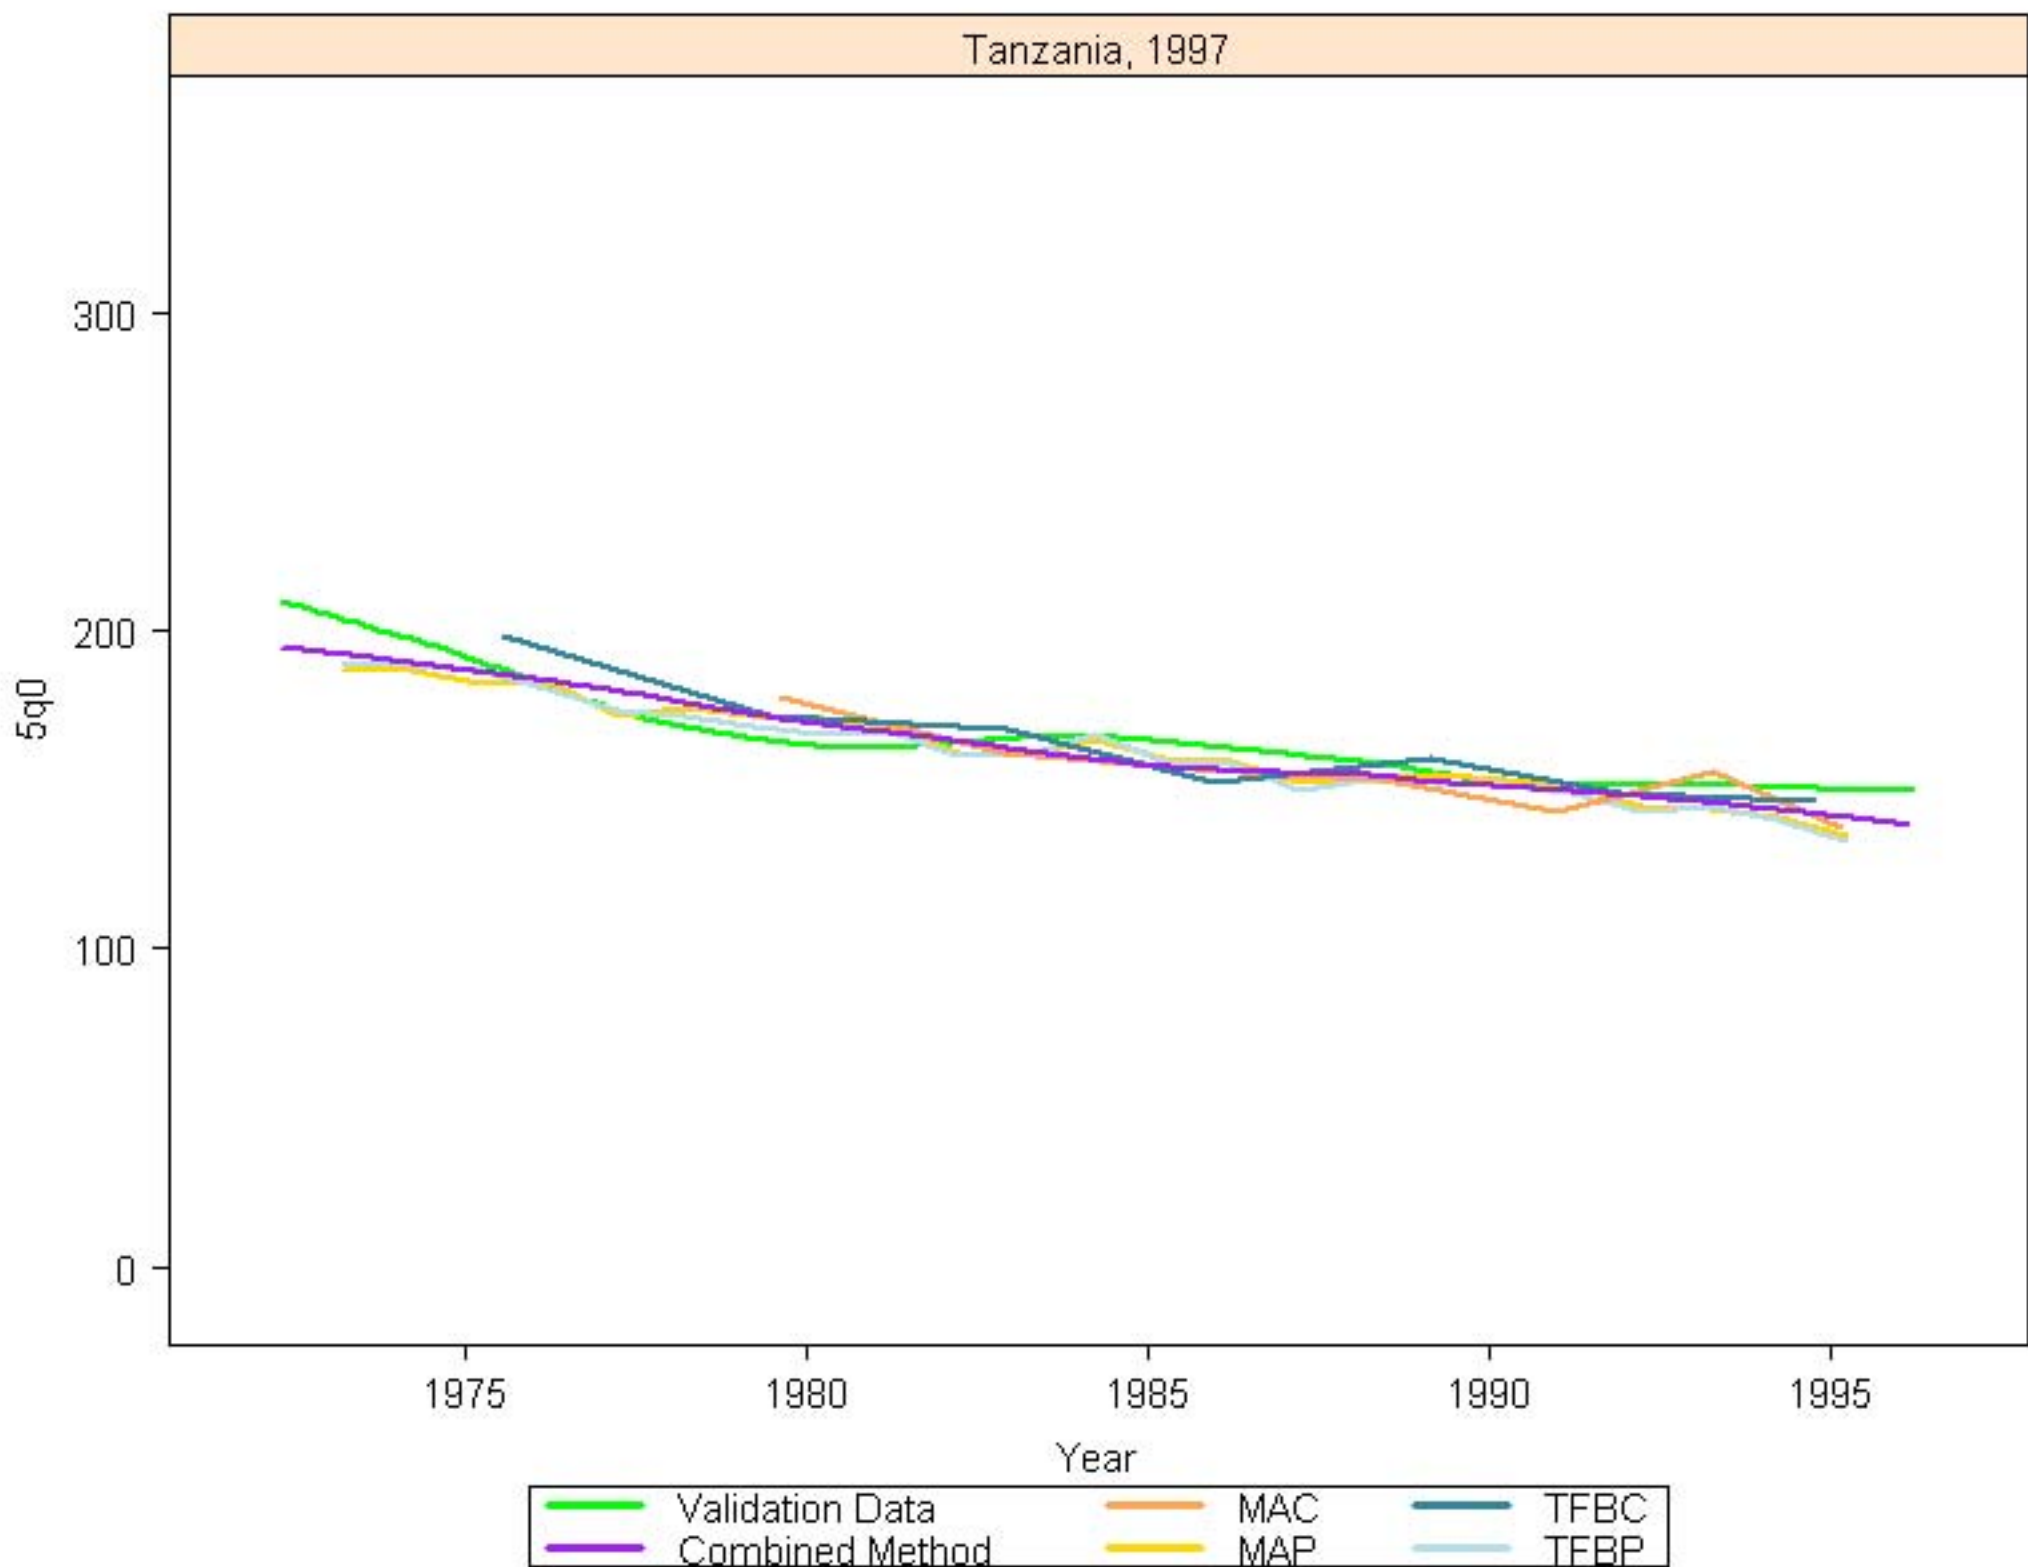

Tanzania, 2000

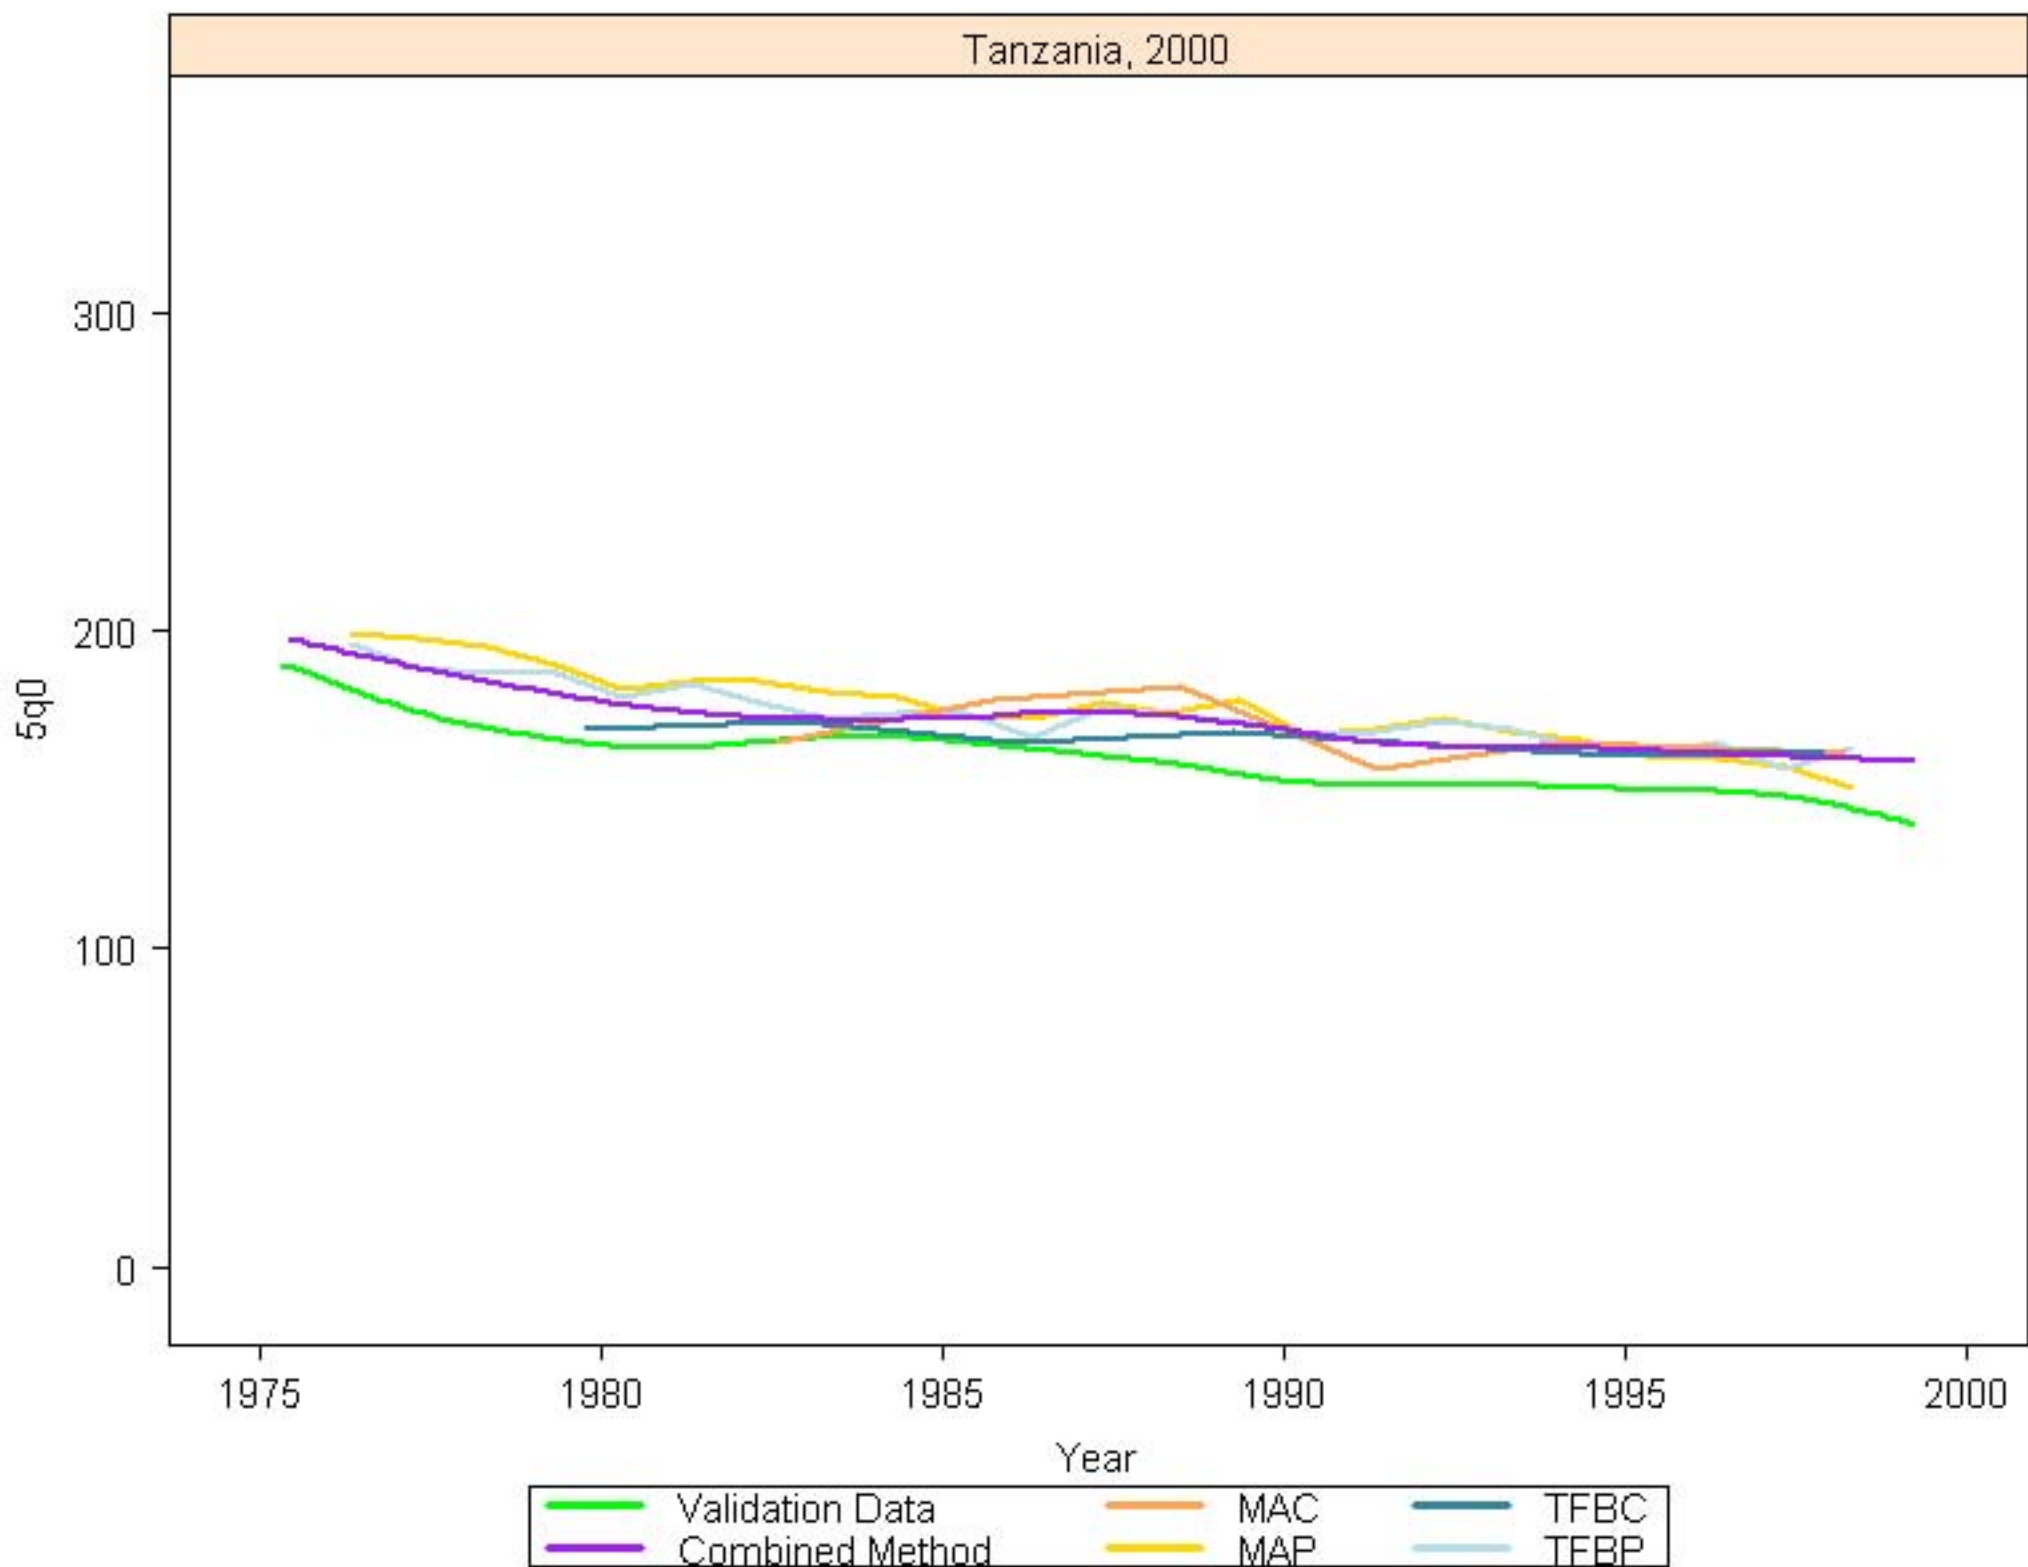

Tanzania, 2005

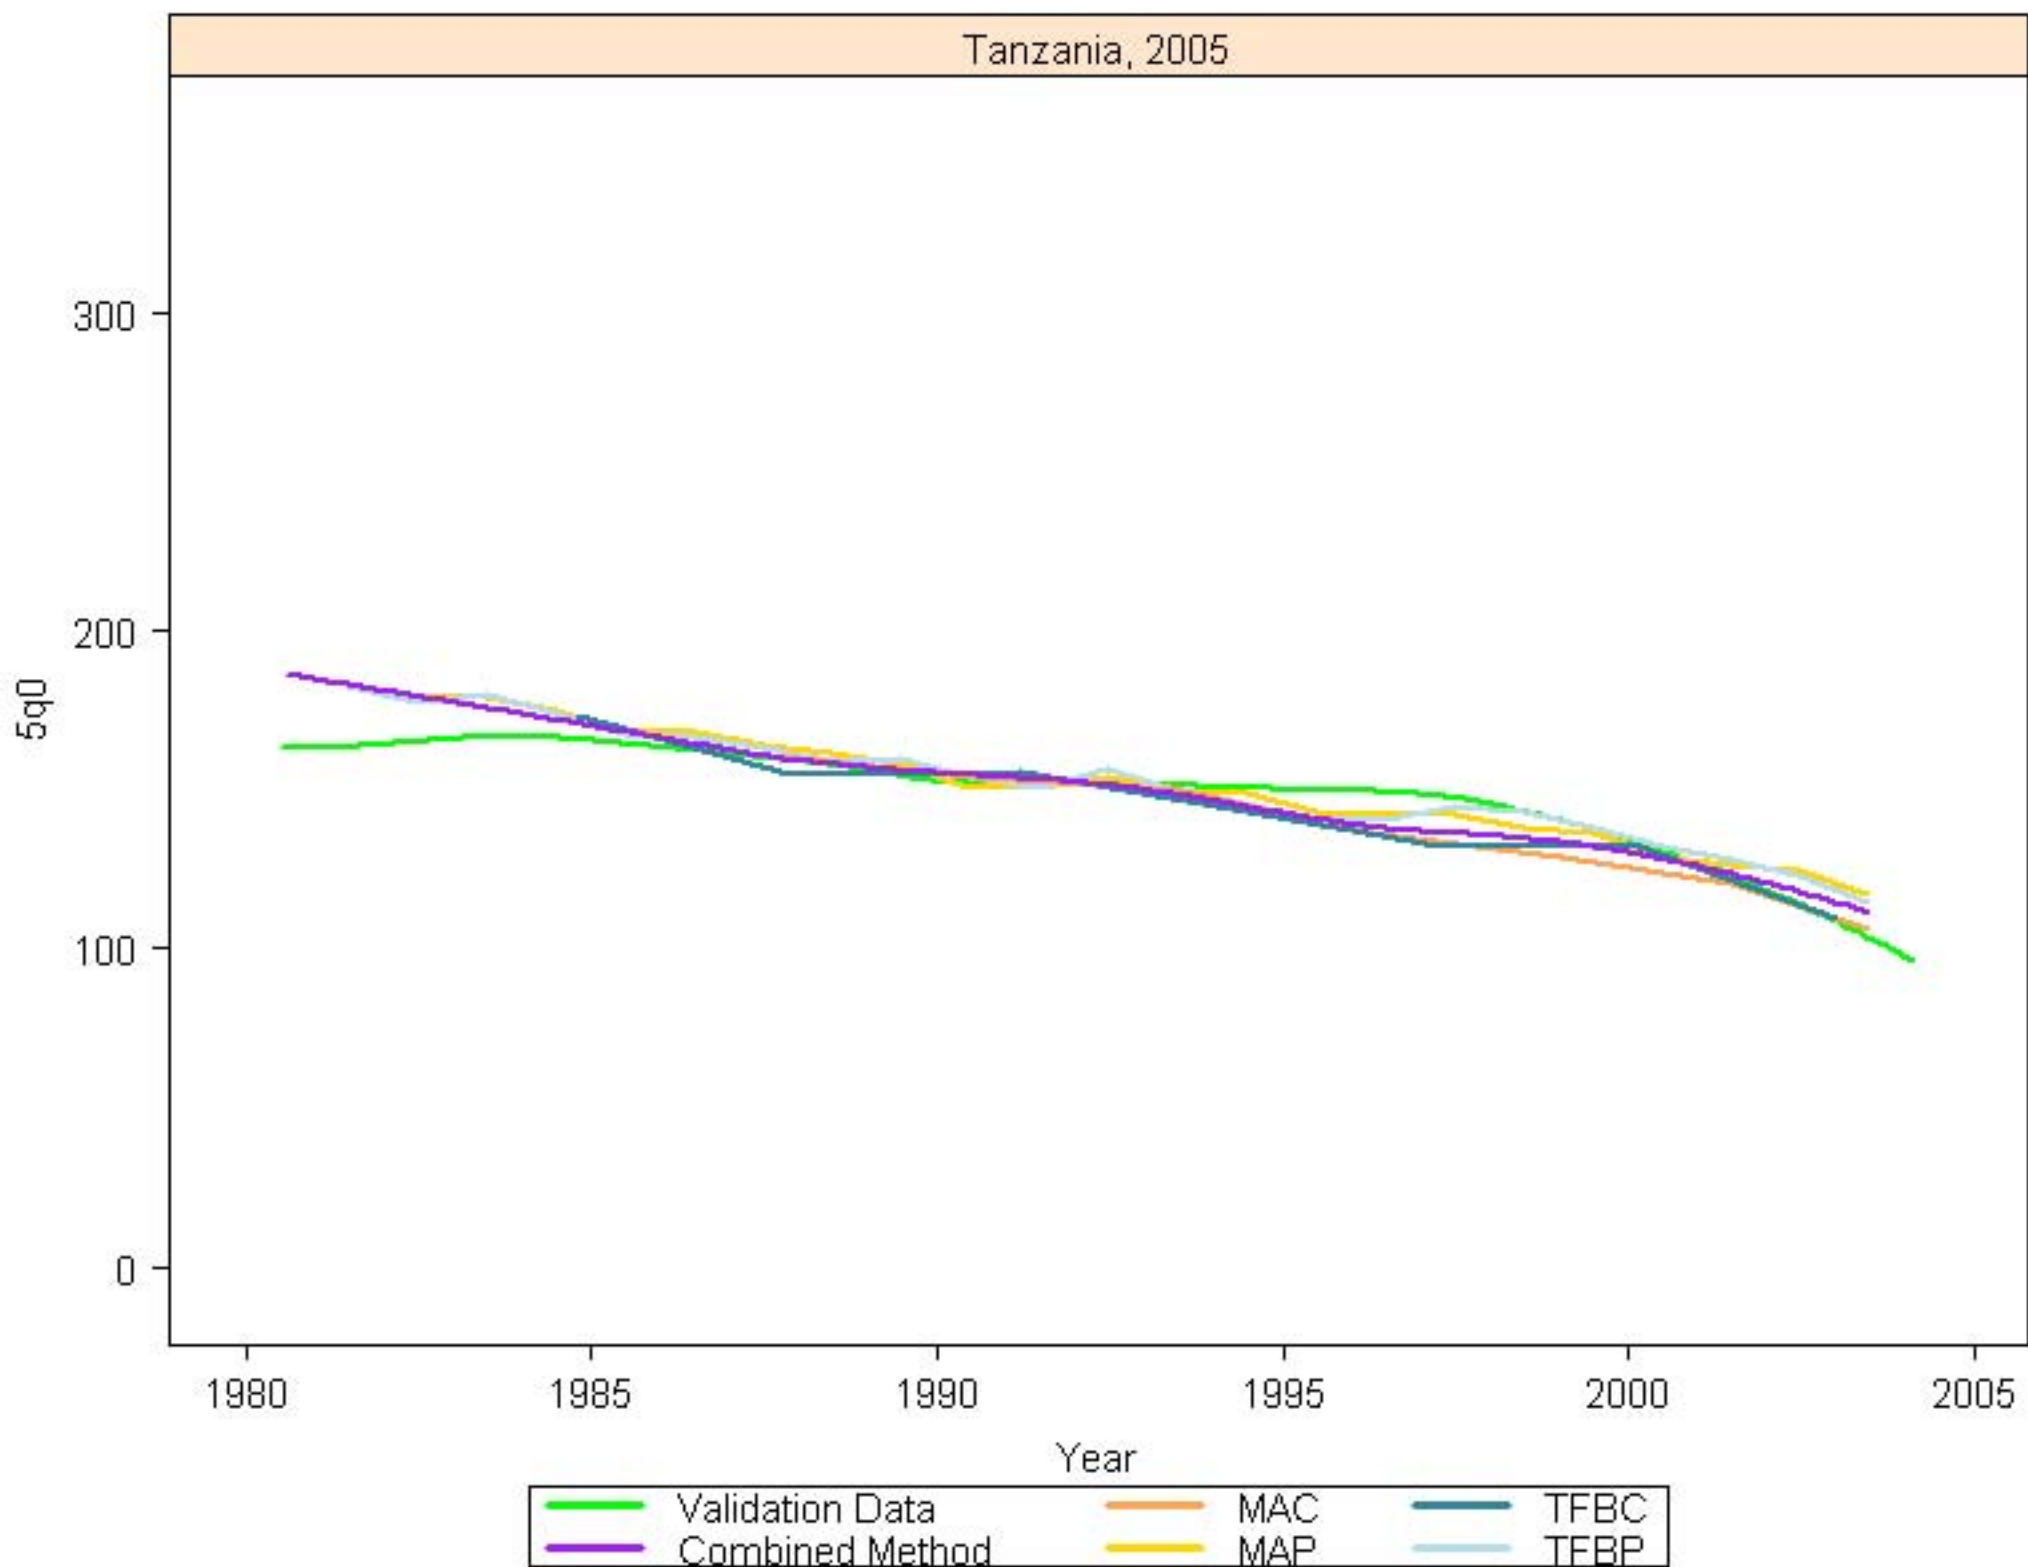

Thailand, 1987

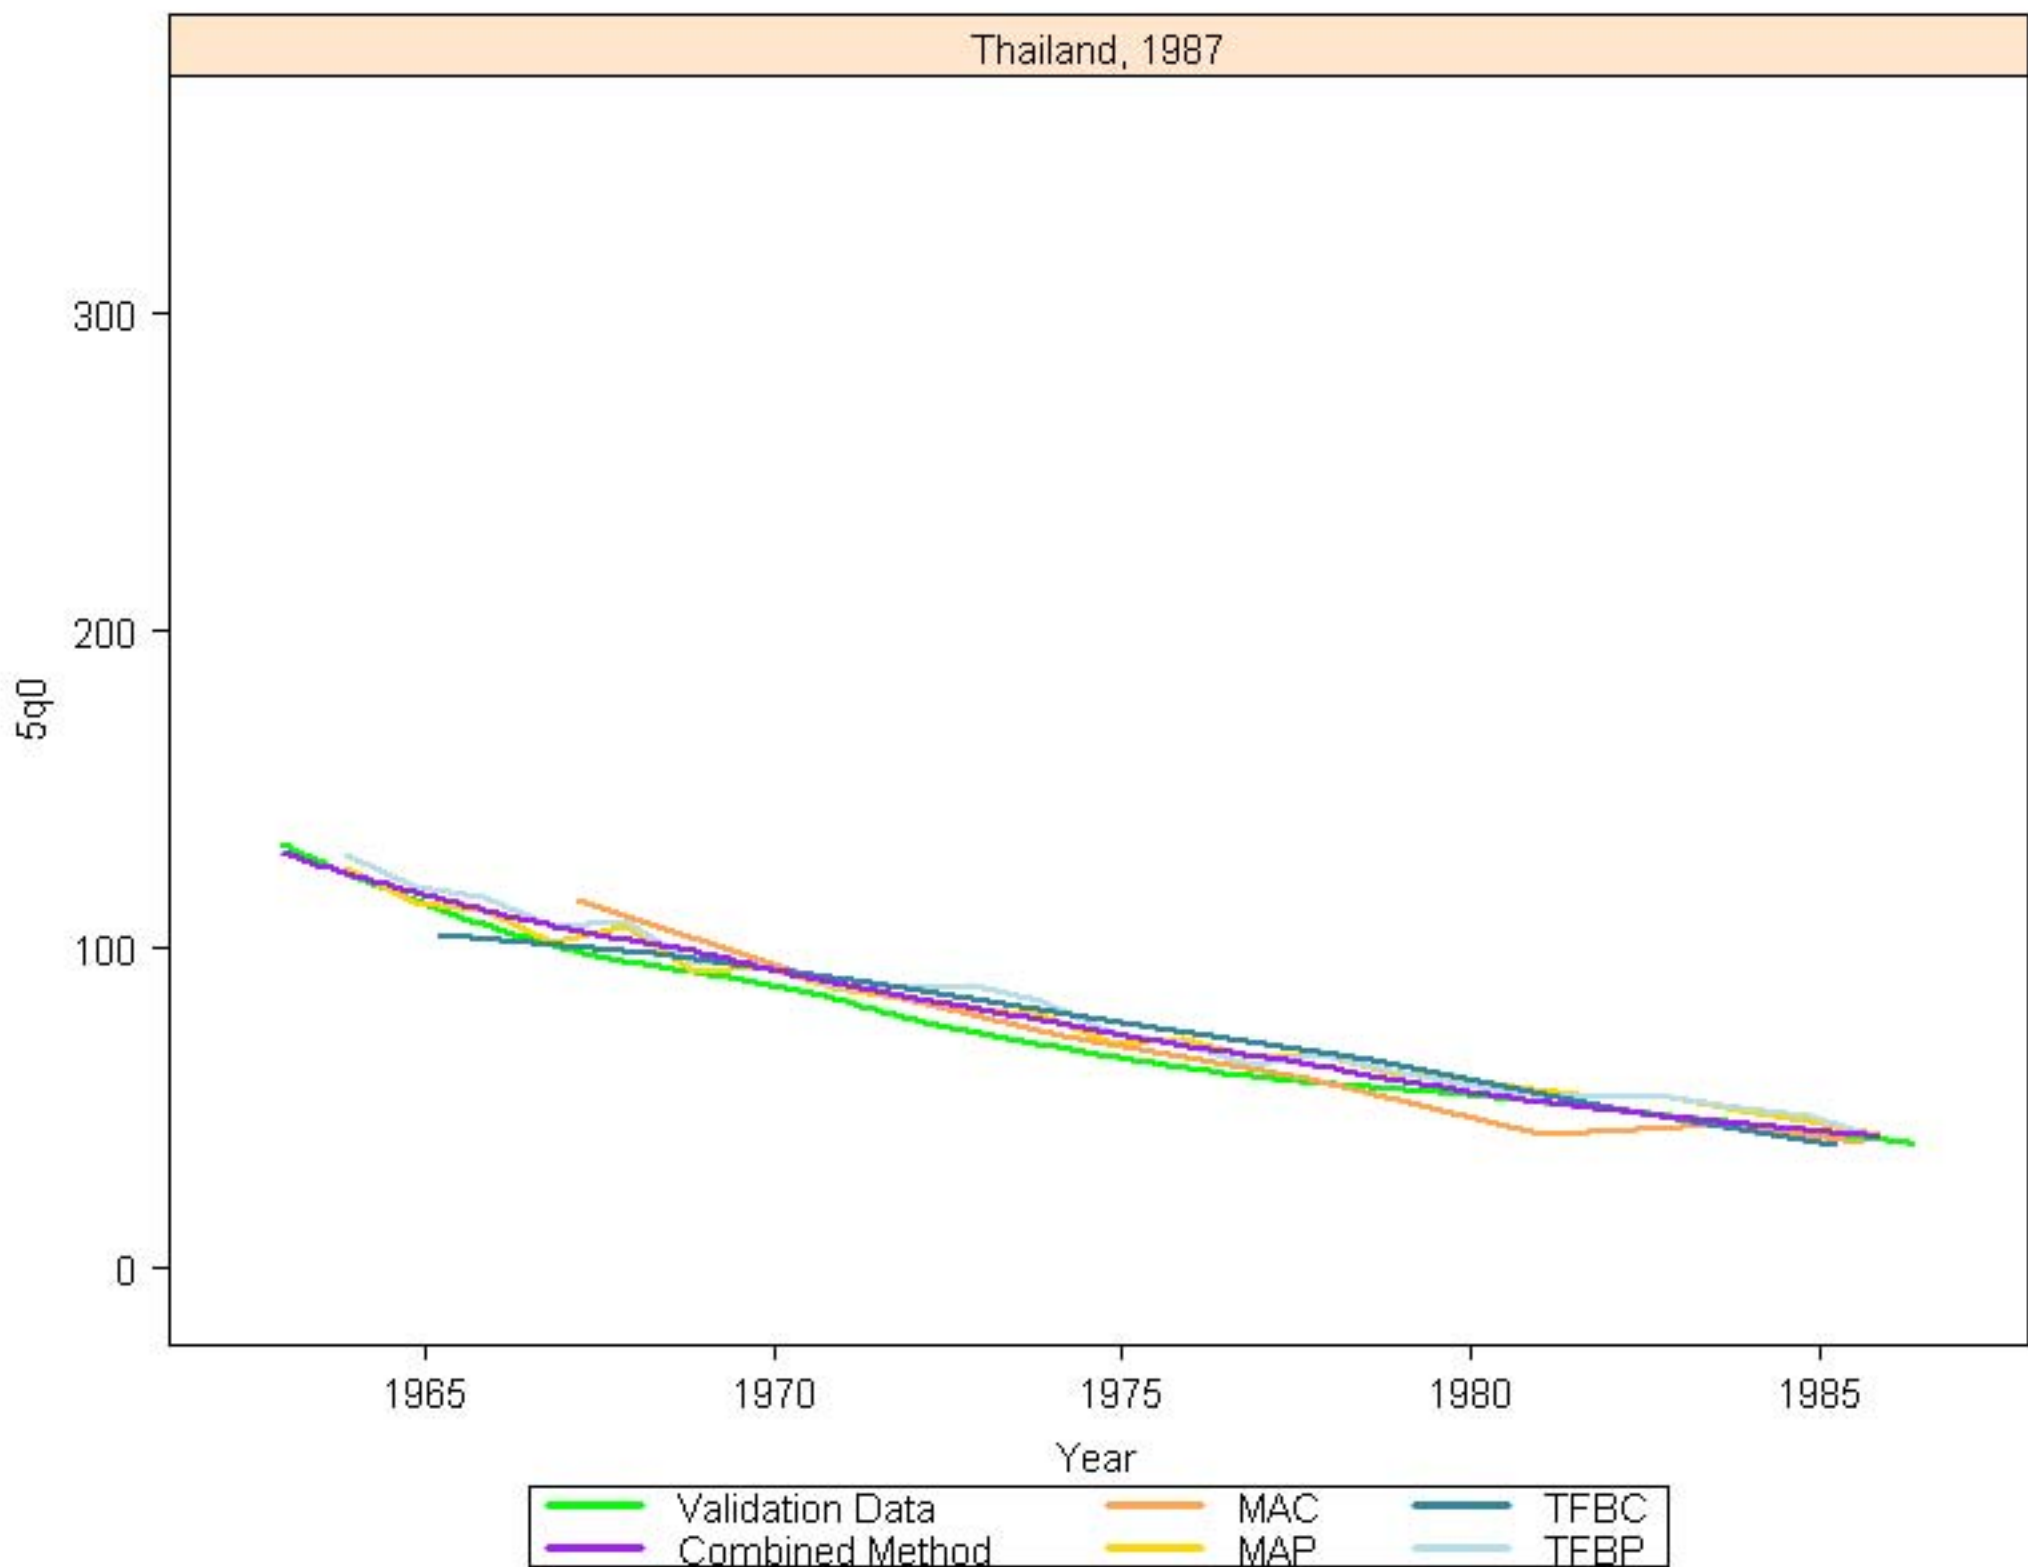



Togo, 1989

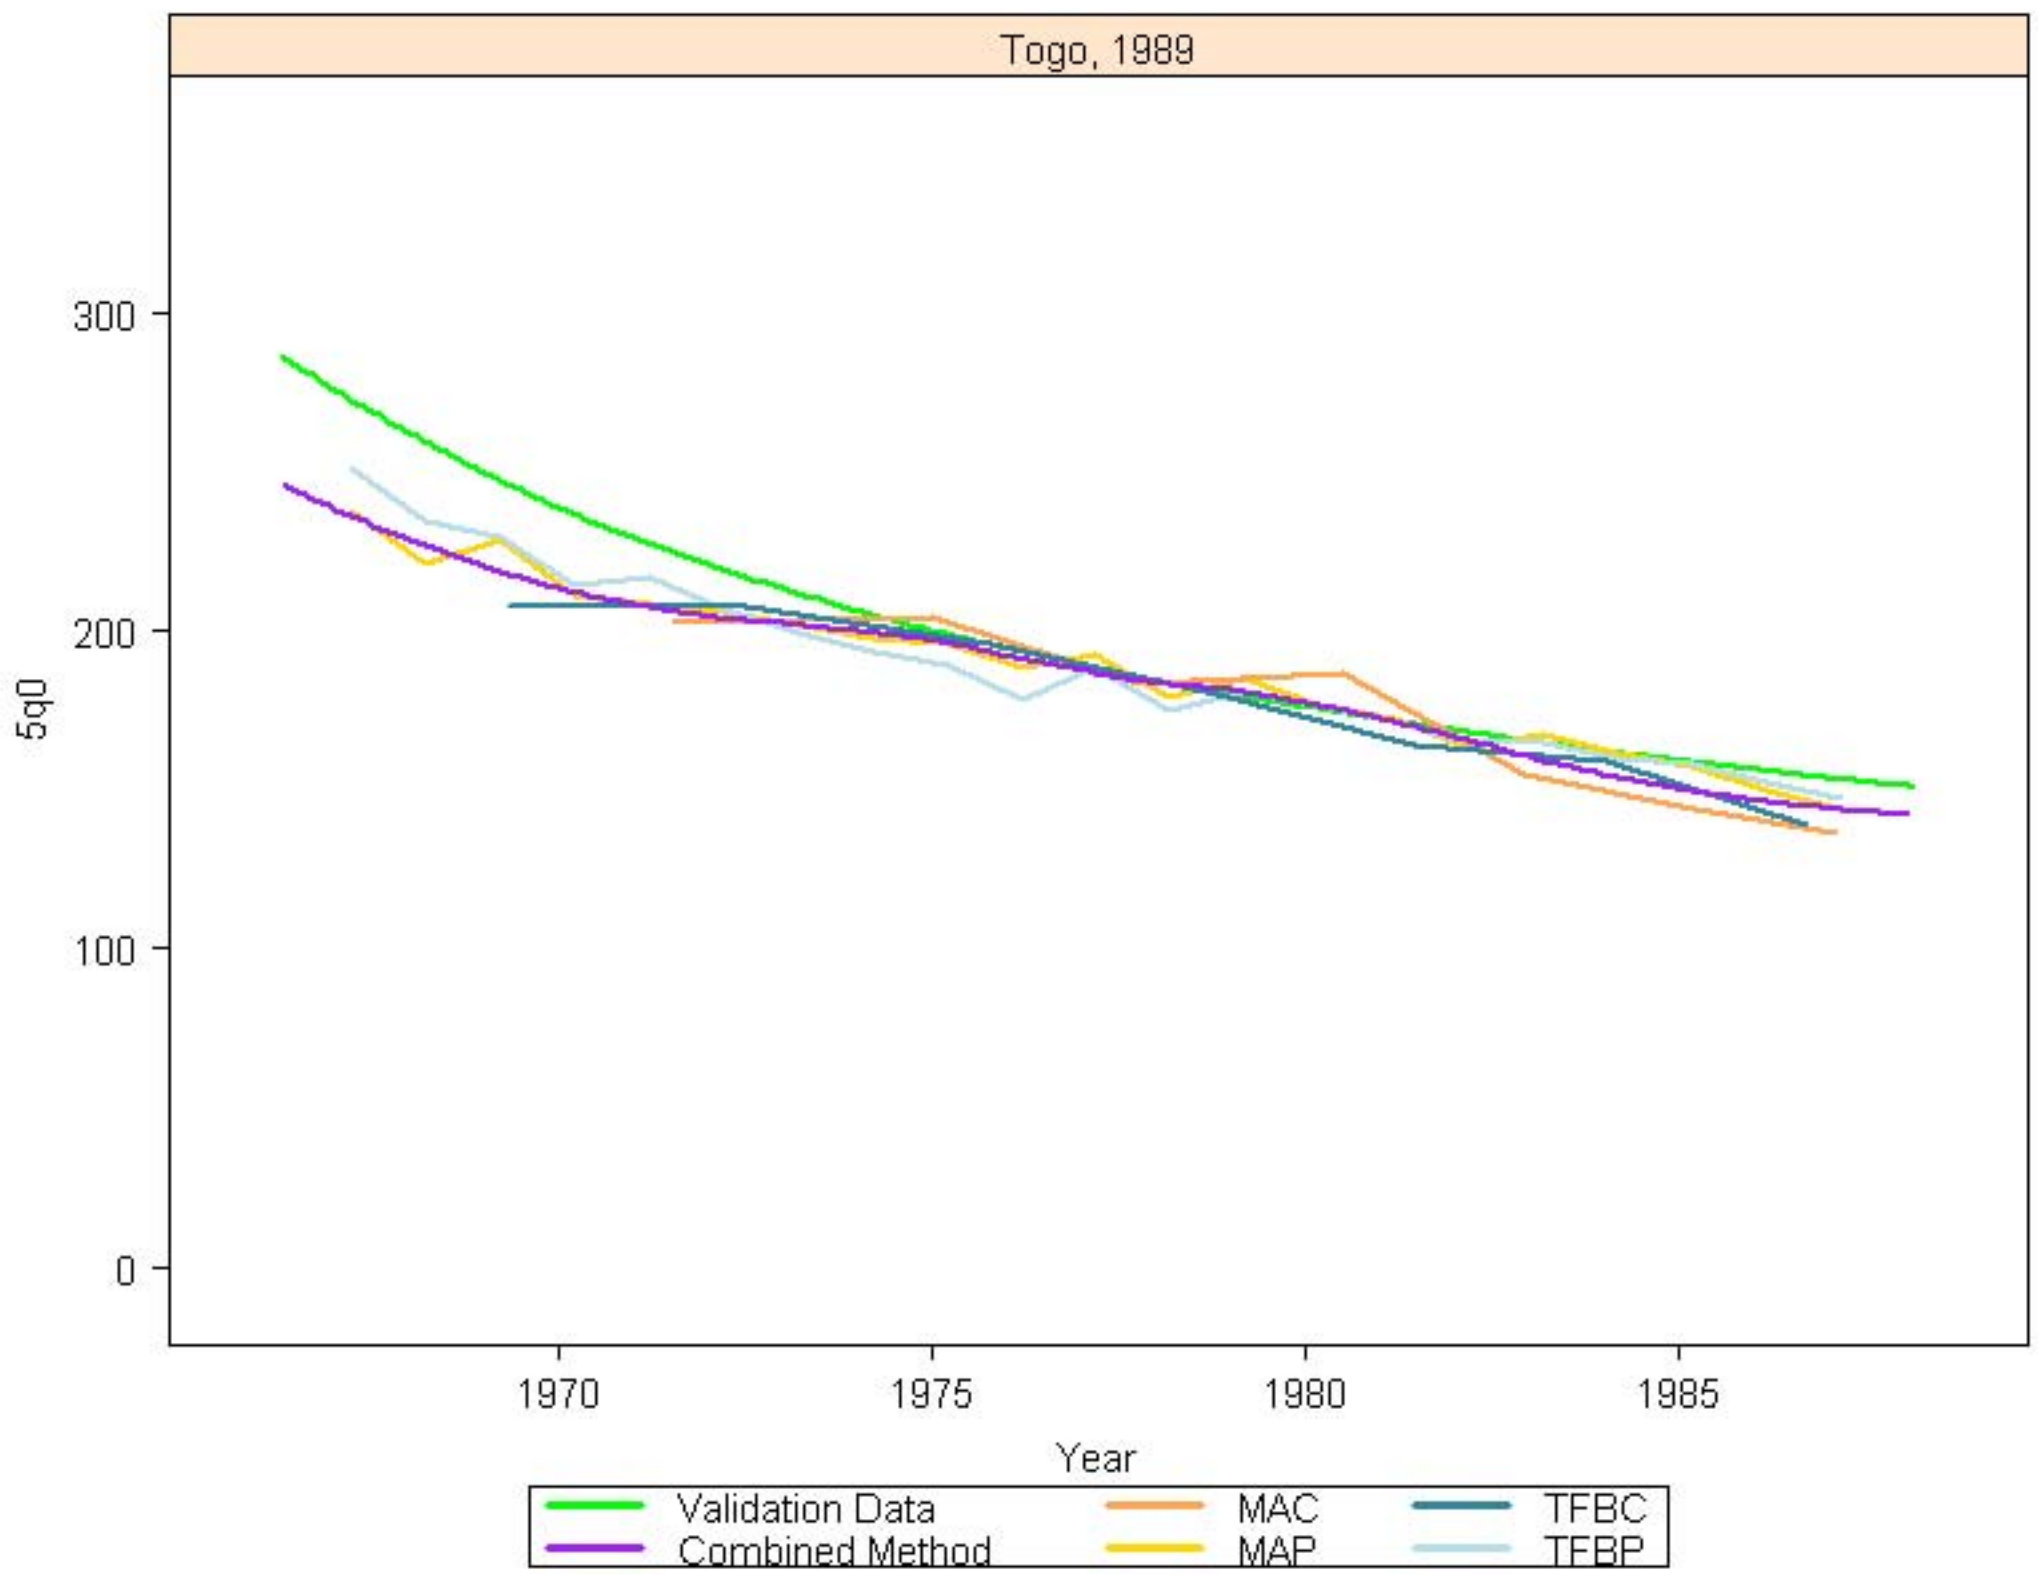

Togo, 1998

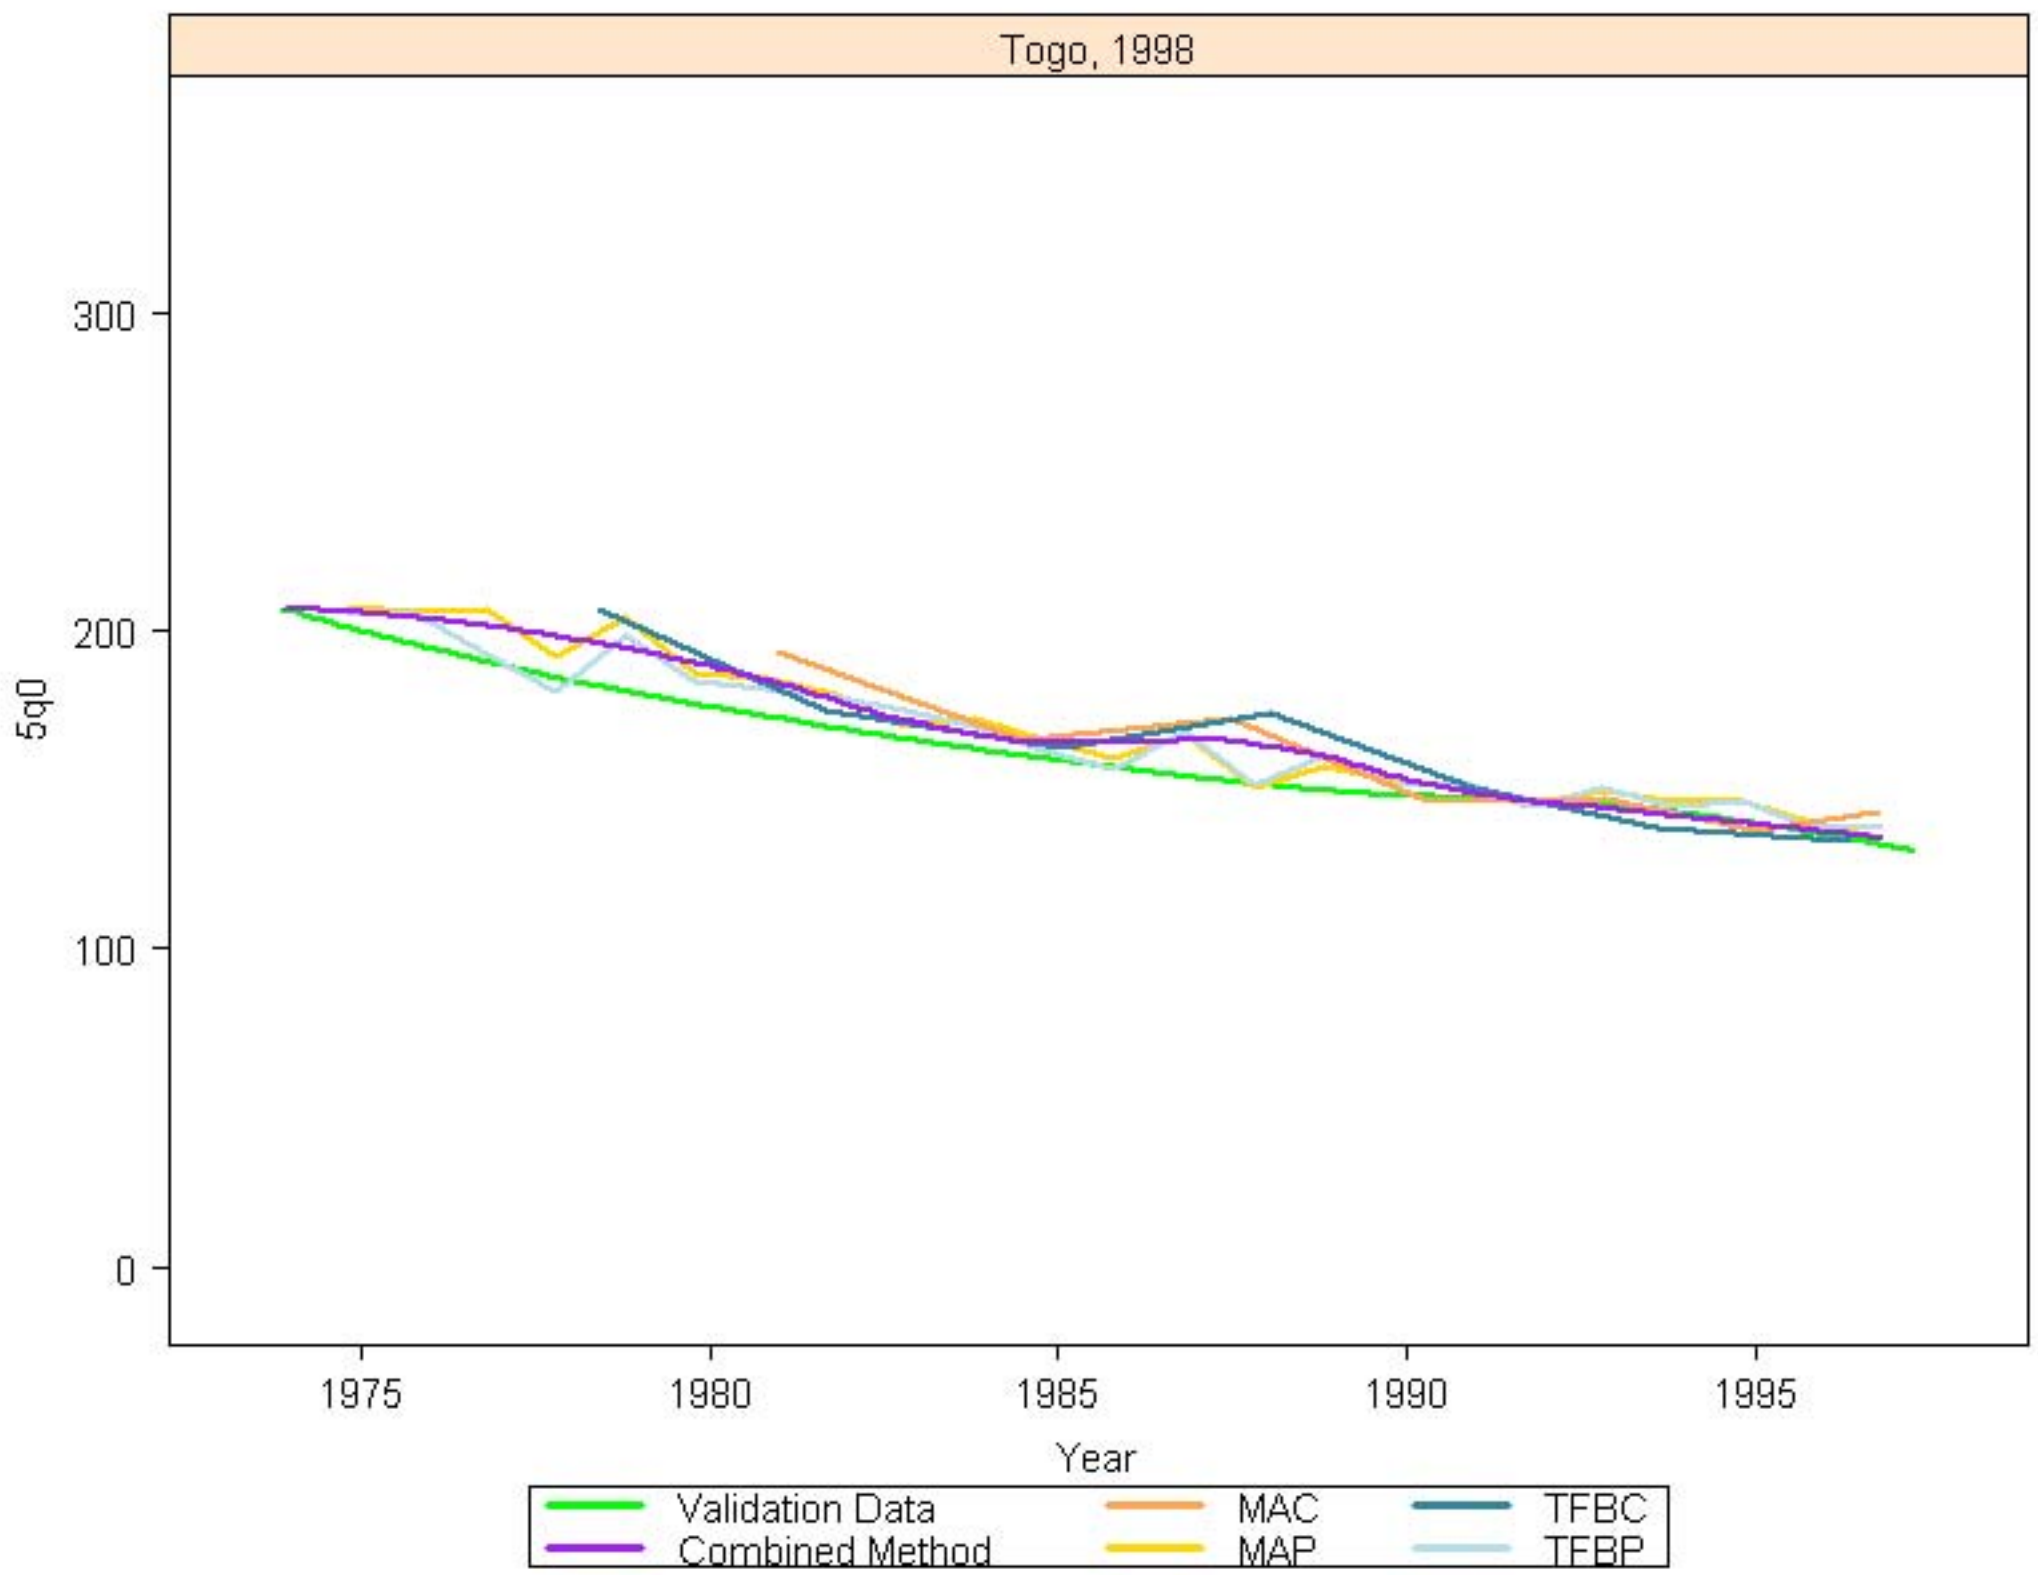

Trinidad and Tobago, 1988

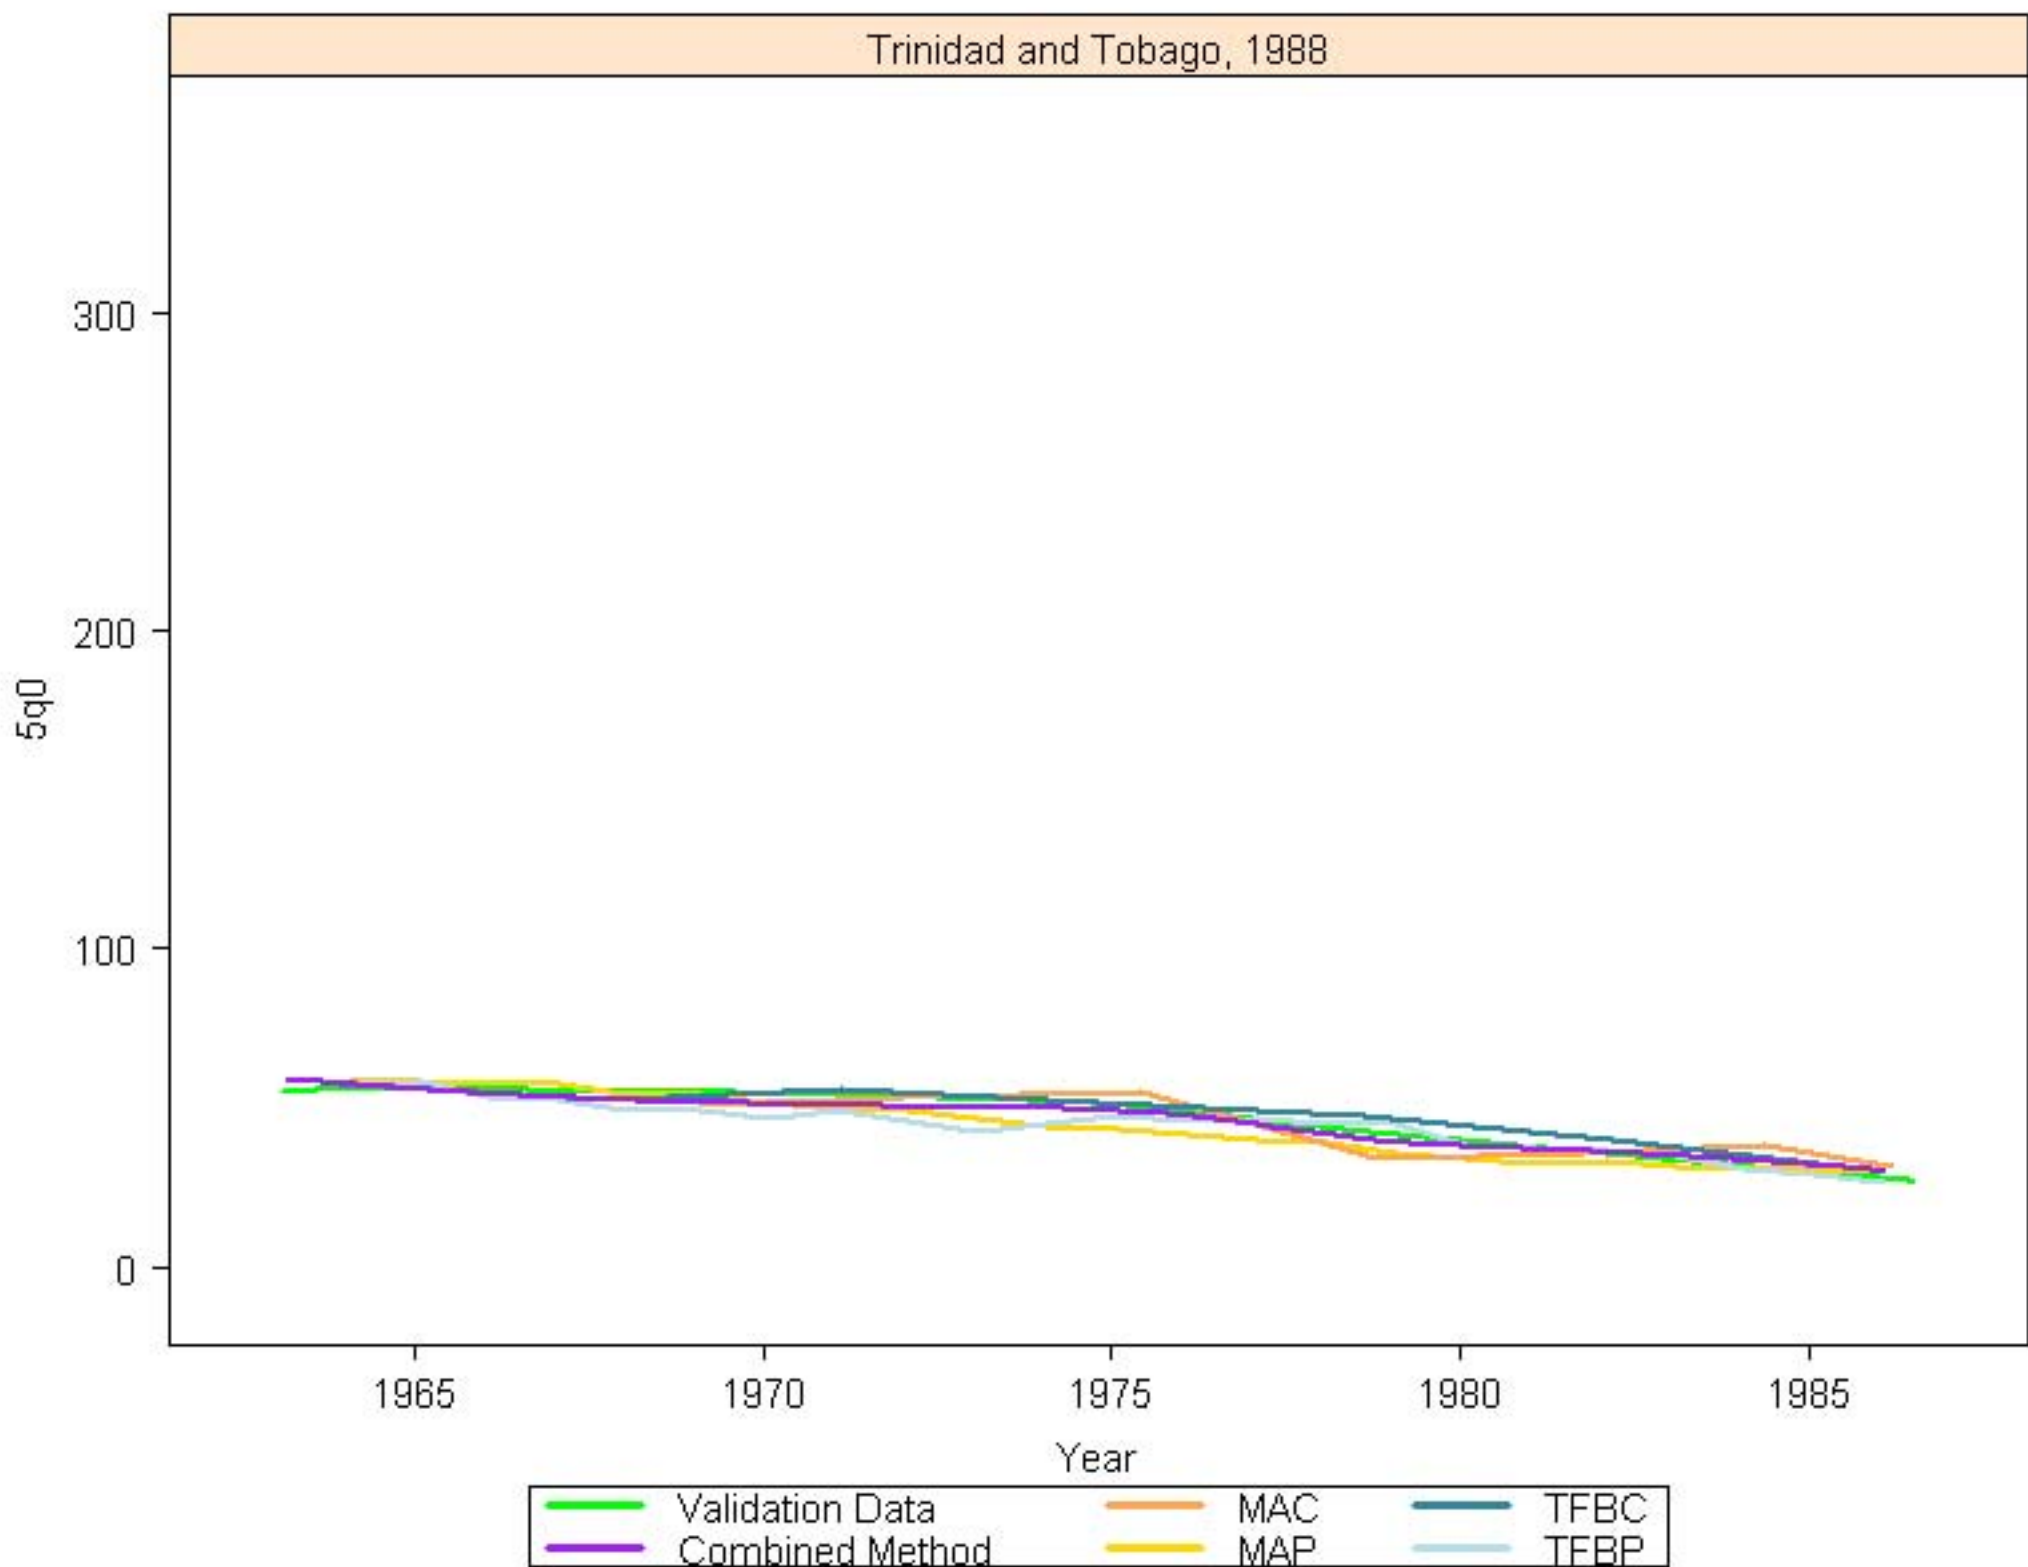

Tunisia, 1989

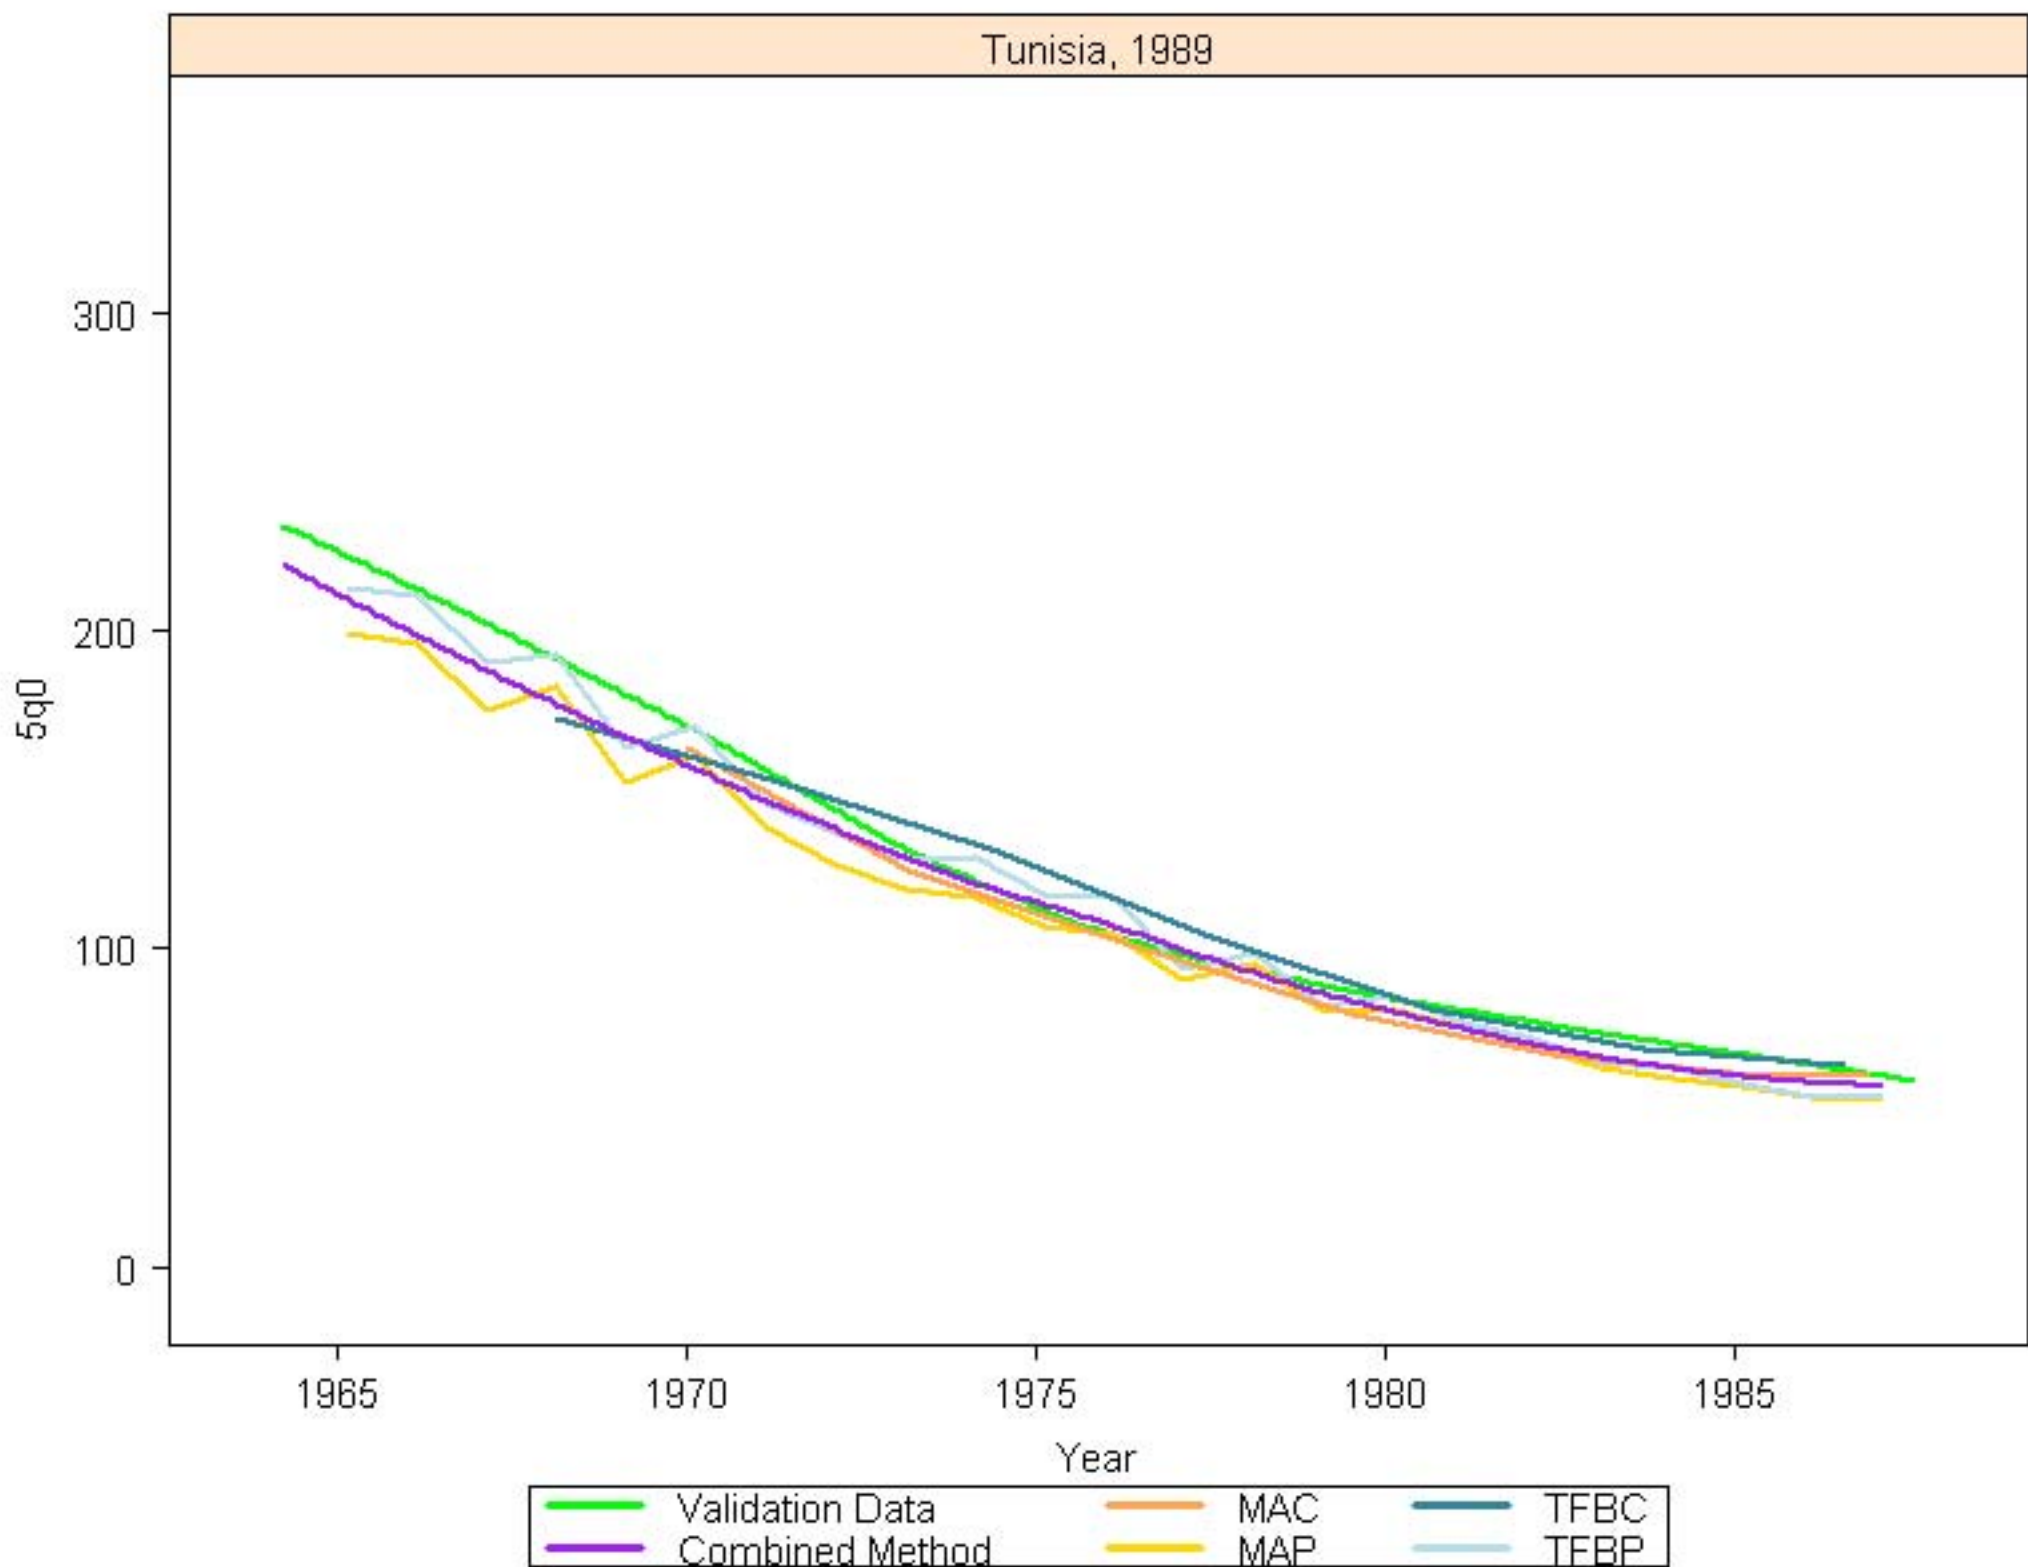

Turkey, 1994

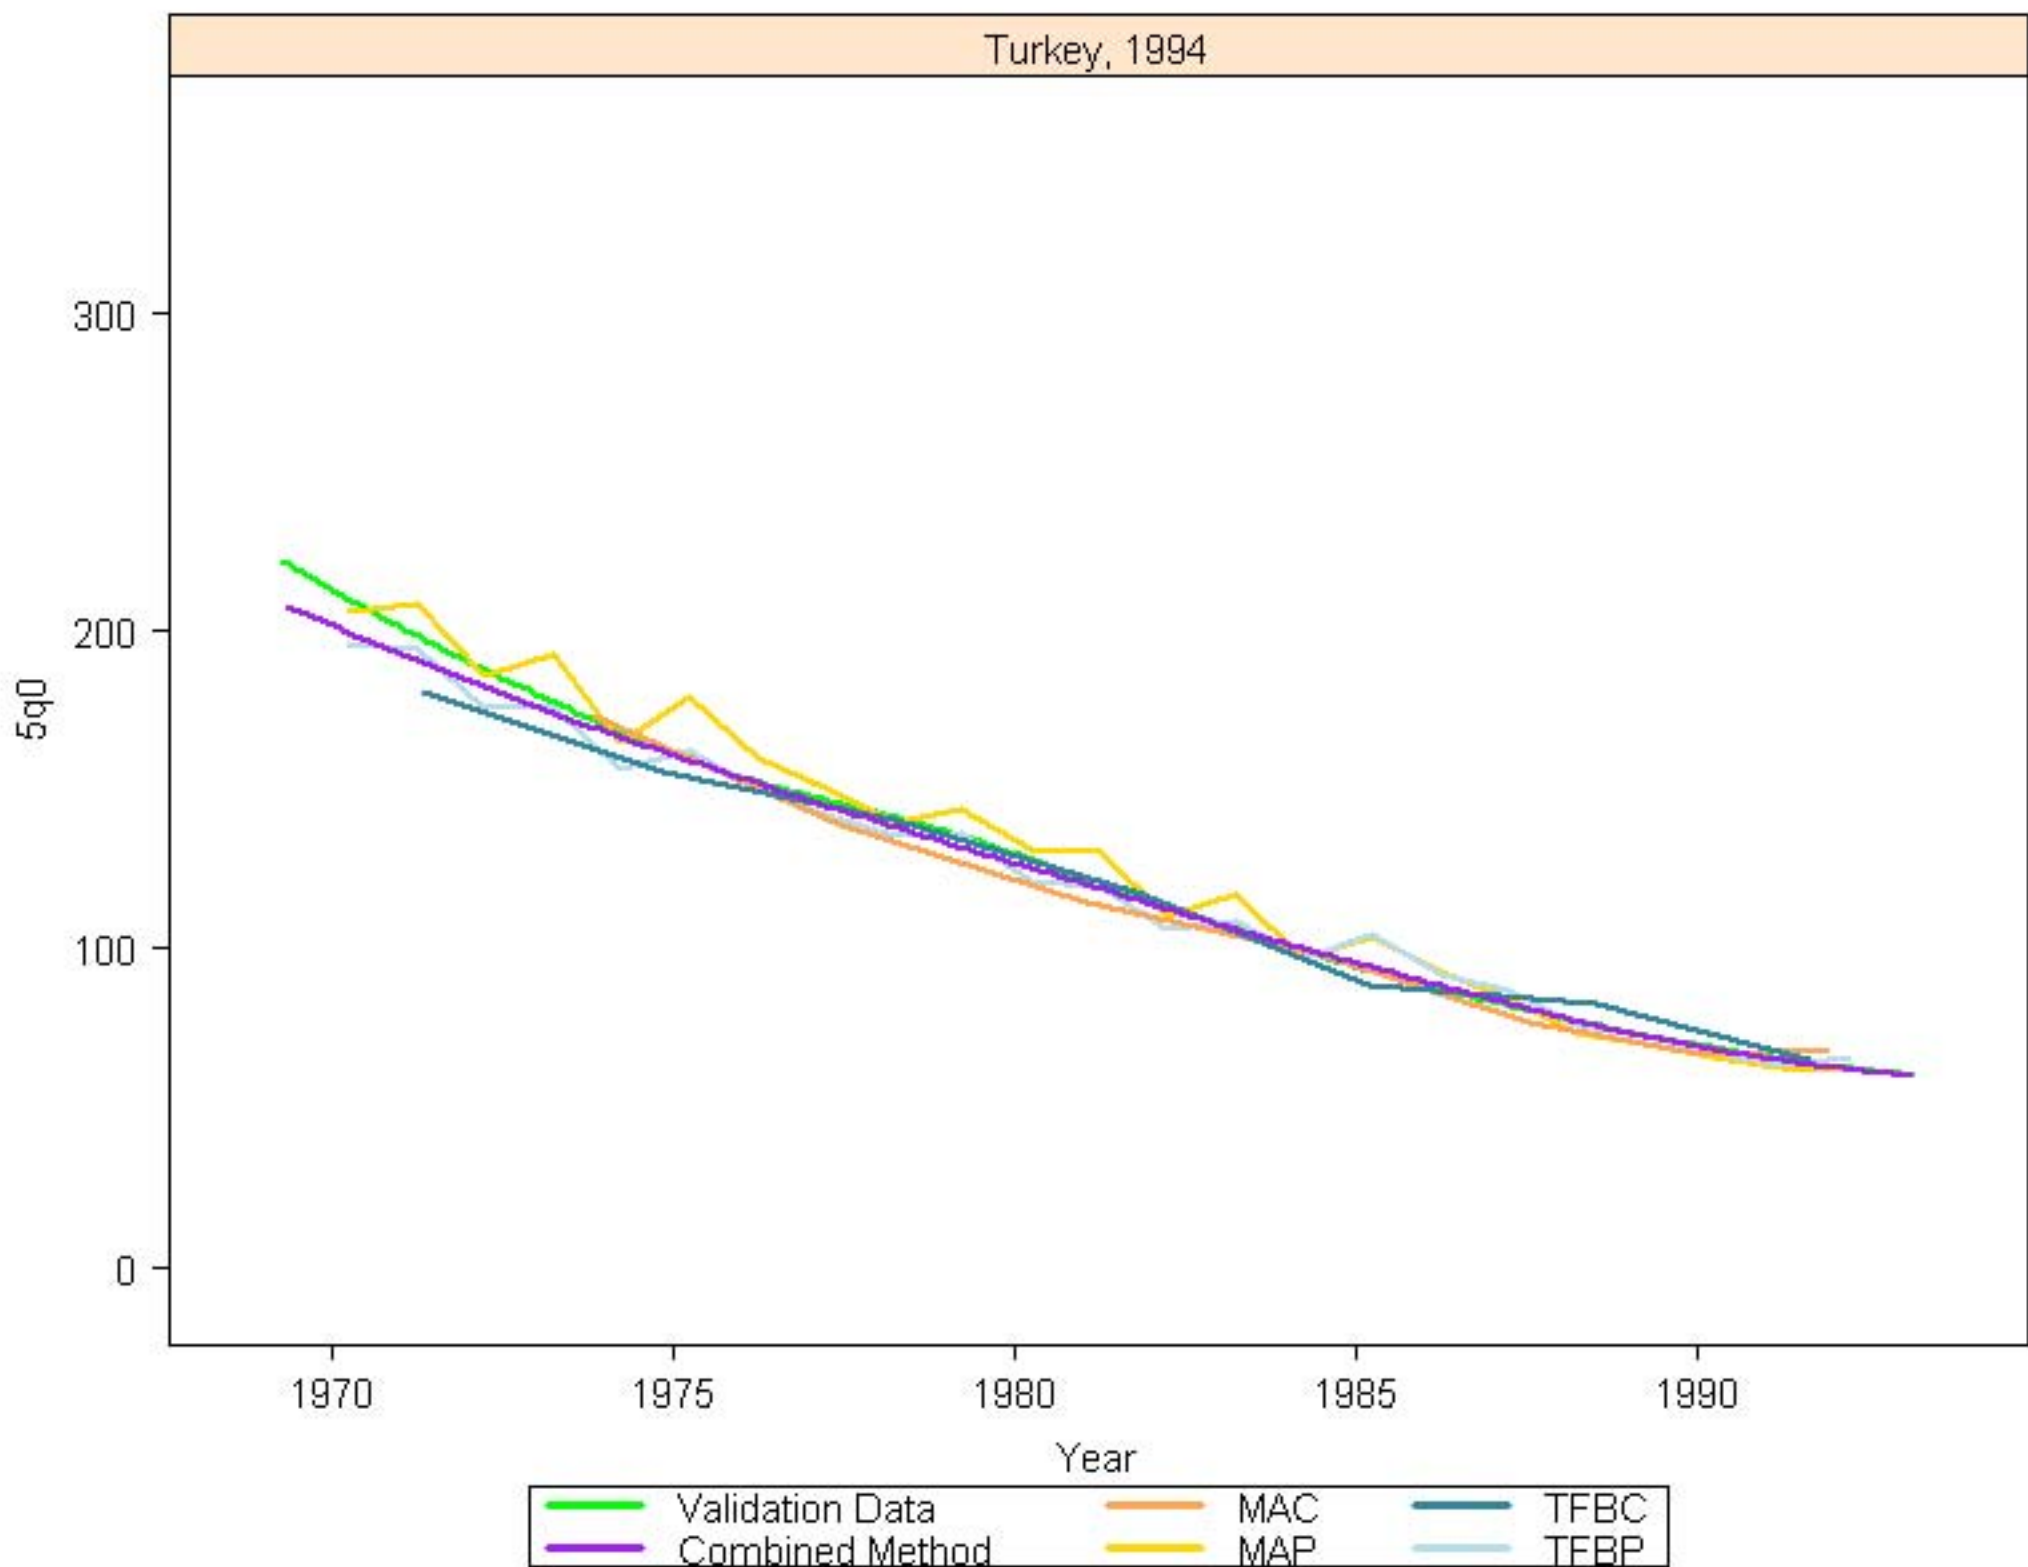

Turkey, 1999

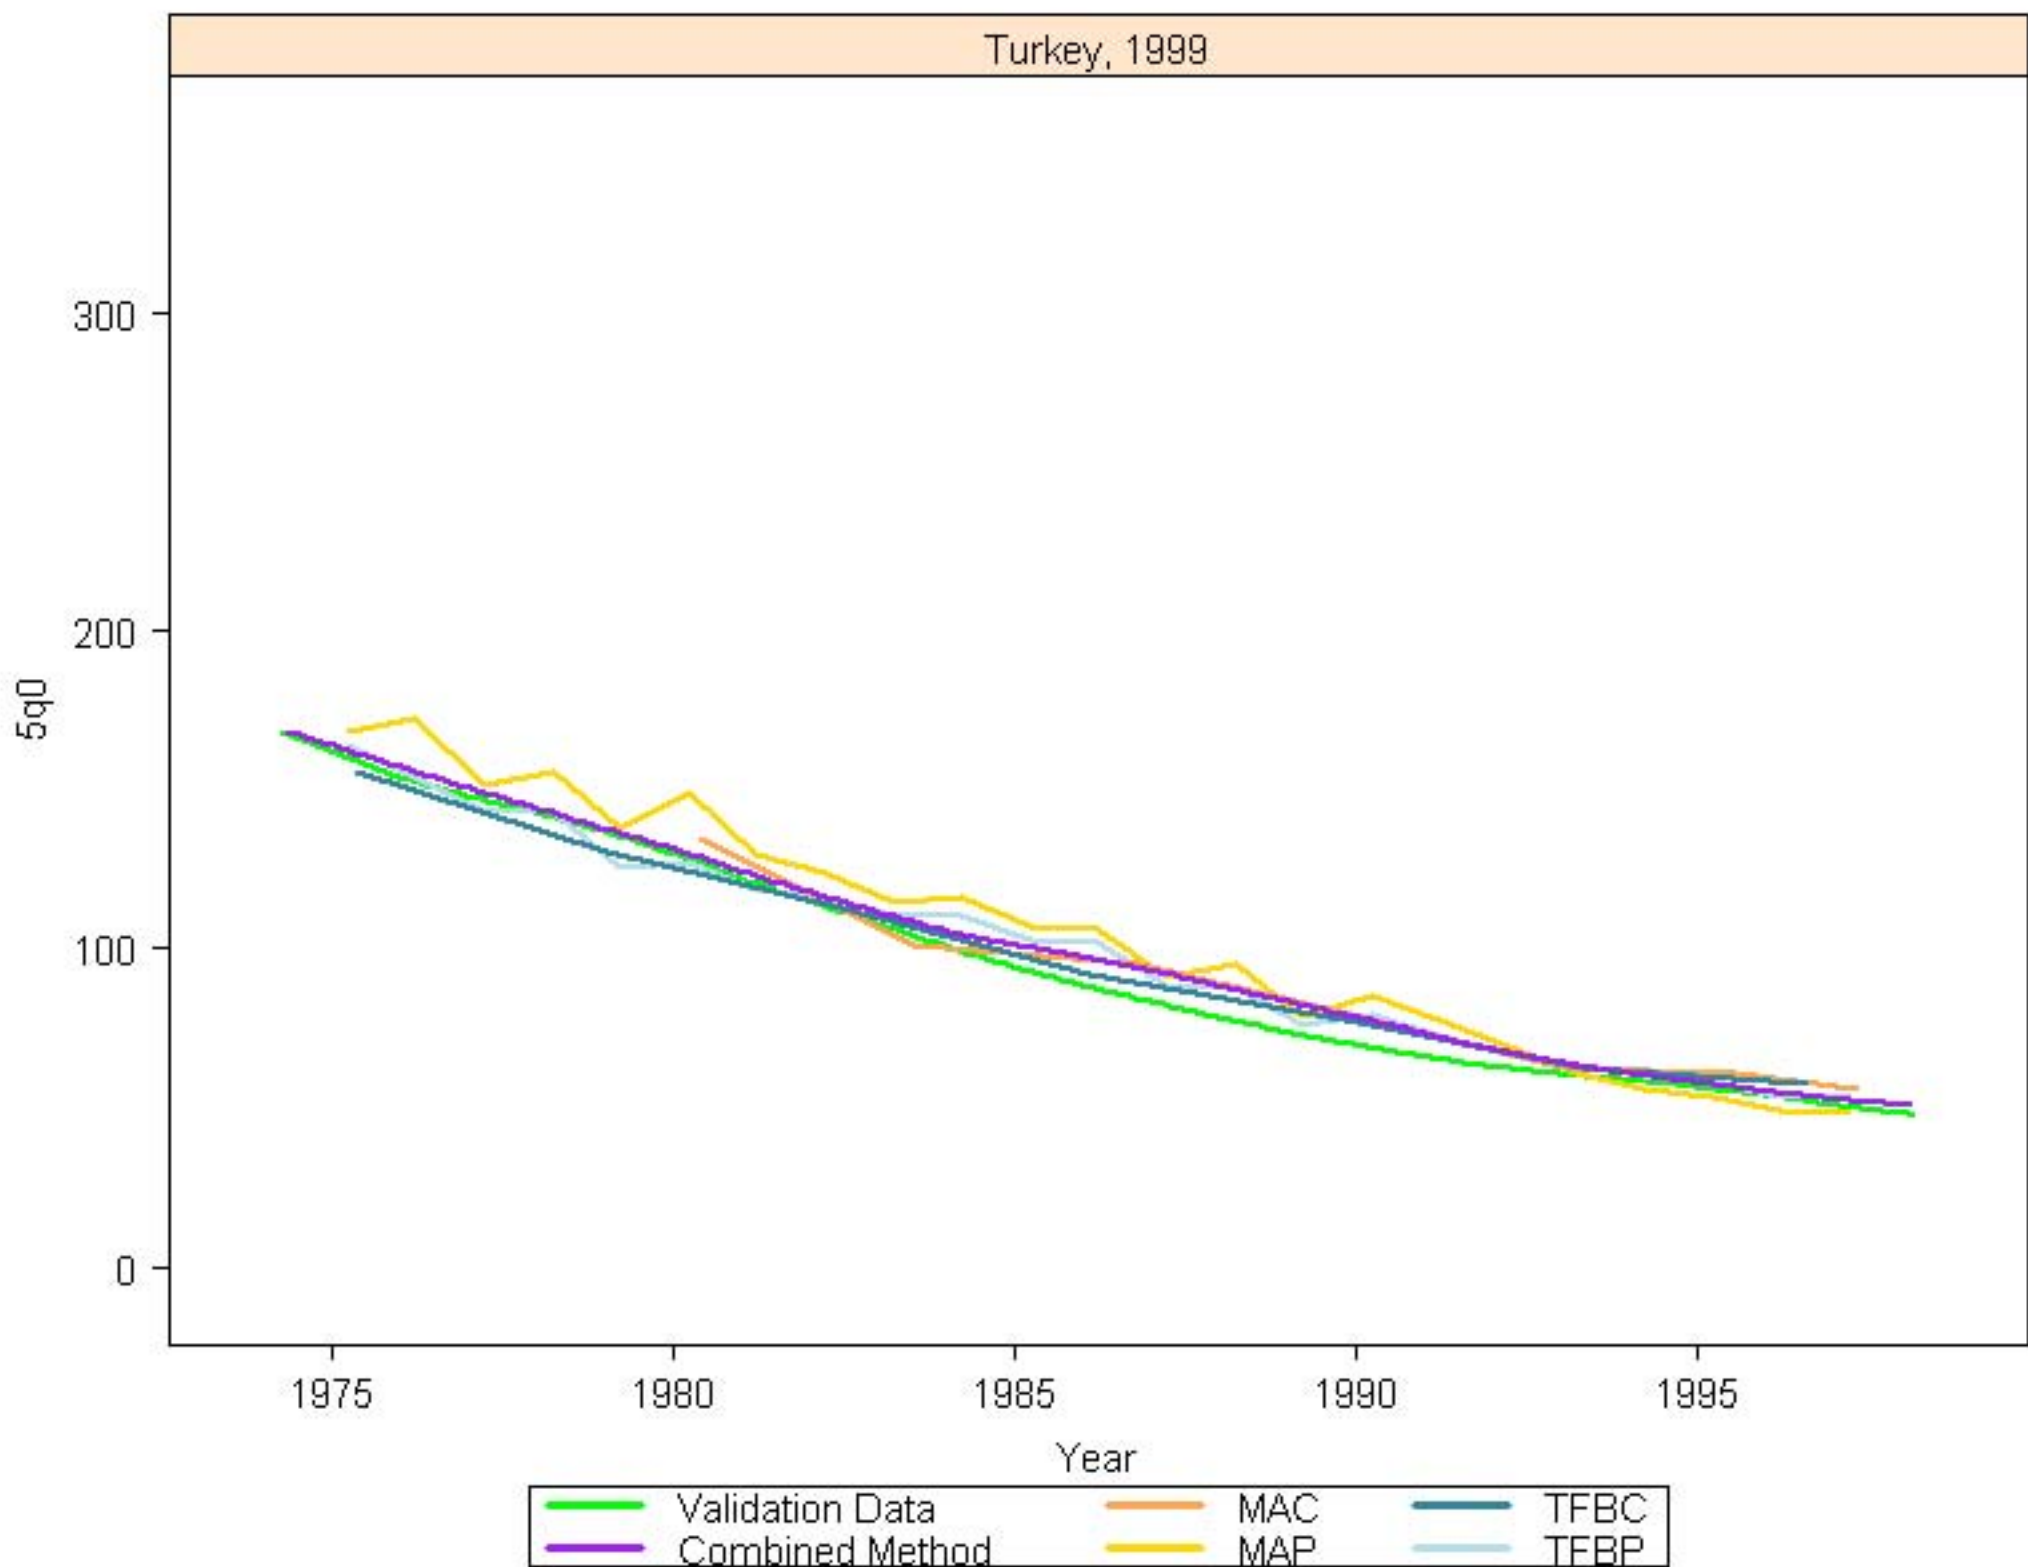

Turkey, 2004

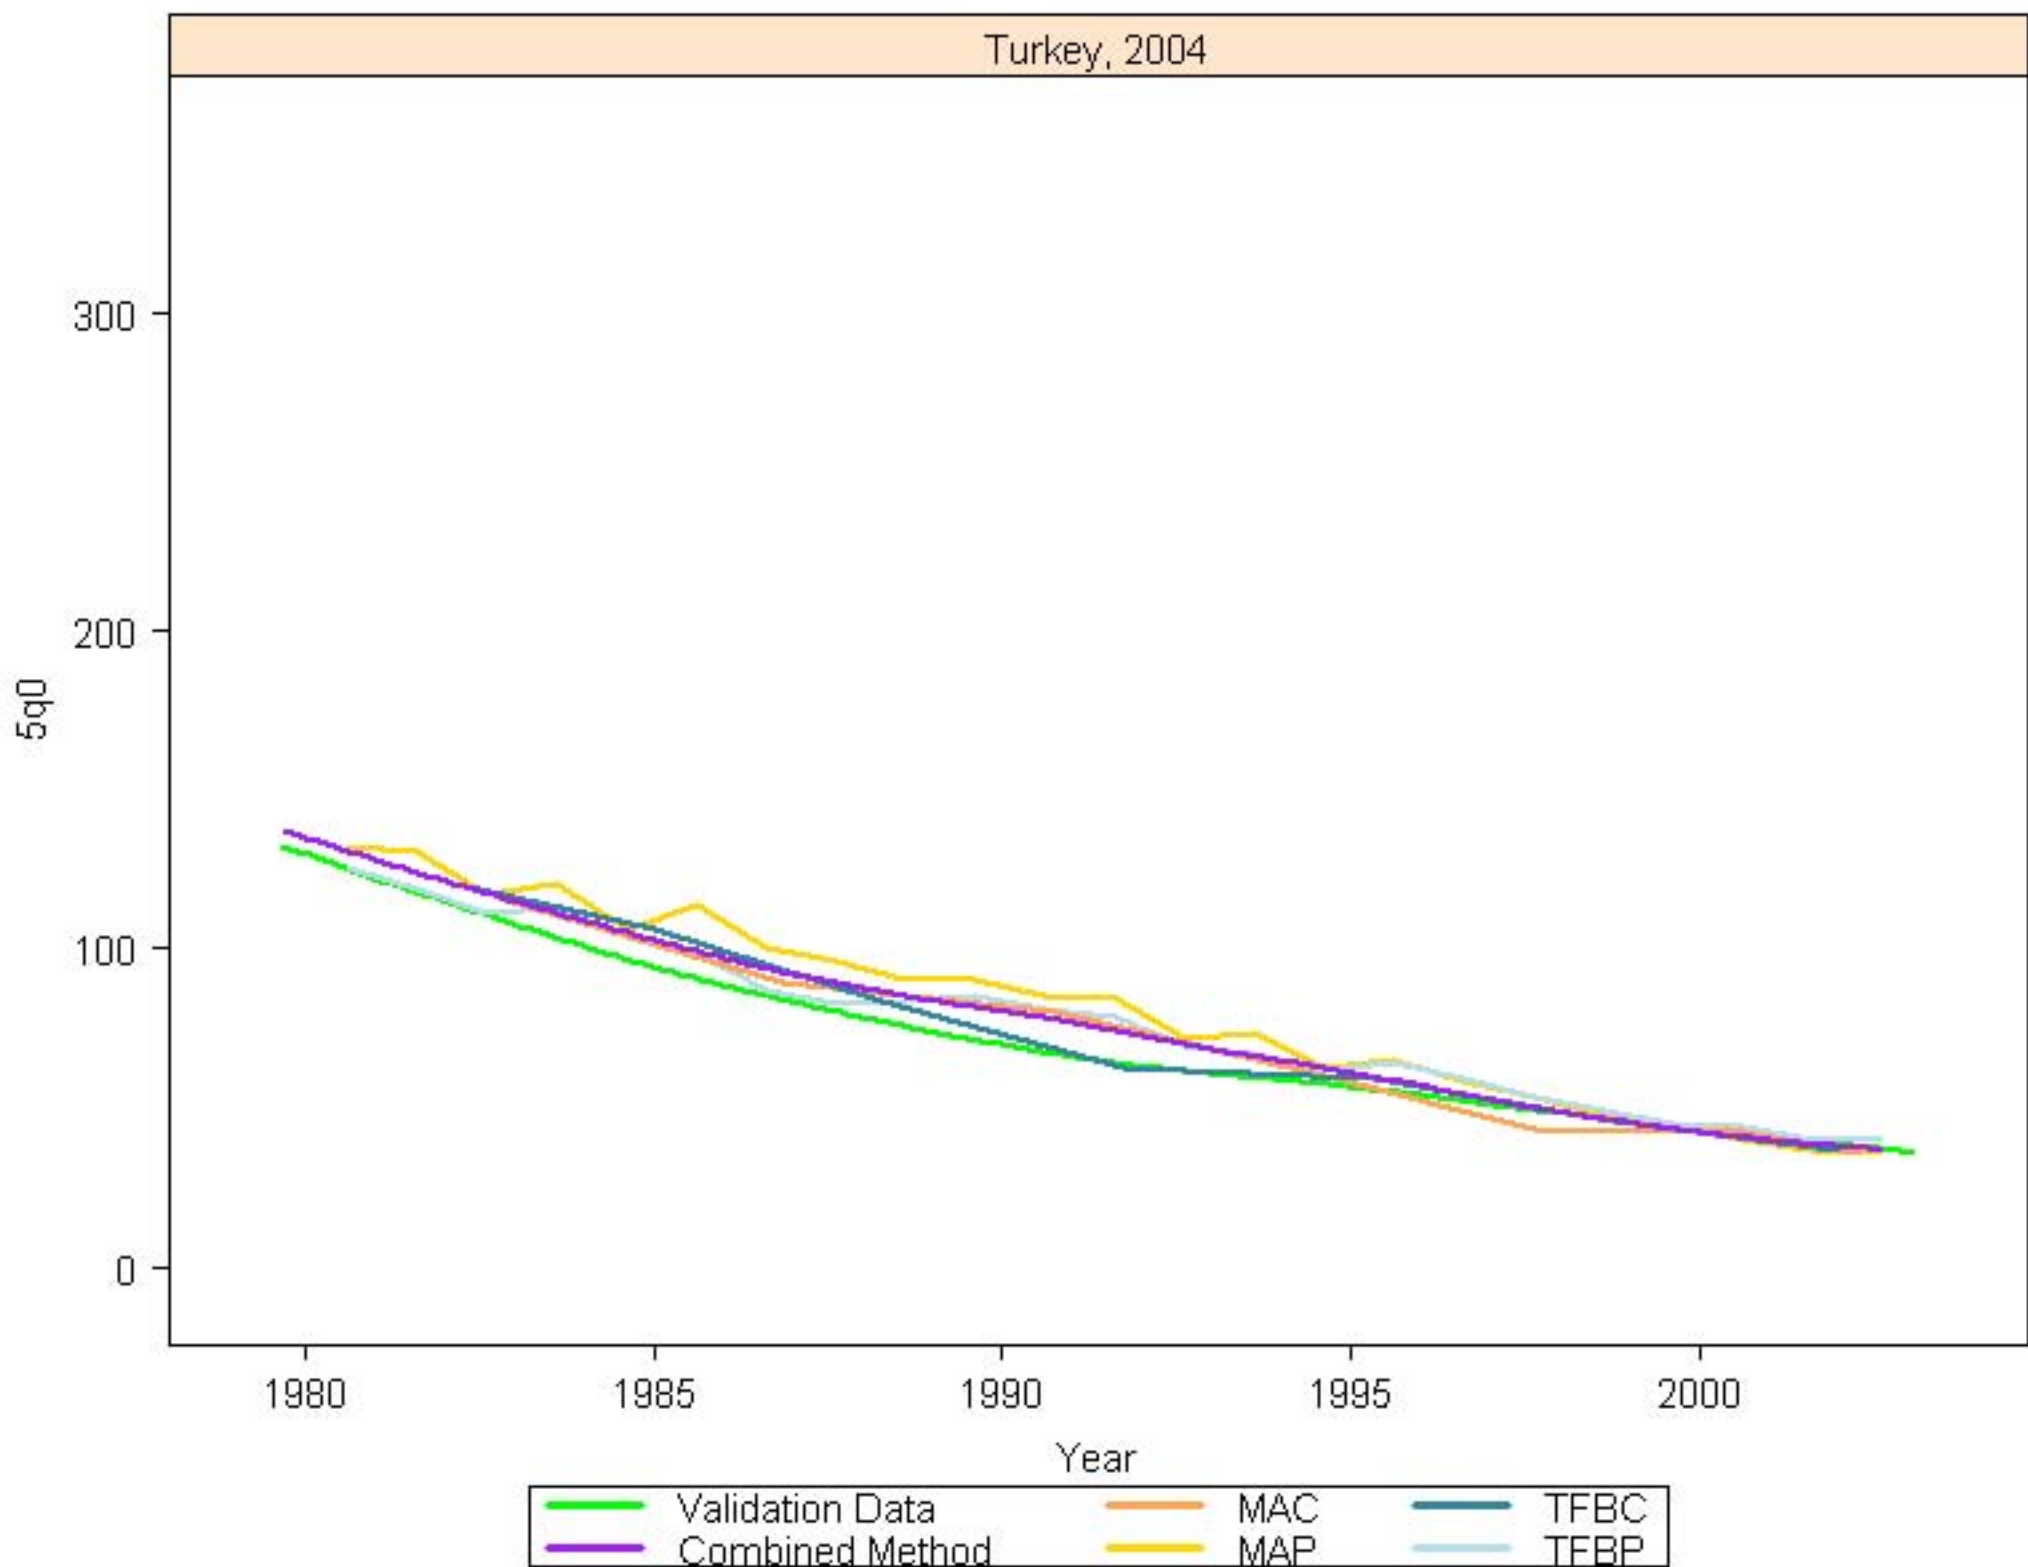

Uganda, 1989

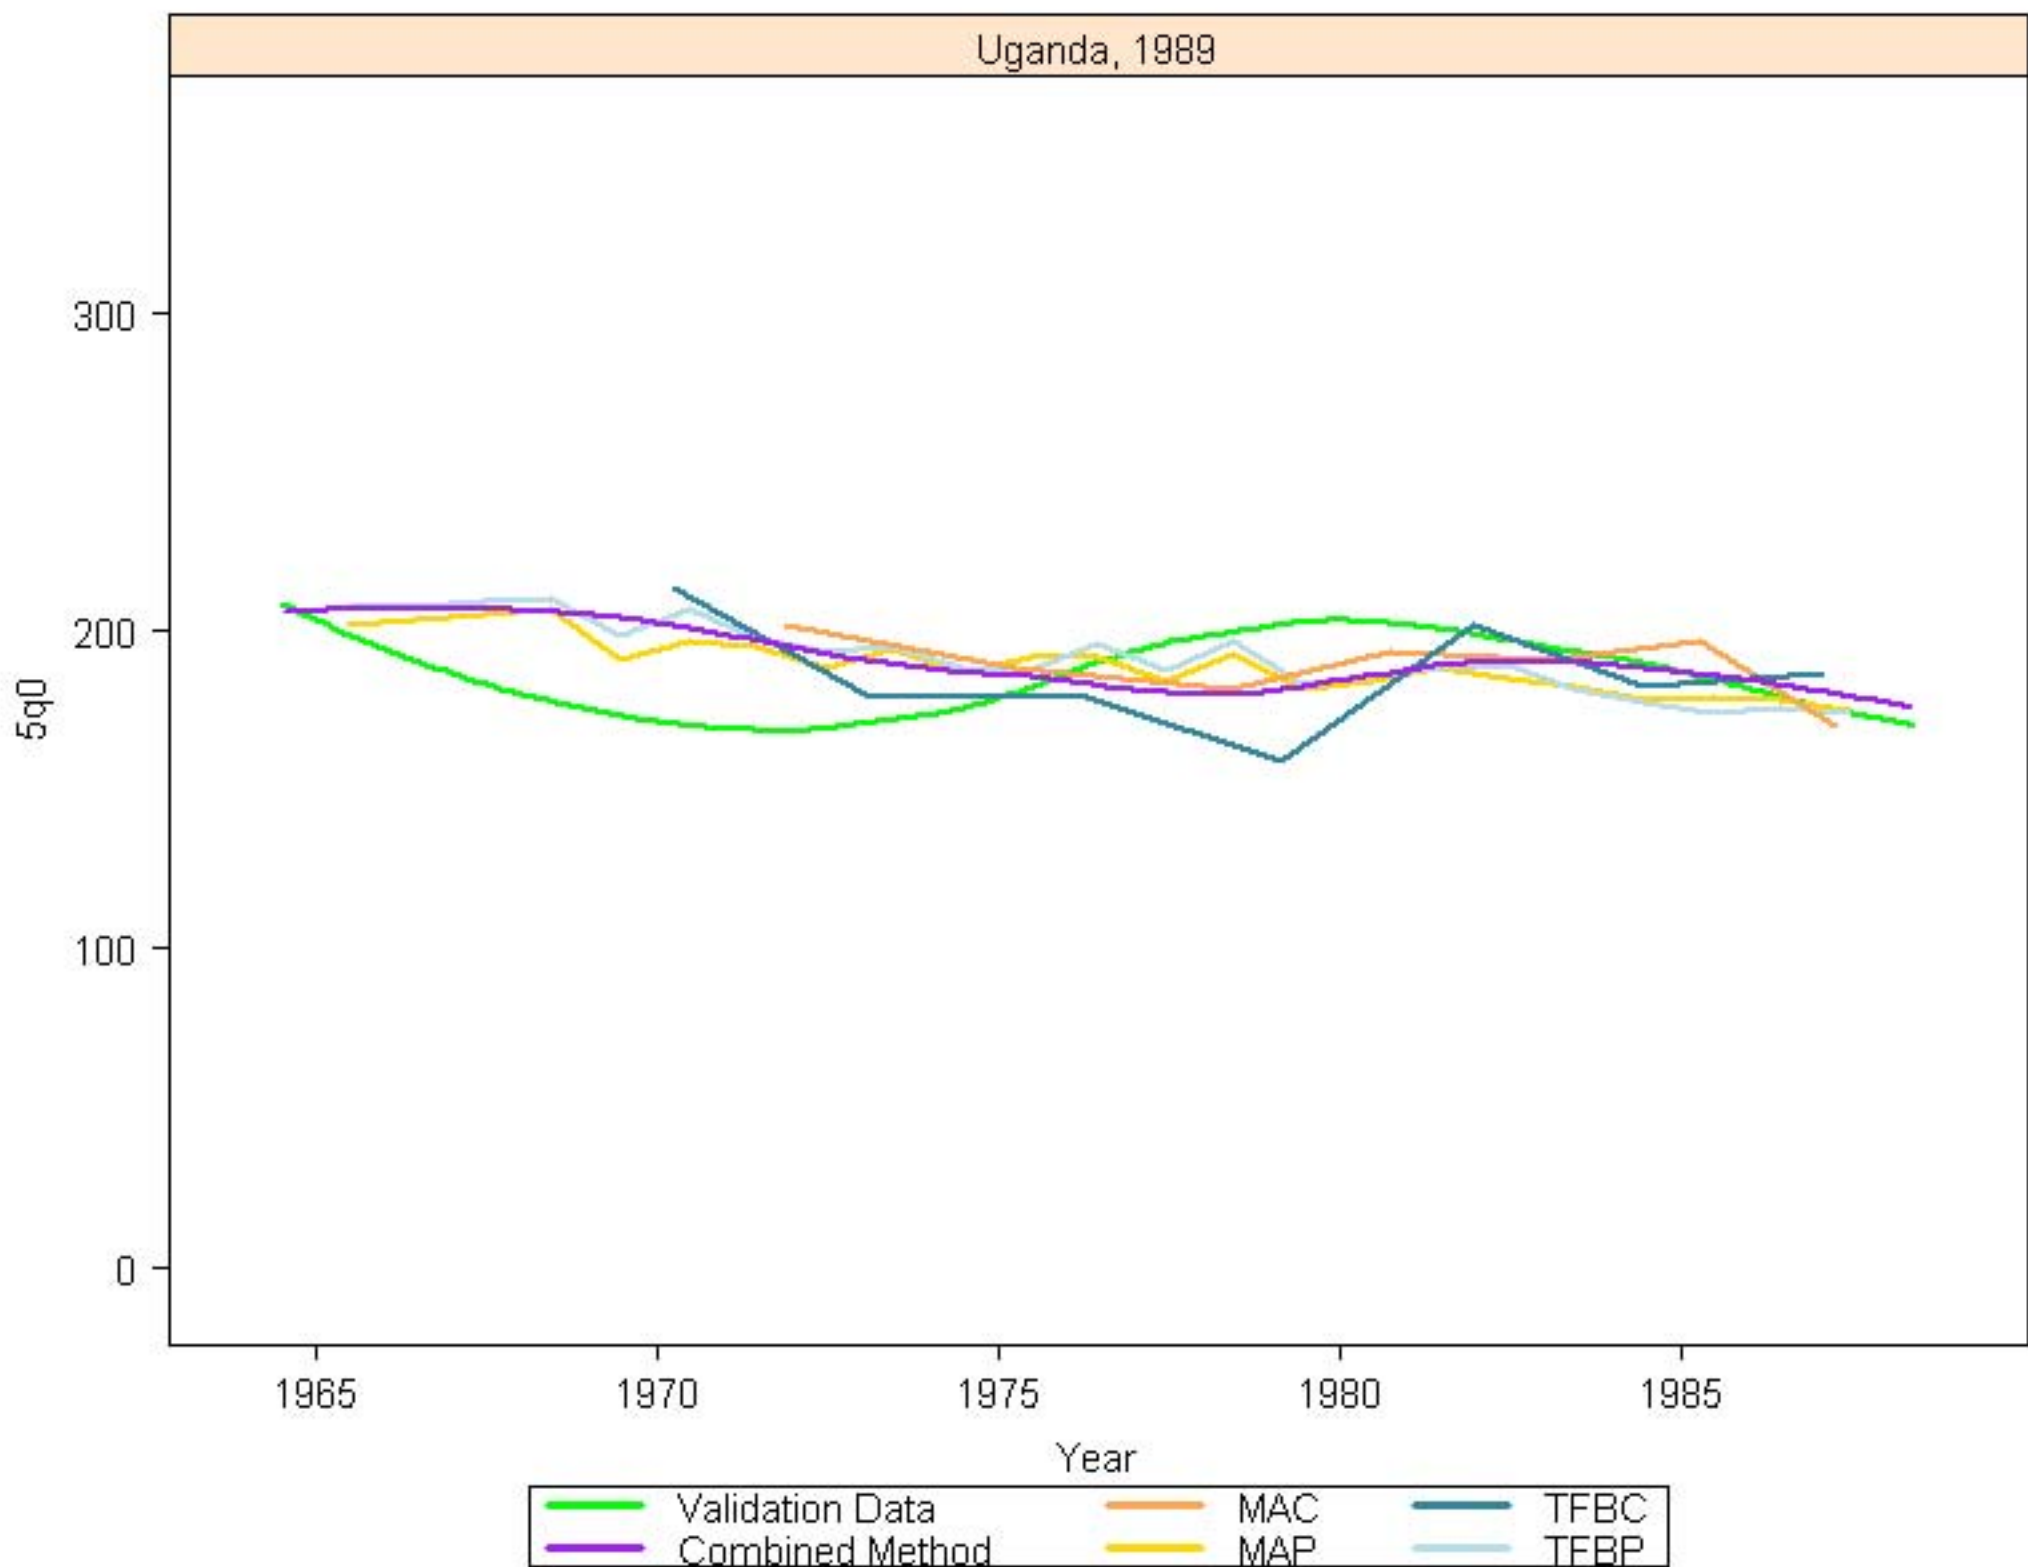



Uganda, 1995

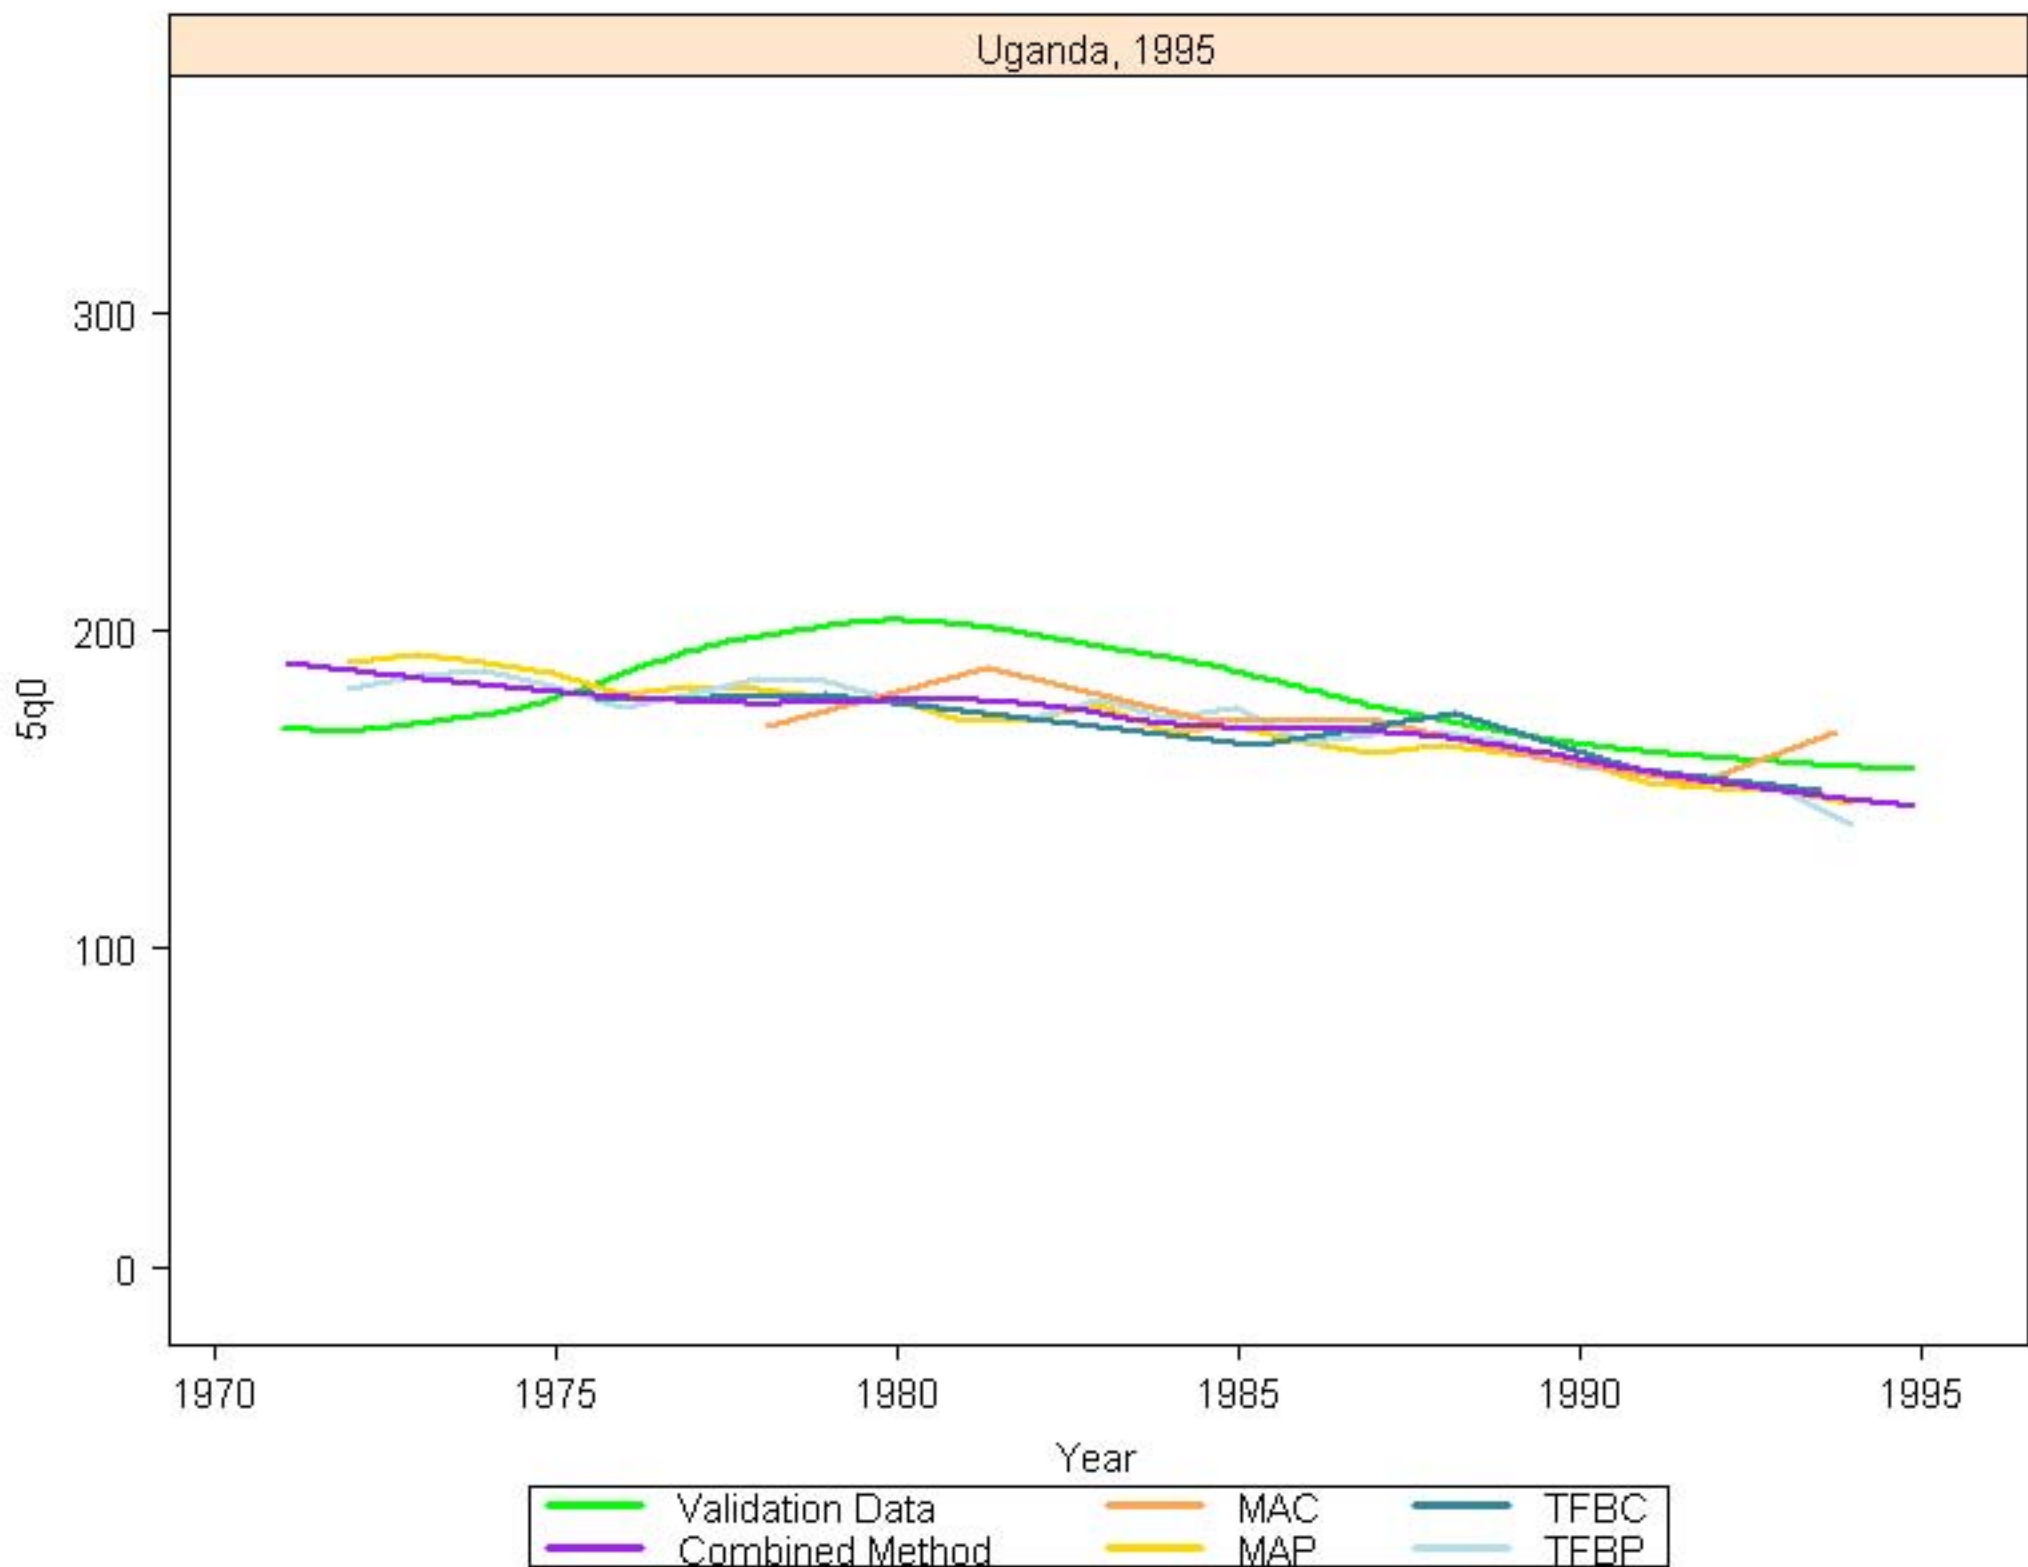

Uganda, 2001

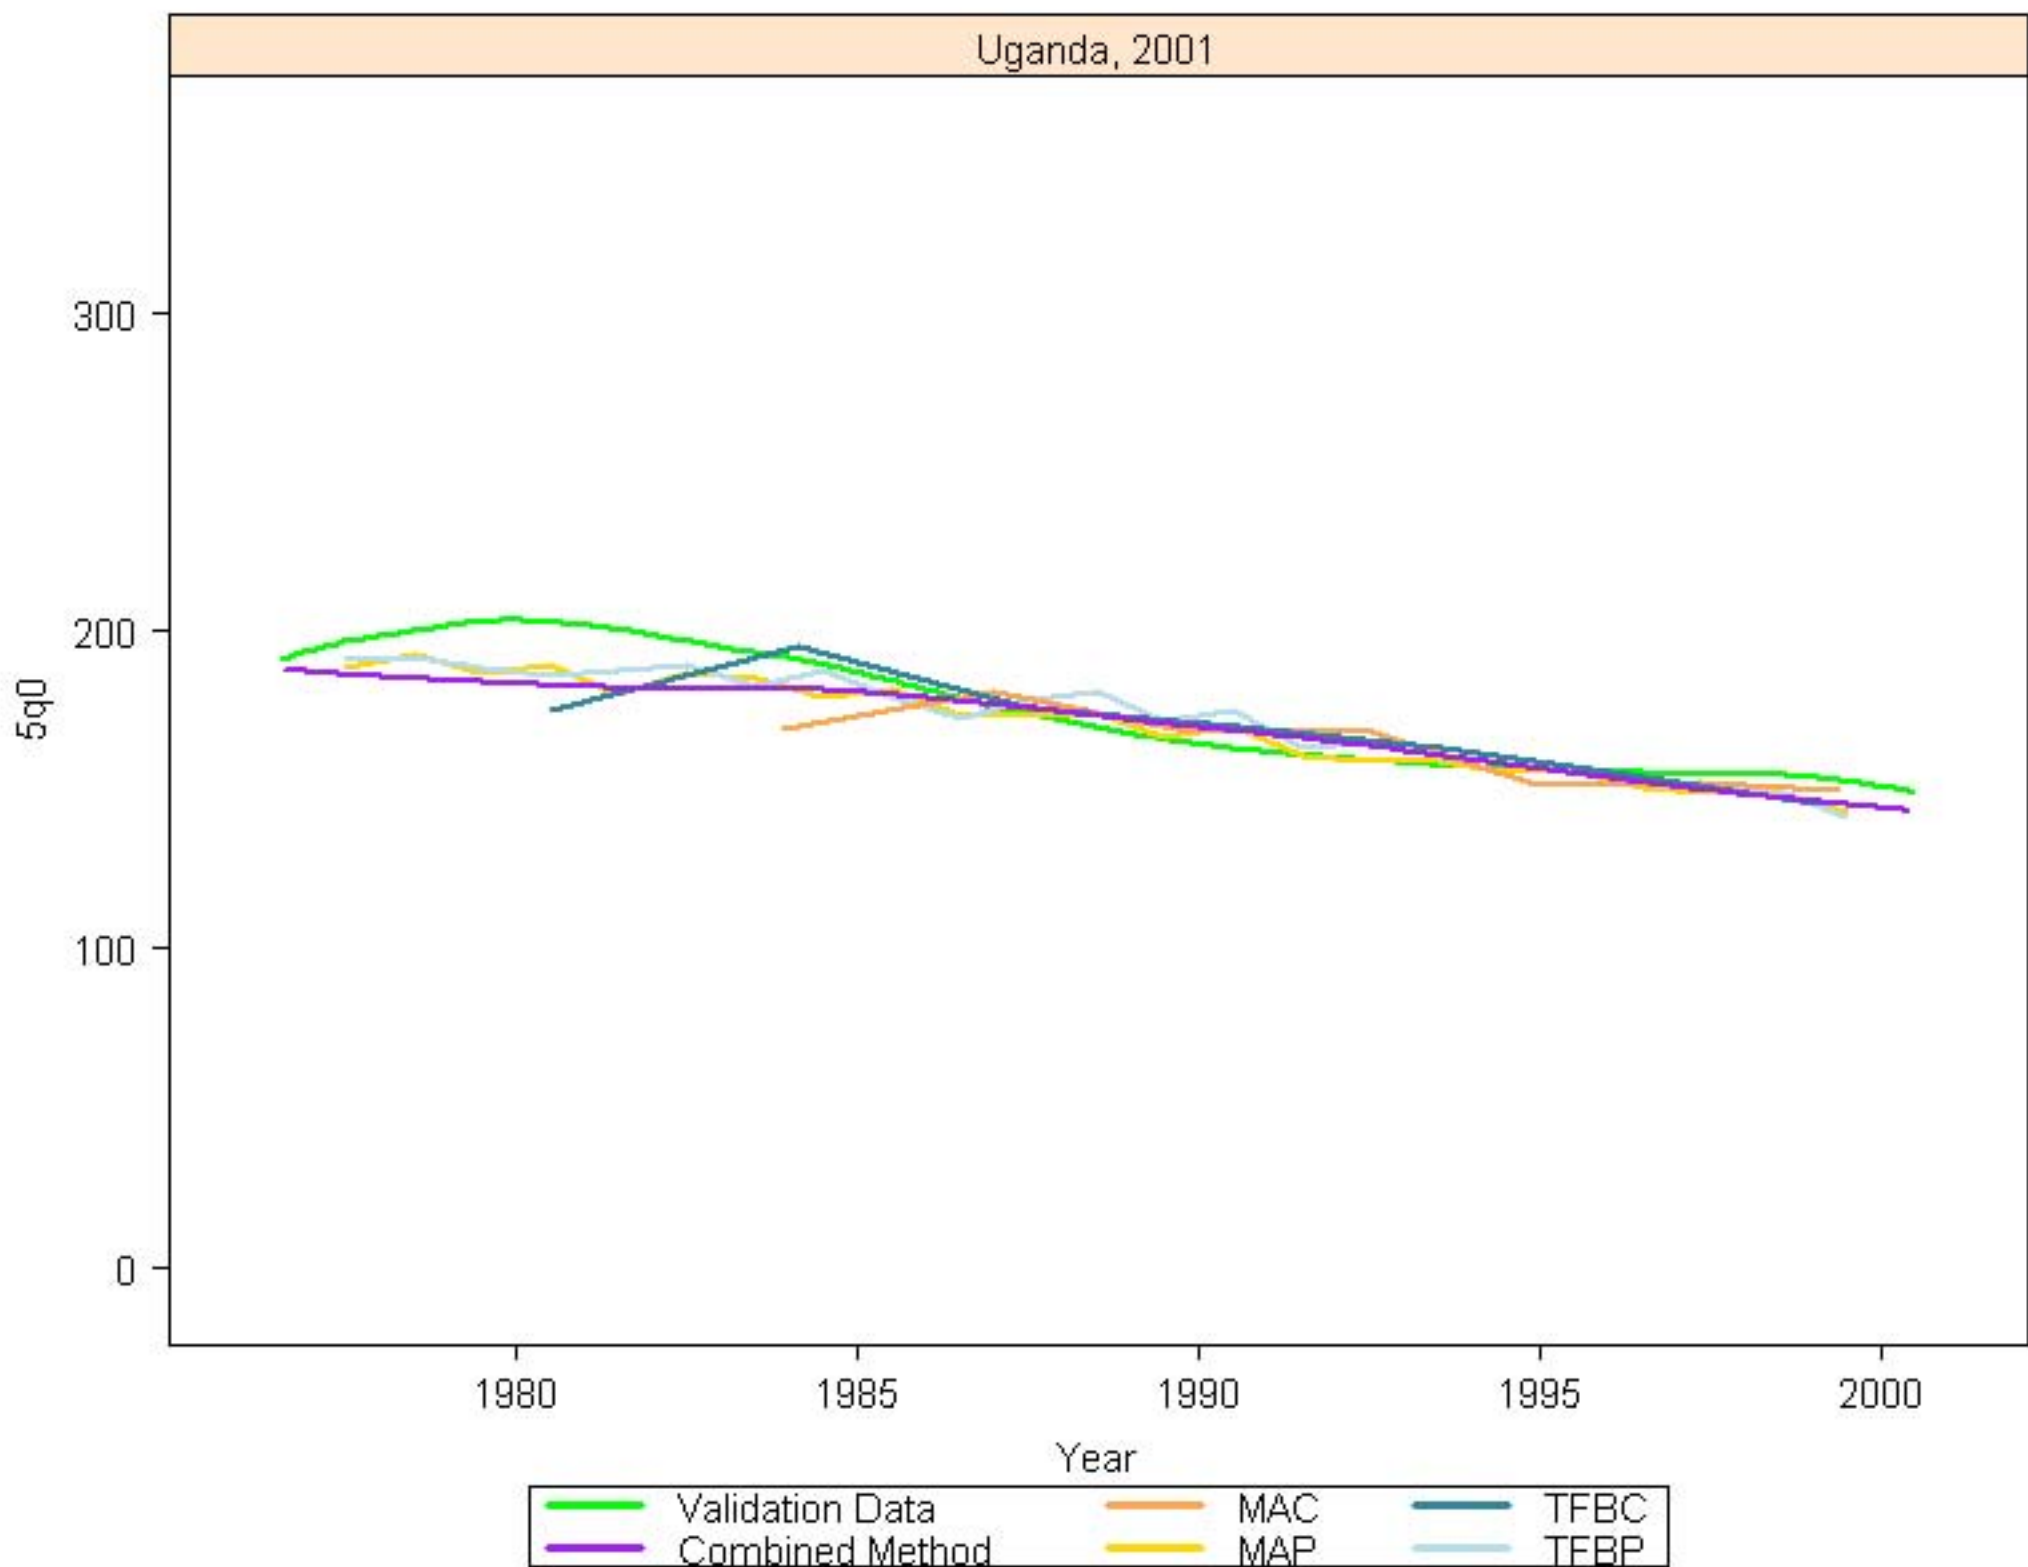

Uganda, 2007

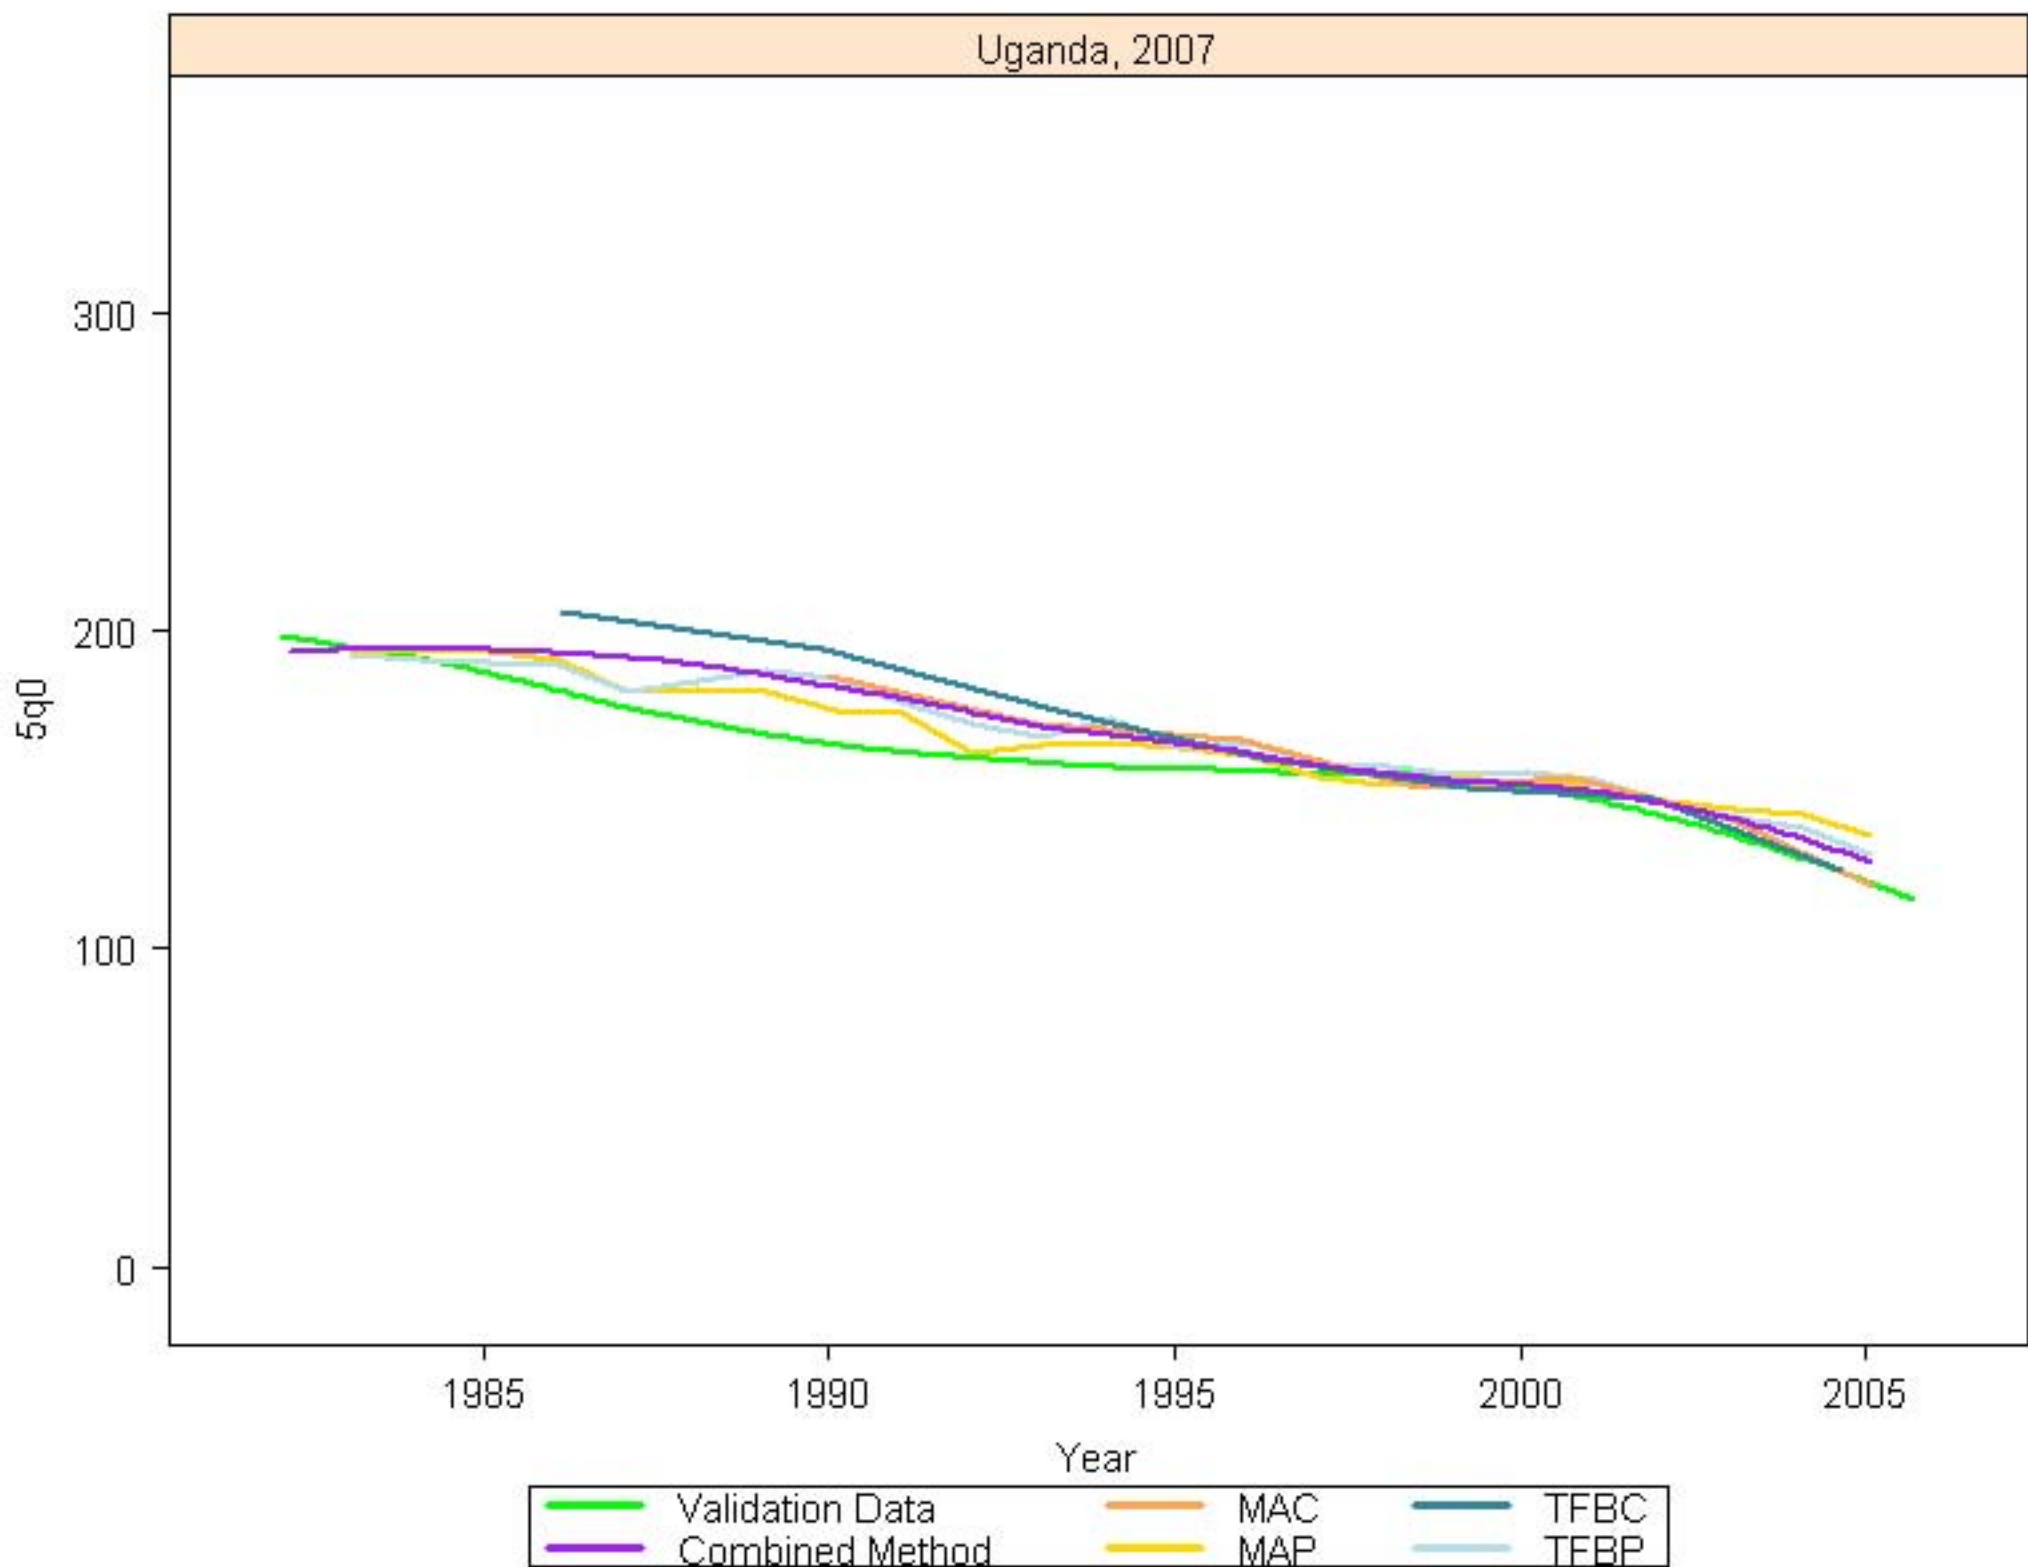

Uzbekistan, 1997

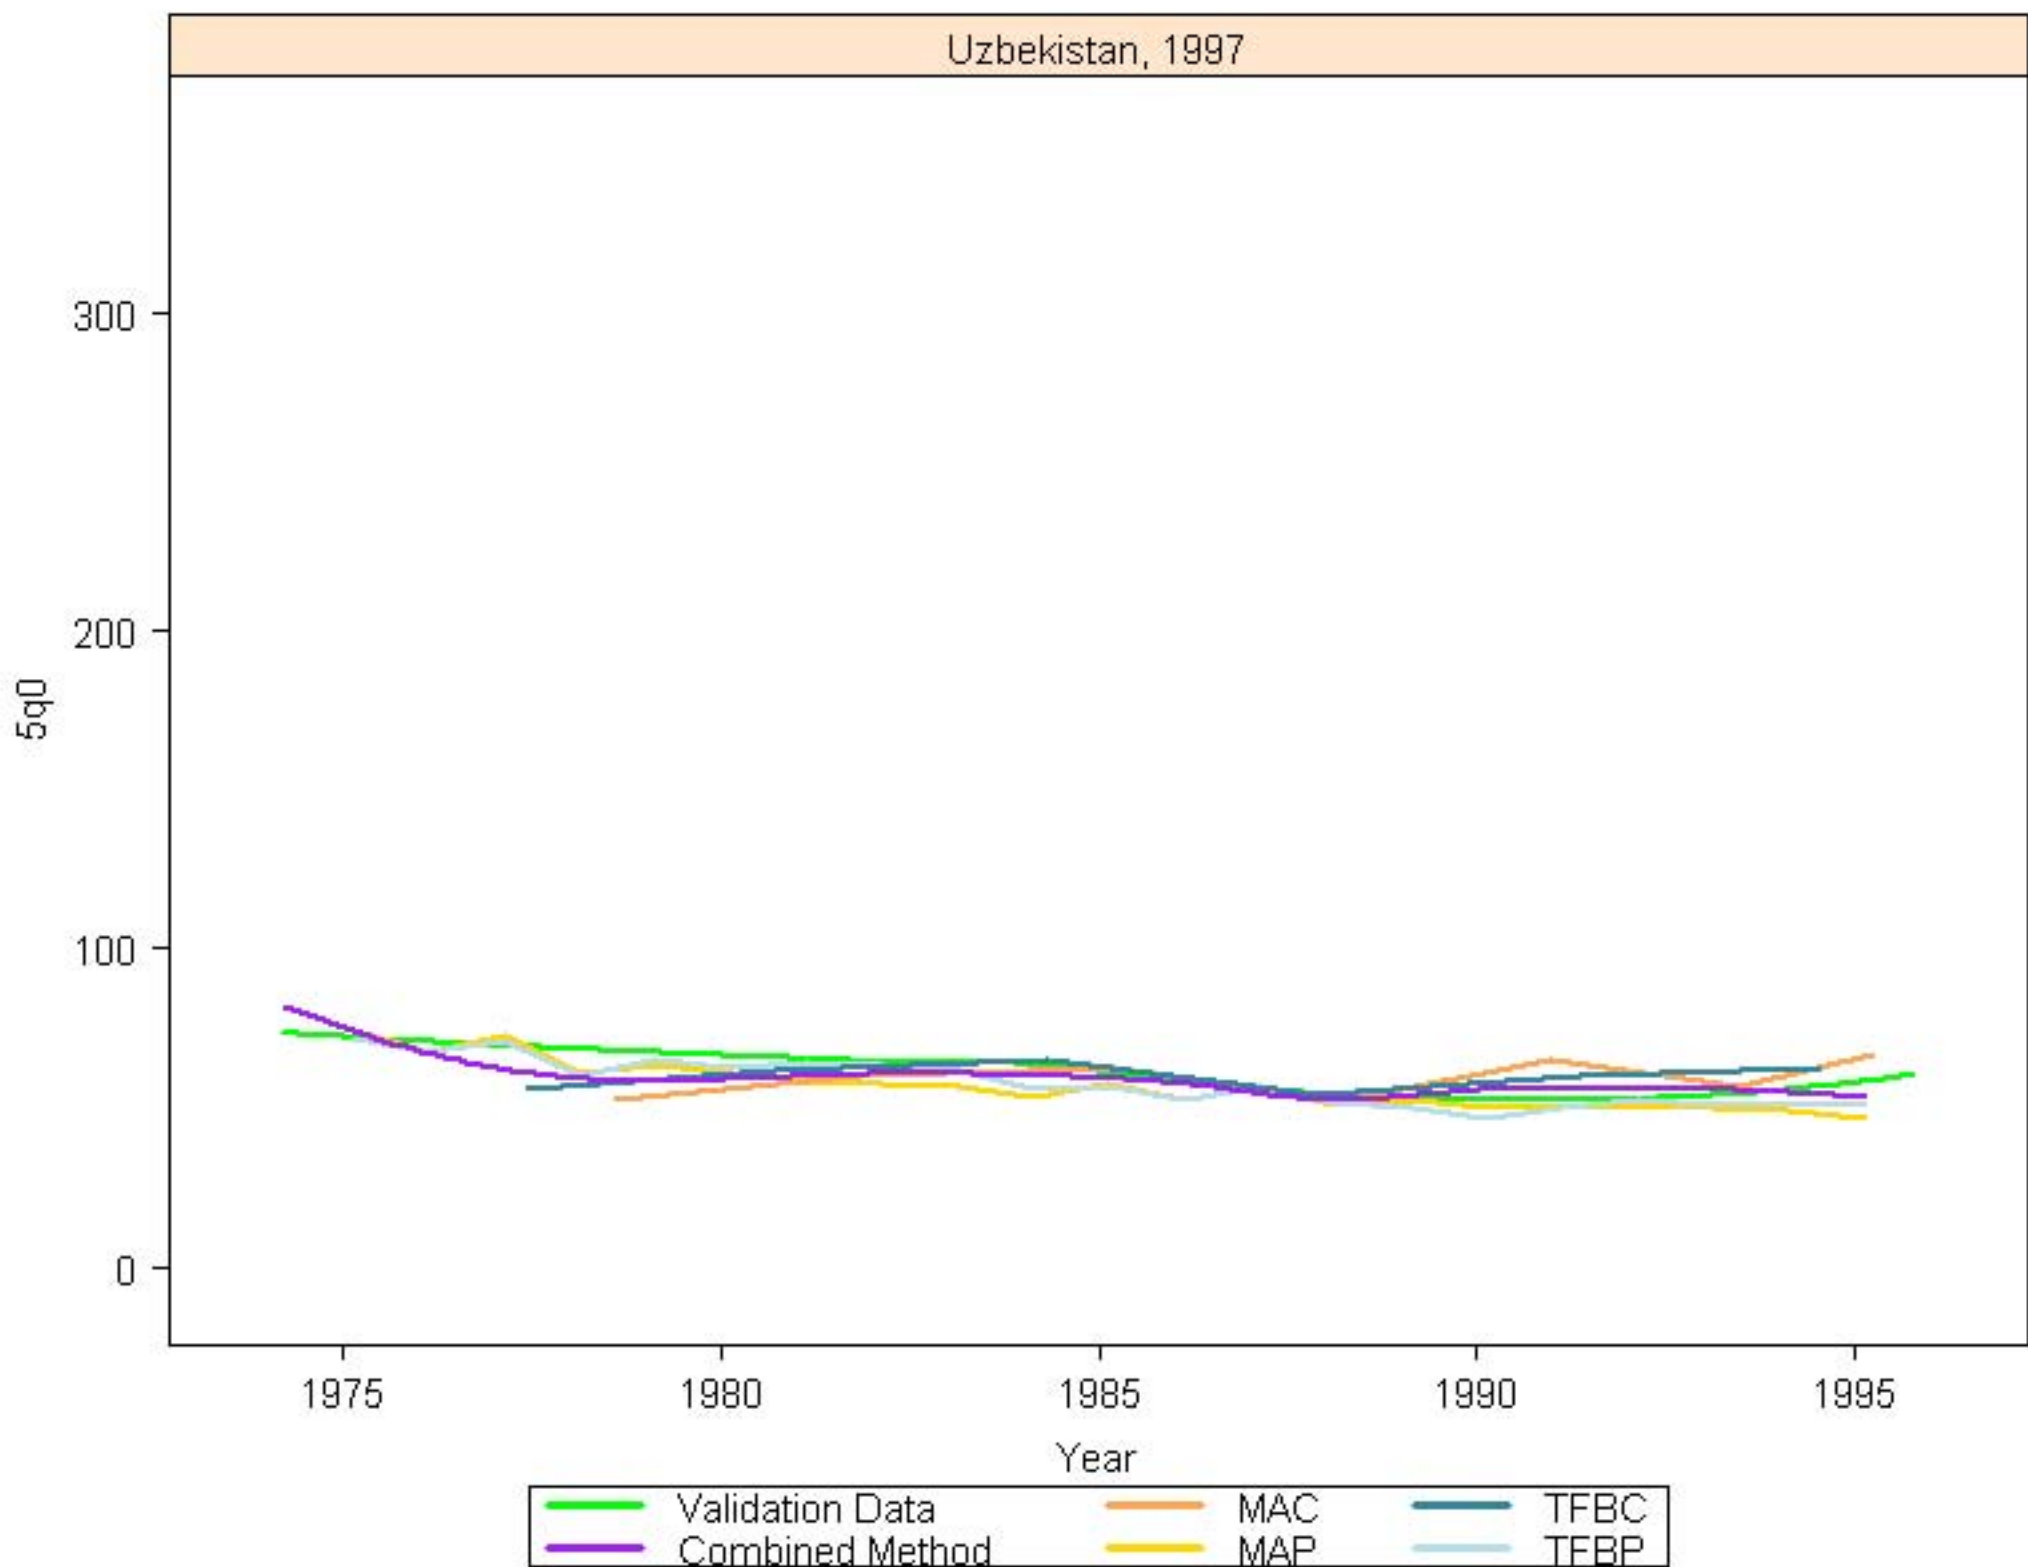

Vietnam, 1998

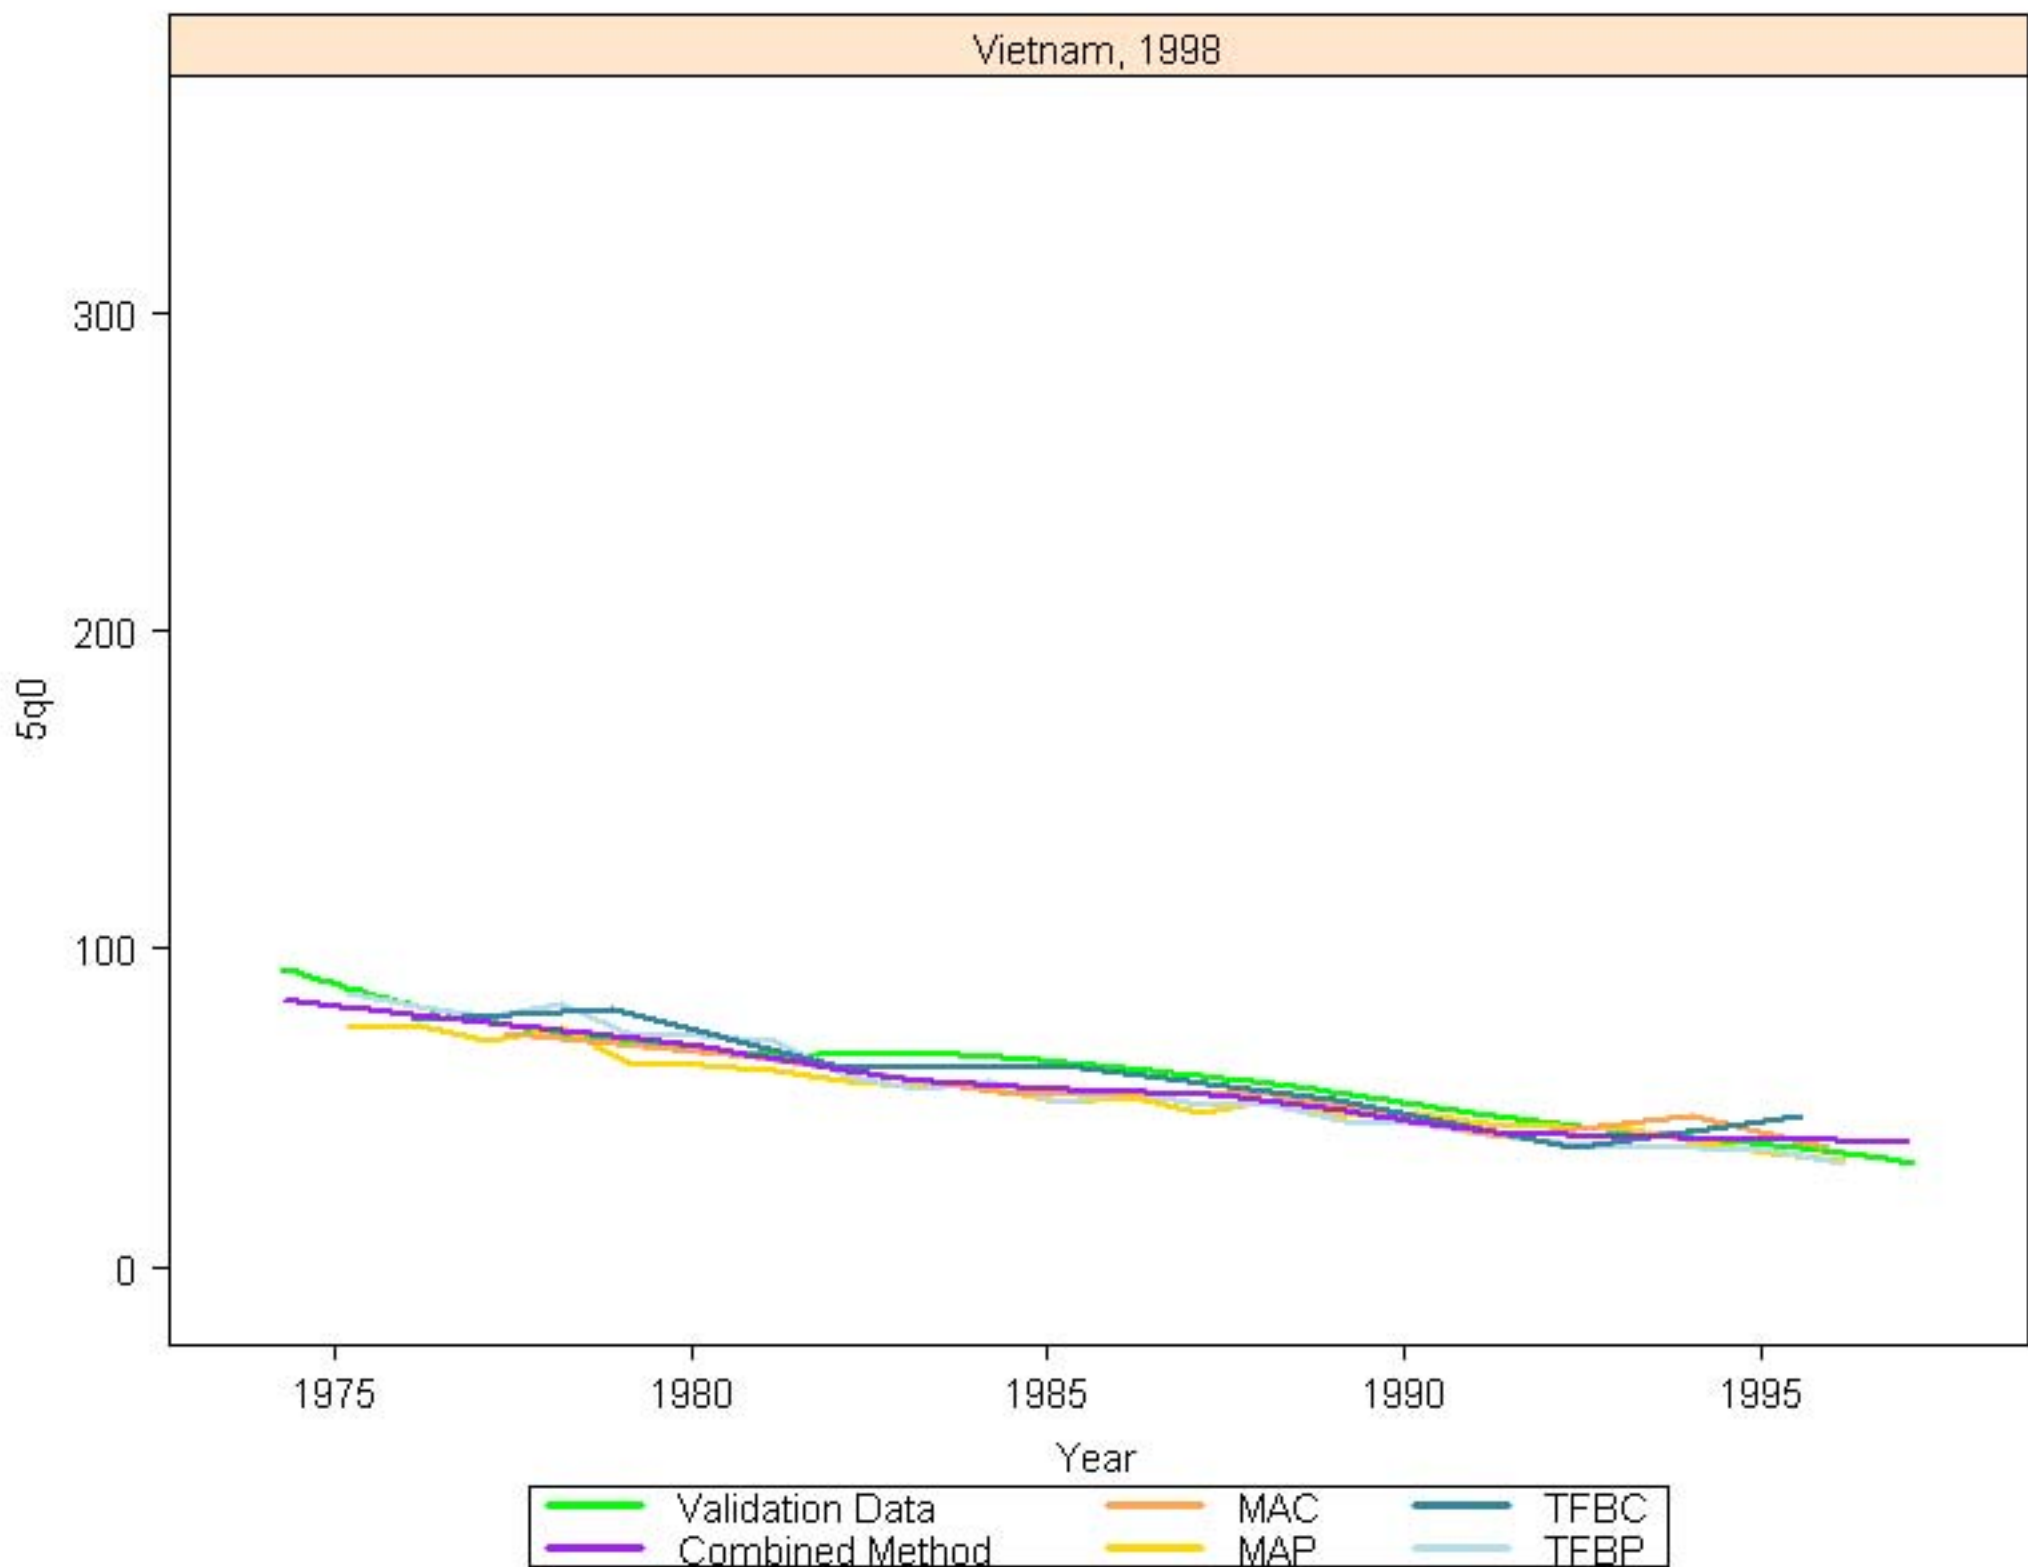

Vietnam, 2003

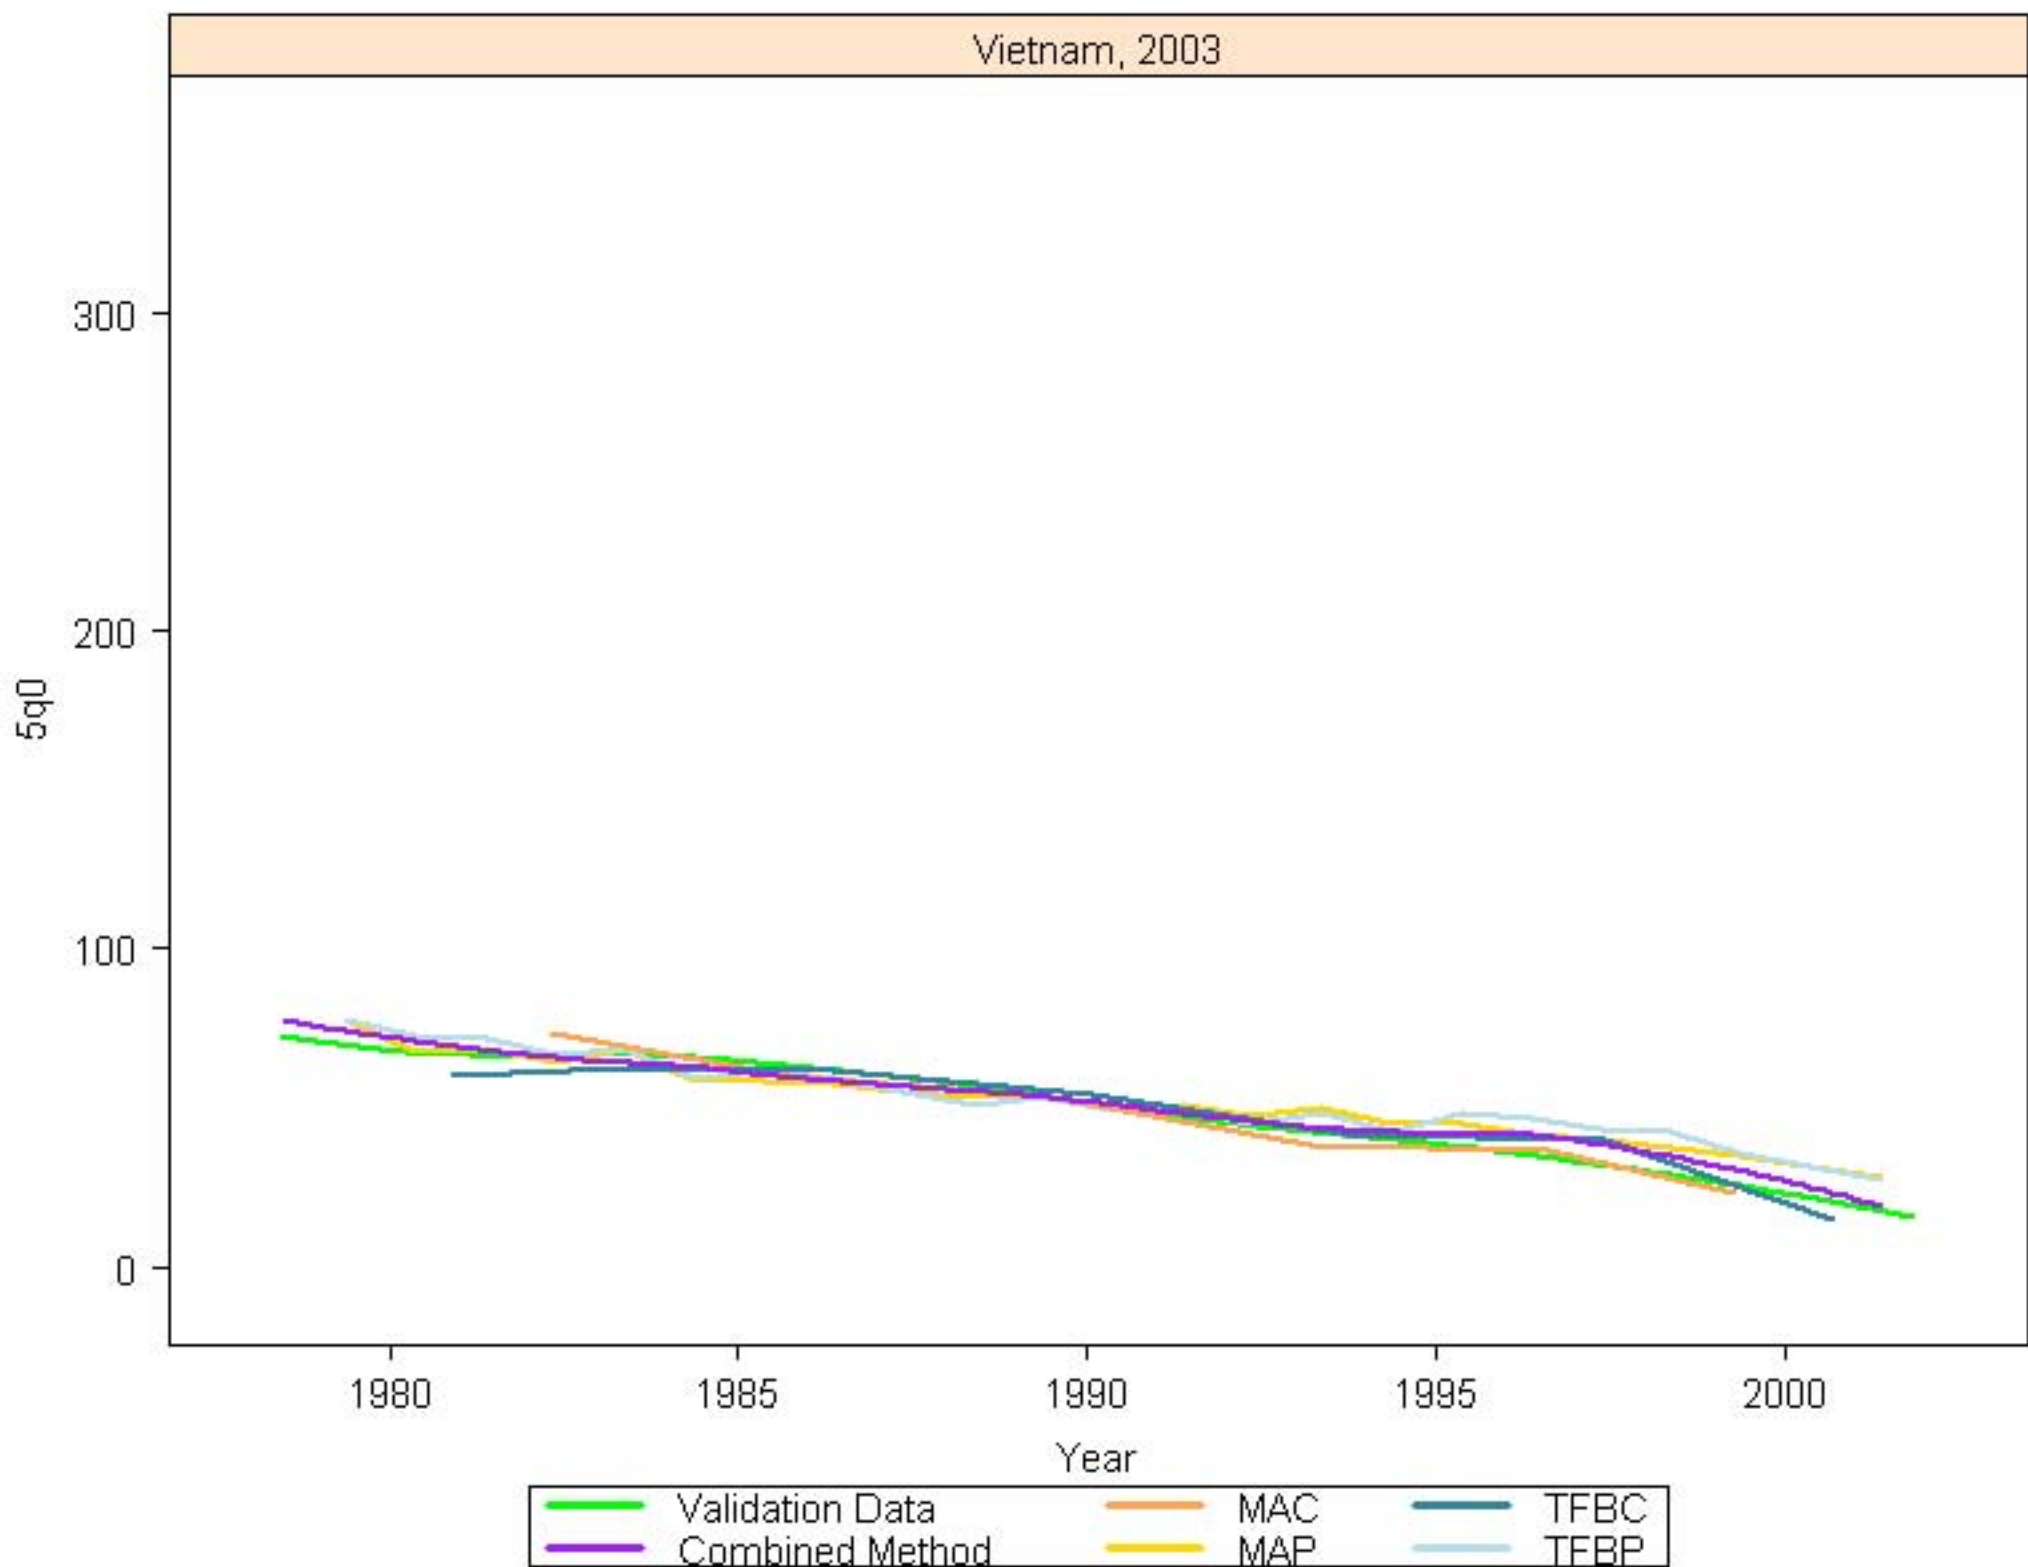

Yemen, 1992

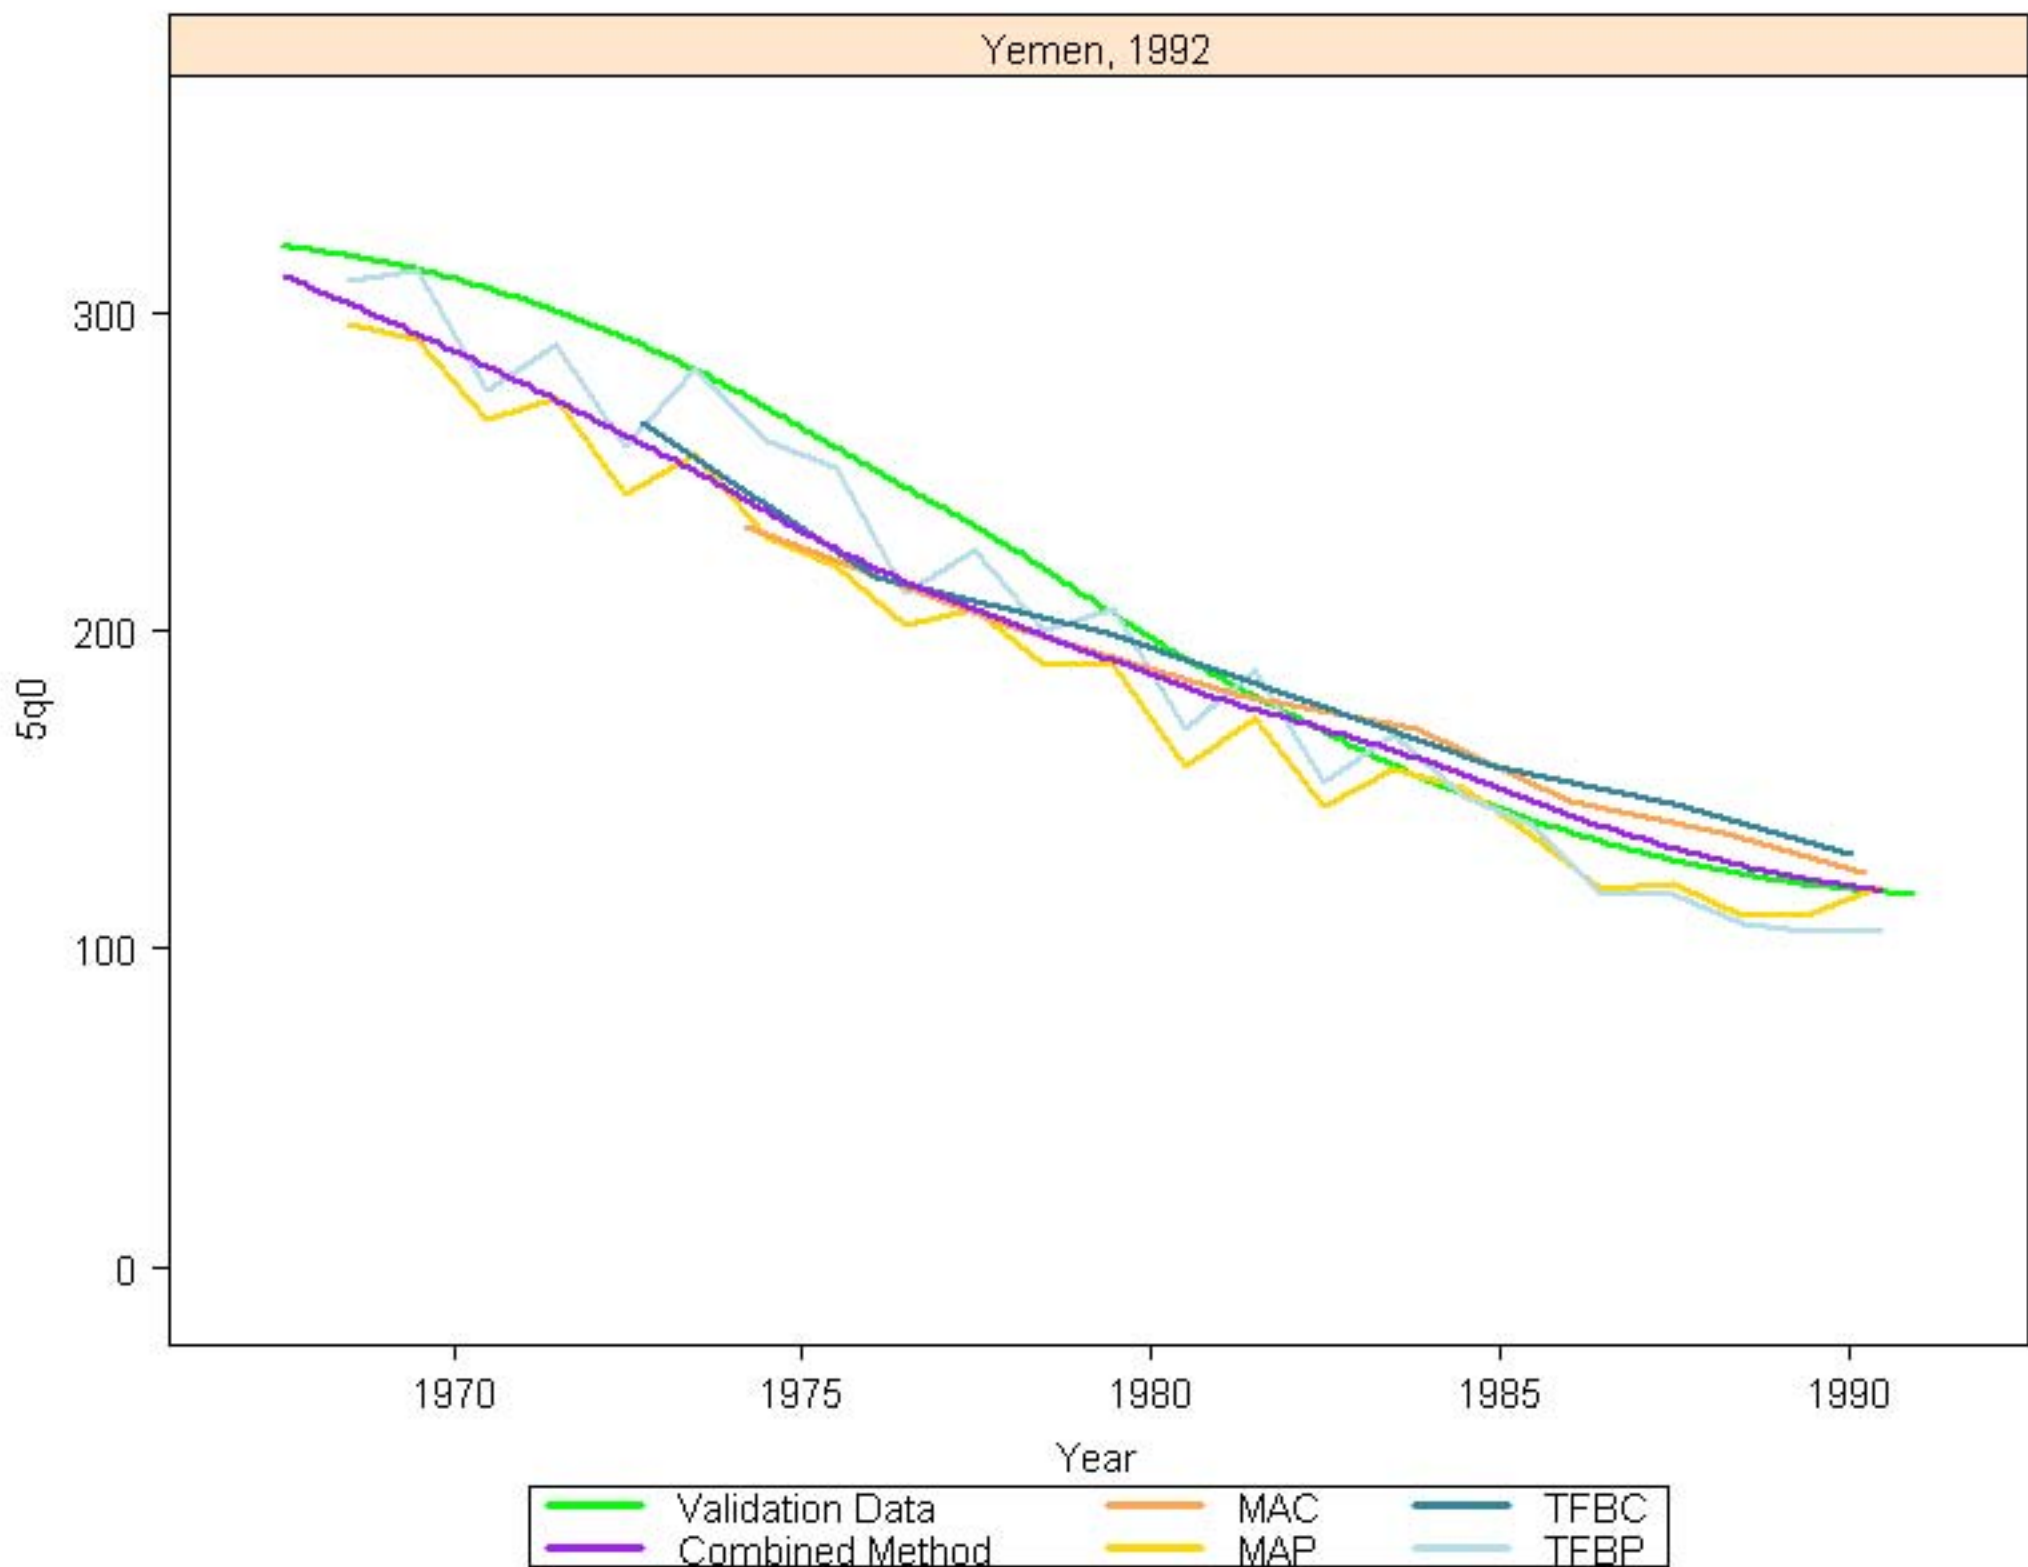

Zambia, 1992

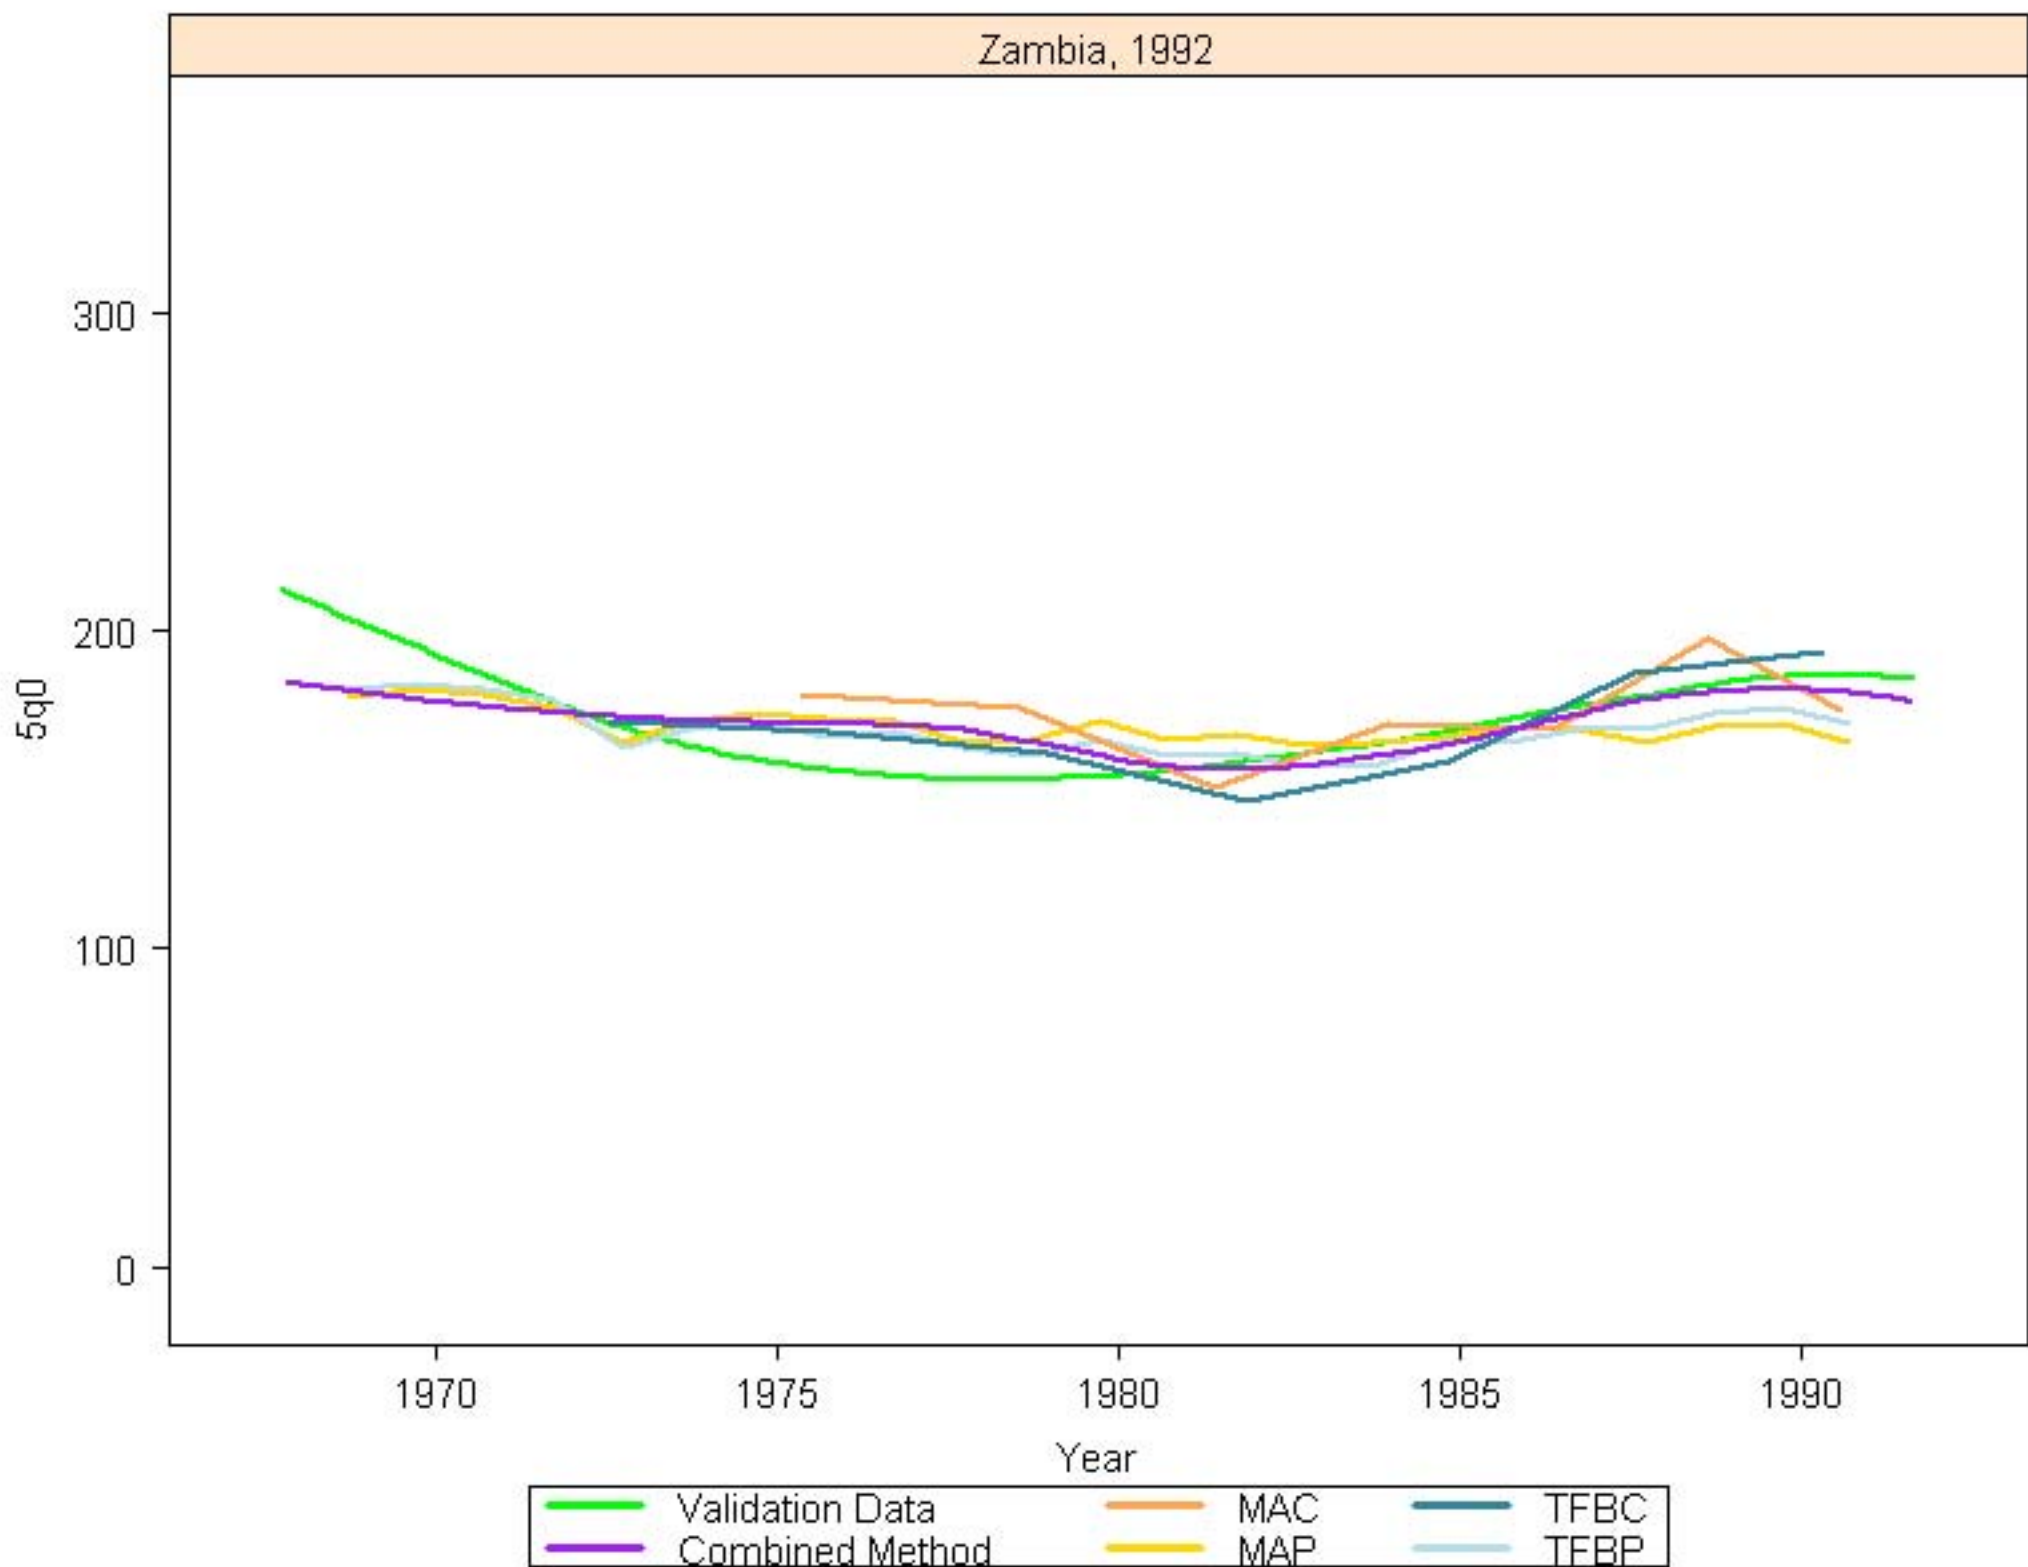



Zambia, 1997

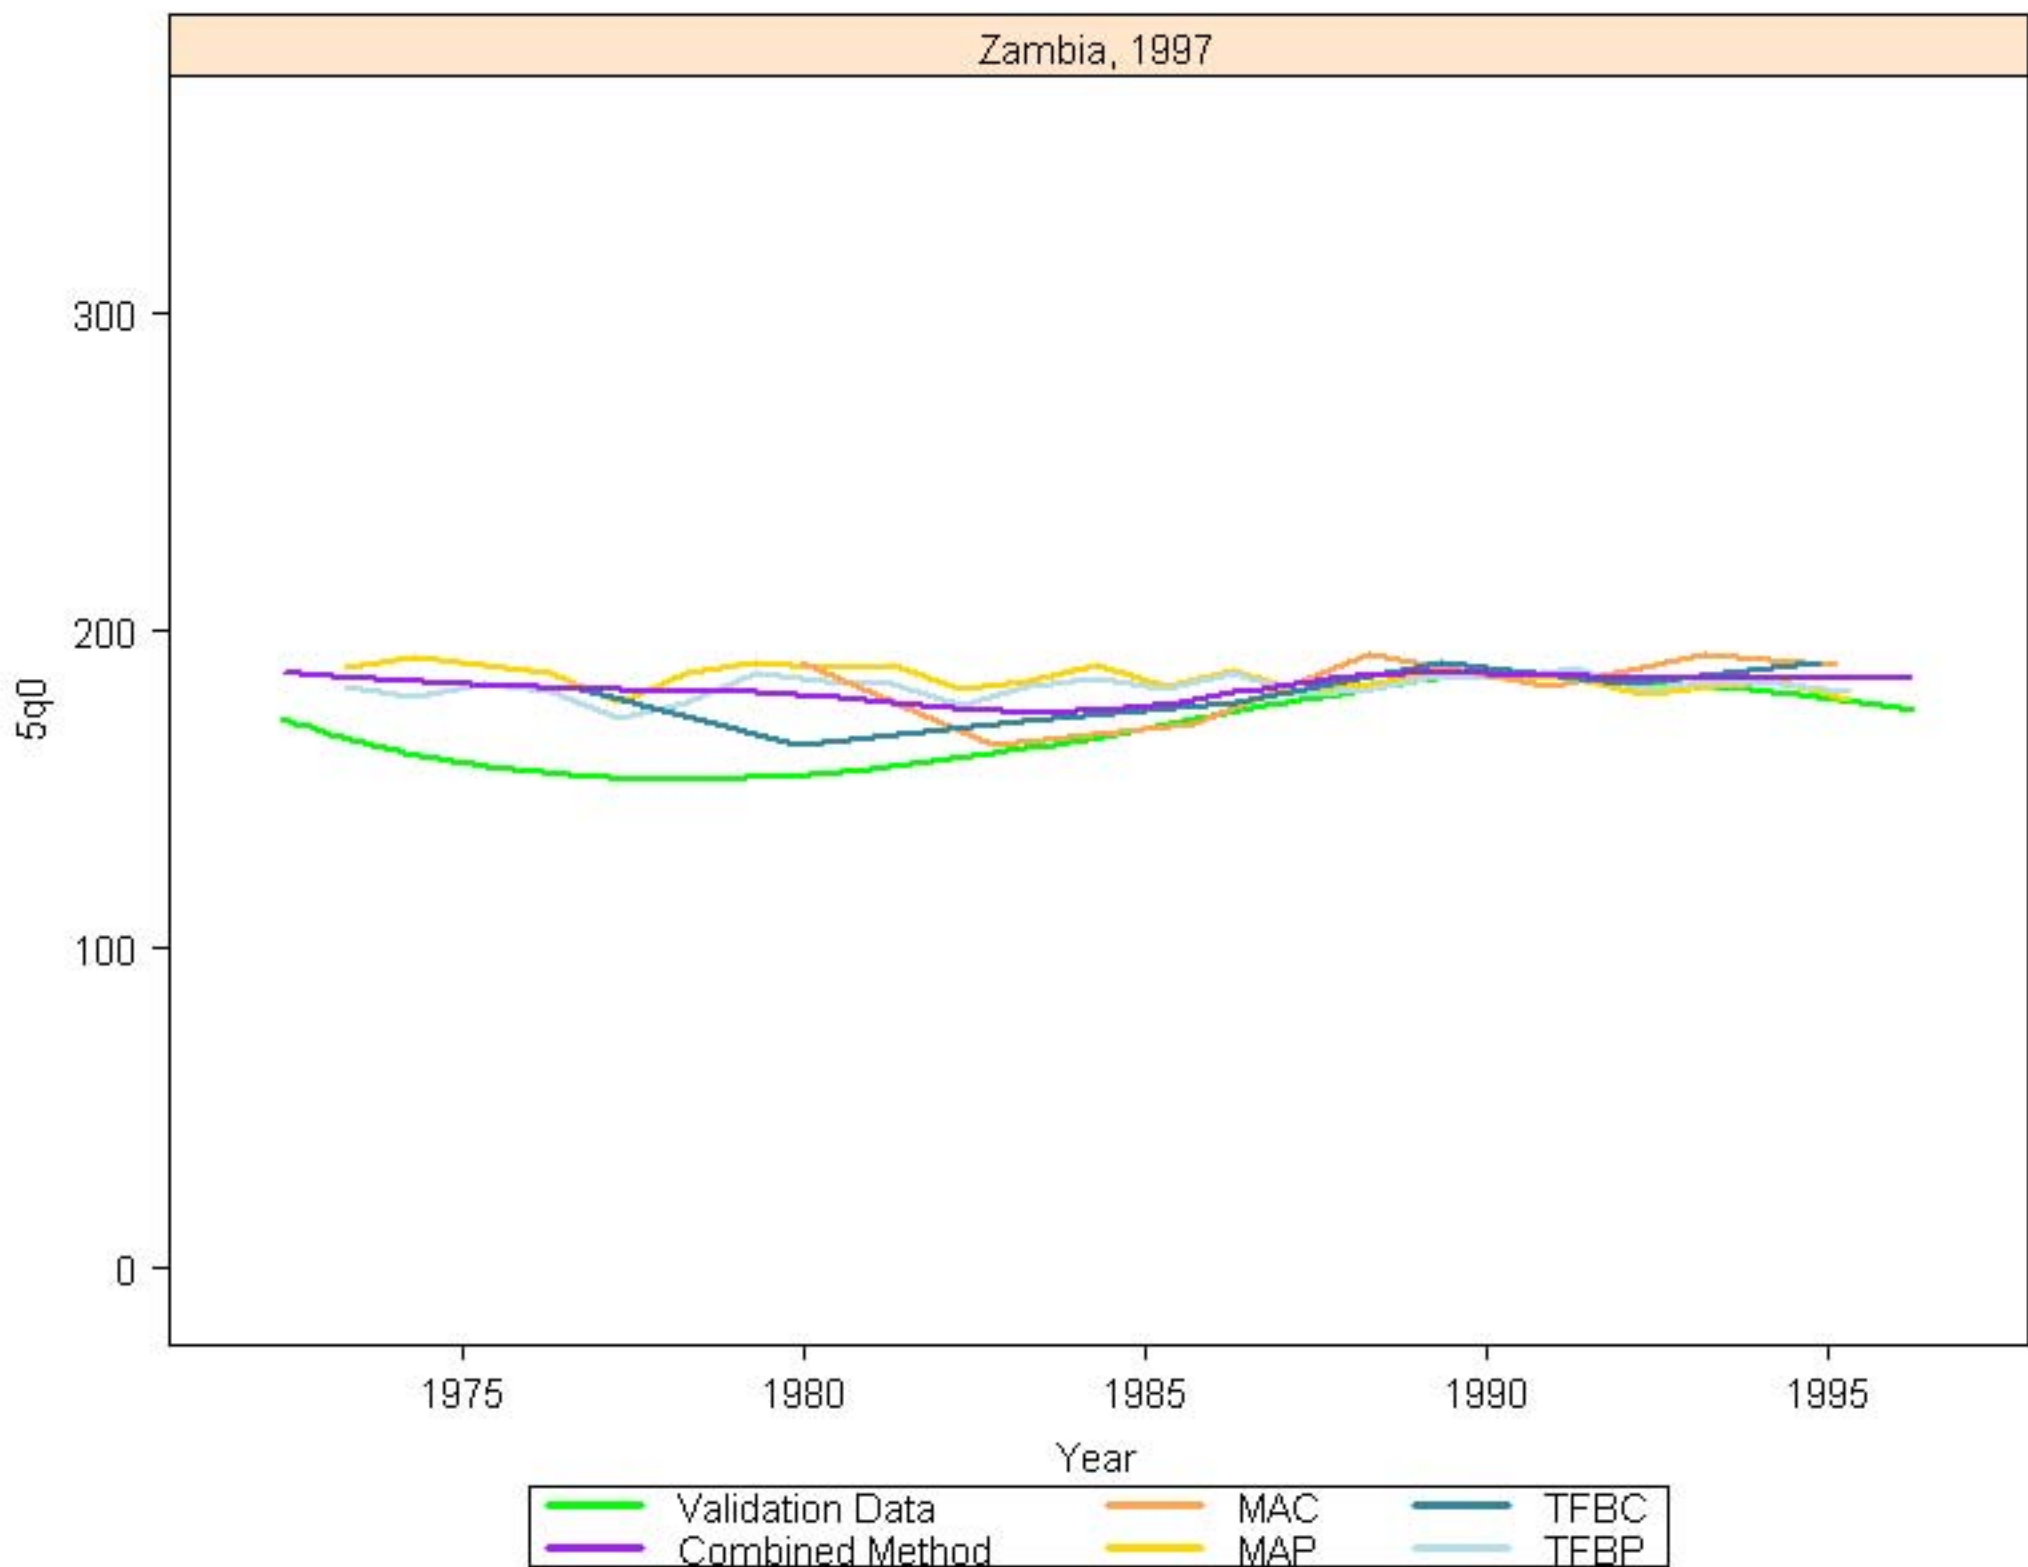

Zambia, 2002

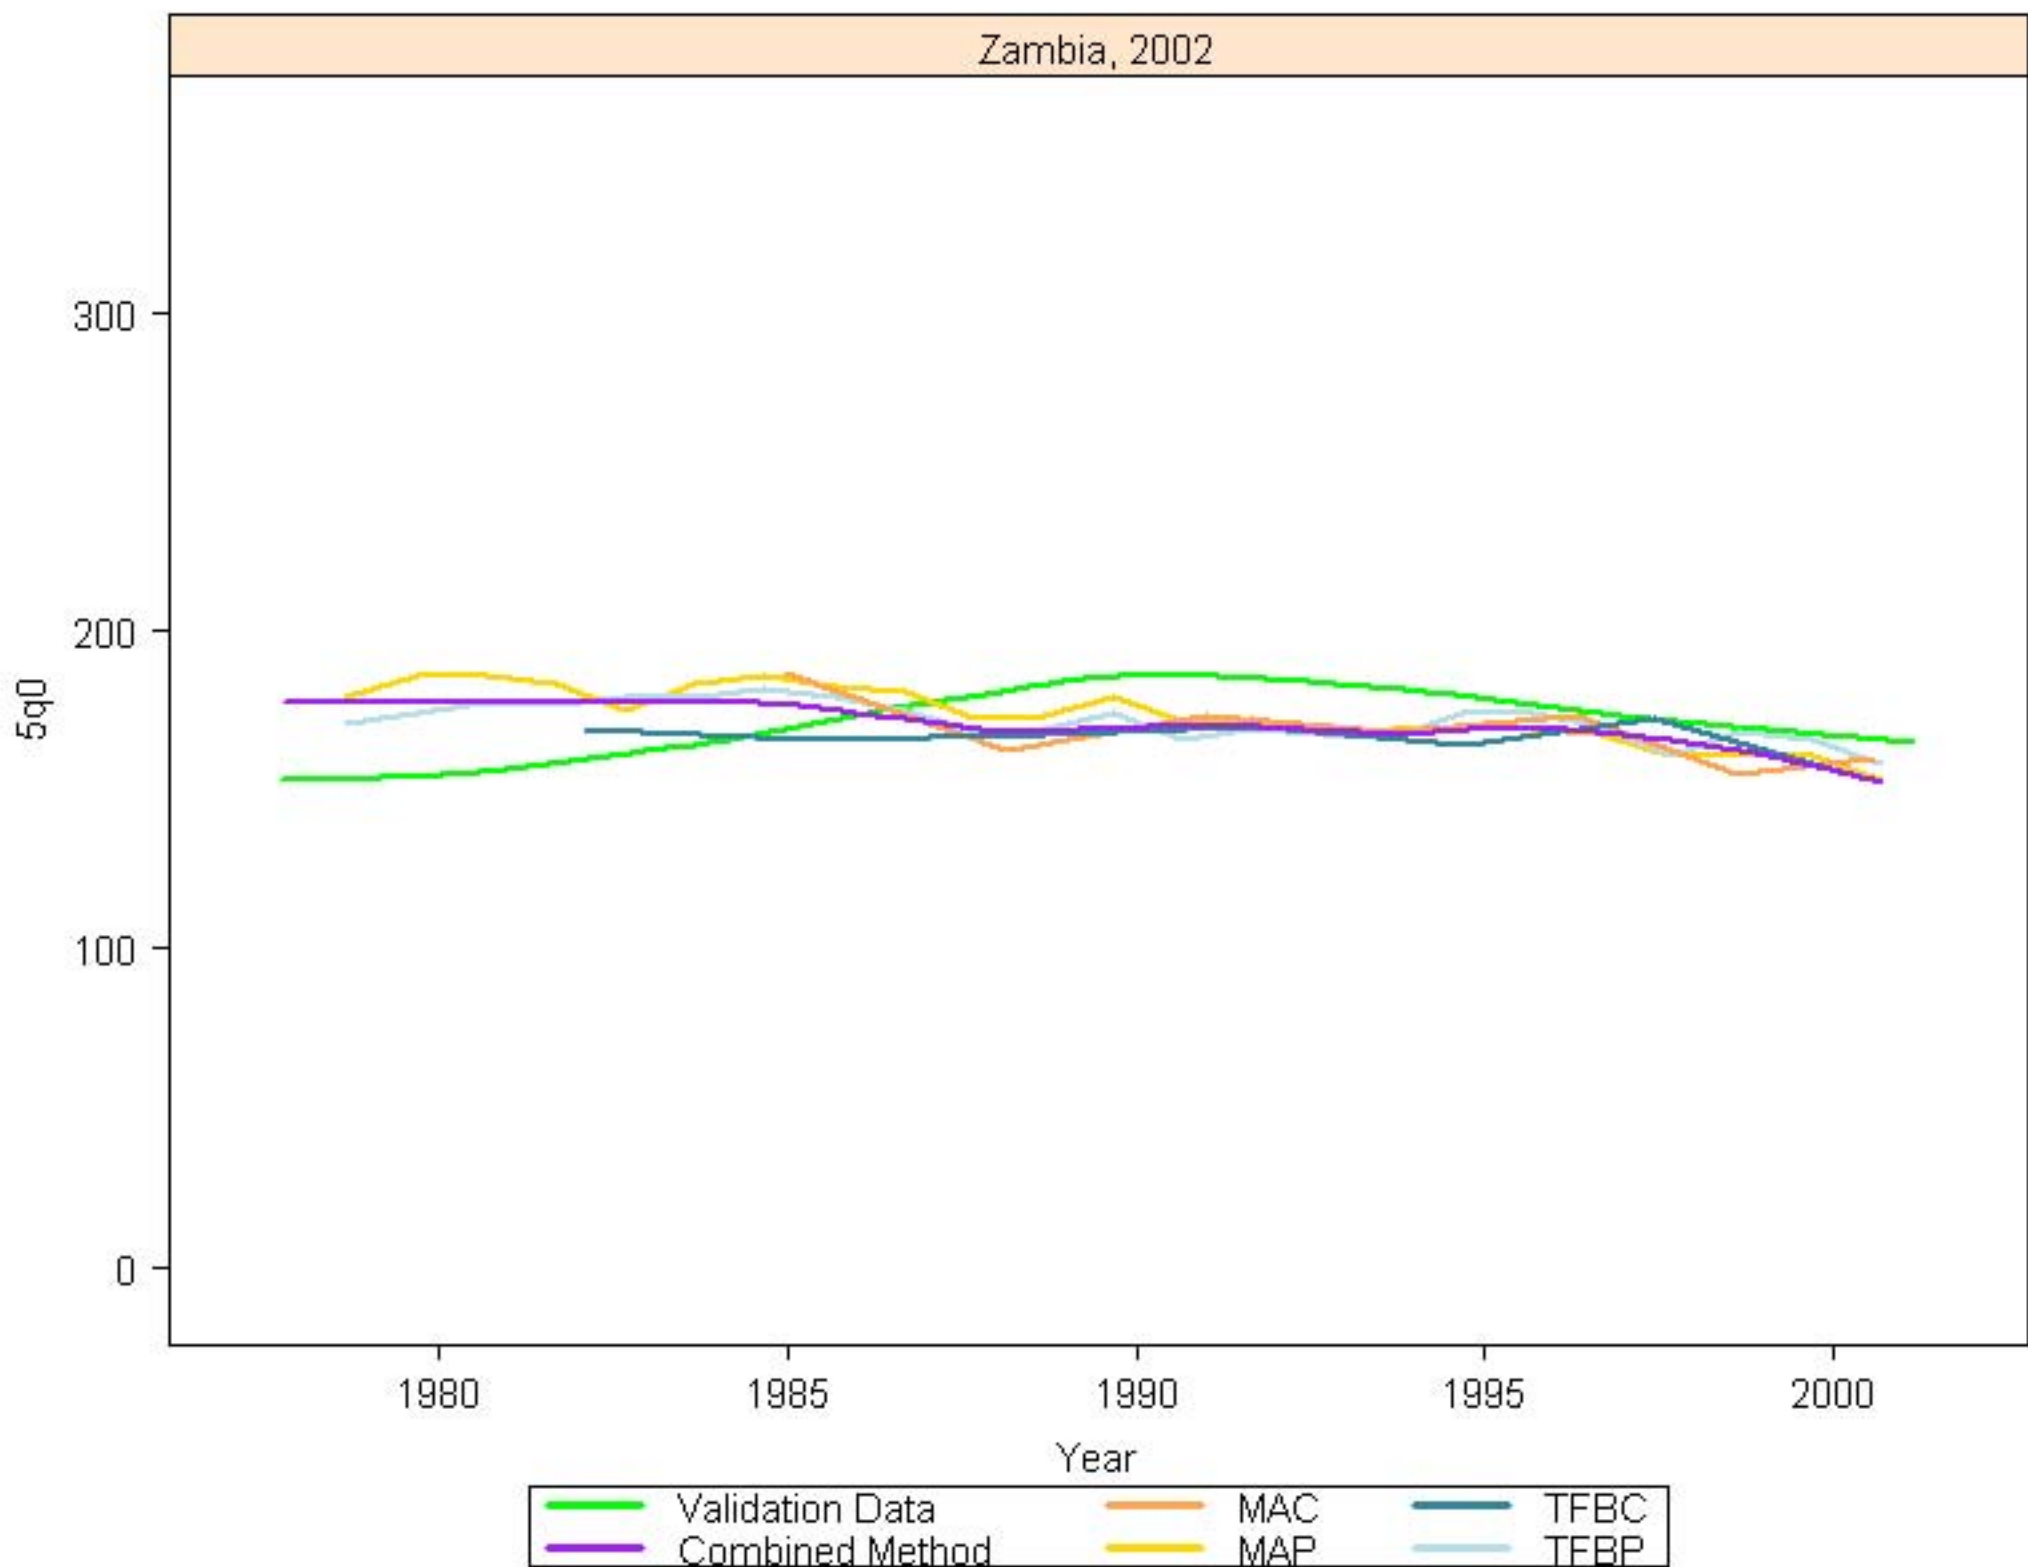

Zimbabwe, 1989

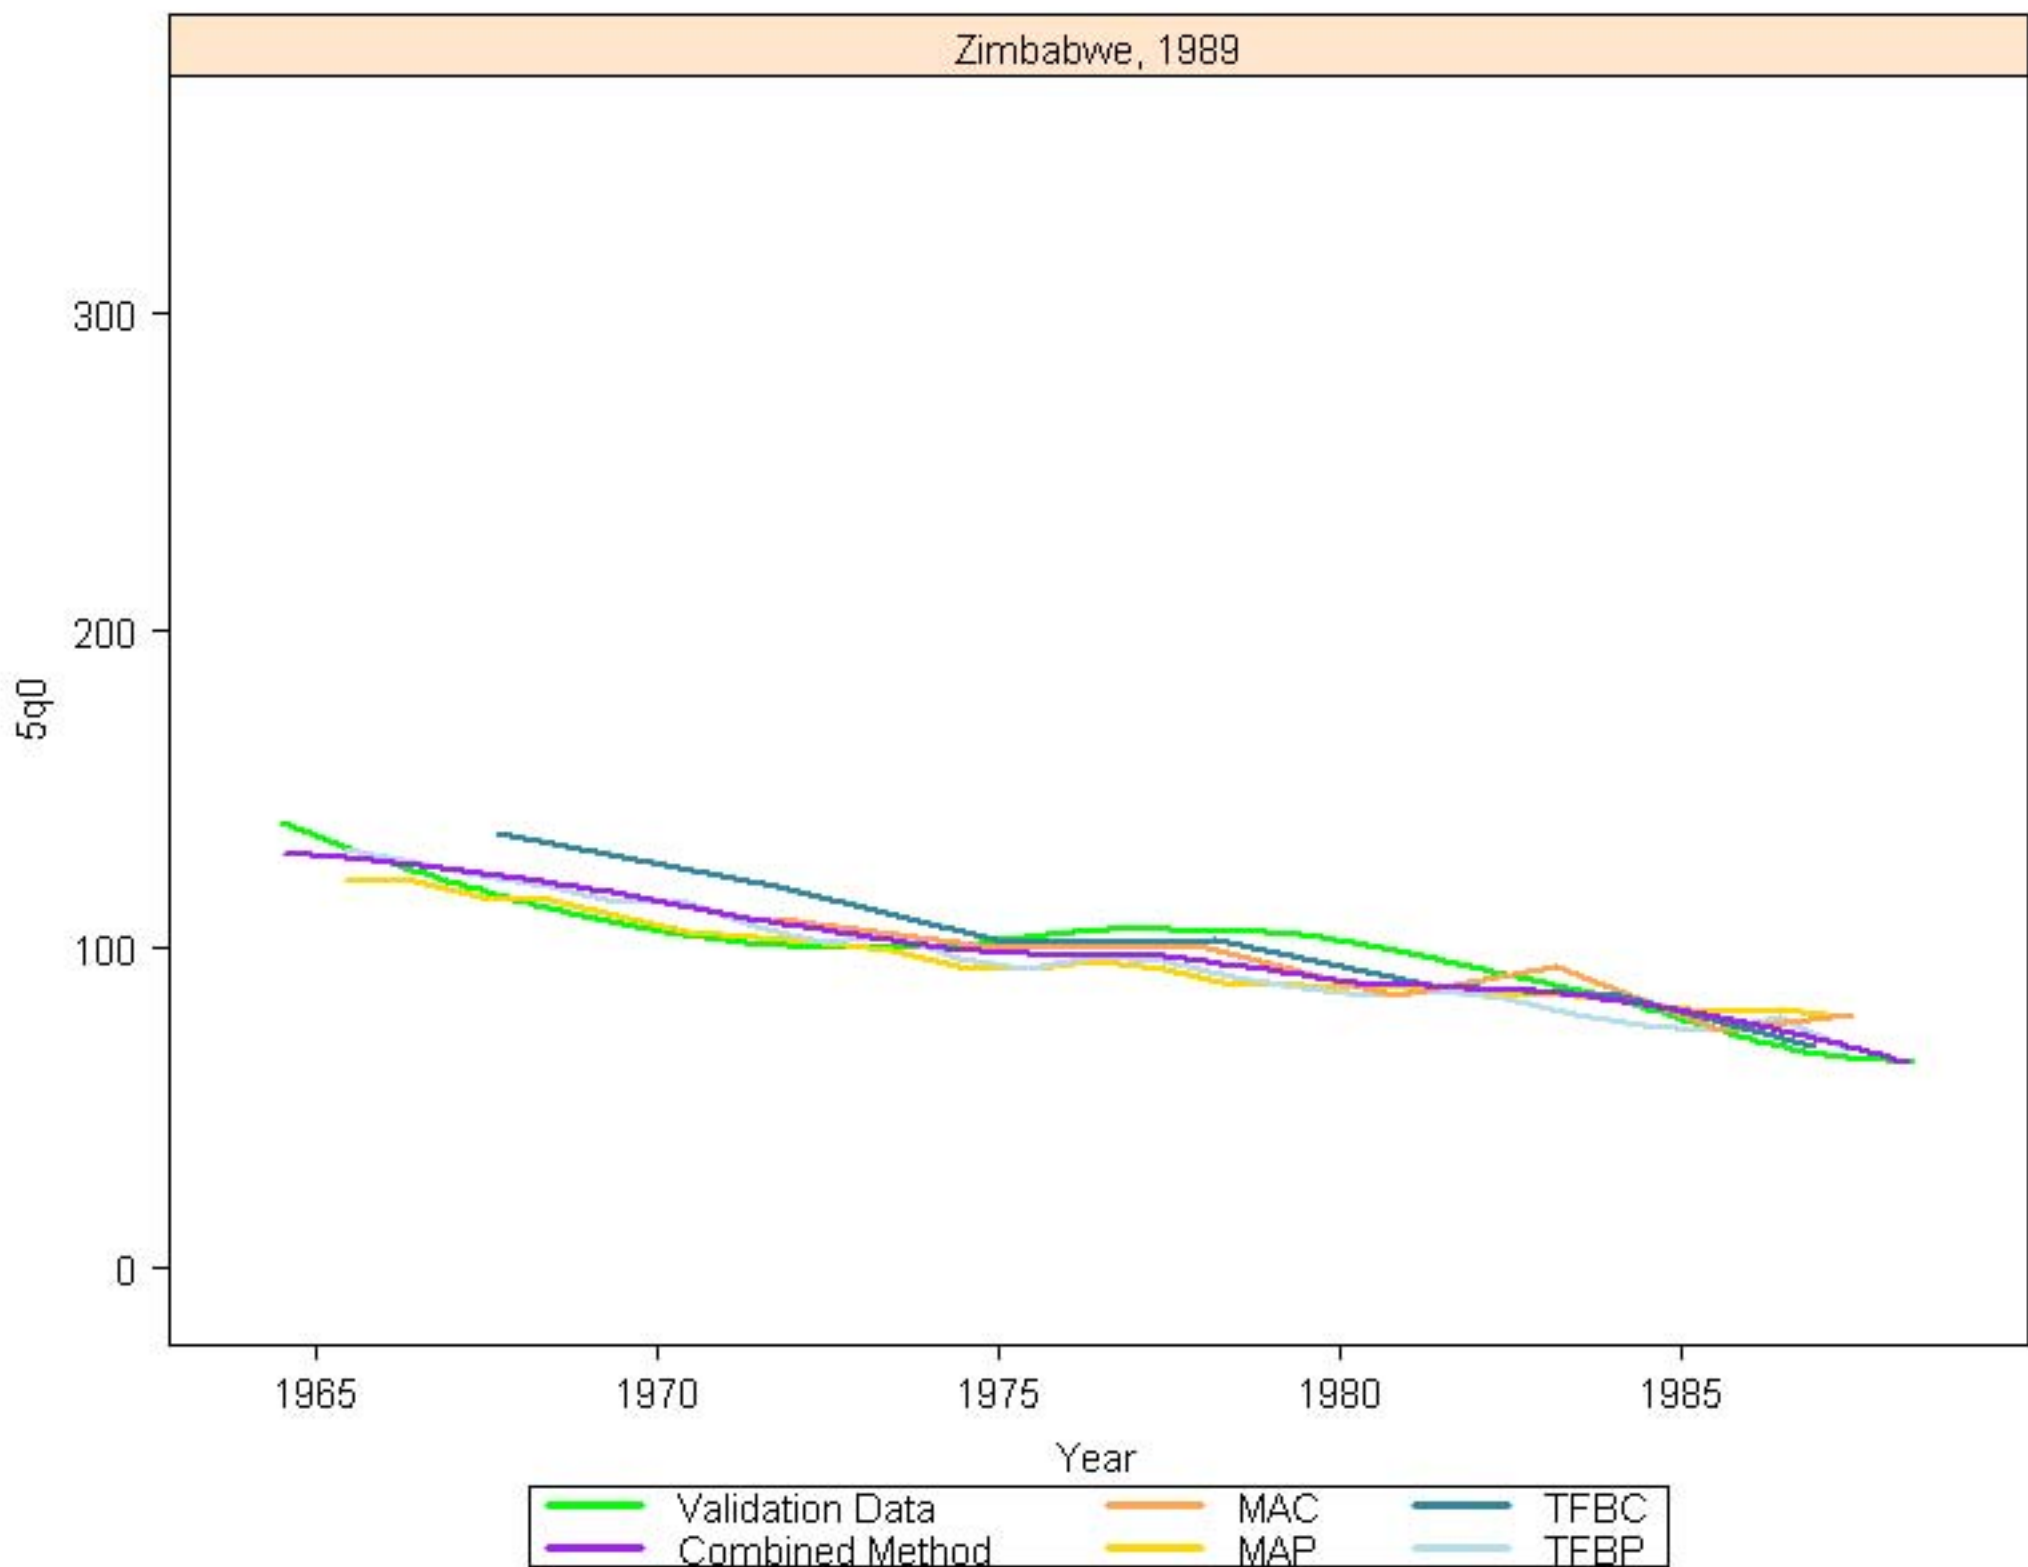

Zimbabwe, 1995

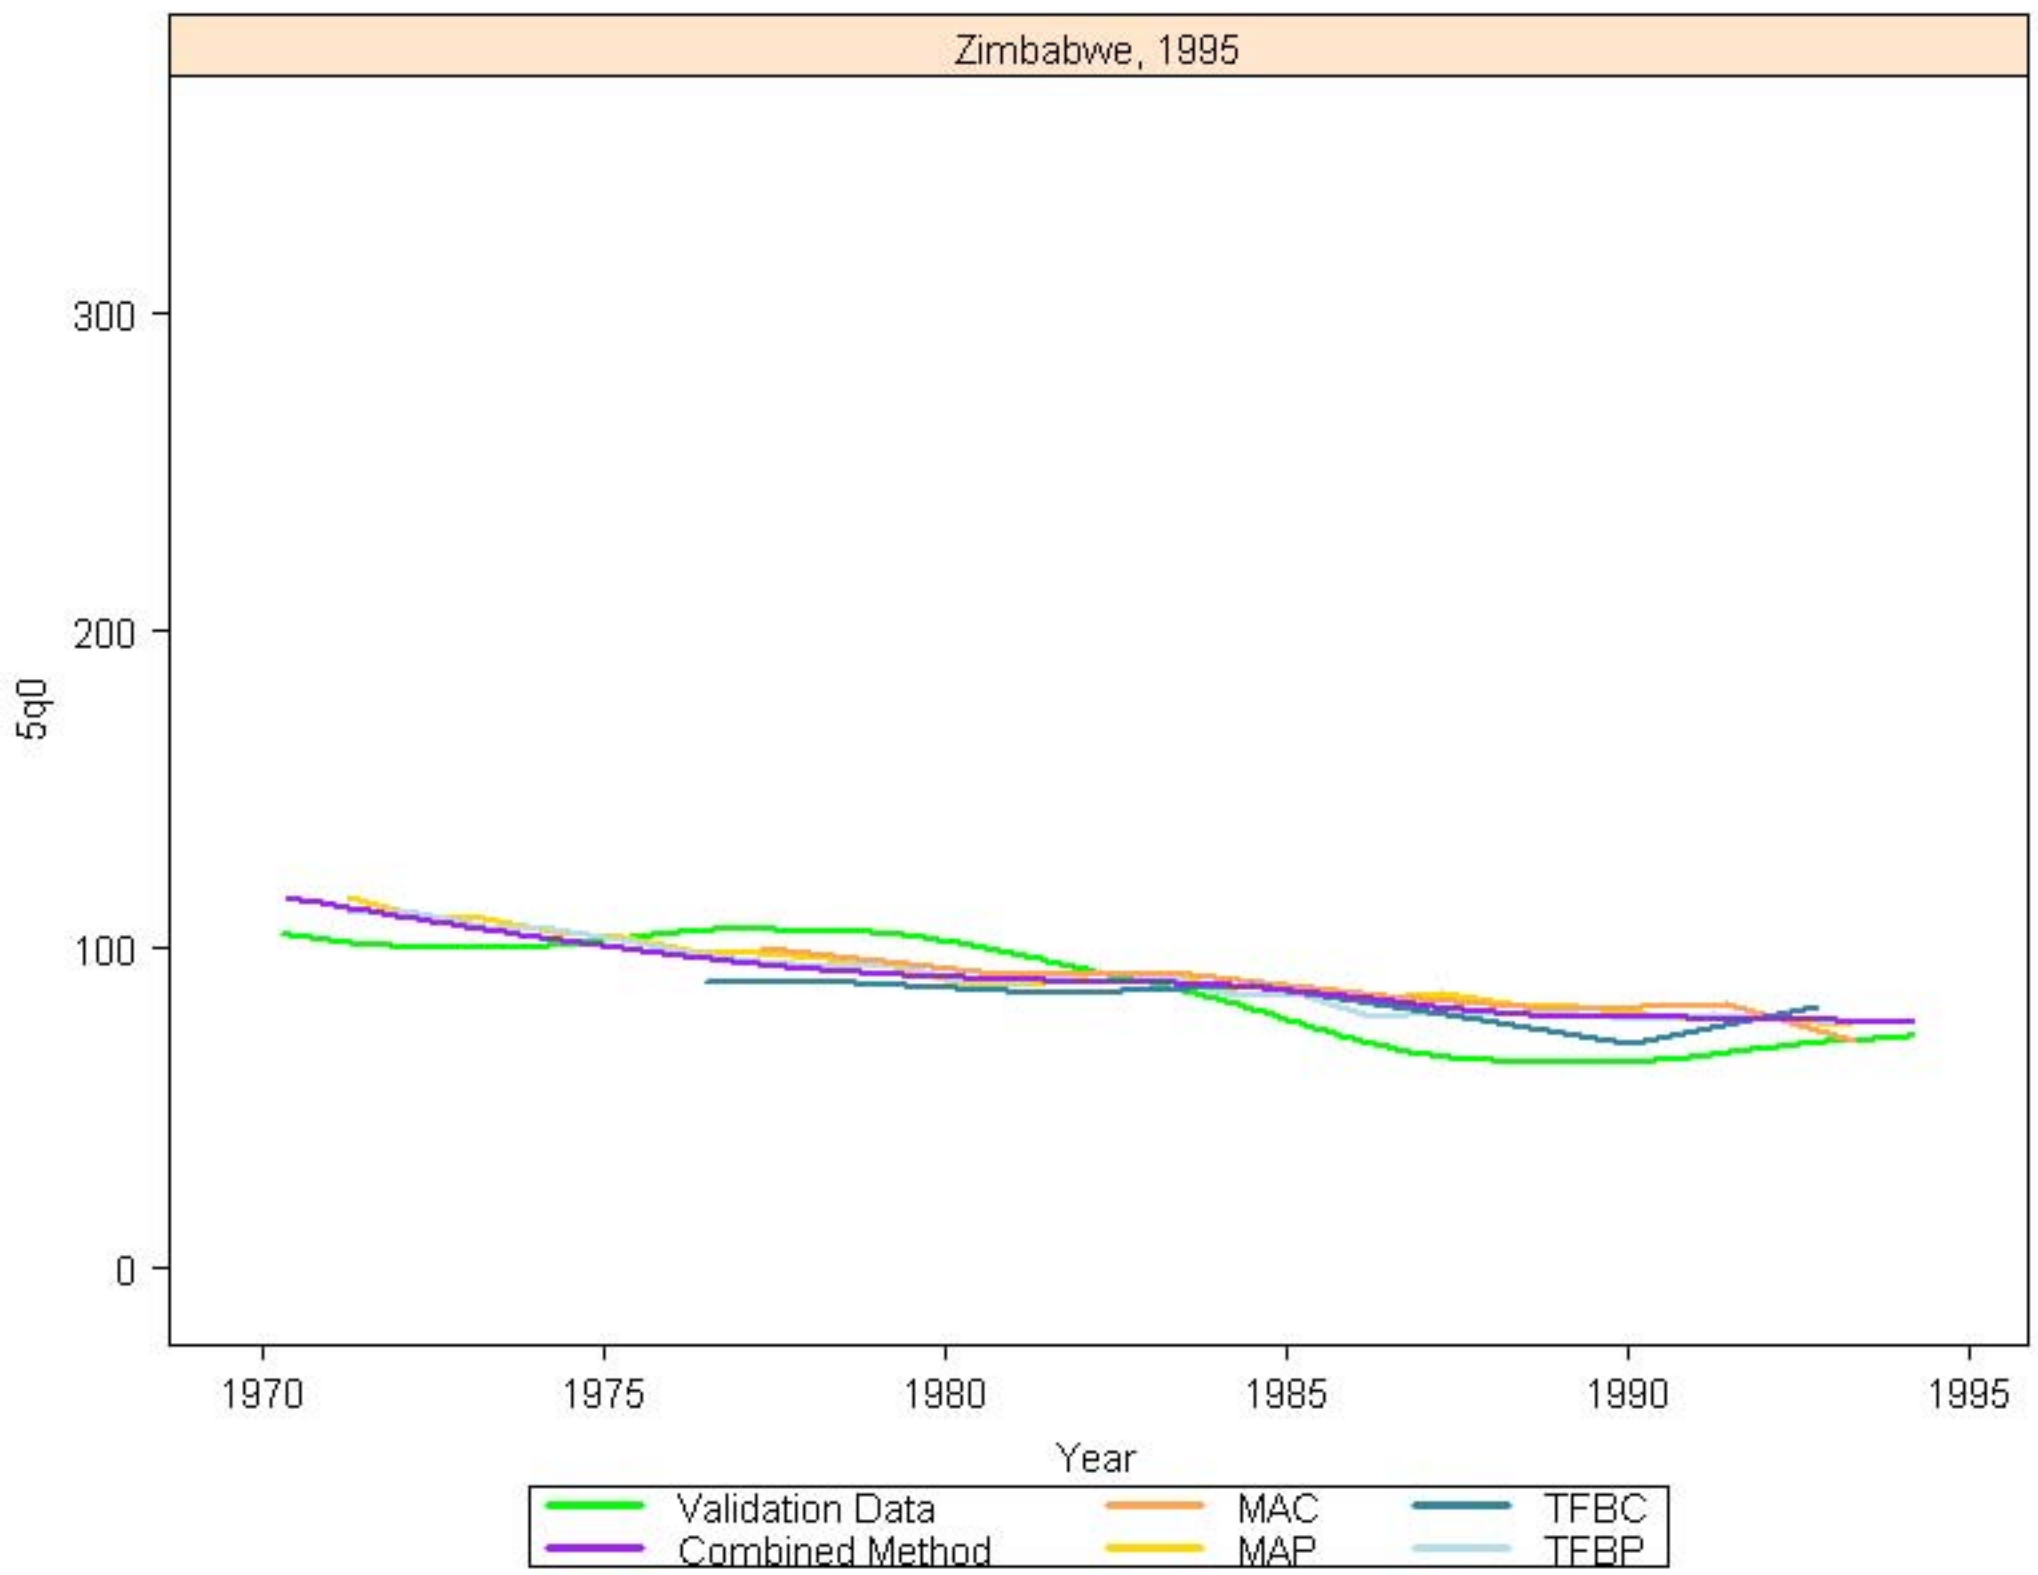

Zimbabwe, 2000

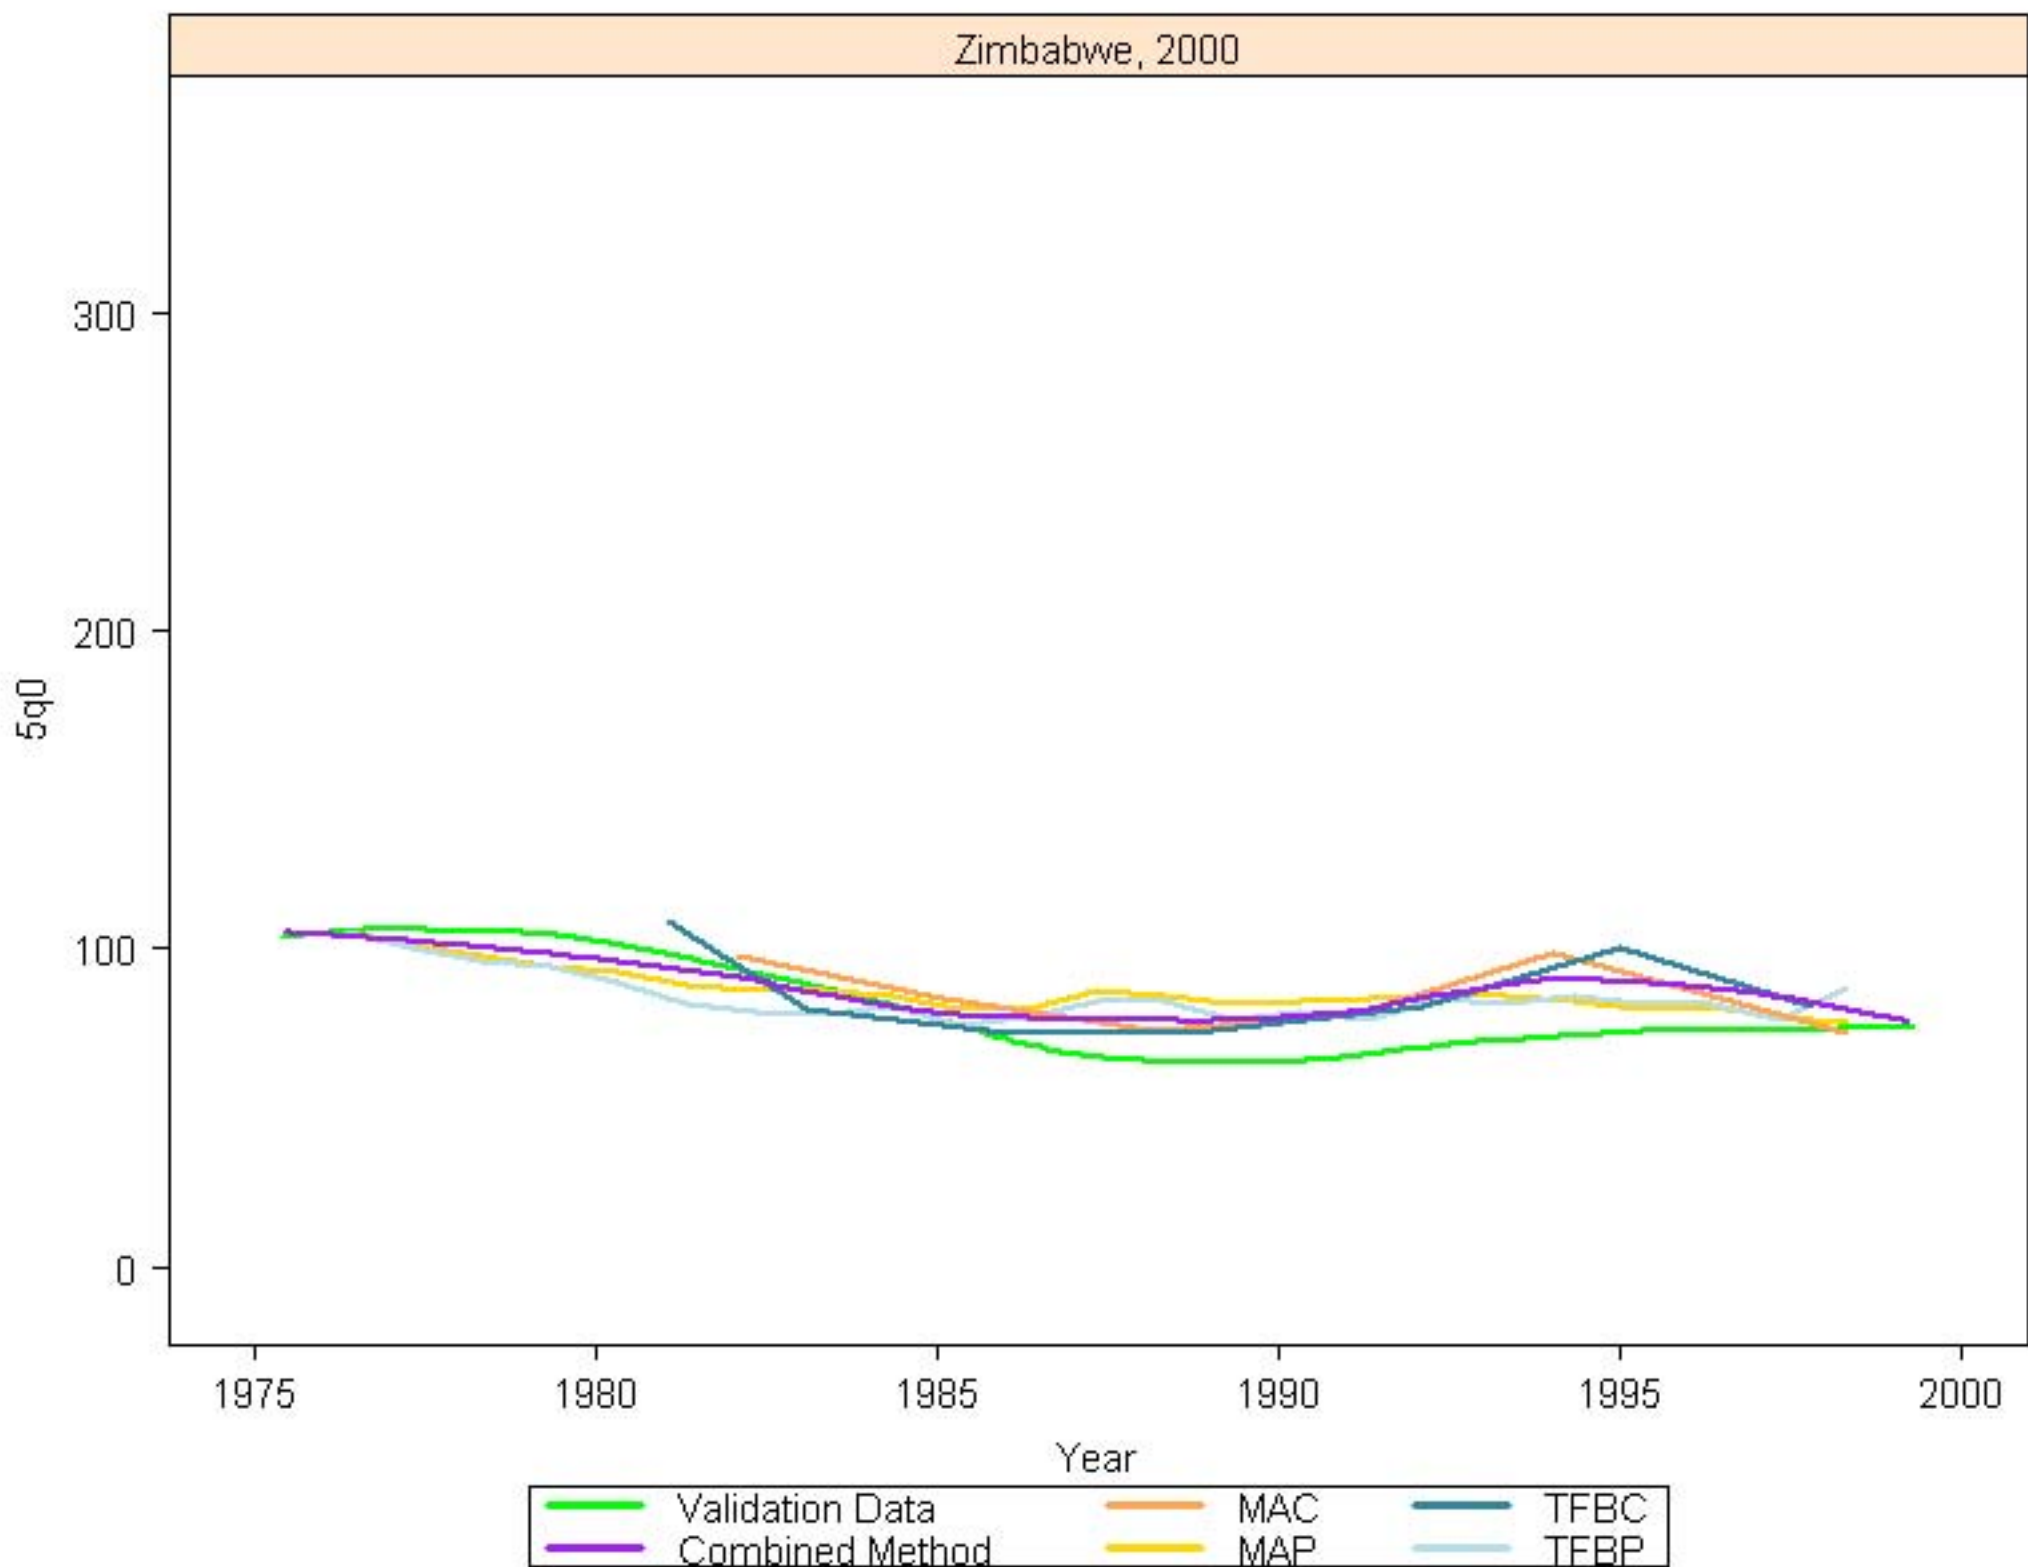

Zimbabwe, 2006

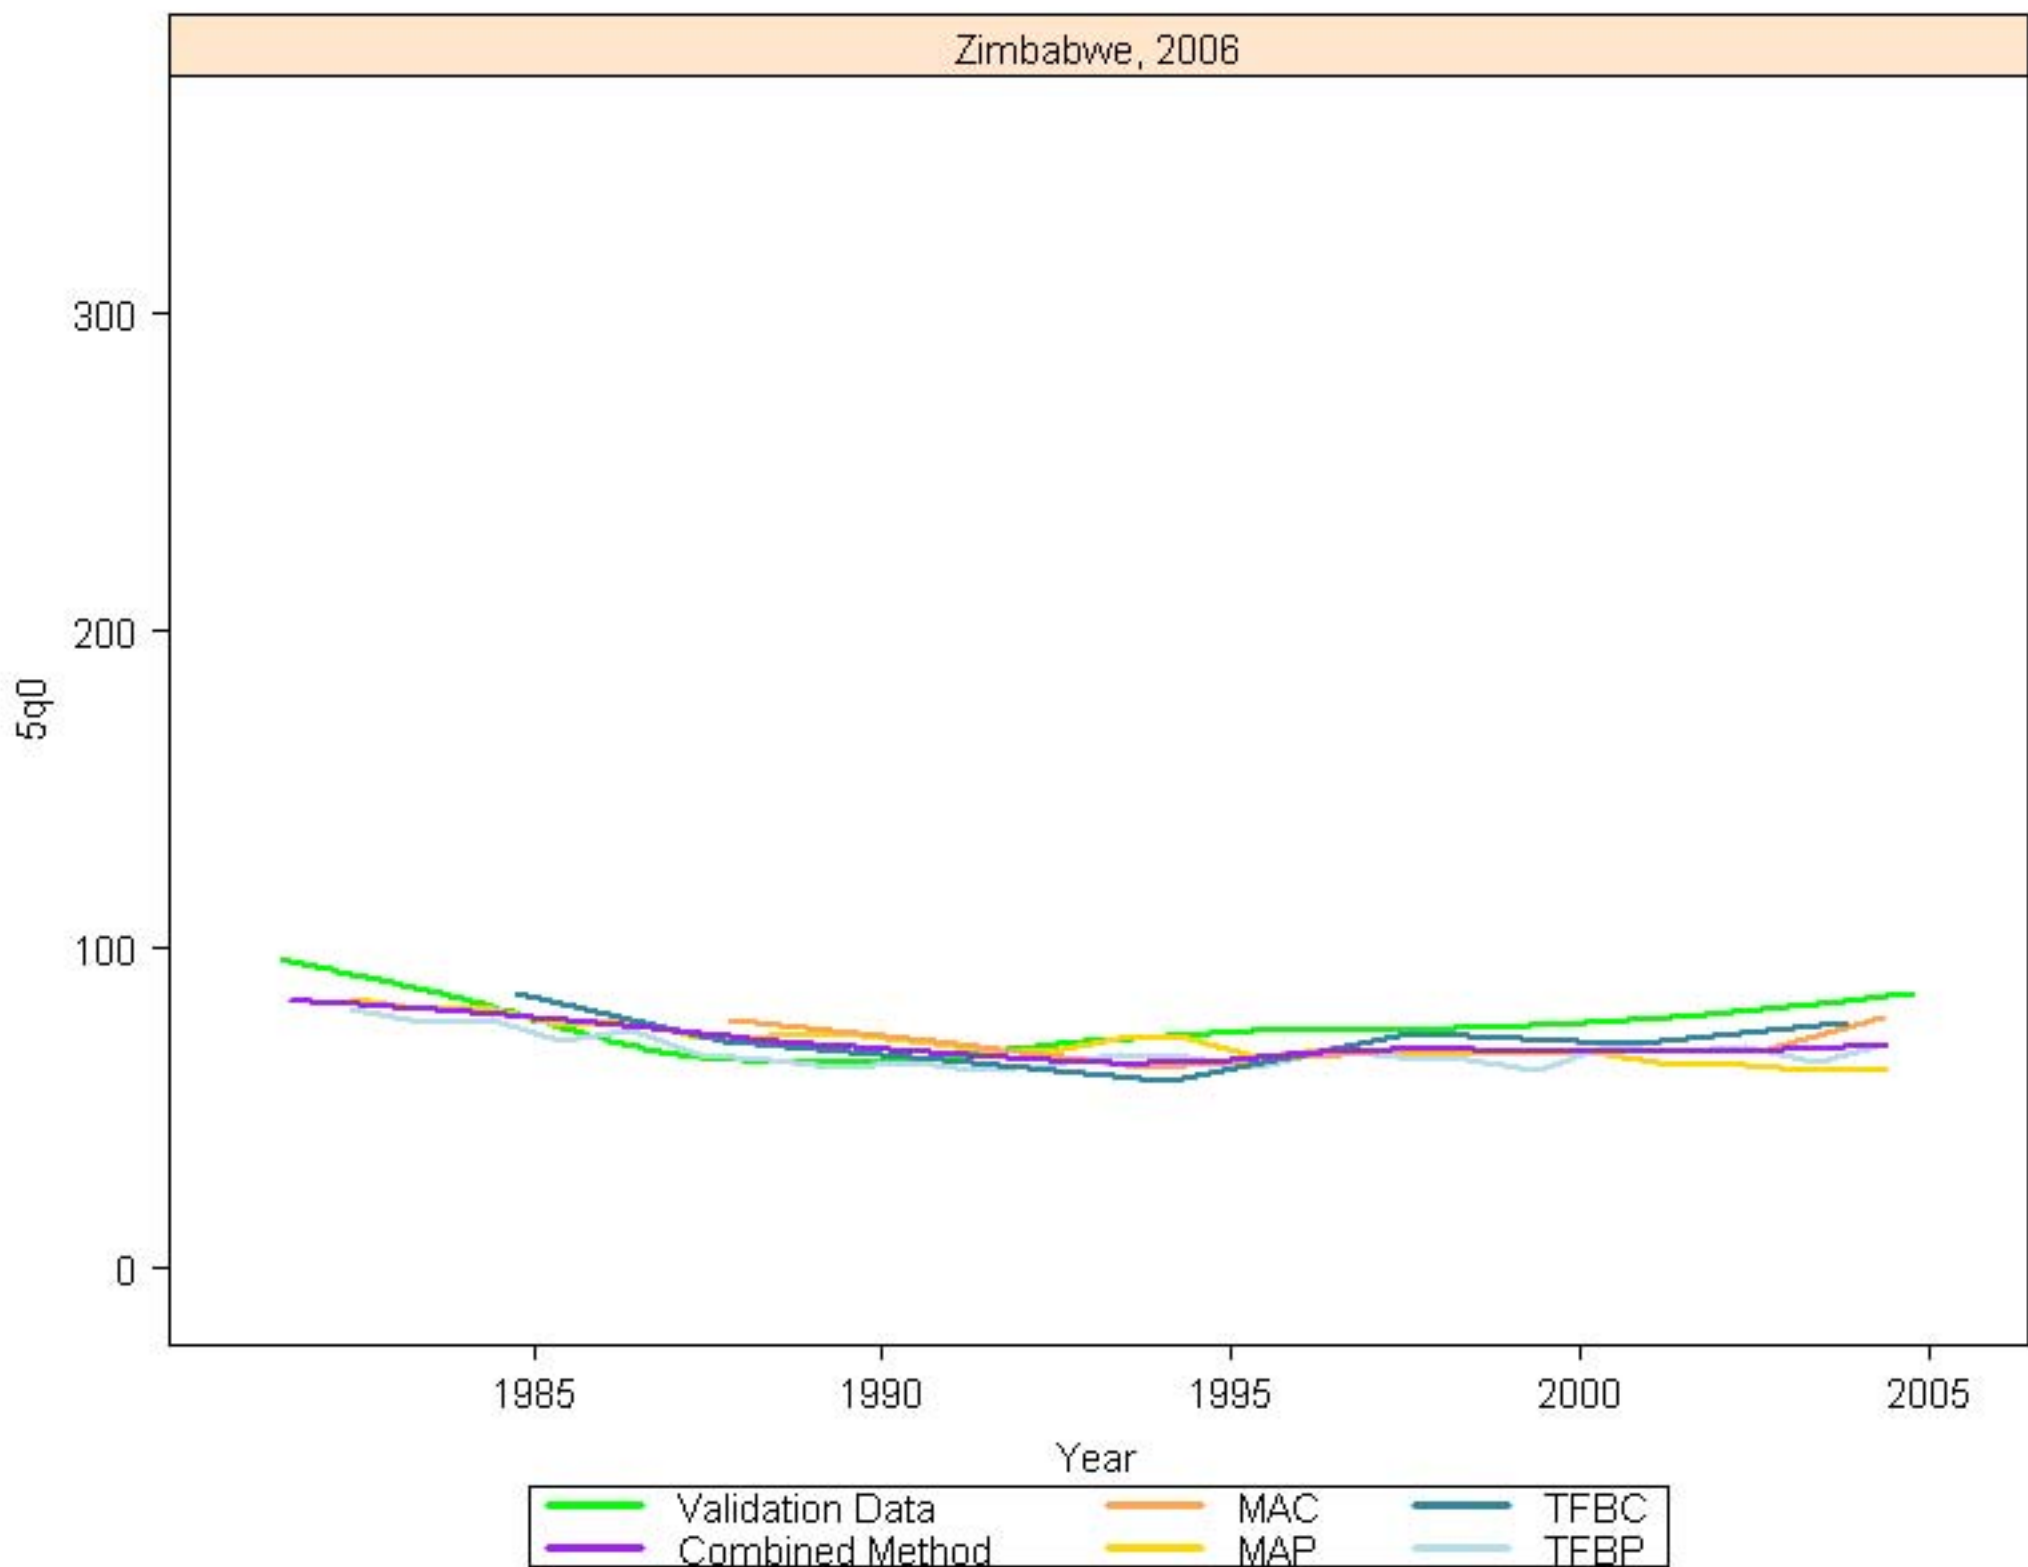

Supplement: pmed.1000253.s002.pdf [file pmed.1000253.s002.pdf]
