# Supplementary material for: Measuring Under-Five Mortality: Validation of New Low-Cost Methods
Source: PubMed Central journal article supplement (PMC2854123; doi:10.1371/journal.pmed.1000253), 2010-04-13

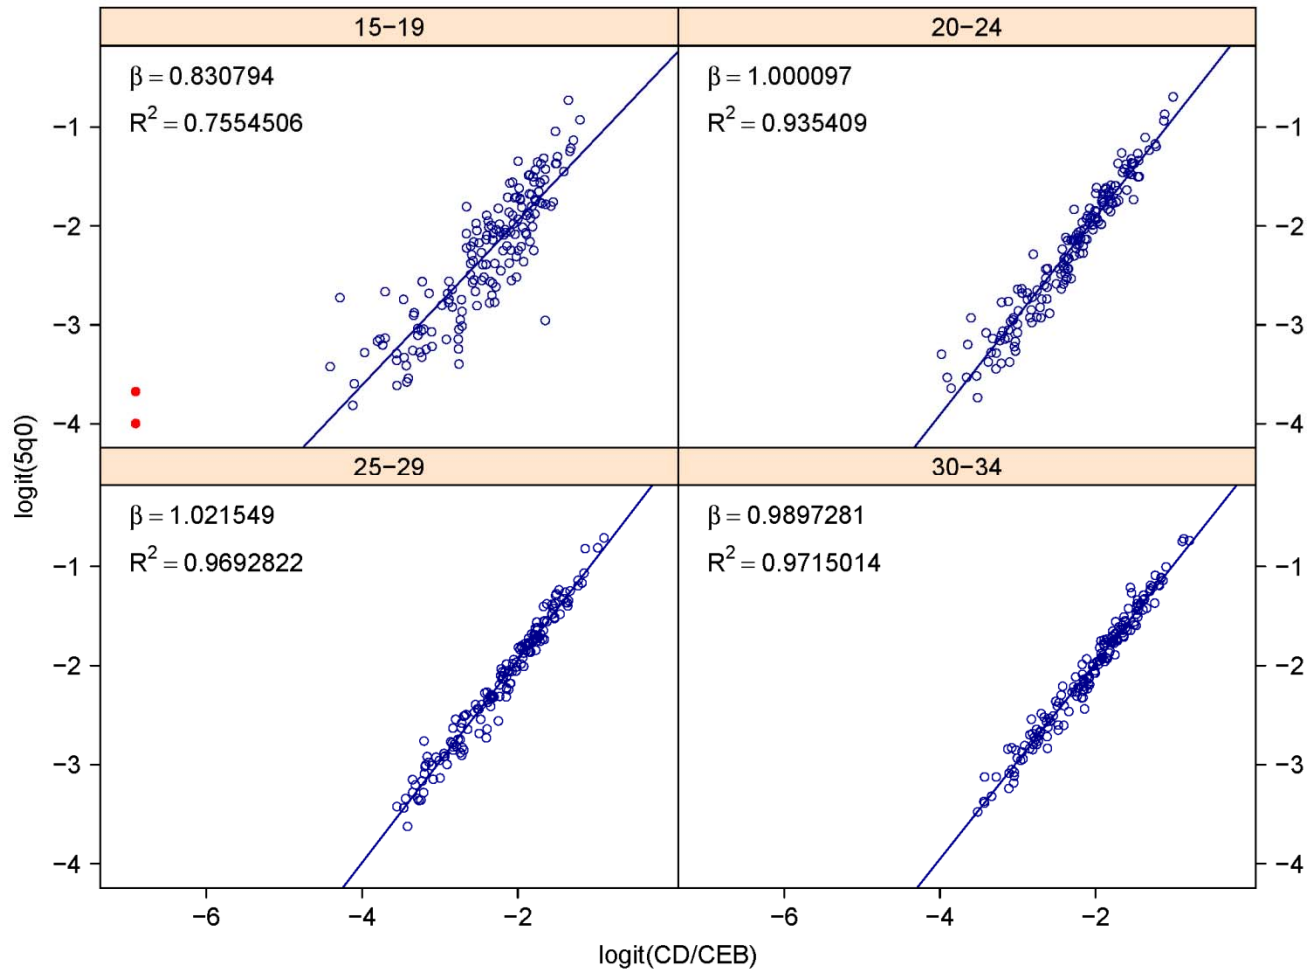

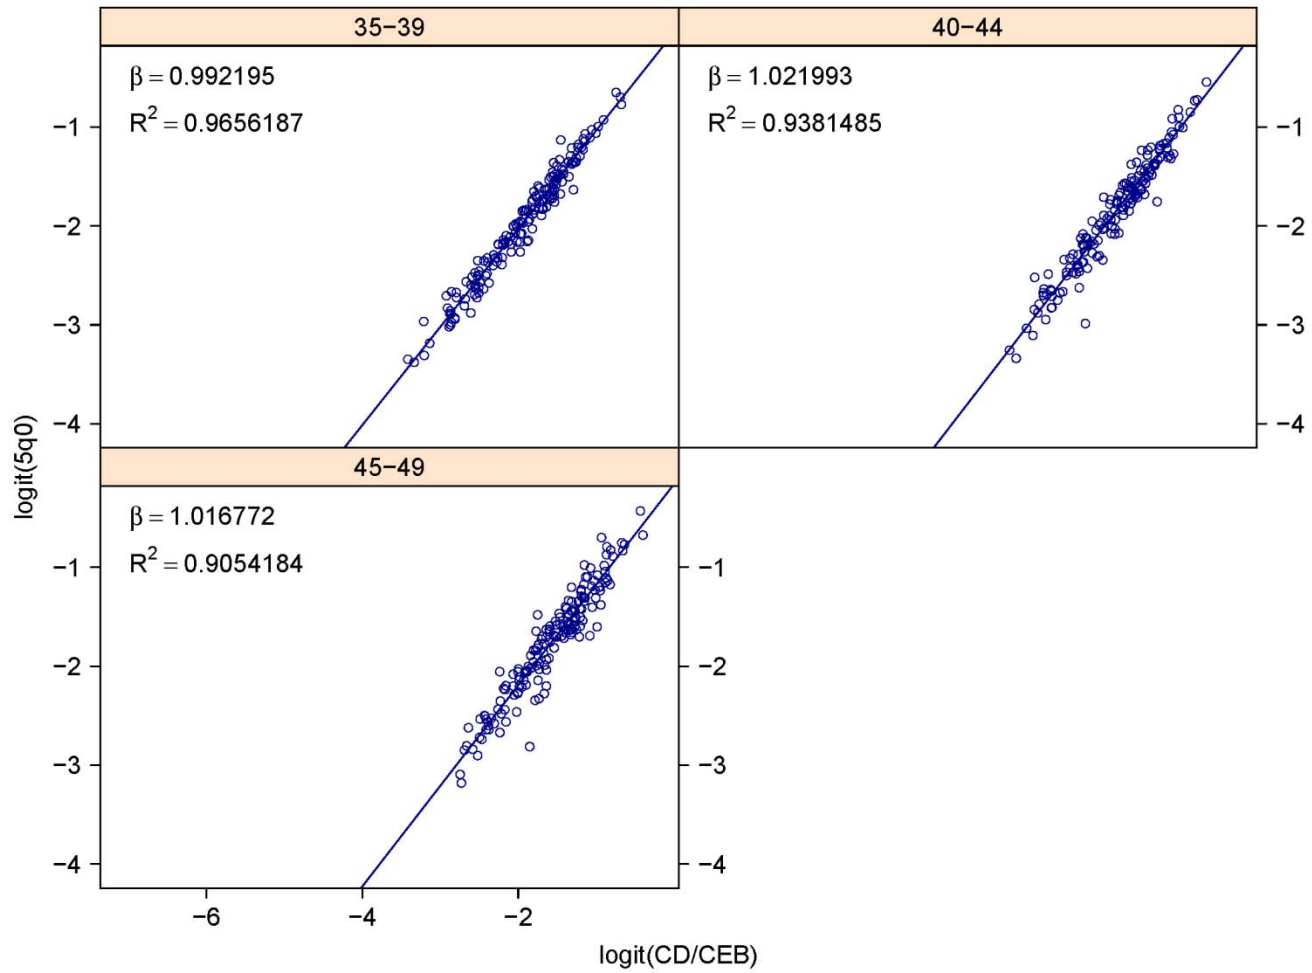

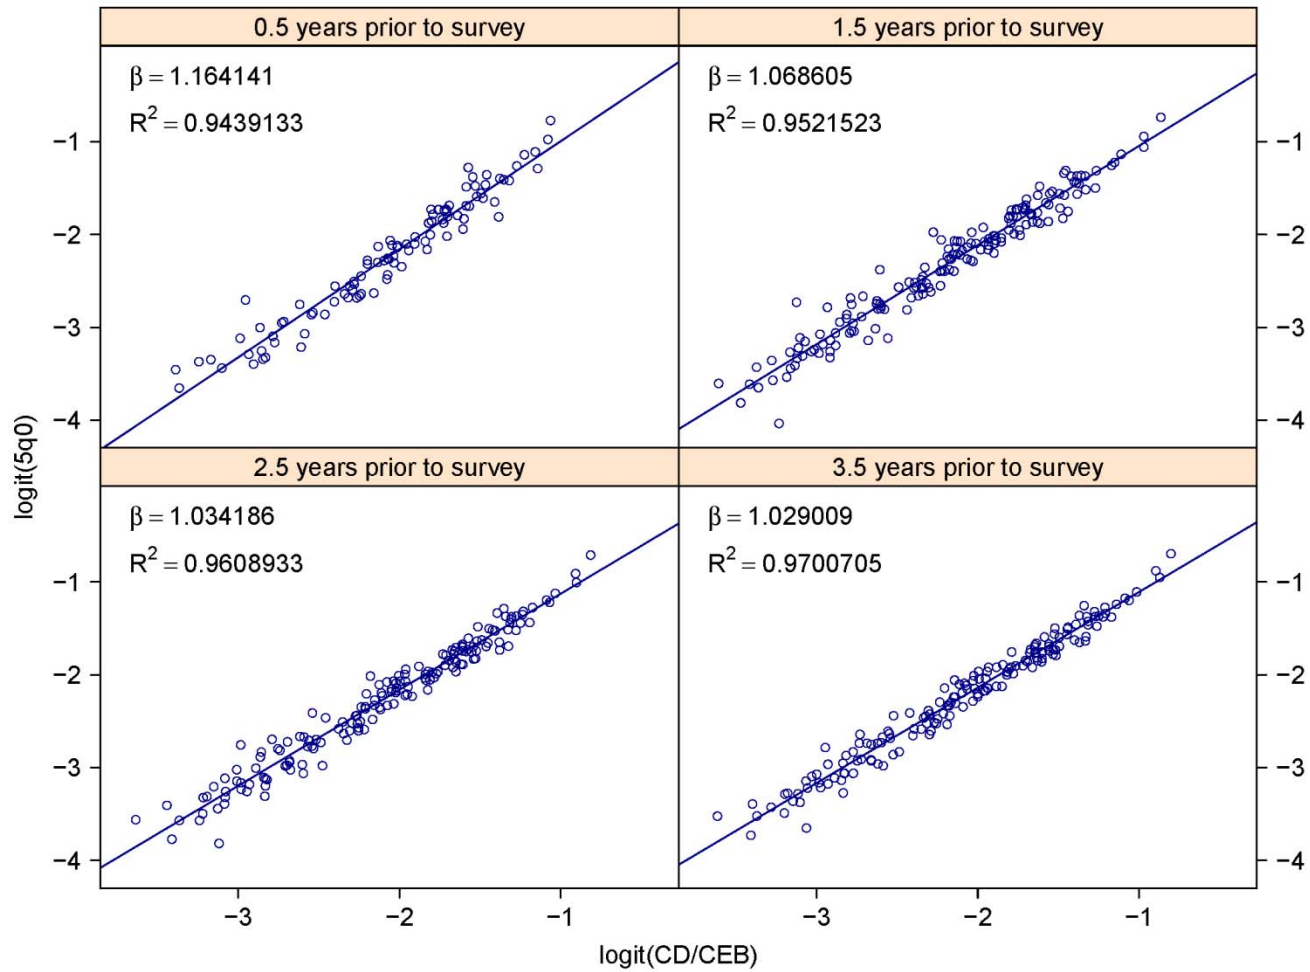

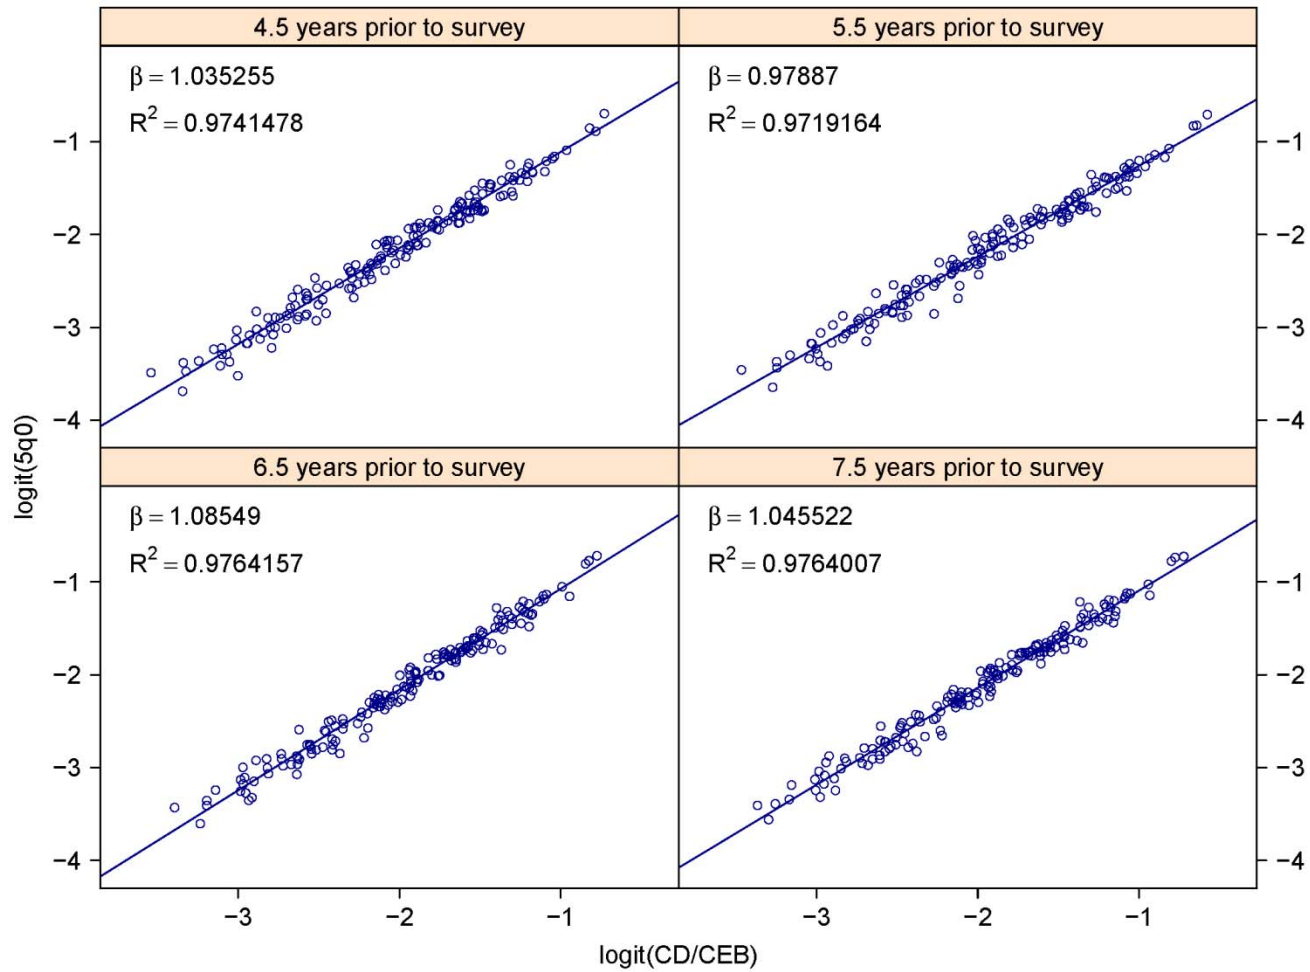

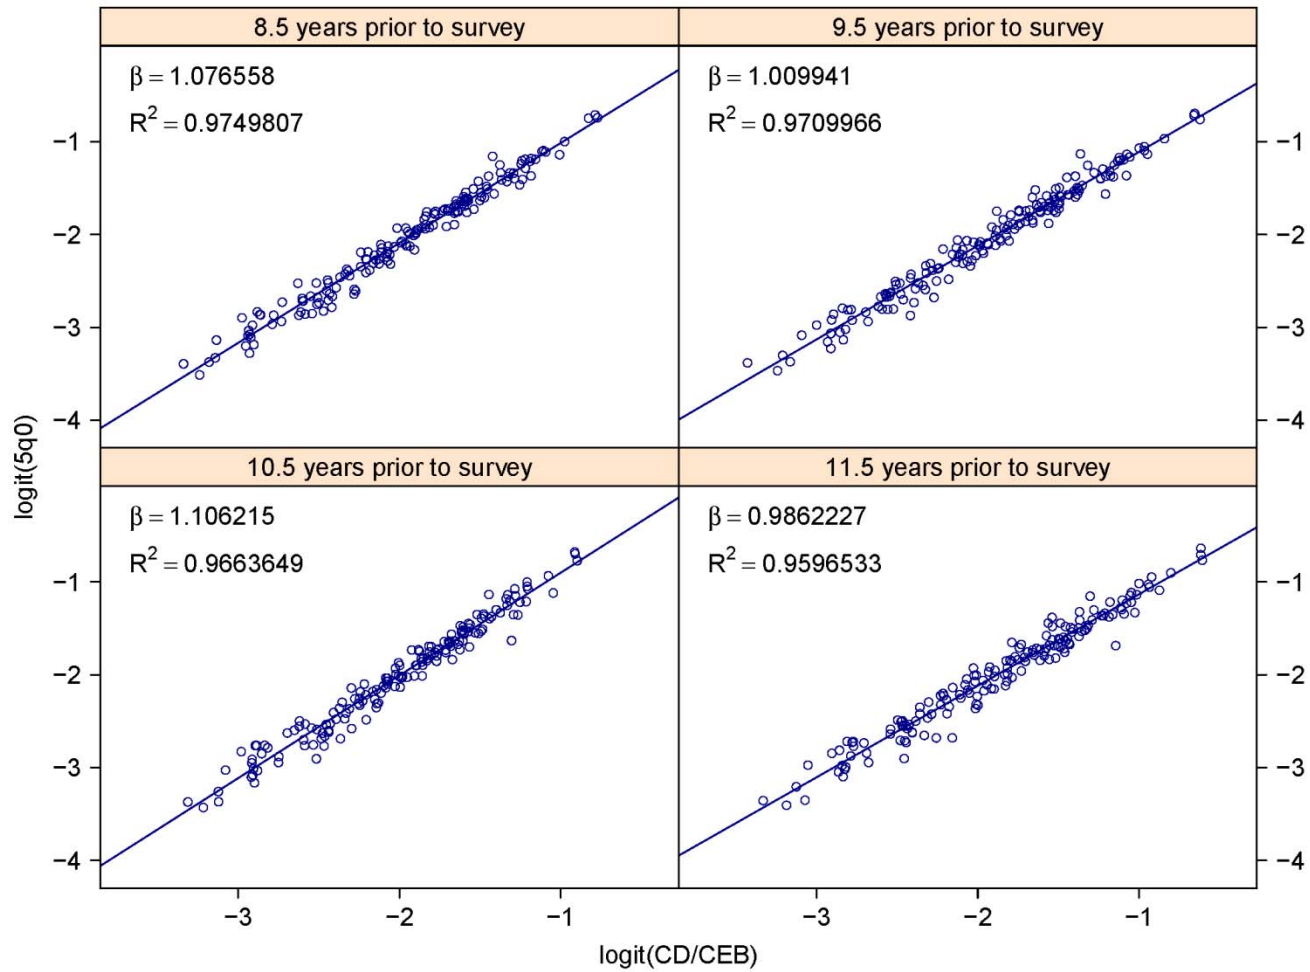

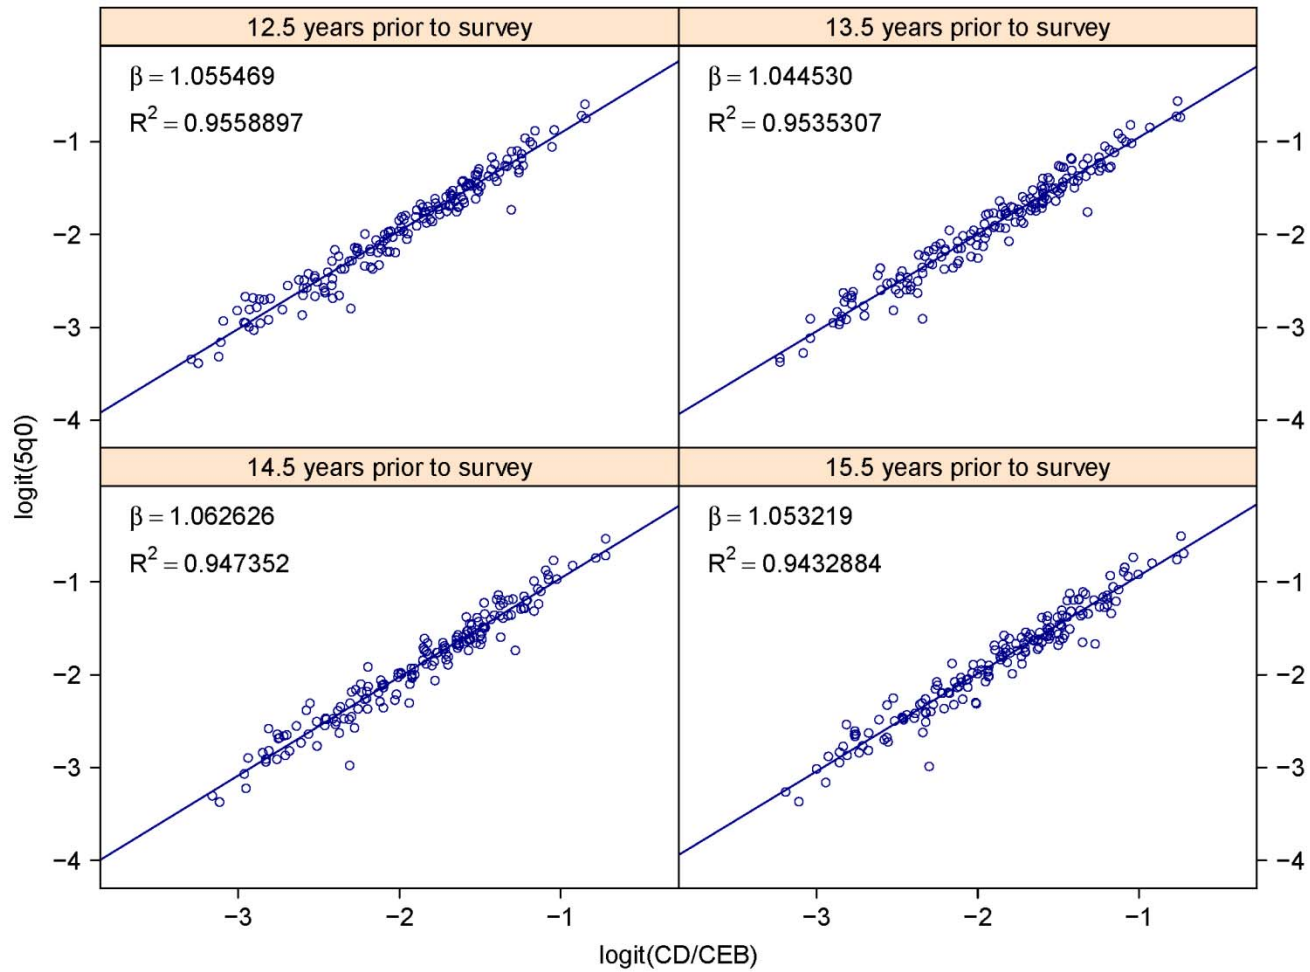

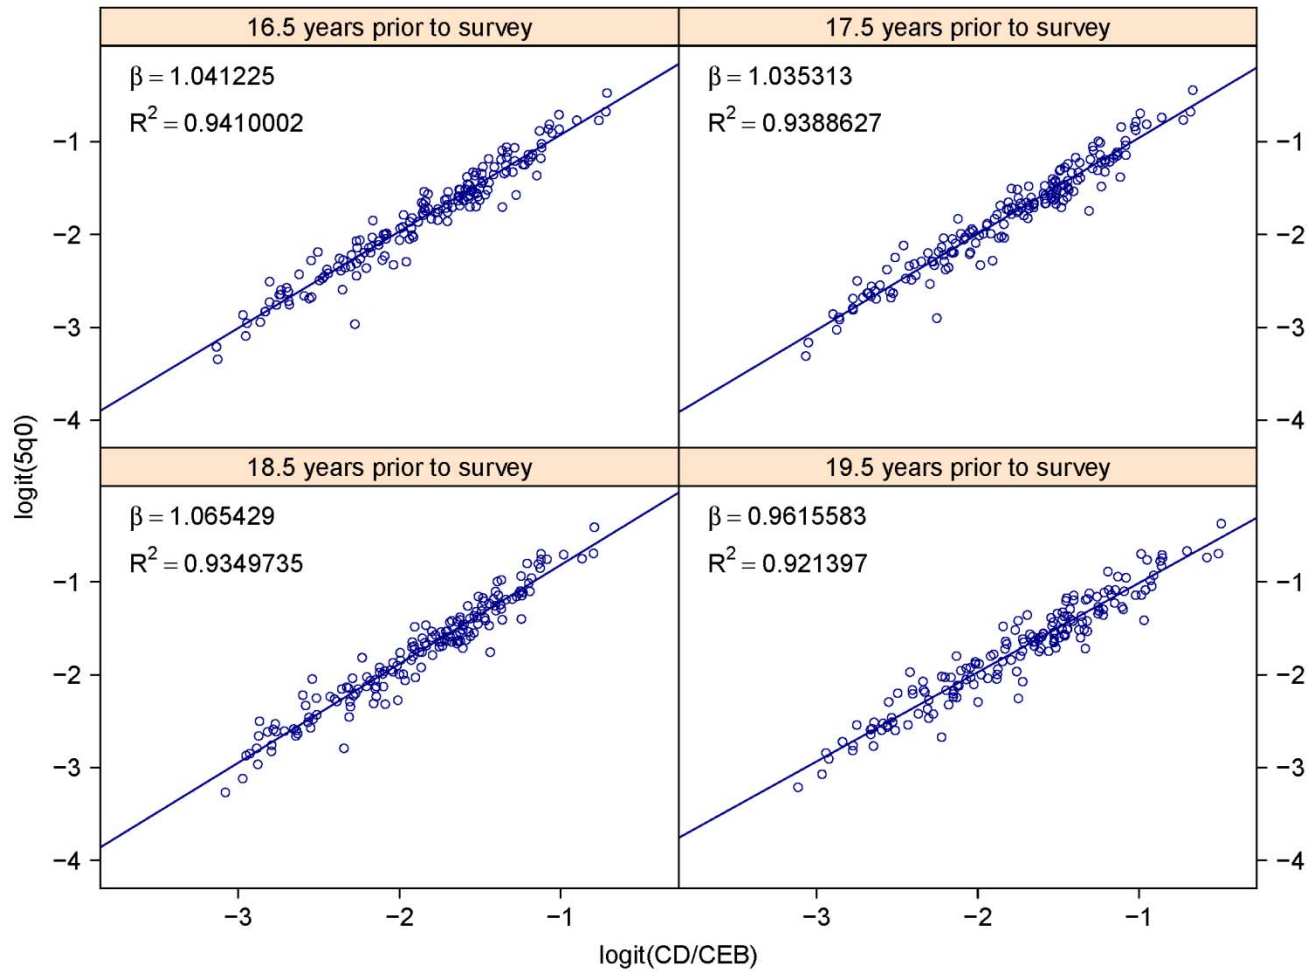

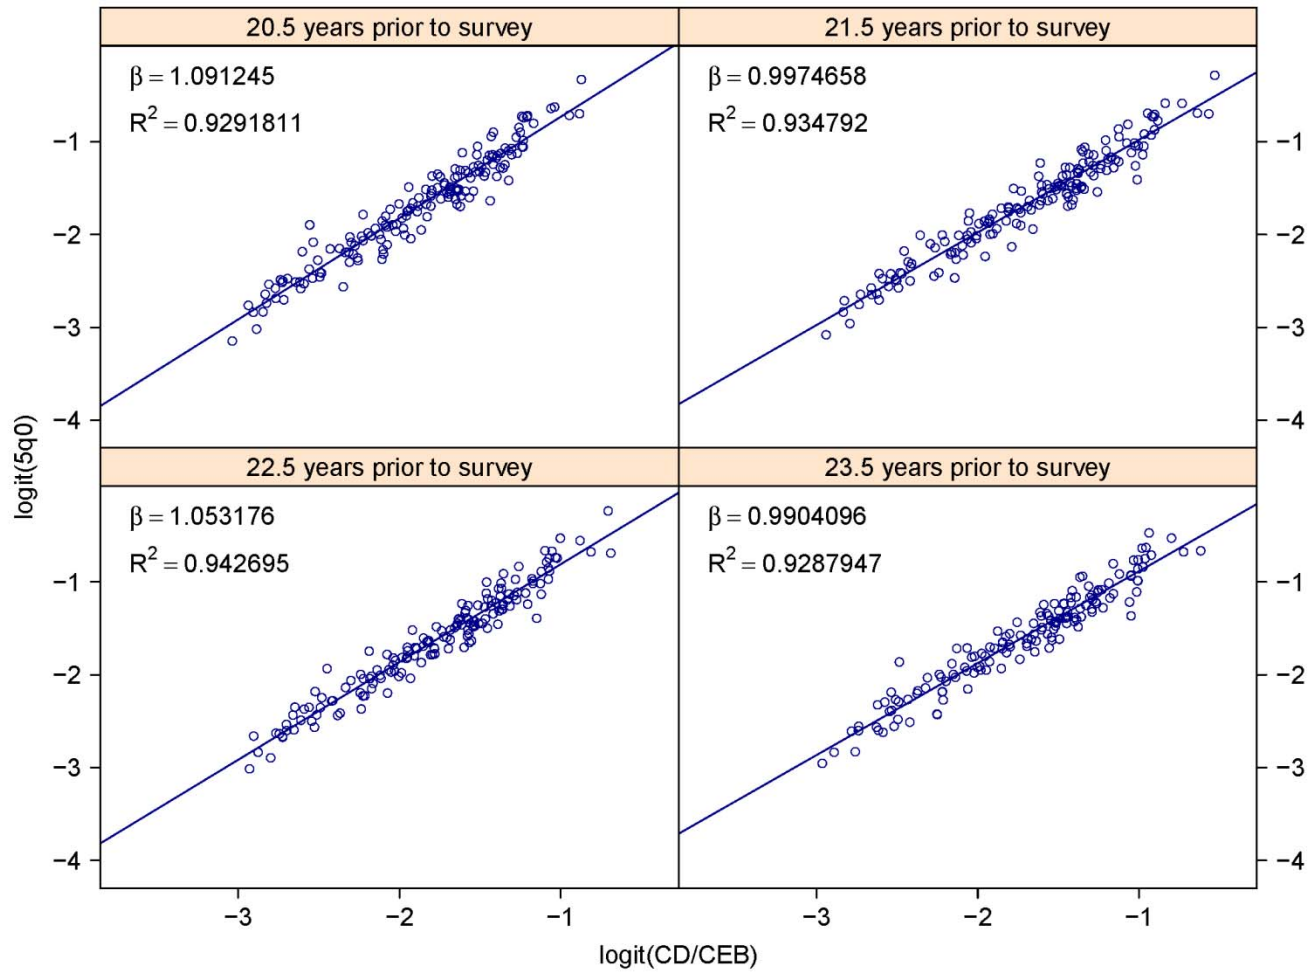



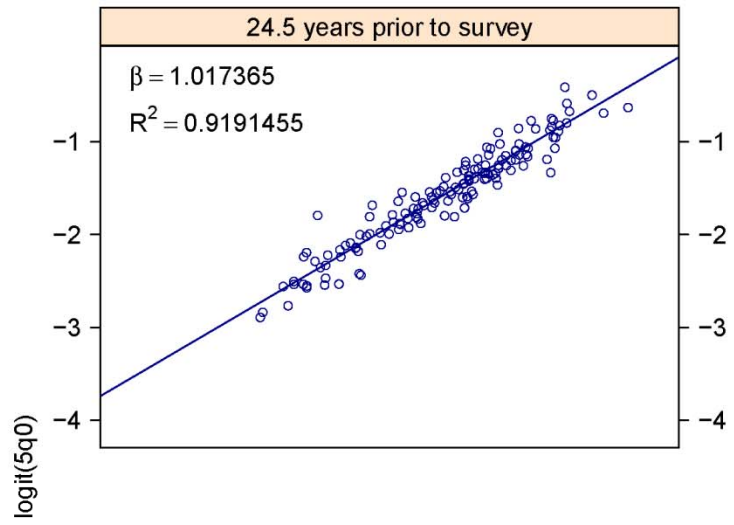

logit(CD/CEB)

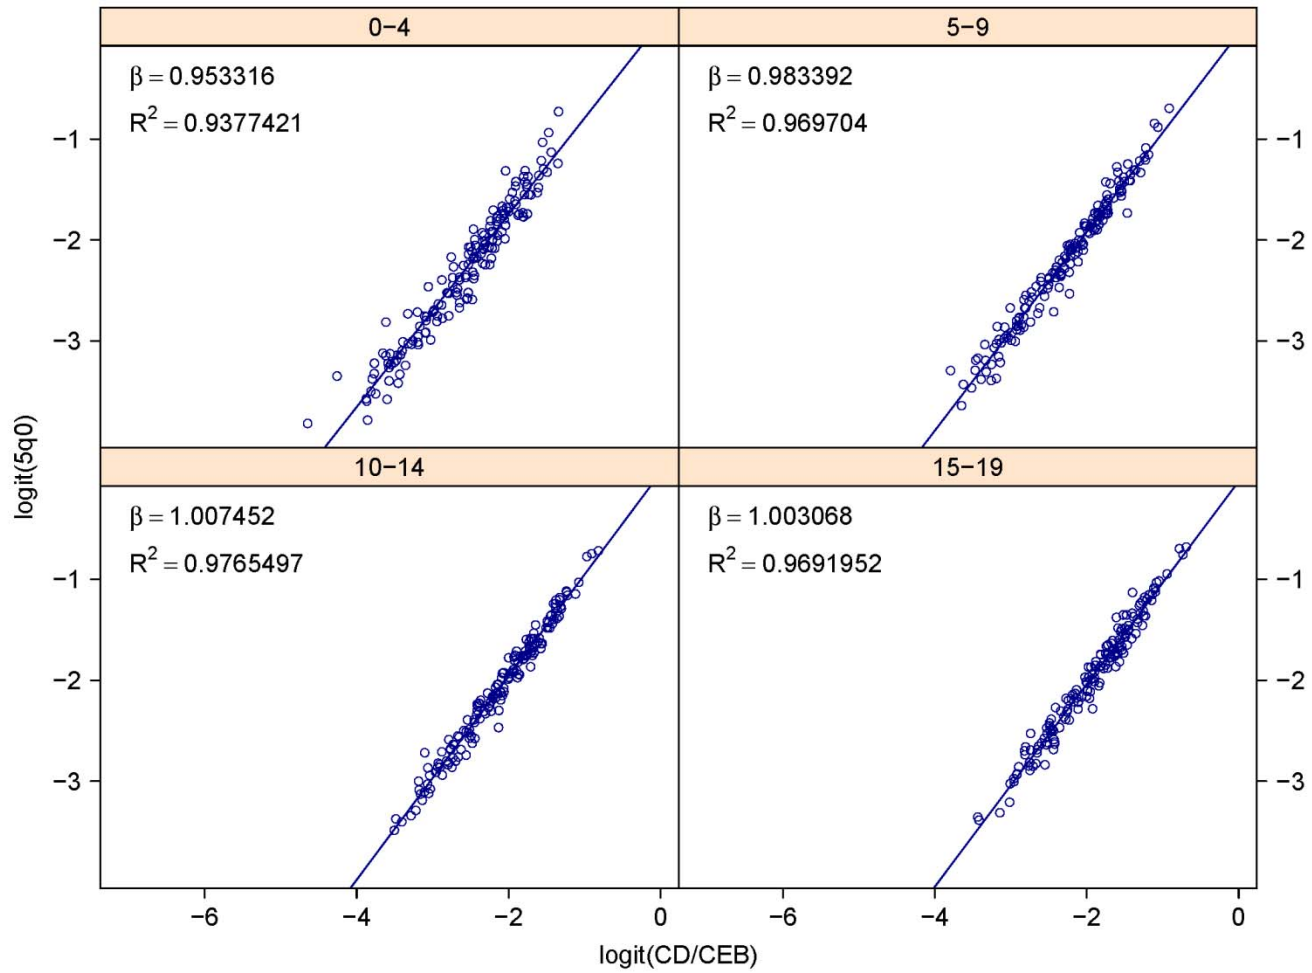

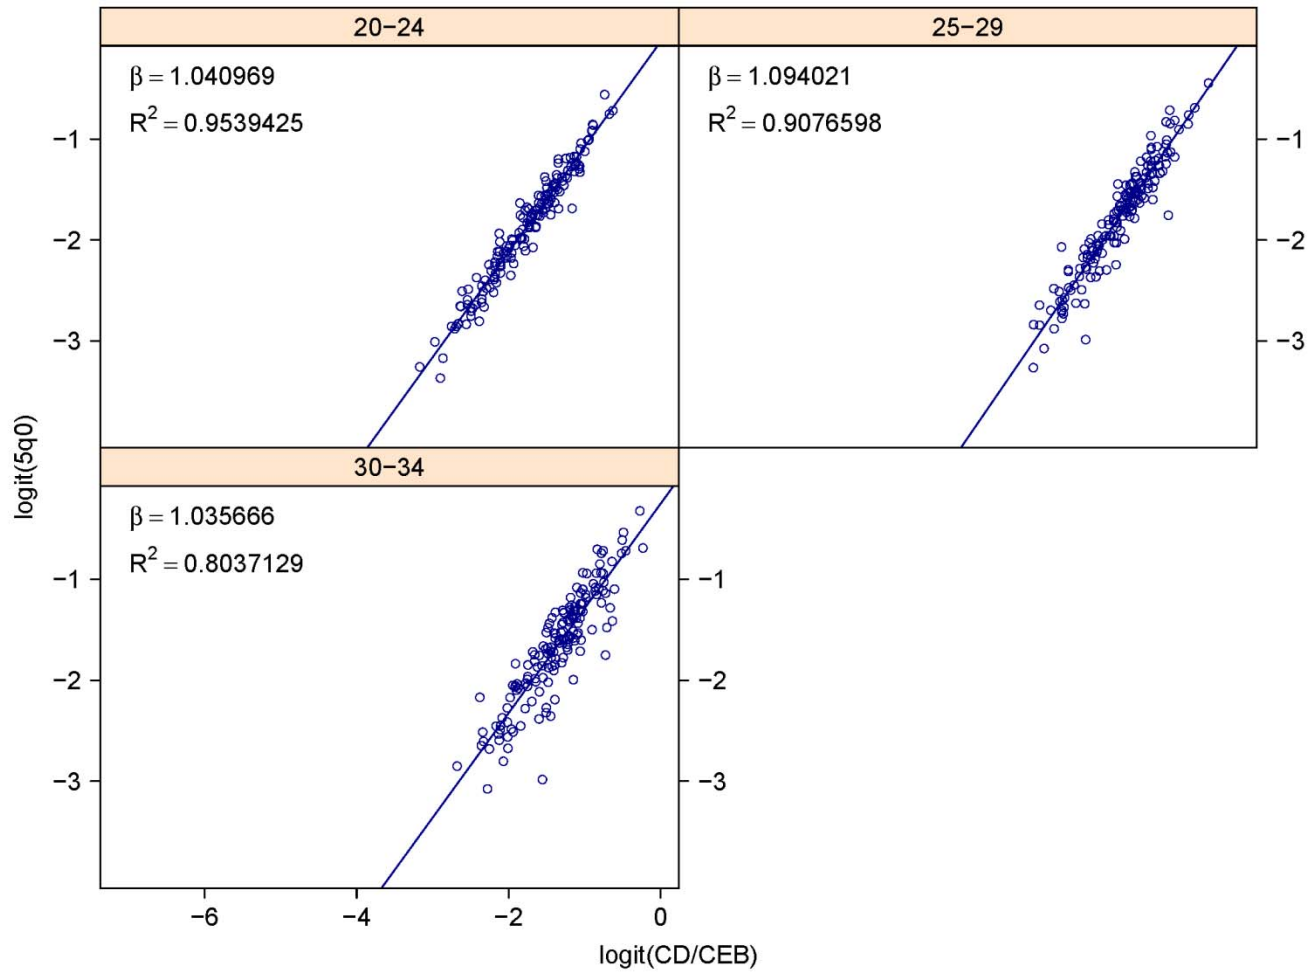













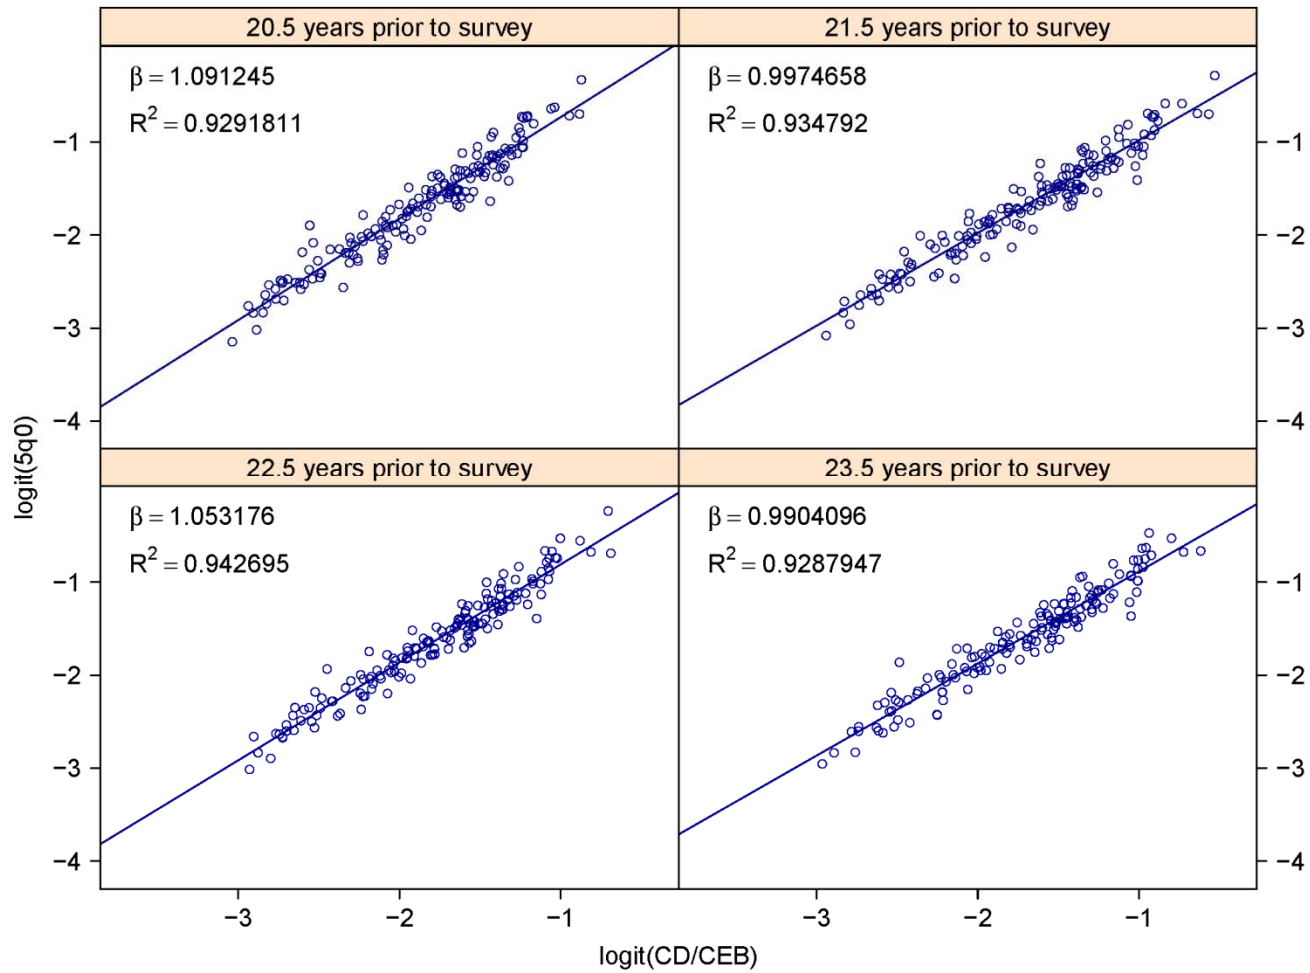

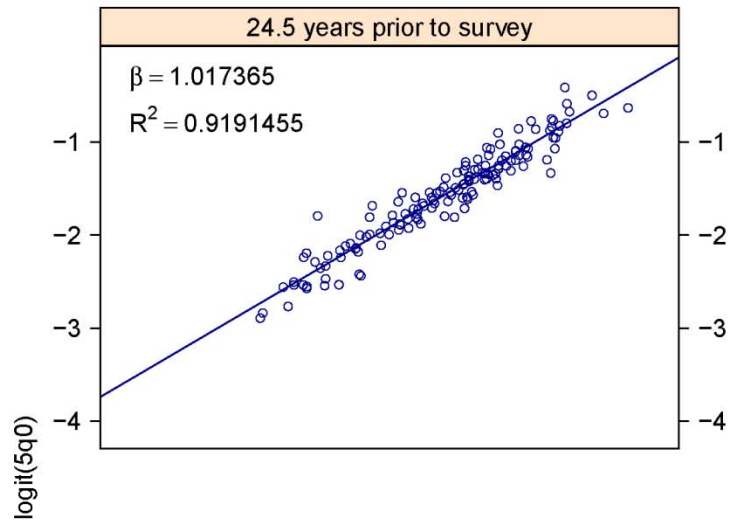

Supplement: pmed.1000253.s001.pdf [file pmed.1000253.s001.pdf]
