# Supplementary material for: Measuring Under-Five Mortality: Validation of New Low-Cost Methods
Source: PubMed Central journal article supplement (PMC2854123; doi:10.1371/journal.pmed.1000253), 2010-04-13
Supplement: pmed.1000253.s003.pdf [file pmed.1000253.s003.pdf]

## Supporting Information Table S1

| Country                  | Year      | Number of Respondents | Total CEB | Total CD | Average CEB | Average CD |
|--------------------------|-----------|-----------------------|-----------|----------|-------------|------------|
| Armenia                  | 2000      | 6430                  | 10891     | 688      | 1.69        | 0.11       |
| Armenia                  | 2005      | 6566                  | 9970      | 517      | 1.52        | 0.08       |
| Azerbaijan               | 2006      | 8444                  | 13264     | 1045     | 1.57        | 0.12       |
| Bangladesh               | 2004      | 11290                 | 33867     | 4800     | 3.00        | 0.43       |
| Bangladesh               | 1993/94   | 9495                  | 32851     | 6134     | 3.46        | 0.65       |
| Bangladesh               | 1996/97   | 8982                  | 29564     | 4985     | 3.29        | 0.55       |
| Bangladesh               | 1999/2000 | 10358                 | 32325     | 5085     | 3.12        | 0.49       |
| Benin                    | 1996      | 5491                  | 18872     | 4036     | 3.44        | 0.73       |
| Benin                    | 2001      | 6219                  | 19247     | 3564     | 3.09        | 0.57       |
| Benin                    | 2006      | 17794                 | 56205     | 8818     | 3.16        | 0.50       |
| Bolivia                  | 1989      | 7923                  | 22094     | 3690     | 2.79        | 0.47       |
| Bolivia                  | 1994      | 8603                  | 23647     | 3896     | 2.75        | 0.45       |
| Bolivia                  | 1998      | 11187                 | 27679     | 3415     | 2.47        | 0.31       |
| Bolivia                  | 2003      | 17654                 | 44130     | 5403     | 2.50        | 0.31       |
| Botswana                 | 1988      | 4368                  | 11272     | 815      | 2.58        | 0.19       |
| Brazil                   | 1986      | 5892                  | 11983     | 1298     | 2.03        | 0.22       |
| Brazil                   | 1996      | 12612                 | 24478     | 1924     | 1.94        | 0.15       |
| Burkina Faso             | 2003      | 12477                 | 41270     | 8390     | 3.31        | 0.67       |
| Burkina Faso             | 1992/93   | 6354                  | 22205     | 5119     | 3.49        | 0.81       |
| Burkina Faso             | 1998/99   | 6445                  | 22987     | 5499     | 3.57        | 0.85       |
| Burundi                  | 1987      | 3970                  | 11998     | 2370     | 3.02        | 0.60       |
| Cambodia                 | 2000      | 15351                 | 39681     | 5767     | 2.58        | 0.38       |
| Cambodia                 | 2005      | 16823                 | 38823     | 4983     | 2.31        | 0.30       |
| Cameroon                 | 1991      | 3871                  | 12357     | 2180     | 3.19        | 0.56       |
| Cameroon                 | 1998      | 5501                  | 16018     | 2593     | 2.91        | 0.47       |
| Cameroon                 | 2004      | 10656                 | 29288     | 4506     | 2.75        | 0.42       |
| Central African Republic | 1994/95   | 5884                  | 17012     | 2984     | 2.89        | 0.51       |
| Chad                     | 2004      | 6085                  | 22571     | 4848     | 3.71        | 0.80       |
| Chad                     | 1996/97   | 7454                  | 26127     | 5760     | 3.50        | 0.77       |
| Colombia                 | 1986      | 5331                  | 11615     | 888      | 2.18        | 0.17       |
| Colombia                 | 1990      | 8489                  | 16688     | 981      | 1.97        | 0.12       |
| Colombia                 | 1995      | 11140                 | 21498     | 1182     | 1.93        | 0.11       |
| Colombia                 | 2000      | 11585                 | 20787     | 944      | 1.79        | 0.08       |
| Colombia                 | 2005      | 38355                 | 68038     | 2750     | 1.77        | 0.07       |
| Comoros                  | 1996      | 3050                  | 7913      | 1127     | 2.59        | 0.37       |
| Congo (Brazzaville)      | 2005      | 7051                  | 16799     | 2084     | 2.38        | 0.30       |

**Table S1:** Characteristics of the Demographic and Health Surveys (DHS) used to build models relating under-five mortality to the ratio of children dead to children ever born (CD/CEB) and other covariates.

| Country            | Year      | Number of Respondents | Total CEB | Total CD | Average CEB | Average CD |
|--------------------|-----------|-----------------------|-----------|----------|-------------|------------|
| Cote d'Ivoire      | 1994      | 8099                  | 25026     | 4250     | 3.09        | 0.52       |
| Cote d'Ivoire      | 2005      | 5183                  | 12957     | 1807     | 2.50        | 0.35       |
| Cote d'Ivoire      | 1998/99   | 3040                  | 8421      | 1467     | 2.77        | 0.48       |
| Dominican Republic | 1986      | 7645                  | 18328     | 2090     | 2.40        | 0.27       |
| Dominican Republic | 1991      | 7320                  | 15761     | 1351     | 2.15        | 0.18       |
| Dominican Republic | 1996      | 8422                  | 18079     | 1451     | 2.15        | 0.17       |
| Dominican Republic | 2002      | 23384                 | 49952     | 3107     | 2.14        | 0.13       |
| Dominican Republic | 2007      | 27195                 | 54485     | 2871     | 2.00        | 0.11       |
| Ecuador            | 1987      | 4713                  | 11835     | 1422     | 2.51        | 0.30       |
| Egypt              | 1988      | 8911                  | 35795     | 6480     | 4.02        | 0.73       |
| Egypt              | 1992      | 9864                  | 38211     | 5801     | 3.87        | 0.59       |
| Egypt              | 1995      | 14779                 | 54732     | 7875     | 3.70        | 0.53       |
| Egypt              | 2000      | 15573                 | 54623     | 6238     | 3.51        | 0.40       |
| Egypt              | 2003      | 9159                  | 29234     | 2661     | 3.19        | 0.29       |
| Egypt              | 2005      | 19474                 | 59884     | 5082     | 3.08        | 0.26       |
| Eritrea            | 1995      | 5054                  | 15196     | 2757     | 3.01        | 0.55       |
| Ethiopia           | 2000      | 15367                 | 47501     | 10724    | 3.09        | 0.70       |
| Ethiopia           | 2005      | 14070                 | 44191     | 7801     | 3.14        | 0.55       |
| Gabon              | 2000      | 6183                  | 15763     | 1662     | 2.55        | 0.27       |
| Ghana              | 1988      | 4488                  | 14216     | 2436     | 3.17        | 0.54       |
| Ghana              | 1993      | 4562                  | 13298     | 1953     | 2.91        | 0.43       |
| Ghana              | 1998      | 4843                  | 12758     | 1692     | 2.63        | 0.35       |
| Ghana              | 2003      | 5691                  | 14413     | 1806     | 2.53        | 0.32       |
| Guatemala          | 1987      | 5160                  | 14698     | 1983     | 2.85        | 0.38       |
| Guatemala          | 1995      | 12403                 | 35433     | 3850     | 2.86        | 0.31       |
| Guatemala          | 1998/99   | 6021                  | 17025     | 1558     | 2.83        | 0.26       |
| Guinea             | 1999      | 6753                  | 23122     | 5348     | 3.42        | 0.79       |
| Guinea             | 2005      | 7954                  | 26972     | 6009     | 3.39        | 0.76       |
| Haiti              | 2000      | 10159                 | 25412     | 4298     | 2.50        | 0.42       |
| Haiti              | 2005      | 10757                 | 23928     | 3243     | 2.22        | 0.30       |
| Haiti              | 1994/95   | 5356                  | 12759     | 2217     | 2.38        | 0.41       |
| Honduras           | 2005      | 19948                 | 47452     | 2651     | 2.38        | 0.13       |
| India              | 1992/93   | 89425                 | 277158    | 41653    | 3.10        | 0.47       |
| India              | 1998/99   | 90303                 | 270074    | 35572    | 2.99        | 0.39       |
| India              | 2005/2006 | 124385                | 280872    | 32730    | 2.26        | 0.26       |
| Indonesia          | 1987      | 11884                 | 40392     | 5875     | 3.40        | 0.49       |
| Indonesia          | 1991      | 22909                 | 71466     | 9514     | 3.12        | 0.42       |
| Indonesia          | 1994      | 28168                 | 85923     | 10469    | 3.05        | 0.37       |
| Indonesia          | 1997      | 28810                 | 81262     | 8604     | 2.82        | 0.30       |
| Indonesia          | 2002/2003 | 29483                 | 78325     | 7036     | 2.66        | 0.24       |

**Table S1:** Characteristics of the Demographic and Health Surveys (DHS) used to build models relating under-five mortality to the ratio of children dead to children ever born (CD/CEB) and other covariates.

| Country         | Year      | Number of Respondents | Total CEB | Total CD | Average CEB | Average CD |
|-----------------|-----------|-----------------------|-----------|----------|-------------|------------|
| Jordan          | 1990      | 6461                  | 32889     | 1883     | 5.09        | 0.29       |
| Jordan          | 1997      | 5548                  | 23941     | 1099     | 4.32        | 0.20       |
| Jordan          | 2002      | 6006                  | 24324     | 949      | 4.05        | 0.16       |
| Kazakhstan      | 1995      | 3771                  | 6847      | 387      | 1.82        | 0.10       |
| Kazakhstan      | 1999      | 4800                  | 8467      | 647      | 1.76        | 0.13       |
| Kenya           | 1989      | 7150                  | 26232     | 2775     | 3.67        | 0.39       |
| Kenya           | 1993      | 7540                  | 23882     | 2637     | 3.17        | 0.35       |
| Kenya           | 1998      | 7881                  | 22814     | 2588     | 2.89        | 0.33       |
| Kenya           | 2003      | 8195                  | 22548     | 2675     | 2.75        | 0.33       |
| Kyrgyz Republic | 1997      | 3848                  | 9047      | 878      | 2.35        | 0.23       |
| Lesotho         | 2004      | 7095                  | 14585     | 1561     | 2.06        | 0.22       |
| Liberia         | 1986      | 5239                  | 16343     | 4075     | 3.12        | 0.78       |
| Madagascar      | 1992      | 6260                  | 20036     | 3730     | 3.20        | 0.60       |
| Madagascar      | 1997      | 7060                  | 22698     | 4209     | 3.21        | 0.60       |
| Madagascar      | 2003/2004 | 7949                  | 23389     | 3110     | 2.94        | 0.39       |
| Malawi          | 1992      | 4849                  | 16883     | 4509     | 3.48        | 0.93       |
| Malawi          | 2000      | 13220                 | 41404     | 9375     | 3.13        | 0.71       |
| Malawi          | 2004      | 11698                 | 35452     | 6349     | 3.03        | 0.54       |
| Mali            | 1987      | 3200                  | 12682     | 3956     | 3.96        | 1.24       |
| Mali            | 2001      | 12849                 | 49286     | 12612    | 3.84        | 0.98       |
| Mali            | 2006      | 14583                 | 52530     | 12407    | 3.60        | 0.85       |
| Mali            | 1995/96   | 9704                  | 38492     | 10687    | 3.97        | 1.10       |
| Mauritania      | 2000/01   | 7728                  | 20138     | 2381     | 2.61        | 0.31       |
| Mexico          | 1987      | 9310                  | 23617     | 2220     | 2.54        | 0.24       |
| Morocco         | 1987      | 5982                  | 25518     | 3769     | 4.27        | 0.63       |
| Morocco         | 1992      | 9256                  | 22657     | 2840     | 2.45        | 0.31       |
| Morocco         | 2003-2004 | 16798                 | 31697     | 2807     | 1.89        | 0.17       |
| Mozambique      | 1997      | 8779                  | 26871     | 6177     | 3.06        | 0.70       |
| Mozambique      | 2003      | 12418                 | 38951     | 8310     | 3.14        | 0.67       |
| Namibia         | 1992      | 5421                  | 13206     | 1347     | 2.44        | 0.25       |
| Namibia         | 2000      | 6755                  | 14508     | 1013     | 2.15        | 0.15       |
| Nepal           | 1996      | 8429                  | 28828     | 5345     | 3.42        | 0.63       |
| Nepal           | 2001      | 8726                  | 28775     | 4415     | 3.30        | 0.51       |
| Nepal           | 2006      | 10793                 | 26340     | 3351     | 2.44        | 0.31       |
| Nicaragua       | 2001      | 13060                 | 32644     | 2503     | 2.50        | 0.19       |
| Nicaragua       | 1997/98   | 13634                 | 35328     | 2884     | 2.59        | 0.21       |
| Niger           | 1992      | 6503                  | 25048     | 8000     | 3.85        | 1.23       |
| Niger           | 1998      | 7577                  | 29784     | 9134     | 3.93        | 1.21       |
| Niger           | 2006      | 9223                  | 36861     | 9162     | 4.00        | 0.99       |

**Table S1:** Characteristics of the Demographic and Health Surveys (DHS) used to build models relating under-five mortality to the ratio of children dead to children ever born (CD/CEB) and other covariates.

| Country             | Year      | Number of Respondents | Total CEB | Total CD | Average CEB | Average CD |
|---------------------|-----------|-----------------------|-----------|----------|-------------|------------|
| Nigeria             | 1990      | 8781                  | 29075     | 6033     | 3.31        | 0.69       |
| Nigeria             | 2003      | 7620                  | 23579     | 5432     | 3.09        | 0.71       |
| Pakistan            | 1990/91   | 6611                  | 26870     | 3578     | 4.06        | 0.54       |
| Pakistan            | 2006/07   | 10023                 | 38824     | 4198     | 3.87        | 0.42       |
| Paraguay            | 1990      | 5827                  | 14438     | 845      | 2.48        | 0.14       |
| Peru                | 1986      | 4999                  | 13291     | 1853     | 2.66        | 0.37       |
| Peru                | 1992      | 15882                 | 35910     | 4133     | 2.26        | 0.26       |
| Peru                | 1996      | 28951                 | 64997     | 6345     | 2.25        | 0.22       |
| Peru                | 2000      | 27843                 | 58785     | 5373     | 2.11        | 0.19       |
| Peru                | 2004-2008 | 11717                 | 22722     | 1686     | 1.94        | 0.14       |
| Philippines         | 1993      | 15029                 | 34560     | 2589     | 2.30        | 0.17       |
| Philippines         | 1998      | 13983                 | 30142     | 2158     | 2.16        | 0.15       |
| Philippines         | 2003      | 13633                 | 29714     | 1758     | 2.18        | 0.13       |
| Rwanda              | 1992      | 6551                  | 20107     | 3994     | 3.07        | 0.61       |
| Rwanda              | 2000      | 10421                 | 28966     | 6351     | 2.78        | 0.61       |
| Rwanda              | 2005      | 11321                 | 30377     | 6139     | 2.68        | 0.54       |
| Senegal             | 1986      | 4415                  | 14389     | 3432     | 3.26        | 0.78       |
| Senegal             | 1997      | 8593                  | 26367     | 4471     | 3.07        | 0.52       |
| Senegal             | 2005      | 14602                 | 38770     | 5815     | 2.66        | 0.40       |
| Senegal             | 1992/93   | 6310                  | 20815     | 4012     | 3.30        | 0.64       |
| South Africa        | 1998      | 11735                 | 22756     | 1809     | 1.94        | 0.15       |
| Sri Lanka           | 1987      | 5864                  | 17644     | 1009     | 3.01        | 0.17       |
| Sudan               | 1990      | 5860                  | 25805     | 3752     | 4.40        | 0.64       |
| Swaziland           | 2006      | 4987                  | 11383     | 1136     | 2.28        | 0.23       |
| Tanzania            | 1992      | 9238                  | 28688     | 4896     | 3.11        | 0.53       |
| Tanzania            | 1996      | 8120                  | 25063     | 4081     | 3.09        | 0.50       |
| Tanzania            | 1999      | 4029                  | 11787     | 2078     | 2.93        | 0.52       |
| Tanzania            | 2004      | 10329                 | 30077     | 4530     | 2.91        | 0.44       |
| Thailand            | 1987      | 6775                  | 18612     | 1501     | 2.75        | 0.22       |
| Togo                | 1988      | 3360                  | 10782     | 2002     | 3.21        | 0.60       |
| Togo                | 1998      | 8569                  | 25119     | 4160     | 2.93        | 0.49       |
| Trinidad and Tobago | 1987      | 3806                  | 7837      | 375      | 2.06        | 0.10       |
| Tunisia             | 1988      | 4184                  | 16463     | 1779     | 3.93        | 0.43       |
| Turkey              | 1993      | 6519                  | 19827     | 2418     | 3.04        | 0.37       |
| Turkey              | 1998      | 8576                  | 17209     | 1753     | 2.01        | 0.20       |
| Turkey              | 2003      | 8075                  | 21173     | 1697     | 2.62        | 0.21       |

**Table S1:** Characteristics of the Demographic and Health Surveys (DHS) used to build models relating under-five mortality to the ratio of children dead to children ever born (CD/CEB) and other covariates.

| Country    | Year    | Number of Respondents | Total CEB | Total CD | Average CEB | Average CD |
|------------|---------|-----------------------|-----------|----------|-------------|------------|
| Uganda     | 1988    | 4730                  | 16523     | 3152     | 3.49        | 0.67       |
| Uganda     | 1995    | 7070                  | 24087     | 4097     | 3.41        | 0.58       |
| Uganda     | 2006    | 8531                  | 30155     | 4961     | 3.53        | 0.58       |
| Uganda     | 2000/01 | 7246                  | 24922     | 4209     | 3.44        | 0.58       |
| Uzbekistan | 1996    | 4415                  | 9979      | 603      | 2.26        | 0.14       |
| Vietnam    | 1997    | 5664                  | 15805     | 940      | 2.79        | 0.17       |
| Vietnam    | 2002    | 5665                  | 14394     | 808      | 2.54        | 0.14       |
| Yemen      | 1991/92 | 5687                  | 27798     | 4872     | 4.89        | 0.86       |
| Zambia     | 1992    | 7060                  | 21921     | 3802     | 3.10        | 0.54       |
| Zambia     | 1996    | 8021                  | 24358     | 4589     | 3.04        | 0.57       |
| Zambia     | 2001/02 | 7658                  | 23211     | 4047     | 3.03        | 0.53       |
| Zimbabwe   | 1988    | 4201                  | 12405     | 1212     | 2.95        | 0.29       |
| Zimbabwe   | 1994    | 6128                  | 16495     | 1549     | 2.69        | 0.25       |
| Zimbabwe   | 1999    | 5907                  | 13628     | 1242     | 2.31        | 0.21       |
| Zimbabwe   | 2005/06 | 8907                  | 19174     | 1425     | 2.15        | 0.16       |

**Table S1:** Characteristics of the Demographic and Health Surveys (DHS) used to build models relating under-five mortality to the ratio of children dead to children ever born (CD/CEB) and other covariates.
